# Supplementary material for: Members of a Large Retroposon Family Are Determinants of Post-Transcriptional Gene Expression in Leishmania
Source: PLoS Pathog. 2007 Sep 28;3(9):e136. doi: 10.1371/journal.ppat.0030136 (PMC2323293; doi:10.1371/journal.ppat.0030136)
Supplement: Figure S1 — The alignment, saved under the Philip format, was performed as described in Materials and Methods with the introduction of gaps (-) to maximize the alignments. The LmSIDER names indicate the chromosomal localization followed by the model number. (1.6 MB DOC) [file ppat.0030136.sg001.doc]

1013 1639
24.00477  CCCT-G----ATGG--C-----------------------------AGAG
36.01076  CCCT-G----ATGA--C---------------------------------
29.00524  CTCT-G----AAGA--C---------------------------------
35.01090  CCCT-G----ATGA--C---------------------------------
31.00641  CCCA-G----ATGA--C---------------------------------
33.00760  CCCG-G----ACGA--T---------------------------------
36.01128  CCCT-T----TTGA--T---------------------------------
36.01087  CCGT-G----ATGA--C---------------------------------
35.01074  GCCTCG----CTGA--C---------------------------------
34.00878  CCCT-G----ATGA-GC--------------------------------G
31.00653  CCCT-G----AGTC--C---------------------------------
25.00573  CACT-G----ACGG--C---------------GGATGGGGTGGTGGTGGG
38.00225  CCGG-G----GGGG--G---------------------------------
34.00863  CCCT-C----TTGATGC-------------------------CGGGGGGA
14.00386  CCCT-G----ATGA--C---GACGCTGTGTGTACGTGCGCATGTGTTTGT
14.00378  CCCG-G----ATGC--C-------------------------GGGGCAGG
28.00581  CCCTCTC---ATGATGC---------------------------------
37.00279  CCGT-G----ATGA--C---------------------------GGGGAG
37.00280  CCGT-G----ATGA--C---------------------------------
37.00282  CCCGCG----ATGA--C---------------------------------
37.00283  CCCC-A----ATGA--C---------------------------------
37.00285  TACT-G----ATGA--C----------------------------GAATG
37.00286  CCCTTG----ATGA--C-------------------------------GG
37.00287  CACG-G----ATGA--C---------------------------------
37.00284  TGCTCA----ATCA--C---------------------ATACGTGTATCG
38.00224  CCGT-G----ATAA--C--------------------------TGGGGGG
38.00228  TCCG-G----ATGA--A--------------------GGGCATGGAAAGA
38.00229  --------------------------------------------------
38.00230  TCCG-G----GTGA--C-------------------------GAGGTGAG
38.00231  CCCG-G----GTGA--C-------------------------GAGGTGAG
39.00295  CCTT-G----ATGA--C------------------------------GGC
39.00297  TCCA-G----ATG-------------------------------------
39.00299  CCCT-C----ATGA--C---------------------------------
39.00298  GCTT-GG---ATCT--C---------------------------CAAATG
04.00427  CCGT-G----ATGA--C---------------------------------
04.00428  CCCT-G----ATGA--C---------------------------------
04.00420  TTGTCG----AGGG--C--------------------------------A
04.00422  CCCG-G----GTGA--C--------------------GGGTGGGGGGCAG
04.00424  CCCG-G----GTGA--C--------------------GGGTGGGGGGCAG
04.00425  CCCG-A----ACGA--C---------------------------GGGTGG
04.00426  CCCG-A----ACGA--C--------------------------GGGTGGG
04.00419  CGCT-G----ACG---C---------------------------------
04.00416  CCCT-G----ATGA--C---------------------------------
04.00417  CCCT-G----ATGA--C---------------------------------
04.00418  CCCA-G----ATGA--C---------------------------------
05.00335  CCCT-G----GTGA--C---------------------------------
05.00336  CTCT-GG---AATA--C------------------------------TGG
05.00340  CCCT-G----ATGG-GC-------------------------------GC
05.00346  CCCT-G----ATGA--C---------------------------------
05.00347  CCGT-A----AAGT--C---------------------------------
05.00349  CCCT-C----ATGA--C---------------------------------
05.00350  CCCT-C----ATGA--C---------------------------------
05.00352  CTCT-G----ATGA--C---------------------------------
05.00337  GACT-GG---ATGA--C------------------------------GGG
05.00344  CCCT-G----ATAA--C-----------------------------GAGA
05.00353  AACT-G----ATGA--C---------------------------------
05.00338  TC-T-GG---ATGA--C------------------------------GGG
06.00296  CCCC-G----ATGA--C---------------------------------
06.00298  CTTT-G----ATGA--C---------------------------------
06.00302  CCCG-G----ATGA--A---------------------------------
06.00308  TCTTCG----ATGA--C----------------------GTGGGGTGGGG
06.00311  CCAT-G----ATGA--C---------------------------------
06.00314  CCCT-T----CTGT--T---------------------------------
06.00315  CCAT-G----ATGA--C---------------------------------
06.00312  CTCT-G----ATGG--C---------------------------------
06.00313  CCCT-G----ATGG--T---------------------------------
06.00303  GCCTCG----ATGA--C---------------------------------
06.00305  GCCTCG----ATGA--C---------------------------------
06.00307  CGCA-GG---TAGA------------------------------------
06.00316  CCAT-G----ATGA--C---------------------------------
06.00317  CGCG-G----ATGAAGC-GTGCTCATTCATGGGCTTTCAGTTCTGTGCTG
06.00318  CCCT-TC---ATGA--T---------------------------------
06.00319  TCCT-G----ATGT--A---------------------------------
07.00411  CCCT-C----ATGA--C---------------------------------
07.00414  CTCG-G----GTGA--A---------------------------------
07.00420  CTCT-GG---ATCA--T------------------------------GTT
07.00426  TGCT-G----ATGA--C---------------------------GTTTTT
07.00427  GCCT-AC---GCGA--T------------------------GGCCTCTGG
07.00428  GCCT-G----ATCA--T---------------------------------
07.00429  ACCG-G----GAGA--T------------------------------AAG
07.00430  CACGCG----ATGA--G---------------------------------
07.00431  CCCG-G----CTGC--C------------------------------AAG
07.00406  TCCT------ATGA--G---------------------------GGCCTC
07.00407  CCCT-C----ATGA--C---------------------------------
07.00408  CCCC-C----ATGA--C---------------------------------
07.00409  CTCT-C----ATGG--T---------------------------------
07.00410  CGCT-G----ATGG--C-------------------------GTCCGGCG
07.00412  CTCA-G----GTGA--C-------------------------GTCGGAGG
07.00413  CTCA-G----GTGA--C----------------------------GTCGG
07.00417  CCCG-G----GTGA--C-----------------------------GTTG
07.00421  CCCT-G----CACA--C-----------------------------TCCA
08.00368  CCCTTG----ATGA--C---------------------------------
08.00372  CGCT-G----ATCA--T-------------------GGAGGACGAAGGGA
08.00377  GGAG-A----GTGA-GC--------------------------------G
08.00403  CCGT-G----GTGA--C---------------------------------
08.00405  CCCT-G----GTGA--C---------------------------------
08.00396  --------------------------------------------------
08.00397  CCGT-G----ATGG--C---------------------------------
08.00398  CACT-T----ATGA--C---------------------------------
08.00399  CTCT-G----ACGA--C---------------------------------
08.00400  CCCT-TC---TTGA--C---------------------------------
08.00401  GCCTATC---ATGA--G---------------------------------
08.00402  CCCT-TC---ATGA--C---------------------------------
08.00404  CCCT-G----GTGA--C---------------------------------
09.00351  CCCT-GGTA-ATGA--C---------------------------------
09.00353  CCCT-C----ATGA--C--------------------------AAGCAGG
09.00354  CCCT-C----ATGA--C--------------------------AAGCAGG
09.00357  CCCC-G----ATGA--C---------------------------------
09.00358  TCCT-GAGCGGTGA-ACACACACACACACACACACACACACATATATATA
09.00360  TCCT-GCCC-ACGAGGC----------------------------AGACC
09.00362  CCCT-G----ATGA--C---------------------------------
09.00363  CCTT-G----ATGA--C---------------------------------
09.00364  CCCT------CTGA--T------------------------------GGC
09.00365  CTCT------TTGA--T---------------------------------
09.00366  CTCT-G----ATGA--C---------------------------------
09.00367  CTCT-G----ATGA--C------------------------------GGG
09.00369  TGCT-T----CTCA--T----------------------------GACAG
09.00371  TCCC-G----CTGA--T--------------------------------G
09.00368  CCAT-C----ATGA--C-------------------GATGGGGGCGAAGG
09.00355  CCCT-C----ATGA--C------------------------GGAGAAGGG
09.00359  ACGT-G----AACA--G---------------------------------
10.00447  GCCT-C----ATGA--C---------------------------------
10.00448  TCCT-C----ATGA--T---------------------------------
10.00451  CCCC-G----ATGAAAC---------------------------------
10.00452  CCCC-G----ATGAAAC---------------------------------
10.00454  CCCTTG----ATGA--C---------------------------------
10.00458  CCCTTG----ATGA--C---------------------------------
10.00459  TCCT-G-----TGA--A---------------------------------
10.00450  CCC--G----GCG---C---------------------------------
10.00455  CCCTTG----ATGA--C---------------------------------
10.00456  CCCTTG----ATGA--C---------------------------------
10.00457  CCCTTG----ATGA--C---------------------------------
10.00464  CCC--GAACCGTG---C----------------------------TTGGT
10.00445  CCCC-G----CTGA--C---------------------------------
10.00449  TCCT-C----ATGA--T---------------------------------
10.00461  CCCT-C----ATGA--C---------------------------------
10.00463  TCTT-G----ACAT--T---------------------------------
10.00465  CCTT-G----ATGA--T---------------------------------
10.00466  GCCT-G----ATGA--C---------------------------------
10.00467  CCCT-G----CTGA--G---------------------------------
10.00468  CTCT-G----ATAA--T---------------------------------
10.00469  CCCC-G----CTGA--C---------------------------------
11.00327  CCCT-G----ATGA--C---------------------------------
11.00328  CCCT-G----ATGA--C---------------------------------
11.00329  CCCT-G----ATGA--C---------------------------------
11.00330  CCCT-G----ATGA--C---------------------------------
11.00332  CCCT-C----ATGA--C----------------------------GGCGG
11.00353  TCCT-G----ACAA--C---------------------------------
11.00354  TCCT-G----ACAA--C---------------------------------
11.00333  ACCTGG----ATGA--C---------------------------------
11.00335  CCC--G----GTTC--T---------------------------------
11.00336  CCCT-G----ATGG--T---------------------------------
11.00337  CCCT-G----ATGA--C---------------------------------
11.00338  CCGC-G----ATAA--C---------------------------------
11.00339  CCCG-G----ATGG--C---------------------------------
11.00344  CCCG-G----ATGC--C-----------------------------AGGG
11.00345  CCCG-G----ATGC--C-----------------------------AGGG
11.00348  CGCT-G----ATGA--C---------------------------------
11.00349  CTCT-A----ATGA--T---------------------------------
11.00350  CTCT-G----ATGA--C---------------------------------
11.00351  CTCT-G----ATGA--T---------------------------------
11.00352  CCCT-G----ATGG--C---------------------------------
12.00409  ACGT-G----ACGATGC-----------------------------TGGT
12.00411  TCCT-G----ATAG--G---------------------------------
12.00388  CCCT-G----ATGA--C----------AGGGAGTGGAGAAGAGGAGTGGG
12.00390  CCCT-C----ATGA--C---------------------------------
12.00385  CCTT-C----ACGG--C-------------------------------AG
12.00386  CCTT-C----ACGG--C-------------------------------AG
12.00392  CCCT-C----ATCA--C---------------------------------
12.00393  TGCG-G----CTGC--C---------------------------------
12.00396  CCCG-A----ATGA--T---------------------------------
12.00399  TCCC-G----ACGA--C---------------------------------
12.00401  GCCT-G----ATGA--C---------------------------------
12.00407  TGCT-G----GTGA--C---------------------------------
12.00405  TGCT-G----GTGA--C---------------------------------
12.00406  TACT-G----GTGA--C---------------------------------
12.00408  TGCT-G----GTGA--C---------------------------------
12.00404  TGCT-G----GTGA--C---------------------------------
12.00402  TGCT-G----GTGA--C---------------------------------
12.00403  TGCT-G----GTGA--C---------------------------------
12.00395  CTCT-G----CTGA--C---------------------------------
13.00439  CCCT-G----TTGG--C--------------------------------A
13.00426  CCC--G----ATGA--T---------------------------------
13.00429  CCC--G----ATGA--T---------------------------------
13.00430  CCC--G----ATGA--T---------------------------------
13.00442  CGCT-G----ATGA--C---------------------------------
13.00444  TCGT-G----CTGG--C--------------------------------A
13.00449  CCCG-G----ATGA--T---------------------------------
13.00432  ACCT-G----ATGA--C---------------------------------
13.00438  CCCT-G----TTGG--C------------------------------AGG
13.00446  CCCT-G----ATGA--C------------------------------CAC
13.00450  CCTT-G----ATGG--C---------------------------------
13.00451  CCC--G----ATGA--C------------------------------CAC
13.00452  TCCT-CCG--CTGC--C---------------------------------
13.00454  CCTT-C----ATGA--C---------------------------------
13.00455  CGCT-G----ACGG--C---------------------------------
14.00389  CCCT-G----ATGG--T---------------------------------
14.00370  CCCG-G----ACGA--C---------------------------------
14.00371  CCCG-G----ACGA--C---------------------------------
14.00372  CCCG-G----ACGA--C---------------------------------
14.00374  TCAG-C----ACGA--C---------------------------------
14.00385  CCC--G----ATGA--C---GACGCTGTGTGTACGTGCGCATGTGTATGT
14.00390  CCCT-C----AGGG--C---------------------------------
14.00391  CCCA-C----AAAA--T---------------------------------
14.00357  CCCT-G----ATGA--C---------------------------------
14.00358  C-TT-GG---GTGA--C---------------------------------
14.00359  CCCT-C----ATGA--C---------------------------------
14.00360  CCCT-G----ATGA--G---------------------------------
14.00361  CCCT-C----ATGA--C---------------------------------
14.00362  TCCT-C----ATGA--C---------------------------------
14.00363  CCCT-G----ATGA--G---------------------------------
14.00364  CCCT-G----ATGA--G---------------------------------
14.00365  CCCT-C----ATGA--C---------------------------------
14.00367  CTCT-G----GTGA--A---------------------------------
14.00384  CCCT-G----ATGA--CAGTGTGTCTGTGTGTACGTGCGCATGTGTTTGT
14.00387  GCC--A----ATGA--C---GACGCTGTGTGTACGTGCGCATGTGTATGT
15.00413  CACT-C----GTGA--T---------------------------------
15.00414  TGCT-G----ATGA--C---------------------------------
15.00415  CACC-------TGA--T---------------------------------
15.00416  CACT-C----ATGA--C---------------------------------
15.00417  TACT-C----ATGA--C---------------------------------
15.00418  ACCT-G----ACGG--C--------------------------------G
15.00420  CCAT-G----GTCG--C--------------------------------G
15.00428  CCGT-A----ATGG--C---------------------------------
15.00430  CCGT-C----ATGG--C------------------------------ACT
15.00422  CCCT-C----GTGG--C------------------------ACAGGGAGG
15.00427  CGCT-C----ATCA--A---------------------------------
15.00433  TCCT-G----GTGAGAC---------------------------------
15.00434  TCCT-G----GTGAGAC---------------------------------
16.00320  CACC-GAT--ATGA--T-----------------------------GAGG
16.00321  CCCT-G----ATGC--C---------------------------------
16.00324  GCCT-G----ATGA--T---------------------------------
16.00339  CTCT-G----ATGA--C----------------GGGCGAGAAGGGGGCGG
16.00322  ACCT-G----ATGC-TC---------------------------------
16.00328  CCCG-G----GTGA--C---------------------------------
16.00329  CCTT-G----ACGA------------------------------------
16.00332  CCTT-G----ACGA------------------------------------
16.00333  CCCT-G----GTGA--C--------------------------------G
16.00334  --------------------------------------------------
16.00343  CCGT-A----GTGC--A--------------------------------G
16.00345  TCCT-G----GTGA--C---------------------------------
16.00346  CCCC-A----ATGA--C---------------------------------
16.00325  CCCT-GATG-ATGA--C---------------------------------
16.00341  ACCT-G----ATGA--T---------------------------------
17.00373  CCCG-G----ATCA--C---------------------------------
17.00375  CCCG-G----ATCA--C---------------------------------
17.00376  CCTG-C----CTGT--C---------------------------------
17.00377  TCAT-T----ATGA--C-------------GGAGATGGTGAGGTGAGCAG
17.00381  CCAT-G----ACGA--C----GTGGTGAAATGGTGAGGTGAGGTGAGCAG
17.00404  CTCT-G----A-GA--A---------------------------------
17.00406  CGC--G----ATGA--T------------------------------GAC
17.00407  CCTT-T----ATAA--C---------------------------------
17.00408  CCAT-G----ATGA--C---------------------------------
17.00410  CCAT-G----ATGA--C---------------------------------
17.00401  CCAT-G----ACGA--C-------------GACGACGACGGGGGGGGGGG
17.00379  CTCT-G----ATGG--C------------------------------GGG
17.00387  CCCT-G----AAGA--C---------------------------------
17.00388  CCCT-G----ATAG--C---------------------------------
17.00391  CCCT-G----ACGA--C---------------------------------
17.00390  CCCT-G----ATAG--C---------------------------------
17.00392  TTCT-G----CTGA--C---------------------------------
17.00393  CACT-G--A-AT-A--C---------------------------------
17.00394  CCCT-G----CTGA--C---------------------------------
17.00395  CCCT-G----ATAG--C---------------------------------
17.00389  CACACG----ATGA--G-------------------AGGTGCGTGTGTAT
17.00398  CCTT-G----ATGA------------------------------------
17.00378  CCCG-G----ATCA--C---------AGGAGGAGACGGTGAGGTGAGCAG
18.00507  CCCT-G----ATGA--C---------------------------GGGGGG
18.00518  CCCT-A----ATGA--C--------------------------------A
18.00522  CCCA-G----GTGT--A-----------------TGCTCCCTCTCCCACA
18.00486  CCCT-C----ATGA--G-------------------------------AG
18.00491  CTCT-G----ATGA--C---------------------------------
18.00501  CCCT-C----GTGA--G-------------------------------AG
18.00479  CACT-C----ATGA--C-------------------------------AG
18.00481  CTTT-C----ATGA--C-------------------------------AA
18.00485  CCCT-C----AAGA--C-------------------------------AG
18.00487  CCCT-C----ACAA--C-------------------------------AG
18.00489  CCCT-C----ACGA--C-------------------------------AG
18.00513  CCCT-G----ATGA------------------------------------
18.00517  ACCA-GCA--GTGA--C---------------------------------
18.00520  CCCT-TC---TTGA--C---------------------------------
18.00521  ACAT-GTG--ATGA--A---------------------------------
18.00528  CCCT-G----TCGA--C---------------------------------
18.00529  CCCT-G----TCGA--C---------------------------------
18.00530  CTCT-G----GCGA--C---------------------------------
18.00477  CACT-C----ATGA--C-------------------------------AG
18.00496  GCCT-G----ATGA------------------------------------
18.00497  CATT-G----ACGA--C---------------------------------
40.00373  CCCG-G----ATGA--C-------------------------------GG
40.00374  CCCG-G----ATGG--C---------------------------------
40.00376  GTCG-G----ATTA--C-------------------------------GG
40.00377  CCCG-G----ATGG--C---------------------------------
40.00395  CCCC-C----ATGA--C------------------------------GAT
40.00396  CTCG-G----ACGA--C---------------------------------
40.00399  CTCG-G----ATGA--C---------------------------------
40.00400  CCTT-C----ATGA--C-------------------------------AG
40.00415  AACT-G----ATGA--C---------------------------------
40.00401  CCCT-G----GTGA--C------------------------------GGA
40.00404  CCGT-G----GTGA--C---------------------------------
40.00365  CCCT-G----ATGG--C------------------------------GGT
40.00366  CCCT-G----ATGG--C------------------------------GGT
40.00367  CCCC-G----ATAA------------------------------------
40.00368  CCCT-G----ATGA--C---------------------------------
40.00370  CCCT-G----ATGA--C---------------------------------
40.00371  CCCC-G----ATGA--G--------------------------------G
40.00387  TTCT-G----GTGG--C---------------------------------
40.00381  TCCT-C----ATGG--C---------------------------------
40.00383  TCCT-G----GTGG--C---------------------------------
40.00385  CCCC-G----GTGG--C---------------------------------
40.00386  CCCC-G----GTGG--C---------------------------------
40.00406  CCCTCTA---CTGG--C---------------------------------
40.00407  CCCTTAATG-ATGA--C-------------------GGAGGAGGTGAGAA
40.00408  CCCC-G----CTGA--C--------------------------------G
40.00409  CCCT-G----ATGA--C--------------------------------G
40.00410  CCCT-G----ATGA--C--------------------------------G
40.00411  CCCT-G----ATGA--C--------------------------------G
20.00405  CCTT-G----ATGG--C-------------------------------AG
20.00406  CCGT-C----ATGG--C---------------------------------
20.00408  CTCC-G----AGTC--C-----------------------------GTCA
20.00410  CCGT-C----ATGG--C---------------------------------
20.00414  CCCT-C----ACGA--C---------------------------------
20.00418  TCTC-G----ATGA--C---------------------------------
20.00420  CCCT-G----ATGA--C---------------------------------
20.00404  CCTT-G----CTGA--C----------------------------CAAAG
20.00411  TCAT-C----ACGG--C---------------------------------
20.00399  CCCG-G----ATGA--C---------------------------------
20.00401  CCAT-G----ATGA--C---------------------------------
20.00421  CCAC-A----ATGA--C---------------------------GAGAAG
20.00423  TCCC-G----ATGG--A---------------------------------
20.00424  CCCT-G----ATGA--C-------------------------------GG
20.00428  CTAT-G----ACGA--C---------------------------------
20.00429  CCCT-C----ATGA--C---------------------------------
20.00430  CCCT-C----ATGA--C---------------------------------
20.00400  CCCG-G----ATGA--C---------------------------------
20.00425  CTCT-G----ATGA--C---------------------------------
20.00432  CCCT-C----GTGA--T---------------------------------
20.00437  CTCT-G----ATGA--C---------------------------------
21.00346  CCCT-G----ATGC--C---------------------------------
21.00349  CCGT-G----ATGA--C--------------------GGGCGAAGGTGAA
21.00351  CAGT-G----ATGA--C------------------------TCGGGAACC
21.00350  CCCTTC----ATGA--C---------------------------------
21.00352  CCGT-G----ATGG--C------------------------------GGG
21.00353  CCCT-G----ATGA--C--------------------------TGGTGAA
21.00354  CCCT-G----ATGA--C---------------------------------
21.00365  CCCA-G----ATGA--T------------------------------GAC
21.00366  TTCT-G----ATGA--C---------------------------------
21.00368  CCCA-G----ATGA--T---------------------------------
21.00369  TCCT-G----ATGA--T------------------------------GAC
21.00370  TCCT-G----ATGA--T------------------------------GAC
21.00371  TCCT-G----ATGA--T------------------------------GAC
21.00373  CCCTTT----ATGA--T---------------------------------
21.00355  GCCT-T----TCGA--C---------------------------------
21.00356  --------------------------------------------------
21.00358  ACCT-G----ATGA--C-------------------------------AG
21.00359  AACA-T----GTGA--A-------------------------GGTGAAGG
21.00374  --------------------------------------------------
21.00376  CTCT-G----ATGA--C---------------------------------
21.00377  CCCT-G----ATGA--T---------------------------------
21.00378  CCCT-G----ATGA--T---------------------------------
21.00345  CCCT-G----ATGG--C---------------------------------
21.00348  CCAT-G----ATGA--C---------------------------------
21.00357  CCTT-G----ATAA--C---------------------------------
22.00426  CCCC-C----ATGA--C------------------------------GGG
22.00427  CCCT-C----GTGA--C------------------------------GGG
22.00429  CCCT-C----GTGA--C------------------------------GGG
22.00447  CCCTCT----TTAG--C--------------------------------G
22.00464  ACCC-T----ATGA--C---------------------------------
22.00422  CCCT-C----GTAA--C--------------------------------G
22.00455  CCCT-G----AAGA--C---------------------------------
22.00456  CCCT-G----AAGA--C---------------------------------
22.00458  CCCT-G----AAGA--C---------------------------------
22.00463  CCCG-G----AAAA--C---------------------------------
22.00465  CCCT-A----ATGA--C---------------------------------
22.00466  CCCT-G----ATGA--C---------------------------------
22.00468  CCGT-G----ATGG--T---------------------------------
22.00419  TCCT-G----ATGT--A---------------------------------
22.00420  CCCT-G----ATGA--C-------------------------------GG
22.00424  CCAT-C----ATCA--C---------------------------------
22.00432  CCCTTC----ATGA--C--------------------------GGAGAGG
22.00436  TCTT-G----ACGT--C----------------------AGTAATGGCGT
22.00438  CCCT-C----ATGA--C-------------------------------AG
22.00440  CCCT-G----AGAA--C---------------------------------
22.00441  TCCT-ATC--ATGG--C---------------------------------
22.00446  CCCTTC----ATGA--C--------------------------GGAGAGG
22.00449  CCCT-GTCG-ACGA--T---------------------------------
23.00376  CTCT-G----ATGG--T---------------------------------
23.00339  CCTC-G----ATGA--C---------------------------------
21.00360  TCCT-G----CTGA--C---------------------------------
23.00344  CCCT-C----GTGA--C---------------------------------
23.00352  CTCT-C----ATGA--C---------------------------------
23.00369  TCCG-G----ATGA--C---------------------------------
23.00370  TCCG-G----ATGA--C---------------------------------
23.00372  CCCG-G----ATGA--C---------------------------------
23.00373  CCCC-G----ACAA--C---------------------------------
23.00374  CCCC-G----ACAA--C---------------------------------
23.00323  GCCA-G----GGAA--C---------GTACGGGGGTAACAGTGCGTCGTT
23.00331  CCCT-G----ATGA--C---------------------------------
23.00333  CCCT-G----ATGA--C---------------------------------
23.00335  GCTT-G----ATGA--C---------------------------------
23.00336  CCCTTG----ATGA--C---------------------------------
23.00338  CCCTCTC---ATGA--C---------------------------------
21.00361  CTCT-G----AAGG--C---------------------------------
21.00362  CCCT-G----TTTT------------------------------------
23.00345  TCCC-G----ATGA--C---------------------------------
23.00348  CCCT-C----ATGA--C---------------------------------
23.00349  CCCA-G----ATGA--T---------------------------------
23.00350  CCCT-C----ATGA--C---------------------------------
23.00353  CTCT-C----ATGA--C---------------------------------
23.00354  GCCT-G----ATGC--T---------------------------------
23.00355  GCCT-G----ATGC--T---------------------------------
23.00360  GCCT-G----ATGG--C---------------------------------
23.00361  GCCT-G----ATGG--C---------------------------------
23.00362  CCCT-A----ATGA--C---------------------------------
23.00363  TTCT-GCG--ATTA--T---------------------------------
23.00364  TTCT-A----ATGA--T---------------------------------
23.00365  CCTT-G----ATGA--C---------------------------------
23.00366  CCCG-G----ATGA--C---------------------------------
23.00367  --------------------------------------------------
23.00357  CCCT-G----ATGA--C---------------------------------
24.00472  TCCG-G----ATGG--A---------------------------------
24.00481  CCCAACA---ATGA--G---------------------------------
24.00483  CCC--A----ATGG--C---------------------------------
24.00501  CAC--G----ATGG--C---------------------------------
24.00507  CCCT-G----ATCA-GC---------------------------------
24.00508  CCCT-G----ATCA-GC---------------------------------
24.00509  CCGC-G----ACGA--C---------------------------------
24.00510  CCGC-G----ACGA--C---------------------------------
24.00470  AACT-G----ATGA--C---------------------------------
24.00473  CCCT-C----GTGA--C---------------------------------
24.00474  CCCT-G----ATGG--C-----------------------------AGAG
24.00476  CCCT-G----ATGG--C-----------------------------AGAG
24.00494  CCCG-G----ATGA--C-----------------------------GGGG
24.00478  ACC--G----ATGG--C-----AGTGCCCGCTGCTCCGGCATTCGCTGCT
24.00480  CCC--G----CGGC-GC---------------------------------
24.00487  CCTC-C----ATCA--T-------------------------------GG
24.00488  CCCC-GC---ATGA--C---------------------------------
24.00489  CTCT-C----ACGG--C---------------------------------
24.00491  CCCT-G----ATGA--C---------------------------------
24.00492  CCCT-G----CTGT--C---------------------------------
24.00493  CTCT-C----ACGG--C---------------------------------
24.00499  CCCTTG----ATGA--C---------------------------------
24.00468  CCCT-C----ATGT--C---------------------------------
24.00469  CTGT-G----ATGG--A---------------------------------
24.00484  TCCT-G----ATGG--C---------------------------------
24.00485  TCCT-G----ACTA--C---------------------------------
24.00486  TCTT-G----ATGG--C---------------------------------
24.00502  ACCT-C----ATGATGC---------------------------------
24.00503  CCCC-G----ATAG--C-------------------------ACGGTGAG
24.00504  CACT-G----ATGA--C---------------------------------
24.00505  CACT-G----ATGA--C---------------------------------
24.00506  CCCTCG----ATGA--C---------------------------------
25.00545  CCCTTG----GTGA--C----------------------------AACGG
25.00558  TCCT-G----ATGA--C------------------------------AAG
25.00565  CCCG-G----ATGA--C--------------------------AAAGGCG
25.00566  CCCG-G----ATGA--C--------------------------AAAGGCG
25.00542  CCCTTG----ATGA--C----------------GGCGAGCCGATGTGTGT
25.00543  CCCTTG----ATGA--C--------------GGCGAGCCGATGTGTGTGT
25.00544  CCCTTG----ATGA--C--------------GGCGAGCCGATGTGTGTGT
25.00551  CCCT-G----ATCG--C---------------------------------
25.00552  GTCT-C----ACGA--A------------------------AGACAGGAG
25.00553  TCCT-G----CCGA--C------------------------------GGG
25.00559  ACC--G----ATG---C---------------------------------
25.00562  CCCT-G----AAGA--A-----------------------ATCGTTTTGG
25.00570  CCC--G----ATGA--A---------------------------------
25.00547  CCCT-G----ACGA--T--------------------------------G
25.00548  CTCC-G----ACGG--G---------------------------------
25.00549  CCCC-G----ATGA--C---------------------------------
25.00556  CTTG-G----ATGA--C-----------------------AGAGAGAGAG
25.00560  CCCT-G----ATGA--C---------------------------------
25.00561  CCTT-G----ACGA------------------------------------
25.00564  TTGG-G----ATGA--C-------------------------AGAGAGAG
25.00567  CCTG-G----ATGA--C-----------------------AACGGTGTGG
25.00569  TCTT-C----ATGA--C---------------------------------
25.00571  CCCT-C----ATGA--C---------------------------------
25.00572  CTCT-G----AAGA--C---------------------------------
25.00574  CACT-G----ACGG--C---------------GGATGGGGTGGTGGTGGG
26.00546  CCCT-C----ACGA--C---------------------------------
26.00549  CCCT-A----ACGA--C---------------------------------
26.00550  CCTT-G----AGGA--T---------------------------------
26.00551  ATCTCG-----TGA--C--------------------------------A
26.00552  CCC--G----ATGA--C---------------------------------
26.00554  CCGT-G----ACGA--G---------------------------------
26.00564  CCTT-C----ACGA--C---------------------------------
26.00524  CCCT-G----ATGA--C---------------------------------
26.00530  CGCA-G----ATGG-GC------------------------------AGG
26.00543  CCCT-G----ATGA--G---------------------------------
26.00560  CCCT-G----ATGA--A---------------------------------
26.00567  CCCT-C----AGTG--C---------------------------------
26.00569  CCCT-C----AGTG--C---------------------------------
26.00516  TTGT-GC---AGTA--C---------------------------------
26.00517  CTCGCG----ATGA--T---------------------------------
26.00518  CCCTTG-----TGA--T---------------------------------
26.00520  CCCTTG-----TGA--C---------------------------------
26.00523  CTGT-G----ATGA--A---------------------------------
26.00526  CCAT-C----ATGG--C---------------------------------
26.00527  CCAT-C----ATGG--C---------------------------------
26.00529  CCAT-C----ATGG--C---------------------------------
26.00531  CCCT-G----ATGA--C---------------------------------
26.00534  CTCT-G----ATGA--C--------------------------------G
26.00536  CCCTCA----CTGA--C---------------------------------
26.00538  CCCT-C----AAGA--C---------------------------------
26.00539  CTCTCG----GGGA------------------------------------
26.00540  CTCTCG----GGGA------------------------------------
26.00541  CTCTCG----GGGA------------------------------------
26.00544  CTGT-G----AAAA--A---------------------------------
26.00547  CCCT-C----ACGA--C---------------------------------
26.00545  CCCT-C----ACGA--C---------------------------------
26.00548  CCCT-C----ATGA--C-------------------------------AG
27.00526  CAAG-G----ATGG--C------------------------------ATG
27.00546  CCCT-G----ATGA--T---------------------------------
27.00541  CCCT-G----GTGA--T---------------------------------
27.00544  CCCT-G----ATGA--C----------------------------GGATG
27.00545  CCCT-G----ATGA--C----------------------------GGATG
27.00510  CCAT-T----CGGA--T------------------------AGCCGGTAA
27.00511  CCCG-G----ATGA--G---------------------------------
27.00512  CCCG-G----ATGA--G---------------------------------
27.00514  CCGTCT----AGGA--C---------------------------------
27.00515  CCCT-G----ATGA--G---------------------------------
27.00516  CCGTCG----AGGA--C---------------------------------
27.00519  CCCG-G----ATGA--T---------------------------------
27.00520  CCGTTT----AGGA--C---------------------------------
27.00522  ACTG-C----ATGA--T---------------------------------
27.00525  CCCG-G----ATAA--T---------------------------------
27.00536  CCAT-A----GTCA-GC---------------------------------
27.00538  TCCTGG----AGGA--C---------------------------------
27.00543  TCCG-G----ATGA--C----------------------------GGATG
27.00547  CCCG-G----GTGA--C------------------------------GAG
27.00489  CCCC-A----ATGA--C---------------------------------
27.00490  CCGT-C----ATCG------------------------------------
27.00491  ACCT-G----CTGA--C---------------------------------
27.00492  CCCT-C----ATGG--C---------------------------------
27.00493  CCCTCG-----TGA--G---------------------------------
27.00494  --------------------------------------------------
27.00495  CTTT-C----ATGA--C---------------------------------
27.00496  TGCT-G----GAGA--C--------------------------------T
27.00497  CCCTCG----GT-A--C---------------------------------
27.00498  CCCT-G----CTGA--C---------------------------------
27.00500  TCGT-G----ATGA--C---------------------------------
27.00501  CCCT-G----CTGA--C---------------------------------
27.00504  TCCA-G----ATGA--C---------------------------------
27.00507  CTGT-G----ACGA--T---------------------------------
27.00527  CCCG-G----ATGA--A--------------------------TGCGAGT
27.00528  CCCG-G----ATGA--A-----------TGCGAGTGGGGGGGGTGGAGTG
27.00529  CAAA-A----ATGA--A---------------------------------
27.00533  CCCC-G----ATAA--C---------------------------------
28.00598  GCCT-G-----TGA--C---------------------GGGCCTGGGGTG
28.00602  CACG-T----ATGT--A------------------TGCATGTGTGTGTGT
28.00572  TCGT-G----ATGA--C-----------------------------GTGG
28.00583  CACT-C----ATGA--C---------------------------------
28.00604  CCCC-G----ATGA--C---------------------------AACGCG
28.00613  CCCC-G----ATC---C---------------------------------
28.00615  CCCT-G----ATGATGC---------------------------------
28.00616  CCCT-G----ATGATGC---------------------------------
28.00617  CCCT-C----ATGA--C---------------------------AGTGGG
28.00619  CCCT-C----ATGA--C---------------------------AGTGGG
28.00620  TCCT-G----ATGA------------------------------------
28.00574  CCCC-G----ATGC--C-------------------------------GT
28.00577  CCCT-C----ATGA--T---------------------------------
28.00578  TCCT-C----ATGATGC---------------------------------
28.00579  CTCT-C----ATGA--C---------------------------------
28.00580  TCCT-C----ATGATGC---------------------------------
28.00585  CCCG-G----ACGG--C----------------------------GCGGG
28.00586  CGCCAG-----TGA--A---------------------------------
28.00587  CCCC-GCAAAGGGA--C----------AGGAGGCGCGTAGGGGGGGGGGA
28.00588  CCTC-G----ATAC--C------------------------------GCT
28.00594  TCCT-G----ACAA--C---------------------------------
28.00599  CCCT-A----ATAG--C---------------------------------
28.00600  CCCT-A----ATAG--C---------------------------------
28.00601  CCCT-A----ATAG--C---------------------------------
28.00605  CCCT-G----AGTG-AC--------------------------------G
28.00607  CCCT-G----ATAA--C---------------------------------
28.00609  CCAT-G----ATGG-GC---------------------------------
28.00611  CCCT-G----ATAA--C---------------------------------
28.00612  CTCC-G----ATGA--C---------------------------AACGCG
29.00549  TTCT-G-----TGG--G---------------GTGGATGGATAAGTGAAG
29.00551  CCAT-G----ATGC--C--------------------------------A
29.00592  CGCTCG----ATGG--C----------------------------GAAAG
29.00528  CCAT-G----ATCA--T---------------------------------
29.00537  ACCT-C----ATGA--C-------------------------------GA
29.00540  CCCT-G----AAGG--C-------------------------------AG
29.00541  CCCC-G----ATGA--C---------------------------------
29.00542  TTCT-G----AAGA--G-----------------------------AAGG
29.00544  TAAT-C----AGGA--G---------------------------------
29.00545  CCCT-T----AAGG--C-------------------------------AG
29.00546  TCCT-C----ATGA--C-------------------------CGGGGGTG
29.00547  TTCTCG----ACGA--C---------------------------------
29.00566  CCCA-G----ATGA--A---------------------------------
29.00567  CGCT-G----GTGA--C---------------------------------
29.00568  TTCT-G----ATGA--C---------------------------------
29.00569  CGCTCG----ATGA--T--------------------------------G
29.00581  AATT-G----GTGA--T---------------------------------
29.00583  CCCT-G----GTGA--C---------------------------------
29.00584  TCCT-G----ACGA--C---------------------------------
29.00588  AATT-G----GTGA--C---------------------------------
29.00590  CCGC-G----A-GA--G-------AGGCGAGAGAGAGAGACAACGAGGAA
29.00595  CCCT-G----ATGA--C---------------------------------
29.00597  CCGT-G----ATGA--C---------------------------------
29.00600  CCCT-A----CTGA--C---------------------------------
29.00601  GCCTCA----ATTA--C---------------------------------
29.00602  CCCC-G----ATGA--C---------------------------------
29.00525  CCCT-C----CGTG--C---------------------------------
29.00527  CCCT-C----CGTG--C---------------------------------
29.00529  CCAT-G----ATCA--T---------------------------------
29.00530  CCAT-G----ATCA--C---------------------------------
29.00533  CCCTTG----ATGG--G---------------------------------
29.00553  CTCT-G----ATGA--C---------------------------------
29.00565  CCCA-C----ATGA--T---------------------------------
29.00571  CCCT-G----ATGA--C---------------------------------
29.00576  CCCA-G-----TCA--C---------------------------------
29.00578  CCCA-G-----TCA--C---------------------------------
29.00580  --------------------------------------------------
29.00591  CCCG-G----ACGA--T---------------------------------
29.00593  CCCC-G----ATGG--T---------------------------------
29.00596  CCCT-G----ATGG--C---------------------------------
29.00598  CCC--G----GTGAAGC--------------------------------G
29.00599  CACG-G----ACGA--C---------------------------------
29.00606  CCCC-G----CTCA--C---------------------------------
29.00607  CCCC-G----CTCA--C---------------------------------
29.00609  CCCC-G----CTCA--C---------------------------------
30.00569  TCCG-G----ATGG--C---------------------------------
30.00576  TCCT-G----ATGA--C---------------------------------
30.00586  ACCT-G----ACGA--C---------------------------------
30.00587  GCCT-C----ATCA--C---------------------------------
30.00588  CCCT-G----ATGA--T---------------------------------
30.00589  CCCT-G----ATGA--T---------------------------------
30.00590  CCCT-G----ATGA--T---------------------------------
30.00591  CCCT-G----ATGA--T---------------------------------
30.00592  CCCT-G----ATGA--T---------------------------------
30.00593  CCCT-G----ATGA--T---------------------------------
30.00599  TACT-G----ATGC--C---------------------------------
30.00600  CCCT-A----ATGA--G---------------------------------
30.00607  TCCT-A----ATGA--G---------------------------------
30.00612  CACT-G----ATGC--C---------------------------------
30.00558  CCCTGG----ATGA--C---------------------------------
30.00559  CCCTGG----ATGA--C---------------------------------
30.00571  CGCC-G----ATGC-AC---------------------------------
30.00573  TCCG-G----ATGA--C------------------------------TCT
30.00574  CCCG-C----TTGA--C------------------------------GCA
30.00575  CCCG-G----ATGA--C------------------------------TCT
30.00578  CCCT-G----ATGA--T---------------------------------
30.00594  CCTT-G----TCAG--T---------------------------------
30.00596  CCC--G----ATGA--C---------------------------------
30.00597  CCAT-C----ATGA--C---------------------------------
30.00598  CCCT-G----ATGC--C---------------------------------
30.00602  ACC--G----TTTT--T---------------------------------
30.00604  CCCT-A----ACGA--G--------------------------------A
30.00605  CCCT-A----ACGA--G--------------------------------A
30.00608  CCCC-G----TAG---C---------------------------------
30.00613  GCCT-G----AAGA--A---------------------------------
30.00621  GCCT-G----ATGG--C---------------------------------
30.00622  CTCT-G----ATGA--C---------------------------------
30.00556  CCCT-G----GCGA--T---------------------------------
30.00562  CCCA-G----ATGA--C---------------------------------
30.00563  CCCA-G----ATGA--C---------------------------------
30.00565  CCC--GA---ATGA--C---------------------------------
30.00566  ACCG-G----ATGA--C---------------------------------
30.00568  TCCG-G----ATGG--C---------------------------------
30.00570  GCCG-G----ATGA--C---------------------------------
30.00595  CCCT-G----GTGA--C---------------------------------
30.00619  TCCT-C----ATCA--C---------------------------------
30.00620  CCC--GC---GTGA--C---------------------------------
30.00625  CACT-G----ATGA--C---------------------------------
30.00626  CCCT-G----ATGA--C---------------------------------
30.00627  CCCT-G----ATGA--C---------------------------------
30.00630  CCTT-G----ATGA--C---------------------------------
30.00631  CCTT-G----ATGA--C---------------------------------
30.00632  CCCC-G----AGGG--C---------------------------------
30.00634  CTCC-G----AGGG--C---------------------------------
30.00636  CCTT-G----ATAA--C---------------------------------
30.00643  CCAT-G----ATGA--C---------------------------------
31.00645  CGCT-G----ACGA--C-------------------------GGAGGAGG
31.00646  CGCT-G----ACGA--C-------------------------CGAGGAGG
31.00657  CCCT-G----GGGA--C---------------------------------
31.00658  CCCTAG-----GGA--C---------------------------------
31.00659  CGCT-G----GTGA--C---------------------------------
31.00690  CCGT-A----ATCA--C---------------------------------
31.00695  GCCTCA----ACGC--A---------------------------------
31.00696  CAAT-C----ACGG--A--------------------------------C
31.00606  CCCTCG-----TGG--C---------------------------------
31.00621  CCCC-G----ATGA--T---------------------------------
31.00622  CCCC-G----ATGA--T---------------------------------
31.00623  CTCT-G----TAAG--C---------------------------------
31.00678  TCCTTG-----TGA--C---------------------------------
31.00679  CCTTCGT---GTGA--C---------------------------------
31.00618  CCCTCG-----TGA--A--------------------------------G
31.00632  CCCT-G----ATGA--C---------------------------------
31.00639  CAAA-T----ACAA--C---------------------------------
31.00642  CCCT------ACGA--C---------------------------------
31.00643  CCCT-G----ACAA--C----------------------------GGTGG
31.00650  ACTT-C----ATGA--T---------------------------------
31.00677  CCCTCG-----TGA--C------------------------------GTG
31.00684  ACCA-G----CGGA--T--------------------------------G
31.00685  ACCA-G----TGGA--T--------------------------------G
31.00688  CACG-G----AAGA--C---------------------------------
31.00698  CCCT-G----ATGG--C------------------------TGCTGAAGG
31.00701  CCCC-G----ATGG--C---------------------------------
31.00703  GCCTCA----ATGG--C---------------------------------
31.00707  TGCT-G----ATTG--A---------------------------------
31.00708  CACC-G----ATGG--G-------------------------------GT
31.00709  CAC--G----ATGG--G-------------------------------AT
31.00710  CCCT-G----ACAA--C---------------------------------
31.00610  TCCT-G----GTGA--C---------------------------------
31.00614  CCCA-G----ATAA--C---------------------------------
31.00616  CCCA-G----ATAA--C---------------------------------
31.00617  TCCT-G----ATGA--C---------------------------------
31.00626  TCCT-C----ATCCTGC------------------------------ATG
31.00634  CTCT-G----AGG---C--------GCTGGTGGCCTTCCATGTTTGCCAC
31.00637  CCAC-G----ACGA--A---------------------------------
31.00652  ATCT-C----ATAG--C---------------------------------
31.00654  CGAT-G----AGTC--C---------------------------------
31.00655  CCCT-G----ACGG--C---------------------------------
31.00656  CACA-G----AGCG--C---------------------------------
31.00662  GCCT-C----ATAA--G----------------------------AGGGG
31.00666  CCCC-G----ATGA--T---------------------------------
31.00665  CCCT-C----ATGA--C------------------------GGAAGGGGG
31.00668  CCCT-C----ATGA--C------------------------GGAAGGGGG
31.00671  CCCT-G----ACGA--C---------------------------------
31.00673  AGCT-G----ACGG--A-------------------------------GG
31.00675  TCAT-G----ATGA--G---------------------------------
31.00691  CCCT-G----ATGA--C--------------------------------G
31.00694  TCTT-C----ATGA-TC---------------------------------
31.00664  CACT-G----ATGG--T---------------------------------
32.00749  CCCG-G----ATGG--C------------------------AGAGGGAAG
32.00750  TCCT-G----ATG-------------------------------------
32.00752  TTCT-G----ATG-------------------------------------
32.00754  CCCTCG----ATCA--C---------------------------------
32.00755  CCCTCCC---ATGA--C---------------------------------
32.00768  TCCT-G----GTAA--C---------------------------------
32.00788  ACAT-A----CTGA--T---------------------------------
32.00730  GCTT-G----ATGA--A---------------------------------
32.00731  CCCG-G----AGGA--C---------------------------------
32.00737  TCCT-C----TTGA--C--------------------------------A
32.00738  CCCT-C----CTGA--C------------------GGGGGGGGGGTGGAG
32.00741  CCCT-C----CTGA--C---------------------GGGGG-GTGGAG
32.00745  CCCTGG----GTGA--C-----------------------------GGGG
32.00746  CCCCCG-----TCA--C---------------------------------
32.00756  CCCTTCCC--ATGA--C---------------------------------
32.00757  TCCT-G----ATGA--C---------------------------------
32.00761  CCCTTG----ATGA-AC----------------ACCGATAACAGGCGTGG
32.00769  CGCC-G----ATGA--A---------------------------------
32.00771  TATT-GC---ATGG--T---------------------------GGGGTG
32.00772  TTCT-C----ATGA--C---------------------------------
32.00773  CCAT-C----ATGA--C---------------------------------
32.00775  CTCT-T----ATCA--C----------------TGTGGTTTTTGTGGACA
32.00776  CCC--G----AAGG--C---------------------------------
32.00777  CCC--G----AAGG--C---------------------------------
32.00782  CCCT-G--TCAT----C---------------------------------
32.00783  CTCT-AG----TGA--C---------GTGTGGGTGGGTGGGTGGGGTGGG
32.00801  --------------------------------------------------
32.00803  AACT-G----ATGA--C---------------------------------
32.00724  TCCT-A----ACGA--T---------------------------------
32.00725  CACA-A----ATGA--C---------------------------------
32.00726  TCCA-A----ATGA--T---------------------------------
32.00727  GCTT-G----ATGA--T---------------------------------
32.00728  CCTT-G----ACGG--C-----------------------------AAGA
32.00729  CCCG-G----ATGA--C------------------------------GGG
32.00732  CCCT-G----CTGA--C---------------------------------
32.00735  CCCT-G----CTGA--C---------------------------------
32.00743  ACCT-G----AAAA--C---------------------------------
32.00758  GCCT-G----ATGA-GC-----------------------------TCCA
32.00760  CCCT-G----ATAA--G---------------------------------
32.00763  CCCT-G----GTGA--C---------------------------------
32.00764  CTCC-G----CTGA--C---------------------------------
32.00765  CTCC-G----CTGA--C---------------------------------
32.00766  CTCC-G----CTGA--C---------------------------------
32.00767  CCTT-G----GTGG--C---------------------------------
32.00779  CCC--GA---AGAA--C---------------------------------
32.00780  CCG--GA---ACGA--C---------------------------------
32.00787  CCCT------ACGCG-G----------------------------ATGTG
32.00790  CTGT-G----ATGA--C---------------------------------
32.00791  CTGT-G----ATGA--C---------------------------------
32.00794  CCCT-G----GTGA--T---------------------------------
32.00800  TCCTCG----ATGA--C---------------------------------
33.00728  CCCT-C----ATAA--C---------------------------------
33.00744  CCCT-G----ATGG--C---------------------------------
33.00770  CCCT-G----ATGG--T---------------------------------
33.00771  CACT-G-----TGA--T---------------------------------
33.00785  CTCT-C----ACAA--C--------------------------------G
33.00787  CCCT-C----ACAA--C--------------------------------G
33.00791  CCCG-C----ACGG--C---------------------------GTCGGG
33.00805  CCCT-G----ATGA--C---------------------------------
33.00798  GCCT-G----ATGG--C---------------------------------
33.00809  CCCT-C----ATGG--C---------------------------------
33.00714  CCCT-G----ATGA--T---------------------------------
33.00723  TCCT-C----ATGG--T---------------------------------
33.00726  CCGT-G----ACGG--C---------------------------------
33.00729  CCCTCG-----TGA--T---------------------------------
33.00730  CTTT-C----ATGA--C---------------------------------
33.00731  ACCC-G----ATGA--C---------------------------------
33.00733  CCCT-G----ATGA--C---------------------------------
33.00736  CTCT-G----ACGA--T------------------------------GGG
33.00745  CCCT-A----AGGA--C---------------------------------
33.00749  CCTT-G----GTGA--A---------------------------------
33.00768  CCCT-G----ATA-------------------------------------
33.00774  CCCT-G----ATG-------------------------------------
33.00788  CTCT-G---ACTG---T---------------------------------
33.00813  TTCA-T----ATGATGC---------------------------------
33.00716  CCCT-G----ATGA--T---------------------------------
33.00717  GCCT-C----ATGG--C------------------------------GCA
33.00718  ACCT-G----ATGA--T---------------------------------
33.00722  CAC--G----ATGA-TC---------------------------------
33.00737  --------------------------------------------------
33.00740  CACC-G----ACGA--C--------------------------------G
33.00741  CCCC-G----GTGA--C---------------------------------
33.00742  CACC-G----ACGA--C--------------------------------G
33.00746  CCCT-G----ATGG--G---------------------------------
33.00747  CCCC-G----ATGA--C-------------------------GAGGAGAA
33.00756  CCCT-G----ATGA--C---------------------------------
33.00759  CCCT-G----ATGA--C---------------------------------
33.00761  CCCTTG-----TAG--C---------------------------------
33.00762  CCCG-G----ATGA------------------------------------
33.00764  CCCT-G----ATGG--T---------------------------------
33.00766  CCTT-G----GCGA--C---------------------------------
33.00767  CCCT-G----ATAG--T---------------------------------
33.00769  CCGT-G----CTTA--A---------------------------------
33.00781  TACT-G----ATGA--C---------------------------------
33.00782  CCCTGG----ATGA--C---------------------------------
33.00783  CCCTGG----ATGA--C---------------------------------
33.00806  CCCT-G----ATGA--C---------------------------------
33.00812  CCCT-C----ATGA--C---------------------------------
33.00816  CCCT-C----ATGA--C---------------------------------
33.00734  CCCT-G----ATGA--C---------------------------------
33.00735  CCTT-A----CTGA--C--------GGTTTGTGTGTGTGTGTGTGTGTGT
33.00765  CCCG-G----ATGA------------------------------------
34.00789  CCCT-G----ATGA-TC------------------------ACGACTGGG
34.00791  TCCT-G----ACGA--C-----------------------------TGGG
34.00797  CCCT-G----ACGA--C---------------------------------
34.00864  CCTT-G----ACGA--C---------------------------------
34.00880  CCCTCG----ACGA--C---------------------------------
34.00896  TCCT-G----ATGA--T---------------------------------
34.00910  CCCC-G----ACGA--T---------------------------------
34.00898  TTCT-G----ACGA--C--------------------------------G
34.00752  TCTC-G----ACGA--C---------------------------------
34.00751  CATTCC----ACGA--C---------------------------------
34.00753  GTTT-C----ATGA--C---------------------------------
34.00754  CTCT-C----ATTA--C---------------------------------
34.00761  --------------------------------------------------
34.00762  CCGT-G---TTCGA--C---------------------------------
34.00776  CCTT-G----ATGA--C---------------------------------
34.00777  CGGT-G----ATGA--C---------------------------------
34.00779  CCTT-G----ATGA--C---------------------------------
34.00781  CCCT-G----CTCG--G---------------------------------
34.00782  GTCT-G----ATGC--C---------------------------------
34.00783  CCCTCG-----TGA--C-------------------------ACGAAAGG
34.00800  CCCG-G----ATGG--C--------------------------GGTGGAG
34.00851  CGTT-G----AAGG--G---------------------------------
34.00854  CCCT-G----ATGA--C----------------------GGGGGTGGGGG
34.00855  CCCC-G----ATGA--C---------------------------------
34.00859  CCTTCG-----TGA--C---------------------------GGGGAA
34.00860  CTCTCG----ATGC--C-----------------------------GGGG
34.00867  CCCT-G----ATCA--A----------------------------GGCAG
34.00869  TCTT-G----ATGA--C---------------------------------
34.00873  TCATCG----ATGA--C---------------------------------
34.00876  CCCT-G----ATGA-GC--------------------------------G
34.00877  TCCG-G----ATGA-GC--------------------------------G
34.00879  TCCG-G----ATGA-GC--------------------------------G
34.00893  CCCC-A----ATGA--T---------------------------------
34.00894  CCCC-G----ATGA--T---------------------------------
34.00895  CTCC-T----CTGA--C---------------------------------
34.00900  CTCT-G----ATGC--G---------------------------------
34.00904  TCCT-C----ATGG--C---------------------------------
34.00911  CCCT-C----ACGA--T------------------------------TGG
34.00755  CTCT-G----GTGA--T---------------------------------
34.00770  CCCT-G----ATAA--C---------------------------------
34.00771  TCCT-G----ATGG--C------------------------------GTG
34.00778  CTGC-G----GTTA--C---------------------------------
34.00786  CCGT-G----GTAA--C-------------------------------AG
34.00795  GCCT------CTTA--C----------------------CGGTGGTAAAG
34.00796  CCCT-C----ATGA--C---------------------------------
34.00798  CCCT-C----ATGA--C---------------------------------
34.00845  CCAT-G----ATGT--C----------CCACCGTCGCGGGTAGTAGGGGG
34.00856  CCTC-G----ATAA--C---------------------------------
34.00870  CATC-G----ATGA--C---------------------------------
34.00883  CCCT-A----ATGA--T---------------------------------
34.00886  CCGC-G----ATGA--C---------------------------------
34.00887  TCCTCCC---ATGA--C------------------------GGTGGTGAG
34.00888  CCCT-G----GTGA--C---------------------------------
34.00890  CTCC-G----ATAA--C------------------------AGTGGTGAG
34.00891  GTCA-G----ATGA--C------------------------GGTGGTGAG
34.00905  CCCC-G----ATGC--C------------------------------GGG
34.00906  ACCTCC----CTAG--A---------------------------------
34.00907  ACAT-C----ATGT--C---------------------------------
34.00912  TCTT-C----ACGA--C--------------------CCCTCACGATTGG
34.00914  CCTT-C----ACGA--G------------------------------GGG
34.00902  CTGT-G----ATTT--A---------------------------------
35.01077  CCCT-G----ATGC--C----------------------------GGGGG
35.01085  --------------------------------------------------
35.01089  CTCT-G----ATGA--C---------------------------------
35.01099  CCCT-G----ATGA--C-------------------------------AT
35.01100  CCCTTG----ATGA--C---------------------------------
35.01098  CCCTTG----ATGA--C---------------------------------
35.01116  CGCC-G----ATGA-TC------------------------------TTG
35.01123  CGCT-G----ACGG--C---------------------------------
35.01130  TTCT-A----TCGA--T---------------------------------
35.01132  AGCTCC----TCGA--C--------------------------------A
35.01171  CCCT-G----ATGA--C---------------------------------
35.01119  --------------------------------------------------
35.01080  CCATTG----ATGA--C---------------------------------
35.01084  CCAT-G----ATAA--C---------------------------------
35.01091  GCCT-C----ATGA--C---------------------------------
35.01102  CCTT-G----ATGA--C---------------------------------
35.01103  CCTT-G----ATGA--C---------------------------------
35.01104  CCCT-C----ATGA--C-------------------------------GA
35.01105  CTTT-C----ATGA--C---------------------------------
35.01107  CCTT-C----ACGA--C---------------------------------
35.01121  TCCT-A----ATGA-TC---------------------------------
35.01157  CCCT-G----CTGA--C-------------------------------GG
35.01160  CCCT-G----ATGG--C---------------------------------
35.01163  CCCT------TTGA--T------------------------------GGC
35.01180  ACC--G----GTGA-AC---------------------------------
35.01181  CCCT-G----ATGA--C---------------------------------
35.01065  CCCTTT----ATGA--C---------------------------------
35.01066  CCAC-G----ACAA--T---------------------------------
35.01067  CCCT-G----ATGA--C---------------------------------
35.01086  CCCT-G----ATGA--C---------------------------------
35.01088  CGCT-C----ATAA--C---------------------------------
35.01094  TCCT-G----ATCATGC---------------------------------
35.01095  TCCT-C----ATGA--C---------------------------------
35.01097  ACCT-G----ATGA--C---------------------------------
35.01106  CTCACG----ACGA--G---------------------------------
35.01111  CCCG-G----ATGA--C---------------------------------
35.01112  CCCT-G----ATGA--C---------------------------------
35.01114  CTCC-G----ATGA--C---------------------------------
35.01120  CCCT-G----ATGG--C---------------------------------
35.01126  TCAA-G----ATGA--C---------------------------------
35.01128  CCCT-G----ACAA--C---------------------------------
35.01137  CCCT-G----ATAG--A---------------------------------
35.01138  CTCC-A----CTGA--C---------------------------------
35.01139  CTCC-A----CTGA--C---------------------------------
35.01140  CCCG-A----ATGA--C---------------------------------
35.01141  --------------------------------------------------
35.01143  CCCT-A----ATGC--G---------------------------------
35.01146  CTCT-G----ATGC-TC---------------------------------
35.01147  TTGTAG-----TGA--C---------------------------------
35.01150  CCCT-G----TTGG--C---------------------------------
35.01151  TTGTAG-----TGA--C---------------------------------
35.01153  GCAG-G----ATGA--C---------------------------------
35.01154  CCCC-G----AT-A--C-------------------------------CG
35.01158  CCCT-G----ATGG--C---------------------------------
35.01165  CCC--G----TTGA--T------------------------------GGC
35.01168  CCCC------ATGA--T---------------AGATCCGCGACGGCTGAA
35.01169  CCCT------TTGA--T------------------------------GGC
35.01170  ATCA-C----AGCA--T---------------------------------
35.01173  CCGT-G----AGGA--C---------------------------------
35.01176  CTCTTG----ATGA--C---------------------------------
35.01177  CTCTTG----ATGA--C---------------------------------
35.01178  CTCTTG----ATGA--C---------------------------------
35.01179  GCCTCG-----TAA--T---------------------------------
35.01070  CCCT-G----ATGA--C---------------------------------
36.01030  CTCT-G----ATGA--C-------------------------CAGCGGAG
36.01031  CTCT-G----ATGA--C-------------------------CAGCGGAG
36.01035  CTCT-G----ATAG--C-------------------------CAGCGGAG
36.01036  ACATCG----ATTA-AC---------------------------------
36.01037  ACATCG----ATTA-AC---------------------------------
36.01050  CCCT-G----ATGA--C---------------------------------
36.01052  CCTT-C----ACCA--T---------------------------------
36.01069  CTCT-G----ACGA--C---------------------------------
36.01094  CCCT-T----CTGT--C------------------------------GGT
36.01103  TCAT-G----AC-AG-C---------------------------------
36.01132  CCCT-G----ATGA--C---------------------------------
36.01152  CCCT-G----ATGA--C---------------------------------
36.01153  TCCT-A----AATA--T--------------------------------G
36.01154  CCGT-T----TTCA--C---------------------------------
36.01109  CATT-G----ACGA--C---------------------------------
36.01129  ACCT-G----A-GAG-A-------------------AAAGGTCGTTATGG
36.01005  ACCT-G----ATGA--C---------------------------------
36.01006  GCGT-G----ATGA--C---------------------------------
36.01007  CCCT-G----ATGA--C---------------------------------
36.01019  CCCT-G----ATGA--C---------------------------------
36.01021  CCCT-G----ATGA--C---------------------------------
36.01028  CCCT-G----ATGA--C---------------------------------
36.01040  CCGT-G----ATGA--C---------------------------------
36.01042  CCGT-G----ATGA--C---------------------------------
36.01044  CCCT-G----ATGA--C---------------------------------
36.01045  ACCT-G----ATGA--C---------------------------------
36.01046  CCCA-C----ATGA--C---------------------------------
36.01048  CCCT-G----ATGA--C---------------------------------
36.01049  CACT-C----ATAA--G---------------------------------
36.01051  CACC-GA-G-TTGT--A-------------------------------TG
36.01054  CCCT-G----AAGA--T---------------------------------
36.01060  CTCT-C----ATGA--C---------------------------------
36.01061  CCCT-G----CTGA--C--------------------------------A
36.01064  CCCA-G-----TGA--T---------ATCGGACCTTGCTCTGCTCTCTCC
36.01066  CCGT-T----ATGA--C---------------------------------
36.01073  TGCTAG----CAGA--C-----------------GCATGAGACTCGGATA
36.01075  TCCT-G----ATGA--C---------------------------------
36.01077  CCTT-G----AGGT-GC---------------------------------
36.01088  CCGT-G----ATGA--C---------------------------------
36.01095  CCCT-G----ACGA--G---------------------------------
36.01098  CCCT-G----ATGA--C-----------------------------GAGA
36.01111  TTTT-G----ATGA--G---------------------------------
36.01113  CCC--G----ATGA--C---------------------------------
36.01114  CCCT-G----ATGA--C---------------------------------
36.01134  CTCT-G----CGG---C---------------------------------
36.01145  CCCT-G----ATGA--C---------------------------------
36.01149  CCCT-G----ATGA--C---------------------------------
36.01009  CGCTCG-----TGA------------------------------------
36.01013  TCATCGAAACATGA--C--------------------------------A
36.01070  CCCT-G----ATGA--C---------------------------------
36.01072  CTCT-G----ATGA--C---------------------------------
36.01080  CCCTCG-----TGA--C---------------------------------
36.01083  CCCT-G----ATGG--T---------------------------------
36.01084  CCCT-G----ATGG--T---------------------------------
36.01085  CTCC-T----TTG---C---------------------------------
36.01100  CCCT-T----ACAG--C---------------------------------
36.01102  TTCT-C----ACGG--C---------------------------------
36.01116  CACC-G----ATGA--C--------------------------------G
36.01119  CGCT-A----ACGA--C--------------------------------A
36.01122  CCCT-A----ATGA--A---------------------------------
36.01137  GCAT-G----ATGA--G---------------------------------
36.01138  CCCT-G----ATGA--C---------------------------------
28.00595  TCTT-G----ATGA--C---------------------------------
21.00364  CCCT-C----TGGA--T---------------------------------

GCGAGGG-------------------------------------------
--GGGGG-------------------------------------------
-AGAGGG-------------------------------------------
--GAGGA-------------------------------------------
-GGAGA--------------------------------------------
--GGGGG-------------------------------------------
--GAGAG-------------------------------------------
--GGGGA-------------------------------------------
GGGAGGG-------------------------------------------
CGGAAGG-------------------------------------------
-GGAGGG-------------------------------------------
AGGAGGG-------------------------------------------
CGGAGGG-------------------------------------------
GGGAGGG-----------------------------------GGGGAGGG
TTGAGGG-------------------------------------------
AGGAGGG-------------------------------------------
GCGGGGG-------------------------------------------
GTGAGGG-------------------------------------------
--GGGGG-------------------------------------------
--GGGGG-------------------------------------------
--GGGAT-------------------------------------------
ACGAGGC---------------------------------------GGTG
ATGACGG------------------------------------GGTGGTG
--GGGGT---------------------------------------GGTG
TTGTGGG-------------------------------GGTGGGGCGGCG
CGGAGGG-------------------------------------------
GTGAGGG-------------------------------------------
--------------------------------------------------
GGGAGGG-------------------------------------------
GGGAGGG-------------------------------------------
GCGAAGC-------------------------------------------
--G-GTT-------------------------------------------
-GGCGG--------------------------------------------
GCGTGGG-------------------------------------------
--GAGGG-------------------------------------------
--GAAGG-------------------------------------------
CGGATGG------------------------------TCTGTACATTGAG
GGGAGGG-------------------------------------------
GGGAGGG-------------------------------------------
GGGAGGG-------------------------------------------
GGGAGGG-------------------------------------------
-AGAGGG------------------------------------AGGACGC
--GATAA-------------------------------------------
--GATAA-------------------------------------------
--GTCGG-------------------------------------------
--GGGAG-------------------------------------------
GCGACGG-------------------------------------------
GGGAGGG-------------------------------------------
--GGGGG-------------------------------------------
-GGAGG--------------------------------------------
--GGGGT-------------------------------------------
--GGGGT-------------------------------------------
-AG-GGG-------------------------------------------
GCGACGG-------------------------------------------
GGGAGGG------------------------------------------G
--AGATG-------------------------------------------
GCGACGG-------------------------------------------
--GTGGG-------------------------------------------
--GTGGG-------------------------------------------
--G-GGG-------------------------------------------
TAGGGGG-----------------------------------------GA
--GTGGC-------------------------------------------
-GGCGCG-------------------------------------------
--GTGGC-------------------------------------------
-GGAGGG-------------------------------------------
-GGAGGG-------------------------------------------
--GTGGG-------------------------------------------
--GTGGG-------------------------------------------
--GTGGG----------------------------------ACGTGAGAC
--GTGGC-------------------------------------------
GCGAAGG-------------------------------------------
--GGTGG-------------------------------------------
--GGGGG-------------------------------------------
--GTGGG-------------------------------------------
--AGGCA-------------------------------------------
GGGAGGG-------------------------------------------
CGGAGGG-------------------------------------------
GGGAAGG-------------------------------------------
--GGGGA-------------------------------------------
AAGAGGG-------------------------------------------
--GATGG-------------------------------------------
AAGAGGG-------------------------------------------
TTGAAAG-------------------------------------------
--GTGGG-------------------------------------------
--GTGGG-------------------------------------------
--TTGCA-------------------------------------------
GGGAGGG-------------------------------------------
AGGAGGG-------------------------------------------
AGGAGGG-------------------------------------------
AGGAGGG-------------------------------------------
TGGAGTG-------------------------------------------
--AGGGG-------------------------------------------
AGGAGGG-------------------------------------------
GGGAGGA-------------------------------------------
--GGGGG-------------------------------------------
--GGGGG-------------------------------------------
--------------------------------------------------
CGGTCGG-------------------------------------------
---AGGG-------------------------------------------
---AGGG-------------------------------------------
ATAAGGG-------------------------------------------
-ATATGG-------------------------------------------
--GGGGG-------------------------------------------
--CGGGG-------------------------------------------
--AAGGG-------------------------------------------
GGGAGGG-------------------------------GGGGTGGGGGGA
GGGAGGG-------------------------------GGGGTGGGGGGA
--GAGGG-------------------------------------------
TACAGGC-------------------------------------------
TGGACAG-------------------------------------------
--GGGGG-------------------------------------------
GGGAGGG-------------------------------------------
AAGACAG------------------------------------------C
--GGGGC-------------------------------------------
GGGAGGG-------------------------------------------
AGGAGGG-------------------------------------------
AAGAGGG-------------------------------------------
GCAAGAG--------------------------------------AGCAC
GGGAGGG-------------------------------------------
GAGAGGG-------------------------------------------
--GCACA-------------------------------------------
--GGGGC-------------------------------------------
--GGCCT-------------------------------------------
-CG-G---------------------------------------------
-CG-G---------------------------------------------
--GAGGG-------------------------------------------
--GAGGG-------------------------------------------
--GGGGG-------------------------------------------
--GAGCG-----------------------------------------CG
--GAGGG-------------------------------------------
--GAGGG-------------------------------------------
--GAGGG-------------------------------------------
GCCAGG--------------------------------------------
-GTAGGG-------------------------------------------
--GGCCT-------------------------------------------
--GTATG-------------------------------------------
--GATAG-------------------------------------------
--GTGGG-------------------------------------------
--AGGGG-------------------------------------------
-GTAGGG-------------------------------------------
-TTTGGG-------------------------------------------
-GTAGGG-------------------------------------------
--GGGAC-------------------------------------------
--GGGAC-------------------------------------------
--GGGAC-------------------------------------------
--GAGAC-------------------------------------------
CTGAGGG-------------------------------------------
--GGGGA-------------------------------------------
--GGGGA-------------------------------------------
-GGAGGG-------------------------------------------
--GGGCG-------------------------------------------
--GAGGG-------------------------------------------
--GCGGG-------------------------------------------
--GAGGG-------------------------------------------
--GCGGG-------------------------------------------
AGGAGGG-------------------------------------------
AGGAGGG-------------------------------------------
--GAGGG-------------------------------------------
--GAGGG-------------------------------------------
--GAGGG-------------------------------------------
--GAGGG-------------------------------------------
--GAGGG-------------------------------------------
GACAGGG-------------------------------------------
--GAGGG-------------------------------GGCGGGGTTGGC
GGGAGGG-------------------------------------------
-ACAGGC-------------------------------------------
AGGAGGG-------------------------------------------
AGGAGGG-------------------------------------------
--GGGGG-----------------------------------AGGGAAGG
--GCGGT-------------------------------------------
--GAGGA-------------------------------------------
--GAGGG-------------------------------------------
--GCGGG-------------------------------------------
AGGGGGG-------------------------------------------
AGGGGGG-------------------------------------------
AGGGGGG-------------------------------------------
AGGGGGG-------------------------------------------
AGGGGGG-------------------------------------------
AGGGGGG-------------------------------------------
AGGGGGG-------------------------------------------
--GAGGA-------------------------------------------
GGGAGAG-------------------------------------------
-GGAGGG-------------------------------------------
-GGAGGG-------------------------------------------
-GGAGGG-------------------------------------------
--GTGGA-------------------------------------------
GGGATGG-------------------------------------------
--GCTAC-------------------------------------------
--GGGGA-------------------------------------------
GAGAGGA-------------------------------------------
GTGAGGG-------------------------------------------
--CGGCG-------------------------------------------
GTGAGGA-------------------------------------------
--G-----------------------------------------------
--AAGGG-------------------------------------------
--CAGTG---------------------------------------CAGT
--GACGC-------------------------------------------
--CTGGG-------------------------------------------
--CTGGG-------------------------------------------
--CTGGG-------------------------------------------
--CTGGG-------------------------------------------
TTGAGGG-------------------------------------------
--AAGGG-------------------------------------------
--GAGGG-------------------------------------------
--AAGGG-------------------------------------------
--AGGCG-------------------------------------------
CGGTAGA-------------------------------------------
TGGTGGA-------------------------------------------
CGGTAGA-------------------------------------------
CGGTAGA-------------------------------------------
TGGTGGA-------------------------------------------
TGGTGGA-------------------------------------------
CGGTAGA-------------------------------------------
--AAGGG-------------------------------------------
TTGAGGG-------------------------------------------
TTGAGGG-------------------------------------------
--GGGGC-------------------------------------------
--GGGGG-------------------------------------------
-GGCGGG-------------------------------------------
--GAAAA-------------------------------------------
AAGAAG--------------------------------------------
GGAAGGG-------------------------------------------
GGAAGGG-------------------------------------------
--GAGGG-------------------------------------------
CGGTGGG-------------------------------------------
AGGAGGG-------------------------------------------
--TGGCT------------------------------------------A
-GGAGTG-------------------------------------------
-GGAGTG-------------------------------------------
GGGAGGG-------------------------------------------
--ATGCG-------------------------------------------
--GACGA-------------------------------------------
GGGAGGG-------------------------------------------
--CACTG-------------------------------------------
TGGAGAG-------------------------------------------
--GAGGC-------------------------------------------
--GAGGC-------------------------------------------
GGGAGGG-------------------------------------------
--------------------------------------------------
CGGAGGA--------------------------------------AGACG
--TTGGG-------------------------------------------
--AACGG-------------------------------------------
--GAGGG-------------------------------------------
T-------------------------------------------------
AGGAGGA-------------------------------GACGGTGGGATG
AGGAGGA-------------------------------GACGGTGGGATG
--TGCGT-------------------------------------------
GGGAGGG-------------------------------------------
GGGAGGG-------------------------------------------
-TGCGAG-------------------------------------------
GAGAGGG-------------------------------------------
-GGAGGG-------------------------------------------
-GGCGGG----------------------------------GGCACAGAC
-GGCGGG----------------------------------GGCACAGAC
ATGAGGG-------------------------------------------
GGGAGGG-------------------------------------------
--GAGGC-------------------------------------------
--TGGGG-------------------------------------------
--GAGGC-------------------------------------------
--TGGGG-------------------------------------------
--GGAGA-------------------------------------------
--AACAT-------------------------------------------
--GAGGA-------------------------------------------
--TGGGG-------------------------------------------
GGGAGGG-------------------------------------------
--AAGGG-------------------------------------------
GGGAGGG-------------------------------------------
GGGAGGG-------------------------------------------
GGAAGGG-------------------------------------------
CACACGC------------------------------------------A
AGGAGGG-------------------------------------------
ATGAGCG-------------------------------------------
AGGAGGG-------------------------------------------
AGGAGGG-------------------------------------------
AGGAGGG-------------------------------------------
AGGAGGG-------------------------------------------
AGGAGGG-------------------------------------------
AGGAGGG-------------------------------------------
--GAGGG-------------------------------------------
--GATTG-------------------------------------------
--GGGGG-------------------------------------------
-GGAGGT-------------------------------------------
--GGGGG-------------------------------------------
--GGGGG-------------------------------------------
--GGGGG-------------------------------------------
AGGAGGG-------------------------------------------
--GATGG-------------------------------------------
-AGAGA--------------------------------------------
GAGAGGG-------------------------------------------
-ATCTGG-------------------------------------------
GGGAGGG-------------------------------------------
-ATCTGG-------------------------------------------
ATGGGGG-------------------------------------------
CGGAGG--------------------------------------------
CGGAGG--------------------------------------------
AAGAGGC-------------------------------------------
-AGATG--------------------------------------------
GTGAGGG-------------------------------------------
-GGAGG--------------------------------------------
GGGAGGG-------------------------------------------
GGGAGGG-------------------------------------------
--GGGGA-------------------------------------------
--GAGGT-------------------------------------------
---AGGG-------------------------------------------
ACAAGGG-------------------------------------------
--TTGGG-------------------------------------------
--ATGGG-------------------------------------------
--TTGGG-------------------------------------------
-ATAGGG-------------------------------------------
-ATAGGG-------------------------------------------
---AGGG-------------------------------------------
GAGAGGG-------------------------------------------
GGGAGGG-------------------------------------------
GGGAGGG-------------------------------------------
GGGAGGG-------------------------------------------
GGGAGGG-------------------------------------------
GGGACGG-------------------------------------------
--GGGGG-------------------------------------------
TGGCGGG-------------------------------------------
--GGGGG-------------------------------------------
--GGGGC-------------------------------------------
--AAGGG-------------------------------------------
--GGGGG-------------------------------------------
GGGAGGG-------------------------------------------
GCGAGGG-------------------------------------------
ACTGGGG-------------------------------------------
--GAGGC-------------------------------------------
GGGTGGG----------------------------------------GGG
--GTACG-------------------------------------------
GAAAGGG-------------------------------------------
--GAGGG-------------------------------------------
GCGTGGG-------------------------------------------
GCGTGGG-------------------------------------------
ACTGGGG-------------------------------------------
GCGTGGG-------------------------------------------
GTGTGGG-------------------------------------------
-ACAG---------------------------------------------
-GGAGA--------------------------------------------
GGTAGGG-------------------------------------------
CTGAGTG------------------------------------------C
--GAGAG-------------------------------------------
TGAAGGG-------------------------------------------
GGGAGGG-------------------------------------------
GGGAGGG-------------------------------------------
AGGTGGG-------------------------------------------
--GAGGG-------------------------------------------
--GACGC-------------------------------------------
AGGTGGG----------------------------------------GGA
AGGTGGG----------------------------------------GGA
AGGTGGG-------------------------------------------
--TGCCT----------------------------------GCCTTTACT
--TTCAG-------------------------------------------
--------------------------------------------------
GGGAGGG-------------------------------------------
GGGCGGG---------------------------------------ACAC
--------------------------------------------------
AGGAGGG-------------------------------------------
--GCGAG-------------------------------------------
--GCAAG-------------------------------------------
--GGAAA-------------------------------------------
--GAGGA-------------------------------------------
--GGGGA-------------------------------------------
AAGCGGG-------------------------------------------
AAGCGGG-------------------------------------------
AAGCGGG-------------------------------------------
GGGATGG-----------------------------------GTGGGTGG
--CAGAA-------------------------------------------
GGGAGGG-------------------------------------------
-GGCCGG-------------------------------------------
-GGCCGG-------------------------------------------
-GGCCGG-------------------------------------------
--GGGGG-------------------------------------------
-GGTGAG-------------------------------------------
-GGTGAG-------------------------------------------
-GGTGGG-------------------------------------------
--GGGGG-------------------------------------------
TGGAGGG-------------------------------------------
--AAGGG-------------------------------------------
AGGAGGG-------------------------------------------
GGGAGGG-------------------------------------------
GGGAGAG-------------------------------------------
--GAGCA-------------------------------------------
TGGTTG--------------------------------------------
AGGAGGG-------------------------------------------
--GATGC-------------------------------------------
--GTGGG-------------------------------------------
--GTGGG-------------------------------------------
--------------------------------------------------
--GGGGG-------------------------------------------
ACGGGGG-------------------------------------------
GGGAGGC-------------------------------------------
GGGAGGC-------------------------------------------
GGGAGGC-------------------------------------------
--GGGGG-------------------------------------------
--GGGGG-------------------------------------------
TGGAGAG-------------------------------------------
--GTGGG-------------------------------------------
--GTGGG-------------------------------------------
--GCGGG-------------------------------------------
--GCGGG-------------------------------------------
--GTGGG-------------------------------------------
--ATGAG-------------------------------------------
--TTGGG-------------------------------------------
-CGAGGT-------------------------------------------
--GGGGG-------------------------------------------
--GGGGG-------------------------------------------
ACGGGGG-------------------------------------------
ACGGGGG-------------------------------------------
--GCCGG-------------------------------------------
--GCCGG-------------------------------------------
--GAGGG-------------------------------------------
--GAGGG-------------------------------------------
--GAGGG-------------------------------------------
--GGGGG----------------------------------------ATT
--GGGTT-------------------------------------------
--GGGGG-------------------------------------------
GGTAGGG------------------------------------------G
--------------------------------------------------
-GGAG---------------------------------------------
--GTACG-------------------------------------------
GGGACAG-------------------------------------------
--AGGGC------------------------------------------G
--GTGAA------------------------GGCAATGTCGACTGCCACC
--G-GGG-------------------------------------------
--G-GGG-------------------------------------------
--GGGGG-------------------------------------------
--GGGGG-------------------------------------------
AAGAGGG-------------------------------------------
AAGAGGG-------------------------------------------
GCGAGGG-------------------------------------------
GCGAGGG-------------------------------------------
TGGAGGG------------------------------------GGGGGGG
TCGCGCG---------------------------------------GCAC
---GTCG-----------------------------------------CT
AAAAGGG-------------------------------------------
---AGGG-------------------------------------------
----GGG-------------------------------------------
--GTGGG-------------------------------------------
--GTGGG-------------------------------------------
--GTGAA-------------------------------------------
--GGGGG-------------------------------------------
AGGAGG--------------------------------------------
--GTTGG-------------------------------------------
--GAGGG----------------------------------------AGG
-GGAGGACATACATACATACACACACACACACACACACACACACACACAC
--ACTAG--------------CCATGTTCTCTCTTCTCCCTCCCCACCCC
-CG-G---------------------------------------------
TTGGGGG------------------------------ACACGCCTCACAC
--GGCGG-------------------------------------------
--GGCGG-------------------------------------------
--ACGGT-----------------------------GAGTTGGGAGGACA
AGAAGGG-------------------------------------------
GTTGGGG-------------------------------------------
TGGTGGG-------------------------------------------
TGGTGGG-------------------------------------------
GTGTGGG-------------------------------------------
GTGTGGG-------------------------------------------
GTGTGGG-------------------------------------------
--CGGGG-------------------------------------------
GAGAGGG-------------------------------------------
TGAAGGG-------------------------------------------
---TGGC-------------------------------------------
CGGTGGG-------------------------------------------
--AAGGG-------------------------------------------
GGGTGGG-------------------------------------------
--GTGGG-------------------------------------------
---TGGC-------------------------------------------
AGGAGGG-------------------------------------------
--AGGGG-------------------------------------------
--GAGAC-------------------------------------------
AGGAGGG-------------------------------------------
TGGTGGG-------------------------------------------
--TTGGG-------------------------------------------
--GTGAG-------------------------------------------
-GCAGG--------------------------------------------
AGGAGGG-------------------------------------------
--AACGT-------------------------------------------
--GGGCG-------------------------------------------
--GGGGG-------------------------------------------
GGGAGGA-------------------------------------------
--GTGGG-------------------------------------------
--GAGGG-------------------------------------------
AGGTGGG-------------------------------------------
---AGTG-------------------------------------------
CGGAGGT----------------------------------------GTG
-GGACAG-------------------------------------------
--GAGCG-------------------------------------------
--GCG---------------------------------------------
--GCG---------------------------------------------
--GGTGG-------------------------------------------
-GGAGAG-------------------------------------------
--GAACA-------------------------------------------
-GGAGAG-------------------------------------------
-GGAGAG-------------------------------------------
AAGAGGG--------------------------------GGTGGGTGGAC
AAGAGGG--------------------------------GGTGGGTGGAC
AAGAGGG--------------------------------GGTGGGTGGAC
-GGACG--------------------------------------------
GGGTGCG-------------------------------------------
GGGAGGG-------------------------------------------
--GGGGG-------------------------------------------
-GGAGGG-------------------------------------------
-GGAGGG-------------------------------------------
-GGAGGG-------------------------------------------
--GACTG-------------------------------------------
--AACGT-------------------------------------------
--AACGT-------------------------------------------
GGGAAGG-------------------------------------------
CGGAGGG-------------------------------------------
--GAGGG-------------------------------------------
--GAGGG-------------------------------------------
GGGAGGG-------------------------------------------
GGGAGGG-------------------------------------------
GGGAGGG-------------------------------------------
--GAGTG-------------------------------------------
--GAGTG-------------------------------------------
-GGAGTG-------------------------------------------
--GAGTG-------------------------------------------
-GGAGTG-------------------------------------------
-GGAGAC-------------------------------------------
-AGAGGG-------------------------------------------
-GGAGAC-------------------------------------------
--GGGGG-------------------------------------------
-TGTG---------------------------------------------
GGGACG--------------------------------------------
GGGAGGG-------------------------------------------
GTGAGGG-------------------------------------------
-AGAGGG-------------------------------------------
--GCGGG-------------------------------------------
CAGAGGG-------------------------------------------
-TGAGGG-------------------------------------------
--TGGGG-------------------------------------------
--------------------------------------------------
--GGGGG-------------------------------------------
TGGAAG--------------------------------------------
--------------------------------------------------
CAGAGGG-------------------------------------------
GAGAAGG-------------------------------------------
CAGAGGG-------------------------------------------
GGGAGTG-------------------------------------------
--GAGGT-------------------------------------------
GGGAGGG------------------------------------------G
AGGAGGG-------------------------------------------
--AATGC-------------------------------------------
--ATGGG-------------------------------------------
TAGAGTG-----------------------GCATTCAGCTCATGTTGTGC
GTGGGGG-------------------------------------------
GGGAGGG-------------------------------------------
ATGCGGG-------------------------------------------
GGGTGGG-------------------------------------------
--------------------------------------------------
-CG-G---------------------------------------------
-CG-G---------------------------------------------
GGGAGGG-------------------------------------------
GGGAGGG-------------------------------------------
--GAGGG-------------------------------------------
GCGAGGG-------------------------------------------
--GTGTT-------------------------------------------
--GCGGG-------------------------------------------
GCGCGGG-------------------------------------------
--GCGGG-------------------------------------------
GGGAGGG-------------------------------------------
---AG---------------------------------------------
AGGAGGG--------------------------------AGGGAGGGAGG
ATGACGG-------------------------------------------
--GGGGG-------------------------------------------
--GCGGG-------------------------------------------
--GCGGG-------------------------------------------
--GCGGG-------------------------------------------
GGGAGGG-------------------------------------------
--GGGGG-------------------------------------------
-----GG-------------------------------------------
--GGGGG-------------------------------------------
GGGTGGG-------------------------------------------
GGGAGGG-------------------------------------------
GCGAGGG-------------------------------------------
GGTAGGG-------------------------------------------
-GGAGG--------------------------------------------
AAGTGGG-------------------------------------------
GGGTGGG-------------------------------------------
--GAGGA-------------------------------------------
AAGAGGG-------------------------------------------
--GATGG-------------------------------------------
GGGTGGG-------------------------------------------
GTGAGGG-------------------------------------------
--ATCGG-------------------------------------------
GGGCGGG-------------------------------------------
--GGGGG-------------------------------------------
--GAGAG-------------------------------------------
GTGAGGG-------------------------------------------
-GGTGGG-------------------------------------------
-CG-GGG-------------------------------------------
-GGACGG-------------------------------------------
--GGGGG-------------------------------------------
TAGAGGA-------------------------------CAAGGAAGAGGC
-AGGGGG-------------------------------------------
-AGGGGG-------------------------------------------
AGGAAGA-------------------------------------------
-GGAGGG-------------------------------------------
-AGAGGG-------------------------------------------
--GGGAC-------------------------------------------
--GGGGC-------------------------------------------
-GGAGG--------------------------------------------
-GGAGG--------------------------------------------
GAGAGGG-------------------------------------------
-GGAGGG-------------------------------------------
GGGCGGG-------------------------------------------
CGGAGG--------------------------------------------
GGGAGG--------------------------------------------
GGGAGG--------------------------------------------
--------------------------------------------------
--GGCGG-------------------------------------------
--GGGGG-------------------------------------------
--GGGGG-------------------------------------------
GAGAGGG-------------------------------------------
--GAGGA-------------------------------------------
--GAGGA-------------------------------------------
--GAGGA-------------------------------------------
--GAGGA-------------------------------------------
ATGGGGG-------------------------------------------
--AGGTG-------------------------------------------
-AGGGGG-------------------------------------------
-AGGGGG-------------------------------------------
-GGTGGG-------------------------------------------
-GGTGGG-------------------------------------------
-GGTGGG-------------------------------------------
-GGTGGG-------------------------------------------
-GGTGGG-------------------------------------------
-GGTGGG-------------------------------------------
GGGAGGA-------------------------------------------
--GAGGG-------------------------------------------
--GAGGG-------------------------------------------
-AGAAGG---------------------------------------ACAC
-CGGGGG-------------------------------------------
-CGGGGG-------------------------------------------
----GGG-------------------------------------------
GAGAGGG-------------------------------------------
GAGAGGG-------------------------------------------
GAGAGGG-------------------------------------------
-GGTGGG-------------------------------------------
-TG-GGG-------------------------------------------
--GGGGC-------------------------------------------
--GGGGC-------------------------------------------
-GGAGGA-------------------------------------------
-GGCGGG-------------------------------------------
ACGAGGG-------------------------------------------
ACGAGGG-------------------------------------------
--GGGGG-------------------------------------------
--GCGGT-------------------------------------------
--GAGAG-------------------------------------------
GGGAGGC-------------------------------------------
--GAGAC-------------------------------------------
--GGGGG-------------------------------------------
--GGGGG-------------------------------------------
ATGGGGG-------------------------------------------
ATGGGGG-------------------------------------------
ATGGGGG-------------------------------------------
ATGGGGG-------------------------------------------
-AGTTGG-------------------------------------------
-TGGGGG-------------------------------------------
--GGGGG-------------------------------------------
GGGAGGC-------------------------------------------
GGGAGGC-------------------------------------------
GGGAGGC-------------------------------------------
GGGAGGC-------------------------------------------
GGGAGGC-------------------------------------------
-GGAGGG-------------------------------------------
-GGAGGG-------------------------------------------
-AGAGGG-------------------------------------------
-GGAGAA-------------------------------------------
AGGAGGG-------------------------------------------
AGGAGGG-------------------------------------------
GGAAGGG-------------------------------------------
-GGAGGG-------------------------------------------
---AGGG-------------------------------------------
--G-GGG-------------------------------------------
TTGAGGG-------------------------------------------
AGGAGGG-------------------------------------------
-GGCGG--------------------------------------------
--GAGGG-------------------------------------------
--GAGGG-------------------------------------------
--GGGGT-------------------------------------------
GCGAGGG-------------------------------------------
GCGAGGG-------------------------------------------
TGGGGGG-------------------------------------------
--GAAGG-------------------------------------------
GGGAGTG-------------------------------------------
GGGAGTG-------------------------------------------
AGGAGTG-------------------------------------------
-GGAGGG-------------------------------------------
GCGGGGG-------------------------------------------
GTGTGTG-------------------------------------------
GTGTGTG-------------------------------------------
-GGTCAG-------------------------------------------
GGGAGGG-------------------------------------------
--GAGAG-------------------------------------------
---AGGC-------------------------------------------
TTGATGC-------------------------------------------
GGGAGGG-------------------------------------------
GGGAGGG-------------------------------------------
--GAGAG-------------------------------------------
--GCGAG-------------------------------------------
--G-GGG-------------------------------------------
--G-GGG-------------------------------------------
--G-GGG-------------------------------------------
GCAAGGG-------------------------------------------
GTGAGGC------------------------------------------T
--GGGGG-------------------------------------------
--GGGGG-------------------------------------------
-GGAGGG-------------------------------------------
---AGGG-------------------------------------------
--AAAGG-------------------------------------------
TGGAGGG-------------------------------------------
--GGGAG-------------------------------------------
ATGAGGG-------------------------------------------
ATGAGGG-------------------------------------------
GGGTAGG-------------------------------------------
GGGAGGG-------------------------------------------
--GGCGC-------------------------------------------
AGGAGGG-------------------------------------------
-CGAAG--------------------------------------------
--GGGGG-------------------------------------------
GAGAGGG-------------------------------------------
-----GG-------------------------------------------
-----GG-------------------------------------------
GGGACGC-------------------------------------------
-CG-GGC-------------------------------------------
-AGGGGG-------------------------------------------
-GGCGGG-------------------------------------------
-AGGGGG-------------------------------------------
GGGAGGA-------------------------------------------
GAGAGGG-------------------------------------------
GAGAGGG-------------------------------------------
GAGAGGG-------------------------------------------
GGGAGGG-------------------------------------------
CCGGGGG-------------------------------------------
-CG-GGC-------------------------------------------
CAGATGG-------------------------------------------
GGGAGGG-------------------------------------------
--GAGAG-------------------------------------------
GGGAGGC-------------------------------------------
--GACGG-------------------------------------------
--GACGG-------------------------------------------
TCGAGGT-------------------------------------------
-CGGGGG-------------------------------------------
-CGGGGG-------------------------------------------
--AGGGG-------------------------------------------
GTGAGGC-------------------------------------------
--------------------------------------------------
--AGATG-------------------------------------------
--GGAGG-------------------------------------------
--GGGGG-------------------------------------------
--GAGGG-------------------------------------------
--GAGGG-------------------------------------------
GAGTGGG-------------------------------------------
GAGTGGG-------------------------------------------
--GGGGG-------------------------------------------
--GGGGG-------------------------------------------
-AGGGGG-------------------------------------------
ATAACGG-------------------------------------------
--GAGAT-------------------------------------------
--GCGGG-------------------------------------------
-AGGGGG-------------------------------------------
-AGGGGG-------------------------------------------
-AGGGGG-------------------------------------------
--GGGCG-------------------------------------------
-GGAGGT-------------------------------------------
-GGAGGT-------------------------------------------
GTGAGGG-------------------------------------------
GGGAGGG-------------------------------------------
GGGAGGG-------------------------------------------
--GCCGG-------------------------------------------
AGGCGGG-------------------------------------------
--GACGG--------------------------------------TGTGT
-GGTGGG-------------------------------------------
--GTGGG-------------------------------------------
--GAAGG-------------------------------------------
GGGAGGG-------------------------------------------
GGGAGGG-------------------------------------------
GGGAGGG-------------------------------------------
-GGAGG--------------------------------------------
---AGCG-------------------------------------------
--GACTA-------------------------------------------
-GTAGG--------------------------------------------
--GTGTG----------------------------------------TGT
-GGACG--------------------------------------------
--GACGG------------------------------------TGTGTGT
--GACGG------------------------------------TGCGTGT
--GGTGT-----------------------------------GTGTATGT
--GACGG--------------------------------------TGCGT
GTGTGGG-------------------------------------------
--GGGGG-------------------------------------------
-GGCGGG---------------------------------------GCGG
--GTGGT-------------------------------------------
--GTGGG-------------------------------------------
--GGTCG-------------------------------------------
--------------------------------------------------
--GTAAG-------------------------------------------
GATAGGG-------------------------------------------
--GTAGG-------------------------------------------
-GGAGGA-------------------------------------------
--------------------------------------------------
GGGTGTG-------------------------------------------
AGGAGGG-------------------------------------------
GGGTGTG-------------------------------------------
--GAGGG-------------------------------------------
GAGAGGG-------------------------------------------
--GGCGT-------------------------------------------
-TGTGGG-------------------------------------------
-TGGGGG-------------------------------------------
--AAGGG-------------------------------------------
--GGGTG-------------------------------------------
-AGGGGG-------------------------------------------
-GGTTGG-------------------------------------------
TGGTGGG-------------------------------------------
--G-GGG-------------------------------------------
--G-GGG-------------------------------------------
--G-GGG-------------------------------------------
--GAGAG-------------------------------------------
--GAAGG-------------------------------------------
--GAAGG-------------------------------------------
--GGGGA-------------------------------------------
CTGGGGG-------------------------------------------
--AAGGG-------------------------------------------
GGGAGGG-------------------------------------------
GGGAGGG-------------------------------------------
-AGAAGG-------------------------------------------
--GAGGG-------------------------------------------
--GAGGA--------------------------------TGTGGGCGTCG
---AGGA-------------------------------------------
---AGGC-------------------------------------------
GGGAGGT-------------------------------------------
-----GG-------------------------------------------
-----GG-------------------------------------------
-AG-GGG-------------------------------------------
---AGAG-------------------------------------------
--------------------------------------------------
CAGTGG--------------------------------------------
--G-GG--------------------------------------------
--G-GG--------------------------------------------
--G-GG--------------------------------------------
--AGCAA-------------------------------------------
--GGCAT-------------------------------------------
GGGAGGG-------------------------------------------
AAGTGGG-------------------------------------------
--AAGGG-------------------------------------------
TGGAGGG-------------------------------------------
--GAGGC-------------------------------------------
CAGAGGG-------------------------------------------
AGGAGGG-------------------------------------------
GGGAGGG-------------------------------------------
-GGCGG--------------------------------------------
-GGCGG--------------------------------------------
CGGAAGG-------------------------------------------
CGGAAGG-------------------------------------------
CGGAAGG-------------------------------------------
-AGCGGG------------------------------TGAGTGTGTGTGT
-AGCGGG----------------------TGAGTGTGTGAGTGTGTGTGT
---ACGC-------------------------------------------
--GAGGG-------------------------------------------
--GGGCG-------------------------------------------
GAGAGGG----------------------------------GGAAGAACA
-GGAGA--------------------------------------------
--GGGAG-------------------------------------------
TGGCGGG-------------------------------------------
--GAGAG-------------------------------------------
GGGAGGA-------------------------------------------
GGGTGGG-------------------------------------------
--GGGGG-------------------------TGATGGTGGTGGTGGTGG
--GGGGG-------------------------------TGATGGTGGTGG
TGGAGGG-------------------------------------------
--GGGGG-------------------------------------------
--GGCGG-------------------------------------------
--GTGGA-------------------------------------------
-TGAGGG-------------------------------------------
GAGAGGG-------------------------------------------
--GAAGG-------------------------------------------
GAGAGGG-------------------------------------------
GAGAGGG-------------------------------------------
GTGAGGT-------------------------------------------
--GGGAA-------------------------------------------
--GATGG-------------------------------------------
GAGAGGG----------------------------------GGAAGAACA
AAGAGGG----------------------------------GGAAGAACA
-AGATA--------------------------------------------
GGGAGGG-------------------------------------------
--------------------------------------------------
--GAGGA-------------------------------------------
GGGAGGG-------------------------------------------
ATGGGGG-------------------------------------------
ATGGGGG-------------------------------------------
TTGCCGG-------------------------------------------
-GGAGGG-------------------------------------------
--TAGTG-------------------------------------------
ACCATGG-------------------------------------------
--G-GGG-------------------------------------------
--------------------------------------------------
--G-GGG-------------------------------------------
--GGGGG-------------------------------------------
-AG-GGG-------------------------------------------
--GAAGG-------------------------------------------
--GAAGG-------------------------------------------
GAGAGGG-------------------------------------------
--GAGGA-------------------------------------------
--GAGGG-------------------------------------------
---AGGG-------------------------------------------
GAGCGGG-------------------------------------------
--GGGGG-------------------------------------------
GGGAGGG-------------------------------------------
-GGAGG--------------------------------------------
---TGGG-------------------------------------------
---CGGG-------------------------------------------
--GAGGG-------------------------------------------
--GAGGG-------------------------------------------
--GAGGA-------------------------------------------
--GAGGA-------------------------------------------
--GTGG--------------------------------------------
--GGGGG-------------------------------------------
--GGGGG-------------------------------------------
GGGAAGG-------------------------------------------
--GAGGA-------------------------------------------
--GAGGA-------------------------------------------
--GGGAG-------------------------------------------
-AGAGG--------------------------------------------
--GTTCT-------------------------------------------
--GGGAG-------------------------------------------
--GGGGG-------------------------------------------
--AAGGG-------------------------------------------
--AAGGG-------------------------------------------
--GGTTA-------------------------------------------
--------------------------------------------------
--AGACA-------------------------------------------
---ACGG-------------------------------------------
----GGG-------------------------------------------
----GGG-------------------------------------------
----GGG-------------------------------------------
--GAGGG-------------------------------------------
GGGAGGG-------------------------------------------
--GGGGG-------------------------------------------
GGGAGGG-------------------------------------------
GGGAGGG-------------------------------------------
GGGAGGG-------------------------------------------
-AGCGGG-------------------------------------------
--GCGGA-------------------------------------------
-GGCGG--------------------------------------------
-GGCGG--------------------------------------------
-GGCGG--------------------------------------------
--GATGT-------------------------------------------
GGGAG---------------------------------------------
GAGAGGG-------------------------------------------
GAGAGGG-------------------------------------------
GAGAGGG-------------------------------------------
-CAAGTG-------------------------------------------
-CAAGTG-------------------------------------------
GGGCGGG-------------------------------------------
--GAGGG-------------------------------------------
--GTGGG-------------------------------------------
GGGAGGG-------------------------------------------
-GGTGC--------------------------------------------
--ATGGA-------------------------------------------
--GGGGG-------------------------------------------
ATGATGG-------------------------------------------
--GGGGG-------------------------------------------
--GCGGA-------------------------------------------
CGGAGGG-------------------------------------------
--GCGGG-------------------------------------------
--GTCGG-------------------------------------------
--GTCGG-------------------------------------------
--GAGGG-------------------------------------------
--GAGGG-------------------------------------------
--GAGGA-------------------------------------------
--GAGGA-------------------------------------------
--GAGGA-------------------------------------------
--GAGGA-------------------------------------------
--GAGGA-------------------------------------------
--GAGGA-------------------------------------------
--GAGGA-------------------------------------------
--GGGGG-------------------------------------------
AGCACGG-------------------------------------------
--GGAGC-------------------------------------------
--AAGGA-------------------------------------------
GGGCGGG-------------------------------------------
CGGAAGG-----------------------------------CCTACACC
AAGAGGA-------------------------------------------
GCGGGGG-------------------------------------------
--GGGGG-------------------------------------------
-TGTG---------------------------------------------
--G-GGG-------------------------------------------
--G-GGG-------------------------------------------
GCGAGGG-------------------------------------------
-GGAAAG-------------------------------------------
--GGGGG-------------------------------------------
--G-GGG-------------------------------------------
---AGGG-------------------------------------------
--GGGGG-------------------------------------------
--GGGGG-------------------------------------------
--GAGGG-------------------------------------------
CGGTGG--------------------------------------------
AGGAGG--------------------------------------------
AGGAGG--------------------------------------------
--TATGA-------------------------------------------
--GGGGG-------------------------------------------
--GGGGG-------------------------------------------
-AGACA--------------------------------------------
-GGAGA--------------------------------------------
-AGCGG--------------------------------------------
TGGAGGA-------------------------------------------
GGGAGGG-------------------------------------------
--GAGGG-------------------------------------------
--GAGCG-------------------------------------------
---AGGG-------------------------------------------
--GACGT-------------------------------------------
--------------------------------------------------

-------------------CACCTTA---------------CAC----AG
--------------------ACAC-----------------CTC----AG
-----------------GCGTCGC-----------------CTC----AG
--------------------CTAC-----------------CCC----CG
-------------------AACAC-----------------CTC----AG
------------------GTGCGT-----------------CTC----AG
--------------------GCAC-----------------CCC----AC
-------------------TACAC-----------------ATC----GG
------------GTGGGGGTGCAA-----------------CTC----AG
---------------GGGACACACCG---------------CAC----AG
---------------CGGACGCACCCCT-------------CTC----GG
------------------ACACACGC---------------CTC----AG
-------GGAGGGCACCCATACAC-----------------CTC----AG
AGGGGGGGAGGGAGGGGGCAACCCT----------------CAC----AG
------GGGAGGGAAGGGGCGCAC-----------------CTG----AG
--------------------ACACT----------------CTC----CG
---------AGAAAGGGGGGCCAC-----------------CTC----AG
----------------GCACGCAC-----------------CTC----CG
----------------GCACGCAC-----------------CTC----CG
----------------GCACGCAC-----------------CTC----CG
--------------------GAAC-----------------CTC----CG
GCGCACAGACACACACGCGCGCAC-----------------CTC----TG
GCGCACAGACACACACGCGCGCAC-----------------CTC----TG
GCGCACAGACACACACGCGCACAC-----------------CTC----TG
GCGCACAGACACACACGCGCACAC-----------------CTC----CG
-------GGAGGGCACCCATACAT-----------------CTC----AG
----------GGGGGGGGAAGCGC-----------------CTC----AG
--------------------------------------------------
---------------GGCGCACACAT---------------CTC----CG
---------------GGCGCACACAT---------------CTC----CG
----------------------GCCT---------------TGC----AG
--------------TCTCCCTCACTTTGT------------TTT----CT
-----------------CACACACCT---------------CTC----AG
-------------------AAGGC-----------------CTC----GG
------------------GTCCAA-----------------CTC----AG
------------------GTCCAA-----------------CTC----AG
TGACAGAGTATCGCGAAGGCAGGT-----------------GGG----AG
---------------GGCGCACAC-----------------CGC----AG
---------------GGCGCACAC-----------------CGC----AG
----------GAGGGGGCGCACAC-----------------CGC----AG
----------GAGGGGGCGCACAC-----------------CGC----AG
CCCTCAGAGTTTGTGTGGGTGTGC-----------------GTG----TG
--------------------GCGC-----------------CTC----GC
--------------------GCGC-----------------CTC----GC
-------------------GGCAC-----------------CTC----AG
---------------------TGC-----------------CTC----AG
----------------GGGGTCGC-----------------CTC----GG
--------------GAAGGG------------------------------
--------------------AGAC-----------------CCC----AG
--------------------ACAC-----------------CCC----AG
--------------------ACAC-----------------CCC----GG
--------------------ACAC-----------------CCC----GG
-------------------TACAC-----------------CCC----GG
-----------------GGGTCGC-----------------CTC----GG
TGGGCGCGAGGGTCACATGCACAGCGCCC------------CTC----AG
--------------------ACAC-----------------ACT----AG
----------------GGGGTCGC-----------------CTC----GG
-------------------GCCAC-----------------CTC----AG
-------------------GCCAC-----------------CTC----AG
-----------AACACGCACACACGCTT-------------CTC----AG
GGCCACCCGCACGCACACGCACACGCCT-------------CTC----AG
----------------GGAGACACGCCT-------------CTC----CC
---------TGCGTCGTCTAAGAC-----------------GTG----CC
----------------GGAGACACGCCT-------------CTC----CC
-------------------GACAC-----------------CTC----CG
-------------------GACAC-----------------CTC----CG
AGGTTACACCGGACCCCCACACACGCTT-------------CTC----AG
AGGTTACACCGGACCCCCCCACACGCTT-------------CTC----AG
CAACAGACACACACACACACACACGCTT-------------CTC----AG
----------------GGAGACACGCCT-------------CTC----CC
-----------------CAGACAC-----------------CTC----GA
--------------------ACAC-----------------CTG----TG
--------------------ACAC-----------------CTC----AG
-----------------CACACACCC---------------CTC----CG
--------------------AAGC-----------------CTT----TT
GAGGGGGAGGGGGCACACACACACC----------------CTC----AC
--------------AGGGGCACAC--------------------------
--------------GCACGCGCACCC---------------CTCTTCGCG
--------------------GCAC-----------------CTG----CG
--------CAAAGGGGGTGCGCAC-----------------CTC----TG
-----------------GGAGCAC-----------------CTC----CG
--------GAAAGGGGGTGCGCAC-----------------CTC----TG
--------------------ACACA----------------AGC------
---------------CACACACAC-----------------CTC----CG
---------------CACACACAC-----------------CTC----CG
-------------------CACACCC---------------CTC----CG
---------------GGCACACACCC---------------CTC----CG
------------GGGGGCACACACCC---------------CTC----CG
-----------GGGGGGCACACACCC---------------CTC----CG
-------------GGGGTGGACGC-----------------TTC----CG
-----------CGCACACACACAC-----------------CTC----CA
-----------CTCACCCCCCCCC-----------------CTA----CG
-----------GGGCTCCCCCCCC-----------------CTC----CG
-------------GGCACACGCAC--------------------------
-------------------TACAC-----------------CTC----GG
-------------------CACAC-----------------ATC----GG
--------------------------------------------------
------------------GTACCCCCCTC------------CTC----CG
-------------------GACGC-----------------CTC----AA
-------------------GACGC-----------------CTC----AA
---------------------CAT-----------------CTC----AG
---------------------CAT-----------------CTC----AG
-------------------TACAC-----------------CTC----GG
-------------------CACAC-----------------ATC----GG
-----------------GGGACGC-----------------CTA----CG
TGAAGGGAAGAGCGTCGCGCACAC-----------------CC------G
TGAAGGGAAGAGCGTCGCGCACAC-----------------CC------G
-------------------GACGC-----------------CTC----CG
------------AGCGGGGTACGCAGCCC------------ATC----TC
CAGTCATCGCCAGACATCGGTGTT-----------------GTC----TG
--------------------ACGCTTCC-------------CTC----AA
----------GGGGGGACGCACACCT---------------CTC----AG
ACACACACACACACACACACACAC-----------------CTC----AG
----------ACACACACACACACCT---------------CTC----AG
-----------GGGGGACGCACACCT---------------CTC----AG
--------------GGACGCACACCT---------------CTC----AG
-------------------CACACCT---------------CTC----AG
ACACACACACACACACACACACACCT---------------CTC----GG
-------------------CACACGCGC-------------CTC----CA
-------GGGTGGGGGTGGCACACAT---------------CTC----CG
-----------ACCTTCTGTGTGC-----------------ATG----TG
--------------------ATACTT---------------CTC----AG
---------CCGGACACCGGTCAG-----------------CGC----AT
--------------------CCAC-----------------CCC----AA
--------------------CCAC-----------------CCC----AA
-----AGGTGGGGCGCACACACAC-----------------CGC----AA
-----AGGTGGGGCGCACACACAC-----------------CGC----AA
-----------CAGACACTCAACC-----------------CTC----CG
CTCACCCCACCCACACGCATACGC------------------CC----AG
-----AGGTGGGGCGCACACACAC-----------------TGC----AA
-----AGGTGGGGCGCACACACAC-----------------CGC----AA
-----AGGTGGGGCGCACACACAC-----------------CGC----AA
-------------------CACAC-----------------CTC----AG
------------------ATACGC-----------------CTC----TC
----------------CCGGACACCGGTC------------GTGC---AT
-----------------CAGACGC-----------------CTC----AG
-------------CCGGTGAAAACTCC--------------GTG----AG
-----------------GATACAC-----------------CTC----TC
--------------------ATAC-----------------CTC----AG
------------------ATACAC-----------------CTC----CC
------------------ATACAC-----------------CTC----CC
------------------ATACGC-----------------CTC----TC
--------------------ACAT-----------------CTC----AG
--------------------ACAT-----------------CTC----AG
--------------------ACAT-----------------CTC----AG
--------------------ACAT-----------------CTC----AG
AGGGCGGGGCGGGGGGGGGCGCACCTG--------------CTC----AG
------------------CCACAC-----------------GTC----AC
------------------CCACAC-----------------GTC----AC
---------------------CAC-----------------CTC----CG
--------------------ACCC-----------------CTC----GG
--------------------CCAT-----------------CTC----CG
-----------------AGAGCAT-----------------ATC----CG
--------------------GCAT-----------------CTC----CG
-----------------AGGACAT-----------------CTC----CG
-------------------CACACCT---------------CTC----GA
-------------------CACACCT---------------CTC----GA
--------------GACAAGGCCC-----------------CGC----AG
--------------GACAAGGCCC-----------------CGC----AG
--------------GACAAGGCCA-----------------CGC----CC
--------------GACAAGGCCC-----------------CGC----AG
--------------GACAAGGCCA-----------------CGC----AG
------------------GGGCAC-----------------CCC----AG
AGGCAGGCAGGCGGGCGGGCACGC-----------------TCC----AG
------------------GTACAC-----------------CCC----AG
--------------------ACAC-----------------CCC----AG
-------------CGTGGGTACAC-----------------CTC----AG
-------------CGTGGGTACAC-----------------CTC----AG
AGGGAGGAAGGGGGGGGGGCGCAC-----------------CCC----AG
-------------------------------------------------G
--------------------CTCC-----------------CTA----TG
----------------ACACAGAC-----------------CTC----AA
--GGTGGGTGGGTGGGTAGGGGAT-----------------CAT----AG
---------------------CAC-----------------CCC----AG
---------------------CAC-----------------CCC----AG
---------------------CAC-----------------CCC----AG
---------------------CAC-----------------CCC----AG
---------------------CAC-----------------CCC----AG
---------------------GGC-----------------CCC----AG
---------------------CAC-----------------CCC----AG
--------------------ACAC-----------------CAC----AG
-----------------GACACACCT---------------TTC----CG
------------------AAACACCT---------------CTT----TC
------------------AAACACCT---------------CTT----TC
------------------AAACACCT---------------CTT----TC
-------------------GACGC-----------------CTC----CG
------------------GGACAC-----------------CTC----AG
--------------------CTGC-----------------CTC----AG
--------------------ACAC-----------------CTC----AG
-----------------CACACCT-----------------TTC----CG
-----------------CACGCCC-----------------CTC----CG
--------------------ATAC-----------------TTC----GC
----------------CACGAACC-----------------CTC----TG
----------------------AC-----------------TTC----AC
--------------------ACGC-----------------CTC----AC
AGTTTTGGTGGTGTGTGTACGCGT-----------------GTG----AG
-AGTGTGAAGGCGAAGGGGCGCAC-----------------GTG----AG
-------------------GACAC-----------------CCC----AG
-------------------GACAC-----------------CCC----AG
-------------------GACAC-----------------CCC----AG
-------------------GACAC-----------------CCC----AG
------GGGAGGGAAGGGGCGCAC-----------------CTG----AG
--------------------ATGC-----------------CTG----CG
--------------------ATAC-----------------CTC----GG
-----------------GAGACAC-----------------CCC----CA
-------------------GAAAC-----------------TCC----CA
-------CGCACACACATACATACA----------------CAA----AG
---------------TACACGAGC-----------------CCC----AG
-------CGCACACACATGCATACA----------------CAC----AG
-------------CGCACAAACACA----------------CAC----AG
---------------TACACGAGC-----------------CCC----AG
---------------TACACGAGC-----------------CCC----AG
-----------------CACAAACATACC------------CACACACAG
--------------------AAAC-----------------CCC----GG
------GGGAGGGAAGGGGCGCAC-----------------GTG----AG
------GGGAGGGAAGGGGCGCAC-----------------CTG----AG
-------------------TACAC-----------------CTC----AG
----------------ACGCACACCT---------------CTC----GA
--------AAGGGGGTACACACACCT---------------CTC----GG
---------------GACACACACCT---------------CTC----GA
-----------------CATGCACTT---------------CTC----GG
-------------GGTACACACACCT---------------CTC----GG
-------------GGCACACACACCT---------------CTC----GG
--------------------ACAC-----------------CTC----CG
--------GCGCACACGTATACACCG---------------CAT----AA
------------GTGCCC--------------------------------
CCTCTCGTCTCCCCTCCGCCAAGCT-------------------------
----------GGGTGGGGGCACCC-----------------CGC----AG
----------GGGTGGGGGCACCC-----------------CGC----AG
----------------GAGCACTG-----------------CTG----AG
--------------------------------------------------
---------GGGGGGGGGGAGTGT-----------------CTA----AG
---------------GGAGGGCGC-----------------CAC----AG
---------------G----------------------------------
--------------------ATAC-----------------CGC----AC
------------------TGTTGC-----------------CTC----CA
------------------TGTCGC-----------------CTC----CA
----------GGGGGGGTGCACACCCCT-------------CTC----AG
--------------------GCACCCCT-------------CTC----AG
AAATGTGGTTGTGCATGCGCACAT-----------------CTG--TGGA
--------------------ACAC-----------------CTC----AG
-------------------GACAC-----------------CTC----AG
-------------GGGGGGAGTGT-----------------CTA----AG
--------------------------------------------------
AGCAGAGGAGAGAGGGGGCCACACCGC--------------CTC----AG
AGCAGAGGAGAGAGGGGGCCACACCGC--------------CTC----AG
----------ACGCGCGGCCACACTGC--------------CTC----AG
------------AGGGGGCCACACCGC--------------CTC----AG
------------AAGGGGCCACACCGC--------------CTC----AG
-------------------TACAC-----------------CTC----AG
-------------GAGGGGCACCGCCT--------------CTC----GG
------------------GCACCGCCT--------------CTC----GG
ACACACATACACACACACACACACCGCCT------------CTC----GG
ACACACATACACACACACACACACCGCCT------------CTC----GG
------------AGGGGCGCACACCG---------------CCC----CG
------------AGGGGGCCACACCGC--------------CTC----AG
--------------------ACACCT---------------CTC----CG
--------------------TGAC-----------------CTC----CG
--------------------ACACCT---------------CTC----CG
--------------------TGAC-----------------CTC----CG
--------------------ACAC-----------------CTC----AG
--------------------GCAG-----------------ACC----AT
------------------------------------------TT----GC
--------------------TGAC-----------------CTC----CG
-----------------GGCACACCT---------------CTC----CG
-------------------GATA-------------------TC---AAG
----------AGGGGGCCGCACCGC----------------CTC----AG
-------GGGACACCCCCACACAC-----------------ACT----AG
-------------GGGAGGCACACCC---------------CTC----AG
TGCACACATCTCCGACCCCCACCC-----------------CTC----AG
--------------GCACACACAC-----------------CTC----CG
--------------------ACAT-----------------CCC----CG
--------------GCACACACAC-----------------CTC----CG
--------------GCACACACAC-----------------CTC----CG
--------------GCACACACAC-----------------CTC----CG
--------------GCACACACAC-----------------CTC----CG
--------------GCACACACAC-----------------CTC----CG
--------------GCACACACAC-----------------CTC----CG
------------AGTTACACACAC-----------------CTC----AG
---------ATGCCCCCTCCCCCCT----------------CCC----AG
-------------------GACACCC---------------CTC----AG
-------------GGGGAGGAGAC-----------------CGC----GG
------------------AGACAC-----------------CTC----CG
------------------AGACAC-----------------CTC----CG
------------------AGACAC-----------------CTC----CG
--------------GCACACACAC-----------------CTC----CG
-----------------GTAGCAC-----------------CGC----AA
--------------------ACAC-----------------CGC----AA
-------------------GACAC-----------------C-G----AG
------------------AAACGC-----------------CTC----AG
-------------------GACAC-----------------CGC----AG
------------------AAACGC-----------------CTC----AG
-----------------AACACACCT---------------CTC----CG
--------------------ACACC----------------CTC----A-
--------------------AAACC----------------CTC----AC
GGGGGCGGGGGGGGGGGAACACACCT---------------CTC----CG
--------------------ACAC-----------------ACT----AG
----TGGGGGAAGGGGGAGGAAAC-----------------CTC----GC
-------------------TACAC-----------------CGC----AC
-------------------AACGC-----------------CTC----AG
-------------------AACGC-----------------CTC----AG
--------------------ATGC-----------------CTC----AG
--------------------ACGC-----------------CTC----AG
-------------------GACACCC---------------CTC----AG
---------AGGATGGCGGCATCC-----------------CTC----AG
---------------GGAGCACAC-----------------CTC----AG
---------------GGAACGCAC-----------------CTC----AG
---------------GGAGCACAC-----------------CTC----AG
-----------------AGCACAC-----------------CTC----AG
-----------------AGCACAC-----------------CTC----AG
------------------AGACAT-----------------TGC----AG
------------GGGGGGGGACAT-----------------TGC----AG
------------------GGACAT-----------------TTC----AG
------------------GGACAT-----------------TGC----AA
------------------GGACAT-----------------TGC----AG
------------------GGACAT-----------------TGC----AG
----------------GGCGACACCG---------------CTC----AG
------------------CGACACCG---------------CTC----AG
----------------GGCGACACCG---------------CTC----AG
------------------CGACACCG---------------CTC----AG
-------------------GACACCGCTC------------AAC----AG
--------------------ACAA-----------------CTC----AG
-------------------AACAG-----------------CTC----CG
----GGGAGGTTAGTGGTGGCCAC-----------------CTC----GG
-------------------CACCG-----------------CTC----AG
--------------------ACAC-----------------T-C----AG
-------------------GACAC-----------------CGC----GG
TGGGAAAGGGGGAGGCGCGCACAC-----------------CTC----AC
-----------------CGCACAC-----------------CTC----AC
----------GGAGGCGCGCACAC-----------------CTC----AC
-------------------GACAC-----------------CTC----AG
---------------------CAC-----------------CTC----AG
---------------------CAC-----------------CTC----AG
--------------------ACA------------------CTC----AG
-------------------CACCG-----------------CTC----AG
-------------------CACCG-----------------CCC----AG
--------------------ACAC-----------------CTC----AG
--------------------GCAC-----------------CTC----AA
---------------GGCACACACGC---------------CTC----CG
CGTACTCCTTTTCCTTCTGCCCACCC---------------GCC----AG
--------------ACACGCGCACCC---------------CTCTC--AG
----------------GGTGTGA---------------------------
-----------GTGACACACACACATCC-------------CTCTC--AG
------------ACGCAAGCACACCC---------------CTCTC--GG
--------GGGAGCACACAGACACCCGCC------------CTC----AG
-----GGGGGGAGCACACAGACACCCGCC------------CTC----AG
------------GTGGTGTCGCAC-----------------CTC----AG
GCACACACACAAACATACATACAG-----------------CTC----AG
GCACACACACAAACATACATACAG-----------------CTC----AG
--------GGGAGCACACAGACACCCGCC------------CTC----AG
CCACACACACAAACATACATACAG-----------------CTC----AG
--------ACACAACTTCGTAGTT-----------------CTCAC--GG
--------------------------------------------------
------------------GCACATTC---------------CTCTC--AG
ACACACACACACACACACACACACCC---------------CTTTC--AG
--------------------------------------------------
--------------GGTGGCACACAGCG-------------CTC----AG
--------------------ACAC-----------------CTC----AG
--------------------ACAC-----------------CTC----AG
--------------------GCAC-----------------CTC----AG
--------------------------------------------------
--------------------ACAC-----------------CTC----AG
-------------------CGCAC-----------------CAC----AG
-------------------CGCAC-----------------CAC----AG
-------------------CGCAC-----------------CAC----AG
GTGGGTGATGCGTGTT----------------------------------
--------------------------------------------------
-----------------GGGACAC-----------------CGT----AG
----------------ACGCACGC-----------------CTC----AG
----------------ACGCACGC-----------------CTC----AG
----------------ACGCACGC-----------------CTC----AG
---------------------CAC-----------------CCT----CG
------------------AAACAC-----------------CTC----AG
------------------AAATAC-----------------TTC----AG
------------------ACACAG-----------------CGG----AG
--------------------ACAC-----------------CTC----AG
----------------GCACACAC-----------------CTC----CG
-------------------AACAC-----------------CTC----AG
--------------GCACACACACCTTT-------------CTC----AG
------------------GAACAT-----------------CTC----CG
------------------GAACAT-----------------CTC----CG
--------------------ACAC-----------------CTC----AG
----------------------AC-----------------CTC----AG
--------------GCACACACACCTTT-------------CTC----AG
-----------------CGGCCAC-----------------CTT----TT
--------------------ACAC-----------------CTC----AG
--------------------ATAC-----------------TGC----AG
-------------------CGCGC--------------------------
---------------------CGC-----------------CTC----AG
--------------------ACAC-----------------CTC----AG
--------------------ACAC-----------------CGC----AG
--------------------ACAC-----------------CGC----AG
--------------------ACAC-----------------CGC----AG
-----------------GACACAC-----------------CGC----AG
-----------------GACACAC-----------------CGC----AG
------------------CGCGAT-----------------CTC----GG
--------------------ACAC-----------------CTC----AG
--------------------ACAC-----------------CTC----AG
--------------------ACATCT---------------CTC----AG
--------------------ACATCT---------------CTC----AG
--------------------ACGCCT---------------CTC----CG
--------------------GCGC-----------------TGC----AG
-----------------CCGCCAT-----------------TTC----AT
-------------GGGGGTGCCA------------------CTC----AG
--------------------ACACCA---------------CTC----AG
----GCACACACACGCACACACACCA---------------CTC----AG
--------------------ACAC-----------------CTC----AG
--------------------ACAC-----------------CTC----AG
--------------------CCAC-----------------CTT----GG
--------------------CCAC-----------------CTT----GG
--------------------ACACGCCCC------------CTC----GG
--------------------ACACGCCCC------------CTC----GG
--------------------ACACGCCCC------------CTC----GG
GGGGGGTGGCGGGGGGGGGCGCTTCT---------------CCA----GG
--------------------ACCCCT---------------CTC----GG
------------------ACGAAC-----------------CTC----AG
CGGGGGGAGCACACACAAACACACCCCT-------------CTC----GG
----------------AAACACAC-----------------CGC----AG
-------------------CCCAC-----------------CTC----AG
-----------------CGCACAC-----------------CTC----AG
-----------------ACCGCCCA----------------CAC----AG
GGGTAAGGCGGGGACAGACCGCCCA----------------CAC----AG
GCCACCGCCGTCACTGTGCCCCAC-----------------CAC----AG
-------------------TACAC-----------------CTCATACAG
-------------------TACAC-----------------CTCATACAG
-------GACACACACGCACGCAC-----------------CTCATACAG
--------ACACACACGCACGCAC-----------------CTCATACAG
--------------------ACACAT---------------TTC----AG
--------------------ACACAT---------------CTC----AG
---------------------CGCCTTA-------------CAC----AG
---------------------CACCTTA-------------CAC----AG
GGGGGGAGGGGCGCACACACACACCT---------------CTC----AG
ACACACACATCTCACACTTCAAAC-----------------CTCACACCG
TCATTTTTTTTCTCTTTATTGTCA------------------AA----AC
---------GGGAGACATACACCC-----------------CTCCC--AG
---------------AACGCACCG-----------------CTT----GG
---------------AACACACCC-----------------CTCCC--AG
--------------------ACGC-----------------CTC----CG
--------------------ACGC-----------------CTC----CG
-----------------CACACCC-----------------CTCCC--AG
--------------------ACAC-----------------CTC----AG
--------------------ATAC-----------------CTTT---AG
--------------------ACAC-----------------CTTT---AG
GCGCACACATACACACACACACAC-----------------CTCCC--AG
ACACACACACACACACACAGACAC-----------------CTCCC--AG
ACCCCCACACACGCACACACACAC-----------------CTCCC--AG
--------------------CCAC-----------------CTC----CG
ACACAAATACACACACACACACGC-----------------CTC----AG
--------------------ACAC-----------------CTC----GG
--------------------ACAC-----------------CTC----GG
CACCTCACACACACAAACACACACGC---------------CTC----AG
-----------------GGCACACCCCG-------------CTG----AG
--------------------CCGC-----------------CTC----AG
-----------CACACACACACACCT---------------CTC----AG
-----------CACACACACACACCT---------------CTC----AG
---GGGGGGTGAGGTGGTCACCAC-----------------CAC----AG
-----GGGGTGAGGTGGTCACCAC-----------------CAC----AG
-----GGGGTGAGATGGTCACCAC-----------------CAC----AG
-------------------AACAC-----------------CTC----GG
------------------GGACAC-----------------CTC----AG
---------------------CAC-----------------CTC----AG
---------------------CTC-----------------CTC----AG
-----------------------A-----------------ACC----AT
-------------------ATAAG-----------------CCT----TG
-----------------GGCACAC-----------------CTG----AG
-----------------GGCACAC-----------------CTG----AG
-------------------AACAC-----------------GTC----AG
--------------------CCGC-----------------CGC----CG
--------------------ACAC-----------------CTC----CG
----------------------AC-----------------CTC----CG
--------------------CCCC-----------------TGC----AG
--------------AGGCACACACGC---------------CTC----CG
--------------------GCAG-----------------CTC----CG
--------------------ACAA-----------------CTC----AG
--------------------ACAC-----------------CTC----AG
----------------ACACACGC-----------------CTC----AG
--------------------ACAC-----------------CTC----AG
---------------GCCACGCAT-----------------CTCGC--CG
--------------------ACAT-----------------CTC----AG
------------GCGGCCACGCAT-----------------CTCGC--CG
--------------------ACAT-----------------CTCGC--CG
------------GCGGCCACGCAT-----------------CTCGC--CG
-GGTCGGGGCAAGGGGTGACACACCC---------------CTC----AG
-----------------------C--------------------------
TTGTGCGCGTTATCGATCTATCAC-----------------CTG------
---------------TA------C-----------------CTC----AC
-----------------GACGCAC-----------------CTC----CG
--------------------------------------------------
--------------------------------------------------
-GGGTGGGTGCGTCTACTGCACCC-----------------CTC----TG
-------------------CGCCC-----------------CTT----CG
------------------GCACCC-----------------CTC----TG
-------------------CACCC-----------------CTC----TG
-------------------AACACCG---------------CTCCG--TG
ACCCACCCACACACACACACACAC-----------------ATC----AG
ACCCACCCACACACACACACACAC-----------------ATC----AG
ACCCACCCACACACACACACACAC-----------------ATC----AG
-------------------ATCAC-----------------CGC----AG
--------------------TCGT-----------------CTC----AC
--------------GCGGACACGCATCT-------------CTC----AC
---------GGGGGGCGGACACACATCT-------------CTC----AC
--------------------GGGC-----------------CTC----GC
--------------------GGGC-----------------CTC----GC
--------------------GGGC-----------------CTC----GC
--------------CTGTTGTGGC-----------------TTT----G-
--------------------ACAC-----------------CTC----AG
--------------------ACAC-----------------CTC----AG
---------------------AAC-----------------CTTTG--AG
-------------------GGGACC----------------CCC----AG
-----------------CATACAC-----------------CTC----CG
-----------------CACACAC-----------------CTC----CG
------------GGGGGCATACAC-----------------CTC----CG
------------GGGGGCACACAC-----------------CTC----CG
---------GGGGGGGTCGCCCCC-----------------CTC----AG
----------GGTGTGGAGGACAACC---------------CTC----AG
----------GGTGTGGAGGACACCC---------------CTC----AG
----------AGTGTGGAGGACACCC---------------CTC----AG
----------GGTGTGGAGGACACCC---------------CTC----AG
----------AGTGTGGAGGACACCC---------------CTC----AG
--------------GGAAGCACTC-----------------CTC----AG
-----------GTGTGGAGGACACCC---------------CTC----AG
--------------GGAAGCACCC-----------------CTC----AG
--------------------ACC------------------CCC----AG
-------------------AACAC-----------------CTC----AG
--------------------ACAC-----------------CTC----AG
------------GGGGGCACACAC-----------------CTC----CG
----------GAGGGGGCGCACACAT---------------CTC----CG
--------------------ACACCCCTC------------CTC----AG
--------------------TCGCCTTTC------------CTC----AG
--------------------ACACCCCTC------------CTC----AG
--------------------ACGT-----------------CTCCG--TG
--------------------ACACCCCTC------------CTC----AG
------------------------------------------T-----TG
--------------------ACAC-----------------CT-----TG
---------------------CAC-----------------CTC----CG
------------CGCCTGCTTCA------------------CAC----TG
--------------------ACACCCCTC------------CTC----AG
--------------------ATAACCCTC------------CTC----AG
--------------------ACACCCCTC------------CTC----AG
------------GCGGTGATGCAC-----------------CTC----AC
-------------------GACACCC---------------CAC----AG
GGGTGGAGTGAGGAGGGTGGGCAC-----------------CGC------
-----------------TGGGCAC-----------------CGC------
--------------------------------------------------
-----------------GGGACACCCCT-------------CTC----CG
GGCAGAGAAGGGATGCGTTGAGAC-----------------GTC----AG
---GGGGGTGCTGCTGCCGCACACGCTT-------------CTC----AG
------------------GGGCACC----------------TC-----AG
------------------GGCCAC-----------------CTC----AG
---------------GGGGGGCACATGC-------------CTC----TG
--------------ATCCCTTTAT--------------------------
-------------------CTTAT-----------------CTC----CG
-------------------CTTAT-----------------GTC----CG
-------------------GACAC-----------------GTC----AG
-------------------GACAC-----------------GTC----AG
-------------------GACAC-----------------GTC----AG
--------AGAAAGGGGGGGCCAC-----------------CTC----AG
--------------------------------------------------
-------GGAGAAAGGGGGGCCAC-----------------CTC----AG
-------GGAGAAAGGGGGGCCAC-----------------CTC----AG
-------GGAGAAAGGGGGGCCAC-----------------CTC----AG
-------------GGAGGGGACAC-----------------CTC----AG
-----------------------------------------CTC----AT
GAGAGAGGGATGAAGGGCACCCACGCC--------------TTT---AAG
----------------TGGAACAC-----------------TTT----AG
---------------GGGGGGCGT-----------------CTC----TC
------------------GACCAC-----------------CCC----GG
------------------GACCAC-----------------CCC----GG
------------------GACCAC-----------------CCC----GG
--------------GGGGGCACATGC---------------CTC----TG
--------------------ACAC-----------------CTC----AT
---------------------CAC-----------------CTC----AT
--------------------ACAC-----------------CTC----AT
-------------GGGGGGCACATGC---------------CTC----TG
------------------GGACAC-----------------CTC----CG
---GAGGAGGGGGAAGGGGGATGC-----------------CTC----AG
-----GGGGGAGTAGGGTGGACACACCT-------------CTC----CG
--------------------ACGC-----------------CTC----CG
--------------------GGAT-----------------CTC----AG
-------------GGTGGGGGAAG-----------------CTA----AG
-----------------TGGGCAC-----------------CTC----AG
------------GCGGGGGGACAC-----------------CTA----AG
---------CAAGGGGGGGAGCAC-----------------CGA----AG
-------------GGTGGGGGAAG-----------------CTA----AG
--------------------GCAC-----------------CTA----AG
--------------------ATAC-----------------CTC----AG
-----------GGGCGGGACACACCC---------------CTC----AG
---GTGACGGGGGGCAGGACACACCC---------------CTC----AG
--------------------TCAG-----------------CGC---AAG
GGGGGGCGGGGGCGGGTCGCGCCC-----------------CTC----TG
-----GGGAGTAGGGCGGACACACCT---------------CTC----CG
--------CCACACACATACACACCT---------------CTC----CG
----------GGAGGCGGACACACCT---------------CTC----CG
-----GGGAGTAGGGTGGACACACCT---------------CTC----CG
GTGGGGGGAGTAGGGTGGACACACCT---------------CTC----CG
----------------GGACACACCC---------------CTC----CA
--------------GGGGACACACCC---------------CTC----CA
---------------------TAT-----------------TTG----AG
------GGGGGAGGGGAGGGACAAAGCC-------------CTC----CA
------------GGGAGGACACACCC---------------CTC----CA
-------------------GTCGC-----------------CTC----AG
-------------------GTCGC-----------------CTC----AG
--------------------ACGC-----------------CTC----CG
--------------------ACGC-----------------CTC----CG
---------GGAGACGGAGGACGC-----------------CTC----CG
---------------------CAC-----------------CGC----AG
-----------GGGCGGGACACACCC---------------CTC----AG
--------------------TCAC-----------------CTC----AG
----------------ACACACACCT---------------CTC----CG
----------------ACACACACCT---------------CTC----CG
-----------------------------------------ACC----AC
--------------------ACATCT---------------CTC----CG
-------------------AACATCT---------------CTC----CG
-------------------GATAC-----------------CTC----AG
-----------------GACACACCC---------------CTC----CG
-------------------GACAG-----------------CTC----AG
------------------GGACTC-----------------CTC----GG
------------------GGACTC-----------------CTC----GG
------------------GGACTC-----------------CTC----GG
-------------CGGGGTGATGC-----------------CGC----AG
----------------CCACACACCG---------------CTC----AG
---------------GGGGCACAC-----------------CTC----AG
---------------GGGGCACAC-----------------CTC----AG
----------------GGGCACAC-----------------CTC----AG
----------------GGGCACAC-----------------CTC----AG
----------------GGGCACAC-----------------CTC----AG
----------------GGGCACAC-----------------CTC----AG
----------------GGGCACAC-----------------CTC----AG
----------------GGGCACAC-----------------CTC----AG
-------------------CACACATTC-------------CTC----AG
--------------------ACAG-----------------CTC----CA
--------------------ACAG-----------------CTC----CG
ACATACACACACACACACAAACAC-----------------CTC----CG
--------------------ACAC-----------------CTC----AG
--------------------ACAC-----------------CTC----AG
-----------------------C------------------GC----AG
-----AGGGAGGGAGGACACACACCG---------------CTC----AG
-----AGGGAGGGAGGACACACACCG---------------CTC----AG
-----AGGGAGGGAGGACACACACCG---------------CTC----AG
----------------GGGCACAC-----------------CTC----AG
--------------------ACAC-----------------CTC----AA
------------------ACACACCC---------------GTC----AG
------------------ACACAC-----------------CTC----GG
--------------------CCACCC---------------GTC----AG
--------------ACACACACTC-----------------CTC----AG
---------------------CAG-----------------CTC----CG
---------------------CAG-----------------CTC----CG
--------------------CCAC-----------------CTC----CG
--------------------AAAG-----------------CTC----AG
-------------------CACGC-----------------CTC----TC
--------------------ACGCC----------------GCA----AT
--------------------ACAC-----------------CGC----TC
-----------------GTGGCGT-----------------CTC----AG
-----------------GTGGCGT-----------------CTC----AG
-------------CGGGGTGATGC-----------------CGC----AG
-------------CGGGGTGATGC-----------------CGC----AG
-------------CGGGGTGATGC-----------------CGC----AG
-------------CGGGGTGATGC-----------------CGC----AG
------------------GTACAC-----------------CTC----AG
-------------------CACGCCT---------------CTC----AG
----------------ACACACACCT---------------CTC----AG
--------------------ACGC-----------------CGC----AA
--------------------ACGC-----------------CGC----AA
--------------------ACGC-----------------CGC----AA
--------------------ACGC-----------------CGC----AA
--------------------ACGC-----------------CGC----AA
--------------------ACAC-----------------CTG----AG
--------------------ACAC-----------------CTG----AG
--------------------ACAC-----------------CTG----AG
--------------------A-AC-----------------CTT----AG
-------GTGGGGGCACGCCGCACCT---------------TGC----AG
-------GTGGGGGCACGCCGCACCT---------------CGC----AG
-------------G------------------------------------
----------------GGACACACCCCT-------------CTC----AG
-------------------GCTGC-----------------GTC----AG
------------------AGTCAC-----------------CTC----GG
----GCCCGCGAGAAGGGGCGTAC-----------------CTC----GG
--------------AGGGGGTGCC-----------------GCC----GC
--------------------ACCC-----------------GTC----AG
---------------GACACACACCT---------------CGC----TG
---------------GACACACACCT---------------CGC----TG
--------CAGCATGGACACACACCTCAG------------CTC----AG
-------------------CACACCT---------------CTC----AG
-------------------CACACCT---------------CTC----AG
--------------------ACACCTCAA------------CTC----AG
-------------------GACACGC---------------CTT----AA
-------------------GACACCCTT-------------TTC----AG
-------------------GACACCCTT-------------TTC----AG
-------------------GACACCCTT-------------TTC----AG
------------------CGACACGCAC-------------CTC----AG
----------------TAGCACACCT---------------CTC----AG
-------------------GACAC-----------------CTC----AG
-------------------GACAC-----------------CTC----AG
----------------------AC-----------------CTC----CG
------------------GGGCACCG---------------CCG----TG
---------------GACACACACCT---------------CTC----AG
-------------------GACAC-----------------CTC----AG
-----------------GAGTCAT-----------------C-C----TC
---GTAAAGGGAGGGGGCACACACCG---------------CTC----AG
---GTAAAGGGAGGGGGCACACACCG---------------CTC----AG
--------------------ACAC-----------------CTC----AG
-------------------GGCAC-----------------CGC----AG
------------------CGACACCCT--------------CAG----TG
------------------CGACACCCT--------------CAG----TG
------------------CGACACCCT--------------CAG----TG
-------------------GACTCT----------------CCA----TG
TGTCACGGGGCTGTTTATGGATCC-----------------TTG----TG
-------------TGGTGACACAT-----------------ATC----CG
--------------------ACGC-----------------CTC----AG
---------------CGGACGCACCCCT-------------CTC----GG
------------------GAACAC-----------------CTC----AG
-----------------------T-----------------CCT----AA
---------GGGATGGGGGCCTGC-----------------GTC----AG
--------------------ACAC-----------------CGC----AG
-GGGTGGGGTGGGGTGGCGCACACCC---------------TTC----AG
---GGGGGGGGGGGTGGCGCACACCC---------------TTC----AG
---------------------CAC-----------------CCC----AG
--------------GGTAGCACACCT---------------CTC----AG
--------------------ACACGCCT-------------CTC----AG
--------------------CCGC-----------------CTG----AG
--------------------ACAC-----------------CTC----CG
---------------CCCATACCT-----------------CTC----AG
------------------CAACAC-----------------CTC----TG
------------------CAACAC-----------------CTC----TG
------------------CAACAC-----------------CTC----TG
--------------------CCAC-----------------GTC----AT
------------------ACCCAC-----------------GTC----AT
----------------------AC-----------------ATC----TC
--------------------GCGC-----------------TCG----AT
--------------------AGAC-----------------CTC----CG
---------------------TAA-----------------CTG----CG
--------------GACGGCACACCG---------------CGC----AG
--------------GACGGCACACCG---------------CGC----AG
--------------GACGGCACACCG---------------CGC----AG
--------------------ATAC-----------------GTC----AA
----------------CGGGATAC-----------------GTC----AA
------------------ACCCAC-----------------GTC----AT
--------------------ACCCG----------------TTC----AG
-----------------GGGCTAC-----------------TGC----AG
--------------------AGAC-----------------CGT----AG
-------------------GAGT------------------CTC----TA
--------------------TCACGT---------------TCC----AG
--------------------TCACGT---------------CCC----AG
-------------CGAAGAAAAAAC----------------CCC----AG
-----------GGACGGAGGACATGC---------------CTC----CG
--------GGGGGACGGAGGACATGC---------------CTC----CG
------------TGCAGGAGACAC-----------------CTC----AG
-------------GCGGGAGATAC-----------------CTG----AG
--------------------------------------------------
--------------------ACAC-----------------ACT----AG
--------------------ACAC-----------------CTC----AA
--------AGGGAAGGAGGGGCAC-----------------CTC----AA
--------------------ACAC-----------------CTC----CA
--------------------ACAC-----------------CTC----CA
-----------GGTGTAAAGGCGC-----------------CTC----CA
-----------GGTGTAAAGGCGC-----------------CTC----CA
-------------GGGGAGGAGAC-----------------CTC----GA
------------GGGGGAGGAGAC-----------------CTC----GA
----------------AAAAACAC-----------------CGCGT--AG
----------------AACGACAC-----------------CTC----AG
--------------------ACAA-----------------CTC----GG
-------------------CACACATCC-------------CTC----CG
--------------GGGGGGACAT-----------------CTC----AG
--------------GGGGGGACAT-----------------CTC----AG
---------------GGGGGACAT-----------------CTC----AG
--------------------ATAT-----------------CTA----AG
-----------------GGAGCGC-----------------CTC----AG
-----------------GGAGCGC-----------------CTC----AG
---------------------CAC-----------------TTT----GG
------------------CGGCAT-----------------CTC----GG
------------------CGGCAT-----------------CTC----GG
--------------------TCAA-----------------CGC----GG
---------------TGGACGCACCC---------------CTC----CG
GTGTGTGTGTGTATATGTGGGCACGCCT-------------CTC----GG
------------------GCGCAC-----------------CTC----CG
--------------------ACAC-----------------CTC----AA
------------GGAGGAGCGCAC-----------------CTC----AA
----------GGATGGAGGGACAACCCCCCCTCCCC-----CTCC---TG
----------GGATGGAGGGACAACCCCCCCCCTCCCC---CTCC---TG
----------GGATGGAGGGACAACCCCCCCCCCCCTCCCCCTCC---TG
--------------------TCGT-----------------CTC----AG
-------------AACCTCACCAC-----------------CAA----CG
--------------------TCCA-----------------TGT----CG
--------------------ACAC-----------------CCC----AG
GTGTGTGTGTGTGTGTGGGCACGCCT---------------CTC----GG
--------------------ACGCCT---------------GTC----GG
GTGTGTGTGTGTGTGTGGGCACACCT---------------CTC----GG
GTGTGTGTGTGTGTGTGGGCACGCCT---------------CTC----GG
GTGTGTGTGTATATATGGGCACGCCT---------------CTC----GG
GTGTGTGTGTGTGTGTGGGCACACCT---------------CTC----GG
-------------------CGCAC-----------------CCC----AG
-------------GGGGGGCACAC-----------------CTC----TG
CGGGGGTGGAGGAAGGGCGCACAC-----------------CTC----CG
------------------TGGCGC-----------------CTC----AG
------------------TGGCGC-----------------CTC----GG
-----TGGTGATGGTGTGTGACACCCCT-------------CTC----GG
-----------------CGCCCAC-----------------TTC----GG
--------------------ACAC-----------------CTC----AG
------------GGAAAACGACAC-----------------CCC----AG
--------------------ACAC-----------------CCC----AG
--------------------AAAC-----------------CTC----AG
--------------------------------------------------
-----------------TGCGCAC-----------------CCC----AG
-----------------GGCGCAC-----------------CCC----AG
-----------------TGCGCAC-----------------CCC----AG
------------------AGAGAC-----------------CTT----GC
------------------GGGCAC-----------------CTC----GA
-------------------AGCGC-----------------CTC----GG
-----------------------------------------GGG----GG
------------------GGGGGC-----------------GCC----GG
------------------GTGCAC-----------------CTC----GG
--------------------GCGC-----------------CTC----GG
---------------------CAC-----------------TGC----GG
---------------------CGC-----------------CTC----GG
------------------TGACAC-----------------CTC----AG
-----------------AAGACACCC---------------CTC----AG
-----------------AAGACACCC---------------CTC----AG
-----------------AAGACACCC---------------CTC----AG
--------------------ACAC-----------------CTC----AG
--------------------ACAC-----------------CTC----AG
--------------------ACAC-----------------CTC----AG
---------------TCTACACACCT---------------CTC----CG
------------------GCAAACCT---------------CTC----GG
------------------GTGCAC-----------------CTC----GG
----------------AGGCACACCT---------------CTC----AG
----------------AGGCACACCT---------------CTC----AG
----------------GGACACAC-----------------CTC----GA
--------------------AAAC-----------------CTC----GG
TGCGACAGGGGCCGGGGGCGAGCG-----------------GTG----CC
-----------------GACACAC-----------------CTCAG--AG
-------------------GACAC-----------------CTTGC--AG
-------------------AAAAC-----------------CTCAG--AG
----------------AAAAATAC-----------------CTC----AG
----------------AAAAATAC-----------------CTC----AG
--------------------AGAC-----------------CTC----AG
-------------------TAAAC-----------------CTC----AG
-----------------------------------------CTC----CG
------------------CATGCG-----------------CGC----AA
------------------CCACACCG---------------CTC----AG
------------------CCACACCA---------------CTC----AG
------------------CCACACCG---------------CTC---AGG
--------------------ACACGCA---------------------AG
------------------GCACCT-----------------CTC----AG
-------------GGAGTGCACCT-----------------CTC----AG
-----------------TGCACCCGT---------------CTC----AA
--------------------ACAC-----------------CTC----GG
------------------CAACACCT---------------CGC----AG
------------------GGACACCCCT-------------CTC----GC
----------GGGAGGATGGAACTC----------------CTCAC--AG
----AGGGGAGGGAGGGGGCAACC-----------------CTCAC--AG
-------------GGGGGGGGCAC-----------------CTCAC--CG
------------------CCACGC-----------------CCC----TG
------------------CCACGC-----------------CCC----TG
---------------GGGACACACCG---------------CAC----AG
---------------GGGACACACCG---------------CAC----AG
---------------GGGACACACCG---------------CAC----AG
GTGGGGAGGTCGTTTGTCACACAC-----------------CTC----GG
GTGGGGAGGTCGTTTGTCACACAC-----------------CTC----GG
------------------A-CCAC-----------------CTCAC--AC
---------------GGGGGGCAC-----------------TTC----AG
--------------------ACACTT---------------TGC----CG
GGGAAAGGGGGTGGGAGAGAGCAC-----------------CAC----AG
-----------------------C-----------------CTC----AG
--------------------ACAC-----------------CTC----CG
--------------AAGCGCCTCA-----------------GTG----CG
--------------------ACAC-----------------CTC----GG
----------------CAGCACACCT---------------CTC----AG
------------------GCATAC-----------------GTC----AG
TGGTGATCAGGGAGTGGGGCATAC-----------------GTC----AG
TGGTGATCAGGGAGTGGGGCATAC-----------------GTC----AG
------------------CAACAC-----------------CTCGC--AG
----------------GGGGACTC-----------------CTCAC--AG
------------------CCACGC-----------------CCC----TG
--------------------ATAC-----------------CAC----TG
-------CCGGGGAGAGCCGATAC-----------------CTCAC--CG
---------------GCGACACAC-----------------CTCAC--CG
---------------GAGACACAC-----------------CTCAC--CG
-----------------CCGACAC-----------------CTCAC--CG
-----------------CCGACAC-----------------CTCAC--CG
------------------CGACGC-----------------CTC----TG
---------------------CGC-----------------CTC----CG
--GGCTCCCAGGATAGGGGGACGC-----------------CTC----CG
GGGAAAGGGGGTGGGAGAGAGCGC-----------------CAC----AG
GGGAAAGGGGGTGGGAGAGAGCGC-----------------CAC----AG
--------------------------------------------------
----------------GGGCACAC-----------------CTC----AG
-----------------------------------------GCA----AG
--------------------GCAT-----------------CCC----AG
-----------------GGAACGC-----------------CTCCC--AG
---------------GGGGAACGC-----------------CTCCC--AG
-------------GGGGGGAACGC-----------------CTCCC--AG
------------------TATGCT-----------------AGT----GA
-------------------GACGC-----------------CGC----CA
-----------------------------------------CCC----AG
--------------------ATAG-----------------CTG----AG
----------------AAACACAC-----------------CGC----AG
------------------TCACATCC---------------GCA----CC
-------------------AACAC-----------------CTC----AC
-----------------CACACACCT---------------CTC----GG
--------------------ATAC-----------------TTC----AT
-------------------GAAAC-----------------CTC----AC
-------------------GAAAC-----------------CTC----AC
------------------GGGCAC-----------------CTC----AC
-------------------GGCAC-----------------CTC----AC
---------------GAAGGGCAC-----------------CTC----AC
------------------TTACAG-----------------CGC----AG
------------GGCGGGGCACAT-----------------CTC----AG
--------------------ACAC-----------------TTC----AG
-------------AGGGAGCACAC-----------------CGC----AG
-------------------CTTGC-----------------CTCAC--AG
-------------------AGCAC-----------------CAA----CG
-------------------AACAC-----------------CCC----AG
--------------------CCAC-----------------CTC----AG
--------------------ACGC-----------------CTC----AG
--------------------CTAC-----------------CCC----CG
--------------------CTAC-----------------CCC----CG
---------------------CAC-----------------TTC----AA
--------------------ACAC-----------------CTC----AG
--------------------ACGC-----------------CTC----AC
--------------------GCAC-----------------CTC----AC
-------------------GACAC-----------------CTC----AG
-------------------GACAC-----------------CTC----AG
--------------------ACAC-----------------CTC----AG
------------------CCACCC-----------------CCG----TG
---------------CCTGGCCGA-----------------CAA----AG
------------------AAACAC-----------------CTC----AG
-------------------AGCAC-----------------CTCAA--TG
-------------------AACAC-----------------CTCAA--TG
-------------------AACAC-----------------CTCAA--TG
--------------------ACAC-----------------TTC----AA
-----------------------------------------CAC----AA
-----------------------C-----------------CTC----AC
-----------------GCTATAC-----------------CTTCC--CG
------------------CTATAC-----------------CTTCC--CG
------------------CTATAC-----------------CTTCC--CG
------------------CTATAC-----------------CTTCC--CG
----------------------AC-----------------ATA----TC
----GGGAGGGAAGAGATGCATGC-----------------TTC----AG
--------------------ACAC-----------------TTC----AG
-------------AGGGAGCACAC-----------------CGC----AG
-----------------AGCACAC-----------------CGC----AG
-------------AGGGAGCACAC-----------------CGC----AG
--------------GTAAACACAC-----------------CGC----AG
----------------------AT-----------------ATC----TC
-----------------CGCAAAC-----------------CTCAC--GG
-----------------CGCAAAC-----------------CTCAC--GG
-----------------CGCAAAC-----------------CTCAC--GG
-------------------GAGACTG---------------CTC----AG
------------------ATACAC-----------------ACG----TG
------------------GGGCGC-----------------CGC-----G
------------------GGGCGC-----------------CGC-----G
------------------GGGCGC-----------------CGC-----G
-------------------CACCC-----------------CGC-----G
-------------------CACCC-----------------CGC-----G
-----------------GGAGGAT-----------------ACC----TC
--------------------ACAC-----------------CTC----GG
--------------------ACAC-----------------CTC----AG
-------------AGGGGAGGGGC-----------------ATA----AG
--------------------ATAC-----------------TTC----AA
-------------------GGCAA-----------------CTC----AG
--------------------ACAC-----------------CTC----GG
-----------------GGGACAC-----------------CTC----GG
-------------------GACAC-----------------CTC----GG
--------------------GCAA-----------------CGC----AG
-------------TTGGAAAACAC-----------------CCC----AG
-----------------GGGATAG-----------------CTC----AA
------------------GCCCAT-----------------GTC----AG
------------------GCCCAT-----------------GTC----AG
-------------------AACAC-----------------GTC----CG
-------------------AACAC-----------------GTC----CG
-------GAAAGGAGTGGATACAT-----------------CTCAG--TG
-------------------GACAC-----------------CTC----AG
-------------------GACAC-----------------CTC----AG
-------------------GACAC-----------------CTC----AG
-------------------GACAC-----------------CTC----AG
-------------------GACAC-----------------CTC----AG
-------------------GACAC-----------------CTC----AG
-----------------GGGGCAC-----------------CTCGG--CG
------------------AGACTC-----------------CA-----GC
--------------------ACGC-----------------ACC----AG
--------------------ACAC-----------------CTC----TA
--------------GTGGGCACAC-----------------CTCTG--TG
ACTTCTGCTGACAAGAGAACACAC-----------------CTG----AC
-------------------CACAC-----------------CTG----AC
--------------------ATAC-----------------CTC----AG
--------------------ACAC-----------------CTC----AG
------------------------------------------------CG
------------------ATACAC-----------------ATC----AG
-------------------AACAC-----------------CTC----AG
------------GTGTGGGCACACCT---------------CTC----AG
--------------------GCAC-----------------GTC----AG
--------------------GCAC-----------------TTC----CG
-----------------AGCAGAGCTT--------------CTC----AC
------------------AGACAC-----------------CGC----GC
--------------------ACAC-----------------CTC----GG
--------------------ACAC-----------------CTC----GG
-------------------AACAC-----------------ATC----AG
--------------------ACAGAAGGTG-----------CTGC---AC
--------------------ACAC-----------------CTC----AG
--------------------ACAC-----------------CTC----AG
--------------------ACAC-----------------CTG----AC
--------------------GCAC-----------------GCC----AG
--------------------GCAC-----------------GCC----AG
-------------------CTCCC-----------------CTC----CG
--------------------ACAC-----------------CTC----AG
-----------------CACACAC-----------------TTC----AG
--------------------GCAC-----------------CCC----AA
---------------GGGACACACTT---------------CTC----AG
-------GTTGGGGGAGGACATACCT---------------ATC----AG
--------------------AAAT-----------------GTC----AG
-------------------GACAC-----------------GTC----AG
-CCTCAGGTGACATGCAGACGCAC-----------------CTCC---AT
--------------------TCGCC-------------------------

TGCGCGA----TGCCACAGGG--TCCAGCG-------------CCTACGG
C--GTGG----TGA--CCGGG--TCACGTG-------------CGTACG-
C--CCAG----CGTC-CAGGG--TCCAGTA----------------GCCC
C--GTAA----CATCACAGAG--TCCAGCG---------------C-CCT
C--CTGC----TCTT-CAGGG--TTCGGTG---------------C-CTA
CGCGTGG----TATCGTAGGG--CACAGCA--------------TCTCC-
G--AGGG----CGT--CAGGG--CCCTGCA---------------CATTC
T--GTGG----TATCTCAGGG--TGCAAGA----------------GCCC
TGCGTGG----TATCTCAGCG--CCCACTG---------------CACCC
GGCCTGG----TGTCTCAGCG--TCCAGTG---------------CGCCC
TGCGTGG----TATCTCAGGG--TCCAGCG---------------CACCC
CGAGTCG----TCTCGCAGGG--CTCCGTGC-----------ACCCACCC
TGCGCGG----CATCGCAGGG--CCCTGTG---------------CACGC
TGCGTGA----TATCACAGGG--TCCGGTA---------------CACCT
TGTGTGG----CATC-CAGGG--CCCACT-----------------ACCC
CGCGTGG----GATCTCAGGG--CTCGACA----------------GCCC
C--GTGG----CATCTCAGGA--CACAAGGG------AGGGAGGGGGCCA
CGCGTGG----CATCCCAGGG--CCCAGCG---------------CACCC
CGCGTGG----CATCCCAGGG--CCCAGCG---------------CACCC
CGCGTGG----CATCCCAGGG--CCCAGCG---------------CACCC
CGCGTGG----CATCCCAGGG--CCCAGCG---------------CACCC
TGCGTGGGGG-TAACCTAGGC--TGCAGGG---------------CAGCC
TGCGTGGGGG-TAACCTAGGC--TGCAGGG---------------CAGCC
TGCGTGGGGG-TAACCTAGGC--TGCAGGG---------------CAGCC
TGCGTGGGGG-TAACCTAGGC--TGCAGGA---------------CAGCC
TGCGCGG----CATCGCAGGG--CCCGGTG---------------CACGC
TGCGGGG----TGGTCGGGGG--GTGGGTCC----------AAGAATCCC
--------------------------------------------------
TGCGCGT----CATCACGCGG--CCCAGCG--------------GCCCCC
TGCGCGT----CATCACGCGG--CCCAGCG--------------GCCCCC
TGCGTGG----CGTCTCAGGC--GCCAGTGC-----------TCTCACCC
CTGGTGG----TCG--CAGGC--AC--GCA---------------CACCT
TGCGTGG----CATCTCAGAG--CCCAGTG---------------C-CCC
TTTGTGG----TTTCCAAGGG--CCCGGTG---------------CACCC
C--GTGG----TATCACAGGG--TCCAGTG---------------C-CC-
C--GTGG----TATCACAGGG--TCCAGTG---------------C-CC-
AA-GGCC----TTG--CAGGCGCCTCTCTGC--------ATGTGGCTCCC
CGCGTGG----TGCCTCAGCG--GCCAGTG---------------CACGC
CGCGTGG----TGCCTCAGCG--GCCAGTG---------------CACGC
CGCGTGG----TGCCTCAGCG--GCCAGTG---------------CACGC
CGCGTGG----TGCCTCAGCG--GCCAGTG---------------CACGC
TGCGTGG----TATCCGAGGG--TCCGGTG---------------CACCC
C--ACGG----TAT--GCGTG--TTC-GT----------------TACCC
C--ACGG----TAT--GCGTG--TTC-GT----------------TACCC
AGTGTGG----TATCGCAGGG--TCAAGTGC-------------CTACG-
CGCGCCG----CATCTCAGAG--TCCAGTAC------------CCCTCCC
TGCGCCG----CATCTCAGAG--TCCAGTAC------------CCCTCCC
--------------------------------------------------
C--GCGG----TGT--GAGGG--TCGAGTAC-------------CCACCC
C--GCGG----TGT--GAGGG--TCGAGTAC-------------CCACCC
T--GTGG----TATC-CAGGG--TCCAGTAC-------------CCATCA
T--GTGG----TATC-CAGGG--TCCAGTAC-------------CCATCA
T--GTGG----TATC-CAGGG--TCCAGTAC-------------CCATCA
TGTGCCG----TATCTCAGAG--TCCAGTAC------CCCTCCCTCGCCC
TGCGCGG----GATCACAGGG--CTCA-TG---------------CACGC
C--GGGG----TGG--CAGGG--TGCAGTG---------------CATCC
TGTGCCG----TATCTCAGAG--TCCAGTAC------------CCCTCCC
CGCGTGG----TGTCTCAATG--TCCAGTGA-----------TGCCAC--
CGCGTGG----TGTCTCAATG--TCCAGTGA-----------TGCCAC--
TGCGTGC----TGTCTCCGGG--TCCGGTAC--------------AACCG
TGCGTGG----TGTCTTAGGG--CCCGGCA---------------CACAC
TGCGCGG----CACCTCGGCG--TCCAGCGC-------------CTACG-
GAACCCAA---AACGCTGTAC--TGCAGCAT-----------TAAATCTC
TGCGCGG----CACCTCGGCG--TCCAGCGC-------------CTACG-
TGCGTGG----CATTTCAGGG--TCCAGTA---------------CCCCC
TGCGTGG----CATTTCAGGG--TCCAGTA---------------CACCA
TGCGTGC----TGTCTCCGGG--TCCGGTAC--------------AACCG
TGCGTGC----TGTCTCCGGG--TCCGGTAC--------------AACCG
TGCGTGC----TGTCTCCGGG--TCCGGTAC--------------AACCG
TGCGCGG----CACCTCGGCG--TCCAGCGC-------------CTACG-
G--GTGG----CTT--CAGTG--TCCGGTGC-------GT----------
C--ATGG----TGC--TAGGA--CGAAGCAT-------TG----------
TGCGTGG----CAC--CGGTG--CCCAGTGC----------------CTT
CGCGTGG----CATCTCCGGG--TCCGGTGT----------------GTC
GTCGTGA----AACCTCAGGG--TCCTGTGT--------------CAGCC
CTTGTGA----TAACTCAGGG--TGCAGGCC---------------CCCC
--------------CGCAGGG--CCCGGTGT----------------GTC
AATGACA----CACCGCAGGG--CCCGGTGT----------------GTC
TGCGTCG----TATCATAATG--CTCAGTGC----------------CCC
AGCATGA----CATCGCAGGG--CCCGGTGT----------------GTC
TGCGTCG----TATCATAATG--CTCAGTGC----------------CCC
AGCATGA----CATCGCAGGG--CCCGGTGT----------------GTC
-----------CATCTTGCTC--TGTTGTGG----------------CTT
CGCGTGG----CATCTCCGGG--TCCGGTGT----------------GTC
CGCGTGG----CATCTCCGGG--TCCGGTGT----------------GTC
CGCGTGG----CATCTCCGGG--TCCGGTGT----------------GTC
CGCGTGG----CATCTCCGGG--TCCGGTGT----------------GTC
CGCGTGG----CATCTCCGGG--TCCGGTGT----------------GTC
CGCGTGG----CATCTCCGGG--TCCGGTGT----------------GTC
CGCGTGG----CATCTCAGGG--GTCAGCGC----------------CCC
CGCGTGG----CATCTCCGGG--TCCGGTGT----------------GTC
CGCATGG----CACCTCAGGG--GCCAGCA---------------CATCC
CGCATGG----CACCTCAGGG--GCCAGCA---------------CATCC
--------------------------------------------------
C--GCGA----TAGCGCGCGG--TCCAGTA---------------C-CCA
C--GCGA----TAGCGCGCGG--TCCAGTA---------------C-CCA
TGCTCGG----GATTTCATCG--CTCTCTCC-----------ATGTGCCC
TGCGTGG----TATTACCGGG--TACCGTG---------------CACCC
G--GTGG----TGG--CAAAG--CCCAGTA---------------CAC--
G--GTGG----TGG--CAAAG--CCCAGTA---------------CAC--
C--GTGC----CGT--AGCGG--CCCAGCA---------------C-CC-
C--GTGC----CGT--AGCGG--CCCAGCA---------------C-CC-
T--GCGA----TAGCGCGCGG--TCCAGTA---------------C-CC-
C--GCGA----TAGCGCGCGG--TCCAGTA---------------C-CC-
TGCGCCG----TGTCTCAGGC--CCCAGCAT--------------C-CC-
TGCGTGG----CGTCGCAGAG--TCCAGTG---------------CACCC
TGCGTGG----CGTCGCAGAG--TCCAGTG---------------CACCC
TGCGTGG----TACCTCATGG--CCCAGCG---------------CACCC
T-TCTCG----CTCCGGTCTC--TCCACCCT-TTTCCTCCTTCTGCACCG
CGTGCAA----CGTTTTGGGG--CTTTTTTT------CTATGTATCTGCC
TGCGCTG----TATCTCGGGG--TCCAGTG---------------C-CCC
CGCGTGG----TGTCTCAGGA--CCCCGTG--------------CAACCC
CGCGTGG----TGTCTCAGGA--CCCCGTG--------------CAACCC
CGCGTGG----TGTCTCAGGA--CCCCGTG--------------CAACCC
CGCGTGG----TGTCTCAGGA--CCCCGTG--------------CAACCC
CGCGTGG----TACCTCATGG--CCTCGTG---------------CACCC
CGCGTGG----TGTCTCAGGA--CCCCGTG-------CAACCCTCCACCT
CGCGTGG----TACCTCATGG--CCTCGTG--CAACCCTTCCATCCACCC
TACGTGG----TGTCACAGAG--TCCAGTG-------------CCCTCCT
TGCGTCG----CACCACAGGC--TCCCGTG----ACCCCACGAACCACCA
CGCGTGC----GCCTCCAGGT--CGATCTTG-TTTCCTCCTTCTGCACCG
TGCGTGG----TATC-CAGGA--CC-AGTA---------------C-CG-
G--GTGG----TGTCACAGTT--CCCAGCA---------------CACCC
CGCGCGG----CATCTCAGGG--TCCAGTG---------------C-CCC
CGCGCGG----CATCTCAGGG--TCCAGTG---------------C-CCC
CGCGCGG----CATCCCAGGG--TCCAGTGG--------------C-CCC
CGCGCGG----CATCCCAGGG--TCCAGCG---------------GGCCC
CGCGTCG----CTCCTCAGGG--CCCAGTG---------------CAGCC
TGCGTGG----TATCTAAGGT--TCCAGTG---------------C-CT-
CGCGCGG----CATCCCAGGG--TCCAGCG---------------GGCCC
CGCGCGG----CATCCCAGGG--TCCAGCG---------------GGCCC
CGCGCGG----CATCCCAGGG--TCCAGCG---------------GGCCC
TGTTTGG----TGT--CTGTT--TTTACTA---------------C-CCC
CGTGTGT----GGTCTCATGG--TTCAGTG---------------C-CCT
G--GTGG----TGTCACAGTT--CCCAGCA---------------CACCC
T--GTGT----GGTCTCATGG--TTCAGTG---------------C-CCC
----TTG----CGT--CAGGA--TTCAGTG---------------C-CCT
CGTGTGT----GGTCTCAGGG--TCCGGTG---------------C-CCT
----GGT----TGTCTCAGGG--TTCAGTG---------------C-CCC
CGTGTGT----GGTCTCATGG--TTCAGTG---------------C-CCC
CGTGTGT----GGTCTCATGG--TTCAGTG---------------C-CCC
CGTGTGT----GGTCTCATGG--TTCAGTG---------------C-CCT
CGCGCCG----TAT--CAGGG--CTCAGTG----------------ACCC
CGCGCCG----TAT--CAGGG--CTCAGTG----------------ACCC
CGCGCCG----TAT--CAGGG--CTCAGTG----------------ACCC
CGCGCCG----TAT--CAGGG--CTCAGTG----------------ACCC
GGTGTGG----TATCGCAGCG--TCCAG--C--------------CTTCC
T--GTGG----CAT--CAGTG--CCCAGTCC-------------ACACCC
T--GTGG----CAT--CAGTG--CCCAGTCC-------------ACACCC
TGCGTGG----TATCTCGCGG--TTCAGCA---------------CATCC
CAATAGA----CATCTCAGGC--TCCAGCG---------------CGCAC
TGCGTGG----CATCTCAGGC--TCCAGCG---------------CGCAC
TGCGTGG----CATCTCAGGG--TCCAGCG---------------CGCAC
TGCGTGG----CATCTCAGGC--TCCAGCG---------------CGCAC
TGCGTGG----CATCTCAGGC--TCCAGCG---------------CGCAC
TGCATGG----CATCACAGGG--CCCAGCA---------------CACCC
TGCATGG----CATCACAGGG--CCCAGCA---------------CACCC
GGCGCGG----CGTCTCAGGG--TGCAGTGC------------AGCAGCC
GGCGCGG----CGTCTCAGGG--TGCAGTGC------------AGCAGCC
TGCGTGG----CGTCTCAGGG--TGCAGTGC------------AGCAGCC
GGCGCGG----CGTCTCAGGG--TGCAGTGC------------AGCAGCC
GGCGTGG----TGTCTCAGGG--TGCAGTGC------------AGCAGCC
TGCGCGG----CATC-CAGGG--CGCCGCA---------------C----
CCTGTGGCG--TATC-CGGGG--TTTTGTA---------------C-CC-
TGCGTGG----CACC-CAGCG--CGC-GCG---------------CACAC
TGCGTGG----CACC-CAGCG--CGC-GCA---------------CACAC
TGAGCGG----CATCTCGGGG--TCCAGGA---------------C-CCC
TGAGCGG----CATCTCGGGG--TCCAGGA---------------C-CCC
TGCGTGG----CAT---------TC-AGTG---------------CACAC
T-CGTGG----CAT---------TC-AGTG---------------CACAC
C--GTGG----T-T-TCAGGG--CCAAGTG---------------CTCC-
TGCATGG----TGT--CAGGG--TCCAGTA---------------CACCC
T--ATGC----TATCACAAGG--TCCAGTAT--------------CTCC-
TGCGCGG----CATC-CAGGG--CGCCG-----------------CACTC
TGCGCGG----CATC-CAGGG--CGCCG-----------------CACTC
TGCGCGG----CATC-CAGGG--CGCCG-----------------CACTC
TGCGCGG----CATC-CAGGG--CGCCG-----------------CACTC
TGCGCGG----CATC-CAGGG--CGCCG-----------------CACTC
TGCGCGG----CATC-CAGGG--CGCCG-----------------CACTC
TGCGCGG----CATC-CAGGG--CGCCG-----------------CACTC
CGCGTGG----TGTTACAGGG--TCCCGTA---------------AACCC
TGCGCCG----TATCTCAGGG--CCCAGCG---------------CACCC
TGCGTGG----TATCACAGGG-GTCCAGTG---------------CATCT
TGCGTGG----TATCACAGGG-GTCCAGTG---------------CATCC
TGCGTGG----TATCACAGGG-GTCCAGTG---------------CATCC
TGTGTGG----TAT--TGGTG--TCCAGCG---------------C-CCC
TGCGTGG----TATCACGGGT--TCCACTGC-------ACACGCACACCT
TGCGTGG----TATCACGGGC--TCCACTGC-------ACACGCACACCT
C--GTGG----TAT--CAGAG--GCCGGTAC----------------CTC
TGCGCCG----TATCTCAGAG--CCCAGCGC---------------ACCC
TGCGTCG----TATCACGGGC--TCCACTGC-------ACACGCACACCT
C--CTGG----TCT--CAAGA--TCTAATGC----------------CC-
CGCGTTG----TATCACCGGC--TCCACTGC-------ACACGCACACCT
C--GTGG----TATCACAGGG--TCCGGGG----------------ACCC
C--GTGG----TATCACAGGG--TCTGGGG----------------ACCC
TGCGTGG----GAG--AAAGA--TGCTGGGCCCTTGTGTGCCATGTAGCC
TGTGTGG----CATC-CAGGG--CCCACTA---------------C-CC-
C--GTGG----CATCCCAGGG--TCCGGTGC-------CCCCACACACCT
C--GTGG----CATCCCAGGG--TCCGGTGC-------CCCCACACACCT
C--GTGG----CATCCCAGGG--TCCGGTGC-------CCCCACACACCT
C--GTGG----CATCCCAGGG--TCCGGTGC-------CCCCACACACCT
TGCGTGG----CATC-CAGGG--CCCACTA---------------C-CC-
C--GTGG----TATCACAGGG--CACACCAG-----------TGCCACC-
CGCGTGG----CATT-CAGGG--CCTAGTA---------------CTCT-
TACGTGA----CATCTCGCGA--TCCAGCA---------------C-C--
TGCGTGA----CATCTCGCGA--TCCAGCA---------------C-C--
TGCGTCG----CATCTCGGAA--CCCGGTC---------------C-CCC
TGTGTGG----CATCTCGGGA--TCCGGTG---------------C-CCC
TGCGTCG----CATCTCGGAA--CCCGGTC---------------C-CCC
TCCGTGG----CATCTCGGGA--TCCGGTG---------------C-CCC
TGTGTGG----CATCTTGGCA--TCCGGTG---------------C-CCC
TGTGTGG----CATCTTGGCA--TCCGGTG---------------C-CCC
TGCGTCG----CATCTCGGGA--CCCGGTG---------------C-CCC
C--ACGG----CAT--CAGAG--TCCGGCA---------------C-TC-
TGTGTGG----CATC-CAGGG--CCCACTA---------------C-CC-
TGTGTGG----CATC-CAGGG--CCCACTA---------------C-CC-
-----GG----TAATGTAGGG-GTCCGGTA---------------CTCCC
CGCATGG----CATCCCAGGG--GTCGGTA---------------CTCCG
TGCATGG----CATCGCAGGGTCTCACGTA---------------CACAC
CGCATGG----CATCCCAGGGTCTCACGTA---------------CACAC
TGCATGG----CATCCCAGGGTCTCACGTA---------------CACAC
TGCATGG----CATCGCAGGGTCTCACGTA---------------CACAC
TGCATGG----CATCCCAGGGTCTCACGTA---------------CACAC
A--AGAG----TATCCCGAGGTCTCCCGTA---------------CACCC
TGCGTGG----TATCCCGGAGTCACCCGTA---------------CACCC
--------------------------------------------------
----------------------------------------------ACTC
CGCGTGG----CATCTCAGGTGGGGGGGT-C-------ATTCGTGCACCC
CGCGTGG----CATCTCAGGT-GGGGGGT-C-------ATTCGTGCACCC
TGCGAGG----CATCTGAAGG--GCCAGTG---------------CACCC
--------------CTGAGGG--TCCAGTG---------------CACCC
GGCGCGA----TATCACAGTG--TTCCGCA---------------CACCG
TGCGCGC----TATCTC------TCGCATG---------------CACAC
--------------------------------------------------
GGCGTGT----TGTC-CAGTG--TCAAGTAC------------CCCGCTC
CGCGCGG----CATCTCAGGG--CCCAGCGA----------CCCCCACCC
CGCGCGG----CATCTCAGGG--CCCAGCGA----------CCCCCACCC
CGTGCGG----TATCTCGGGG--CCCAGCG---------------C-CCC
CGTGCGG----TATCTCGGGG--CCCAGTG---------------C-CCC
CGTGCTG----GTG-GCAGCA--TGGACACG--------TTGAAGAACGA
C--GTGC----TAT--CAGGG--CCCGGCG---------------CACCC
C--GTGC----TAT--CAGGG--CCCGGCG---------------CACCC
GGCGCGA----TATCACAGTG--TTCCGCA---------------CACCG
--------------------------------------------------
TGCGCGG----CCTCACAGGG--TCCGGCG---------------CACTC
TGCGCGG----CCTCACAGGG--TCCGGCG---------------CACTC
TGCGTGG----CCTCACAGGG--TCCGGCG---------------CACCC
TGCGCGG----CCTCACAGGG--TCCGGCG---------------CACTC
TGCGCGG----CCTCACAGGG--TCCGGCG---------------CACAC
C--GTGG----CATCTGAGGG--TCCCGCAC-------------CCAGCT
TGCGTGG----CATCTGAGGG--TCCCGCAC-------------CCAGCT
TGCGTGG----CATCTGAGGG--TCCCGCAC-------------CCAGCT
TGCGTGG----CATCTGAGGG--TCCCGCAC-------------CCAGCT
TGCGTGG----CATCTGAGGG--TCCCGCAC-------------CCAGCT
TGCGTGA----CATCTCCGGT-GCCCTGCAC---------------ATCA
TGCGCGG----CCTCACAGGG--TCCGGCGC---------------ACTC
TGCGCGG----CATCGCAGGG--TCCAG-----------------CACCC
TGCGCGG----CATCGCAGGG--TCCAG-----------------CACCC
TGCGCGG----CATCGCAGGG--TCCAG-----------------CACCC
TGCGCTG----CATCGCAGGG--TCCAG-----------------CACCC
TGTGTGG----CATCTTAGGG--TCCAG-----------------CACCC
C--GTGG----CATCTCAGGG--TCCAG-----------------CACCC
GGCGCAA----CGT--CAGGG--TCCAG-----------------CACCC
TGCGCGG----CATCGCAGGG--TCCAG-----------------CACCC
TGTGCGC----GGCCGCAGGG--TCCAG-----------------CACCC
-GCGCGG----TATCTCAGTG--CTCAGTG---------------C-CTC
TGCGCGG----CCTCACAGGG--TCCGGCG---------------CACTC
TGCGCGG----TATCGCAGGG--TGCAGTA---------------CTCCC
TGCGTGG----TATCGAAGGG--TCCGGTA----------------ACCT
TGCGTGG----TATCGAAGGG--TCCGGTA----------------ACCT
CGCGTGG----CGTCTCAGGG--CCCAGCG----------------ACCC
CGCTGGG----CATCTCAACG--CCCGGTG---------------CACCC
CGCGTGG----CATCTCAGGG--CCCAGCG----------------ACCC
CGCGTGG----CGTCTCAGGG--CCCAGCG----------------ACCC
CGCGTGG----CATCTCAGGG--CCCAGCG----------------ACCC
CGCGTGG----CGTCTCAGGG--CCCAGCG----------------ACCC
CGCGTGG----CGTCTCAGGG--CCCAGCG----------------ACCC
CGCGTGG----CGTCTCAGGG--CCCAGCG----------------ACCC
CGCGTGG----CATCTTAGGG--TGCAGCAT----------------CCC
TGCGTGC----TATCTCAGGG--TGCGGTGA----------------CGC
TGCGTGA----CAT----------GCACTG---------------C-CCG
TACGTGG----TATCTTAAGG--TGCACTG---------------C-CCG
TGCGTGG----TAACTCCGGA--CCCCGTG---------------CCCCC
TGCGTGG----TAACTCCGGA--CCCCGTG---------------CCCCC
TGCGTGG----TAACTCCGGA--CCCCGTG---------------CCCCC
CGCGTGG----CATCTCAGGG--CCCAGCGA--------------CCCCG
C--GCGC----CAT--CCTTG--TCCAC-----------------CATCC
C--GCGC----CAT--CCTTG--TCCAC-----------------CATCC
C--CTGG----TAG--CAGGG--TCTAC-----------------CACCT
TGGGCGG----TG-CTCAGGG--TCC-GCGG-------------CCAC--
C--CTGG----TAG--CAGGG--TCTAC-----------------CACCT
TGGGCGG----TG-CTCAGGG--TCC-GCGG-------------CCAC--
TGCGTGC----TATCGCAGGG--TCCAGTGC-------------CCACCC
-----------CATCGCAGGG--TCCAGTGC-------------CCACCC
C--CTCA----CATCGCAGGG--TCCAGTGC-------------CCACCC
TGCGTGC----TATCGCAGGG--TCCAGTGC-------------CCACCC
C--GGGG----TGG--CAGGG--TGCAGTG---------------CATCC
C--TTCG----TATCTCAAGG--TTCAGAG---------------C-CCC
ACGGTGA----TATTCCAGGA--CCCAACG---------------C-CCT
TGCGTGG----TATC-CGCGG--TCCAGTA---------------C-CCC
TGCGTGG----TATC-CGCGG--TCCAGTA---------------C-CCC
TGCGTGG----TATC-CGCGG--TCCAGTA---------------C-CCC
TGCGTGG----TATC-CGCGG--TCCAGTA---------------C-CCC
CGCGTGG----CATCTCAGGG--TCGAGCA---------------CACCC
CGCGTGG----CATCTCAGGG--TCGAGCA---------------CACCC
TGCGTGGGGGGTATC-CAGGG--TCCAGTGC---------GCACTCACAC
TGCGTGG----TATC-CAGGG--TCCAGTGC---------GCACTGACAC
TGCGTGG----TATC-CAGGG--TCCAGTGC---------GCACTCACAC
TGCGTGG----TATC-CAGGG--TCCAGTGC---------GCACTCACAC
TGCGTGG----TATC-CAGGG--TCCAGTGC---------ACACACACAC
TGCATGG----CATCTCAGGG--CCCAGTGC-----------GTTCAC--
CGCGTGGCA--CATCTCAGGG--CCCAGTGC-----------GTTCAC--
TTCGTGG----CATCTCAGGG--CCCAGTGC-----------GTTCAC--
CGCGTGG----CATCTCAGGG--CCCAGTGC-----------GTTCAC--
CGCGTGG----CATCTCAGGG--CCCAGTGC-----------GTTCAC--
CGCGTGG----CATCTCAGGG--CCCAGTG-----------CGTTCAC--
TGCGTCG----TACCTCAGGG--TCCAGCA---------------CACCC
TGCGTCG----TACCTCAGGG--TCCAGCA---------------CACCC
TGCGTCG----TACCTCAGGG--CCCAGCA---------------CACCC
TGCGTCG----TACCTCAGGG--TCCAGCA---------------CACCC
TGTGTCG----CACCTCAGGA--TCAAACA---------------CACTC
AGCGCGG----CATCGCAGGG--TCAGGCA-------------CCCACGA
C--CCCG----CAT--CGGGG--GCCAG-AG---------------ACCC
C--GTGG----CAT--TGGAG--ACGCCCAC-------------CCACTC
TGTGTCG----AATCACGCGG--CCCGGCT---------------CACTC
CGCGTGG----TATGACAGGG--CGCCGTGT---------------ATTT
TGCGTGG----TATGACAGGG--CGCCGTGT---------------GTTT
TGCGCGG----CATCACAGGG--TCCAGTG------------ATTCACCC
TGCGCGG----CATCACAGGG--TCCAGTG------------ATTCACCC
TGCGCGG----CATCACAGGG--TCCAGTG------------ATTCACCC
TGCGTCA----TATCTCAGGG--TCCACTAC-------------CCACGC
TGCATCG----TATCTCAGGG--TCCACTAC-------------CCACGC
TGCGTCG----TATCTCAGGG--TCCGCTAC-------------CCACGC
CGCGTGG----TATGACAGGG--CGCCGTGT---------------ATTT
TGCGTCG----TATCTCAGGG--TCCGCTAA-------------CGACGC
TGCGTCG----TATCTCAGGG--TCCGCTAA-------------CGACGC
T--GTCG----TATCTCAGGG--ACCAGTAC-------------CCAC--
C--GTGT----TCT--CACGG--TCCAGTG---------------C-CCC
TGCGCGG----TGTCTCAGGG--CCCAGTGA--------------C-CCC
G--GTGGG--------CCCGG--TGGAAAGG-----GGGCGCCCGGGCCC
CGCGTGG-----------------------C----------ACTTCACCA
------------------------------C----------ACTTCACCA
CGCGTGG-----------------------C----------ACTTCACCA
CGCGTGG-----------------------C----------ACCTGAGCA
TGCGTGG----TATCACAGGG--TCCAGTAC---CACCGCACCACCACCC
TGCGTGG----TATCACAGGG--TCCAGTAC---CACCGCACCACCACCC
TGCGTGG----TATCACAGGG--TCCAGTAC---CACCGCACCACCACCC
TGCGTGG----TATCACAGGG--TCCAGTAC---CACCGCACCACCACCC
TGCGTGG----TATCACAGGG--TCCAGTAC---CACCGCACCACCACCC
TGCGTGG----TATCACAGGG--TCCAGTAC---CACCGCACCACCACCC
TGCGTGG----TATCACAGGG--TCCAGTAC---CACCGCACCACCACCC
CAAAGGG----CACCTTAGGG--ACCAGCG---------------CGCCC
--------------------------------------------------
TGCGGGG----CACCTCAGGG--ACCAGTG---------------CACCC
TGCGTGG----CACCGCAGGG--ACCAGTG---------------CACCC
--------------------------------------------------
TGCGTGG----TACCACAGGG--CAGAGTAT----------TAACCTCCC
C--GTGG----TATCTCAGGG--TCCAGTA---------------CCCCC
C--GTGT----TATCTCAGGG--TCCAGTA---------------CCCCC
C--ATGG----TGTATCAGGG--CCAAGTT---------------CACCC
--------------------------------------------------
CGCGTGG----CACCTCAGAG--TCCAGTG---------------C-CC-
CGCGTGG----CATCGCAGGG--CCCAGCG---------------CACCC
CGCGTGG----CATCGCAGGG--CCCAGCG---------------CACCC
CGCGTGG----CATCGCAGGG--CCCAGCG---------------CACCC
--------------------------------------------------
--------------------------AGCG--------------------
CGCGGGG----CATATCTGGG--TCCAGCG---------------C-CCC
CGCGCGG----CACCACGGGG--TCCAGCAC------------CCCTCCC
CGCGCGG----CACCACGGGG--TCCAGCAC------------CCCTCCC
CGCGCGG----CACCACGGGG--TCCAGCAC------------CCCTCCC
G--GTGG----CATAACAGGG--CCCAGCAC--------------CAGCC
TGTGTGG----CATAACAGGG--CCCAGCAC--------------CAGCC
TGTGTGG----CATGACAGGG--CCCAGCAC--------------CAGCC
TGCGTTG----AAC--CAGCC--GGCCGAGG---------------TCCC
TGCGTGG----CAC--CGGTG--CCCAGTGC--------------CTT--
TGCGTGG----CAT--CAGTG--CCCAGTAC--------------CTC--
CGCGTGG----CATCTCCGGA--CC-AGTGC--------------CTCC-
CGCGTGG----CATCCCACGG--TCCAGTAG--------CCCCCCCTCCC
TGTGTGG----CATCTCAGAG--TCCAGTA----------------ACCC
TGTGTGG----CATCTCAGAG--TCCAGTA----------------ACCC
TGCGTCG----TATC-GATAA--TTTAGGA-------------CCCACCC
TGCGTCG----TATC-GATAA--TTTAGGA-------------CCCACCC
CGCGTGG----CATCCCACGG--TCCAGTAG--------CCCCCCCTCCC
TACGTGG----TATCATCAGGG-TCTCGTA---------------CA---
C--GTGG----TTT--CCGCG--TTCGCTG---------------AACCC
TGCGTGG----CGT--CAGGT--CCCAGTG---------------CTCCC
--------------------------------------------------
C--ACGG----TAT--AAGGA--TCCAGTA---------------C-CCC
CGCGTGG----TATCGCGTGA--ACCGGCAG--------------C-CCC
CGCGTGG----CATCACAGGG--CCCAGCAG--------------CCCCC
CGCGTGG----CATCACAGGG--CCCAGCAG--------------CCCCC
CGCGTGG----CATCACAGGG--CCCAGCAG--------------CCCCC
CGCGTGG----CATCGCAGGG--CCCAGCAG--------------CCCCC
CGCGTGG----CATCACAGGG--CCCAGCAG--------------CCCCC
C--GTCG----TATCGCACGC--TCCAGCGC---------------GCCC
TGCGTCG----CTTCGCAGGG--TGCCGTGA--------------TGCCC
TGCGTCG----CTTCGCAGGG--TGCCGTGA--------------TGCCC
GGCATGG----CTT--CAGGG--TCCAGTG---------------CGCCT
GGCATGG----CTT--CAGGG--TCCAGTG---------------CGCCT
TGCGTGG----CGT--CAGAG--CGCAGTG---------------CGCCT
GGCGCGG----CTT--CAGCG--TCCAGTTGTG-----------------
CCCTTGG----GGC-CCAGCG--C--ACCTG--------------CTCCC
CGTGTAG----CATCTCAAGG--T-TAGTGC---------------ACCC
CGCGTGG----TATCGCAGGC--TCCAGTGG--------------C-CCC
CGCGTGG----TATCGCAGGC--TCCAGTGG--------------C-CCC
CGCGTGG----TATCGCGTGA--ACCGGCAG--------------C-CCC
CGCGTGG----TATCGCGTGA--ACCGGCAG--------------C-CCC
T--GCGG----CATC--AGGG--ACCAGTG---------------C-CC-
T--GCGG----CATC--AGGG--ACCAGTG---------------C-CC-
TGCGTGG----TGTCTCAGGG--CCCAGTG---------------C-CCC
TGCGTGG----TGTCTCAGGG--CCCAGTG---------------C-CCC
TGCGTGG----TGTCTCAGGG--CCCAGTG---------------C-CCC
CGCGTGG----TGTCCCAGGG--CCCAGTG---------------C-CCC
TGCGTGG----TGTCTCAGGG--CCCAGTG---------------C-CCC
C--TTCG----TAT--CAGAG--CCCACTG---------------C-CCC
TGCGTGG----TGTCTCAGGG--CCCACTG---------------C-CCC
CGCGTGG----CATCACAGGG--CCCATCAG--------------C-CCC
C--GTGG----TGTCTCAGGG--TCCAGTG---------------C-CCC
CGCGCGGC---TTTCTCAGTG--TCCGGTGA-----------CTTCACCC
TGCGCGG----TGTCACAAGG--TCCAGCGC-------------CAACCA
TGCGCGG----TGTCACAAGG--TCCAGCGC-------------CAACCA
TACC-------CAT-GCACGC-ATGGA-TG---------------CACGC
CGCATGG----CATCTCAGGG--CGCAGTGC-----------CCCAACCC
CGCATGG----CATCTCAGGG--CGCAGTGC-----------CCCAACCC
CGCATGG----CATCTCAGGG--CGCAGTGC-----------CCCAACCC
CGCATGG----CATCTCAGGG--CGCAGTGC-----------CCCAACCC
TGCGTGG----CATTCTTGGG-GCTCAGCA---------------CACAC
CGCGTGG----TATTCTTGGG-GCTCAGCA---------------CACAC
TGCGCG------ATGCC---------------------------------
TGCGCG------ATGCC---------------------------------
TGCGTGG----TATCTCAAGG-GTCCCGTG---------------CACCC
TACGCAG----TATCACAGGG--TCCAGAA-----------CCCCCTCCT
TGCGTGT----GTGTTTAGAG-----------------------------
TGCGTGG----TATCGCAGGG-GT-CAGTG---------------CACCC
TGCGTGG----TATCGCAGGG-GT-CAGTG---------------CACCC
TGCGTGG----TATCGCAAGG--GCCAGTG---------------CACCC
TGCGCGG----TATCGCAGGG--GCCAGTG---------------CACCC
TGCGCGG----TATCGCAGGG--GCCAGTG---------------CACCC
CGCGTGG----TATCGCAGGG--GCCAGTG---------------CACCC
C--CTGG----CGT--CGGGG--TCTAGTA---------------CCCCC
C--GTGG----TATC-CAGGG--TTCAGCA---------------C-CC-
C--GTGG----TATC-CAGGG--TTCAGCA---------------C-CC-
TGCGTGG----TATCGCAGGG--TCCAGCAC--------------CACCA
TGCGTGG----TAGCGCAGGG--TCCAGCAC--------------CACC-
TGCGTGG----TAGCGCAGGG--TCCAGCAC--------------CACC-
TGCGTGG----TATCTCAGGG--CCCAGTGC--------------CTCC-
CGCGTCG----TATCGATATC--TTCGG-A---------------C-CC-
C--GTGG----CAT--TAGGG--TCCACTA---------------C-CCC
C--GTGG----CAT--TAGGG--CCCACTA---------------C-CCC
CGCGTCG----TATCGATATC--TTC-GGA---------------C-CC-
TGCGCGG----CTTCACCCGG-CCCAAGTAT-------------CCTCCG
GGCGTGG----TACATCATGG--TCGCGTGC-------------ACTCCC
TGCGCCG----TATCTCAGGG--CCCCGGG---------CGCCCCCACCT
TGCGCCG----TATCTCAGGG--CCCCGGG---------CGCCCCCACCT
CGCGTGG----CTTCACCCGG-CCCAAGTAT-------------CCTCCG
CGCGTGG----CTTCACCCGG-CCCAAGTAT-------------CCTCCG
CGCGTGG----CTTCACCCGG-CCCAAGTAT-------------CCTCCG
TGTGTCG----TAG--CAGCC--TCCAGCG---------------C-CC-
CGCGTAC----TATCACAGGG--GCCAGTG---------------CGCCT
TGTGGTG----GAT--CAGGG--TCCAGTG-------------CCCTCCC
C--GTGG----CATC-CAGGG--TTCAGTA---------------C-CC-
GGCGTGG----TGTT-CGGGT--TAGATGGG-------------CCACCC
TTGCGGG----TCACCCAGGG--CCCGGTG---------------CGCCC
AGAGTGG----TATCCGAGGG--CCCGGTA---------------CACCC
AGAGTGG----TATCCGAGGG--CCCGGTA---------------CACCC
C--GTGG----TGTC-CATGC--TCCAGTG---------------C-CC-
GGCGTGG----TACATCATGA--CCGCGTG---------------CACTC
GGTGTGG----CATC-CAGGG--TTCAGTA---------------C-CC-
GGTGTGG----TATC-CAGCG--CTCAGCA---------------C-CC-
GGCGTGG----TACATCATGG--TCGCGTG---------------CACTC
TGCGTCA----TGTCGCAGGG--CCCCCCT---------------CCCCT
CGAGTCG----TGTCGCAGGG--CTCCGTGC-----------ACCCACCC
CGAATCG----TGTCGCAGGG--CTCCGTGC-----------ACCCACCC
CGAGTCG----TGTCGCAGGG--CTCCGTGC-----------ACCCACCC
CGAGTCG----TCTCGCAGGG--CTCCGTGC-----------ACCCACCC
CGCATGG----CAT--CAAGT--CCCAGTG---------------C-CC-
TGCGTGG----TATCACAGGG-TTCAAGTG---------------C-CCC
C--GTGG----TAT--CTTGG--CCCAGCG---------------C-CTC
TGCGTGG----TATCACAGGG-TCCAAGTG---------------C-CCC
TGCGTGG----TATCACAGGG-TCCAAGTG---------------C-CCC
TGCGTGG----TATCACAGGG-TCCAAGTG---------------C-CCC
TGGGTGG----TGTCTCAGGG--CCCAGTAC--------------CACC-
----------------------------------------------ACCC
-----------TG-CAGAGCC--CCCATTCC--------------CTCCC
CGTGTGG----TATCATAGGG--GCTAGTAG---------------C---
T--GTGG----CGCCACAGGG--CGCAGTA---------------TGTCC
---GTGG----TGTCTCAGGG--CCCAGTAC--------------CACC-
---GTGG----TGTCTCAGGG--CCCAGTAC--------------CACC-
TGGGCGA----TATCTCAGAC--TCCGGTA---------------CTCCC
TGGGCGA----TATCTCAGAC--TCCGGTA---------------CTCCC
TGGGCGA----TATCTCAGAC--TCCGGTA---------------CTCCC
TGGGCGA----TATCTCAGAC--TCCGGTA---------------CTCCC
CGTGTGGTA--TAA-ACAGCG--TCTGGTA---------------CTCCC
AGTGTGG----TGCCACAGGG--TCCAGTG---------------CACCC
AGTGTGG----TGCCACAGGG--TCCAGTG---------------CACCC
AGTGTGG----TGCCACAGGG--TCCAGTG---------------CACCC
CTCGTGG----CATCACAGGA--TCCACTG---------------CACTG
TGCGTGG----CGCCGCAGGG--GCCAGTG---------------C-CC-
TGCGTGG----CGCCGCAGGG--GCCCGTG---------------C-CC-
TGCGTGG----CGTCGCAGGG--GCCAGTG---------------C-CC-
TGCGTGG----CGCCGCAGGG--GCCAGTG---------------C-CC-
TGCGTGG----CGCCGCAGGG--GCCAGTG---------------C-CC-
TGCGTGG----CGCCGCAGGG--GCCAGTG---------------C-CC-
-GTGTGG----TGC--TATGG--TTCTGGG---------------CGGGC
CGCATGG----CAT--CAAGT--CCCAGTG---------------C-CC-
CGCATGG----CAT--CAAGT--CCCAGTG---------------C-C--
TGCGCGG----CATTTCAGGG--GTCAGTG---------------C-CC-
A--GTCG----TGTCACAGCG--TCCAG-----------------CATCC
TGCGTGG----CGTCACACGG--TTCCGTAC--------CTCTCCCTCCC
TGCGTGG----CGTCACACGG--TCCCGTAC--------CTCTCCCTCCC
TGCGTGG----CGTCACACGG--TCCCGTAC--------CTCTCCCTCCC
TGCGTGG----CGTCTCACGG--TCCCGTAC--------CTCTCCCTCCC
TGCGTGG----TGCCGCAGGG--CCCAGTAC-------------ACACCC
TGCGTGG----TGCCGCAGGG--CCCAGTAC-------------ACACCC
TGCGTGG----TGCCGTAGGG--CCCAGCAC-------------ACACCC
TGCGTGG----TGCCGCAGGG--CCCAGTAC-------------ACACCC
TGCGTGG----TGCCGCAGGG--CCCAGTAC-------------ACACCC
TGCGTGG----TGCCGCAGGG--CCCAGTAC-------------ACACCC
TGCGTGG----TGCCGCAGGG--CCCAGTAC-------------ACACCC
TGCGTGG----TGCCGCAGGG--CCCAGTAC-------------ACACCC
TGCGTGG----TGCCGCAGGG--CCCAGCA-------------CACACCC
A--GTCG----TGTCACAGCG--TCCAGCA----------------TCCC
TGCGTGG----TATCTCAGGG--CCCAGTA---------------CACCC
TGTGTGG----TATCTCAGGG--CCCAGTA---------------CACCC
TGCGTGG----CGTCTCACGG--TCCCGTAC--------CTCTCCCTCCC
TGCGCGT----CAT--CACGCGGCCCAGCGG--------------CCCCC
C--GTGG----TACCTCAGCG--CCCAGTA---------------CACCC
C--GTGG----TACGTCAGCG--CCCAGTA---------------CGCCC
C--GTGG----TACCTCAGCG--CCCAGTA---------------CGCCC
C--GTAA----TACCTCAGCG--CCCAGTA---------------CGCCC
C--GTGG----TACCTCAGCG--CCCAGTA---------------CACCC
CC-GTTT----TAT--CGGCA--CCCAGTAT------------CCCGCCC
CT-GCTG----TAT--CGGCA--CCCAGTAT------------CCCGCCC
CGAGTTG----TACGTCAGGG--CCCAGTA---------------CACCC
C--GTGG----TACCTCAGCG--CCCAGTA---------------CACCC
C--GTGG----TACCTCAGCG--CCCAGTA---------------CGCCC
C--GTGG----TACCTCAGCG--CCCAGTA---------------CGCCC
C--GTGG----TACCTCAGCG--CCCAGTA---------------CACCC
CTCGTCG----TCT--CAAGG--GGTCGAG---------------GACCC
TGCGTGA----GGTCGCAGGC--CCCAGTG---------------CTCCC
-----------------AGTG--CCCAGTA---------------CTCCC
-----------------AGTG--CCCAGTA---------------CTCCC
--------------------------------------------------
TGCGTGG----TATC-CAGTG--CTGAATA---------------CTCCC
CGCGCGG----TATCCCAGGG-CCCGTTTG----------------G---
TGCGTGG----TATCTCAGGG--TCCAGTA----------------ATGC
GGCGTGG----TAT--GAGGA--CCCAGC---------------CCGC--
C--GTGG----CATCTCAGGG--CACAAGGG---AGGGAGGGGGCCACTC
TGCGTCG----TGTCTCTGGG--CCCAGTGC-------------CCACTC
-----------CATCCGAGTG-TCCGCGTAC--------GCCCCCCACCC
T-ACTGCAA--TGTCCGAGTG-TCCGCGTAC-------GCCCCCCCACCT
T-ACTGCAA--TATCCGAGTG-TCCGCGTA---------------CGCCC
C--GTGG----CGCCTCAGGG--TACCGCA---------------CACCC
C--GTGG----CGCCTCAGGG--TACCGCA---------------CACCC
C--GTGG----CGCCTCAGGG--TACCGCA---------------CACCC
C--GTGG----CATCTCAGGG--CACAAGGG---AGGGAGGGGGCCACTC
--------------------------------------------------
C--GTGG----CATCTCAGGA--CACAAGGG---AGGGAGGGGGCCACTC
C--GTGG----CATCTCAGGA--CACAAGGG---AGGGAGGGGGCCACTC
C--GTGG----CATCTCAGGA--CACAAGGG---AGGGAGGGGGCCACTC
CGCGTGG----CATCTCAGGG--TCCAGTG--------------CCTGCT
GC-TTGT----AATCT-ACGG--T---GTTTC-------------CACTT
G-AGTGA----CATAGCACTG--CCCACTGC-------CCCTCTCCTCCC
C--GTGG----TGTGTCACTG--CCCACTGC-------CCCTCTCCTCCC
C--GTGG----TAT--GAGGG--TCGAGTAT---------------GCTC
C--GTGG----TATCGCAGGG--CCCCGTG---------------CACCC
C--GTGG----TATCGCAGGG--CCCCGTG---------------CACCC
C--GTGG----TATCGCAGGG--CCCCGTG---------------CACCC
TGCGTCG----TGTCTCTGGG--CCCAGTG---------------C-CC-
C--GTGG----TAT--CAGGG--TCCAGTA---------------C-CC-
C--GTGG----TAT--CAGGG--TCCAGTA---------------C-CC-
C--GTGG----TAT--CAGGG--TCCAGTA---------------C-CC-
TGCGTCG----TGTCTCTGGG--CCCAGTG---------------C-CC-
TGCATGG----CATCTCAGGG--TTCAAGAG--------------CCCCC
CGCAGGG----TATCGTGGGG--TGCTGCA---------------CTCCC
TGCGTGG----CATCGCAGGG--CCCAGTA---------------CACCC
CGCGCGG----TATCGCAGGG--CCCAGTG---------------CACCT
CGCGTGGTAA-TATCACGCGG--TCCAGTC-------------CCCACCA
C--GTGG----TGCC-CAGGG--TCCAGTG---------------C-CG-
TGCGTTG----TGTC-CAGGG--TCCAGTG---------------C-CG-
C--GTTG----TGCC-CAGGG--TCCAGTG---------------C-CG-
C--GTGG----TGTC-CAGGG--TCCAGTG---------------C-CG-
C--GTGG----TGTC-CAGGG--TCCAGTG---------------C-CG-
C--GTTG----TGTC-CAGGG--TCCAGTG---------------C-CG-
TGCGCGG----CAT--CACGC-GGCCCGTTA---------------TACT
CGCGTGG----TATCCCAGCG--CCCCGTA---------------CCCTC
CGCGTGG----TATCCCAGCG--CCCCGTA---------------CCCTC
C--TTGG----CTC--CAGGA--CCCGGTG---------------CAGCC
TGCGTGG----TATCTCAACC--TCCCGTA---------------CCCTC
TGCGTGG----CATCGCAGGG--CCCAGTA---------------CACCC
TGCGTGG----CATCGCAGGG--CCCGGTA---------------CACCC
TGCGTGG----CATCGCAGGG--CCCGGTA---------------CACCC
TGCGTGG----CATCGCAGGG--CCCAGTA---------------CACCC
TGCGTGG----CATCGCAGGG--CCCAGTA---------------CACCC
TGCGCGG----TACCTCAGGG--CC-AGTG---------------CACCC
TGCGCGG----TACCTCAGGG--CC-AGTG---------------CACCC
TGTTTGG----TATCGTTGGG--TCCAGTG---------------CACCC
TGCGCGG----TACCGCAGGG--CC-AGTG---------------CACGG
TGCGTGG----TACCTCAGGG--CC-AGTG---------------CACCC
C--CCAG----CGTC-CAGGG--TCCAGTA----------------GCCC
C--CCAG----CGTC-CAGGG--TCCAGTA----------------GCCC
CGCGCGG----TATCGCAGGG--CCCAGTG---------------CACCT
TGCGCGG----TATCGCAGGG--CCGACGG---------------CT---
TGCGCGG----TATCGCAGGG--CCGACGG---------------CT---
TGCGTGG----TATCGCAGGC--TCCCGTG---------------CACCC
CGCGTGG----TATCCCAGCG--CCCCGTA---------------CCCTC
TGCGTGG----TATCGCAGGG--TCCTGTA---------------CACCT
TGCGTGG----CATCTCAGGG--TCCGGTG---------------CCTCC
TGCGTGG----CATCTCAGGG--TCCGGTG---------------CCTCC
CGCGTGG----CATCTCAGGG--TTCGGTG---------------CCTCC
TGCGTGG----TACCTCAGGG---CCAGTG---------------CACCC
TGCGTGG----TACCTCAGGG---CCAGTG---------------CACCC
C--GTGG----TAT--CAGGG--CCCAGTA---------------C-CC-
TGCGTGG----TACCTCAGGG---CCAGTG---------------CACCC
TGCGCGG----TACCGCAGGA--CCCAGTG---------------CACCC
TGCGTCG----CATCTCAGGG--TCCAGCAT-------------GCTCAC
TGCGTCG----CATCTCAGGG--TCCAGCAT-------------GCTCAC
TGCGTCG----CATCTCAGGG--TCCAGCAT-------------GCTCAC
TGCGTGA----CACCTCAGGG--CCCAGTG---------------CCCCC
TGCGTCG----CTCCTCAGGG--TCCCGCA---------------CGACC
TGCGTCG----TACCTCGGGG--TCCAGCA---------------CACGG
TGCGTCG----TACCTCGGGG--TCCAGCA---------------CACGG
TGCGTCG----TACCTCGGGG--TCCAGCA---------------CACGG
TGCGTCG----TACCTCGGGG--TCCAGCA---------------CACGG
TGCGTCG----TACCTCGGGG--TCCAGCA---------------CACGG
TGCGTCG----TACCTCGGGG--TCCAGCA---------------CACGG
TGCGTCG---TACCCTCGGGG--TCCAGCA---------------CACGG
TGCGTCG----TACCTCGGGG--TCCAGCA---------------CACGG
TGGACGG----TATCTCAGGG--TCCAGTGG--------------TGCCC
CGCGTCG----TATCTCAGGG--TCCAGTGG--------------TGCCC
TCTGTTG----TATCTCAGGG--TCCAGTGG--------------TGCCC
CGCGTGG----TATCTCAGGG--CTTTGTGG---------------CACC
CGCGTGG----CGC--CAGGG--GCCAGCG---------------C-CCC
CGCGTGG----CGC--CAGGG--GCCAGCG---------------C-CCC
A-CGCGC----TGTTTC-------CCCTTC---------------C-CC-
TGCGTCG----CATCTCAGGG--TCCCGCA---------------CGACC
TGCGTCG----CATCTCAGGG--TCCCGCA---------------CGACC
TGCGTCG----CATCTCAGGG--TCCCGCA---------------CGACC
TGCGTCG----TACCTCGAGG--TCCAGCA---------------CACGG
CGTGTGG----TATC-CATGA--CCCTGTA---------------C-CC-
CGCGTCG----TATCTCAGGG--CCTAGTG---------------CACCC
CGCGTCG----TATCTCAGGG--CCTAGTG---------------CACCC
CGCGTCG----TATCTCAGGG--CCTAGTG---------------CACCC
TGGACGG----TATCTCAGGG--TCCAGTGG---------------TGCC
CGCGTCG----TATCTCAGGG--TCCAGTGG---------------TGCC
CGCGTCG----TATCTCAGGG--TCCAGTGG---------------TGCC
CGCGTCG----TATCTCAGGG--TCCAGTGG---------------TGCC
TGCGTGG----CATCTCAGGG--CCCGGTG---------------CACCC
AGCGTGG----CATCTCAGGG--TTCCGTG---------------CCCTC
GCGTGGC----GTCCTCATGG--CCCCGAG---------------CAGCC
AGTGCTT----GGCTCCAGGG--CCCCTTG---------------CACTC
CGCGTGA----CATCTCAGGG--CCCAGTG---------------CCCCC
CGCGTGG----CATCTCAGGG--CCCAGTG---------------CCCCC
CGCGTGG----CATCTCAGGG--CCCAGTG---------------CCCCC
CGCGTGG----CATCTCAGGG--CCCAGTG---------------CCCCC
TGCGTGA----CACCTCAGGG--CCCAGTG---------------CCCCC
TGCGTGA----CACCTCAGGG--CCCAGTG---------------CCCCC
T--GCGG----AATCTCAAGG--TTCAATG---------------C-CCT
TGCGTGG----CATCTCAAGG--CGCGGTG---------------CAGCC
TGCGTGG----CATCTCAAGG--CGCGGTG---------------CACCC
TGCGTGG----CGTCTCATGG--CC-------------------------
TGCGTGG----CGTCTCATGG--CC-------------------------
TGCGTGG----CGTCTCATGG--CC-------------------------
TGCGTGG----CGTCTCATGG--CC-------------------------
TGCGTGG----CGTCTCATGG--CC-------------------------
TGCGTGG----TATCTCAGGG--TCCAGTG---------------C-CTC
TGCGTGG----TATCTCAGGG--TCCAGTG---------------C-CTC
TGCGTGG----TATCTCAGGG--TCCAGTG---------------C-CTC
C--GTGT----CATCTCAGGG--TCCAGTT---------------C-CCC
CGCGTGG----TACCTCAGGG--CCCAGTG---------------CACCC
CGCGTGG----TACCTCAGGG--CCCAGTG---------------CACCC
--------------------------------------------------
TGCGTGG----CATCTCAGGG--TCCAGCG---------------CACCC
TGCGCGG----TAT--CGTTG--TCCAG-----------------CACCC
TGCGTGG----TATTACACGG--CCCAG-----------------CACCT
T--GCGC----GGCACCACGG--CGCAGTG---------------CACTC
TGCGCGC----GGTGTCACGGGGCCCGGTG---------------C-CCC
CGCGTGG----AATCAGGAGT--CCCA-TA---------------CTCCC
TGCGTCG----TCTCACAGGG--TGTAGTG---------------CACCC
TGCGTCG----TCTCACAGGG--TGTAGTG---------------CACCC
TGCGTCG----TCTCACAGGG--TGTAGTG---------------CACCC
TGCGTGC----TATCTCAGCG--CCCACTA---------------CACCC
TGCGTGC----TATCTCAGCG--CCCACTA---------------CACCC
TGCGTGG----TATCTCAGGG--CCCAGTG---------------CACCA
C--GCGG----TATTTCAGTC--TCCAGTG---------------CCCCC
TGCGTGG----TATCCCAGGG-AT-CAGTG---------------CACCC
TGCGTGG----TATCTCAGGG-AT-CAGTG---------------CACCC
TGCGTGG----TATCCCAGGG-AT-CAGTG---------------CACCC
TGCGTGG----CATCTCCGGG--TCCAGTG---------------CACTC
CGCGTCG----TATCTCAGCG--GCTGGTA---------------CACCT
TGCGTGA----TATCGCAGGG--TCCAGCG------------CCCCTCCC
TGCGTGA----TATCACAGGG--TCCAGCG------------CCCCTCCC
TGCGTGG----TATCGCAAGG--GCCAGTG---------------CCCCT
C--GCGG----TGTTGCGGTG--TCAGTTG---------------CCCCC
CGCGTGG----TGTCTCAGGG--CTCAGTA---------------CCCCC
C--GCCG----TCT--CAAGG--TCCGTTG---------------CCCCC
TTTTTTT----TTTTTCAAGG--CTTCTCT---------------CTCGT
TGCGCGG----TACTGCAGGG--TTCAGTG---------------CACCT
TGCGCGG----TACTGCAGGG--TTCAGTG---------------CACCT
C--GTCG----CAT---AGGG-TTCCAGTA--------------------
C--GTGC----TAGCTCAGGG--CCCAGTG---------------CAGCC
TGTGCGT----CATTTCAGGG--TCCAGCA---------------CCCCC
TGTGCGG----CATTTCAGGG--TCCAGCA---------------CCCCC
TGTGCGG----CATTTCAGGG--TCCAGCA---------------CCCCC
CGCACGG----TATCTCAGGA--TCCAGCG---------------CACCT
GCGCTGT----TATCGAAGGG-CTTCAGTG---------------CCCCC
TGCGTCG----TATTTCAGTC--TCCAGTG---------------CCCCC
CGCGTGT----TATCTCAGGG--TCCGG-----------------CACCG
TGCGTGG----TATCTCAGGG--TCCAGCG---------------CACCC
CGCATGG----CATCTCAGGG--TTCAGCG---------------CACCC
CAAATGG----CATCCCAGGG--TCCAGCG---------------CACCC
TGCGCGG----TAT--CGTTG--TCCAGCA---------------C-CCC
TGCGCAT----CATCTCAGGG--CTCAGTA---------------CACCG
TGCGCAT----CATCTCAGGG--CTCAGTA---------------CACCG
TGCGCAT----CATCTCAGGG--CTCAGTA---------------CACCG
TGTGTGG----CATCCCAGGG--TCCACTG---------------CGCCG
CGCGTCG----TATCTCAGCG--GCTGGTA---------------CACCT
CGCGTCG----TATCTCAGCG--GCTGGTA---------------CACCT
TGCGTGG----CATCGCAGGG--ACCAGTG---------------CCCCT
TGCGCGG----TATCGCAAGG--GCCAGTG---------------CCCCT
TGCGTGG----TGCATCAGCG--TCCAATA---------------CACTC
TGCGTCG----CATCTCAGCG--TTTCGTA---------------C-CGC
TGCGTCG----CATCTCAGCG--TTTCGTA---------------C-CGC
TGCGTCG----CATCTCAGCG--TTTCGTA---------------C-CGC
CGCATGC----TGACTCAGAG--CCCAGCG-------------CCCTCCC
CGCATGC----TGACTCAGAG--CCCAGCG-------------CCCTCCC
CGCCTGG----CGT-CCGCAG--TCTAGCA---------CCCCTCCACCC
GGCGTGG----CATCGTGGGG--TCCACTG---------------C-CGT
TGCGTGG----TGTCGCAGGG--CCCAGTAT--------------CCCCG
TGCGTGG----TGTCGCAGGG--CCCAGTAT--------------CCCCG
TGCGTGG----TATTTCAGGG--GTCTG-----------------CACCC
TGCGTGG----TATTTCAGGG--GTCTG-----------------CACCC
TGCGTGG----TATTTCAGGG--GTCTG-----------------CACCC
TGTGTGG----TATCTGAGGG-CTTGGTGA---------------C-CCC
TGTGTGG----TATCTGAGGG-CTTGGTGA---------------C-CCC
CGCATGC----TGACTCAGAG--CCCAGCG------------CCCTCCCC
TGCAGCG----TGTCACACAG--TCCACTA---------------CACTC
TGCTCCG----TACGTCACGG--TCCAGCA---------------CACTC
TGCGTGG----CGTCGCAGGG--CCCAGTA-------------AACACCT
TGCGTGG----TATCTCCGGT--TTCACTA---------------C-CCA
TGCGTGG----TATCTCCGGT--TTCACTA---------------C-CCA
TGCGTGG----TATCTCCGGT--TTCACTA---------------C-CCA
TGCGTGG----TATCTCCGGT--TTCACTA---------------C-CCA
TGCGTGG----TGTCTCACTG--CCCAGTG---------------CACCC
TGCGTGG----TGTCTCACTG--CCCAGTG---------------CACCC
CGCGTGG----CATCTCAGGG--TCCAGTG----------CGCCTCACTC
TGCGTGG----CATCTCAGGG--TCCAGTG----------CGCCTCACTC
--------------------------------------------------
C--GGGG----TGG--CAGGG--TGCAGTG---------------CATCC
TGCGTGA----TGCTGCAGGG--CCCACGA---------------CTCT-
TGCGTGA----TGCTGCAGGG--CCCACGA---------------CTCT-
TGCGTGG----TATCACCGGG--CCCAGTAT-----------CCCCGCCC
TGCGTGG----TATCACCGGG--CCCAGTAT-----------CCCCGCCC
TGCGTGG----TGTCGCAGGG--CCCAGTAT-----------CCCCGCCC
TGCGTGG----TGTCGCAGGG--CCCAGTAT-----------CCCCGCCC
TGCGTGA----TATCACAGAT--TCCAGTG---------------C-CCC
TGCGTGA----TATCACAGAT--TCCAGTG---------------C-CCC
TGCGTAG----CATTTGACGC--TCCAGTAT----------------CCC
TGCGTGG----TGTCTCATGG--TCCAC-AC-ACACACACACACACACAC
TGAGTGA----TGTCTCAGGG--TCCCGTG---------------CACCC
TGTTCGG----CATCTTCGGG-CTTCCCTATGTAT---------------
TGCGCCA----TATCTCAGGG--TGTCCTAC--------GCCCCCCACCT
TGCGCCA----TATCTCAGGG--TGTCGTAC--------GCCCCGCACCT
TGCGCCA----TATCTCAGGG--TGTCCTAC--------GCCCCGCACCT
T--GCGG----TATC-CAGGG--TACAATAC----------------CG-
TGCATGG----CATCACACAG--CCCAGCGC-------------CCTTCC
TGCATGG----CATCACACAG--CCCAGCGC-------------CCTTCC
TGTGTGG----TGC--CAGGG--TCCCCTAC-------------CCTC--
TGCGCGG----CAT--CAAGG--CCCAGCAG--------------CACCC
TGCGCGG----CAT--CAAGG--CCCAGCAG--------------CACCC
C--GTGG----TACCCGAGG---TCCCGTA---------------CAACC
TGCATGG----CATCTCAGAG--CCCCGTA---------------CATCC
TGCGTGG----CAGCTCAGGG--CCCAGTA---------------CACAC
TGTGTAG----TATTAGAGCC--TCCAGTGT--------------CACC-
TGCGCGG----CATCCCGTGG--TCCGGCG---------------C-CCC
TGCGCGG----CATCCCGTGG--TCCGGCG---------------C-CCC
TGCGCGG----TACTGCACGG--TCCAATG---------------CACTC
TGCGCGG----TACTGCACGG--TCCAATG---------------CACTC
TGCGCGG----TACTGCACGG--TCCAATG---------------CACTC
TACGTGG----TAGCTCAGGT--TCTAGTA---------------C-CCT
TGCGTGC----TATTCCAGGG--TCC-GTT---------------AATCC
C--GTGC----TAT--CAGAT--CGTTACCG---------------AT--
TGCGTGA----TATCTCGGTG--CTCAGTA---------------CACCC
TGCGTGG----CAGCTCAGGG--CCCAGTA-------------CACACGC
TGCGTGG----CAGCTCAGGG--CCCAGTA-------------CACACGC
TGCGTGG----CAGCTCAGGG--CCCAGTA-------------CACACGC
TGCGTGG----CAGCTCAGGG--CCCAGTA-------------CACACGC
TGCGTGG----CAGCTCAGGG--CCCAGTA-------------CACACGC
TGCGTGG----CAGCTCAGGG--CCCAGTA-------------CACACGC
TGCGTGG----CGTCTCAGGG--CCCAGCG---------CACCTTCTCCC
TGCGTGG----TAC--TGCCG--CACAGCC----------CACTGCACTC
TACGCGG----CATCTCAGGG--TCCAGTA---------------AAACC
CGGGTGG----TAAC-CATGA--CCCTGTA---------------C-CT-
CGCGTGA----TAT--CAGGG--ACCAGTA---------------C-CCC
TGCGTGG----TATC-CAGTG--GCTAGTA--------------ACTTCC
TGCATGG----TATGTCAGGG--GCCAGCA---------------C-CCC
TGCATGG----CATCTCGGTG-CT-CAGTA---------------CACCC
TGCGTGA----TATCTCGGTG-CT-CAGTA---------------CACCC
TGCATGG----CATCTCGGTG-CT-CAGTA---------------CACCC
TGCATGG----CATCTCGGTG-CT-CAGTA---------------CACCC
--------------------------------------------------
TGCGTGG----CGTCTCAGGG--CCCAGCG---------CACCTTCTCCC
TGCTTGG----CGTCTCAGGG--CCCAGCG---------CACCTTCTCCC
TGCGTGG----CGTCTCAGGG--CCCAGCG---------CACCTTCTCCC
GGCGTGG----CAT--CTTGA--TTCCGTA--------------CCTCTC
GCCGTGA----TATCTCAGGT--TCCAGCA---------------CACCC
C--GTGC----TCT--TGGGG--TCGATC----------------CTC--
ACGTTGC---AATGCCCAGCA-CCCCAGTC---------------CAATG
AATGCGG----CAT--CAGGG--TCCAGTA---------------C-CCC
CGCGTGA----TAT--CAGGG--TCCAGTA---------------C-CCC
CGCGTGA----TAT--CAGGG--TCCAGTA---------------C-CCC
CGCGTGA----TAT--CAGGG--TCCAGTA---------------C-CCC
CGCGTGA----TAT--CAGGG--TCCAGCA---------------C-CCC
CGGGTGG----TAAC-CATGA--CCCTGTA---------------C-CT-
TGCGTGG----CACCACAAGC--GCCAGTG---------------CACCC
TGCGTGG----CACCACAAGC--GCCAGTG---------------CACCC
TGCGTGG----CACCACAAGC--GCCAGTG---------------CACCC
C--GTGG----TATCTCATGG--CCGAGAA--------------CCTC--
CGCGTGG----TATCTCAGGG--GCCAGTA---------------CACA-
CGCGTGG----TATCTCAGGG--GCCAGTA---------------CACA-
TGCGTGG----TATCGGAGAG--TACAGTG---------------CCCCC
TGCGTGG----TATCGGAGAG--TACAGTG---------------CCCCC
CGCGTGA----TAT--CAGGG--TCCAGTA---------------CCCCC
TGCGTGGTGG-TGTCACAGGG--CCCAGCA---------------C-CCC
TGAGTGGTGG-TGTCACAGGG--CCCAGCA---------------CCCCC
TGCGTGG----CATCT-AGGG-GCTTCGTA---------------C-CT-
C--GCGG----TATCT--TGC--TCCAGAA---------------C-CCG
TGGGTGC----GCGTAGAGTT--GTGGGCTT---------------TGCG
TGCGTCA----TGTTTCCGGG--TCCAGTG---------------CACCG
TGCGTGG--TCTCTCAGAGAC--ACGAGTG---------------CACCC
CGCGTCG----TATTTTGGGG--TCCAGTG---------------CATCC
CGTGCGG----CAC--CTACG--CCCAGGCG-------------CCTCCC
CGTGCGG----CAC--CTACG--CCCAGGTG-------------CCCCCC
CGCGTGG----CAC--CTACG--CCCAGGCG-------------CCTCCC
CGCGTGG----CAC--CTACG--CCCAGGTG-------------CCTCCC
TGCTTAA----TACCTCAGGG---CCAAGTA--------------C-CCC
G--GCGT----CGTTGCAGGG--C--AG-A---------------CAC--
GGCGTGGTGG-TGTCACAGGG--CCCAGCA---------------CATCC
GGCGTGGTGG-TGTCACAGGG--CCCAGCA---------------CATCC
GCGTGATGG--TGTCACAGGG--CCCAGCA---------------CATCC
A--GTAG-------CACAAA----CCATGA---------------GACCT
GGCGTGGTGG-TGTCACAGGG--CCCAGCA---------------CATCC
GGCGTGGTGG-TGTCACAGGG--CCCAGCA---------------CATCC
TGCGTGG----CATCACAGGG--TCCAGTGT--------------CTACT
C--GTGG----CTTTCCAGGG--TTCAGTCT-------------CCTCG-
TGCCCGG----TGTCTCAGCG--TCCCGTG---------------CACCC
TGCGGGC----TATCTCTGGG--TCCAGTG--------------CCACC-
TGCGCGG----TTTCACAATG--TGCACTA---------------C-CCA
TGCGTGA----TATCACAGGG--TCCGGTA---------------CACC-
TGGGTGG----TATCCCAGGG--TGCAGTA---------------CAGCC
TGCGTGG----TATCCCAGGG--TGCAGTA---------------CAGCC
TGCGTGG----TATCCCAGGG--TGCAGTA---------------CAGCC
GGCCTGG----TGTCTCAGCG--TCCAGTG-----------CGCCCACGC
GGCCTGG----TGTCTCAGCG--TCCAGTG-----------CGCCCACGC
GGCCTGG----TGTCTCAGCG--TCCAGTG-----------CGCCCACGC
TGTGTGC----GGTGTCAGGG--ATCAGTG---------------C-CC-
TGTGTGC----GGTGTCAGGG--ATCAGTG---------------C-CC-
TGCGTCG----TATCTCAGGG--TCCGCTA---------------CACCC
C--GTGG----TTT--CAGAA--TCCAGCA---------------CACAC
CACGTGG----GGT--CAGGG--TCCAGTG---------------CACCC
TGCGTGG----CATCTCAGCC--ACCACCAG----------------CCG
CGCGTGG----CAC--CTACG--CCCAGGTG-------------CCTCCC
T--GTGG----TATCACAGGG--TCCAGTA---------------CTCCC
TG-GTGG----TGTCACAGGG--CCCAGCA---------------CATCC
--CATGG----TATCACAGGG--TCCCGTG---------------C-CCA
TGCGTGGTGG-TGTCACAGGG--CCCAGCA------------CCCCTCCC
TGCGTGG----TATCACAGGG--CTCAGCGT--------------GTCCC
TGCGTGG----TATCACAGGG--CTCAGCGT--------------GTCCC
TGCGTGG----TATCACAGGG--CTCAGCGT--------------GTCCC
TGCGCGG----TGTCTCAGGG--TCCCGTG---------------CGCCC
TGCGCGG----TTTCGCAATG--TGCACTA---------------C-CCA
TGCGTGG----TATCCCAGGG--TGCAGTA---------------CAGCC
CACGTGG----TGCA-CAGGG--TCCATTG---------------C-CCC
TGCGCGG----CATCTCGGGG--TCCAGTG---------------CACCC
TGCGTGT----CATCTCGGGG--TGCAGTG---------------CACCC
TGCGTGT----CATCTCGGGG--TGCAGTG---------------CACCC
TGCGCGG----CATCTCGGGG--TCCAGTG---------------CACCC
TGCGCGG----CATCTCGGGG--TCCAGTG---------------CACCC
TGCGTGC----TCTCTCTCGT--TGTTCAG---------------CACTC
T--ATTG----CAT--CAGGG--TCCACGTG------------GGCTC--
T--ATTG----CAT--CAGGG--TCCACGTG------------GGCTC--
TGCGTGG----CATCTCAGCC--ACCAGCAGCCGT---------------
TGCGTGG----CATCTCAGCC--ACCACCAGCCGT---------------
--------------------------------------------------
CGCATAG----TATC-CAGGC--TCCAGTG---------------C-CCC
C--GTTC----TTTCTACCAG--TTCCGCCC-----------CTCCACTC
C--GTGG----CATCACAGGG--TCGAGCG---------------C-C--
CGCGTGG----TACCTCAGAG--TCCAGCA----------------ACCC
CGCGTGG----TACCTCAGAG--TCCAGCA----------------ACCC
CGCGTGG----CGCCTCAGAG--TCCAGCA----------------ACCC
TCC-TCT----GATGACAGGG---GCGCCA----CACCAGTGTGGCATCT
TGCGTGT----CATCTCAGAG--TGCAGTA---------------CAT--
CGA-CCT----CATCTCATCG--TCGCACC------------CCTTGCCC
C--GTGG----CTTCTCCGGG--TCCAGCG---------------CTCC-
TGCGTGG----TGTGACAGAG--CTCGGTG---------------C-CCC
GAAGTGC----TTCGTGACGG-----AGCA-------------CACACCT
--CATTG----CACCTCAGCG--TGCACCA---------------C-CCC
TGCGTGG----AGTCTCAAGG--GCCAATA---------------C-CCC
TACGTGG----CATCACAGGC--TTCCGCA---------------CCCTC
C--GTTG----CACCTCAGGG--TCGAGTA---------------CATCG
C--GTTG----TACCTCAGGG--TCCAGTA---------------CATCG
C--GTTG----CACCTCAGGG--TCGAGTA---------------CATCG
C--GTTG----CACCTCAGGG--TCGAGTA---------------CATCG
C--GTTG----CACCTCAGGG--TCGAGTA---------------CATCG
CGCGTGG----CAT-CCAGCG--CCCAGTG---------------CACGC
CGCGCGG----TTCAACAGGG--TTTGGGA---------------CCCCA
C--GTGG----CATCACAGGG--TCCGGCG---------------C-CCC
TGCGTGG----TGTGACAGAG-CT-CAGTG---------------CCCCA
TGCGTGA----TATCTCAGGG--TCCACAA---------------CACCA
C--GTGT----CAT--GAGGG-CT-CCATA----------------ACTA
TGCGTGG----TGT--TACGG--CCCAGTA----------------ATCC
TGCGTAG----TGT--TACGG--CCCAGTA----------------ATCC
C--GTCG----TATTTCAGGG--CCCGGCA---------------C-CC-
C--GTGG----CATCACAGGG--TCCAGCG---------------C-CCT
C--GTAA----CATCACAGAG--TCCAGCG---------------C-CCT
C--GTTG----TAT--CAGGC--ACCAGCA---------------CAACC
T--ATGG----CATCTGAGGG--TCCAGCA---------------CAACC
AG-TGCG----TGGTGCA--T--CTCTGCAT--------CCAGCACACCC
C--GTTG----CACCTCAGGG--TCGAGTA---------------CATCG
TGCGTGG----TGTCGCGGGG--TCCAGTG---------------C-CCG
TGCGTGG----TGTCGCGGGG--TCCAGTG---------------C-CCG
C--GTAG----TAT--CAGGG---ATAGTT---------------C-CA-
CGTGTGG----TGCCGCAGGG--CTCAGTG--------CAACCCCCACCC
G--GAGA----TATTTCAGGG-----CGTG--ACATCTCGATGGCCACTA
CGCGTCG----CTC---ACGG--CCCAGTG-------CCCCCACCTACCC
CGTGTGG----CATCTCAGGG--TCCAGTG---------------CACCC
CGTGTGG----CATCTCAGGG--TCCAGTG---------------CACCC
CGTGTGG----CATCTCAGGG--TCCAGTG---------------CACCC
TGCGTGG----TGCC-CAGGG--CCCAGTG---------------C-CCA
TGCCGTT----CATC-GTCCG--T-CAGTGT-------------CCGC--
TGCGCGG----CATCT-ACGC--T-ACGTGT-------------TCAC--
T--GTGT----TAT--CAGGG-TCCGAGTCC------------CCTTCCC
T--GTGT----TAT--CAGGG-TCCGAGTCC------------CCTTCCC
T--GTGT----TAT--CAGGG-TCCGAGTCC------------CCTTCCC
T--GTGT----TAT--CAGGG-TCCGAGTCC------------CCTTCCC
---GCAG----CAT--CAGGG--GGCAGTA---------------C-CC-
TGTGTGG----TATCTCAGGGGGGCCAGCG---------------CCCCC
C--GTGG----CATCACAGGG--TCCGGCG---------------C-CCC
TGCGTGG----TGTGACAGAG-CT-CGGTG---------------C-CCC
TGCGTGG----TGTGAGAGAG-CT-CGGTG---------------C-CCC
TGCGTGG----TGTGACAGAG-CT-CGGTG---------------C-CCC
T--GAGA----TATT-CCGGA--TCCAGTG---------------C-CCC
TGCCTGG----TATCACAGCG--TCCAGTG---------------CACC-
TGCTCGG----TATCACAGGG--CCCTGTA---------------CACCT
TGCTCGG----TATCACAGGG--CCCTGTA---------------CACCT
TGCTCGG----TATCACAGGG--CCCTGTA---------------CACCT
T--GTGT----TATC-CAGAT--CCCGTTA---------------C-CT-
CGTGGCA----TCTCTCAGAG--TCCAGTG---------------CACCA
TC-GTGG----CA---CACGA--CCCAGC----------------CGCCC
TC-GTGG----CA---CACGA--CCCAGC----------------CGCCC
TC-GTGG----TA---CACGA--CCCAGC----------------CGCCC
TC-GTGG----CA---CACGA--CCCAGC----------------CGCCC
TC-GTGG----CA---CACGA--CCCAGC----------------CGCCC
AGCGTGG----TGT--CAGGG--TCTAGTAT--------------C-C--
CGTGCGT----GGTGTCAGGA-CTCCAGTG---------------CTTCC
CGTGTGA----TATCTCAGGA--TCCAGTG---------------C-CCT
C--GTTA----CAACGTAAGA-GTC--------------------CACCC
TGCGTGT----TTTCACAG----TCCAGAG---------------CCTCG
TGCGTGG----CGT--CAGGG--CCCTGCA---------------CATTC
TGCGCGG----CATCTCAGGG--TCCAGTG---------------C-CTC
TGCGCGG----CATCTCAGGG--ACCAGTG---------------C-CTC
TGCGCGG----CATCTCAGGG--ACCAGTG---------------C-CTC
C--GTGG----TATT-GAGGG-CTCAAGAA---------------CACCA
G--AGGG----CGT--CAGGG--CCCTGCA---------------CATTC
TGCGTGG----TATCCCAGAT--CTCAGTGT-------------CCTT--
CGCGTGA----CATCTCAGGA--TCCAGTA--------------CCA---
CGCGTGA----CATCTCAGGA--TCCAGTA--------------CCA---
TGCGTGG----TATCTCGGGG--TCCAGTG---------------CTTC-
TGCGTGG----TATCTCGGGG--TCCAGTG---------------CTTC-
TGCGTGG----CCGGTCAGGG--CCCAGTAG--------------C-CCT
TGCGCGG----CGTCGGAGGG--ACCAGTGC------------CCCACGC
TGCGTGG----CGTCGGAGGG--ACCAGTGC------------CCCACGC
TGCGCGG----CGTCGGAGGG--ACCAGTGC------------CCCACGC
TGCGCGG----CGTCGGAGGG--ACCAGTGC------------CCCACGC
TGCGTGG----CATCGGAGGG--ACCAGTGC------------CCCACGC
TGCGCGG----CGTCGGAGGG--ACCAGTGC------------CCCACGC
TGCGTGG----TAT--CAGGAC-TCCAGTG---------------CTTCC
GCCATGG----TAT--CAGAG--TTCCGTA---------------C-CCC
CGCGTGG----TATCGCACAG--CTCGGCAC-------------CCACCC
C--ATAG----TATT-C-GAG--ACCAGTG---------------C-CCT
CGTGTGG----TATATCAGGG--TTCAGTG---------------CTCCC
TGCGCGG----CGTCTCAGGA--TCCAGTG---------------C-CCT
TGCGCGG----CGTCTCAGGA--TCCAGTG---------------C-CCT
C--GGGG----TAT--CAGGG--TTCAGCG---------------CACCA
C--GTGG----TGA--CCGGG--TCACGTG---------------C-GTA
T--GTCT----TAT--CAGGT--TC-ATT----------------C----
T--GTGG----TATCTCAGGG--TGCAAGAG--------------CCCCC
C--GTCG----TAT--CAGGG--TTTAGTA---------------C-CCC
CGCGTAG----TAGCGCATAG--TCCAGCAA--------------CCCCC
T--GTGG----TATC-AAGGG--TAGAGAA----------------ACCT
C--GCTG----TAT--CAGTG--TCCAGAA---------------C-CC-
TGCGCAA----CATCACAATG--TCCAGTAT--------------CCCCC
TGCGGTG----TCT--TGGCG--TTCACCAC------------CTCAACT
TGCGCGG----CATCTCAGGG--TCCAGTGC------------CTCATCT
TGCGCGG----CATCTCAGGG--ACCAGTGC------------CTCATCT
C--GTGA----AAC--CGGTG--TCCGGTG---------------CACCC
TGCGTCG----TATGCGAAGA--CCCAGCG---------------CACCC
CGTGTGA----TATCTCAGGA--TCCAGTG---------------C-CCT
CGTGTGA----TATCTCAGGA--TCCAGTG---------------C-CCT
TGTGTGT----TATCACAGGG--TTCCGTGTATTTT---------C----
C--ACGG----TATCTCAGGG--TCCAGCG---------------C-CCC
C--ACGG----TATCTCAGGG--TCCAGCG---------------C-CCC
TGCGTGG----TATCTCAGGG--TCCAGCG---------------C-CCC
TGCGTGG----TAGCACAGCC--CTGAGTCT--------------CAG--
TGCGTGG----TAGCACAGCC--CCGAGTCT--------------CAG--
C--GGGG----TGTCTCAGGG--TCTAGTA---------------CGCCC
TGGGTGATGG-CATCACACCG-CTCCATAC---------------CTCCC
TGCGTGGTGG--CTCACACGT-CTCCATAC---CTCCCCCCCCCCCATCC
TGCGTGG----TGT-CCAGTG--TCCAATG---------------CAG--
TGCGTGG----TGT-CCAGTG--TCCAATG---------------CAG--
GCGGTGG----TTTCTCAGGC--AGCCGGG---------------CCCCC
---------------------------------------------CCCCC

C-------------------------------ACA---------------
--------------------------------AC----------------
C-------------------------------ACTTGCT-----------
C-------------------------------ACTCTAT-----------
GG------------------------------AT----------------
--------------------------------TGTGT-------------
--------------------------------TCTCT-------------
CCCCACC-------------------------ACACACACACACACACAC
CTCCCCCCCCCGC-------------------ACACACACACACACACAC
ACGCCCA-------------------------ACTCT-------------
CC------------------------------ACTCT-------------
CCTCTCCCC-----------------------ACTCG-------------
CCCCCCCCCCCCCCCCCC--------------ACTCC-------------
CT------------------------------GCGCG-------------
--------------------------------ACGCT-------------
CGC-----------------------------ACTCGTT-----------
C-------------------------------TCTCGCTCTCTCTCTCTC
CTCCACCCCC----------------------GCTCTCTCTCTCTCTCTC
CTCCACCCCC----------------------GCTCTCTCTCTCTCTCT-
CTCCACCCCC----------------------GCTCTCTCTCTCTCTCTC
CTCCACCCCC----------------------GCTCTCTCTCTCTCTCTC
C-------------------------------ACCCCATCC---------
C-------------------------------ACCCCATCCCAC------
C-------------------------------ACCCCATCC---------
C-------------------------------ACCCCC------------
CCCCCCCCC-----------------------ACTCCAT-----------
C-------------------------------ACTCTCT-----------
--------------------------------------------------
C-------------------------------TCTCTCT-----------
C-------------------------------TCTCTCT-----------
ACCCGCCC------------------------ACACTCTTTTTCT-----
C-------------------------------TCAGT-------------
C-------------------------------ACTCTCT-----------
--------------------------------GTTCTT------------
--------------------------------GCTCT-------------
--------------------------------GCTCT-------------
GCGCCTCCCTCCCTC-----------------ACTCT-------------
CC------------------------------ACTCTCC-----------
CC------------------------------ACTCTCC-----------
CC------------------------------ACTCTCC-----------
CC------------------------------ACTCTCC-----------
CA------------------------------------------------
--------------------------------ACTCT-------------
--------------------------------ACTCT-------------
--------------------------------ACGT--------------
CCCA----------------------------ACTCTCT-----------
CCTA----------------------------ACTCTCT-----------
--------------------------------------------------
CT------------------------------------------------
CT------------------------------------------------
C-------------------------------TCTCT-------------
C-------------------------------TCTCT-------------
C-------------------------------TCTCT-------------
CCA-----------------------------ACTCTCT-----------
CCCC----------------------------------------------
CCACC---------------------------A-TCTTTCGCCTT-----
CCCA----------------------------ACTCTCT-----------
--------------------------------GCTCT-------------
--------------------------------GCTCT-------------
C-------------------------------ACTCTCTCT---------
AC------------------------------ACACAC------------
--------------------------------ACGATGC-----------
TTG-----------------------------ACATCTTCTTGTGTGTAT
--------------------------------ACGATGC-----------
C-------------------------------------------------
A-------------------------------------------------
C-------------------------------ACTCTCTCT---------
C-------------------------------ACTCTCTCT---------
C-------------------------------ACTCTCTCT---------
--------------------------------ACGATGC-----------
--------------------------------ATTCT-------------
--------------------------------ACGGT-------------
--------------------------------AGTCTA------------
C-------------------------------ACTCG-------------
CT------------------------------------------------
CCCCCCCCCA----------------------ACTCT-------------
C-------------------------------ACTCCCT-----------
C-------------------------------ACTCCCT-----------
C-------------------------------ACCGT-------------
C-------------------------------ACTCCCT-----------
C-------------------------------ACCGT-------------
C-------------------------------ACTCCCT-----------
TCTCCCAC------------------------------------------
C-------------------------------ACTCG-------------
C-------------------------------ACTCG-------------
C-------------------------------ACTCG-------------
C-------------------------------ACTCG-------------
C-------------------------------ACTCG-------------
C-------------------------------ACTCG-------------
C-------------------------------ACTGT-------------
C-------------------------------ACTCG-------------
CC------------------------------ATTCGCT-----------
CC------------------------------ATTCGCT-----------
--------------------------------ACTGT-------------
C-------------------------------GCTCT-------------
C-------------------------------GCTCT-------------
TC------------------------------TCTCTCTCTCT-------
C-------------------------------ACCCCTCTCTCTCT----
--------------------------------ACTCCCT-----------
--------------------------------ACTCCCT-----------
--------------------------------ACTCCCT-----------
--------------------------------ACTCCCT-----------
--------------------------------ACGCTCT-----------
--------------------------------ACGCTCT-----------
--------------------------------ACGTT-------------
CTCCCCCT------------------------ACCC--------------
CTCCCCCT------------------------ACCC--------------
CC------------------------------ACCCTCT-----------
C-------------------------------TCTCTCTCTCTCCCTCT-
--------------------------------TGTGCGTGTGTGCCTGCG
TA------------------------------TTACAT------------
CCTCCCCC------------------------AATCTCTCT---------
CCTCCCCC------------------------AATCTCTCT---------
CCTCCCCC------------------------AATCTCTCT---------
CCTCCCCC------------------------AATCTCTCT---------
CTTCCCCCCCCCCACACACACACACCTCACC-ACTCGCTCTCT-------
CACC----------------------------ACTCGCTCTCT-------
AACCTCACC-----------------------ACTCGCTCTCT-------
CCTC----------------------------------------------
--------------------------------ACACCAC-----------
C-------------------------------TCTCTCTCTCTCCCTCT-
--------------------------------AGTCT-------------
GC------------------------------TCTCTGT-----------
C-------------------------------ACTCT-------------
C-------------------------------ACTCT-------------
C-------------------------------ACTCT-------------
C-------------------------------ACTCT-------------
TCG-----------------------------CCTCAT------------
--------------------------------ACTCT-------------
C-------------------------------ACTCT-------------
C-------------------------------ACTCT-------------
C-------------------------------ACTCT-------------
C-------------------------------ATTCG-------------
C-------------------------------ACTCT-------------
GC------------------------------TCTCT-------------
G-------------------------------ACTCT-------------
C-------------------------------ACTCT-------------
C-------------------------------ACTTT-------------
G-------------------------------ACTCT-------------
G-------------------------------ACTCT-------------
G-------------------------------ACTCT-------------
C-------------------------------ACTCT-------------
C-------------------------------ACTCT-------------
C-------------------------------ACTCT-------------
C-------------------------------ACTCT-------------
C-------------------------------ACTCT-------------
--------------------------------------------------
CC------------------------------GCTCTCT-----------
CC------------------------------GCTCTCT-----------
AC------------------------------ACTCT-------------
CT------------------------------TCTCT-------------
CT------------------------------TCTCT-------------
CT------------------------------TCTCT-------------
CT------------------------------TCTCT-------------
CT------------------------------TCTCT-------------
CC------------------------------TCT---------------
CC------------------------------TCT---------------
C-------------------------------------------------
C-------------------------------------------------
C-------------------------------------------------
C-------------------------------------------------
C-------------------------------------------------
--------------------------------TCTCTGT-----------
-------------------------------GGCTTT-------------
ACACACAC------------------------ACTGC-------------
ACACACAC------------------------ACTGC-------------
C-------------------------------ACTCG-------------
C-------------------------------ACTCG-------------
AC------------------------------ACTCTCTCT---------
AC------------------------------ACTCTCTCT---------
--------------------------------ACTCT-------------
--------------------------------ACTCTGTC----------
--------------------------------ACTCGCTCT---------
--------------------------------TCTGT-------------
--------------------------------TCTGT-------------
--------------------------------TCTGT-------------
--------------------------------TCTGT-------------
--------------------------------TCTGT-------------
--------------------------------TCTGT-------------
--------------------------------TCTGT-------------
--------------------------------ACTCC-------------
CTCC----------------------------------------------
CCCC----------------------------ACTCTCTC----------
CCCC----------------------------ACTCTC------------
CCCC----------------------------ACTCTCTC----------
C-------------------------------ACTATTT-----------
CCC-----------------------------ACTCTCTCTCTCTCT---
CCC-----------------------------ACTCTCTCTCTCT-----
C-------------------------------ACTC--------------
CTCCAG--------------------------------------------
CCC-----------------------------ACTCTCTCTCT-------
--------------------------------ACTCT-------------
CCC-----------------------------ACTCTCTCTCT-------
C-------------------------------ACTCT-------------
C-------------------------------ACTCT-------------
TTTTCTTC------------------------AG----------------
--------------------------------ACGCT-------------
CCATCGCCACCC--------------------ACTCGTT-----------
CCATCGCCACCC--------------------ACTCGTT-----------
CCATCGCCACCC--------------------ACTCGTT-----------
CCATCGCCACCC--------------------ACTCGTT-----------
--------------------------------ACGCT-------------
--------------------------------ACTCT-------------
--------------------------------ACTCT-------------
--------------------------------------------------
--------------------------------------------------
C-------------------------------ACTCTCTCTCCC------
C-------------------------------ACTCTCTCTCTCTCTCT-
C-------------------------------ACTCTCTCTCCCT-----
C-------------------------------ACTCTCTCTCTCT-----
C-------------------------------ACTCTCTCTCT-------
C-------------------------------ACTCTCTCTCT-------
C-------------------------------ACTCTCTCTCTT------
--------------------------------TCTCG-------------
--------------------------------ACGCT-------------
--------------------------------ACGCT-------------
--------------------------------ACTCT-------------
--------------------------------ACTCT-------------
CCG-----------------------------------------------
CCG-----------------------------------------------
CCA-----------------------------------------------
CCG-----------------------------------------------
CCA-----------------------------------------------
CCTCCACACACACACACGCACACAC-------ACTCT-------------
CGTCCACACACACACACGCACACAC-------ACTCT-------------
-----ACACACGCACACGCA------------CCTCTCC-----------
TCCACAGAGACACACGCACACAC---------ACTCT-------------
AA------------------------------ACTCT-------------
AA------------------------------ACTCT-------------
CCTCCCTTCCCC--------------------AATCTCTCTACCT-----
CCTCCCTTCCCC--------------------AATCTCTCTACCT-----
--------------------------------GCTCT-------------
GC------------------------------ACACAGGCC---------
--------------------------------------------------
C-------------------------------------------------
C-------------------------------GCTCC-------------
C-------------------------------GCTCC-------------
CTCA----------------------------ACTCT-------------
CTCA----------------------------ACTCT-------------
CAAGGGAAAAAACCTGC---------------ACTCTCT-----------
TCC-----------------------------------------------
TCC-----------------------------------------------
--------------------------------GCTCT-------------
--------------------------------------------------
CACTC---------------------------ACTCTCTCTTTCTCTCCT
CACTC---------------------------ACTCTCTCTTTCTCTCCT
CCCTC---------------------------ACTCTCTCTTTCTCTCCT
CACTC---------------------------ACTCTCTCTTTCTCTCCT
CCCCC---------------------------TCTCTCTCTCTTTCTCTC
CTCC----------------------------------------------
CTCC----------------------------------------------
CTCC----------------------------------------------
CTCC----------------------------------------------
CTCC----------------------------------------------
CT------------------------------GCGCTCTCT---------
C-------------------------------ACTCACTCTCTCTTTCTC
CC------------------------------ACTG--------------
CC------------------------------ACTG--------------
CC------------------------------ACTGT-------------
CC------------------------------ACTGT-------------
CC------------------------------ACTGT-------------
CC------------------------------ACTGT-------------
CC------------------------------ACTGT-------------
CC------------------------------ACTGT-------------
CC------------------------------ACTGT-------------
C-------------------------------GCTCT-------------
C-------------------------------ACTCACTCTCTCTTTCTC
--------------------------------GCCAT-------------
C-------------------------------ACCAT-------------
C-------------------------------ACCAT-------------
CGCAC---------------------------CCTCT-------------
GC------------------------------ACTTT-------------
CGCAC---------------------------CCCCT-------------
CGC-----------------------------ACCCTCT-----------
CGC-----------------------------ACCCTCT-----------
CGC-----------------------------ACCCTCT-----------
CGC-----------------------------ACCCTCT-----------
CGC-----------------------------ACCCTCT-----------
T-------------------------------ACTCC-------------
C-------------------------------TCTGCCAT----------
C-------------------------------TCTGT-------------
C-------------------------------TCTGT-------------
CGCCC---------------------------AGAGTGGGTCGAG-----
CGCCC---------------------------AGAGTGGGTCGAG-----
CGCCC---------------------------AGAGTGGGTCGAG-----
C-------------------------------ACCCTCT-----------
--------------------------------ACTCT-------------
--------------------------------ACTCT-------------
--------------------------------ACTGT-------------
--------------------------------ACCGT-------------
--------------------------------ACTGT-------------
--------------------------------ACCGT-------------
CTCGCA--------------------------ACTCTCT-----------
GTCGCA--------------------------ACTCTCT-----------
CTCGCA--------------------------ACTCTCT-----------
CTCGCA--------------------------ACTCTCT-----------
CCACC---------------------------ATCTTTC-----------
CTCCCACA------------------------ACTCTCT-----------
C-------------------------------CCTCC-------------
C-------------------------------ACTCT-------------
C-------------------------------ACTCT-------------
C-------------------------------ACTCT-------------
C-------------------------------ACTCT-------------
--------------------------------GCTCT-------------
--------------------------------GCTCT-------------
ACGCAC--------------------------ACTCACACACACA-----
ACGCAC--------------------------ACTCACACACACACC---
ACGCAC--------------------------ACTCACACACACA-----
ACGCAC--------------------------ACTCACACACACACC---
GCAC----------------------------ACTAACACACACACC---
--------------------------------ACTATTCC----------
--------------------------------ACTATTCC----------
--------------------------------ACTATTCCAC--------
--------------------------------ACTATTCCAC--------
--------------------------------ACTATTCC----------
--------------------------------ACTATTCC----------
GC------------------------------TCTCT-------------
GC------------------------------TCTCT-------------
GC------------------------------TCTCT-------------
GC------------------------------TCTCT-------------
AC------------------------------TCTCT-------------
CAT-----------------------------------------------
--------------------------------ACTCT-------------
TTT-----------------------------------------------
--------------------------------ACTCTCTGCAT-------
TC------------------------------AGTCT-------------
TC------------------------------AGTCT-------------
--------------------------------ATAGTGTCC---------
--------------------------------AGTGTCC-----------
--------------------------------ATAGTGTCC---------
--------------------------------ACTGG-------------
--------------------------------ACTGG-------------
--------------------------------ACTGG-------------
TC------------------------------AGTCT-------------
--------------------------------ACTGG-------------
--------------------------------ACTGG-------------
--------------------------------TCTGC-------------
--------------------------------GCTCT-------------
C-------------------------------ACTCT-------------
CTC-----------------------------------------------
CCC-----------------------------ACTCTCTCT---------
CCC-----------------------------ACTCTCTCT---------
CCC-----------------------------ACTCTCTCT---------
CCC-----------------------------ACTCTCT-----------
CCTCCCTTCCCCCACTCCCG------------ACTCCCTGC---------
CCTCCCTTCCCCCACTCCCG------------ACTCCCTGC---------
CCTCCCTTCCCCCACTCCCG------------ACTCCCTGC---------
CCTCCCTTCCCCCACTCCCG------------ACTCCCTGC---------
CCTCCCTTCCCCCACTCCCG------------ACTCCCTGC---------
CCTCCCTTCCCCCACTCCCG------------ACTCCCTGC---------
CCTCCCTTCCCCCACTCCCG------------ACTCCCTGC---------
--------------------------------ACTCTCTCCTA-------
--------------------------------------------------
--------------------------------ACTCTCTCTCC-------
--------------------------------ACTCTCTCTCC-------
--------------------------------ACTCTCT-----------
--------------------------------ATTCT-------------
--------------------------------ACTCT-------------
--------------------------------ACTCT-------------
--------------------------------CGTCG-------------
--------------------------------------------------
--------------------------------TCTCC-------------
--------------------------------TCT---------------
--------------------------------TCT---------------
--------------------------------TCT---------------
--------------------------------GCTCT-------------
--------------------------------ACACATT-----------
--------------------------------ACTCT-------------
--------------------------------ACTCT-------------
--------------------------------ACTCT-------------
--------------------------------ACTCT-------------
CC------------------------------------------------
CC------------------------------------------------
CC------------------------------------------------
C-------------------------------ACCGT-------------
--------------------------------AGTCT-------------
--------------------------------ACTCTCT-----------
--------------------------------AGTTC-------------
CCCCCCCACACACATACACAC-----------ACTTTCTCT---------
C-------------------------------ACTCT-------------
C-------------------------------ACTCT-------------
T-------------------------------------------------
T-------------------------------------------------
CCCCCCCCCCACACACATACACAC--------ACTTTCTCT---------
--------------------------------------------------
CTGC----------------------------ACTCTCT-----------
--------------------------------ATTCTC------------
--------------------------------------------------
C-------------------------------ACTCTAC-----------
GT------------------------------ACTCTCTCT---------
C-------------------------------------------------
C-------------------------------------------------
C-------------------------------------------------
C-------------------------------------------------
C-------------------------------------------------
--------------------------------ACTTT-------------
CCGCC---------------------------------------------
CCGCC---------------------------------------------
--------------------------------CCTCTC------------
--------------------------------CCTCTC------------
--------------------------------GCTCCC------------
--------------------------------AGTGT-------------
--------------------------------------------------
C-------------------------------ACGCTCT-----------
C-------------------------------ATTCC-------------
C-------------------------------ATTCC-------------
GT------------------------------ACTCT-------------
GT------------------------------ACTCTCTCT---------
--------------------------------ACTCT-------------
--------------------------------ACTCT-------------
C-------------------------------ACTCT-------------
C-------------------------------ACTCT-------------
C-------------------------------ACTCT-------------
C-------------------------------ACTCT-------------
C-------------------------------ACTCT-------------
C-------------------------------ACTCT-------------
C-------------------------------ACTCTG------------
CC------------------------------------------------
C-------------------------------ACTCT-------------
AC------------------------------AGTGTCC-----------
C-------------------------------ACTCTCTCT---------
C-------------------------------ACTCTCTCT---------
GCGCGCACACACACACGC--------------ACTTATCAGC--------
CCCTCC--------------------------GCTCT-------------
CCCTCC--------------------------GCTCT-------------
CCCTCC--------------------------GCTCT-------------
CCCTCC--------------------------GCTCT-------------
C-------------------------------ACTCTCT-----------
C-------------------------------ACTCTCT-----------
--------------------------------------------------
--------------------------------------------------
CCCCCTCCA-----------------------ACTCC-------------
CCCGC---------------------------ACAGAGA-----------
--------------------------------------------------
--------------------------------ACTCT-------------
--------------------------------ACTCT-------------
--------------------------------ACTCT-------------
--------------------------------ACTCT-------------
--------------------------------ACTCT-------------
--------------------------------ACTCT-------------
CCAC----------------------------ACACT-------------
--------------------------------GCTGC-------------
--------------------------------GCTGC-------------
CCACC---------------------------ACTCT-------------
--------------------------------ACTCT-------------
--------------------------------ACTCT-------------
--------------------------------ACTCTCT-----------
--------------------------------TCTCA-------------
--------------------------------TCTCG-------------
--------------------------------TCTCG-------------
--------------------------------TCTCA-------------
CGA-----------------------------TCTCT-------------
C-------------------------------ACTCCATCCTCTCT----
CCA-----------------------------TCTCTCTATCT-------
CCA-----------------------------TCTCTCTATCT-------
CGA-----------------------------TCTCT-------------
CGA-----------------------------TCTCT-------------
CGA-----------------------------TCTCT-------------
--------------------------------ACTC--------------
--------------------------------ACTCA-------------
CTCC----------------------------ACTCTAT-----------
--------------------------------ACTCTCT-----------
CCCCC---------------------------------------------
--------------------------------GCTCTTT-----------
--------------------------------ACTCT-------------
--------------------------------ACTCT-------------
--------------------------------ACTCC-------------
CCC-----------------------------ACTCCATCCTCTCT----
--------------------------------ACTCTCT-----------
--------------------------------GTTCT-------------
CCC-----------------------------ACTCCATCCTTTCT----
CC------------------------------------------------
CCTCTCCCC-----------------------ACTCG-------------
CCTCTCCCC-----------------------ACTCG-------------
CCTCTCCCC-----------------------ACTCG-------------
CCTCTCCCC-----------------------ACTCG-------------
--------------------------------ACTCC-------------
CAC-----------------------------ACTCTGC-----------
C-------------------------------TCTGT-------------
CAC-----------------------------ACTCTGC-----------
CAC-----------------------------ACTCTGC-----------
CAC-----------------------------ACTCTGC-----------
--------------------------------ACTCTAG-----------
CTCC----------------------------CCTCT-------------
--------------------------------TC-CTCCAT---------
--------------------------------GCTTT-------------
--------------------------------ACACTCT-----------
--------------------------------ACTCTAG-----------
--------------------------------ACTCTAG-----------
--------------------------------GCTCTCT-----------
--------------------------------GCTCTCT-----------
--------------------------------ACTCTCT-----------
--------------------------------ACTCTCT-----------
--------------------------------ACTCTCT-----------
CTCC----------------------------CCTCT-------------
CTCC----------------------------CCTCT-------------
CTCC----------------------------CCTCT-------------
TCCCC---------------------------ACCCTCT-----------
--------------------------------ATTCT-------------
--------------------------------ATTCT-------------
--------------------------------ATTCT-------------
--------------------------------ATTCT-------------
--------------------------------ATTCT-------------
--------------------------------ATTCT-------------
--------------------------------T-TTT-------------
--------------------------------ACTCC-------------
--------------------------------ACTCC-------------
--------------------------------ACTCT-------------
CC------------------------------ACTCT-------------
CC------------------------------ACTCT-------------
CC------------------------------ACTCT-------------
CC------------------------------ACTCT-------------
CC------------------------------ACTCT-------------
C-------------------------------GCTCTCTATCT-------
C-------------------------------GCTCTCTATCT-------
C-------------------------------GCTCTCTATCT-------
C-------------------------------GCTCTCTATCT-------
C-------------------------------GCTCTCTATCT-------
C-------------------------------GCTCTCTATTT-------
C-------------------------------GCTCTCTATCT-------
C-------------------------------GCTCTCTATTT-------
C-------------------------------GCTCTCTATCT-------
C-------------------------------ACTCT-------------
CG------------------------------ACTCT-------------
CG------------------------------ACTCT-------------
CC------------------------------ACTCT-------------
C-------------------------------TCTCTCT-----------
C-------------------------------ACACCGTACGC-------
C-------------------------------ACACCGTACGC-------
C-------------------------------ACACCGTACGC-------
C-------------------------------ACACCGTACGC-------
C-------------------------------ACACCGTACGC-------
T-------------------------------------------------
T-------------------------------------------------
C-------------------------------ACACCGTATGC-------
C-------------------------------ACACCGTACGC-------
C-------------------------------ACACCGTATGC-------
C-------------------------------ACACCGTATGC-------
C-------------------------------ACACCGTATGC-------
C-------------------------------GCTCG-------------
ACTT----------------------------ACTCTTT-----------
C-------------------------------TCTCCTCCTCCTCCCTT-
C-------------------------------TCTCCTCCTCCTCCCTT-
--------------------------------------------------
--------------------------------ACTCTGT-----------
--------------------------------------------------
C-------------------------------ACTTTCTCTGTCT-----
--------------------------------GCTCT-------------
TC------------------------------GCTCTCTCTCTCTCTCTC
TC------------------------------TCTCT-------------
TCT-----------------------------ACTCTCTCTCTGCAT---
TCT-----------------------------ACTCTCTCTCTGCAT---
CCCCACCTTCT---------------------ACTCTCTCTCTCTGCAT-
CCT-----------------------------ATCCTAT-----------
CCT-----------------------------ATCCTAT-----------
CCT-----------------------------ATCCTAT-----------
TC------------------------------GCACTCTCTCTCTCTCT-
--------------------------------------------------
TC------------------------------GCTCTCTCTCTCTCT---
TC------------------------------GCTCTCTCTCTCTCTCT-
TC------------------------------GCTCTCTCTCTCTCT---
CGGTGC--------------------------------------------
GC------------------------------------------------
CTCCCCTCCTGCC-------------------ACTCTCTCT---------
CTCCTCTCCTGCC-------------------ACTCTCTCT---------
--------------------------------ACTCT-------------
CGC-----------------------------ACTCTCT-----------
CGC-----------------------------ACTCTCT-----------
CGC-----------------------------ACTCTCT-----------
--------------------------------ACTCTCTCTCT-------
--------------------------------ACTCTCTCT---------
--------------------------------ACTCTCTCT---------
--------------------------------ACTCTCTCT---------
--------------------------------ACTCTCTCTCT-------
C-------------------------------ACACTGC-----------
--------------------------------ACGCTCT-----------
CTCGCGTC------------------------ACGCTCT-----------
CCC-----------------------------ACTCT-------------
C-------------------------------ACTCTCT-----------
--------------------------------ACTCT-------------
--------------------------------ACTCT-------------
--------------------------------ACTCT-------------
--------------------------------ACTCT-------------
--------------------------------ACTCT-------------
--------------------------------ACTCT-------------
CC------------------------------ACGTT-------------
--------------------------------ACCCT-------------
--------------------------------ACCCT-------------
--------------------------------ACTCT-------------
--------------------------------ACCCT-------------
CTCGCGTC------------------------ACGCTC------------
CTCGCCTC------------------------ACGCTCT-----------
CTCGCCTC------------------------ACGCTCT-----------
CTCGCCTC------------------------ACGCTCT-----------
CTCGCCTC------------------------ACGCTCT-----------
CCCCCTCCC-----------------------ACTCT-------------
CCCCCCCCTCCC--------------------ACTCT-------------
CCCCCCCC------------------------ACTCT-------------
CCGCCCCTCCC---------------------ACTCT-------------
CCCCCCCC------------------------ACTCT-------------
C-------------------------------ACTCGCT-----------
C-------------------------------ACTCGCT-----------
CCC-----------------------------ACTCTGCCT---------
--------------------------------------------------
--------------------------------------------------
CCTCCCCAC-----------------------ACCCT-------------
--------------------------------ACCCT-------------
--------------------------------CCTCT-------------
--------------------------------ACTCT-------------
--------------------------------ACTCT-------------
--------------------------------ACTCT-------------
G-------------------------------ACTCT-------------
G-------------------------------CATCT-------------
--------------------------------ACTCT-------------
CCCCCCTCCC----------------------ACTCT-------------
CCCCCTCCC-----------------------ACTCT-------------
--------------------------------ACTCTCT-----------
--------------------------------ACTCTCT-----------
--------------------------------ACTCTCT-----------
CC------------------------------GCTCT-------------
C-------------------------------ACCAT-------------
--------------------------------ACTC--------------
--------------------------------GCTC--------------
--------------------------------GCTC--------------
--------------------------------ACTC--------------
--------------------------------ACTC--------------
--------------------------------ACTC--------------
--------------------------------ACTC--------------
--------------------------------GCTC--------------
TG------------------------------TCTCT-------------
TG------------------------------TCTCT-------------
TG------------------------------TCTCT-------------
TGCTTTCCC-----------------------TCTCTCT-----------
GC------------------------------TCTCT-------------
GC------------------------------TCTCT-------------
--------------------------------TC-CT-------------
C-------------------------------ACCAT-------------
C-------------------------------ACCAT-------------
C-------------------------------ACCAT-------------
--------------------------------ACTCG-------------
--------------------------------GCCCT-------------
CG------------------------------ACTCT-------------
CG------------------------------ACTCT-------------
CG------------------------------ACTCT-------------
CTG-----------------------------TCTCT-------------
CTG-----------------------------TCTCT-------------
CTG-----------------------------TCTCT-------------
CTG-----------------------------TCTCT-------------
CCGC----------------------------ACTCTGCGC---------
--------------------------------ACTCT-------------
CCCCC---------------------------------------------
CC------------------------------ACTCGAT-----------
CCCCC---------------------------ACTCT-------------
CCCCCC--------------------------ACTCT-------------
CCC-----------------------------ACTCT-------------
CCC-----------------------------ACTCT-------------
CCCC----------------------------GCTCT-------------
CCC-----------------------------GCTCT-------------
A-------------------------------ACTCTCT-----------
CCGC----------------------------ACTGT-------------
CCGC----------------------------ACTGTAT-----------
--------------------------------------------------
--------------------------------------------------
--------------------------------------------------
--------------------------------------------------
--------------------------------------------------
GTGC----------------------------A-----------------
GTGC----------------------------A-----------------
GTGC----------------------------A-----------------
--------------------------------ATGCA-------------
CCTCCCCC------------------------GCTCT-------------
CCTCCCCC------------------------GCTCT-------------
--------------------------------ACACACCCCACTCT----
CC------------------------------ATTCT-------------
C-------------------------------ACTCTCTCT---------
GCG-----------------------------------------------
GC------------------------------ACTCTCT-----------
--------------------------------------------------
--------------------------------ACTGT-------------
C-------------------------------ACTCTGA-----------
C-------------------------------ACTCTGA-----------
C-------------------------------ACTCTGA-----------
GC------------------------------TCTCT-------------
GC------------------------------TCTCT-------------
CCAGCACCATCACCACCCC-------------ACTCTTT-----------
TTCCCTCTCTCCC-------------------ACTCTGTAC---------
CCTCCCCC------------------------GCTCT-------------
CCTCCCCC------------------------GCTCT-------------
CCTCCCCC------------------------GCTCT-------------
CCCTCCCCCC----------------------GCTTTTT-----------
CCCCTCCCCC----------------------ACACTCG-----------
CCA-----------------------------ACTCT-------------
CCA-----------------------------ACTCT-------------
CCC-----------------------------AAACTCT-----------
G-------------------------------ACTCG-------------
CCCC----------------------------TATCT-------------
G-------------------------------ACTCT-------------
CTCC----------------------------ACTCT-------------
TCCCCCCCCCGCCCCC----------------ACTCC-------------
TCCCCCCCCCGCCCCC----------------ACTCC-------------
--------------------------------------------------
--------------------------------ACCCG-------------
GC------------------------------CCCCTCGGC---------
GC------------------------------CCCCTCGGC---------
GC------------------------------CCCCTCGGC---------
CCCCCCA-------------------------ACTCT-------------
TTCCCTCTCTCCC-------------------ACTCT-------------
TTCCCTCTCTCCC-------------------ACTCT-------------
--------------------------------ACTCT-------------
CC------------------------------ACTCT-------------
TC------------------------------ACTCT-------------
TC------------------------------ACTCT-------------
--------------------------------ACTCTCTCTCT-------
--------------------------------ACTCTTG-----------
--------------------------------ACTCTTG-----------
--------------------------------ACTCTTG-----------
--------------------------------ACTCTTG-----------
CCCCTCCCCCGAC-------------------ACTCG-------------
CCCCTCCCCCGAC-------------------ACTCG-------------
CCCAA---------------------------ACTCT-------------
CCCAA---------------------------ACTCT-------------
CCCCCCACACACACACACACAAACACACA---CCTCTCT-----------
T-------------------------------GCTC--------------
T-------------------------------GCTC--------------
T-------------------------------GCTC--------------
CCCTCTCTCCCC--------------------ACTCCTT-----------
CCCTCTCTCCCC--------------------ACTTCTT-----------
CTCCCC--------------------------ACTCTAT-----------
--------------------------------TCCGT-------------
C-------------------------------CCTCTTTCT---------
C-------------------------------CCTCTTTCT---------
C-------------------------------ATTGT-------------
C-------------------------------ATTGT-------------
C-------------------------------ATTGT-------------
CG------------------------------ACTCT-------------
CG------------------------------ACTCT-------------
CCTCTCTCCCC---------------------ACTTCTT-----------
--------------------------------GCTCTT------------
--------------------------------GCTCT-------------
C-------------------------------CCTCTCTCT---------
C-------------------------------ACTCC-------------
C-------------------------------ACTCC-------------
C-------------------------------ACTCC-------------
C-------------------------------ACTCC-------------
CC------------------------------ACTCTCT-----------
CC------------------------------ACTCTCT-----------
CC------------------------------TCTAT-------------
CC------------------------------TCTAT-------------
--------------------------------------------------
CCACC---------------------------ATCTTTCGCCTT------
--------------------------------ACTCT-------------
--------------------------------ATTCT-------------
--------------------------------TCTTTCT-----------
--------------------------------TCTTTCT-----------
--------------------------------TCTTTCT-----------
--------------------------------TCTTTCT-----------
--------------------------------ACTCCCT-----------
--------------------------------ACTCCCT-----------
--------------------------------ACTTT-------------
ACACACACACACACCTCC--------------ACTCTT------------
CACCCCCCAC----------------------ACTCTCTCT---------
--------------------------------ACTCT-------------
CCCC----------------------------ACTCT-------------
CCCC----------------------------ACTCT-------------
CCCC----------------------------ACTCT-------------
--------------------------------ACTCT-------------
CCCCTACAC-----------------------GCTCTCTCTTTCTCT---
CCCCTACAC-----------------------GCTCTCTCTTTCTCT---
--------------------------------ACTCT-------------
--------------------------------GCTCG-------------
--------------------------------GCTCG-------------
C-------------------------------ATATACT-----------
CCGC----------------------------ACCGT-------------
GCCG----------------------------ACCCTCT-----------
--------------------------------ACTCC-------------
--------------------------------ACTCG-------------
--------------------------------ACTCG-------------
CCACCC--------------------------TCTTAT------------
CCACCC--------------------------TCTTAT------------
CCACCC--------------------------TCTTAT------------
C-------------------------------ATATT-------------
A-------------------------------ACTTT-------------
--------------------------------TCTCT-------------
CT------------------------------ACTCGCTCT---------
CG------------------------------ACCCTCTCT---------
CG------------------------------ACCCTCTCT---------
CG------------------------------ACCCTCTCT---------
CG------------------------------ACCCTCTCT---------
CG------------------------------ACCCTCTCA---------
CG------------------------------ACCCTCTCA---------
CCG-----------------------------TACCTCTCTCTCTCTCTC
CC------------------------------ACTCT-------------
--------------------------------ACCCT-------------
--------------------------------GCCCT-------------
C-------------------------------GCCCT-------------
CGCC----------------------------ACATTCCA----------
AA------------------------------GCGCGCTCC---------
CT------------------------------ACTCGCTCT---------
CT------------------------------ACTCGCTCT---------
CT------------------------------ACTCGCTCT---------
CT------------------------------ACTCGCTCT---------
--------------------------------------------------
CCG-----------------------------TATCTCTCTCTCTCTCTC
CCG-----------------------------TACCTCTCTCTC------
CCG-----------------------------TATCTCTCTCTCTCTCTC
TCTCTC--------------------------TCTCTC------------
--------------------------------ACCTT-------------
--------------------------------GCTCT-------------
C-------------------------------------------------
C-------------------------------GCCCT-------------
C-------------------------------GACCT-------------
C-------------------------------GCCCT-------------
C-------------------------------GCCCT-------------
C-------------------------------GCCCT-------------
--------------------------------GCCCT-------------
TC------------------------------ACTCTC------------
TC------------------------------ACTCTC------------
TC------------------------------ACTTTC------------
--------------------------------ACTCT-------------
--------------------------------GCACC-------------
--------------------------------GCACC-------------
CCCCGCGC------------------------ACTCTCCCT---------
CCCCCGC-------------------------ACTCTCCCT---------
--------------------------------GCCCT-------------
TCCC----------------------------CCTCTCT-----------
C-------------------------------ACTG--------------
--------------------------------GCTCT-------------
TTCC----------------------------------------------
CAAA----------------------------------------------
CCTTCCCCCAA---------------------ACTCTCT-----------
TACCCCCTC-----------------------ACTCCATTT---------
CCTCCCCCTT----------------------ACCCCTCT----------
CCA-----------------------------TCTCT-------------
CAA-----------------------------TCTGT-------------
CCA-----------------------------TCTCT-------------
CCA-----------------------------TCTCT-------------
CTC-----------------------------------------------
--------------------------------AACGTGCG----------
CCTCCC--------------------------ACTCTCTCTCTCT-----
CCTCCC--------------------------ACTCTCTCTCTCT-----
CCTCCC--------------------------ACTCTCTCTCT-------
A-------------------------------ACGCTCT-----------
CCTCCC--------------------------ACTCTCTCTCTCTCT---
CCTCCC--------------------------ACTCTCTCTCTCTCT---
--------------------------------ACATAGGAA---------
--------------------------------ACGC--------------
C-------------------------------GCTC--------------
--------------------------------ACACTAT-----------
--------------------------------ACTCT-------------
--------------------------------TCTGC-------------
CCTC----------------------------ACCAGCTCTCTCTCT---
CCTCACCA------------------------GCTCTCTCTCT-------
CCTCACCA------------------------GCTCTCTCTCT-------
CCA-----------------------------ACTCT-------------
CCA-----------------------------ACTCT-------------
CCA-----------------------------ACTCT-------------
--------------------------------ACTCT-------------
--------------------------------ACTCT-------------
C-------------------------------TCCCC-------------
GCC-----------------------------ACTCA-------------
TT------------------------------ACTCTCT-----------
T-------------------------------GCTCT-------------
--------------------------------AATCT-------------
--------------------------------ACTCGCT-----------
CCTCCC--------------------------ACTCTCTCTCTCTCTCT-
CG------------------------------AC----------------
--------------------------------CCTCTCT-----------
C-------------------------------ACTCCCT-----------
C-------------------------------ACTCCCT-----------
C-------------------------------ACTCCCT-----------
C-------------------------------GCTC--------------
--------------------------------ACTCT-------------
CCTCACCA------------------------GCTCTCTCTCTGC-----
C-------------------------------ACCCA-------------
CCCCCCCCCACCTCCACCCCGCGAAA------ACACACACACACACATTA
CCCCC---------------------------ACACACACACACATTAT-
CCCC----------------------------ACACACACACACACACAC
CCCCC---------------------------ACACACACACACACACTT
CCCCCCCC------------------------ACACACACACACCTCCAC
C-------------------------------GCTGTCT-----------
--------------------------------ACTCTCTCT---------
--------------------------------ACTCTCTCT---------
--------------------------------GCTCT-------------
--------------------------------GCTCT-------------
--------------------------------------------------
C-------------------------------ACTCT-------------
ACCACTCCACCCTTTCG---------------CCCCTTT-----------
--------------------------------TGCGTC------------
C-------------------------------ACTCTCT-----------
C-------------------------------ACTCTCT-----------
C-------------------------------ACTCTCT-----------
CAGGGTCCAGT---------------------GCCCTA------------
--------------------------------ATACTCT-----------
GCC-----------------------------------------------
--------------------------------ACTTG-------------
A-------------------------------GCTCTTTGGGCGTAT---
CAGC----------------------------ACGTGGTGTGTGAGCCTG
--------------------------------ACTCC-------------
GC------------------------------TCTCT-------------
--------------------------------ACTCTCT-----------
--------------------------------ACTCT-------------
--------------------------------ACTCT-------------
--------------------------------ACTCT-------------
--------------------------------ACTCT-------------
--------------------------------ACTCT-------------
CTCCCCCTCCCCTC------------------ACTGA-------------
GCCTCC--------------------------ACACG-------------
--------------------------------AGCCTTGC----------
--------------------------------GCTCTTTGGGCGTAT---
CC------------------------------ACTCTATTTCG-------
T-------------------------------TCTCT-------------
--------------------------------ACTCG-------------
--------------------------------ACTCG-------------
--------------------------------ACTCG-------------
C-------------------------------ACTCTATGC---------
C-------------------------------ACTCTATGC---------
--------------------------------ACTCT-------------
--------------------------------ACTCT-------------
TCC-----------------------------ACTCT-------------
--------------------------------ACTCT-------------
C-------------------------------TCTTT-------------
C-------------------------------TCTTT-------------
--------------------------------ACTCT-------------
TCC-----------------------------ACTCTTT-----------
CCC-----------------------------ACGCTCT-----------
CGT-----------------------------TCTCT-------------
TCC-----------------------------ACACC-------------
TCC-----------------------------ACACC-------------
TCC-----------------------------ACACC-------------
--------------------------------ACTCT-------------
--------------------------------ACTCC-------------
--------------------------------CCTCC-------------
CC------------------------------ACTCT-------------
CC------------------------------ACTCT-------------
CC------------------------------ACTCT-------------
CC------------------------------ACTCT-------------
--------------------------------ACTCT-------------
CCCCCC--------------------------ACT---------------
--------------------------------AGCCTTGC----------
A-------------------------------GCTCTTTGGGCGTAT---
A-------------------------------GCTCTTTGGGCGTAT---
A-------------------------------GCTCTTTGGGCGTAT---
A-------------------------------GCTCTTTGGGCGTAT---
--------------------------------------------------
CCCCTCCCC-----------------------ACTGT-------------
CCCCTCCCC-----------------------ACTAT-------------
CCCCTCCCC-----------------------ACTGT-------------
--------------------------------ACA---------------
TTC-----------------------------ACACACTCACACAAGCAT
CGGCGC--------------------------ACAGT-------------
CGGCGC--------------------------ACAGT-------------
CGGCGC--------------------------ACAGT-------------
CGGCGC--------------------------ACAGT-------------
CGGCGC--------------------------ACAGT-------------
--------------------------------ACTCC-------------
--------------------------------ACTCC-------------
C-------------------------------ACTCTTT-----------
C-------------------------------TCTTCTGTTTCCTTTTTT
TTC-----------------------------TTCCTG------------
TCTG----------------------------TCTCT-------------
A-------------------------------TCT---------------
A-------------------------------TCT---------------
A-------------------------------TCT---------------
TACT----------------------------ACCCT-------------
TCTG----------------------------TCTCT-------------
--------------------------------ACTCT-------------
--------------------------------AATCGA------------
--------------------------------AATCGA------------
--------------------------------ACTCGAT-----------
--------------------------------ACTCGAT-----------
GC------------------------------ACTCT-------------
--------------------------------ATTCT-------------
--------------------------------ATTCT-------------
--------------------------------ATTCT-------------
--------------------------------ATTCT-------------
--------------------------------ATTCT-------------
--------------------------------ATTCT-------------
--------------------------------ACTCC-------------
T-------------------------------GCCCTCT-----------
CTCTCCACATACACACACACACACAC------ACTGTTT-----------
C-------------------------------ACTCT-------------
CCC-----------------------------AC----------------
C-------------------------------ACTCTTT-----------
C-------------------------------ACTCTTT-----------
C-------------------------------TCTGC-------------
CG------------------------------ACG---------------
--------------------------------TTTTCCTTTAGATTT---
CCACC---------------------------ACACACACACACACACAC
CG------------------------------ACAAG-------------
CCCCCTCAAC----------------------ACTGC-------------
--------------------------------ACTCT-------------
--------------------------------GTTCC-------------
CCCTCCTCCTCCC-------------------GCTCTCT-----------
CC------------------------------------------------
--------------------------------------------------
--------------------------------------------------
C-------------------------------ACACTCA-----------
CC------------------------------AATGTAT-----------
C-------------------------------ACTCTAT-----------
C-------------------------------ACTCTAT-----------
--------------------------------ACTCT-------------
C-------------------------------ACTCT-------------
C-------------------------------ACTCT-------------
C-------------------------------ACTCT-------------
--------------------------------TCTTT-------------
--------------------------------TCTTT-------------
CA------------------------------AATGT-------------
--------------------------------------------------
CCTTCC--------------------------ACTCG-------------
--------------------------------------------------
--------------------------------------------------
TCC-----------------------------ATCCT-------------
CCCCTCCA------------------------ACTCT-------------

--------------------------------------------------
------------------------------------------------GC
------------------------------------------------GT
----------------------------------------------GCGT
------------------------------------------------GC
------------------------------------------------GT
----------------------GTGTCTGTGTGCGTGTGTGCGTGTGTGT
ACCGC-------------------------------------------GT
CTCAACACT-------------------------------------GTGT
------------------------------------------GTGTGTGT
------------------------------------GTGTGTTTGTGTGT
--------------------------------------------GTGTGT
------------------------------------GTGTGTGTGTGTGT
------------------------------------------------GT
----------------------------------------------GTGT
------------------------------------------------GT
TCTCTCT-------------------------------------GTGTGT
T-----------------------------------------------GT
------------------------------------------------GT
T-----------------------------------------------GT
TCTCT-------------------------------------------GT
--------------------------------------------------
--------------------------------------------------
--------------------------------------------------
--------------------------------------------------
--------------------------GTGTGTGTGTGTGTGTGTGTGTGT
------------------------------------------------GA
-------------------------------------------------T
--------------------------------------------------
--------------------------------------------------
----------------------------GTGTGTGTGTGTGTGTGTGTGT
-------------------------------------------GCGGGGT
------------------------------------------------GT
------------------------------------------------TT
------------------------------------------------GC
------------------------------------------------GC
--------------------------------------GTGTGTGTGTGT
------------------------------------------------GG
------------------------------------------------GG
------------------------------------------------GG
------------------------------------------------GG
--------------------------------------------------
------------------------------------------------GC
------------------------------------------------GC
------------------------------------------------GC
------------------------------------------------GC
------------------------------------------------GC
------------------------------------------------GC
------------------------------------------------GT
------------------------------------------------GT
------------------------------------------------GT
------------------------------------------------GT
------------------------------------------------GT
------------------------------------------------GC
--------------------------------------------------
------------------------------------------------GC
------------------------------------------------GC
------------------------------------------------GT
------------------------------------------------GT
------------------------------------------------GC
--------------------------------------------------
------------------------------------------------GT
GC----------------------------------------------GT
------------------------------------------------GT
--------------------------------------------------
--------------------------------------------------
------------------------------------------------GC
------------------------------------------------GC
------------------------------------------------GC
------------------------------------------------GT
------------------------------------------------GT
--------------------------------------------------
-------------------------------------------------T
------------------------------------------------GT
-----------------------------------------------GGT
------------------------------------------------GT
------------------------------------------------GT
------------------------------------------------GT
------------------------------------------------GT
------------------------------------------------GT
------------------------------------------------GT
------------------------------------------------GT
--------------------------------------------------
------------------------------------------------GT
------------------------------------------------GT
------------------------------------------------GT
------------------------------------------------GT
------------------------------------------------GT
------------------------------------------------GT
------------------------------------------------GT
------------------------------------------------GT
------------------------------------------------GT
------------------------------------------------GT
------------------------------------------------GG
----------------------------------GTGTGTGTGTGTGTGT
--------------------------------------GTGTGTGTGTGT
-----------------------------GTGGGTGTGTGGTGGTGGTGT
-----------------------------GTGGGTGTGTGGTGGTGGTGT
------------------------------------------------CT
------------------------------------------------CT
------------------------------------------------CT
------------------------------------------------CT
------------------------------GTGTGTGTGTGTGTGTGTGT
--------------------------------------GTGTGTGTGTGT
------------------------------------------------GT
--------------------------------------------------
--------------------------------------------------
------------------------------------------------GT
------------------------------------------------GT
TCTGCGCGTGGCA-----------------------------------GC
------------------------------------------------GT
------------------------------------------------GT
------------------------------------------------GT
------------------------------------------------GT
------------------------------------------------GT
------------------------------------------------GT
------------------------------------------------GT
------------------------------------------------GT
--------------------------------------------------
---------------------------------------------GTTGT
------------------------------------------------GT
------------------------------------------------GT
------------------------------------------------GC
------------------------------------------GAGTGTGT
------------------------------------------GAGTGTGT
------------------------------------------------GT
------------------------------------------------GT
------------------------------------------------GT
----------------------------------------------GTGT
------------------------------------------------GT
------------------------------------------------GT
------------------------------------------------GT
------------------------------------------------GT
------------------------------------------------GA
------------------------------------------------GT
----------------------------------------------GCGC
----------------------------------------------GCGT
------------------------------------------------GA
----------------------------------------------GCGC
----------------------------------------------GCGC
----------------------------------------------GCGC
------------------------------------------------GA
----------------------------------------GTGTGTGTGT
----------------------------------------GTGTGTGTGT
----------------------------------------GTGTGTGTGT
----------------------------------------GTGTGTGTGT
--------------------------------------------------
------------------------------------------------GT
------------------------------------------------GT
----------------------------------------------GTGT
------------------------------------------------CT
------------------------------------------------CT
------------------------------------------------CT
------------------------------------------------CT
------------------------------------------------CT
------------------------------------------------CT
------------------------------------------------CT
--------------------------------------------------
--------------------------------------------------
--------------------------------------------------
--------------------------------------------------
--------------------------------------------------
------------------------------------------------GT
------------------------------------------------CT
----------------------------------------------GTGT
----------------------------------------------GTGT
----------------------------------------------GTGT
----------------------------------------------GTGT
--------------------------------------------GTGCGT
--------------------------------------------GTGCGT
------------------------------------------------AT
------------------------------------------------GG
------------------------------------------------GC
------------------------------------------------GT
------------------------------------------------GT
------------------------------------------------GT
------------------------------------------------GT
------------------------------------------------GT
------------------------------------------------GT
------------------------------------------------GT
------------------------------------------------AT
--------------------------------------------------
------------------------------------------------AT
------------------------------------------------AT
------------------------------------------------AT
------------------------------------------------GT
------------------------------------------------GT
------------------------------------------------GT
-------------------------------------------------T
--------------------------------------------------
-----------------------------------------GTGTGTGTT
--------------------------------------GCGTGTGTGTGT
-----------------------------------------GTGTGTGTT
----------------------------------GCGTGTGTGTGTGTGT
------------------------------------GCGTGTGTGTGTGT
--------------------------------------------------
----------------------------------------------GTGT
------------------------------------------------GT
------------------------------------------------GT
------------------------------------------------GT
------------------------------------------------GT
------------------------------------------------GT
------------------------------------------------GT
----------------------------------GTGTTTGTTTGCGTGT
--------------------------------------------------
--------------------------------------------------
------------------------------------------------GT
------------------------------------------------GC
------------------------------------------------GT
------------------------------------------------GC
------------------------------------------------GC
------------------------------------------------GC
------------------------------------------------GC
------------------------------------------------GT
----------------------------------------------GTGT
----------------------------------------------GTGT
------------------------------------------------GT
------------------------------------------------GT
--------------------------------------------------
--------------------------------------------------
--------------------------------------------------
--------------------------------------------------
--------------------------------------------------
------------------------------------------------GT
------------------------------------------------GT
------------------------------------------------GT
------------------------------------------------GT
------------------------------------------------GT
------------------------------------------------GT
----------------------------------------------GTGT
----------------------------------------------GTGT
----------------------------------------------GTGT
--------------------------------------------------
--------------------------------------------------
------------------------------------------------GT
----------------------------------------------GTGT
----------------------------------------------GTGT
--------------------------------------------GTGTGT
--------------------------------------------GTGTGT
------------------------------------------------CT
------------------------------------------------GT
------------------------------------------------GT
----------------------------------------------GTGT
------------------------------------------------GG
T-----------------------------------------------GT
T-----------------------------------------------GT
T-----------------------------------------------GT
T-----------------------------------------------GT
TTT---------------------------------------------GT
----------------------------------------------GTGT
----------------------------------------------GTGT
----------------------------------------------GTGT
----------------------------------------------GTGT
----------------------------------------------GTGT
----------------------------------------------GTGT
TCCTT-------------------------------------------GT
-----------------------------------------------TGT
-----------------------------------------------TGT
------------------------------------------------GT
------------------------------------------------GT
------------------------------------------------GT
------------------------------------------------GT
------------------------------------------------GT
------------------------------------------------GT
------------------------------------------------GT
------------------------------------------------GT
TCCTT-------------------------------------------GT
------------------------------------------------GT
------------------------------------------------GT
------------------------------------------------GT
----------------------------------------------GTGT
----------------------------------------------GCGT
------------------------------------------GTGTGGGT
----------------------------------------------GTGT
----------------------------------------------GTGT
----------------------------------------------GTGT
----------------------------------------------GTGT
----------------------------------------------GTGT
--------------------------------------------GTGTGT
--------------------------------------------------
------------------------------------------------GT
------------------------------------------------GT
------------------------------------------------GT
------------------------------------------------GT
------------------------------------------------GT
----------------------------------------------GTGT
------------------------------------------------GC
------------------------------------------------GC
-----------------------------------------------TGC
------------------------------------------------GT
-----------------------------------------------TGC
------------------------------------------------GT
------------------------------------------------GT
------------------------------------------------GT
------------------------------------------------GT
------------------------------------------------GT
-------------------------------------------GCCTTGC
--------------------------------------------GTGTGT
------------------------------------------------GC
------------------------------------------------GT
------------------------------------------------GT
------------------------------------------------GT
------------------------------------------------GT
----------------------------------------------GCGT
----------------------------------------------GTGT
--------------------------------------------------
--------------------------------------------------
--------------------------------------------------
--------------------------------------------------
--------------------------------------------------
------------------------------------------------AC
------------------------------------------------AC
------------------------------------------------GG
------------------------------------------------GG
------------------------------------------------AC
------------------------------------------------AC
------------------------------------------------GT
------------------------------------------------GT
------------------------------------------------GT
------------------------------------------------GT
------------------------------------------------GT
------------------------------------------------GG
------------------------------------------------GT
------------------------------------------------GT
------------------------------------------------GT
------------------------------------------------GT
------------------------------------------------GT
------------------------------------------------GT
------------------------------------------------GT
------------------------------------------------GT
------------------------------------------------GT
------------------------------------------------GT
------------------------------------------------GT
------------------------------------------------GT
------------------------------------------------GT
------------------------------------------------GT
------------------------------------------------GT
------------------------------------------------GC
------------------------------------------------GT
------------------------------------------------GT
------------------------------------------------GT
------------------------------------------------GT
------------------------------------------------GT
------------------------------------------------GT
--------------------------------------------GTGTGT
--------------------------------------------GTGTGT
--------------------------------------------GTGTGT
--------------------------------------------GTGTGT
--------------------------------------------GTGTGT
--------------------------------------------GTGTGT
--------------------------------------------GTGTGT
------------------------------------------------GT
--------------------------------------------------
------------------------------------------------GT
------------------------------------------------GT
------------------------------------------GCGTGTGT
------------------------------------------GCGTGTGT
------------------------------------------GCGTGTGG
------------------------------------------GCGTGTGG
------------------------------------------------GT
--------------------------------------------------
------------------------------------------------GT
--------------------------------------------------
--------------------------------------------------
--------------------------------------------------
--------------------------------------------------
------------------------------------------------TT
------------------------------------------------GT
----------------------------------------------GTGT
----------------------------------------------GTGT
----------------------------------------------GTGT
------------------------------------------------GT
------------------------------------------------GT
------------------------------------------------GT
------------------------------------------------CT
------------------------------------------------AT
------------------------------------------------GT
------------------------------------------------GT
------------------------------------------------GG
------------------------------------------------GC
------------------------------------------------GC
------------------------------------------------GT
------------------------------------------------GT
------------------------------------------------GG
--------------------------------------------------
-------------------------------------------------T
-----------------------------------------------GGT
-----------------------------------------------TGC
------------------------------------------------GT
--------------------------------------GTGTGTGTGTGT
--------------------------------------------------
--------------------------------------------------
--------------------------------------------------
--------------------------------------------------
--------------------------------------------------
----------------------------------------------GTGT
--------------------------------------------------
--------------------------------------------------
-----------------------------------------------GGT
-----------------------------------------------GGT
-----------------------------------------------GGC
------------------------------------------------GT
------------------------------------------------GG
------------------------------------------------GT
----------------------------------------GTGTGTGTGT
----------------------------------------GTGTGTGTGT
--------------------------------GTGTGTGTGTGTGTGTGT
----------------------------------------GTGTGTGTGT
------------------------------------------------GT
------------------------------------------------GT
--------------------------------------------GTGTGT
----------------------------------------------GTGT
----------------------------------------------GTGT
--------------------------------------------GTGTGT
----------------------------------------------GTGT
----------------------------------------------GTGT
---------------------------------------TGTGTGTGTGT
--------------------------------------------------
--------------------------------------------GTGTGT
------------------------------------------------GT
----------------------------------------------GTGT
----------------------------------------------GTGT
------------------------------------------------GT
------------------------------------------------GC
------------------------------------------------GC
------------------------------------------------GC
------------------------------------------------GC
------------------------------------------------CT
------------------------------------------------CT
--------------------------------------------------
--------------------------------------------------
------------------------------------------------GT
------------------------------------------------GT
------------------------------------------------GT
----------------------------------------------GTGT
----------------------------------------------GTGT
----------------------------------------------GTGT
----------------------------------------------GTGT
----------------------------------------------GTGT
----------------------------------------------GTGT
----------------------------------------------GAGT
----------------------------------------------GGGC
----------------------------------------------GGGC
------------------------------------------------GA
------------------------------------------------GA
------------------------------------------------GA
------------------------------------------------GT
------------------------------------------------GT
------------------------------------------------GT
------------------------------------------------GT
------------------------------------------------GT
----------------------------------------------GTGT
------------------------------------------------GC
------------------------------------------------GT
------------------------------------------------GT
----------------------------------------------GTGT
----------------------------------------------GTGT
----------------------------------------------GTGT
-----------------------------------------------TGC
----------------------------------------------GTGT
------------------------------------------------GC
------------------------------------------------GC
--------------------------------------------------
------------------------------------------------CT
------------------------------------------------GT
------------------------------------------------GT
--------------------------------------------------
------------------------------------------------GC
------------------------------------------------GC
------------------------------------------------GT
------------------------------------------------GC
--------------------------------------------------
----------------------------------------------GTGT
----------------------------------------------GTGT
----------------------------------------------GTGT
----------------------------------------------GTGT
----------------------------------------------GTGT
------------------------------------------------GT
------------------------------------------------GT
------------------------------------------------GT
------------------------------------------------GT
------------------------------------------------GT
------------------------------------------------GT
------------------------------------------------GT
--------------------------------------------------
------------------------------------------------CT
------------------------------------------------GT
------------------------------------------------GT
------------------------------------------------GT
------------------------------------------------GT
------------------------------------------------GT
------------------------------------------------GT
------------------------------------------------GT
------------------------------------------------GT
------------------------------------------------GT
------------------------------------------------GT
------------------------------------------------GT
------------------------------------------------TT
-----------------------------------------------GTG
-----------------------------------------------GTG
-----------------------------------------------GTG
-----------------------------------------------GTG
-----------------------------------------------GTG
-----------------------------------------------GTG
------------------------------------------------TT
----------------------------------------------GTGT
----------------------------------------------GTGT
----------------------------------------------GTGT
------------------------------------------------GT
------------------------------------------------GT
------------------------------------------------GT
------------------------------------------------GT
------------------------------------------------GT
----------------------------------GTGTGTGTGTGTGTGT
------------------------------------GTGTGTGTGTGTGT
----------------------------------GTGTGTGTGTGTGTGT
------------------------------------GTGTGTGTGTGTGT
------------------------------------GTGTGTGTGTGTGT
------------------------------------GTGTGTGTGTGTGT
----------------------------------GTGTGTGTGTGTGTGT
------------------------------------GTGTGTGTGTGTGT
----------------------------------GTGTGTGTGTGTGTGT
------------------------------------------------GT
------------------------------------------------GT
------------------------------------------------GT
------------------------------------------------GT
--------------------------------------------------
-----------------------------------------------GGT
-----------------------------------------------GGT
-----------------------------------------------GGT
-----------------------------------------------GGT
-----------------------------------------------GGT
------------------------------------------------GT
------------------------------------------------GT
-----------------------------------------------GGT
-----------------------------------------------GGT
-----------------------------------------------GGT
-----------------------------------------------GGT
-----------------------------------------------GGT
------------------------------------------------GT
----------------------------------------------GTGT
-----------------------------------------------GAT
-----------------------------------------------GAT
--------------------------------------------------
------------------------------------------------GT
--------------------------------------------------
----------------------------------------------GGGT
------------------------------------------------GT
T---------------------------------------------GTGT
------------------------------------------------GT
-------------------------------------------GTGTTGT
-------------------------------------------GTGTTGT
-------------------------------------------GTGTTGT
------------------------------------------------CT
------------------------------------------------CT
------------------------------------------------CT
----------------------------------------------GTGT
--------------------------------------------------
------------------------------------------------GT
------------------------------------------------GT
------------------------------------------------GT
------------------------------------------GTGTGCGT
------------------------------------------------GT
------------------------------------------------GT
------------------------------------------------GT
------------------------------------------------GA
------------------------------------------------GT
------------------------------------------------GT
------------------------------------------------GT
------------------------------------------------GT
------------------------------------------------GT
------------------------------------------------GT
------------------------------------------------GT
------------------------------------------------GT
------------------------------------------------GT
------------------------------------------------GC
----------------------------------------------GTGT
------------------------------------------------GC
------------------------------------------------GT
------------------------------------------------GT
------------------------------------------------GT
------------------------------------------------GT
------------------------------------------------GT
------------------------------------------------GT
------------------------------------------------GT
----------------------------------------------GTGT
----------------------------------------GTGTGTGTGT
----------------------------------------GTGTGTGTGT
------------------------------------------------GT
----------------------------------------GTGTGTGTGT
---------------------------------------------TGTGT
----------------------------------------------GTGT
----------------------------------------------GTGT
----------------------------------------------GTGT
----------------------------------------------GTGT
----------------------------------------------GCGT
----------------------------------------------GCGT
----------------------------------------------GTGT
----------------------------------------------GCGT
----------------------------------------------GCGT
------------------------------------------------GT
------------------------------------------------GT
------------------------------------------------GC
--------------------------------------------------
--------------------------------------------------
----------------------------------------------GTGT
----------------------------------------GTGTGTGTGT
--------------------------------------------GTCTGT
-------------------------------------------------T
-------------------------------------------------T
-------------------------------------------------T
----------------------------------------------GCGT
----------------------------------------------GCGT
----------------------------------------------GTGT
----------------------------------------------GCGT
----------------------------------------------GCGT
----------------------------------------------GTGT
----------------------------------------------GTGT
----------------------------------------------GTGT
------------------------------------------------GT
------------------------------------------------GC
-----------------------------------------------GGC
-----------------------------------------------GGC
-----------------------------------------------GGC
-----------------------------------------------GGC
-----------------------------------------------GGC
-----------------------------------------------GGC
-----------------------------------------------GGC
-----------------------------------------------GGC
------------------------------------------------GC
------------------------------------------------GC
------------------------------------------------GC
------------------------------------------------GC
------------------------------------------------GC
------------------------------------------------GC
--------------------------------------------------
------------------------------------------------GC
------------------------------------------------GC
------------------------------------------------GC
------------------------------------------------GC
----------------------------------------------GTTT
----------------------------------------------GTGT
----------------------------------------------GTGT
----------------------------------------------GTGT
------------------------------------------------GC
------------------------------------------------GC
------------------------------------------------GC
------------------------------------------------GC
------------------------------------------------GT
------------------------------------------------GT
--------------------------------------------------
------------------------------------------------GT
------------------------------------------------GT
------------------------------------------------GT
------------------------------------------------GT
------------------------------------------------GT
------------------------------------------------GT
------------------------------------------------GT
------------------------------------------------GC
--------------------------------------------GTGTGT
----------------------------------------------GTGT
--------------------------------------------------
--------------------------------------------------
--------------------------------------------------
--------------------------------------------------
--------------------------------------------------
------------------------------------------------GT
------------------------------------------------GT
------------------------------------------------GT
------------------------------------------------GT
--------------------------------------------GTGTGT
--------------------------------------------GTGTGT
------------------------------------GTGTGTTTGTGTGT
------------------------------------GTGTGTTTGTGTGT
------------------------------------------------CT
--------------------------------------------------
------------------------------------------------GG
------------------------------------------------G-
------------------------------------------------GT
----------------------------------------------GTGT
----------------------------------------------GTGT
----------------------------------------------GTGT
----------------------------------------------GTGT
----------------------------------------------GTGT
----------------------------------------------GTGT
------------------------------------------------GT
----------------------------------------------GTGT
----------------------------------------------GTGT
----------------------------------------------GTGT
----------------------------------------------GTGT
------------------------------------------------GT
----------------------------------------------GTGT
----------------------------------------------GTGT
------------------------------------------------GT
------------------------------------------------GT
------------------------------------------------GT
------------------------------------------------GT
--------------------------------------------GTGTGT
--------------------------------------------------
--------------------------------------------------
--------------------------------------------------
------------------------------------------------GT
------------------------------------------------GT
------------------------------------------------GT
------------------------------------------------GT
--------------------------------------------GTACGC
--------------------------------------------GTACGT
--------------------------------------------GTACGT
----------------------------------------------GTGT
------------------------------------GTGTGTTTGTGTGT
--------------------------------------GTGTTTTTGTGT
--------------------------------------GTGTTTTTGTGT
------------------------------------------------GT
------------------------------------------------GT
------------------------------------------------GT
------------------------------------------------GT
------------------------------------------------GT
------------------------------------------------GT
------------------------------------------------GT
----------------------------------------------GTGT
----------------------------------------------GTGT
------------------------------------------------GT
------------------------------------------------GT
------------------------------------------------GT
------------------------------------------------GT
------------------------------------------------CT
------------------------------------------------CT
------------------------------------------------GT
------------------------------------------------TT
------------------------------------------------CT
------------------------------------------------CT
------------------------------------------------GT
------------------------------------------------GT
------------------------------------------------GT
--------------------------------------------GTCTGT
--------------------------------------------GTCTGT
------------------------------------------------CT
------------------------------------------------GT
----------------------------------------------GTGT
------------------------------------------------GG
------------------------------------------------GT
------------------------------------------------GT
------------------------------------------------GT
------------------------------------------------GT
------------------------------------GTGTGTGTATGGGT
------------------------------------GTGTGTGTATGGGT
------------------------------------------------GT
------------------------------------------------GT
--------------------------------------------------
------------------------------------------------GC
------------------------------------------------GC
------------------------------------------------GC
------------------------------------------------CT
------------------------------------------------CT
------------------------------------------------CT
------------------------------------------------CT
------------------------------------------------CT
------------------------------------------------CT
------------------------------------------------GT
------------------------------------------------GT
------------------------------------------------GC
------------------------------------------------GT
--------------------------------------------GCGTGT
--------------------------------------------GCGTGT
--------------------------------------------GCGTGT
------------------------------------------------GC
------------------------------------------------GT
------------------------------------------------GT
------------------------------------------------GT
------------------------------------------------GT
------------------------------------------------GT
----------------------------------------------GTGT
------------------------------------------------GC
----------------------------------------------CTGG
----------------------------------------------GTGT
------------------------------------------------GC
------------------------------------------------GC
------------------------------------------------GA
------------------------------------------------GA
------------------------------------------------GA
----------------------------------------------GTGT
------------------------------------GTGTGTGTGTGTGT
--------------------------------------------------
------------------------------------------------GT
------------------------------------------------GG
------------------------------------------------GG
------------------------------------------------GG
------------------------------------------------GG
------------------------------------------------GG
------------------------------------------------GG
-----------------------------------------------GGT
------------------------------------------------CT
----------------------------------------------GTGT
------------------------------------------------GT
------------------------------------------------GT
------------------------------------------------GG
------------------------------------------------CT
------------------------------------------------GT
------------------------------------------------GT
------------------------------------------------GT
------------------------------------------------GT
-------------------------------------------------T
TC---------------------------------------------GGT
-----------------------------------------------GGT
-----------------------------------------------GGT
-----------------------------------------------GGT
----------------------------------------------GTGT
-------------------------------------------GCTGCGT
------------------------------------------------AG
------------------------------------------------GT
------------------------------------------------GT
------------------------------------------------GT
------------------------------------------------GT
------------------------------------------------GT
------------------------------------------------GT
-----------------------------------------------GGT
-----------------------------------------------GGT
-----------------------------------------------GGT
----------------------------------------------GTGT
------------------------------------------------GT
------------------------------------------------GT
------------------------------------------------GT
------------------------------------------------GT
------------------------------------------------GT
--------------------------------------GTGTGTGTGTGT
--------------------------------------------------
------------------------------------------------AT
------------------------------------------------GT
------------------------------------------------GT
------------------------------------------------GT
------------------------------------------------CC
------------------------------------------------GC
----------------------------------------------GTGT
----------------------------------------------GTGT
----------------------------------------------GTGT
----------------------------------------------GTGT
-------------------------------------------------T
-----------------------------------CCGGCTCATTCTGGT
------------------------------------------GAGTGTGT
------------------------------------------GAGTGTGT
------------------------------------------GAGTGTGT
----------------------------------------GCGTGTCTGT
------------------------------------------GAGTGTGT
------------------------------------------GAGTGTGT
--------------------------------------------------
-----------------------------------------------AGG
--------------------------------------------------
------------------------------------------------GG
------------------------------------------------GT
------------------------------------------------GC
----------------------------------------------GCGT
----------------------------------------------GCGT
----------------------------------------------GCGT
------------------------------------------GTGTGTGT
------------------------------------------GTGTGTGT
------------------------------------------GTGTGTGT
------------------------------------------------GT
------------------------------------------------GT
--------------------------------------------------
----------------------------------------------GCGT
------------------------------------------------GT
------------------------------------------------GT
--------------------------------------------GTGTGT
------------------------------------------------GT
------------------------------------------GAGTGTGT
------------------------------------------------GT
--------------------------------------GTGTGTGTGTGT
------------------------------------------------GT
------------------------------------------------GT
------------------------------------------------GT
--------------------------------------------------
------------------------------------------------GT
------------------------------------------------GT
------------------------------------------------GT
T-------------------------------------------GTCTGT
--------------------------------------------GTCTGT
CTCCACCCCGCGAAAACACACACACACACACACACATTAT----GTCTGT
CCACCCCGCGAAAACACACACACACACATTAT------------GTCTGT
CCCGCGAAAACACACACACACACACACACATTAT----------GTCTGT
------------------------------------------------GT
----------------------------------------GTGTGTGCGT
----------------------------------------GTGTGTGCGT
------------------------------------------------GT
------------------------------------------------GT
--------------------------------------------------
------------------------------------------------GT
------------------------------------------------CT
------------------------------------------------GT
------------------------------------------------GC
------------------------------------------------GC
------------------------------------------------GC
----------------------------------------------CCGT
------------------------------------------------GT
--------------------------------------------------
------------------------------------------------GT
------------------------------------------------GG
GCACCCGCGCT-----------------------------------GTGT
------------------------------------------------GT
------------------------------------------------GT
----------------------------------------------GTGT
----------------------------------------------GTGT
----------------------------------------------GTGT
----------------------------------------------GTGT
----------------------------------------------GTGT
----------------------------------------------GTGT
------------------------------------------------GT
------------------------------------------------GT
------------------------------------------------GT
------------------------------------------------GG
------------------------------------------------GT
------------------------------------------------GG
------------------------------------------------GT
------------------------------------------------GT
------------------------------------------------GT
------------------------------------------------GT
------------------------------------------------GT
------------------------------------------------GT
------------------------------------------------GT
------------------------------------------------GT
----------------------------------------------GTGT
------------------------------------------------GT
------------------------------------------------GT
------------------------------------------------GT
------------------------------------------------GT
--------------------------------------------GGGCGT
----------------------------------------------GTGT
------------------------------------------------GT
------------------------------------------------GT
------------------------------------------------GT
------------------------------------------------GT
--------------------------------------------------
--------------------------------------------------
------------------------------------------------GT
------------------------------------------------GT
------------------------------------------------GT
------------------------------------------------GT
------------------------------------------------CT
------------------------------------------------TT
------------------------------------------------GT
------------------------------------------------AG
------------------------------------------------GG
------------------------------------------------GT
------------------------------------------------GG
--------------------------------------------------
------------------------------------------GTGTGTGT
------------------------------------GTGTGTGTGTGTGT
------------------------------------------GTGTGTGT
------------------------------------------------TT
TC---------------------------------------------TGT
----------------------------------------------GCGT
----------------------------------------------GCGT
----------------------------------------------GCGT
--------------------------------------------GCGTGT
--------------------------------------------GCGTGT
------------------------------------------------GT
------------------------------------------------GT
------------------------------------------------GT
CTCTATGCACAACAACACCTGGATGAC---------------------GC
------------------------------------------------GT
--------------------------------------GTGTGCGTGTGT
------------------------------------------------GC
------------------------------------------------GC
------------------------------------------------GC
----------------------------------------------GTGT
------------------------------------GTGTGCGTGTGTGT
------------------------------------------------GT
-------------------------------------------------T
-------------------------------------------------T
------------------------------------------------GT
------------------------------------------------GT
------------------------------------------------GT
------------------------------------------------GT
------------------------------------------------GT
------------------------------------------------GT
------------------------------------------------GT
------------------------------------------------GT
------------------------------------------------GT
------------------------------------------------GT
------------------------------------------------GG
------------------------------------------------GT
------------------------------------------------GT
-------------------------------------------------T
------------------------------------------------GT
------------------------------------------------GT
------------------------------------------------CC
------------------------------------------------CA
--------------------------------------------------
ACACACCGC---------------------------------------GT
------------------------------------------------GT
------------------------------------------------GT
------------------------------------------------GT
------------------------------------------------GT
----------------------------------------------GTGT
------------------------------------------------GT
------------------------------------------------GC
------------------------------------------------GC
------------------------------------------------GT
----------------------------------------------GTGT
----------------------------------------------GTGT
----------------------------------------------GTGT
------------------------------------------------GT
----------------------------------------------GTGT
----------------------------------------------GTGT
----------------------------------------------GTGT
------------------------------------------------GT
------------------------------------------------GT
----------------------------------------------GTGT
--------------------------------------------------
----------------------------------------------GTGT
--------------------------------------------------
--------------------------------------------------
------------------------------------------------GT
------------------------------------GTGTGTGTGTGTGT

--------------------------------------------------
A---------------------G-GGA-----------AGTCC-GAG-CA
GG--------------------GAGA------------AAGCC-AAG-CA
----------------------GGGG------------ACGGC-AAG-CG
AG--------------------GA--------------AAGTCAGAG-C-
AGG-------------------GAG-------------AAGCC-AAG-CA
GG--------------------GAGGGGGAAGG-----GAGCC-ACG-CA
GG--------------------GAGG------------AAGCC-AAG-CA
GGGGG-----------------GGGG------------AAGCC-AGA-CA
GGGGGGGG--------------GAGGGGGGGCGGAG--GAGCC-GAT-CA
GGGG------------------GAGG------------GAGCC-GAG-CT
----------------------GGCG------------AAGCC-GGG-CA
----------------------GTGTG-----------AGTCCAAAG-CA
----------------------GGGC------------AAGCC-AAG-CA
GG--------------------GAGC------------AGGGC-GAG-GC
GGG-------------------GAGG------------AAGCC-GAG-CA
GC--------------------ACGGA-----------TAGCG-AAG-CA
GC--------------------GCGG------------AAACC-CGG-CA
GC--------------------GCGG------------AAGCC-CGG-CA
GC--------------------GCGG------------AAGCC-CGG-CA
GC--------------------GCGG------------AAGCC-CGG-CA
--------------------------------------------------
--------------------------------------------------
--------------------------------------------------
--------------------------------------------------
----------------------GTG-------------AGTCCAAAG-CA
----------------------GAGG------------AGGCC-AAT-CA
G---------------------GCGG------------AAGCG-AAG-CG
--------------------------------------------------
--------------------------------------------------
AGA-------------GGGAGGGAGG------------GAGG--GAG-CA
GGCGTCTCAGGGGGGGGGGGCAGTGG------------GGGGC-AGG-CA
GAG-------------------GAGGG-----------AGGCC-AGG-CA
C---------------------GGGG------------AAGTA-AAG-AA
----------------------GAGG------------AAACC-AAG-AA
----------------------GAGG------------AAACC-AAG-AA
GGGGGGGGGGGGG---------GAAG------------AAGCC-AAG-CA
----------------------GTGG------------AAGCC-GAG-CA
----------------------GTGG------------AAGCC-GAG-CA
----------------------GTGG------------AAGCC-GAG-CA
----------------------GTGG------------AAGCC-GAG-CA
--------------------------------------------------
----------------------GGGC------------AAGTC-AAG-CA
----------------------GGGC------------AAGTC-AAG-CA
----------------------G-GG------------AGGTCACAG-C-
GTT-------------------GAA-------------AAGCC-G-G-CA
GTT-------------------GAA-------------AAGCC-G-G-CA
----------------------G-GG------------AGCCCCGGG-CA
----------------------GGGG------------GGTCA-GGA-CG
----------------------GGGG------------GGTCA-GGA-CG
----------------------GTGG------------AAGCC-CAG-CA
----------------------GTGG------------AAGCC-CAG-CA
----------------------GTGG------------AAGCC-CAG-CA
GTT-------------------GAA-------------AAGCC-GGG-CA
--------------------------------------------------
G---------------------GAAAG-----------AAGCC-AGG-CA
GTT-------------------GAA-------------AAGCC-G-G-CA
GTGGG-----------------GAG-------------AAGCC-AAG-CA
GTGGG-----------------GAG-------------AAGCC-AAG-CA
CTGGG-----------------GAG-------------AAGCC-GAG-CA
--------------------------------------------------
GGGAGGGA--------------GAGGGGGGGG------GCGTA-GGG-CA
GCGTGTGCGTGTGCGTGTGT------------------------------
GGGAGGGA--------------GAGGGGGGGG------GCGTA-GGG-CA
--------------------------------------------------
--------------------------------------------------
CTGGG-----------------GAG-------------AAGCC-GAAGCA
CTGGG-----------------GAG-------------AAGCC-GAAGCA
CTGGG-----------------GAG-------------AAGCC-GAG-CA
GGGAGGGA--------------GAGGGGGGGGGGGCGTAGGGCAGAG-CG
----------------------GTGA------------AAGGC-ATG-CA
--------------------------------------------------
----------------------GTAGA-----------AAGCC-AGG-CA
CTGG------------------GTGG------------ACGCT-GAG-CA
-----------------------TGG------------GGGCC-AGG-AA
CCGG------------------GAGG------------AAACC-GAG-TA
CTGG------------------GAGG------------AAGCC-GAG-CA
CTGG------------------GAGG------------AAGCC-GAG-CA
AT--------------------GAGG------------AGGCCAGAG-C-
CTGG------------------GAGG------------AAGCC-GAG-CA
AT--------------------GAGG------------AGGCCAGA-GC-
CTGG------------------GAGG------------AAGCC-GAG-CA
--------------------------------------------------
CTGG------------------GTGG------------ACGCT-GAG-CA
CTGG------------------GTGG------------ACGCT-GAG-CA
CTGG------------------GTGG------------ACGCC-GAG-CA
CTGG------------------GTGG------------ACGCC-GAG-CA
CTGG------------------GTGG------------ACGCC-GAG-CA
CTGG------------------GTGG------------ACGCC-GAG-CA
----------------------GAGG------------AAGTC-AGG-CA
CTGG------------------GTGG------------ACGCC-GAG-CA
G---------------------GACCA-----------ATGCC-AAG-CA
G---------------------GACCA-----------ATGCC-AAG-CA
----------------------GAGA------------GAGCC--AGTCT
G---------------------GAG-------------CCGCC-AGG-CA
G---------------------GAG-------------CCGCC-AGG-CA
GGG-------------------GAG-------------CCGCC-AGG-CA
GGG-------------------GAG-------------CCGCC-AGG-CA
G---------------------GAG-------------GAGTC-AAG-CA
G---------------------GAG-------------GAGTC-AAG-CA
G---------------------GAG-------------GAGTC-AAG-CA
G---------------------GAG-------------GAGTC-AAG-CA
G---------------------GAG-------------CCGCC-AGG-CA
G---------------------GAG-------------CCGCC-AGG-CA
G---------------------GTG-------------GAGTC-GAG-CA
--------------------------------------------------
--------------------------------------------------
CTGGGGGGGGGAGGGAG-----GAGG------------AGGAG-GAG-GA
GACGGCGAGGGAGGAGGAG---GAGG------------AGGCC-AGA-CA
----------------------GGGG------------AAGGG-GGG-AA
----------------------GAGG------------AAGTT-AAG-CG
----------------------TAGGG-----------AAGCC-AAG-CA
----------------------TAGGG-----------AAGCC-AAG-CA
----------------------TAGGG-----------AAGCC-AAG-CA
----------------------TAGGG-----------AAGCC-AAG-CA
GCT-------------------GGGG------------AGGCC-AAG-CA
GTT-------------------GGGG------------AGGCC-AAG-CA
GTT-------------------GGGG------------AGGCC-AAG-CA
--------------------------------------------------
G--------------------GGCGG------------ACGCC-AAG-CG
GACGGCGAGGGAGGAGGAGGAGGAGG------------AGGCC-AGA-CA
----------------------GGGG------------AAGCC-AAG-CA
----------------------GGGA------------AAGCCAACG-CA
GGGG------------------GCGGGGA---------GGGCCAGTG-TA
GGGG------------------GCGGGGA---------GGGCCAGTG-TA
TTGGG-----------------GTGG------------ACGCC-AAG-CA
TTGGG-----------------GTGG------------ACGCC-AAG-CA
GGG-------------------GTGA------------AAGCC-AAG-CA
----------------------CAGGG-----------AGGCCAGAG-CG
TTGGG-----------------GTGG------------ACGCC-AAG-CA
TTGGG-----------------GTGG------------ACGCC-AAG-CA
TTGGG-----------------GTGG------------ACGCC-AAG-CA
----------------------GGGG------------GAGCC-AAG-CA
CC--------------------GGGG------------AAGCC-TGG-C-
GC--------------------GGGA------------AAGCCAACG-CA
GG--------------------GGGG------------AAGCC-TGG-C-
GG--------------------GGCG------------AAGCC-AAG-CG
CC--------------------GGGG------------AAGCC-TGG-C-
GG--------------------GGGG------------AAGCC-TGG-C-
GG--------------------GGGG------------AAGCC-TGG-C-
GG--------------------GGGG------------AAGCC-TGG-C-
CC--------------------GGGG------------AAGCC-TGG-C-
----------------------GAAG------------GGGAC-AAG-CA
----------------------GAAG------------GGGAC-AAG-CA
----------------------GAAG------------GGGAC-AAG-CA
----------------------GAAG------------GGGAC-AAG-CA
--------------------------------------------------
GC--------------------GAGG------------AGGCC-AAG-CA
GC--------------------GAGG------------AGGCC-AAG-CA
GG--------------------GAGG------------AGGCC-AGG-AA
T---------------------G-GG------------AGGCC-GAG-CA
T---------------------G-GG------------AGGCC-GAG-CA
T---------------------G-GG------------AGGCC-GAG-CA
T---------------------G-GG------------AGGCC-GAG-CA
T---------------------G-GG------------AGGCC-GAG-CA
----------------------GAGCGA----------GAGCA-CAA-CC
----------------------GAGCGA----------GAGCA-CAA-CC
--------------------------------------------------
--------------------------------------------------
--------------------------------------------------
--------------------------------------------------
--------------------------------------------------
----------------------GGGG------------AGGCG-GAG-CG
----------------------GCGA------------AAGCC-GAG-GA
G---------------------GGGA------------AAGCC-AAG-CG
G---------------------GGGA------------AAGCC-AAG-CG
GGGG------------------GTGA------------GAGAC-AGG-CC
GGGG------------------GTGA------------GAGAC-AGG-CC
----------------------GGGA------------AAACC-AAG-CG
----------------------GGGA------------AAACC-AAG-CG
-----------------------TGGC-----------AATCC-AAA-GA
----------------------GGGG------------AAGCC-GAG-CA
----------------------GAGGAG----------AGTGT-AAGCAA
----------------------GGGG------------AGGCG-GAG-CG
----------------------GGGG------------AGGCG-GAG-CG
----------------------GGGG------------AGGCG-GAG-CG
----------------------GGGG------------AGGCG-GAG-CG
----------------------G-GG------------AGGCG-GAG-CG
----------------------GGGG------------AGGCG-GAG-CG
----------------------GGGG------------AGGCG-GAG-CG
T---------------------G-GG------------AAGCC-GAA-AG
--------------------------------------------------
G---------------------GAGG------------AAGCC-ACG-CA
G---------------------GAGG------------AAGCC-ACG-CA
G---------------------GAGG------------AAGCC-ACG-CA
----------------------GGGG------------AAGCC-AGT-CA
----------------------GTGGG-----------AAGCCAAAG-CT
----------------------GTGGG-----------AAGCCAAAG-CA
----------------------GTG-------------AAGCC-AGG-CA
--------------------------------------------------
G---------------------GGGGA-----------AGCCA-AAG-CT
GGGGGG----------------GGGG------------AACCA-AGG-CT
G---------------------GGGGA-----------AGCCA-AAG-CT
GGGGGG----------------GGGG------------AACCA-AGG-CT
GGGGGGG---------------GGGG------------AACCA-AGG-CA
--------------------------------------------------
GG--------------------GAGC------------AGGGC-GAGGC-
GGG-------------------GAGG------------AAGCC-GCG-CA
GGG-------------------GAGG------------AAGCC-GCG-CA
GGG-------------------GAGG------------AAGCC-GCG-CA
GGG-------------------GAGG------------AAGCC-GCG-CA
GTGG------------------GAGC------------AGGGC-GAGG--
----------------------GACGGG----------AGGCC-AAG-CA
GCG-------------------GCGGTG----------GGGTC-GGG-GA
--------------------------------------------------
--------------------------------------------------
----------------------G-GG------------AAGGCGGAG-CC
----------------------G-GG------------AAGGCGGAG-CG
----------------------G-GG------------AAGGCGGAG-CC
----------------------GAGG------------AGGCG-GAG-CG
----------------------GAGG------------AGGCG-GAG-CG
----------------------GAGG------------AGGCG-GAG-CG
----------------------GAGG------------AGGCG-GGG-CC
AT--------------------GGGG------------AAGCC-AAG-CA
GG--------------------GAGC------------AGGGC-GAGGC-
GG--------------------GAGC------------AGGGC-GAGGC-
GCGGG-----------------GAG-------------AAGTC-ACT-CG
GCGGG-----------------GAG-------------AAGTC-ACT-CG
--------------------------------------------------
--------------------------------------------------
--------------------------------------------------
--------------------------------------------------
--------------------------------------------------
CT--------------------CTGG------------GAAGC-AGG-CA
CTCTGG----------------GAAG------------CAGGC-AGG-CC
-----------------------------------------GCGTGA-CA
CT--------------------CTGG------------GAAGC-AGG-CA
CTCTGGG---------------GAGG------------AAGCT-CAG-CG
CTCTGGG---------------GAGG------------AAGCT-CAG-CG
A---------------------GAG-------------AAGTC-GAG-CA
A---------------------GAG-------------AAGTC-GAG-CA
G---------------------GAG-------------AAGTC-GAG-CA
--------------------------------------------------
--------------------------------------------------
AT--------------------GGGG------------AGGGC-CAG-CA
GC--------------------CAAG------------ACGC--CAG-GA
GC--------------------CAAG------------ACGC--CAG-GA
GG--------------------GAGG------------AGGCC-TAG-CA
GG--------------------GAGG------------AGGCC-CAG-CA
G---------------------GAG-------------AAGCC-GTG-CA
G---------------------GTGGG-----------AAGCC-CGG-CA
G---------------------GTGGG-----------AAGCC-CGG-CA
G---------------------GAG-------------AAGTC-GAG-CA
A---------------------GAG-------------AAGCC-GAG-CA
GG--------------------GAGA------------AAACC-AGG-CG
GG--------------------GAGA------------AAACC-AGG-CG
GG--------------------GAGA------------AAACC-AGG-CG
GG--------------------GAGA------------AAACC-AGG-CG
GG--------------------GAGA------------AAACC-AGG-CG
G---------------------GACGG-----------CGGCC-GAG-CA
G---------------------GACGG-----------CGGCC-GAG-CA
G---------------------GACGG-----------CGGCC-GAG-CA
G---------------------GACGG-----------CGGCC-GAG-CA
G---------------------GACGG-----------CGGCC-GAG-CA
----------------------GAGG------------AGGCC-AGG-CA
GG--------------------GAGA------------AAACC-AGG-CG
----------------------GAGG------------AGGCC-AGG-CA
----------------------GAGG------------AGGCC-AGG-CA
----------------------GAGG------------AGGCC-AGG-CA
----------------------GAGG------------AGGCC-AGG-CA
----------------------GAGG------------AGGCC-AGG-CA
----------------------GAGG------------AGGCC-AGG-CA
----------------------GAGG------------AGGTC-AGG-CA
----------------------GAGG------------AGGCC-AGG-CA
----------------------GAGG------------AGGCC-AGG-CA
GGG-------------------GAG-------------GAGAC-AGG-CA
GG--------------------GAGA------------AAACC-AGG-CG
----------------------GAGGCG----------AACCC-AAG-CA
----------------------GAGGCG----------AAGCC-AAG-CA
----------------------GAGGCG----------AAGCC-AAG-CA
GG--------------------GTGGGG----------ACGCCACAG-CA
GG--------------------GTGGGA----------AATCC-AAT-GC
G---------------------GAGG------------ACGCCACAG-CA
GGGTG-----------------GAGG------------ACGCCACA-GCA
GGGTG-----------------GAGG------------ACGCCACA-GCA
GGGTG-----------------GAGG------------ACGCCACA-GCA
GGGTG-----------------GAGG------------ACGCCACA-GCA
GGGTG-----------------GAGG------------ACGCCACA-GCA
CT--------------------GGGG------------TAGCC-AAG-CA
----------------------GTG-------------AAGTT-CAG-CA
G---------------------CACGA-----------CAGCC-AAC-CA
G---------------------CACGA-----------CAGCC-AAC-CA
GGGGGG----------------GGGG------------AGGCC-CAG-CA
GGGGGG----------------GGGG------------AGGTC-CAG-CA
GGGGGG----------------GGGG------------AGGCC-CAG-CA
GGGTG-----------------GAGG------------ACGCCACAG-CA
----------------------GAGG------------AAGCC-AGG-CT
----------------------GAGG------------AAGCC-AGG-CT
----------------------GCA-------------AGGCC-GAG-AA
GC--------------------GGGG------------AAGCC-AGA-CA
----------------------GCA-------------AGGCC-GAG-AA
GC--------------------GGGG------------AAGCC-AGA-CA
G---------------------CAGGC-----------AAGCC-AAG-CA
G---------------------CAGGC-----------GAGCC-AAG-CA
G---------------------CAGGC-----------AAGCC-AAG-CA
G---------------------CAGGC-----------AAGCC-AAG-CA
G---------------------GAAAG-----------AAGCC-AGG-CA
----------------------GCGG------------AAGCC-AAG-CA
----------------------GGGG------------AAGCA-AAG-CA
----------------------G-GGA-----------AGGCC-GAG-CA
----------------------G-GGA-----------AGGCC-GAG-CA
----------------------G-GGA-----------AGGCC-GAG-CA
----------------------G-GGA-----------AGGCC-GAG-CA
----------------------GGGG------------CAGCT-GAG-TA
----------------------GGGG------------CAGCT-GAG-TA
--------------------------------------------------
--------------------------------------------------
--------------------------------------------------
--------------------------------------------------
--------------------------------------------------
----------------------GGGG------------GAGCA-GAG-AA
----------------------GGGG------------GAGCA-GAG-AA
----------------------GGGG------------GGGCA-GGG-AA
G---------------------GGGG------------GGGCA-GGG-AA
----------------------GGGG------------GAGCA-GAG-AA
----------------------GGGG------------GAGCA-GAG-AA
----------------------GTCGG-----------AACGCCAAG-CA
----------------------GTCGG-----------AACGCCAAG-CA
----------------------GTCGG-----------AACGCCAAG-CA
----------------------GTCGG-----------AACGCCAAG-CA
GG--------------------GAG-------------AAGCC-AAG-CA
----------------------GGGG------------AAGTCAGAG-CA
G---------------------GTGG-------------AGTCGGTG-CA
----------------------GGCA------------AAGCC-GTG-AA
GG--------------------GCAG------------AAGCC-AAG-CA
----------------------GAGG------------AAGCC-GAG-CA
----------------------GAGG------------AAGCC-AAG-CA
G---------------------GAG-------------AAGCC-AGG-CA
G---------------------GAG-------------AAGCC-AGG-CA
----------------------GGGA------------AAGCC-AGG-CA
G---------------------GTG-------------AAGCC-AAG-CA
G---------------------GTG-------------AAGCC-AAG-CA
G---------------------GTG-------------AAGCC-AAG-CA
----------------------GAGG------------AAGCC-AAG-CA
G---------------------GTG-------------AAGCC-AAG-CA
G---------------------GTG-------------AAGCC-AAG-CA
----------------------GTGGG-----------AAGCC-AAG-CA
----------------------GGGG------------AAGCC-AAG-CG
CT--------------------GGGG------------AGGCC-AAC-CA
----------------------CAAGCGGA--------GGACC-AGG-CA
----------------------GTGGGA----------GAGCC-GGG-CA
----------------------GTGGGA----------GAGCC-GGG-CA
----------------------GTGGGA----------GGGCC-GGG-CA
CTG-------------------GGGA------------AAGCC-GGG-CA
GAGG------------------GAGG------------CAGCC-CAG-CA
GAGG------------------GAGG------------CAGCC-CAG-CA
GAGG------------------GAGG------------CAGCC-CAG-CA
GAGG------------------GAGG------------CAGCC-CAG-CA
GAGG------------------GAGG------------CAGCC-CAG-CA
GAGG------------------GAGG------------CAGCC-CAG-CA
GAGG------------------GAGG------------CAGCC-CAG-CA
G---------------------GA--------------GAGCC-GCG-AA
----------------------GA--------------AACGC-CGG-AA
----------------------G-GGA-----------GAGCC-GGG-CG
----------------------G-GGA-----------GAGCC-GGG-CA
----------------------GAGGGAGG--------CAGCC-CAG-CA
----------------------GAGGGAGG--------CAGCC-CAG-CA
----------------------GAGG------------GAGCC-CAG-CA
----------------------GAGG------------GAGCC-CAG-CA
----------------------ATGG------------AAGCC-AGG-GT
--------------------------------------------------
----------------------GGGA------------AAGCC-GGG-CG
--------------------------------------------------
--------------------------------------------------
--------------------------------------------------
--------------------------------------------------
CA--------------------AAGG------------AAAAA-AGG-TA
----------------------GATA------------AAGCC-AAG-CA
----------------------GCGG------------AGGCC-GCG-CA
----------------------GCGG------------AGGCC-GCG-CA
----------------------GCGG------------AGGCC-GCG-CA
----------------------GGGG------------GAGCC-CAG-CA
----------------------GGGG------------GAGCC-CAG-CA
----------------------GGGG------------GAGCC-CAG-CA
CG--------------------GGGG------------AAGCC-CAG-CA
----------------------GTAGA-----------AAGCC-AGG-CA
A---------------------GTGGA-----------ATGCG-AAG-GA
CT--------------------GGGG------------AAGCC-AAG-CA
G---------------------GAG-------------AAGCC-AGA-CG
----------------------GAGG------------AAACC-AAG-CA
----------------------GAGG------------AAACC-AAG-CA
----------------------GAGG------------AAACC-AAG-CA
----------------------GAGG------------AAACC-AAG-CA
G---------------------GAG-------------AAGCC-AGA-CG
--------------------------------------------------
C---------------------GAGTC-----------AAGA--AGC-CC
----------------------GAGG------------AGGCC-AGG-CA
----------------------GAGG------------AGGCC-CGG-CT
GC--------------------GGGG------------AGGCC-CGG-CT
----------------------GGGG------------AAGCC-ATG-CG
--------------------------------------------------
--------------------------------------------------
--------------------------------------------------
--------------------------------------------------
--------------------------------------------------
GGGA------------------GAGGGG----------GAGCT-CGT-GA
--------------------------------------------------
--------------------------------------------------
GGG-------------------GAG-------------ATTCC-AGG-CG
GGG-------------------GAG-------------ATTCC-AGG-CG
GGGG------------------GTGGT-----------GGGCC-GCG-GT
----------------------GAGG------------AAGCC-GGG-CA
GGGGGGG---------------GTGGT-----------GGGCC-GCG-GT
AAT-------------------GGGGT-----------AACCA-GAG-CA
----------------------GGGG------------GGGCA-TAC-AG
----------------------GGGG------------GGGCA-TAC-AG
----------------------GGGG------------AAGCC-ATG-CG
----------------------GGGG------------AAGCC-ATG-CG
----------------------GGGG------------CAGCC-CCA-CA
----------------------GGGG------------CAGCC-CCA-CA
----------------------GGGG------------AAGCC-GCG-CA
GG--------------------GGGG------------AAGCC-GCG-CA
GG--------------------GGGG------------AAGCC-GCG-CA
----------------------GGGG------------AAGCC-GCG-CA
GG--------------------GGGG------------AAGCC-GCG-CA
GG--------------------GGGG------------AAGCC-GCG-CA
GGGGGGG---------------GGGG------------AAGCC-GCG-CA
--------------------------------------------------
----------------------GGGG------------AAGCC-GCG-CA
G---------------------GAG-------------AAGTC-AGG-CA
GG--------------------GAAG------------AAGCC-AAG-CA
GG--------------------GAAG------------AAGCC-AAG-CA
G---------------------GTTG------------AAGCC-GAC-CA
GG--------------------GCGG------------AAGCC-AAG-CA
GG--------------------GCGG------------AAGCC-AAG-CA
GG--------------------GCGG------------AAGCC-AAG-CA
GG--------------------GCGG------------AAGCC-AAG-CA
GGG-------------------GGGG------------GAGCC-TAG-CG
GGGGGG----------------GGGG------------GAGCC-TAG-CG
--------------------------------------------------
--------------------------------------------------
-----------------------ATT------------GGACC-CAG-CA
GCGG------------------GAGG------------AAGCC-GAG-CA
GGGGGGGG--------------GGGG------------TAGCC-AAG-CC
----------------------GGGG------------AGGCC-GAG-CA
----------------------GGGG------------AGGCC-GAG-CA
----------------------GGGG------------AGGCC-GAG-CA
----------------------GGGG------------AGGCC-GAG-CA
----------------------GGGG------------AGGCC-GAG-CA
----------------------GGGG------------AGGCC-GAG-CA
----------------------GGGG------------AAGCC-GGG-CA
----------------------GAGG------------AAGCC-AAG-CA
----------------------GAGG------------AAGCC-AAG-CA
AG--------------------GAGG------------AAGCT-GAG-AA
GG--------------------GAGG------------AAGCC-GAG-AA
GG--------------------GAGG------------AAGCC-GAG-AA
GAGG------------------GAGG------------AAGCCAACG-CA
AT--------------------GGGG------------AAGGC-GAG-CA
AT--------------------GGGG------------AAGCC-GAG-CA
AT--------------------GGGG------------AAGCC-GAG-CA
AT--------------------GGGG------------AAGCC-GAG-CA
GG--------------------GAGG------------AAGCC-AAG-CA
----------------------GGGG------------AAGCC-AGG-CT
----------------------GGGG------------AGGCC-AAG-CA
----------------------GGGG------------AGGCC-AAG-CA
GG--------------------GAGG------------AAGCC-AAG-CA
GG--------------------GAGG------------AAGCC-AAG-CA
GG--------------------GAGG------------AAGCC-AAG-CA
-----------------------AGG------------AAGCC-AGA-CA
GG--------------------GAAA------------AAGCC-AGA-CA
----------------------ACGG------------AAGCC-AGG-CA
G---------------------GGGG------------AAGCC-AGG-CT
----------------------CTGG------------AATGC-AAG-CG
----------------------GGGG------------AGGCC-AAG-TA
----------------------GGGG------------GAGCC-AAG-CA
----------------------GGGG------------GAGCC-AAG-CA
----------------------CAA-------------AAGCC-AAG-AC
G---------------------GGGG------------AAGCC-AGG-CT
G---------------------GGGG------------AAGCC-AGG-CT
----------------------GAA-------------AAGGA-CAG-AA
----------------------GGGG------------AAGCC-AGG-CT
--------------------------------------------------
---------------------GTGGCG-----------AAGCC-GGG-CA
---------------------GTGGCG-----------AAGCC-GGG-CA
---------------------GTGGCG-----------AAGCC-GGG-CA
---------------------GTGGCG-----------AAGCC-GGG-CA
CT--------------------GGGG------------AAGCC-GAG-TA
CG--------------------GGGG------------AGGCC-GGG-CA
TG--------------------GGGG------------AGGCC-AAC-CA
CG--------------------GGGG------------AGGCC-AGG-CA
CG--------------------GGGG------------AGGCC-AGG-CA
CG--------------------GGGG------------AGGCC-AGG-CA
----------------------GTCG------------AGGCC-AAA-CA
GCGG------------------GAGG------------AAGCC-GAT-GA
--------------------------------------------------
----------------------GGGA------------AAGCC-GAG-CA
CT--------------------GGGG------------AAGCC-AGG-AA
----------------------GTCG------------AGGCC-AAA-CA
----------------------GTCG------------AGGCC-AAA-CA
----------------------GCGGGAG---------AAGCC-AGT-GA
----------------------GCGGGAG---------AAGCC-AGT-GA
----------------------GCGGGAG---------AAGCC-AGT-GA
----------------------GCGGGAG---------AAGCC-AGT-GA
----------------------GCGGGAG---------AAGCC-AGT-GA
GCGG------------------GAGG------------AAGCC-GAT-GA
GCGG------------------GAGG------------AAGCC-GAT-GA
GCGG------------------GAGG------------AAGCC-GAT-GA
----------------------GCGGGGCG--------AAGCC-GCG-CA
G---------------------GTGGCG----------AAGCC-GAG-CA
G---------------------GTGGGA----------AGGCC-GAG-CA
G---------------------GTGGGG----------AAGCC-GAG-CA
G---------------------GTGGGG----------AAGCC-GAG-CA
G---------------------GTGGGG----------AAGCC-GAG-CA
G---------------------GTGGGG----------AAGCC-GAG-CA
C---------------------GAGG------------AATCT-AAG-AA
CT--------------------GGGG------------AAGCC-GAG-TA
CT--------------------GGGG------------AAGCC-GAG-TA
----------------------GGGG------------AGGCC-AGG-TG
GC--------------------GGGG------------AAGCC-AAG-CA
G---------------------GCGA------------AAGTC-AGG-CA
G---------------------GCGA------------AAGTC-AGG-CA
G---------------------GCGA------------AAGTC-AGG-CA
G---------------------GCGA------------AAGTC-AGG-CA
TT--------------------G-GGA-----------AAGCG-ATC-CA
TT--------------------G-GGA-----------AAGCG-ATC-CA
TT--------------------G-GGA-----------AAGCG-ATC-CA
TT--------------------G-GGA-----------AAGCG-ATC-CA
TT--------------------G-GGA-----------AAGCG-ATC-CA
TT--------------------G-GGA-----------AAGCG-ATC-CA
TT--------------------G-GGA-----------AAGCG-ATC-CA
TT--------------------G-GGA-----------AAGCG-ATC-CA
TT--------------------G-GGA-----------AAGCG-ATC-CA
GC--------------------GGGG------------AAGCC-AAG-CA
----------------------GGGG------------AAGCT-AAG-CA
----------------------GGGG------------AAGCT-AAG-CA
G---------------------GCGA------------AAGTC-AGG-CA
--------------------------------------------------
----------------------GCG-------------AGTCC-GGG-CA
----------------------GCG-------------AGTCC-GGG-CA
----------------------GCG-------------AGTCC-GGG-CA
----------------------GCG-------------AGTCC-GGG-CA
----------------------GCG-------------AGTCC-GGG-CA
----------------------GGGG------------AAGCC-AGG-CG
----------------------GGGG------------AAGCC-AGG-CG
----------------------GCG-------------AGTCC-GGG-CA
----------------------GCG-------------AGTCC-GGG-CA
----------------------GCG-------------AGTCC-AGG-CG
----------------------GCG-------------AGTCC-GGG-CA
----------------------GCG-------------AGTCC-AGG-CG
----------------------ATGG------------AAGCT-AAG-CA
GCGTATGGGGGGGGG-------GGGGA-----------GAGTC-AAG-CA
----------------------GAGG------------AAGCC-AAG-CC
----------------------GAGG------------AAGCC-AAG-CC
---------------------------------------AGCG-GTT-GC
----------------------AGGG------------AAGCC-AAG-CA
--------------------------------------------------
GG--------------------GTGGG-----------GGTTT-GAG-CA
----------------------GAGG------------AAGCC-AAG-CA
G---------------------CACGGA----------TAGCG-AAG-CA
----------------------GGGG------------AAGCC-AAG-CA
GGAG------------------GAGGGGGCGGCGG---AAGCC-AGG-CA
GGAG------------------GAGGGGGCGGTGG---AAGCC-AGG-CA
GGAG------------------GAGGGGGCGGTGG---AAGCC-AGG-CA
----------------------TAGGGCAG--------AAACA-ACG-CA
----------------------TAGGGCAG--------AAACA-ACG-CA
----------------------TAGGGCAG--------AAACA-ACG-CA
G---------------------CACGGA----------TAGCG-AAG-CA
--------------------------------------------------
G---------------------CACGGA----------TAGCG-AAG-CA
G---------------------CACGGA----------TAGCG-AAG-CA
G---------------------CACGGA----------TAGCG-AAG-CA
----------------------GTGGGTGTGGG-----GTGCC-AGA-C-
----------------------GTGGGTGTGGG-----GTGCC-AGA-C-
CT--------------------GGGG------------AAGCC-AGG-CA
CT--------------------GGGG------------AAGCC-AGG-CA
----------------------GTCG------------AATCC-GAG-CA
----------------------GGAG------------AAGCC-GCG-CC
----------------------GGAG------------AAGCC-GCG-CC
----------------------GGAG------------AAGCC-GCG-CC
----------------------GGGG------------AAGCC-AAG-CA
----------------------GGGG------------AAGCC-AAG-CA
----------------------GGGG------------AAGCC-AAG-CA
----------------------GGGG------------AAGCC-AAG-CA
----------------------GGGG------------AAGCC-AAG-CA
GG--------------------GAGG------------AGGCC-AGG-CA
G---------------------GAG-------------AAGCT-AAG-CA
----------------------GGGG------------AAGCT-ACG-CA
CT--------------------GCGGG-----------GAGGCCGGGGCA
----------------------GAGG------------AAGCC-AAG-CA
GA--------------------GAGG------------AAGGC-AAT-CA
GA--------------------GAGG------------AAGGC-AAT-CA
GA--------------------GAGG------------AAGGC-AAT-CA
GG--------------------GGGG------------AAGGC-AAT-CA
GA--------------------GAGG------------AAGGC-AAT-CA
GA--------------------GAGG------------AAGGC-AAT-CA
AT--------------------GTGG------------AAGGC-AAT-CA
----------------------GGGG------------AAGCT-AAG-CA
----------------------GGGG------------AAGCT-AAG-CA
CT--------------------GCTG------------AAGCC-AAG-TA
----------------------GGGG------------AAGCT-AAG-CA
----------------------GGGG------------AAGCT-ACG-CA
----------------------GGGG------------AAGCT-ACG-CA
----------------------GGGG------------AAGCT-ACG-CA
----------------------GGGG------------AAGCT-ACG-CA
----------------------GGGG------------AAGCT-ACG-CA
----------------------GGGG------------AAGCC-AAG-CA
----------------------GGGG------------AAGCC-AAG-CA
----------------------GGGG------------AAGCC-AAG-CA
----------------------GGGG------------AAGCC-AAG-CA
----------------------GGGG------------AAGCC-AAG-CA
GG--------------------GAGA------------AAGCC-AAG-CA
GG--------------------GAGA------------AAGCC-AAG-CA
----------------------GGGG------------AGGCC-GGG-CA
--------------------------------------------------
--------------------------------------------------
GG--------------------GACGG-----------AAGCC-AAG-CA
----------------------GGGG------------AAGCT-AAG-CA
----------------------GGGG------------AAGCT-AAG-CA
----------------------CAGGG-----------AGGCC-AGG-CA
----------------------CAGGG-----------AGGCC-AGG-CA
----------------------CAGGG-----------AGGCC-AGG-CA
----------------------GGGG------------AAGCC-AAG-CA
----------------------GGGG------------AAGCC-AAG-CA
G---------------------GAG-------------AAGCC-AAG-CA
G---------------------GGG-------------AAGCC-AAG-CA
G---------------------GGG-------------AAGCC-AAG-CA
GG--------------------GAG-------------AGGCC-CAG-CA
GG--------------------GAG-------------AGGCC-CAG-CA
GG--------------------GAG-------------AGGCC-CAG-CA
----------------------GCGC------------AAGCC-ACG-CA
----------------------GGGGCG----------AAGCC-GAG-CA
C---------------------G-GG------------AAGCC-AGG-CA
C---------------------G-GG------------AAGCC-AGG-CA
C---------------------G-GG------------AAGCC-AGG-CA
C---------------------G-GG------------AAGCC-AGG-CA
C---------------------G-GG------------AAGCC-AGG-CA
C---------------------G-GG------------AAGCC-AGG-CA
C---------------------G-GG------------AAGCC-AGG-CA
C---------------------G-GG------------AAGCC-AGG-CA
G---------------------GAGGAG----------AAGTC-GAG-CC
G---------------------GAGGAG----------AAGTC-GAG-CC
G---------------------GAGGAG----------AAGTC-GAG-CC
----------------------GTGGA-----------GGCCC-AGA-CA
----------------------G-GGT-----------GACCC-AGG-CA
----------------------G-GGT-----------GACCC-AGG-CA
--------------------------------------------------
GG--------------------GACG------------AAGCC-GAG-CA
----------------------GGGGCG----------AAGCC-GAG-CA
----------------------GGGGCG----------AAGCC-GAG-CA
C---------------------G-GG------------AAGCC-AGG-CA
GG--------------------GAGAG-----------AAGCC-AGG-GA
GGA-------------------CAGG------------AAGCC-AGG-CG
GGA-------------------CAGG------------AAGCC-AGG-CG
GGA-------------------CAGG------------AAGCC-AGG-CG
G---------------------GAGGAG----------AAGTC-GAG-CC
G---------------------GAGGAG----------AAGTC-GAG-CC
G---------------------GAGGAG----------AAGTC-GAG-CC
G---------------------GAGGAG----------AAGTC-GAG-CC
----------------------GAGG------------AAGCC-GAG-CA
----------------------GCGGGA----------AAGCC-AAG-CA
--------------------------------------------------
----------------------GAGG------------AGGCC-AGG-CG
----------------------GCGG------------AAGCC-ACG-CA
----------------------GCGG------------AAGCC-ACG-CA
----------------------GCGG------------AAGCC-ACG-CA
----------------------GCGG------------AAGCC-ACG-CA
----------------------GCGC------------AAGCC-ACG-CA
----------------------GCGC------------AAGCC-ACG-CA
----------------------GAGG------------AAGCC-CAG-CA
----------------------GAGG------------AAGCC-GAG-CA
----------------------GAGG------------AAGCC-GAG-CA
-----------------------------------------CC-AAG-CA
-----------------------------------------CC-GAG-AA
-----------------------------------------CC-AAG-CA
-----------------------------------------CC-AAG-CA
-----------------------------------------CC-AAG-CA
GG--------------------GAGG------------GGACC-AGG-CA
GG--------------------GAGG------------GGACC-AGG-CA
GG--------------------GAGG------------GGACC-AGG-CA
GG--------------------GAGA------------AGGTC-AAG-CA
GG--------------------GAGG------------AAGCC-AAG-CA
GG--------------------GAGG------------AAGCC-AAG-CA
GGGG------------------GAG-------------GAGCC-GAG-CC
GGGG------------------GAG-------------GAGCC-GAG-CT
----------------------GTGG------------ACGCC-AAG-TA
--------------------------------------------------
----------------------GAAG------------ACGCC-CAG-CA
----------------------GAGCCAGGG-------GGGTC-AAC-CA
CTAGG-----------------GTAG------------AAGCC-AAG-CA
GGG-------------------GAGC------------GAGCC-AGG-CA
GGG-------------------GAGC------------GAGCC-AGG-CA
GGG-------------------GAGC------------GAGCC-AGG-CA
----------------------GGGG------------AGGCC-AGT-TA
----------------------GGGG------------AGGCC-AGT-TA
GG--------------------GCGG------------AAGCC-AAA-GC
GG--------------------GCGG------------AAGCC-AAG-CA
GA--------------------GAGG------------AGGCC-CAG-CA
GG--------------------GAGG------------AGGCC-CAG-CA
GG--------------------GAGG------------AGGCC-CAG-CA
G---------------------TAAG------------AAGCC-ACG-CA
----------------------GGGG------------CGGCC-AAG-CA
G---------------------GCGGG-----------GAGCC-AAG-CA
GGC-------------------GAG-------------GAGCC-AAG-CA
----------------------GTCGG-----------CAGCC-CAG-CA
CT--------------------TATG------------AGGCC-AGA-CA
----------------------GAGGG-----------GGCTTCAAG-CA
CC--------------------CATG------------ACGCC-AGG-CA
GGGAGG----------------GAGG------------GGGCC-CAG-CA
--------------------------------------------------
--------------------------------------------------
--------------------------------------------------
----------------------GGGA------------AAGAC-AGG-CA
GA--------------------GAGG------------GAGCC-GAG-CA
GA--------------------GAGG------------GAGCC-GAG-CA
GA--------------------GAGG------------GAGCC-GAG-CA
GG--------------------GAGG------------AAGCC-AAG-CA
GG--------------------GCGG------------AAGCC-AAG-CA
GG--------------------GCGG------------AAGCC-AAG-CA
----------------------GAGG------------AAGCC-GAG-CG
GGGG------------------GAGG------------GAGCC-GAG-CT
----------------------TTGG------------AAGCC-GAG-CC
----------------------TTGG------------AAGCC-GAG-CC
----------------------GTGG------------ACGCC-AAG-TA
----------------------GGGA------------AAGCC-ACG-TA
----------------------GGGA------------AAGCC-ACG-TA
----------------------GGGA------------AAGCC-ACG-TA
----------------------GGGG------------AAGCC-ACT-AA
----------------------GGGG------------CGGCC-AAG-CA
----------------------GGGG------------CGGCC-AAG-CA
----------------------CGGG------------CAGCC-CAG-CA
----------------------CGGG------------CAGCC-CAG-CA
----------------------GGGG------------AAGCC-AAG-CA
TCTG------------------GAA-------------AAGCC-AGG-CA
TCTG------------------GAA-------------AAGCC-AGG-CA
TCTG------------------GAA-------------AAGCC-AGG-CA
----------------------GGGG------------AAGCC-CAG-CA
----------------------GGGG------------AAGCC-CAG-CA
GGG-------------------GAGGGGTGGAGGGG--GAGCC-GGG-AG
GG--------------------GA--------------AAGCCCACC-CA
G---------------------GAG-------------AAGCC-AAG-CA
G---------------------GAG-------------AAGCC-AAG-CA
----------------------GGGG------------GGACC-AGG-CA
----------------------GTGG------------GGACC-AGG-CA
----------------------GTGG------------GGACC-AGG-CA
GGGG------------------GAG-------------AAGCC-AAG-CA
GGGG------------------GAG-------------AAGCC-AAG-CA
----------------------GGGG------------AAGCC-CAG-CA
TA--------------------GGGG------------AAGCC-CAG-CA
ATG-------------------GAG-------------AAGCC-GGG-CA
----------------------GTGG------------ACGCC-GAG-CA
----------------------GTGGTG----------AAGCC-AGG-CA
----------------------GTGGTG----------AAGCC-AGG-CA
----------------------GTGGTG----------AAGCC-AGG-CA
----------------------GTGGTG----------AAGCC-AGG-CA
----------------------GAGGGG----------GAGCC-AGG-CA
----------------------GAGGGG----------GAGCC-AGG-CA
T---------------------G-GG------------AAGCT-AAG-CC
T---------------------G-GG------------AAGCT-AAG-CC
--------------------------------------------------
G---------------------GAAAG-----------AAGCC-AGG-CA
----------------------GGCA------------AAGCC-AAG-CC
----------------------GGCA------------AAGCC-GAG-CC
G---------------------GAG-------------AGGCC-GGG-AG
G---------------------GAG-------------AGGCC-GGG-AG
G---------------------GAG-------------AGGCC-GGG-AG
G---------------------GAG-------------AGGCC-GGG-AG
G---------------------GTG-------------AAGCC-GGG-CA
G---------------------GTG-------------AAGCC-GGG-CA
GGG-------------------GAG-------------AAGCC-AAG-CA
----------------------TAGGGG----------AAGCC-CAG-CA
----------------------CGGA------------AAAAC-AGA-CA
----------------------AAGG------------AAGCCAAAG-CC
GG--------------------GCGG------------GAGCCAAAG-CC
GG--------------------GCGG------------GAGCCAAAG-CC
GG--------------------GCGG------------GAGCCAAAG-CC
G---------------------GCG-------------AAGCC-AGT-CA
GGGGAAGC--------------GAGG------------GGGGC-AGG-CA
GGGGAAGC--------------GAGG------------GGGGC-AGG-CA
----------------------GTGGAG----------ACGCC-AAG-CA
----------------------GGGG------------AGGCC-TGG-CG
----------------------GGGG------------AGGCC-TGG-CG
----------------------GGGG------------AAGCC-CAG-CA
A---------------------GTAGA-----------AAGAC-CAG-CA
----------------------GTGG------------AAGCG-GGG-CA
----------------------GGGG------------AAGCC-GAG-CA
----------------------GGCA------------AAGCC-AGG-CA
----------------------GGCA------------AAGCC-AGG-CA
----------------------GCGT------------AGGCC-ATG-CA
----------------------GCGT------------AGGCC-ATG-CA
----------------------GCGT------------AGGCC-ATG-CA
GG--------------------GAAG------------AGGCC-CGG-CA
GGGGGG----------------GGGG------------AA----------
----------------------GAGG------------AACTCACAC-CA
CGGG------------------GAGGGGGGGGG-----AAGCC-AAG-CA
----------------------GCGG------------AAGCG-GGG-CA
----------------------GTGG------------AAGCG-GGG-CA
----------------------GTGG------------AAGCG-GGG-CA
----------------------GCGG------------AAGCG-GGG-CA
----------------------GTGG------------AAGCG-GGG-CA
----------------------GTGG------------AAGCG-GGG-CA
GA--------------------GAGG------------AAGCC-AGG-CA
----------------------CGGG------------AAGCC-CTG-TA
GG--------------------TAAG------------AAGCC-AAG-CA
GCAGG-----------------GAG-------------GATCC-AGG-CA
GCGGGG----------------GAG-------------AAGCC-AGG-CA
----------------------AAGA------------ATGCC-AAG-CA
----------------------GAGG------------ACGCC-AAG-CA
CGGG------------------GAGGGGGGGGGG----AAGCC-AAG-CA
CGGG------------------GAGGGGGGGGGG----AGGCC-AAG-CA
CGGG------------------GAGGGGGGGGG-----AGGCC-AAG-CA
CGGG------------------GAGGGGGGGGG-----AAGCC-AAG-CA
----------------------GA--------------AGAAC-AAG-GA
GA--------------------GAGG------------AAGCC-AGG-CA
GA--------------------GAGG------------AAGCC-AGG-CA
GA--------------------GAGG------------AAGCC-AGG-CA
GA--------------------GAGG------------AAGCC-AGG-CA
GG--------------------GAGG------------AAGCC-GGT-CC
GG--------------------GAA-------------AAGCC-AGG-CC
G---------------------GAG-------------AAGCC-AGG-CC
GCGGGG----------------GAG-------------AAGCC-AGG-CA
GCGGGG----------------GAG-------------AAGCC-AGG-CA
GCGGGG----------------GAG-------------AAGCC-AGG-CA
GCGGGG----------------GAG-------------AAGCC-AGG-CA
GCGGGG----------------GAG-------------AAGCC-AGG-CA
G---------------------CAGGGAG---------GATCC-AGG-CA
----------------------GGGG------------AAGCC-ATG-CA
----------------------GGGG------------AAGCC-ATG-CA
----------------------GGGG------------AAGCC-ATG-CA
GA--------------------GAGG------------AAGTC-AGG-CA
GG--------------------GCGG------------AGGCC-CAG-CA
GG--------------------GCGG------------AGGCC-CAG-CA
GGG-------------------GGGG------------AATTC-AGG-CA
----------------------GGGG------------GGGA--ATT-CA
GCGGGG----------------GAG-------------AAGCC-AGG-CA
G---------------------TAGGG-----------AAGCC-AAG-CA
--------------------------------------------------
----------------------GGGG------------AAACC-GGG-CA
----------------------G-GGT-----------TAGTC-AGC-CA
G---------------------G-GGT-----------GCGGC-AAG-CA
GGGG------------------GACG------------AAGCC-AAG-CA
----------------------GGCA------------GGGCC-AAG-CA
CAAAT-----------------GCTG-------------AGCC-ACTTCA
A---------------------G-GG------------AAGCT-AGG-CA
A---------------------G-GG------------AAGCT-AGG-CA
A---------------------G-GG------------AAGCT-AGG-CA
A---------------------G-GG------------AAGCT-AGG-CA
----------------------GAGGC-----------AACCC-GAG-CA
AGCGGCATT-------------GA--------------AGGCC-GAG-CG
GC--------------------GTGGAG----------AAGCC-GAG-CA
GC--------------------GTGGAG----------AAGCC-GAG-CA
GC--------------------GTGGTG----------AAGCC-GAG-CA
GC--------------------GTGGAG----------AAGCC-GAG-CA
GC--------------------GTGGTG----------AAGCC-GAG-CA
GC--------------------GTGGTG----------AAGCC-GAG-CA
--------------------------------------------------
----------------------GAG-------------AGGTC-AGA-GC
--------------------------------------------------
----------------------GGGG------------ACGCC-AAG-CA
----------------------G-GTT-----------AAGCC-CAG-CA
G---------------------GTGGGC----------AAGCC-AAG-CA
GGG-------------------GAG-------------AAGCC-GAG-CG
GGG-------------------GAG-------------AAGCC-GAG-CG
GGG-------------------GAG-------------AAGCC-GAG-CG
GGGGGG----------------GAGGGGGGGCGGAG--GAGCC-GAT-CA
GGGGGGGGG-------------GAGGGGGGGCGGAG--GAGCC-GAT-CA
GGGGGGGGGGG-----------GAGGGGGGGCGGAG--GAGCC-GAT-CA
G---------------------G-GGA-----------AATCC-TGG-CA
G---------------------G-GGA-----------AATCC-TGG-CA
--------------------------------------------------
----------------------GAGAG-----------ACGCT-AAG-CA
----------------------GTGGGGAG--------GAGCC-GGG-CA
----------------------GTGGGGAG--------GAGCT-GAG-CA
A---------------------G-GG------------AAGCT-AGG-CA
ATTT------------------G-GG------------GAGCC-GAG-CA
GC--------------------GTGGAG----------AAGCC-GAG-CA
----------------------GGGGA-----------GGTCC-GAG-CG
----------------------GTAGGG----------AAGCC-AAG-CA
GC--------------------GTGGGG----------AAGCC-AAG-CC
GC--------------------GTGGGG----------AAGCC-AAG-CC
GC--------------------GTGGGG----------AAGCC-AAG-CC
--------------------------------------------------
----------------------G-GTT-----------AAGCC-CAG-CA
GGG-------------------GAG-------------AAGCC-GAG-CG
----------------------GACC------------AA-CCAGAG--A
----------------------GTGGGGAG--------GAGCG-AAG-CA
----------------------GTGGGGAG--------GAGCG-AAG-CA
----------------------GTGGGGAG--------GAGCG-AAG-CA
----------------------GTGGGGAG--------GAGCG-AAG-CA
----------------------GTGGGGAG--------GAGCG-AAG-CA
----------------------GTGGGAA---------GAGCC-AAG-CG
GGGGGGGGG-------------GAGGCG----------AGGGC-AAG--A
GGGGGGG---------------GAGGCG----------AGGGC-AAG--A
----------------------GTGGGGAG--------GAGCT-GAG-CA
----------------------GTGGGGAG--------GAGCT-GAG-CA
--------------------------------------------------
----------------------GTGGAG----------ACGCC-AAG-CA
----------------------GAGG------------AAGCC-AAG-C-
--------------------------------------------------
----------------------GGGG------------AAGCC-AAG-CA
----------------------GGGG------------AAGCC-AAG-CA
----------------------GGGG------------AAGCC-AAG-CA
----------------------GTAG------------AAA---AAC-CA
----------------------TTGA------------AAGCC-AAG-CA
--------------------------------------------------
----------------------GGGG------------GACAA-GGG-GG
----------------------GAGG------------AAGCC-AAG-CA
----------------------GGGG------------GAGCT-CAG-CG
G---------------------GAG-------------ACGCC-AAG-CG
GAGG------------------GGGG------------AAGCC-ATG-CA
T---------------------GAG-------------AAGCC-AAG-CG
----------------------GTGGGG----------AGGCC-AAG-CA
----------------------GTGGGG----------AGGCC-AAG-CA
----------------------GTGGGG----------AGGCC-AAG-CA
----------------------GTGGGG----------AGGCC-AAG-CA
----------------------GTGGGG----------AGGCC-AAG-CA
C---------------------GAGG------------AGGCC-TGG-TA
----------------------GTGGAG----------GATCC-CAG-CA
----------------------G-GGA-----------TAGCC-GAG-CA
----------------------GAGG------------AAGCC-AAG-CA
GG--------------------GAGG------------AAGGC-AGG-GA
----------------------GAGG------------AAGCC-AGG-GA
----------------------GTGGGA----------GAGCC-AGA-CA
----------------------GTGGGA----------GAGCC-AGA-CA
----------------------GTGGGA----------GAGCC-AGA-CA
----------------------G-GCG-----------ACGGC-AAG-CG
----------------------G-GGG-----------ACGGC-AAG-CG
----------------------GTGGGG----------AGGCC-AAG-CA
----------------------GTGGGG----------AGGCC-AAG-CA
----------------------GTGGGG----------AGGCC-AAG-CA
----------------------GTGGGG----------AGGCC-AAG-CA
----------------------GGGG------------ACGCC-AAG-CA
----------------------GGGG------------ACGCC-AAG-CA
----------------------GTGG------------GCGTT-AGG-CA
GG--------------------AAGG------------AAGCC-GAG-AA
T---------------------GAA-------------AAGCC-GAG-CA
TT--------------------CCGG------------AAGCC-GGG-CA
GCGC------------------GAGG------------AAGCC-AAG-CA
GCGC------------------GAGG------------AAGCC-AAG-CA
GCGC------------------GAGG------------AAGCC-AAG-CA
G---------------------GAGG------------AAGCC-AAG-CA
----------------------GGGG------------TAGCC-AAG-CA
----------------------GGGG------------TAGCC-AAG-CA
AT--------------------G-GG-------------TGCCGAAC-CC
AT--------------------G-GG-------------TGCCGAAC-CC
AT--------------------G-GG-------------TGCCGAAC-CC
AT--------------------G-GG-------------TGCCGAAC-CC
G---------------------GAA-------------AAGTC-AGG-AA
----------------------GCTA------------AACCC-AAG-TA
----------------------G-GGA-----------TAGCC-GAG-CA
----------------------GAGG------------AAGCC-AAA-CA
----------------------GAGG------------AAGCC-AAA-CA
----------------------GGGG------------AAGCC-AAA-CA
----------------------GAAG------------AAGCC-AAG-CA
--------------------------------------------------
GGGGGG----------------GAGG------------AGGTC-AAG-TG
GGGGGGG---------------GAGG------------AGGTC-AAG-TG
GGGGGGGGG-------------GAGG------------AGGTC-AAG-TG
----------------------GAGG------------AGGTC-AAG-TG
----------------------GCGGGC----------CATCC-CAG-CA
TT--------------------GCGGGG----------ACGCC-AAG-CA
TT--------------------GCGGGG----------ACGCC-AAG-CA
GT--------------------GTGGGG----------ACGCC-AAG-CA
----------------------GCGGGG----------ACGCC-AAG-CA
----------------------GCGGGG----------ACGCC-AAG-CA
----------------------G-GGC-----------AAGTC-AAA-CA
----------------------G-GGC-----------AAGTC-AAG-CA
----------------------GAGCGG----------AGACC-AAG-CA
GAGGGG----------------GAGG------------GAGCC-AAGCCA
----------------------GAGG------------AAGCC-AAGCCA
GG--------------------GAGGGGGAAGG-----GAGCC-ACG-CA
----------------------G-GGC-----------CAGCC-CCG-CA
----------------------G-GGC-----------CAGCC-CCG-CA
----------------------G-GGC-----------CAGCC-CCG-CA
GG--------------------GAGG------------AAGCC-AAG-CA
GG--------------------GAGGGGGAAGG-----GAGCC-ACG-CA
----------------------GTGGA-----------AAG---AGGCCT
G---------------------GTA-------------AGGCCACGG-CA
G---------------------GTA-------------AGGCCACGG-CA
GG--------------------GAGG------------AAGCC-AGG-CA
GG--------------------GAGG------------AAGCC-AGG-CA
----------------------GAGGGG----------AGGCC-AGG-CA
----------------------GTGGAAA---------AAGCC-AAG-CA
----------------------GTGGAAA---------AAGCC-AAG-CA
----------------------GTGGAAA---------AAGCC-AAG-CA
----------------------GTGGAAA---------AAGCC-AAG-CA
----------------------GTGGAAA---------AAGCC-AAG-CA
----------------------GTGGAAA---------AAGCC-AAG-CA
----------------------G-GGC-----------AAGTC-AAG-CA
----------------------GACG------------AAGAC-AGG-TA
GG--------------------GGGG------------AGGCC-ATG-CA
----------------------GAGGAG----------AAGCC-AAG-CA
CG--------------------GTG-------------TGTCT-GGG-CA
----------------------GAGCCG----------AGGTC-AAG-CA
----------------------GAGCCG----------AGGTC-AAG-CA
----------------------GGGG------------AAGCT-AAA-CA
----------------------G-GGA-----------AGTCC-GAG-CG
--------------------------------------------------
GG--------------------GAGG------------AAGCC-AAG-CA
GC--------------------GAGG------------AGGCC-AAG-CA
G---------------------GAGGG-----------AAGCC-AAG-CA
GG--------------------GGCG------------GAGCT-AAG-CA
G---------------------GAT-------------AAGCG-AAG-GA
TT--------------------GAA--------------ATCAACAG-CG
----------------------G-GCT-----------TCGCC-ACA-CA
----------------------G-GGC-----------CAGCC-CCG-CA
----------------------G-GGC-----------CAGCC-CCG-CA
GG--------------------GAAG------------AGGCC-AAG-CA
----------------------GGGG------------ACGCC-AGA-CA
----------------------GGGG------------AGGCC-AAG-CA
----------------------GGGG------------AGGCC-AAG-CA
GGG-------------------GAG-------------AAGCC-AGG-CA
G---------------------GAAGG-----------AAGTC-AAG-CG
GG--------------------GAAG------------AAGTC-AAG-CG
G---------------------GAAGG-----------AAGTC-AAG-CG
GG--------------------GAAGG-----------ATGCC-ATG-CA
GG--------------------GAAGG-----------ATGCC-ATG-CA
----------------------GAGAG-----------AGGCT-AGG-CA
--------------------------------------------------
----------------------GGGG------------AAGCC-GAG-CA
--------------------------------------------------
--------------------------------------------------
----------------------GACGTAA---------GAG---------
----------------------GAGGGGGGGGAG----AAGCC-CAG-CA

--------------------------------------------------
--------------------------------------------------
-G------------------------------------------------
-G------------------------------------------------
-G------------------------------------------------
-G------------------------------------------------
-G------------------------------------------------
-G------------------------------------------------
-T------------------------------------------------
-G------------------------------------------------
-G------------------------------------------------
-G------------------------------------------------
-G------------------------------------------------
-G------------------------------------------------
-G------------------------------------------------
-G------------------------------------------------
-G-------------------------------------------CCCCC
-G------------------------------------------------
-G------------------------------------------------
-G------------------------------------------------
-G------------------------------------------------
--------------------------------------CACGCCCCGCTC
-----------------------------------------GCCCCGCTC
-----------------------------CACGCCCCGCTCCTCCCGCTC
--------------------------------------------------
-G------------------------------------------------
-A------------------------------------------------
-G------------------------------------------------
--------------------------------------------------
--------------------------------------------------
-G------------------------------------------------
-G------------------------------------------------
-G------------------------------------------------
-G------------------------------------------------
-G------------------------------------------------
-G------------------------------------------------
-G------------------------------------------------
-G------------------------------------------------
-G------------------------------------------------
-G------------------------------------------------
-G------------------------------------------------
--------------------------------------------------
-G------------------------------------------------
-G------------------------------------------------
-GA-----------------------------------------------
-G------------------------------------------------
-G------------------------------------------------
-G------------------------------------------------
-G------------------------------------------------
-G------------------------------------------------
-G------------------------------------------------
-G------------------------------------------------
-G------------------------------------------------
-G------------------------------------------------
--------------------------------------------------
-G------------------------------------------------
-G------------------------------------------------
-G------------------------------------------------
-G------------------------------------------------
-G------------------------------------------------
--------------------------------------------------
-G------------------------------------------------
--------------------------------------------------
-G------------------------------------------------
--------------------------------------------------
--------------------------------------------------
-G------------------------------------------------
-G------------------------------------------------
-G------------------------------------------------
-G------------------------------------------------
-G------------------------------------------------
--------------------------------------------------
-G------------------------------------------------
-C------------------------------------------------
-G------------------------------------------------
-G------------------------------------------------
-G------------------------------------------------
-G------------------------------------------------
-G------------------------------------------------
-G------------------------------------------------
-G------------------------------------------------
-G------------------------------------------------
--------------------------------------------------
-G------------------------------------------------
-G------------------------------------------------
-G------------------------------------------------
-C------------------------------------CCCCACGGCGGC
-C------------------------------------------------
-C------------------------------------------------
-G------------------------------------------------
-G------------------------------------------------
-G------------------------------------------------
-G------------------------------------------------
-G------------------------------------------------
-G------------------------------------------------
-G------------------------------------------------
-G------------------------------------------------
-G------------------------------------------------
-G------------------------------------------------
-G------------------------------------------------
-G------------------------------------------------
-G------------------------------------------------
-G------------------------------------------------
-G------------------------------------------------
-G------------------------------------------------
--------------------------------------------------
--------------------------------------------------
-G------------------------------------------------
-C------------------------------------------------
-G---------------------------------------------GGG
-G------------------------------------------------
-G------------------------------------------------
-G------------------------------------------------
-G------------------------------------------------
-G------------------------------------------------
-G------------------------------------------------
-G------------------------------------------------
-G------------------------------------------------
--------------------------------------------------
-A------------------------------------------------
-C------------------------------------------------
-G------------------------------------------------
-G-------------------------------CCGTCACCCCCCCCCTC
-G------------------------------------------------
-G------------------------------------------------
-G--------------------------------------------CCCC
-G--------------------------------------------CCCC
-G------------------------------------------------
--------------------------------------------------
-G--------------------------------------------CCCC
-G--------------------------------------------CCCC
-G--------------------------------------------CCCC
-G------------------------------------------------
-G------------------------------------------------
-G----------------------------------CCGTCACCCCCCCC
-G------------------------------------------------
-G------------------------------------------------
-G------------------------------------------------
-G------------------------------------------------
-G------------------------------------------------
-G------------------------------------------------
-G------------------------------------------------
-G------------------------------------------------
-G------------------------------------------------
-G------------------------------------------------
-G------------------------------------------------
--------------------------------------------------
-G------------------------------------------------
-G------------------------------------------------
-G------------------------------------------------
-G------------------------------------------------
-G------------------------------------------------
-G--------------------------------------------TCCC
-G------------------------------------------------
-G-----------------------------------------------T
-G------------------------------------------------
-G------------------------------------------------
--------------------------------------------------
--------------------------------------------------
--------------------------------------------------
--------------------------------------------------
--------------------------------------------------
-G------------------------------------------------
-G------------------------------------------------
-G------------------------------------------------
-G------------------------------------------------
-G------------------------------------------------
-G------------------------------------------------
-G------------------------------------------------
-G------------------------------------------------
-G------------------------------------------------
-G------------------------------------------------
-G------------------------------------------------
-G------------------------------------------------
-G------------------------------------------------
-G------------------------------------------------
-G------------------------------------------------
-G------------------------------------------------
-G------------------------------------------------
-G------------------------------------------------
-G------------------------------------------------
--------------------------------------------------
-G------------------------------------------------
-G------------------------------------------------
-G------------------------------------------------
-G------------------------------------------------
-G------------------------------------------------
-G------------------------------------------------
-G------------------------------------------------
--------------------------------------------------
-G------------------------------------------------
-G------------------------------------------------
-G------------------------------------------------
-G------------------------------------------------
-G------------------------------------------------
--------------------------------------------------
-G------------------------------------------------
-G------------------------------------------------
-G------------------------------------------------
-G------------------------------------------------
-G------------------------------------------------
--------------------------------------------------
-G------------------------------------------------
-G------------------------------------------------
--------------------------------------------------
--------------------------------------------------
-G------------------------------------------------
-G------------------------------------------------
-G------------------------------------------------
-G------------------------------------------------
-G------------------------------------------------
-G------------------------------------------------
-G------------------------------------------------
-G------------------------------------------------
-G------------------------------------------------
-G------------------------------------------------
-G------------------------------------------------
-G------------------------------------------------
--------------------------------------------------
--------------------------------------------------
--------------------------------------------------
--------------------------------------------------
--------------------------------------------------
-G------------------------------------------------
-G------------------------------------------------
-G------------------------------------------------
-G------------------------------------------------
-G--------------------------------------CGCACCCCCA
-G--------------------------------------CGCACCCCCA
-G------------------------------------------------
-G------------------------------------------------
-G------------------------------------------------
-------------------------------------------------A
--------------------------------------------------
-G------------------------------------------------
-G------------------------------------------------
-G------------------------------------------------
-G------------------------------------------------
-G------------------------------------------------
-C------------------------------------------------
-A------------------------------------------------
-A------------------------------------------------
-G------------------------------------------------
AG----------------------------------------CACCTTCC
-G------------------------------------------------
-G------------------------------------------------
-G------------------------------------------------
-G------------------------------------------------
-G------------------------------------------------
-G------------------------------------------------
-G------------------------------------------------
-G-----------------------------------------------C
-G------------------------------------------------
-G------------------------------------------------
-G------------------------------------------------
-G------------------------------------------------
-G------------------------------------------------
-G------------------------------------------------
-G------------------------------------------------
-G------------------------------------------------
-G------------------------------------------------
-G------------------------------------------------
-G------------------------------------------------
-G------------------------------------------------
-G------------------------------------------------
-G------------------------------------------------
-G------------------------------------------------
-G------------------------------------------------
-G------------------------------------------------
-G------------------------------------------------
-G------------------------------------------------
-C------------------------------------------------
-G------------------------------------------------
-G------------------------------------------------
-G------------------------------------------------
-G------------------------------------------------
-G------------------------------------------------
-G------------------------------------------------
-G------------------------------------------------
-G------------------------------------------------
-G------------------------------------------------
-G------------------------------------------------
-G------------------------------------------------
-G------------------------------------------------
-G------------------------------------------------
-G------------------------------------------------
-G------------------------------------------------
-G------------------------------------------------
-G------------------------------------------------
-G------------------------------------------------
-G------------------------------------------------
-G------------------------------------------------
-G------------------------------------------------
-G------------------------------------------------
-G------------------------------------------------
-G------------------------------------------------
-G------------------------------------------------
-G--------------------------------------------CACC
-G--------------------------------------------CACC
-G------------------------------------------------
-G------------------------------------------------
-G------------------------------------------------
-G------------------------------------------------
-G------------------------------------------------
-G------------------------------------------------
--------------------------------------------------
--------------------------------------------------
--------------------------------------------------
--------------------------------------------------
--------------------------------------------------
-G------------------------------------------------
-G------------------------------------------------
-G------------------------------------------------
-G------------------------------------------------
-G------------------------------------------------
-G------------------------------------------------
-G------------------------------------------------
-G------------------------------------------------
-G------------------------------------------------
-G------------------------------------------------
-G----------------------------CTCCCCTTCCCACCTCACAC
-A------------------------------------------------
-G------------------------------------------------
-G------------------------------------------------
-G------------------------------------------------
-G------------------------------------------------
-G------------------------------------------------
AG------------------------------------------------
AG------------------------------------------------
AG------------------------------------------------
-G------------------------------------------------
-G------------------------------------------------
-G------------------------------------------------
-G------------------------------------------------
-G------------------------------------------------
-G------------------------------------------------
-G------------------------------------------------
-C------------------------------------------------
-A------------------------------------------------
-G------------------------------------------------
-G------------------------------------------------
-G------------------------------------------------
-G------------------------------------------------
-G------------------------------------------------
-G------------------------------------------------
-G------------------------------------------------
-G------------------------------------------------
-G------------------------------------------------
-G------------------------------------------------
-G------------------------------------------------
-G------------------------------------------------
-G------------------------------------------------
-G------------------------------------------------
-G------------------------------------------------
-G------------------------------------------------
-G------------------------------------------------
-G------------------------------------------------
-G------------------------------------------------
-G------------------------------------------------
-G------------------------------------------------
--------------------------------------------------
-G------------------------------------------------
--------------------------------------------------
--------------------------------------------------
--------------------------------------------------
--------------------------------------------------
-G------------------------------------------------
AG------------------------------------------------
-G------------------------------------------------
-G------------------------------------------------
-G------------------------------------------------
-G------------------------------------------------
-G------------------------------------------------
-G------------------------------------------------
-G------------------------------------------------
-G------------------------------------------------
-G------------------------------------------------
-G------------------------------------------------
-G------------------------------------------------
-G------------------------------------------------
-G------------------------------------------------
-G------------------------------------------------
-G------------------------------------------------
-G------------------------------------------------
--------------------------------------------------
-G------------------------------------------------
-G------------------------------------------------
-G------------------------------------------------
-G------------------------------------------------
-G------------------------------------------------
--------------------------------------------------
--------------------------------------------------
--------------------------------------------------
--------------------------------------------------
--------------------------------------------------
-G------------------------------------------------
--------------------------------------------------
--------------------------------------------------
-G------------------------------------------------
-G------------------------------------------------
-G------------------------------------------------
-G------------------------------------------------
-G------------------------------------------------
-G------------------------------------------------
-G------------------------------------------------
-G------------------------------------------------
-G------------------------------------------------
-G------------------------------------------------
-G------------------------------------------------
-G------------------------------------------------
-G------------------------------------------------
-G------------------------------------------------
-G------------------------------------------------
-G------------------------------------------------
-G------------------------------------------------
-G------------------------------------------------
-G------------------------------------------------
--------------------------------------------------
-G------------------------------------------------
-A------------------------------------------------
-G------------------------------------------------
-G------------------------------------------------
-T------CACAGCCACCTTTGCTCCTTTTTCGTCTTCAGTGTGCCATAT
-G------------------------------------------------
-G------------------------------------------------
-G------------------------------------------------
-G------------------------------------------------
-G------------------------------------------------
-G------------------------------------------------
--------------------------------------------------
--------------------------------------------------
-G------------------------------------------------
-G------------------------------------------------
-G------------------------------------------------
-G------------------------------------------------
-G------------------------------------------------
-G------------------------------------------------
-G------------------------------------------------
-G------------------------------------------------
-G------------------------------------------------
-C------------------------------------------------
-G------------------------------------------------
-G------------------------------------------------
-G------------------------------------------------
-G------------------------------------------------
-G------------------------------------------------
-G------------------------------------------------
-G------------------------------------------------
-G------------------------------------------------
-A------------------------------------------------
-G------------------------------------------------
AG------------------------------------------------
-G------------------------------------------------
-G------------------------------------------------
-G------------------------------------------------
AG------------------------------------------------
AG------------------------------------------------
AG------------------------------------------------
-G------------------------------------------------
-G------------------------------------------------
-G------------------------------------------------
-G------------------------------------------------
-G------------------------------------------------
-G------------------------------------------------
-G------------------------------------------------
-G------------------------------------------------
-G------------------------------------------------
-G------------------------------------------------
-G------------------------------------------------
AG------------------------------------------------
-G------------------------------------------------
--------------------------------------------------
-G------------------------------------------------
-G------------------------------------------------
-G------------------------------------------------
-G------------------------------------------------
-G------------------------------------------------
-G------------------------------------------------
-G------------------------------------------------
-G------------------------------------------------
-G------------------------------------------------
-G------------------------------------------------
-G--------------------------------CCCCCCCCCCCCCACA
-G------------------------------------------------
--------------------------------------------------
-G------------------------------------------------
-G------------------------------------------------
-G--------------------------------CCCCCCCCCCCCCCCC
-G--------------------------------CCCCCCCCCCCCCCAC
-G-----------------------------------------CTCCCCG
-G-----------------------------------------CTCCCCG
-G------------------------------------------------
-G------------------------------------------------
-G-----------------------------------------CTCCCCG
-G------------------------------------------------
-G------------------------------------------------
-G------------------------------------------------
-G------------------------------------------------
-G------------------------------------------------
-G------------------------------------------------
-G------------------------------------------------
-G------------------------------------------------
-G------------------------------------------------
-G------------------------------------------------
-G------------------------------------------------
-G------------------------------------------------
-G------------------------------------------------
-G------------------------------------------------
-G------------------------------------------------
-G------------------------------------------------
-G------------------------------------------------
-G------------------------------------------------
-G------------------------------------------------
-G------------------------------------------------
-G------------------------------------------------
-G------------------------------------------------
-G------------------------------------------------
-G------------------------------------------------
-G------------------------------------------------
-G------------------------------------------------
-G------------------------------------------------
-G------------------------------------------------
-G------------------------------------------------
-G------------------------------------------------
-G------------------------------------------------
-G------------------------------------------------
--------------------------------------------------
-G------------------------------------------------
-G------------------------------------------------
-G------------------------------------------------
-G------------------------------------------------
-G------------------------------------------------
-G------------------------------------------------
-G------------------------------------------------
-G------------------------------------------------
-G------------------------------------------------
-G------------------------------------------------
-G------------------------------------------------
-G------------------------------------------------
-G------------------------------------------------
-C------------------------------------------------
-G------------------------------------------------
-G------------------------------------------------
-G------------------------------------------------
-C------------------------------------------------
--------------------------------------------------
-G------------------------------------------------
-A------------------------------------------------
-G-------------------------------------------CCCCC
-G------------------------------------------------
-G------------------------------------------------
-G------------------------------------------------
-G------------------------------------------------
[truncated: 1,303,919 more chars]
