# Supplementary material for: Members of a Large Retroposon Family Are Determinants of Post-Transcriptional Gene Expression in Leishmania
Source: PLoS Pathog. 2007 Sep 28;3(9):e136. doi: 10.1371/journal.ppat.0030136 (PMC2323293; doi:10.1371/journal.ppat.0030136)
Supplement: Figure S2 — This alignment was generated from the one presented in Figure S1 by deleting all positions showing a gap for at least 50% of the aligned sequences. (553 KB DOC) [file ppat.0030136.sg002.doc]

1013 538
24.00477  CCCTGATGGCGAGGGACCTCACAGTGCGATGCCAGGGTCCAGCGTACGGC
36.01076  CCCTGATGACGGGGGACACCTCAGCGTGGTGACCGGGTCACGTGTACG--
29.00524  CTCTGAAGACGAGGGTCGCCTCAGCCCAGCGTCAGGGTCCAGTA-GCCCC
35.01090  CCCTGATGACGAGGACTACCCCCGCGTAACATCAGAGTCCAGCGC-CCTC
31.00641  CCCAGATGACGAGA-ACACCTCAGCCTGCTCTCAGGGTTCGGTGC-CTAG
33.00760  CCCGGACGATGGGGGGCGTCTCAGCGTGGTATTAGGGCACAGCACTCC--
36.01128  CCCTTTTGATGAGAGGCACCCCACGAGGGCGTCAGGGCCCTGCACATTC-
36.01087  CCGTGATGACGGGGAACACATCGGTGTGGTATCAGGGTGCAAGA-GCCCC
35.01074  GCCTGCTGACGAGGGGCAACTCAGTGTGGTATCAGCGCCCACTGCACCCC
34.00878  CCCTGATGACGAAGGACACCACAGGCTGGTGTCAGCGTCCAGTGCGCCCA
31.00653  CCCTGAGTCCGAGGGGCACCTCGGTGTGGTATCAGGGTCCAGCGCACCCC
25.00573  CACTGACGGCGAGGGACACCTCAGCGTCGTCTCAGGGCTCCGTGCACCCC
38.00225  CCGGGGGGGGGAGGGACACCTCAGTGCGGCATCAGGGCCCTGTGCACGCC
34.00863  CCCTCTTGACGAGGGACCCCACAGTGTGATATCAGGGTCCGGTACACCTC
14.00386  CCCTGATGACGAGGGGCACCTGAGTGTGGCATCAGGGCCCACT--ACCC-
14.00378  CCCGGATGCCGAGGGACACCTCCGCGTGGGATCAGGGCTCGACA-GCCCC
28.00581  CCCTTATGACGGGGGCCACCTCAGCGTGGCATCAGGACACAAGGGGCCAC
37.00279  CCGTGATGACGAGGGGCACCTCCGCGTGGCATCAGGGCCCAGCGCACCCC
37.00280  CCGTGATGACGGGGGGCACCTCCGCGTGGCATCAGGGCCCAGCGCACCCC
37.00282  CCCGGATGACGGGGGGCACCTCCGCGTGGCATCAGGGCCCAGCGCACCCC
37.00283  CCCCAATGACGGGATGAACCTCCGCGTGGCATCAGGGCCCAGCGCACCCC
37.00285  TACTGATGACGAGGCGCACCTCTGTGTGGTAATAGGCTGCAGGGCAGCCC
37.00286  CCCTGATGACGACGGGCACCTCTGTGTGGTAATAGGCTGCAGGGCAGCCC
37.00287  CACGGATGACGGGGTACACCTCTGTGTGGTAATAGGCTGCAGGGCAGCCC
37.00284  TGCTAATCACGTGGGACACCTCCGTGTGGTAATAGGCTGCAGGACAGCCC
38.00224  CCGTGATAACGAGGGACATCTCAGTGCGGCATCAGGGCCCGGTGCACGCC
38.00228  TCCGGATGAAGAGGGGCGCCTCAGTGGGGTGGGGGGGGTGGGTCATCCCC
38.00229  --------------------------------------------------
38.00230  TCCGGGTGACGAGGGACACCTCCGTGCGTCATCGCGGCCCAGCGCCCCCC
38.00231  CCCGGGTGACGAGGGACACCTCCGTGCGTCATCGCGGCCCAGCGCCCCCC
39.00295  CCTTGATGACGAAGC--GCTGCAGTGTGGCGTCAGGCGCCAGTGCACCCA
39.00297  TCCAGATG--G-GTTTCACTTTCTCGTGGTCGCAGGCAC--GCACACCTC
39.00299  CCCTCATGACGCGG-ACACCTCAGTGTGGCATCAGAGCCCAGTGC-CCCC
39.00298  GCTTGATCTCGTGGGAGGCCTCGGTGTGGTTTAAGGGCCCGGTGCACCC-
04.00427  CCGTGATGACGAGGGCCAACTCAGCGTGGTATCAGGGTCCAGTGC-CC--
04.00428  CCCTGATGACGAAGGCCAACTCAGCGTGGTATCAGGGTCCAGTGC-CC--
04.00420  TTGTGAGGGCGATGGAGGTGGGAGAGGCCTTGCAGGCCTCTCTGCTCCCG
04.00422  CCCGGGTGACGAGGGACACCGCAGCGTGGTGCCAGCGGCCAGTGCACGCC
04.00424  CCCGGGTGACGAGGGACACCGCAGCGTGGTGCCAGCGGCCAGTGCACGCC
04.00425  CCCGAACGACGAGGGACACCGCAGCGTGGTGCCAGCGGCCAGTGCACGCC
04.00426  CCCGAACGACGAGGGACACCGCAGCGTGGTGCCAGCGGCCAGTGCACGCC
04.00419  CGCTGACG-CGAGGGGTGCGTGTGTGTGGTATGAGGGTCCGGTGCACCCC
04.00416  CCCTGATGACGATAAGCGCCTCGCCACGGTATGCGTGTTC-GT-TACCC-
04.00417  CCCTGATGACGATAAGCGCCTCGCCACGGTATGCGTGTTC-GT-TACCC-
04.00418  CCCAGATGACGTCGGGCACCTCAGAGTGGTATCAGGGTCAAGTGTACG--
05.00335  CCCTGGTGACGGGAG-TGCCTCAGCGCCGCATCAGAGTCCAGTACTCCCC
05.00336  CTCTGAATACGACGGTCGCCTCGGTGCCGCATCAGAGTCCAGTACTCCCC
05.00340  CCCTGATGGCGAGGG-----------------------------------
05.00346  CCCTGATGACGGGGGAGACCCCAGCGCGGTGTGAGGGTCGAGTACACCCC
05.00347  CCGTAAAGTCGAGG-ACACCCCAGCGCGGTGTGAGGGTCGAGTACACCCC
05.00349  CCCTCATGACGGGGTACACCCCGGTGTGGTATCAGGGTCCAGTACATCAC
05.00350  CCCTCATGACGGGGTACACCCCGGTGTGGTATCAGGGTCCAGTACATCAC
05.00352  CTCTGATGACG-GGGACACCCCGGTGTGGTATCAGGGTCCAGTACATCAC
05.00337  GACTGATGACGACGGTCGCCTCGGTGCCGTATCAGAGTCCAGTACGCCCC
05.00344  CCCTGATAACGAGGGACAGCTCAGTGCGGGATCAGGGCTCA-TGCACGCC
05.00353  AACTGATGACAGATGACACACTAGCGGGGTGGCAGGGTGCAGTGCATCCC
05.00338  TC-TGATGACGACGGTCGCCTCGGTGCCGTATCAGAGTCCAGTACTCCCC
06.00296  CCCCGATGACGTGGGCCACCTCAGCGTGGTGTCAATGTCCAGTGCAC---
06.00298  CTTTGATGACGTGGGCCACCTCAGCGTGGTGTCAATGTCCAGTGCAC---
06.00302  CCCGGATGAAG-GGGACACCTCAGTGTGCTGTCCGGGTCCGGTAAACCGC
06.00308  TCTTGATGACGGGGGACACCTCAGTGTGGTGTTAGGGCCCGGCACACACA
06.00311  CCATGATGACGTGGCACACCTCCCTGCGGCACCGGCGTCCAGCGTACG--
06.00314  CCCTTCTGTTGCGCGAGACGTGCCGCCCAAACTGTACTGCAGCAATCTCT
06.00315  CCATGATGACGTGGCACACCTCCCTGCGGCACCGGCGTCCAGCGTACG--
06.00312  CTCTGATGGCGAGGGACACCTCCGTGTGGCATCAGGGTCCAGTACCCCCC
06.00313  CCCTGATGGTGAGGGACACCTCCGTGTGGCATCAGGGTCCAGTACACCAA
06.00303  GCCTGATGACGTGGGACACCTCAGTGTGCTGTCCGGGTCCGGTAAACCGC
06.00305  GCCTGATGACGTGGGACACCTCAGTGTGCTGTCCGGGTCCGGTAAACCGC
06.00307  CGCAGTAGA-GTGGGACACCTCAGTGTGCTGTCCGGGTCCGGTAAACCGC
06.00316  CCATGATGACGTGGCACACCTCCCTGCGGCACCGGCGTCCAGCGTACG--
06.00317  CGCGGATGACGAAGGACACCTCGAGGTGGCTTCAGTGTCCGGTG------
06.00318  CCCTTATGATGGTGGACACCTGTGCATGGTGCTAGGACGAAGCA------
06.00319  TCCTGATGTAGGGGGACACCTCAGTGTGGCACCGGTGCCCAGTG--CTT-
07.00411  CCCTCATGACGTGGGACACCTCCGCGTGGCATCCGGGTCCGGTG--GTCC
07.00414  CTCGGGTGAAAGGCAAAGCCTTTTGGTGAAACCAGGGTCCTGTGCAGCCC
07.00420  CTCTGATCATGAGGGACACCTCACCGTGATAACAGGGTGCAGGC-CCCCC
07.00426  TGCTGATGACGAGGGACAC-------------CAGGGCCCGGTG--GTCC
07.00427  GCCTAGCGATGAAGGGCACCTCCGAGACACACCAGGGCCCGGTG--GTCC
07.00428  GCCTGATCATGGGGAGCACCTGCGTGTCGTATTAATGCTCAGTG--CCCC
07.00429  ACCGGGAGATGAGGGGCACCTCTGAATGACATCAGGGCCCGGTG--GTCC
07.00430  CACGGATGAGGATGGGCACCTCCGTGTCGTATTAATGCTCAGTG--CCCC
07.00431  CCCGGCTGCCGAGGGGCACCTCTGAATGACATCAGGGCCCGGTG--GTCC
07.00406  TCCT-ATGAGGAAAGACACAGC-------CATTGCTCTGTTGTG--CTTT
07.00407  CCCTCATGACGTGGGACACCTCCGCGTGGCATCCGGGTCCGGTG--GTCC
07.00408  CCCCCATGACGTGGGACACCTCCGCGTGGCATCCGGGTCCGGTG--GTCC
07.00409  CTCTCATGGTTTGCAACACCTCCGCGTGGCATCCGGGTCCGGTG--GTCC
07.00410  CGCTGATGGCGAGGGACACCTCCGCGTGGCATCCGGGTCCGGTG--GTCC
07.00412  CTCAGGTGACGAGGGACACCTCCGCGTGGCATCCGGGTCCGGTG--GTCC
07.00413  CTCAGGTGACGAGGGACACCTCCGCGTGGCATCCGGGTCCGGTG--GTCC
07.00417  CCCGGGTGACGAGGGACGCTTCCGCGTGGCATCAGGGGTCAGCG--CCCC
07.00421  CCCTGCACACGAGTGACACCTCCACGTGGCATCCGGGTCCGGTG--GTCC
08.00368  CCCTGATGACAGGGGCCCCCTACGCATGGCACCAGGGGCCAGCACATCCC
08.00372  CGCTGATCATGAGGGCCCCCTCCGCATGGCACCAGGGGCCAGCACATCCC
08.00377  GGAGAGTGACGAGGAGCAC-------------------------------
08.00403  CCGTGGTGACGGGGGACACCTCGGCGCGATAGCGCGGTCCAGTAC-CCAC
08.00405  CCCTGGTGACGGGGGACACATCGGCGCGATAGCGCGGTCCAGTAC-CCAC
08.00396  ------------------------TTCGGGATCATCGCTCTCTCTGCCCT
08.00397  CCGTGATGGCGTCGGACCCCTCCGTGTGGTATCCGGGTACCGTGCACCCC
08.00398  CACTTATGAC-AGGGACGCCTCAAGGTGGTGGCAAAGCCCAGTACAC---
08.00399  CTCTGACGAC-AGGGACGCCTCAAGGTGGTGGCAAAGCCCAGTACAC---
08.00400  CCCTTTTGACAAGGG-CATCTCAGCGTGCCGTAGCGGCCCAGCAC-CC--
08.00401  GCCTTATGAGTATGG-CATCTCAGCGTGCCGTAGCGGCCCAGCAC-CC--
08.00402  CCCTTATGACGGGGGACACCTCGGTGCGATAGCGCGGTCCAGTAC-CC--
08.00404  CCCTGGTGACCGGGGACACATCGGCGCGATAGCGCGGTCCAGTAC-CC--
09.00351  CCCTGATGACAAGGGACGCCTACGTGCCGTGTCAGGCCCCAGCAC-CC--
09.00353  CCCTCATGACGAGGGACACCC--GTGTGGCGTCAGAGTCCAGTGCACCCC
09.00354  CCCTCATGACGAGGGACACCC--GTGTGGCGTCAGAGTCCAGTGCACCCC
09.00357  CCCCGATGACGAGGGACGCCTCCGTGTGGTACCATGGCCCAGCGCACCCC
09.00358  TCCTGGTGACCAGGCACGCATCTCTCTCGCTCGTCTCTCCACCCCACCGC
09.00360  TCCTGACGACGACAGTGTTGTCTGCGCAACGTTGGGGCTTTTTTCTGCC-
09.00362  CCCTGATGACGGGGGACGCCTCAATGCTGTATCGGGGTCCAGTGC-CCCT
09.00363  CCTTGATGACGAGGGACACCTCAGCGTGGTGTCAGGACCCCGTGAACCCC
09.00364  CCCT-CTGATGACAGACACCTCAGCGTGGTGTCAGGACCCCGTGAACCCC
09.00365  CTCT-TTGATGGGGCACACCTCAGCGTGGTGTCAGGACCCCGTGAACCCC
09.00366  CTCTGATGACGAGGGACACCTCAGCGTGGTGTCAGGACCCCGTGAACCCC
09.00367  CTCTGATGACGAGGGACACCTCAGCGTGGTACCATGGCCTCGTGCACCCC
09.00369  TGCTTCTCATGAGGGACACCTCAGCGTGGTGTCAGGACCCCGTGCACCTC
09.00371  TCCCGCTGATAAGAGACACCTCGGCGTGGTACCATGGCCTCGTGCACCCA
09.00368  CCATCATGACGAGGGACACCTCCATGTGGTGTCAGAGTCCAGTGCTCCTC
09.00355  CCCTCATGACGAGGGACACCTCCGTGTCGCACCAGGCTCCCGTGCACCA-
09.00359  ACGTGAACAGGCACAGTGCATGTGCGTGCGCCCAGGTCGATCTTCACCGC
10.00447  GCCTCATGACGGGGCATACCTCAGTGTGGTATCAGGACC-AGTAC-CG--
10.00448  TCCTCATGATGGCCTTCAGCGCATGGTGGTGTCAGTTCCCAGCACACCCG
10.00451  CCCCGATGACG-G--CCACCCCAACGCGGCATCAGGGTCCAGTGC-CCCC
10.00452  CCCCGATGACG-G--CCACCCCAACGCGGCATCAGGGTCCAGTGC-CCCC
10.00454  CCCTGATGACGAGGGACACCGCAACGCGGCATCAGGGTCCAGTGC-CCCC
10.00458  CCCTGATGACGAGGGACACCGCAACGCGGCATCAGGGTCCAGCGGGCCCC
10.00459  TCCTG-TGAAGGGGGAACCCTCCGCGTCGCTCCAGGGCCCAGTGCAGCCT
10.00450  CCC-GGCG-CGAGCGACGC-CCAGTGTGGTATAAGGTTCCAGTGC-CT--
10.00455  CCCTGATGACGAGGGACACTGCAACGCGGCATCAGGGTCCAGCGGGCCCC
10.00456  CCCTGATGACGAGGGACACCGCAACGCGGCATCAGGGTCCAGCGGGCCCC
10.00457  CCCTGATGACGAGGGACACCGCAACGCGGCATCAGGGTCCAGCGGGCCCC
10.00464  CCC-GGTG-CCAGG-ACACCTCAGTTTGGTGTCTGTTTTTACTAC-CCCC
10.00445  CCCCGCTGACTAGGGACGCCTCTCCGTGTGGTCATGGTTCAGTGC-CCTC
10.00449  TCCTCATGATGGCCTACACGTGATGGTGGTGTCAGTTCCCAGCACACCCG
10.00461  CCCTCATGACGTATGACGCCTCAGTGTGTGGTCATGGTTCAGTGC-CCCG
10.00463  TCTTGACATTGATAGAAACGTGAG--TTGCGTCAGGATTCAGTGC-CCTC
10.00465  CCTTGATGATGTGGGACACCTCTCCGTGTGGTCAGGGTCCGGTGC-CCTC
10.00466  GCCTGATGACAGGGGATACCTCAG--GGTTGTCAGGGTTCAGTGC-CCCG
10.00467  CCCTGCTGAGTAGGGACACCTCCCCGTGTGGTCATGGTTCAGTGC-CCCG
10.00468  CTCTGATAATTTGGGACACCTCCCCGTGTGGTCATGGTTCAGTGC-CCCG
10.00469  CCCCGCTGACTAGGGACGCCTCTCCGTGTGGTCATGGTTCAGTGC-CCTC
11.00327  CCCTGATGACGGGACACATCTCAGCGCCGTATCAGGGCTCAGTG-ACCCC
11.00328  CCCTGATGACGGGACACATCTCAGCGCCGTATCAGGGCTCAGTG-ACCCC
11.00329  CCCTGATGACGGGACACATCTCAGCGCCGTATCAGGGCTCAGTG-ACCCC
11.00330  CCCTGATGACGAGACACATCTCAGCGCCGTATCAGGGCTCAGTG-ACCCC
11.00332  CCCTCATGACGAGGGGCACCTCAGGGTGGTATCAGCGTCCAG--CTTCC-
11.00353  TCCTGACAACGGGGAACACGTCACTGTGGCATCAGTGCCCAGTCCACCCC
11.00354  TCCTGACAACGGGGAACACGTCACTGTGGCATCAGTGCCCAGTCCACCCC
11.00333  ACCTGATGACGAGGG-CACCTCCGTGTGGTATCGCGGTTCAGCACATCCA
11.00335  CCC-GGTTCTGGGCGACCCCTCGGCTAGACATCAGGCTCCAGCGCGCACC
11.00336  CCCTGATGGTGAGGGCCATCTCCGTGTGGCATCAGGCTCCAGCGCGCACC
11.00337  CCCTGATGACGCGGGGCATATCCGTGTGGCATCAGGGTCCAGCGCGCACC
11.00338  CCGCGATAACGAGGGGCATCTCCGTGTGGCATCAGGCTCCAGCGCGCACC
11.00339  CCCGGATGGCGCGGGACATCTCCGTGTGGCATCAGGCTCCAGCGCGCACC
11.00344  CCCGGATGCCGAGGGACACCTCGATATGGCATCAGGGCCCAGCACACCCC
11.00345  CCCGGATGCCGAGGGACACCTCGATATGGCATCAGGGCCCAGCACACCCC
11.00348  CGCTGATGACGAGGGGCCCCGCAGGGCGGCGTCAGGGTGCAGTGCAGCCC
11.00349  CTCTAATGATGAGGGGCCCCGCAGGGCGGCGTCAGGGTGCAGTGCAGCCC
11.00350  CTCTGATGACGAGGGGCCACGCCCTGTGGCGTCAGGGTGCAGTGCAGCCC
11.00351  CTCTGATGATGAGGGGCCCCGCAGGGCGGCGTCAGGGTGCAGTGCAGCCC
11.00352  CCCTGATGGCGAGGGGCCACGCAGGGTGGTGTCAGGGTGCAGTGCAGCCC
12.00409  ACGTGACGACCAGGGGCACCCCAGTGCGGCATCAGGGCGCCGCAC-----
12.00411  TCCTGATAGGGAGGGACGCTCCAGCGTGGTATCGGGGTTTTGTAC-CC--
12.00388  CCCTGATGACGAGGGACACCCCAGTGTGGCACCAGCGCGC-GCGCACACA
12.00390  CCCTCATGACCAGGCACACCCCAGTGTGGCACCAGCGCGC-GCACACACA
12.00385  CCTTCACGGCGAGGGACACCTCAGTGCGGCATCGGGGTCCAGGAC-CCCC
12.00386  CCTTCACGGCGAGGGACACCTCAGTGCGGCATCGGGGTCCAGGAC-CCCC
12.00392  CCCTCATCACGGGGGGCACCCCAGTGTGGCAT-----TC-AGTGCACACA
12.00393  TGCGGCTGCCGCGGT--------GTGTGGCAT-----TC-AGTGCACACA
12.00396  CCCGAATGATGAGGACTCCCTATGCGTGGT-TCAGGGCCAAGTGCTCC--
12.00399  TCCCGACGACGAGGGAGACCTCAATATGGTGTCAGGGTCCAGTACACCC-
12.00401  GCCTGATGACGCGGGGGATCATAGTATGCTATCAAGGTCCAGTACTCC--
12.00407  TGCTGGTGACGGGGG-CACCCCAGTGCGGCATCAGGGCGCCG--CACTC-
12.00405  TGCTGGTGACGGGGG-CACCCCAGTGCGGCATCAGGGCGCCG--CACTC-
12.00406  TACTGGTGACGGGGG-CACCCCAGTGCGGCATCAGGGCGCCG--CACTC-
12.00408  TGCTGGTGACGGGGG-CACCCCAGTGCGGCATCAGGGCGCCG--CACTC-
12.00404  TGCTGGTGACGGGGG-CACCCCAGTGCGGCATCAGGGCGCCG--CACTC-
12.00402  TGCTGGTGACGGGGG-GGCCCCAGTGCGGCATCAGGGCGCCG--CACTC-
12.00403  TGCTGGTGACGGGGG-CACCCCAGTGCGGCATCAGGGCGCCG--CACTC-
12.00395  CTCTGCTGACGAGGAACACCACAGCGTGGTGTCAGGGTCCCGTAAACCC-
13.00439  CCCTGTTGGCGAGAGACACTTCCGTGCCGTATCAGGGCCCAGCGCACCCC
13.00426  CCC-GATGATGAGGGACACCTTTCTGTGGTATCAGGGTCCAGTGCATCTC
13.00429  CCC-GATGATGAGGGACACCTTTCTGTGGTATCAGGGTCCAGTGCATCCC
13.00430  CCC-GATGATGAGGGACACCTTTCTGTGGTATCAGGGTCCAGTGCATCCC
13.00442  CGCTGATGACGTGGAACGCCTCCGTGTGGTATTGGTGTCCAGCGC-CCCC
13.00444  TCGTGCTGGCGATGGACACCTCAGTGTGGTATCGGGTTCCACTGCACCTC
13.00449  CCCGGATGATGCTACCTGCCTCAGTGTGGTATCGGGCTCCACTGCACCTC
13.00432  ACCTGATGACGGGGAACACCTCAGCGTGGTATCAGAGGCCGGTA--CTCC
13.00438  CCCTGTTGGCGAGGAACCTTTCCGTGCCGTATCAGAGCCCAGCG-ACCCC
13.00446  CCCTGATGACGAGGGGCCCCTCCGTGTCGTATCGGGCTCCACTGCACCTC
13.00450  CCTTGATGGCCGGCGATACTTCGCCCTGGTCTCAAGATCTAATG--CC--
13.00451  CCC-GATGACGAGGAAACCCTCTGCGTTGTATCCGGCTCCACTGCACCTC
13.00452  TCCTCCTGCCG------ACTTCACCGTGGTATCAGGGTCCGGGG-ACCCC
13.00454  CCTTCATGACAAGGGACGCCTCACCGTGGTATCAGGGTCTGGGG-ACCCC
13.00455  CGCTGACGGCCAGTGGCGTGTGAGTGTGGGAGAAAGATGCTGGGTAGCCT
14.00389  CCCTGATGGTGACGCGCACGTGAGTGTGGCATCAGGGCCCACTAC-CC--
14.00370  CCCGGACGACCTGGGACACCCCAGCGTGGCATCAGGGTCCGGTGCACCTC
14.00371  CCCGGACGACCTGGGACACCCCAGCGTGGCATCAGGGTCCGGTGCACCTC
14.00372  CCCGGACGACCTGGGACACCCCAGCGTGGCATCAGGGTCCGGTGCACCTC
14.00374  TCAGCACGACCTGGGACACCCCAGCGTGGCATCAGGGTCCGGTGCACCTC
14.00385  CCC-GATGACGAGGGGCACCTGAGTGTGGCATCAGGGCCCACTAC-CC--
14.00390  CCCTCAGGGCAAGGGATGCCTGCGCGTGGTATCAGGGCACACCACACC--
14.00391  CCCACAAAATGAGGGATACCTCGGCGTGGCATCAGGGCCTAGTACTCT--
14.00357  CCCTGATGACAAGGGACACCCCCATGTGACATCGCGATCCAGCAC-C---
14.00358  C-TTGGTGACAGGCGAAACTCCCATGTGACATCGCGATCCAGCAC-C---
14.00359  CCCTCATGACGTAGAATACCAAAGTGTCGCATCGGAACCCGGTCC-CCCC
14.00360  CCCTGATGAGGTGGAGAGCCCCAGTGTGGCATCGGGATCCGGTGC-CCCC
14.00361  CCCTCATGACGTAGAATACCACAGTGTCGCATCGGAACCCGGTCC-CCCC
14.00362  TCCTCATGACGTAGAACACCACAGTGTGGCATCGGGATCCGGTGC-CCCC
14.00363  CCCTGATGAGGTGGAGAGCCCCAGTGTGGCATTGGCATCCGGTGC-CCCC
14.00364  CCCTGATGAGGTGGAGAGCCCCAGTGTGGCATTGGCATCCGGTGC-CCCC
14.00365  CCCTCATGACGTAGAAAACCACAGTGTCGCATCGGGACCCGGTGC-CCCC
14.00367  CTCTGGTGAAAAGGGAAACCCCGGCACGGCATCAGAGTCCGGCAC-TC--
14.00384  CCCTGATGACGAGGGGCACGTGAGTGTGGCATCAGGGCCCACTAC-CC--
14.00387  GCC-AATGACGAGGGGCACCTGAGTGTGGCATCAGGGCCCACTAC-CC--
15.00413  CACTCGTGATGGGGCACACCTCAG---GGTAATAGGGTCCGGTACTCCC-
15.00414  TGCTGATGACGGGGGACACCTCGACATGGCATCAGGGGTCGGTACTCCG-
15.00415  CACC--TGATGCGGGACACCTCGGTATGGCATCAGGGTCACGTACACACC
15.00416  CACTCATGACGAAAAACACCTCGACATGGCATCAGGGTCACGTACACACC
15.00417  TACTCATGACGAAG-GCACCTCGGTATGGCATCAGGGTCACGTACACACC
15.00418  ACCTGACGGCAAGGGACACCTCGGTATGGCATCAGGGTCACGTACACACC
15.00420  CCATGGTCGCAAGGGACACCTCGGTATGGCATCAGGGTCACGTACACACC
15.00428  CCGTAATGGCGAGGGACACCTCCGAAGAGTATCGAGGTCCCGTACACCCC
15.00430  CCGTCATGGCGTGGGACACCATAATGTGGTATCGGAGACCCGTACACCCC
15.00422  CCCTCGTGGCGAGGG-----------------------------------
15.00427  CGCTCATCAATGGCTAAGC--------------------------ACTCT
15.00433  TCCTGGTGACGAGTGACCCCGCAGCGTGGCATCAGGTGGGGGT-CACCCA
15.00434  TCCTGGTGACGAGTGACCCCGCAGCGTGGCATCAGGTGGGGGT-CACCCA
16.00320  CACCGATGATGAGGGACTGCTGAGTGAGGCATGAAGGGCCAGTGCACCCC
16.00321  CCCTGATGCCATGCG-----------------GAGGGTCCAGTGCACCCC
16.00324  GCCTGATGATGACGAGTGTCTAAGGGCGATATCAGTGTTCCGCACACCG-
16.00339  CTCTGATGACGAGGGGCGCCACAGTGCGCTATC----TCGCATGCACACG
16.00322  ACCTGATGCCCACTG-----------------------------------
16.00328  CCCGGGTGACGAGAGATACCGCACGGTGTTGTCAGTGTCAAGTACGCTCC
16.00329  CCTTGACGA-GAGGCTTGCCTCCACGCGGCATCAGGGCCCAGCGCACCCC
16.00332  CCTTGACGA-GAGGCTCGCCTCCACGCGGCATCAGGGCCCAGCGCACCCC
16.00333  CCCTGGTGACGAGGGACACCTCAGCGCGGTATCGGGGCCCAGCGC-CCCC
16.00334  ---------------GCACCTCAGCGCGGTATCGGGGCCCAGTGC-CCCC
16.00343  CCGTAGTGCAGAGGAACATCTGGACGCTGGTGCAGCATGGACACAACGAC
16.00345  TCCTGGTGACTTGGGACACCTCAGCGTGCTATCAGGGCCCGGCGCACCCT
16.00346  CCCCAATGACAACGGACACCTCAGCGTGCTATCAGGGCCCGGCGCACCCT
16.00325  CCCTGATGACGAGGGGTGTCTAAGGGCGATATCAGTGTTCCGCACACCG-
16.00341  ACCTGATGAT----------------------------------------
17.00373  CCCGGATCACGAGGAACACCTCAGTGCGGCCTCAGGGTCCGGCGCACTCC
17.00375  CCCGGATCACGAGGAACACCTCAGTGCGGCCTCAGGGTCCGGCGCACTCC
17.00376  CCTGCCTGTCTGCGTACACCTCAGTGTGGCCTCAGGGTCCGGCGCACCCC
17.00377  TCATTATGACGAGGGACACCTCAGTGCGGCCTCAGGGTCCGGCGCACTCC
17.00381  CCATGACGACGAGGGACACCTCAGTGCGGCCTCAGGGTCCGGCGCACACC
17.00404  CTCTGA-GAAGCGAGACACCTCAGCGTGGCATGAGGGTCCCGCACAGCTC
17.00406  CGC-GATGATGAGGGACCGCTCGGTGTGGCATGAGGGTCCCGCACAGCTC
17.00407  CCTTTATAACGAGGGACCGCTCGGTGTGGCATGAGGGTCCCGCACAGCTC
17.00408  CCATGATGACGCGGGACACCTCGGTGTGGCATGAGGGTCCCGCACAGCTC
17.00410  CCATGATGACGCGGGACACCTCGGTGTGGCATGAGGGTCCCGCACAGCTC
17.00401  CCATGACGACGAGGGACACCCCCGTGTGACATCCGGTCCCTGCA-ATCAC
17.00379  CTCTGATGGCGAGGGACACCTCAGTGCGGCCTCAGGGTCCGGCG-ACTCC
17.00387  CCCTGAAGACGAGGCACACCTCCGTGCGGCATCAGGGTCCAG--CACCCC
17.00388  CCCTGATAGCTGGGGTGACCTCCGTGCGGCATCAGGGTCCAG--CACCCC
17.00391  CCCTGACGACGAGGCACACCTCCGTGCGGCATCAGGGTCCAG--CACCCC
17.00390  CCCTGATAGCTGGGGTGACCTCCGTGCTGCATCAGGGTCCAG--CACCCC
17.00392  TTCTGCTGACGGAGAACACCTCAGTGTGGCATTAGGGTCCAG--CACCCC
17.00393  CACTGAT-ACAACATGCAGACCATCGTGGCATCAGGGTCCAG--CACCCC
17.00394  CCCTGCTGACGAGGA-----TTGCGGCAACGTCAGGGTCCAG--CACCCC
17.00395  CCCTGATAGCTGGGGTGACCTCCGTGCGGCATCAGGGTCCAG--CACCCC
17.00389  CACAGATGAGGAGGGACACCTCCGTGCGCGGCCAGGGTCCAG--CACCCC
17.00398  CCTTGATGA-AAGGGATA--TCAG-GCGGTATCAGTGCTCAGTGC-CTCC
17.00378  CCCGGATCACGAGGGACCGCTCAGTGCGGCCTCAGGGTCCGGCGCACTCC
18.00507  CCCTGATGACGAGGGACACACTAGTGCGGTATCAGGGTGCAGTACTCCC-
18.00518  CCCTAATGACAAGGGACACCTCAGTGTGGTATAAGGGTCCGGTA-ACCTC
18.00522  CCCAGGTGTACACGCACCCCTCAGTGTGGTATAAGGGTCCGGTA-ACCTC
18.00486  CCCTCATGAGGAGGGACACCTCCGCGTGGCGTCAGGGCCCAGCG-ACCCC
18.00491  CTCTGATGACGAGCGACATCCCCGCTGGGCATCAACGCCCGGTGCACCCG
18.00501  CCCTCGTGAGGAGGGACACCTCCGCGTGGCATCAGGGCCCAGCG-ACCCC
18.00479  CACTCATGACGAGGGACACCTCCGCGTGGCGTCAGGGCCCAGCG-ACCCC
18.00481  CTTTCATGACGAGGGACACCTCCGCGTGGCATCAGGGCCCAGCG-ACCCC
18.00485  CCCTCAAGACGAGGGACACCTCCGCGTGGCGTCAGGGCCCAGCG-ACCCC
18.00487  CCCTCACAACGAGGGACACCTCCGCGTGGCGTCAGGGCCCAGCG-ACCCC
18.00489  CCCTCACGACGAGGGACACCTCCGCGTGGCGTCAGGGCCCAGCG-ACCCC
18.00513  CCCTGATGA-GAGGGACACCTCAGCGTGGCATTAGGGTGCAGCA--CCCT
18.00517  ACCAGGTGACGATTGCCCCCCCAGTGTGCTATCAGGGTGCGGTG--CGCC
18.00520  CCCTTTTGACGGGGGACACCTCAGTGTGACAT------GCACTGC-CCGC
18.00521  ACATGATGAAGAGGTAGACCGCGGTGTGGTATTAAGGTGCACTGC-CCGC
18.00528  CCCTGTCGACGGGGGACACCTCCGTGTGGTAACCGGACCCCGTGCCCCCC
18.00529  CCCTGTCGACGGGGGACACCTCCGTGTGGTAACCGGACCCCGTGCCCCCC
18.00530  CTCTGGCGACGGGGGACACCTCCGTGTGGTAACCGGACCCCGTGCCCCCC
18.00477  CACTCATGACGAGGGACACCTCCGCGTGGCATCAGGGCCCAGCGCCCCGC
18.00496  GCCTGATGA-GATGGGCACCGCAACGCGCCATCCTTGTCCAC--CATCC-
18.00497  CATTGACGACGAGA-ACACCGCAACGCGCCATCCTTGTCCAC--CATCC-
40.00373  CCCGGATGACGAGGGACACC-GAGCCTGGTAGCAGGGTCTAC--CACCT-
40.00374  CCCGGATGGCTCTGGACGCCTCAGTGCGGTG-CAGGGTCC-GCGCAC---
40.00376  GTCGGATTACGAGGGACACCGCAGCCTGGTAGCAGGGTCTAC--CACCT-
40.00377  CCCGGATGGCTCTGGACGCCTCAGTGCGGTG-CAGGGTCC-GCGCAC---
40.00395  CCCCCATGACGGGGGACACCTCCGTGTGCTATCAGGGTCCAGTGCACCCC
40.00396  CTCGGACGACGAGG-ACACCTCA------CATCAGGGTCCAGTGCACCCG
40.00399  CTCGGATGACGAGG-AAACCTCACCCTCACATCAGGGTCCAGTGCACCCC
40.00400  CCTTCATGACGAGGCACACCTCCGTGTGCTATCAGGGTCCAGTGCACCCC
40.00415  AACTGATGACGATG-ACACACTAGCGGGGTGGCAGGGTGCAGTGCATCCC
40.00401  CCCTGGTGACGAGGGAAACCTCGCCTTCGTATCAAGGTTCAGAGC-CCCC
40.00404  CCGTGGTGACGAGG-ACACCGCACAGTGATATCAGGACCCAACGC-CCTC
40.00365  CCCTGATGGCGAGGGACGCCTCAGTGTGGTATCGCGGTCCAGTAC-CCCC
40.00366  CCCTGATGGCGAGGGACGCCTCAGTGTGGTATCGCGGTCCAGTAC-CCCC
40.00367  CCCCGATAA-GGGGAATGCCTCAGTGTGGTATCGCGGTCCAGTAC-CCCC
40.00368  CCCTGATGACGAGGTACGCCTCAGTGTGGTATCGCGGTCCAGTAC-CCCC
40.00370  CCCTGATGAC-AGGGACACCTCAGCGTGGCATCAGGGTCGAGCACACCC-
40.00371  CCCCGATGAGAAGGGATCCCTCAGCGTGGCATCAGGGTCGAGCACACCC-
40.00387  TTCTGGTGGCTTGGGACACCTCAGTGTGGTATCAGGGTCCAGTGCACACA
40.00381  TCCTCATGGCATGGGGCACCTCAGTGTGGTATCAGGGTCCAGTGGACACA
40.00383  TCCTGGTGGCTTGGGACACCTCAGTGTGGTATCAGGGTCCAGTGCACACA
40.00385  CCCCGGTGGCTAGGGACACCTCAGTGTGGTATCAGGGTCCAGTGCACACA
40.00386  CCCCGGTGGCTAGGGACACCTCAGTGTGGTATCAGGGTCCAGTGCACACG
40.00406  CCCTTCTGGC-AGGGACATTGCAGTATGGCATCAGGGCCCAGTGCAC---
40.00407  CCCTAATGACGAGGGACATTGCAGCGTGGCATCAGGGCCCAGTGCAC---
40.00408  CCCCGCTGACGAGGGACATTTCAGTGTGGCATCAGGGCCCAGTGCAC---
40.00409  CCCTGATGACGAGGGACATTGCAACGTGGCATCAGGGCCCAGTGCAC---
40.00410  CCCTGATGACGAGGGACATTGCAGCGTGGCATCAGGGCCCAGTGCAC---
40.00411  CCCTGATGACGAGGGACATTGCAGCGTGGCATCAGGGCCCAGTGCAC---
20.00405  CCTTGATGGCGACGGACACCTCAGTGTCGTACCAGGGTCCAGCACACCCG
20.00406  CCGTCATGGCGGGGGACACCTCAGTGTCGTACCAGGGTCCAGCACACCCG
20.00408  CTCCGAGTCCGCGGGACACCTCAGTGTCGTACCAGGGCCCAGCACACCCG
20.00410  CCGTCATGGCGGGGGACACCTCAGTGTCGTACCAGGGTCCAGCACACCCG
20.00414  CCCTCACGACGGGGCACACAACAGTGTCGCACCAGGATCAAACACACTCA
20.00418  TCTCGATGACAAGGGACAACTCAGAGCGGCATCAGGGTCAGGCACACGAC
20.00420  CCCTGATGACGGGGGACAGCTCCGCCCCGCATCGGGGGCCAG-A-ACCC-
20.00404  CCTTGCTGACGAGGGCCACCTCGGCGTGGCATTGGAGACGCCCACACTCT
20.00411  TCATCACGGCGAGGGACCGCTCAGTGTCGAATCGCGGCCCGGCTCACTC-
20.00399  CCCGGATGACTGGGGACACT-CAGCGTGGTATCAGGGCGCCGTG-ATTTT
20.00401  CCATGATGACGAGGCACACCGCGGTGTGGTATCAGGGCGCCGTG-GTTTT
20.00421  CCACAATGACGTGGGACACCTCACTGCGGCATCAGGGTCCAGTGCACCC-
20.00423  TCCCGATGGAGTACGACACCTCACTGCGGCATCAGGGTCCAGTGCACCC-
20.00424  CCCTGATGACAAGGGACACCTCACTGCGGCATCAGGGTCCAGTGCACCC-
20.00428  CTATGACGACGAGGGACACCTCAGTGTCATATCAGGGTCCACTACACGC-
20.00429  CCCTCATGACGTGGG-CACCTCAGTATCGTATCAGGGTCCACTACACGC-
20.00430  CCCTCATGACGTGGG-CACCTCAGTGTCGTATCAGGGTCCGCTACACGC-
20.00400  CCCGGATGACTGGGGACA-CTCAGCGTGGTATCAGGGCGCCGTG-ATTTT
20.00425  CTCTGATGACGTGGGACCGCTCAGTGTCGTATCAGGGTCCGCTAGACGC-
20.00432  CCCTCGTGATGTGGGACCGCCCAGTGTCGTATCAGGGTCCGCTAGACGC-
20.00437  CTCTGATGACCAG--ACACCTCAGTGTCGTATCAGGGACCAGTACAC---
21.00346  CCCTGATGCCGAGA-GCACCTCAACGTGTTCTCACGGTCCAGTGC-CCC-
21.00349  CCGTGATGACTAGGGACACCTCCGTGCGGTGTCAGGGCCCAGTGC-CCCC
21.00351  CAGTGATGACGAGTGCCACGCCAGGGTGG---CCCGGTGGAAAGGGCCCC
21.00350  CCCTCATGACGAGAGGCACCTCAGCGTGG---------------CACCAC
21.00352  CCGTGATGGCAAGGGTGA--------------------------CACCAC
21.00353  CCCTGATGACGAGGGACACCTCAGCGTGG---------------CACCAC
21.00354  CCCTGATGACGAGGGACACCTCGGCGTGG---------------GAGCAC
21.00365  CCCAGATGATGTGGGACACCTCAGTGTGGTATCAGGGTCCAGTACACCCC
21.00366  TTCTGATGACGAGGGACACCTCAGTGTGGTATCAGGGTCCAGTACACCCC
21.00368  CCCAGATGATGACGCGCACCTCAGTGTGGTATCAGGGTCCAGTACACCCC
21.00369  TCCTGATGATGTGGGACAGCTCAGTGTGGTATCAGGGTCCAGTACACCCC
21.00370  TCCTGATGATGTGGGACAGCTCAGTGTGGTATCAGGGTCCAGTACACCCC
21.00371  TCCTGATGATGTGGGACACCTCAGTGTGGTATCAGGGTCCAGTACACCCC
21.00373  CCCTTATGATTGCCTACAGCTCAGTGTGGTATCAGGGTCCAGTACACCCC
21.00355  GCCTTTCGACTTCAGAGTTCTCGGCAGGGCACTAGGGACCAGCGCGCCC-
21.00356  --------------------------------------------------
21.00358  ACCTGATGACGAGGGACATCTCAGTGGGGCACCAGGGACCAGTGCACCC-
21.00359  AACATGTGAAGCGGGACACCTTAGTGTGGCACCAGGGACCAGTGCACCC-
21.00374  --------------------------------------------------
21.00376  CTCTGATGACGAGGGACACCTCAGTGTGGTACCAGGGCAGAGTACTCCC-
21.00377  CCCTGATGATGCGAGACACCTCAGCGTGGTATCAGGGTCCAGTACCCCC-
21.00378  CCCTGATGATGCAAGACACCTCAGCGTGTTATCAGGGTCCAGTACCCCC-
21.00345  CCCTGATGGCGGAAAGCACCTCAGCATGGTGTCAGGGCCAAGTTCACCC-
21.00348  CCATGATGACGAGGA-----------------------------------
21.00357  CCTTGATAACGGGGAACACCTCAGCGTGGCACCAGAGTCCAGTGC-CC--
22.00426  CCCCCATGACGCGGGGCACCACAGCGTGGCATCAGGGCCCAGCGCACCC-
22.00427  CCCTCGTGACGCGGGGCACCACAGCGTGGCATCAGGGCCCAGCGCACCC-
22.00429  CCCTCGTGACGCGGGGCACCACAGCGTGGCATCAGGGCCCAGCGCACCC-
22.00447  CCCTTTTAGCGATGG-----------------------------------
22.00464  ACCCTATGACCAGAA-------------------------AGCG------
22.00422  CCCTCGTAACGAGGGACACCGTAGCGGGGCATCTGGGTCCAGCGC-CCC-
22.00455  CCCTGAAGACGCCGGACGCCTCAGCGCGGCACCGGGGTCCAGCACTCCC-
22.00456  CCCTGAAGACGCCGGACGCCTCAGCGCGGCACCGGGGTCCAGCACTCCC-
22.00458  CCCTGAAGACGCCGGACGCCTCAGCGCGGCACCGGGGTCCAGCACTCCC-
22.00463  CCCGGAAAACGGGGG-CACCCTCGGGTGGCATCAGGGCCCAGCACAGCCC
22.00465  CCCTAATGACGTGAGACACCTCAGTGTGGCATCAGGGCCCAGCACAGCCC
22.00466  CCCTGATGACGTGAGATACTTCAGTGTGGCATCAGGGCCCAGCACAGCCC
22.00468  CCGTGATGGTGTGGGACAGCGGAGTGTTGAACCAGCCGGCCGAG-TCCCC
22.00419  TCCTGATGTAGGGGGACACCTCAGTGTGGCACCGGTGCCCAGTGCTT---
22.00420  CCCTGATGACGAGGGACACCTCCGTGTGGCATCAGTGCCCAGTACTC---
22.00424  CCATCATCACAAGGGACACCTCAGCGTGGCATCCGGACC-AGTGCTCC--
22.00432  CCCTCATGACGAGGGACACCTCAGCGTGGCATCACGGTCCAGTACTCCCC
22.00436  TCTTGACGTCGAGGGACATCTCCGTGTGGCATCAGAGTCCAGTA-ACCCC
22.00438  CCCTCATGACGAGAGACATCTCCGTGTGGCATCAGAGTCCAGTA-ACCCC
22.00440  CCCTGAGAACGAGCAACACCTCAGTGTCGTATGATAATTTAGGACACCCT
22.00441  TCCTAATGGCGTTG---ACCTCAGTGTCGTATGATAATTTAGGACACCCT
22.00446  CCCTCATGACGAGGGACACCTCAGCGTGGCATCACGGTCCAGTACTCCCC
22.00449  CCCTGACGATGATGCCCACCTTTTTGTGGTATTCAGGTCTCGTACA----
23.00376  CTCTGATGGTGTGGGACACCTCAGCGTGGTTTCCGCGTTCGCTGAACCCC
23.00339  CCTCGATGACGTGGGATACTGCAGTGTGGCGTCAGGTCCCAGTGCTCCC-
21.00360  TCCTGCTGAC-----GCGC-------------------------------
23.00344  CCCTCGTGACGGGGG-CGCCTCAGCACGGTATAAGGATCCAGTAC-CCCC
23.00352  CTCTCATGACGGGGGACACCTCAGCGTGGTATCGTGAACCGGCAC-CCCG
23.00369  TCCGGATGACGAGGCACACCGCAGCGTGGCATCAGGGCCCAGCACCCCCC
23.00370  TCCGGATGACGAGGCACACCGCAGCGTGGCATCAGGGCCCAGCACCCCCC
23.00372  CCCGGATGACGAGGCACACCGCAGCGTGGCATCAGGGCCCAGCACCCCCC
23.00373  CCCCGACAACGGGGGACACCGCAGCGTGGCATCAGGGCCCAGCACCCCCC
23.00374  CCCCGACAACGGGGGACACCGCAGCGTGGCATCAGGGCCCAGCACCCCCC
23.00323  GCCAGGGAACGAGAGCGATCTCGGCGTCGTATCACGCTCCAGCG-GCCC-
23.00331  CCCTGATGACGTGGGACACCTCAGTGTCGCTTCAGGGTGCCGTGTGCCCC
23.00333  CCCTGATGACGTGGGACACCTCAGTGTCGCTTCAGGGTGCCGTGTGCCCC
23.00335  GCTTGATGACGCGGGACATCTCAGGATGGCTTCAGGGTCCAGTGCGCCT-
23.00336  CCCTGATGACGCGGGACATCTCAGGATGGCTTCAGGGTCCAGTGCGCCT-
23.00338  CCCTTATGACGTGGGACGCCTCCGTGTGGCGTCAGAGCGCAGTGCGCCT-
21.00361  CTCTGAAGGCATGAGGCGCTGCAGGGCGGCTTCAGCGTCCAGTT------
21.00362  CCCTGTTTT-TTGGGCCATTTCATCTTGGGGCCAGCGC--ACCTCTCCC-
23.00345  TCCCGATGACGAGGTCCA-CTCAGCGTAGCATCAAGGT-TAGTG-ACCCC
23.00348  CCCTCATGACGGGGGACACCTCAGCGTGGTATCAGGCTCCAGTGC-CCCC
23.00349  CCCAGATGATGGGGGACACCTCAGCGTGGTATCAGGCTCCAGTGC-CCCC
23.00350  CCCTCATGACGGGGGACACCTCAGCGTGGTATCGTGAACCGGCAC-CCCG
23.00353  CTCTCATGACGGGGGACACCTCAGCGTGGTATCGTGAACCGGCAC-CCCG
23.00354  GCCTGATGCTGCCGGCCACCTTGGTGCGGCAT-AGGGACCAGTGC-CC--
23.00355  GCCTGATGCTGCCGGCCACCTTGGTGCGGCAT-AGGGACCAGTGC-CC--
23.00360  GCCTGATGGCGAGGGACACCTCGGTGTGGTGTCAGGGCCCAGTGC-CCCC
23.00361  GCCTGATGGCGAGGGACACCTCGGTGTGGTGTCAGGGCCCAGTGC-CCCC
23.00362  CCCTAATGACGAGGGACACCTCGGTGTGGTGTCAGGGCCCAGTGC-CCCC
23.00363  TTCTGATTATGGGGGGCTTCCAGGCGTGGTGTCAGGGCCCAGTGC-CCCC
23.00364  TTCTAATGATGGGTTACCCCTCGGTGTGGTGTCAGGGCCCAGTGC-CCCC
23.00365  CCTTGATGACGGGGGGAACCTCAGCTTCGTATCAGAGCCCACTGC-CCCC
23.00366  CCCGGATGACTAGGGACACCTCGGTGTGGTGTCAGGGCCCACTGC-CCCC
23.00367  ---------------ACACCGCAGCGTGGCATCAGGGCCCATCAC-CCCC
23.00357  CCCTGATGACGAG--CCACCTCAGCGTGGTGTCAGGGTCCAGTGC-CCCC
24.00472  TCCGGATGGAGTACGACACCTCAGCGCGGTTTCAGTGTCCGGTGCACCCA
24.00481  CCCACATGAGGACAGGCCCCACAGTGCGGTGTCAAGGTCCAGCGAACCAC
24.00483  CCC-AATGGCAGGGCGCCCCACAGTGCGGTGTCAAGGTCCAGCGAACCAC
24.00501  CAC-GATGGCGTGAACCACCACAGTC---CATCACGCTGGA-TGCACGCG
24.00507  CCCTGATCACG-GGGACACCTCAGCATGGCATCAGGGCGCAGTGAACCCC
24.00508  CCCTGATCACG-GGGACACCTCAGCATGGCATCAGGGCGCAGTGAACCCC
24.00509  CCGCGACGACGGGGGGCACCTCAGCATGGCATCAGGGCGCAGTGAACCCC
24.00510  CCGCGACGACGGGGGGCACCTCAGCATGGCATCAGGGCGCAGTGAACCCC
24.00470  AACTGATGACGAGGGACACTTCAGTGTGGCATTTGGGCTCAGCACACACC
24.00473  CCCTCGTGACGAGGGACACCTCAGCGTGGTATTTGGGCTCAGCACACACC
24.00474  CCCTGATGGCGAGGG-CGCCACAGTGCG--ATC-----------------
24.00476  CCCTGATGGCGAGGG-CACCACAGTGCG--ATC-----------------
24.00494  CCCGGATGACGAGGGACACCTCAGTGTGGTATCAAGGTCCCGTGCACCCC
24.00478  ACC-GATGGCGCGCGAAACCTCCGTGCAGTATCAGGGTCCAGAACTCCTC
24.00480  CCC-GCGGCC-GTCGGTCA-AAACTGTGTGTGTAGAG-------------
24.00487  CCTCCATCATAAGGGACCCCTCAGTGTGGTATCAGGGT-CAGTGCACCC-
24.00488  CCCCGATGAC-AGGGACCGCTTGGTGTGGTATCAGGGT-CAGTGCACCC-
24.00489  CTCTCACGGC--GGGACCCCTCAGTGTGGTATCAAGGGCCAGTGCACCC-
24.00491  CCCTGATGACGTGGGACGCCTCCGTGCGGTATCAGGGGCCAGTGCACCC-
24.00492  CCCTGCTGTCGTGGGACGCCTCCGTGCGGTATCAGGGGCCAGTGCACCC-
24.00493  CTCTCACGGCGTGAAACCCCTCAGCGTGGTATCAGGGGCCAGTGCACCC-
24.00499  CCCTGATGACGGGGGACACCTCAGCCTGGCGTCGGGGTCTAGTACCCCCC
24.00468  CCCTCATGTCGAGG-ATACCTTAGCGTGGTATCAGGGTTCAGCAC-CC--
24.00469  CTGTGATGGAGTTGGACACCTTAGCGTGGTATCAGGGTTCAGCAC-CC--
24.00484  TCCTGATGGCGAGGGACACCTCAGTGTGGTATCAGGGTCCAGCACACCAC
24.00485  TCCTGACTACGAGGAACACCTCAGTGTGGTAGCAGGGTCCAGCACACC--
24.00486  TCTTGATGGCACTAGACACCTCAGTGTGGTAGCAGGGTCCAGCACACC--
24.00502  ACCTCATGACG-G--CCACCTCCGTGTGGTATCAGGGCCCAGTGCTCC--
24.00503  CCCCGATAGCGGGGGACGCCTCAGCGTCGTATATATCTTCGG-AC-CC--
24.00504  CACTGATGACGGCGGACACCTCGGCGTGGCATTAGGGTCCACTAC-CCC-
24.00505  CACTGATGACGGCGGACACCTCGGCGTGGCATTAGGGCCCACTAC-CCC-
24.00506  CCCTGATGACACGGTACACCTCAGCGTCGTATATATCTTC-GGAC-CC--
25.00545  CCCTGGTGACAAGGGACACCTGAGTGCGGCTTCCCGGCCAAGTACTCCGC
25.00558  TCCTGATGACTGGGGCCGCCTCAGGGTGGTACCATGGTCGCGTGCTCCCC
25.00565  CCCGGATGACGTGGGACACCTCAGTGCCGTATCAGGGCCCCGGGCACCTC
25.00566  CCCGGATGACGTGGGACACCTCAGTGCCGTATCAGGGCCCCGGGCACCTC
25.00542  CCCTGATGACGTGGGCCACCACAGCGTGGCTTCCCGGCCAAGTACTCCGC
25.00543  CCCTGATGACGTGGGCCACCACAGCGTGGCTTCCCGGCCAAGTACTCCGC
25.00544  CCCTGATGACGTGGGCCACCACAGCGTGGCTTCCCGGCCAAGTACTCCGC
25.00551  CCCTGATCGCCGGGGACACCTCGGTGTCGTAGCAGCCTCCAGCGC-CC--
25.00552  GTCTCACGAAGAGGGACACCTCAGCGTACTATCAGGGGCCAGTGCGCCT-
25.00553  TCCTGCCGACAAGGG-CACCTCAGTGGTGGATCAGGGTCCAGTGCTCCCC
25.00559  ACC-GATG-C-TGGC-CTCCTCAGCGTGGCATCAGGGTTCAGTAC-CC--
25.00562  CCCTGAAGAAGTGGG---AACCATGGTGGTGTCGGGTTAGATGGCACCCC
25.00570  CCC-GATGAAAAGGGTAAGCCTTGTCGGGTCACAGGGCCCGGTGCGCCC-
25.00547  CCCTGACGATGTGGGACACCTGAGAGTGGTATGAGGGCCCGGTACACCC-
25.00548  CTCCGACGGGGTGGGACACCTGAGAGTGGTATGAGGGCCCGGTACACCC-
25.00549  CCCCGATGAC-TGGCACACGTCAGCGTGGTGTCATGCTCCAGTGC-CC--
25.00556  CTTGGATGACGAGGGCCGCCGCCGGGTGGTACCATGACCGCGTGCACTCC
25.00560  CCCTGATGACAGGGGACACCTCCGGGTGGCATCAGGGTTCAGTAC-CC--
25.00561  CCTTGACGA-GAGAC--ACCTCCGGGTGGTATCAGCGCTCAGCAC-CC--
25.00564  TTGGGATGACGAGGGCCCCTGCAGGGTGGTACCATGGTCGCGTGCACTCC
25.00567  CCTGGATGACGTGGGACACCTCCGTGTCATGTCAGGGCCCCCCTCCCCTC
25.00569  TCTTCATGACTTGGGGCAGCTCCGCGTCGTGTCAGGGCTCCGTGCACCCC
25.00571  CCCTCATGACGTGAGACAACTCAGCATCGTGTCAGGGCTCCGTGCACCCC
25.00572  CTCTGAAGACCAGG-ACACCTCAGCGTCGTGTCAGGGCTCCGTGCACCCC
25.00574  CACTGACGGCGAGGGACGCCTCAGCGTCGTCTCAGGGCTCCGTGCACCCC
26.00546  CCCTCACGACAACGTACACCTCAGCATGGCATCAAGTCCCAGTGC-CC--
26.00549  CCCTAACGACGGGCGGCATCTCCGTGTGGTATCAGGGTCAAGTGC-CCCC
26.00550  CCTTGAGGATGGGGGACATCTCAGCGTGGTATCTTGGCCCAGCGC-CTCC
26.00551  ATCTG-TGACGAGGAGCATCTCCGTGTGGTATCAGGGCCAAGTGC-CCCC
26.00552  CCC-GATGACGTGGGACATCTCCGTGTGGTATCAGGGCCAAGTGC-CCCC
26.00554  CCGTGACGAGGAGGGGCATCTCCGTGTGGTATCAGGGCCAAGTGC-CCCC
26.00564  CCTTCACGACGTGGGACACCTCAGTGTGGTGTCAGGGCCCAGTACACC--
26.00524  CCCTGATGAC-AGTG---C--------------------------ACCCC
26.00530  CGCAGATGGCGAGGTTCACCTG-------TG-GAGCCCCCATTCCTCCC-
26.00543  CCCTGATGAGGACAG---CCTCACCGTGGTATTAGGGGCTAGTA-C----
26.00560  CCCTGATGAAGAGCGGCACCTCCGTGTGGCGCCAGGGCGCAGTATGTCC-
26.00567  CCCTCAGTGCGCG------------GTGGTGTCAGGGCCCAGTACACC--
26.00569  CCCTCAGTGCGCG------------GTGGTGTCAGGGCCCAGTACACC--
26.00516  TTGTGAGTACGGTGGACCCCTCTGTGCGATATCAGACTCCGGTACTCCC-
26.00517  CTCGGATGATGAGAGGCCCCTTCGTGCGATATCAGACTCCGGTACTCCC-
26.00518  CCCTG-TGATGAACAACCCCTCTGTGCGATATCAGACTCCGGTACTCCC-
26.00520  CCCTG-TGACGAGAGACCCCTCTGTGCGATATCAGACTCCGGTACTCCC-
26.00523  CTGTGATGAAGAGAGACACCTCTGCGTGGTAACAGCGTCTGGTACTCCC-
26.00526  CCATCATGGCGAGGGACACATCAGAGTGGTGCCAGGGTCCAGTGCACCCC
26.00527  CCATCATGGCGAGGGACACATCAGAGTGGTGCCAGGGTCCAGTGCACCCC
26.00529  CCATCATGGCGAGGGACACATCAGAGTGGTGCCAGGGTCCAGTGCACCCC
26.00531  CCCTGATGACGACG-TCACCGCAGCGTGGCATCAGGATCCACTGCACTGT
26.00534  CTCTGATGACGTGCGTCGTCTCACTGTGGCGCCAGGGGCCAGTGC-CC--
26.00536  CCCTACTGACGAGGGACGCCTCACTGTGGCGCCAGGGGCCCGTGC-CC--
26.00538  CCCTCAAGACGGGGGACACCTCACTGTGGCGTCAGGGGCCAGTGC-CC--
26.00539  CTCTGGGGA-GAGGGGGGCCTCGCTGTGGCGCCAGGGGCCAGTGC-CC--
26.00540  CTCTGGGGA-GAGGGGGGCCTCGCTGTGGCGCCAGGGGCCAGTGC-CC--
26.00541  CTCTGGGGA-GAGGGGGGCCTCGCTGTGGCGCCAGGGGCCAGTGC-CC--
26.00544  CTGTGAAAAAGACTGTGGCTTTG--GTGGTGCTATGGTTCTGGGCGGGC-
26.00547  CCCTCACGACAACGTACACCTCAGCATGGCATCAAGTCCCAGTGC-CC--
26.00545  CCCTCACGACAACGTACACCTCAGCATGGCATCAAGTCCCAGTGC-C---
26.00548  CCCTCATGACGAAGG-AACCTTAGTGCGGCATCAGGGGTCAGTGC-CC--
27.00526  CAAGGATGGCGAGGGGGACCCCAGAGTCGTGTCAGCGTCCAG--CATCCC
27.00546  CCCTGATGATGAGGGACACCTCCGTGTGGCGTCACGGTTCCGTACTCCCC
27.00541  CCCTGGTGATGAGGGACACCTCCGTGTGGCGTCACGGTCCCGTACTCCCC
27.00544  CCCTGATGACGAGGGACACCTCCGTGTGGCGTCACGGTCCCGTACTCCCC
27.00545  CCCTGATGACGAGGGACACCTCCGTGTGGCGTCACGGTCCCGTACTCCCC
27.00510  CCATTCGGATGAGGGCCCCCTCAGTGTGGTGCCAGGGCCCAGTACACCCC
27.00511  CCCGGATGAGGAGTGACAACTCAGTGTGGTGCCAGGGCCCAGTACACCCC
27.00512  CCCGGATGAGGAGTGACACCTCAGTGTGGTGCTAGGGCCCAGCACACCCC
27.00514  CCGTTAGGACGAGTGACACCTCAGTGTGGTGCCAGGGCCCAGTACACCCC
27.00515  CCCTGATGAGGAGTGACACCTCAGTGTGGTGCCAGGGCCCAGTACACCCC
27.00516  CCGTGAGGACGAGTGACACCTCAGTGTGGTGCCAGGGCCCAGTACACCCC
27.00519  CCCGGATGATGAGACACTCCTCAGTGTGGTGCCAGGGCCCAGTACACCCC
27.00520  CCGTTAGGACGAGGGACACCTCAGTGTGGTGCCAGGGCCCAGTACACCCC
27.00522  ACTGCATGATGAGACACCCCTCAGTGTGGTGCCAGGGCCCAGCACACCCC
27.00525  CCCGGATAATGGGGGACC-CCCAGAGTCGTGTCAGCGTCCAGCA-TCCCC
27.00536  CCATAGTCACGTG--ACACCTCAGTGTGGTATCAGGGCCCAGTACACCCC
27.00538  TCCTGAGGACGACG-ACACCTCAGTGTGGTATCAGGGCCCAGTACACCCC
27.00543  TCCGGATGACGAGGGACACCTCCGTGTGGCGTCACGGTCCCGTACTCCCC
27.00547  CCCGGGTGACGAGGGACACCTCCGTGCGTCATCACGCCCCAGCGCCCCCC
27.00489  CCCCAATGACGAGGGACACCTCAGCGTGGTACCAGCGCCCAGTACACCCC
27.00490  CCGTCATCG-GCGGGTCGCCTCAGCGTGGTACCAGCGCCCAGTACGCCCC
27.00491  ACCTGCTGACGAGGGACACCTCAGCGTGGTACCAGCGCCCAGTACGCCCC
27.00492  CCCTCATGGCGAGGGACGTCTCTGCGTAATACCAGCGCCCAGTACGCCCC
27.00493  CCCTG-TGAGTGGGGACACCTCAGCGTGGTACCAGCGCCCAGTACACCCC
27.00494  --------------------T-TGCGTTTTATCGGCACCCAGTACGCCCT
27.00495  CTTTCATGACGGGGGACACCT-TGCGCTGTATCGGCACCCAGTACGCCCT
27.00496  TGCTGGAGACGAAG--CACCTCCGCGTTGTACCAGGGCCCAGTACACCCC
27.00497  CCCTGGT-AC-----TCA-CACTGCGTGGTACCAGCGCCCAGTACACCCC
27.00498  CCCTGCTGACGAGGGACACCTCAGCGTGGTACCAGCGCCCAGTACGCCCC
27.00500  TCGTGATGACGAAGGATAACTCAGCGTGGTACCAGCGCCCAGTACGCCCC
27.00501  CCCTGCTGACGAGGGACACCTCAGCGTGGTACCAGCGCCCAGTACACCCC
27.00504  TCCAGATGACGAGTGGCACCTCACCGTCGTCTCAAGGGGTCGAGGACCCC
27.00507  CTGTGACGATGAGGTACACCACAGTGTGAGGTCAGGCCCCAGTGCTCCCA
27.00527  CCCGGATGAAGAGGGGCACCGC-----------AGTGCCCAGTACTCCCC
27.00528  CCCGGATGAAGAGGGGCACCGC-----------AGTGCCCAGTACTCCCC
27.00529  CAAAAATGAAAATGC-----------------------------------
27.00533  CCCCGATAACATGGGACACCTCCGTGTGGTATCAGTGCTGAATACTCCC-
28.00598  GCCTG-TGACGAGTGAGACGTCAGCGCGGTATCAGGGCCGTTTG-G----
28.00602  CACGTATGTAGGGGGACACCTCAGTGTGGTATCAGGGTCCAGTA-ATGCC
28.00572  TCGTGATGACGAGGGGCACTC-AGGGTGGTATGAGGACCCAGC-CGC---
28.00583  CACTCATGACGCGGGCCACCTCAGCGTGGCATCAGGGCACAAGGCACTCT
28.00604  CCCCGATGACGTGGGGCACCTCTGTGTCGTGTCTGGGCCCAGTGCACTCT
28.00613  CCCCGATC-C-----TTAT----------CATGAGTGCCGCGTACACCCT
28.00615  CCCTGATGACG-G--TTATCTCCGTCTGCTGTGAGTGCCGCGTACACCTT
28.00616  CCCTGATGACG-G--TTATGTCCGTCTGCTATGAGTGCCGCGTACGCCCC
28.00617  CCCTCATGACGAGGGACACGTCAGCGTGGCGCCAGGGTACCGCACACCCC
28.00619  CCCTCATGACGAGGGACACGTCAGCGTGGCGCCAGGGTACCGCACACCCC
28.00620  TCCTGATGA-GAGGGACACGTCAGCGTGGCGCCAGGGTACCGCACACCCC
28.00574  CCCCGATGCCGAGGGCCACCTCAGCGTGGCATCAGGGCACAAGGCACTCT
28.00577  CCCTCATGATGTGTT-----------------------------------
28.00578  TCCTCATGACGCGGGCCACCTCAGCGTGGCATCAGGACACAAGGCACTCT
28.00579  CTCTCATGACGCGGGCCACCTCAGCGTGGCATCAGGACACAAGGCACTCT
28.00580  TCCTCATGACGCGGGCCACCTCAGCGTGGCATCAGGACACAAGGCACTCT
28.00585  CCCGGACGGCGAGGGACACCTCAGCGTGGCATCAGGGTCCAGTGCTGCTC
28.00586  CGCCG-TGAA-AG------CTCATGTTGTAAT-ACGGT---GTTCACTTG
28.00587  CCCCGGGGACGAGGGCCACTTTAGGGTGACATCACTGCCCACTGCTCCCC
28.00588  CCTCGATACCGACGGACACTTTAGCGTGGTGTCACTGCCCACTGCTCCCC
28.00594  TCCTGACAACGGGGGGCGTCTCTCCGTGGTATGAGGGTCGAGTA-GCTC-
28.00599  CCCTAATAGCGCGGGCCACCCCGGCGTGGTATCAGGGCCCCGTGCACCCC
28.00600  CCCTAATAGCGCGGGCCACCCCGGCGTGGTATCAGGGCCCCGTGCACCCC
28.00601  CCCTAATAGCGCGGGCCACCCCGGCGTGGTATCAGGGCCCCGTGCACCCC
28.00605  CCCTGAGTGCGAGGGACATCTCTGTGTCGTGTCTGGGCCCAGTGC-CC--
28.00607  CCCTGATAACGGGGGACACCTCATCGTGGTATCAGGGTCCAGTAC-CC--
28.00609  CCATGATGGC---GG-CACCTCATCGTGGTATCAGGGTCCAGTAC-CC--
28.00611  CCCTGATAACGGGGGACACCTCATCGTGGTATCAGGGTCCAGTAC-CC--
28.00612  CTCCGATGACGTGGGACATCTCTGTGTCGTGTCTGGGCCCAGTGC-CC--
29.00549  TTCTG-TGGGGAGGGACACCTCCGTATGGCATCAGGGTTCAAGACCCCCC
29.00551  CCATGATGCCGAGGGATGCCTCAGCAGGGTATTGGGGTGCTGCACTCCC-
29.00592  CGCTGATGGCTAGGGACACCTCCGTGTGGCATCAGGGCCCAGTACACCCC
29.00528  CCATGATCATGAGG-ACGCCTCCGCGCGGTATCAGGGCCCAGTGCACCTC
29.00537  ACCTCATGACGTGGGGGATCTCAGCGTGGTATCGCGGTCCAGTCCACCAC
29.00540  CCCTGAAGGCGTGGGGAAGCTAAGCGTGGTGCCAGGGTCCAGTGC-CG--
29.00541  CCCCGATGACGAGGAGCACCTCAGTGTTGTGTCAGGGTCCAGTGC-CG--
29.00542  TTCTGAAGAGGAGGGACACCTAAGCGTTGTGCCAGGGTCCAGTGC-CG--
29.00544  TAATCAGGAGGATGGGCACCGAAGCGTGGTGTCAGGGTCCAGTGC-CG--
29.00545  CCCTTAAGGCGTGGGGAAGCTAAGCGTGGTGTCAGGGTCCAGTGC-CG--
29.00546  TCCTCATGACGAGGGGCACCTAAGCGTTGTGTCAGGGTCCAGTGC-CG--
29.00547  TTCTGACGACATCGGATACCTCAGTGCGGCATCACGCGCCCGTT-TACTC
29.00566  CCCAGATGAAGCGGGACACCTCAGCGTGGTATCAGCGCCCCGTACCCTC-
29.00567  CGCTGGTGACGGGGGACACCTCAGCGTGGTATCAGCGCCCCGTACCCTC-
29.00568  TTCTGATGACGAGAGTCAGCGCAGCTTGGCTCCAGGACCCGGTGCAGCC-
29.00569  CGCTGATGATGAGGGGCCCCTCTGTGTGGTATCAACCTCCCGTACCCTC-
29.00581  AATTGGTGATGTGGGACACCTCCGTGTGGCATCAGGGCCCAGTACACCCC
29.00583  CCCTGGTGACG-GGGACACCTCCGTGTGGCATCAGGGCCCGGTACACCCC
29.00584  TCCTGACGACGACGGACACCTCCGTGTGGCATCAGGGCCCGGTACACCCC
29.00588  AATTGGTGACGGGGGACACCTCCGTGTGGCATCAGGGCCCAGTACACCCC
29.00590  CCGCGA-GAGGAGGAACACCTCCGTGTGGCATCAGGGCCCAGTACACCCC
29.00595  CCCTGATGACGGGGGACACCTCCATGCGGTACCAGGGCC-AGTGCACCCC
29.00597  CCGTGATGACGGGGGACACCTCCATGCGGTACCAGGGCC-AGTGCACCCC
29.00600  CCCTACTGACGAAGA-TATTTGAGTTTGGTATTTGGGTCCAGTGCACCCC
29.00601  GCCTAATTACGAGGGACAACTCCATGCGGTACCAGGGCC-AGTGCACGGC
29.00602  CCCCGATGACGAGGGACACCTCCATGTGGTACCAGGGCC-AGTGCACCCC
29.00525  CCCTCCGTGCGGGACTCGCCTCAGCCCAGCGTCAGGGTCCAGTA-GCCCC
29.00527  CCCTCCGTGCGGGGCTCGCCTCAGCCCAGCGTCAGGGTCCAGTA-GCCCC
29.00529  CCATGATCATGAGG-ACGCCTCCGCGCGGTATCAGGGCCCAGTGCACCTC
29.00530  CCATGATCACGAGG-ACGCCTCCGTGCGGTATCAGGGCCGACGGCT----
29.00533  CCCTGATGGGGAGGGACGCCTCCGTGCGGTATCAGGGCCGACGGCT----
29.00553  CTCTGATGACGAGGG-CACCGCAGTGTGGTATCAGGCTCCCGTGCACCCC
29.00565  CCCACATGATGCGGGACACCTCAGCGTGGTATCAGCGCCCCGTACCCTC-
29.00571  CCCTGATGACGAGG-TCACCTCAGTGTGGTATCAGGGTCCTGTACACCT-
29.00576  CCCAG-TCACGAGG-ACACCTCCGTGTGGCATCAGGGTCCGGTGCCTCC-
29.00578  CCCAG-TCACGAGG-ACACCTCCGTGTGGCATCAGGGTCCGGTGCCTCC-
29.00580  -------------------ACCACCGTGGCATCAGGGTTCGGTGCCTCC-
29.00591  CCCGGACGATGGCGGACATCTCCGTGTGGTACCAGGG-CCAGTGCACCCG
29.00593  CCCCGATGGTGGGGGACATCTCCGTGTGGTACCAGGG-CCAGTGCACCCG
29.00596  CCCTGATGGCGGGGGATACCTCAGCGTGGTATCAGGGCCCAGTAC-CC--
29.00598  CCC-GGTGACGAGGGACACCTCCGTGTGGTACCAGGG-CCAGTGCACCCC
29.00599  CACGGACGACGAGGAACAGCTCAGTGCGGTACCAGGACCCAGTGCACCCC
29.00606  CCCCGCTCACGAGGAACTCCTCGGTGTCGCATCAGGGTCCAGCACTCAC-
29.00607  CCCCGCTCACGAGGAACTCCTCGGTGTCGCATCAGGGTCCAGCACTCAC-
29.00609  CCCCGCTCACGAGGAACTCCTCGGTGTCGCATCAGGGTCCAGCACTCAC-
30.00569  TCCGGATGGCGGGGGATGCCGCAGTGTGACACCAGGGCCCAGTGCCCCCC
30.00576  TCCTGATGACAGGTGACACCTCAGTGTCGCTCCAGGGTCCCGCACGACCC
30.00586  ACCTGACGACGGGGGACACCTCAGTGTCGTACCGGGGTCCAGCACACGG-
30.00587  GCCTCATCACGGGGGACACCTCAGTGTCGTACCGGGGTCCAGCACACGG-
30.00588  CCCTGATGATGTGGGACACCTCAGTGTCGTACCGGGGTCCAGCACACGG-
30.00589  CCCTGATGATGTGGGACACCTCAGTGTCGTACCGGGGTCCAGCACACGG-
30.00590  CCCTGATGATGTGGGACACCTCAGTGTCGTACCGGGGTCCAGCACACGG-
30.00591  CCCTGATGATGTGGGACACCTCAGTGTCGTACCGGGGTCCAGCACACGG-
30.00592  CCCTGATGATGTGGGACACCTCAGTGTCGACCCGGGGTCCAGCACACGG-
30.00593  CCCTGATGATGTGGGACACCTCAGTGTCGTACCGGGGTCCAGCACACGG-
30.00599  TACTGATGCCGAGGAACACCTCAGTACGGTATCAGGGTCCAGTGTGCCCT
30.00600  CCCTAATGAGGAGGGACAGCTCCACGTCGTATCAGGGTCCAGTGTGCCCT
30.00607  TCCTAATGAGGAGGGACAGCTCCGTGTTGTATCAGGGTCCAGTGTGCCCT
30.00612  CACTGATGCCGAAGGACACCTCCGCGTGGTATCAGGGCTTTGTG-CACCT
30.00558  CCCTGATGACGGGGGACACCTCAGCGTGGCGCCAGGGGCCAGCGC-CCCG
30.00559  CCCTGATGACGGGGGACACCTCAGCGTGGCGCCAGGGGCCAGCGC-CCCG
30.00571  CGCCGATGCC--GGG---C-GCAGAGCGCTGTC-----CCCTTCC-CC--
30.00573  TCCGGATGACGAGGGACACCTCAGTGTCGCATCAGGGTCCCGCACGACCC
30.00574  CCCGCTTGACGAGGGACACCTCAGTGTCGCATCAGGGTCCCGCACGACCC
30.00575  CCCGGATGACGAGGGACACCTCAGTGTCGCATCAGGGTCCCGCACGACCC
30.00578  CCCTGATGATGTGGGACACCTCAGTGTCGTACCGAGGTCCAGCACACGG-
30.00594  CCTTGTCAGTG-GGGACACCTCAACGTGGTATCATGACCCTGTAC-CC--
30.00596  CCC-GATGACGGGGCACACGTCAGCGTCGTATCAGGGCCTAGTGCACCCC
30.00597  CCATCATGACGGGGCACACCTCGGCGTCGTATCAGGGCCTAGTGCACCCC
30.00598  CCCTGATGCCGAGGACCACGTCAGCGTCGTATCAGGGCCTAGTGCACCCC
30.00602  ACC-GTTTTTGCGGGACTCCTCAGTACGGTATCAGGGTCCAGTG-TGCCC
30.00604  CCCTAACGAGGAGGG-CAGCTCCGCGTCGTATCAGGGTCCAGTG-TGCCC
30.00605  CCCTAACGAGGAGGG-CAGCTCCGCGTCGTATCAGGGTCCAGTG-TGCCC
30.00608  CCCCGTAG-CGGGGGCCACCTCCGCGTCGTATCAGGGTCCAGTG-TGCCC
30.00613  GCCTGAAGAAGCGGTAAAGCTCAGTGTGGCATCAGGGCCCGGTGCACCCC
30.00621  GCCTGATGGCGAGAGACGCCTCTCAGTGGCATCAGGGTTCCGTGCCCTC-
30.00622  CTCTGATGACGAGGCACGCGCAATGTGGCGTCCATGGCCCCGAGCAGCCC
30.00556  CCCTGGCGATGAGACACACCGCTCAGCTTGGCCAGGGCCCCTTGCACTCC
30.00562  CCCAGATGACGGGGGGCGTCTCAGCGTGACATCAGGGCCCAGTGCCCCCC
30.00563  CCCAGATGACGGGGGGCGTCTCAGCGTGGCATCAGGGCCCAGTGCCCCCC
30.00565  CCC-GATGACGGGGGATGCCGCAGCGTGGCATCAGGGCCCAGTGCCCCCC
30.00566  ACCGGATGACGGGGGATGCCGCAGCGTGGCATCAGGGCCCAGTGCCCCCC
30.00568  TCCGGATGGCGGGGGATGCCGCAGTGTGACACCAGGGCCCAGTGCCCCCC
30.00570  GCCGGATGACGGGGGATGCCGCAGTGTGACACCAGGGCCCAGTGCCCCCC
30.00595  CCCTGGTGACGTTGGACACCTCAGTGCGGAATCAAGGTTCAATGC-CCTA
30.00619  TCCTCATCACGGGGGACGCCTCAGTGTGGCATCAAGGCGCGGTGCAGCCC
30.00620  CCC-GGTGACGGGGGACACCTCAGTGTGGCATCAAGGCGCGGTGCACCCC
30.00625  CACTGATGACGAGGCACGCCGCAATGTGGCGTCATGGCC-----------
30.00626  CCCTGATGACGAGGCACGCCGCAATGTGGCGTCATGGCC-----------
30.00627  CCCTGATGACGAGGCACGCCGCAATGTGGCGTCATGGCC-----------
30.00630  CCTTGATGACGAGGCACGCCGCAATGTGGCGTCATGGCC-----------
30.00631  CCTTGATGACGAGGCACGCCGCAATGTGGCGTCATGGCC-----------
30.00632  CCCCGAGGGCGAGGGACACCTGAGTGTGGTATCAGGGTCCAGTGC-CTCG
30.00634  CTCCGAGGGCGAGGGACACCTGAGTGTGGTATCAGGGTCCAGTGC-CTCG
30.00636  CCTTGATAACGAGGGACACCTGAGTGTGGTATCAGGGTCCAGTGC-CTCG
30.00643  CCATGATGACGAGAAA-ACCTTAGCGTGTCATCAGGGTCCAGTTC-CCC-
31.00645  CGCTGACGACGAGGGGCACTGCAGCGTGGTACCAGGGCCCAGTGCACCCC
31.00646  CGCTGACGACGAGGGGCACCGCAGCGTGGTACCAGGGCCCAGTGCACCCC
31.00657  CCCTGGGGACAAGGG-----------------------------------
31.00658  CCCTG-GGACGAGGGACACCTCAGTGTGGCATCAGGGTCCAGCGCACCCC
31.00659  CGCTGGTGAC-AGGGCTGCGTCAGTGCGGTATCGTTGTCCAG--CACCCC
31.00690  CCGTAATCACG-GGGTCACCTCGGTGTGGTATCACGGCCCAG--CACCTG
31.00695  GCCTAACGCAGAGGGGTACCTCGGTGCGCGGCCACGGCGCAGTGCACTCG
31.00696  CAATCACGGAGAGGGTGCCGCCGCTGCGCGGTCACGGCCCGGTGC-CCC-
31.00606  CCCTG-TGGCGCGG-ACCCGTCAGCGTGGAATGGAGTCCCA-TACTCCC-
31.00621  CCCCGATGATGAGGGACACCGCTGTGTCGTCTCAGGGTGTAGTGCACCCC
31.00622  CCCCGATGATGAGGGACACCGCTGTGTCGTCTCAGGGTGTAGTGCACCCC
31.00623  CTCTGTAAGCGGGGTACACCTCAGTGTCGTCTCAGGGTGTAGTGCACCCC
31.00678  TCCTG-TGACGAGGGACACCTCAGTGTGCTATCAGCGCCCACTACACCCG
31.00679  CCTTGGTGACGAGGGACACCTCAGTGTGCTATCAGCGCCCACTACACCCG
31.00618  CCCTG-TGAAGGGGGACACCTCAGTGTGGTATCAGGGCCCAGTGCACCAC
31.00632  CCCTGATGACGAAGGACACCTTAACGCGGTATCAGTCTCCAGTGCCCCCT
31.00639  CAAATACAACGAGTGACACTTCAGTGTGGTATCAGGGT-CAGTGCACCCC
31.00642  CCCT-ACGACGAGTGACACTTCAGTGTGGTATCAGGGT-CAGTGCACCCC
31.00643  CCCTGACAACGAGTGACACTTCAGTGTGGTATCAGGGT-CAGTGCACCCC
31.00650  ACTTCATGATGAGGGACACCTCAGTGTGGCATCCGGGTCCAGTGCACTCC
31.00677  CCCTG-TGACGGGGGACACCTCAGCGTCGTATCAGCGGCTGGTACACCTC
31.00684  ACCAGCGGATGTGTGACACCTCAGTGTGATATCAGGGTCCAGCGCTCCCC
31.00685  ACCAGTGGATGTGTGACACCTCAGTGTGATATCAGGGTCCAGCGCTCCCC
31.00688  CACGGAAGACGTCAG--ACCTCCGTGTGGTATCAAGGGCCAGTGCCCCTC
31.00698  CCCTGATGGCGAGGGGCACCCGTGCGCGGTGTCGGTGTCAGTTGCCCCCG
31.00701  CCCCGATGGCGAGAGACACCTCAGCGTGGTGTCAGGGCTCAGTACCCCCC
31.00703  GCCTAATGGC-AGGCACACCTCAGCGCCGTCTCAAGGTCCGTTGCCCCCG
31.00707  TGCTGATTGAGATGCTCATC-CTCTTTTTTTTCAAGGCTTCTCTCTCGTC
31.00708  CACCGATGGGGAGGGACACCTCAGTGCGGTACCAGGGTTCAGTGCACCTT
31.00709  CAC-GATGGGGAGGGACACCTCAGTGCGGTACCAGGGTTCAGTGCACCTT
31.00710  CCCTGACAACGAGAGACACCTCAGCGTCGCAT-AGGGTCCAGTA------
31.00610  TCCTGGTGACGCGAGGCACCGCAGCGTGCTAGCAGGGCCCAGTGCAGCC-
31.00614  CCCAGATAACG-GGGACACCAGTGTGCGTCATCAGGGTCCAGCACCCCCG
31.00616  CCCAGATAACG-GGGACACCAGTGTGCGGCATCAGGGTCCAGCACCCCCG
31.00617  TCCTGATGACG-GGGACACCAGTGTGCGGCATCAGGGTCCAGCACCCCCG
31.00626  TCCTCATCCCAAGGGACTCCCATGCACGGTATCAGGATCCAGCGCACCTC
31.00634  CTCTGAGG-CGAGGCATCCTTGTGGCTGTTATAAGGGTTCAGTGCCCCCT
31.00637  CCACGACGAAGGGGGACATATCCGTGTCGTATCAGTCTCCAGTGCCCCCT
31.00652  ATCTCATAGCGGGGGACGCCTCAGCGTGTTATCAGGGTCCGG--CACCG-
31.00654  CGATGAGTCCGAGGGGCACCTCGGTGTGGTATCAGGGTCCAGCGCACCCC
31.00655  CCCTGACGGC-AGGGACACCTCAGCATGGCATCAGGGTTCAGCGCACCCT
31.00656  CACAGAGCGCAAAGG---TCCTAACATGGCATCAGGGTCCAGCGCACCCT
31.00662  GCCTCATAAGGAGGGCTGCGTCAGTGCGGTATCGTTGTCCAGCAC-CCC-
31.00666  CCCCGATGATGGGAGACACCGCAGTGCATCATCAGGGCTCAGTACACCG-
31.00665  CCCTCATGACGAGGGACACTTCAGTGCATCATCAGGGCTCAGTACACCG-
31.00668  CCCTCATGACGAGGGACACTTCAGTGCATCATCAGGGCTCAGTACACCG-
31.00671  CCCTGACGACGTAGG-CACCCCAGTGTGGCATCAGGGTCCACTGCGCCG-
31.00673  AGCTGACGGAGAGGGACACCTCAGCGTCGTATCAGCGGCTGGTACACCTC
31.00675  TCATGATGAGGGCGCACACCTCAGCGTCGTATCAGCGGCTGGTACACCTC
31.00691  CCCTGATGACGAGGGCCGCCTGAGTGTGGCATCAGGGACCAGTGCCCCTC
31.00694  TCTTCATGACGAAG-ACACCTCCGTGCGGTATCAAGGGCCAGTGCCCCTC
31.00664  CACTGATGGTGGGGGACCTCTCAGTGTGGTGCCAGCGTCCAATACACTCC
32.00749  CCCGGATGGCGAGGGACACCTCTGTGTCGCATCAGCGTTTCGTAC-CGCT
32.00750  TCCTGATG-----GGACACCTCTGTGTCGCATCAGCGTTTCGTAC-CGCT
32.00752  TTCTGATG-----GGACACCTCTGTGTCGCATCAGCGTTTCGTAC-CGCT
32.00754  CCCTGATCACGACGCCCACGTCATCATGCTGACAGAGCCCAGCGCTCCCC
32.00755  CCCTCATGACG-GGCCCACGTCATCATGCTGACAGAGCCCAGCGCTCCCC
32.00768  TCCTGGTAACGGGGG--ACATCTCCCTGGCGTCGCAGTCTAGCACACCCC
32.00788  ACATACTGATGCGGGGCGCTCGATGGTGGCATTGGGGTCCACTGC-CGT-
32.00730  GCTTGATGAAGGGGGAGACCTCCGTGTGGTGTCAGGGCCCAGTACCCCGC
32.00731  CCCGGAGGACGAGGA-TAACTGCGTGTGGTGTCAGGGCCCAGTACCCCGC
32.00737  TCCTCTTGACGAGGGACACCGCAGTGTGGTATCAGGGGTCTG--CACCCC
32.00738  CCCTCCTGACGAGGGACACCGCAGTGTGGTATCAGGGGTCTG--CACCCC
32.00741  CCCTCCTGACGAGGGACACCGCAGTGTGGTATCAGGGGTCTG--CACCCC
32.00745  CCCTGGTGACGAGGGATACGTCAATGTGGTATGAGGGTTGGTGAC-CCCC
32.00746  CCCCG-TCACGGGGGATACGTCAATGTGGTATGAGGGTTGGTGAC-CCCC
32.00756  CCCTCATGACG-GGCCCACGTCATCATGCTGACAGAGCCCAGCGTCCCCC
32.00757  TCCTGATGACGATGGACCCTTCAGTAGCGTGTCACAGTCCACTACACTC-
32.00761  CCCTGATGACGAGGGCTACTGCAGTTCCGTACCACGGTCCAGCACACTC-
32.00769  CGCCGATGAAGAGAGAGACCGTAGTGTGGCGTCAGGGCCCAGTACACCTC
32.00771  TATTGATGGTGAGGCAGT-CTCTATGTGGTATCCGGTTTCACTAC-CCAC
32.00772  TTCTCATGACGACGGTCACTCCAGTGTGGTATCCGGTTTCACTAC-CCAC
32.00773  CCATCATGACGACGGTCACCCCAGTGTGGTATCCGGTTTCACTAC-CCAC
32.00775  CTCTTATCACGAGGTAAAACCCAGTGTGGTATCCGGTTTCACTAC-CCAC
32.00776  CCC-GAAGGCGGGGGACATCTCCGTGTGGTGTCACTGCCCAGTGCACCCC
32.00777  CCC-GAAGGCGGGGGACATCTCCGTGTGGTGTCACTGCCCAGTGCACCCC
32.00782  CCCTGAT--CAGGGGACACCTCAGCGTGGCATCAGGGTCCAGTGCACTCC
32.00783  CTCTA-TGACGAGGCATACCTGAGTGTGGCATCAGGGTCCAGTGCACTCC
32.00801  --------------------------------------------------
32.00803  AACTGATGACAGATGACACACTAGCGGGGTGGCAGGGTGCAGTGCATCCC
32.00724  TCCTAACGATGGAGGACACCTCAATGTGATGCCAGGGCCCACGACTCT--
32.00725  CACAAATGACGGGGGGCACCTCAATGTGATGCCAGGGCCCACGACTCT--
32.00726  TCCAAATGATGAGGGACACCTCCATGTGGTATCCGGGCCCAGTACGCCC-
32.00727  GCTTGATGATGAGGGACACCTCCATGTGGTATCCGGGCCCAGTACGCCC-
32.00728  CCTTGACGGCGTGGGGCGCCTCCATGTGGTGTCAGGGCCCAGTACGCCC-
32.00729  CCCGGATGACGTGGGGCGCCTCCATGTGGTGTCAGGGCCCAGTACGCCC-
32.00732  CCCTGCTGACGGGGGAGACCTCGATGTGATATCAGATTCCAGTGC-CCC-
32.00735  CCCTGCTGACGGGGGAGACCTCGATGTGATATCAGATTCCAGTGC-CCC-
32.00743  ACCTGAAAACGGGGGACACCGCAGTGTAGCATGACGCTCCAGTA--CCC-
32.00758  GCCTGATGACAACGGACACCTCAGTGTGGTGTCATGGTCCAC-ACACACA
32.00760  CCCTGATAAGGAGATACAACTCGGTGTGATGTCAGGGTCCCGTGCACCCC
32.00763  CCCTGGTGACGCGGGACACCTCCGTTCGGCATTCGGGTTCCCTA------
32.00764  CTCCGCTGACGGGGGACATCTCAGTGCCATATCAGGGTGTCCTACACCTC
32.00765  CTCCGCTGACGGGGGACATCTCAGTGCCATATCAGGGTGTCGTACACCTC
32.00766  CTCCGCTGACGGGGGACATCTCAGTGCCATATCAGGGTGTCCTACACCTC
32.00767  CCTTGGTGGCGGGCGATATCTAAGTGCGGTATCAGGGTACAATA--CG--
32.00779  CCC-GAGAACGAGGTGCGCCTCAGTATGGCATCACAGCCCAGCGCTTCCC
32.00780  CCG-GACGACGAGGTGCGCCTCAGTATGGCATCACAGCCCAGCGCTTCCC
32.00787  CCCT-ACGCGGAGGG-CACTTTGGTGTGGTGCCAGGGTCCCCTACTC---
32.00790  CTGTGATGACGAGGGGCATCTCGGTGCGGCATCAAGGCCCAGCACACCC-
32.00791  CTGTGATGACGAGGGGCATCTCGGTGCGGCATCAAGGCCCAGCACACCC-
32.00794  CCCTGGTGATGCCGGTCAACGCGGCGTGGTACGAGG-TCCCGTACAACCC
32.00800  TCCTGATGACGCGGGGCACCTCCGTATGGCATCAGAGCCCCGTACATCCC
33.00728  CCCTCATAACGACGGGCACCTCGGTGTGGCAGCAGGGCCCAGTACACACG
33.00744  CCCTGATGGCGTGGGGCACCTCCGTGTAGTATGAGCCTCCAGTGCACC--
33.00770  CCCTGATGGTGTGGGACACCTCAATGCGGCATCGTGGTCCGGCGC-CCC-
33.00771  CACTG-TGATGAAGGGCACCTCAATGCGGCATCGTGGTCCGGCGC-CCC-
33.00785  CTCTCACAACGAGGGACAACTCTGTGCGGTACCACGGTCCAATGCACTCC
33.00787  CCCTCACAACGAGGGACAACTCTGTGCGGTACCACGGTCCAATGCACTCC
33.00791  CCCGCACGGCGAGGGACAACTCTGTGCGGTACCACGGTCCAATGCACTCC
33.00805  CCCTGATGACGAGG-TCGTCTCAGTGTGGTAGCAGGTTCTAGTAC-CCTC
33.00798  GCCTGATGGC-AGCGCCACCAACGTGTGCTATCAGGGTCC-GTTAATCCA
33.00809  CCCTCATGGCGACTATCCATGTCGCGTGCTATCAGATCGTTACC-AT---
33.00714  CCCTGATGATTAGG-ACACCCCAGTGTGATATCGGTGCTCAGTACACCCC
33.00723  TCCTCATGGTGTGTGACGCCTCGGTGTGGCAGCAGGGCCCAGTACACGCC
33.00726  CCGTGACGGCGACG-ACGCGTCGGTGTGGCAGCAGGGCCCAGTACACGCC
33.00729  CCCTG-TGATGACGGACACCTCGGTGTGGCAGCAGGGCCCAGTACACGCC
33.00730  CTTTCATGACGACGGACGCCTCGGTGTGGCAGCAGGGCCCAGTACACGCC
33.00731  ACCCGATGACGGTGTACGCCTCGGTGTGGCAGCAGGGCCCAGTACACGCC
33.00733  CCCTGATGACGACGGACACCTCGGTGTGGCAGCAGGGCCCAGTACACGCC
33.00736  CTCTGACGATGTGGGGCACCCCAGTGTGGCGTCAGGGCCCAGCGCTCCCC
33.00745  CCCTAAGGACGGGGGACACCTCTGTGTGGTACTGCCGCACAGCCCACTCC
33.00749  CCTTGGTGAAGCGGGACACCTCCGTGCGGCATCAGGGTCCAGTAAAACC-
33.00768  CCCTGATA--GTGGTGCGCCTCAGCGTGGTAACATGACCCTGTAC-CT--
33.00774  CCCTGATG--GTGGGGCGCCTCGGCGTGATATCAGGGACCAGTAC-CCCC
33.00788  CTCTGCTG-TGGTCGACACCTCGGTGTGGTATCAGTGGCTAGTACTTCCC
33.00813  TTCATATGAC-----CCACTTCGGTATGGTATCAGGGGCCAGCAC-CCCA
33.00716  CCCTGATGATGTAAGACACCTCAGTATGGCATCGGTGT-CAGTACACCCC
33.00717  GCCTCATGGCTAGGGACACCCCAGTGTGATATCGGTGT-CAGTACACCCC
33.00718  ACCTGATGATGTAGGACACCCCAGTATGGCATCGGTGT-CAGTACACCCC
33.00722  CAC-GATGACGAGGAAAACCTCAGTATGGCATCGGTGT-CAGTACACCCC
33.00737  --------------------------------------------------
33.00740  CACCGACGACGTGTGGCACCCCAGTGTGGCGTCAGGGCCCAGCGCTCCCC
33.00741  CCCCGGTGACGAGGGGCACCCCAGTTTGGCGTCAGGGCCCAGCGCTCCCC
33.00742  CACCGACGACGTGTGGCACCCCAGTGTGGCGTCAGGGCCCAGCGCTCCCC
33.00746  CCCTGATGGGGAGGGAGACCTTGCGGTGGCATCTTGATTCCGTACTCTCT
33.00747  CCCCGATGACGAGGGGCACCTCGAGGTGATATCAGGTTCCAGCACACCC-
33.00756  CCCTGATGACGGCGTGCGCCTCGGCGTGCTCTTGGGGTCGATC-CTC---
33.00759  CCCTGATGACGTGGG----GGGGGATTGCATGCAGCACCCAGTCCAATGC
33.00761  CCCTG-TAGCGGGGGGGGCGCCGGAGCGGCATCAGGGTCCAGTAC-CCCC
33.00762  CCCGGATGA-AAGGGGCACCTCGGCGTGATATCAGGGTCCAGTAC-CCCC
33.00764  CCCTGATGGTGGGTGGCGCCTCGGCGTGATATCAGGGTCCAGTAC-CCCC
33.00766  CCTTGGCGACGGGGG-CACTGCGGCGTGATATCAGGGTCCAGTAC-CCCC
33.00767  CCCTGATAGTGTTGG-CGCCTCGGCGTGATATCAGGGTCCAGCAC-CCCC
33.00769  CCGTGCTTAAGTGGGACACCTCAGCGTGGTAACATGACCCTGTAC-CT--
33.00781  TACTGATGACG-GGGACACCTCAGTGTGGCACCAAGCGCCAGTGCACCCT
33.00782  CCCTGATGACG-GGGACACCTCAGTGTGGCACCAAGCGCCAGTGCACCCT
33.00783  CCCTGATGACG-GGGACACCTCAGTGTGGCACCAAGCGCCAGTGCACCCT
33.00806  CCCTGATGACGAGAGACACCTCAGCGTGGTATCATGGCCGAGAACTC---
33.00812  CCCTCATGACGAAGGACACCTCAGCGTGGTATCAGGGGCCAGTACACA--
33.00816  CCCTCATGACGAAGGACACCTCAGCGTGGTATCAGGGGCCAGTACACA--
33.00734  CCCTGATGACGGGGAACACCTCCGTGTGGTATGAGAGTACAGTGCCCCCC
33.00735  CCTTACTGACGGGGGAAACCTCGGTGTGGTATGAGAGTACAGTGCCCCCC
33.00765  CCCGGATGA-AAGGGGCACCTCGGCGTGATATCAGGGTCCAGTACCCCC-
34.00789  CCCTGATGACGAGGGACACCTCAGTGTGGTGTCAGGGCCCAGCAC-CCCT
34.00791  TCCTGACGACGAGGGACACCTCAGTGTGGTGTCAGGGCCCAGCACCCCCC
34.00797  CCCTGACGACGAAGGACACCTCGATGTGGCAT-AGGGCTTCGTAC-CT--
34.00864  CCTTGACGACGAGGGAAACCTCGGCGCGGTAT--TGCTCCAGAAC-CCGT
34.00880  CCCTGACGACGAGGAAGCGGTGCCTGTGCGCGGAGTTGTGGGCT-TGCGC
34.00896  TCCTGATGAT-AGGAACACCTCAGTGTCATGTCCGGGTCCAGTGCACCGC
34.00910  CCCCGACGAT-AGGCACACCTTAGTGTGGTCTGAGACACGAGTGCACCCT
34.00898  TTCTGACGACGAGGTAAACCTCAGCGTCGTATTGGGGTCCAGTGCATCCC
34.00752  TCTCGACGAC---GGATACCTCAGCGCGGCACCTACGCCCAGGCCTCCCC
34.00751  CATTCACGAC---GGATACCTCAGCGCGGCACCTACGCCCAGGTCCCCCC
34.00753  GTTTCATGACG-GGGAGACCTCAGCGTGGCACCTACGCCCAGGCCTCCCC
34.00754  CTCTCATTAC-AGAGAAACCTCAGCGTGGCACCTACGCCCAGGTCTCCCC
34.00761  -------------------CTCCGTTTAATACCAGGG-CCAAGTC-CCCC
34.00762  CCGTGTCGACGTGG-TGCGCGCAAGGCGTCGTCAGGGC--AG-ACAC---
34.00776  CCTTGATGACG-GG-ACACCTCAGGGTGGTGTCAGGGCCCAGCACATCCC
34.00777  CGGTGATGACG-GG-ACACCTCAGGGTGGTGTCAGGGCCCAGCACATCCC
34.00779  CCTTGATGACG-GG-ACACCTCGGGTGATTGTCAGGGCCCAGCACATCCC
34.00781  CCCTGCTCGGAGCAAACAC---AGAGTAG---CAAA--CCATGAGACCTA
34.00782  GTCTGATGCCGGCATACCTCTCAGGGTGGTGTCAGGGCCCAGCACATCCC
34.00783  CCCTG-TGACGAGGGACCTCTCAGGGTGGTGTCAGGGCCCAGCACATCCC
34.00800  CCCGGATGGCGTGGGACCCCTCAATGTGGCATCAGGGTCCAGTGCTACT-
34.00851  CGTTGAAGGGAAGGGACACCTCGGCGTGGCTTCAGGGTTCAGTCCTCG--
34.00854  CCCTGATGACGAGGGACACCGCAGTCCGGTGTCAGCGTCCCGTGCACCCC
34.00855  CCCCGATGACGAGGCACACCTCGCTGGGCTATCTGGGTCCAGTGCACC--
34.00859  CCTTG-TGACGAGGGAACTCTCAGTGCGGTTTCAATGTGCACTAC-CCA-
34.00860  CTCTGATGCCGAGGGAACCCTCAGTGTGATATCAGGGTCCGGTACACC--
34.00867  CCCTGATCAAGAGGGGCACCTCCGTGTGGTATCAGGGTGCAGTACAGCCC
34.00869  TCTTGATGACGCGG-ACGCCCCTGTGTGGTATCAGGGTGCAGTACAGCCC
34.00873  TCATGATGACGCGG-ACGCCCCTGTGTGGTATCAGGGTGCAGTACAGCCC
34.00876  CCCTGATGACGAAGGACACCACAGGCTGGTGTCAGCGTCCAGTGCACGCC
34.00877  TCCGGATGACGAAGGACACCACAGGCTGGTGTCAGCGTCCAGTGCACGCC
34.00879  TCCGGATGACGAAGGACACCACAGGCTGGTGTCAGCGTCCAGTGCACGCC
34.00893  CCCCAATGATGCGGGACACCTCGGTGTGCGGTCAGGGATCAGTGC-CC--
34.00894  CCCCGATGATGCGGGACACCTCGGTGTGCGGTCAGGGATCAGTGC-CC--
34.00895  CTCCTCTGAC-ACGCCCACCTCACTGTCGTATCAGGGTCCGCTACACCCC
34.00900  CTCTGATGCGGAGGGGCACTTCAGCGTGGTTTCAGAATCCAGCACACACG
34.00904  TCCTCATGGCGGGCGACACTGCCGCGTGGGGTCAGGGTCCAGTGCACCCT
34.00911  CCCTCACGATGAGGGGCACCACAGTGTGGCATCAGCCACCACCA--CCGT
34.00755  CTCTGGTGATGAGA----CCTCAGCGTGGCACCTACGCCCAGGTCTCCC-
34.00770  CCCTGATAACGGGAGACACCTCCGTGTGGTATCAGGGTCCAGTACTCCC-
34.00771  TCCTGATGGCGCGGGCTCAGTGCGTGTGGTGTCAGGGCCCAGCACATCCC
34.00778  CTGCGGTTACGAGAGACACCTCGG-ATGGTATCAGGGTCCCGTGC-CCAC
34.00786  CCGTGGTAACGAGGAACACCTCAGTGTGGTGTCAGGGCCCAGCACTCCC-
34.00795  GCCT-CTTACGTGGGATACGTCAGTGTGGTATCAGGGCTCAGCGGTCCCC
34.00796  CCCTCATGACGGGGGATACGTCAGTGTGGTATCAGGGCTCAGCGGTCCCC
34.00798  CCCTCATGACGGGGGATACGTCAGTGTGGTATCAGGGCTCAGCGGTCCCC
34.00845  CCATGATGTCGAGGGACACCTCAGTGCGGTGTCAGGGTCCCGTGCGCCCC
34.00856  CCTCGATAACGGGGGACTCCTCAGTGCGGTTTCAATGTGCACTAC-CCA-
34.00870  CATCGATGACGGCGGACGCCCCTGTGTGGTATCAGGGTGCAGTACAGCCC
34.00883  CCCTAATGATGTGGAATACCACTGCGTGGTGCCAGGGTCCATTGC-CCCC
34.00886  CCGCGATGACGAGGGATACCTCCGTGCGGCATCGGGGTCCAGTGCACCCC
34.00887  TCCTCATGACGAGGGACACCTCCGTGTGTCATCGGGGTGCAGTGCACCCC
34.00888  CCCTGGTGACGAAGGACACCTCCGTGTGTCATCGGGGTGCAGTGCACCCC
34.00890  CTCCGATAACGAGGGACACCTCCGTGCGGCATCGGGGTCCAGTGCACCCC
34.00891  GTCAGATGACGAGGGACACCTCCGTGCGGCATCGGGGTCCAGTGCACCCC
34.00905  CCCCGATGCCGAGGTACGCCTCTGTGTGCTCTCTCGTTGTTCAGCACTCC
34.00906  ACCTCCTAGAGGGAA-CGCCTCCGTATTGCATCAGGGTCCACGTCTC---
34.00907  ACATCATGTCGATGGACGCCTCCGTATTGCATCAGGGTCCACGTCTC---
34.00912  TCTTCACGACGAGGGGCGCCACAGTGTGGCATCAGCCACCAGCA------
34.00914  CCTTCACGAGGAGGGGCGCCACAGTGTGGCATCAGCCACCACCA------
34.00902  CTGTGATTTAGATA------------------------------------
35.01077  CCCTGATGCCGAGGGACACCTCAGCATAGTATCAGGCTCCAGTGC-CCCC
35.01085  -------------------GCAAGCGTTCTTTACCAGTTCCGCCCACTCA
35.01089  CTCTGATGACGAGGAGCATCCCAGCGTGGCATCAGGGTCGAGCGC-C---
35.01099  CCCTGATGACGAGGGACGCCTCAGCGTGGTACCAGAGTCCAGCA-ACCCC
35.01100  CCCTGATGACGGGGGACGCCTCAGCGTGGTACCAGAGTCCAGCA-ACCCC
35.01098  CCCTGATGACGGGGGACGCCTCAGCGTGGCGCCAGAGTCCAGCA-ACCCC
35.01116  CGCCGATGACGCCGGTGCTAGTGAT-TCTGATCAGGG-GCGCCACATCTC
35.01123  CGCTGACGGCGAGGGACGCCGCCATGTGTCATCAGAGTGCAGTACAT---
35.01130  TTCTATCGATTAGTG----CCCAGC-CCTCATCATCGTCGCACCTGCCCG
35.01132  AGCTCTCGACCATGGATAGCTGAGCGTGGCTTCCGGGTCCAGCGCTCC--
35.01171  CCCTGATGACG-GGGACACCGCAGTGTGGTGTCAGAGCTCGGTGC-CCCA
35.01119  ---------------ACATGCACCGGTGCTTCGACGG---AGCACACCTC
35.01080  CCATGATGACG-GGGACACCTCAC-ATTGCACCAGCGTGCACCAC-CCC-
35.01084  CCATGATAACGGGGGACACCTCGGTGTGGAGTCAAGGGCCAATAC-CCCG
35.01091  GCCTCATGACG-GGGATACTTCATTGTGGCATCAGGCTTCCGCACCCTC-
35.01102  CCTTGATGACGAAGGAAACCTCACCGTTGCACCAGGGTCGAGTACATCG-
35.01103  CCTTGATGACGAAGGAAACCTCACCGTTGTACCAGGGTCCAGTACATCG-
35.01104  CCCTCATGACGAGGGGCACCTCACCGTTGCACCAGGGTCGAGTACATCG-
35.01105  CTTTCATGACGAGGAGCACCTCACCGTTGCACCAGGGTCGAGTACATCG-
35.01107  CCTTCACGACGAGGGGCACCTCACCGTTGCACCAGGGTCGAGTACATCG-
35.01121  TCCTAATGAC-AGGGACAGCGCAGCGTGGCATCAGCGCCCAGTGCACGCC
35.01157  CCCTGCTGACGCGGGACATCTCAGCGCGGTTCCAGGGTTTGGGACCCCAG
35.01160  CCCTGATGGCGGGGGACACTTCAGCGTGGCATCAGGGTCCGGCGC-CCC-
35.01163  CCCT-TTGATGAGGGACACCGCAGTGTGGTGTCAGAGT-CAGTGCCCCA-
35.01180  ACC-GGTGACGAGG-TTGCCTCAGTGTGATATCAGGGTCCACAACACCAC
35.01181  CCCTGATGAC-TGGGGCACCAACGCGTGTCATGAGGGT-CCATA-ACTAT
35.01065  CCCTTATGAC-CGGGACACCCCAGTGTGGTGTTACGGCCCAGTA-ATCC-
35.01066  CCACGACAATGAGGGCCACCTCAGTGTAGTGTTACGGCCCAGTA-ATCC-
35.01067  CCCTGATGACGAGGGACGCCTCAGCGTCGTATCAGGGCCCGGCAC-CC--
35.01086  CCCTGATGACGAGGACTACCCCCGCGTGGCATCAGGGTCCAGCGC-CCTC
35.01088  CGCTCATAACGAGGACTACCCCCGCGTAACATCAGAGTCCAGCGC-CCTC
35.01094  TCCTGATCACGTGG--CACTTCAACGTTGTATCAGGCACCAGCACAACC-
35.01095  TCCTCATGACGGGGGACACCTCAGTATGGCATGAGGGTCCAGCACAACC-
35.01097  ACCTGATGACGGGGGACGCCTCACATGCGTGGCA--TCTCTGCACACCCT
35.01106  CTCAGACGAGGAAGGGCACCTCACCGTTGCACCAGGGTCGAGTACATCG-
35.01111  CCCGGATGACGAGGAACACCTCAGTGTGGTGTCGGGGTCCAGTGC-CCGC
35.01112  CCCTGATGACGAGGAACACCTCAGTGTGGTGTCGGGGTCCAGTGC-CCGC
35.01114  CTCCGATGACGGGAGACACCTCAGCGTAGTATCAGGG-ATAGTTC-CA--
35.01120  CCCTGATGGCGAGG-ACCCCCGTGCGTGGTGCCAGGGCTCAGTGCACCCT
35.01126  TCAAGATGACGTTCTCCGACAAAGGGAGATATCAGGG---CGTGCACTAC
35.01128  CCCTGACAACGGGAGACACCTCAGCGTCGCTC-ACGGCCCAGTGTACCCC
35.01137  CCCTGATAGAGGGGGGCACCTCTGCGTGGCATCAGGGTCCAGTGCACCCT
35.01138  CTCCACTGACAAGGGACACCTCTGCGTGGCATCAGGGTCCAGTGCACCCT
35.01139  CTCCACTGACAAGGGACACCTCTGCGTGGCATCAGGGTCCAGTGCACCCT
35.01140  CCCGAATGACGGTTAACACTTCAATGTGGTGCCAGGGCCCAGTGC-CCA-
35.01141  -------------------CACAATCGTTCATGTCCGT-CAGTGCGC---
35.01143  CCCTAATGCGAGACA---CCTCACTGCGGCAT-ACGCT-ACGTGCAC---
35.01146  CTCTGATGCC-ACGGATACCTTCGTGTGTTATCAGGGCCGAGTCTTCCCC
35.01147  TTGTG-TGAC--GGGATACCTTCGTGTGTTATCAGGGCCGAGTCTTCCCC
35.01150  CCCTGTTGGC--GGGATACCTTCGTGTGTTATCAGGGCCGAGTCTTCCCC
35.01151  TTGTG-TGAC--GGGATACCTTCGTGTGTTATCAGGGCCGAGTCTTCCCC
35.01153  GCAGGATGACGAGGG--ACATATC-GCAGCATCAGGGGGCAGTAC-CC--
35.01154  CCCCGAT-ACGAGGGATGCTTCAGTGTGGTATCAGGGGCCAGCGCCCCCC
35.01158  CCCTGATGGCGGGGGACACTTCAGCGTGGCATCAGGGTCCGGCGC-CCC-
35.01165  CCC-GTTGATGAGGGACACCGCAGTGTGGTGTCAGAGT-CGGTGC-CCCA
35.01168  CCCC-ATGATGAGGGACACCGCAGTGTGGTGTGAGAGT-CGGTGC-CCCA
35.01169  CCCT-TTGATGAGGGACACCGCAGTGTGGTGTCAGAGT-CGGTGC-CCCA
35.01170  ATCACAGCATGCGGGACACCGCAGTGAGATATCCGGATCCAGTGC-CCCA
35.01173  CCGTGAGGACGCGGA--ATATCTCTCTGGTATCAGCGTCCAGTGCACC--
35.01176  CTCTGATGACGCGG-AAACCTCGGTTCGGTATCAGGGCCCTGTACACCTC
35.01177  CTCTGATGACGCGG-AAACCTCGGTTCGGTATCAGGGCCCTGTACACCTC
35.01178  CTCTGATGACGCGG-AAACCTCGGTTCGGTATCAGGGCCCTGTACACCTC
35.01179  GCCTG-TAATGATGTAGACCTCAGTGTGTTATCAGATCCCGTTAC-CT--
35.01070  CCCTGATGACGAG--ACACACGTGCGGCATCTCAGAGTCCAGTGCACCAT
36.01030  CTCTGATGACGAGGGGCGCCGC-GTGTGGCA-CACGACCCAGC-CGCCCC
36.01031  CTCTGATGACGAGGGGCGCCGC-GTGTGGCA-CACGACCCAGC-CGCCCC
36.01035  CTCTGATAGCGAGGGGCGCCGC-GTGTGGTA-CACGACCCAGC-CGCCCC
36.01036  ACATGATTACAAGTGACCCCGC-GTGTGGCA-CACGACCCAGC-CGCCCC
36.01037  ACATGATTACAAGTGACCCCGC-GTGTGGCA-CACGACCCAGC-CGCCCC
36.01050  CCCTGATGACGCGGGGGATACCTCAGTGGTGTCAGGGTCTAGTAC-C---
36.01052  CCTTCACCATGAGGGACACCTCGGCGCGTGGTCAGGATCCAGTGCTTCC-
36.01069  CTCTGACGACGTGGGACACCTCAGCGTGATATCAGGATCCAGTGC-CCTC
36.01094  CCCTTCTGTCGAGGGGGGCATAAGCGTTACAATAAGATC-----CACCCC
36.01103  TCATGAC-ACGTGC-ATACTTCAATGTGTTTTCAG--TCCAGAGCCTCGT
36.01132  CCCTGATGACATGGAGCAACTCAGTGTGGCGTCAGGGCCCTGCACATTCT
36.01152  CCCTGATGACGGGGGACACCTCGGTGCGGCATCAGGGTCCAGTGC-CTCA
36.01153  TCCTAAATATGATGGACACCTCGGTGCGGCATCAGGGACCAGTGC-CTCA
36.01154  CCGTTTTCACGGGGGACACCTCGGTGCGGCATCAGGGACCAGTGC-CTCA
36.01109  CATTGACGACGCGGAGCAACGCAGCGTGGTATGAGGGTCAAGAACACCAT
36.01129  ACCTGA-GAAGAGGGACACCCCAGGAGGGCGTCAGGGCCCTGCACATTCT
36.01005  ACCTGATGACGCGGGATAGCTCAATGTGGTATCAGATCTCAGTGCTT---
36.01006  GCGTGATGACGTCGGCCATGTCAGCGTGACATCAGGATCCAGTACA----
36.01007  CCCTGATGACGTCGGCCATGTCAGCGTGACATCAGGATCCAGTACA----
36.01019  CCCTGATGACGAGGGACACGTCCGTGTGGTATCGGGGTCCAGTGCTTC--
36.01021  CCCTGATGACGAGGGACACGTCCGTGTGGTATCGGGGTCCAGTGCTTC--
36.01028  CCCTGATGACGAGGAACATCTCTGTGTGGCCGCAGGGCCCAGTAC-CCTG
36.01040  CCGTGATGACGAGGAACACCTCAGTGCGGCGTGAGGGACCAGTGCACGC-
36.01042  CCGTGATGACGAGGAACACCTCAGTGTGGCGTGAGGGACCAGTGCACGC-
36.01044  CCCTGATGACGAGGAACACCTCAGTGCGGCGTGAGGGACCAGTGCACGC-
36.01045  ACCTGATGACGAGGAACACCTCAGTGCGGCGTGAGGGACCAGTGCACGC-
36.01046  CCCACATGACGAGGAACACCTCAGTGTGGCATGAGGGACCAGTGCACGC-
36.01048  CCCTGATGACGAGGAACACCTCAGTGCGGCGTGAGGGACCAGTGCACGC-
36.01049  CACTCATAAGGGGGGGCACCTCCGTGTGGTATCAGGATCCAGTGCTTCC-
36.01051  CACCGTTGTACACGGACTCCA-GCGATGGTATCAGAGTTCCGTAC-CCCT
36.01054  CCCTGAAGATGGAGCACGCACCAGCGTGGTATCACAGCTCGGCACACCCC
36.01060  CTCTCATGACAAGGAACACCTCTACATAGTATC-GAGACCAGTGC-CCTC
36.01061  CCCTGCTGACGCGGGACACCTCTGCGTGGTATCAGGGTTCAGTGCTCCCC
36.01064  CCCAG-TGATGAAGGACACCTGACTGCGGCGTCAGGATCCAGTGC-CCTC
36.01066  CCGTTATGACGAGGAACACCTGACTGCGGCGTCAGGATCCAGTGC-CCTC
36.01073  TGCTGCAGACGGGGGATACCTCAGCGGGGTATCAGGGTTCAGCGCACCAC
36.01075  TCCTGATGACGGGGGACACCTCAGCGTGGTGACCGGGTCACGTGC-GTAC
36.01077  CCTTGAGGTCGTG---------CGTGTCTTATCAGGTTC-ATT-C-----
36.01088  CCGTGATGACG-GGGACACATCAGTGTGGTATCAGGGTGCAAGACCCCCC
36.01095  CCCTGACGAGG-GGGACACCTCAGCGTCGTATCAGGGTTTAGTAC-CCCC
36.01098  CCCTGATGACGAGGGACACCTCAGCGTAGTAGCATAGTCCAGCACCCCCC
36.01111  TTTTGATGAGGAAAGGCACGTCAGTGTGGTATAAGGGTAGAGAA-ACCT-
36.01113  CCC-GATGACGGGGGGCACTTCCGCGCTGTATCAGTGTCCAGAAC-CC--
36.01114  CCCTGATGACG-GGGAGAGCTCACTGCAACATCAATGTCCAGTACCCCCC
36.01134  CTCTGCGG-C-AGGGACACCGCGCTGGTGTCTTGGCGTTCACCACAACTC
36.01145  CCCTGATGACGGGGGACACCTCGGTGCGGCATCAGGGTCCAGTGCATCT-
36.01149  CCCTGATGACGGGGGACACCTCGGTGCGGCATCAGGGACCAGTGCATCT-
36.01009  CGCTG-TGA-GAGGGACACATCAGCGTGAAACCGGTGTCCGGTGCACCCC
36.01013  TCATGATGACGTGG-ACAGCTGACTGTCGTATGAAGACCCAGCGCACCCC
36.01070  CCCTGATGACGAGG-ACACCTCAGCGTGATATCAGGATCCAGTGC-CCTC
36.01072  CTCTGATGACGAGG-ACACCTCAGCGTGATATCAGGATCCAGTGC-CCTC
36.01080  CCCTG-TGACTATGAACACCTGACTGTGTTATCAGGGTTCCGTGC-----
36.01083  CCCTGATGGTGGGGGGCACGCCAGCACGGTATCAGGGTCCAGCGC-CCCC
36.01084  CCCTGATGGTGGGGGGCACGCCAGCACGGTATCAGGGTCCAGCGC-CCCC
36.01085  CTCCTTTG-CGACA-TCCCCTCCGTGTGGTATCAGGGTCCAGCGC-CCCC
36.01100  CCCTTACAGCGAGA-ACACCTCAGTGTGGTAGCAGCCCTGAGTCCAG---
36.01102  TTCTCACGGCGCGG-ACACTTCAGTGTGGTAGCAGCCCCGAGTCCAG---
36.01116  CACCGATGACGAGGAGCACCCCAACGGGGTGTCAGGGTCTAGTACGCCCC
36.01119  CGCTAACGACGAGGGACACCTCAGTGTGACATCACCGTCCATACCTCCC-
36.01122  CCCTAATGAAGAGGGATACATCAGTGTGG-CTCACGTTCCATACCATCCC
36.01137  GCATGATGAGGAGCGAAATGTCAGTGTGGTGTCAGTGTCCAATGCAG---
36.01138  CCCTGATGAC-AGGGACACGTCAGTGTGGTGTCAGTGTCCAATGCAG---
28.00595  TCTTGATGACGACGTGCACCTCATGGTGGTTTCAGGCAGCCGGGCCCCCT
21.00364  CCCTCTGGAT-----TCGC-------------------------CCCCCC

ACA-----------------------------------------------
AC---GCG-GGAGTCCGAGCA-----------------------------
ACTTGGTGAGAAAGCCAAGCAG--CCC-CGATCCTTGCCAATGCCGGACC
ACTCTGTGGGGACGGCAAGCGGC-CCCTCTATCCCTGCCAATGCCGAAGC
AT---GCGA--AAGTCGAGC-G----------------------------
TGTGTGTGAG-AAGCCAAGCAGCCCCCTCTATCCCTGCCAATGCCGCACC
TCTCTGTGAGGGAGCCACGCAGCTCCCTCTATCTCTGCCAATGCCGAGCC
ACACAGTGAGGAAGCCAAGCAGCTACCTGTATCCCTGCCAATGCCAAACC
ACACAGTGGGGAAGCCAGACATCTGCCTCTATCCTTGTCAATGCCGAGCC
ACTCTGTGAGGGAGCCGATCAGCTCCCTCTATCGCTGCCAATGCCGAGCC
ACTCTGTGAGGGAGCCGAGCTGC-CCCTCTATCCCTGCCGATGCTGCACC
ACTCGGTGGCGAAGCCGGGCAGCTCCCTCTATTCCGGCCAATGCACAGCC
ACTCCGTGTGTAGTCCAAGCAGCTCCTTCTATCCACGCCCATGCCGAACC
GCGCGGTGGGCAAGCCAAGCAGCTCCTTCTATCCCTGGCAATGCCCAACC
ACGCTGTGAGCAGGGCGAGGCG----------------------------
ACTCGGTGAGGAAGCCGAGCAG---CCTCT-TCCCTGCCAGCACCGCACC
TCTCGGTACGGTAGCGAAGCAGCACCCTCTATCTCTGCCAATGCGAAGCC
GCTCTGTGCGGAAACCCGGCAGCTCCCTCTATCCCTGCCAACGCCAAACC
GCTCTGTGCGGAAGCCCGGCAGCTCCCTCTATCCCTGCCAACGCCGAACC
GCTCTGTGCGGAAGCCCGGCAGCTCCCTCTATCCCTGCCAACGCCGAACC
GCTCTGTGCGGAAGCCCGGCAGCTCCCTCTATCCCTGCCAACGCCGAACC
ACCCC-----------------CTCCCTCCGTCCCGGCCCATGCCGAACC
ACCCC-----------------CTCCCTCCGTCCCGGCCCATGCCGAACC
ACCCC-----------------CTCCCTCCGTCCCGGCCCATGCCGAACC
ACCCC-----------------CTCCCTCCGTCCCGGCCCATGCCGAACC
ACTCCGTGTG-AGTCCAAGCAGCTTCCTCTATCCACGCCCATGCCGAACC
ACTCTGAGAGGAGGCCAATCAAATCCCTCTATCCCTTCCAACGCCG-GCC
------TGCGGAAGCGAAGCGGATCCCTCTATCCCTTCCAACGCCG-GCC
TCTCT---------------------------CCCTGCCAATGCCGAACC
TCTCT---------------------------CCCTGCCAATGCCGAACC
ACACTGTGAGGGAGG-GAGCAGCTCCCTCTATCCTTGCCAACGCAGAAGC
TCAGTGTGTGGGGGGCAGGCAGCACCACCTATCCTTGCCAATGCCGAACC
ACTCTGTGAGGAGGCCAGGCAGCGCCCTCTATCCTTGCCAATGCCGAACC
GTTCTTTGGGGAAGTAAAGAAG--CCC---ATGCCTACAAATGCCGATCC
GCTCTGCGAGGAAACCAAGAAGCCCCCTCGACCTCTGCTGGTGCCGAGCC
GCTCTGCGAGGAAACCAAGAAGCCCCCTCGACCTCTGCTGGTGCCGAGCC
ACTCTGTGAAGAAGCCAAGCAGCCCCCTCCATCCCTGCCAACGCCGCACC
ACTCTGGGTGGAAGCCGAGCAGCTCCCTCTATCCTTGCCGGTGCCGGGCC
ACTCTGGGTGGAAGCCGAGCAGCTCCCTCTATCCTTGCCGGTGCCGGGCC
ACTCTGGGTGGAAGCCGAGCAGCTCCCTCTATCCTTGCCGGTGCCGGGCC
ACTCTGGGTGGAAGCCGAGCAGCTCCCTCTATCTTTGCCGGTGCCGGGCC
------------------------CCC-CTACCCCTGCCGATACCCACCC
ACTCTGCGGGCAAGTCAAGCAG--CCCCCTAGCCCTTCCAATACACAACC
ACTCTGCGGGCAAGTCAAGCAG--CCCCCTAGCCCTTCCAATACACAACC
ACGT-GCG-GGAGGTCCAGC-G----------------------------
ACTCTGCGAA-AAGCCG-GCAGCTCCTACTCTCCCTGCCACTGCCGAGCC
ACTCTGCGAA-AAGCCG-GCAGCTCCTACTCTCCCTGCCACTGCCGAGCC
-----GCG-GGAGCCCGGGCAGCTCTTA-TATCCCTGCCACTGCCGAGCC
-----GTGGGGGGTCAGGACGG----------------------------
-----GTGGGGGGTCAGGACGG----------------------------
TCTCTGTGTGGAAGCCCAGCAG--CCC-CTATACCTGCCCGCGCCGAGCC
TCTCTGTGTGGAAGCCCAGCAG--CCC-CTATACCTGCCCGCGCCGAGCC
TCTCTGTGTGGAAGCCCAGCAG--CCC-CTATACCTGCCCGCGCCGAGCC
ACTCTGCGAA-AAGCCGGGCAG--CCCTCTATCCCTGCCACTGCCGAGCC
----------------------CCCCCTCTATTCATGCCAATCCCGAGCC
A-TCTGCGAAAAAGCCAGGCAGCCCCCCC---ACATGCCAATGCGAAACC
ACTCTGCGAA-AAGCCG-GCAGCTCC-TACATCCCTGCCACTGCCGAGCC
GCTCTGTGAG-AAGCCAAGCAGCTCCCTCTATCCCTGCCAGTGCCGAGCT
GCTCTGTGAG-AAGCCAAGCAGCTCCCTCTATCCCTGCCAGTGCCGAGCT
ACTCTGCGAG-AAGCCGAGCAGCTCCCTCTATGCCTGCCAATGCCGAGCT
ACACA-----------------TTCACCCTATCTCTACCAACGCACAGCC
ACGATGTGAGGGCGTAGGGCAG----------------------------
ACATCGT-------------------------------------------
ACGATGTGAGGGCGTAGGGCAG----------------------------
----------------------CCCCCTCTATCCCTGCCAACGCCGAGCC
----------------------CCCCCTCTATCCCTGCCAACGCCGAGCC
ACTCTGCGAG-AAGCCGAACAGCTCCCTCTATGCCTGCCAATGCCGAGCT
ACTCTGCGAG-AAGCCGAACAGCTCCCTCTATGCCTGCCAATGCCGAGCT
ACTCTGCGAG-AAGCCGAGCAGCTCCCTCTATGCCTGCCAATGCCGAGCT
ACGATGTGAGGAGGGCGAGCGG----------------------------
ATTCTGTGTGAAAGGCATGCAGGTT--TCTATCCCTGCGAATGC-GAAAC
ACGGT---------------------------------------------
AGTCT-TGTAGAAGCCAGGCAGTTT--TCTATCCCAGCCAGTGCACAGCC
ACTCGGTGTGGACGCTGAGCACCTCCCTCCGTTCCGGCCAATGCGGAGCC
-----GT-TGGGGGCCAGGAAGCTCACTCTATCCCTGCTAATGTCAAGGC
ACTCTGTGAGGAAACCGAGTAGCTACCTCTATCCCTGGAAATGCCAAACC
ACTCCGTGAGGAAGCCGAGCAG--CCC-CCATCTCTGCCCATGCCGAGCC
ACTCCGTGAGGAAGCCGAGCAG--CCC-CCATCTCTGCCCATGCCGAGCC
ACCGTGTGAGGAGGCCGAGC-G----------------------------
ACTCCGTGAGGAAGCCGAGCAG--CCC-CCATCTCTGCCCATGCCGAGCC
ACCGTGTGAGGAGGCCGA-C-G----------------------------
ACTCCGTGAGGAAGCCGAGCAG--CCC-CCATCTCTGCCCATGCCGAGCC
-------------------------CC-CTATTCCAGCCAATGCGGAACC
ACTCGGTGTGGACGCTGAGCAGCTCCCTCTATGCCTGCCAATGCCGAACC
ACTCGGTGTGGACGCTGAGCAGCTCCCTCCGTTCCGGCCAATGCGGAGCC
ACTCGGTGTGGACGCCGAGCAGCTCCCTCCGTTCCGGCCAATGCGGAGCC
ACTCGGTGTGGACGCCGAGCACCTCCCTCTATGCCTGCCAATGCCGAACC
ACTCGGTGTGGACGCCGAGCACCTCCCGCCATCCCGACCAATGCGGAGCC
ACTCGGTGTGGACGCCGAGCACCTCCCGCCGTTCCGGCCAATGCGGAGCC
ACTGTGTGAGGAAGTCAGGCAGCTCCCTCTATCGCTGCCAATGCCGAACC
ACTCGGTGTGGACGCCGAGCAGCTCCCGCCAT-CCCGACAATGCGGAGCC
ATTCGGTGACCATGCCAAGCAGCACACCCT--CTCTGCCAATGGCGCGCC
ATTCGGTGACCATGCCAAGCAGCACACCCT--CTCTGCCAATGGCGCGCC
ACTGTGGGAGAGAGCC-AGCTGCCCCCCCCATCCCTGCCAATGCCG-GCC
GCTCTGTGAG-CCGCCAGGCAGC-CCC-CCATCCCTGCCCATGCCGAACC
GCTCTGTGAG-CCGCCAGGCAGC-CCC-CCATCCCTGCCCATGCCGAACC
TCTCTGTGAG-CCGCCAGGCAGC-CCC-CCATCCCTGCCCATGCCGAACC
ACCCCGTGAG-CCGCCAGGCAGC-CCC-CCATCCCTGCCAATGCCGAACT
ACTCCCTGAG-GAGTCAAGCAGCTCCC-CTATCCCTGCGAGTGCCGACCC
ACTCCCTGAG-GAGTCAAGCAGCTCCC-CTATCCCTGCGAGTGCCGACCC
ACTCCCTGAG-GAGTCAAGCAGCTCCC-CTATCCCTGCGAGTGCCGACCC
ACTCCCTGAG-GAGTCAAGCAGGTCCC-CTATCCCTGCGAGTGCCGACCC
ACGCTGTGAG-CCGCCAGGCAGC-CCC-CCATCCCTGCCAATGCCGAACC
ACGCTGTGAG-CCGCCAGGCAGC-CCC-CCATCCCTGCCAATGCCGAACC
ACGTTGTGTG-GAGTCGAGCAGCTCCCACTCTTCGTGCCAATGGCGAGCC
ACCC-------------------TT--TCTATCCCTGCTCATGCTCAGTC
ACCC-------------------TT--TCTATCCCTGCTCATGCTCAGTC
ACCCTGTGAGGAGGAGGAGGAGCACCCACTATCCCTGCCAGTGCCGAGCC
TCTCTGTGAGGAGGCCAGACAC-CCACACTATCCCTGCCAGTGCCGAGCC
TGTGCGCGGGGAAGGGGGGAAGCACACTCTATCCCTGCTAGTGCTGTGGC
TTACAGTGAGGAAGTTAAGCGG-CCCCCCTACCCCTATCAATGCCGAATC
AATCTGTTAGGAAGCCAAGCAGCCTCTTCTATCCGTGCCAATGCAGAACC
AATCTGTTAGGAAGCCAAGCAGCCTCTTCTATCCGTGCCAATGCAGAACC
AATCTGTTAGGAAGCCAAGCAGCCTCTTCTATCCGTGCCAATGCAGAACC
AATCTGTTAGGAAGCCAAGCAGCCTCTTCTATCCGTGCCAATGCAGAACC
ACTCGGTGGGGAGGCCAAGCAGCCCCCTTTATCCCTGCCAGTGCAGAGCC
ACTCGGTGGGGAGGCCAAGCAGCCCCCTTTATCCCTGCCAGTGCAGAGCC
ACTCGGTGGGGAGGCCAAGCAGCCCCCTTTATCCCTGCCAGTGCAGAGCC
------------------------CCCTTTATCCCTGCCGATGCCGAGCC
ACACCGTGCGGACGCCAAGCGAATCCCACTATTCCTGCCAACGCCGAACC
TCTCTGTGAGGAGGCCAGACACCACACCCTATCCCTGCCAGTGCCGAGCC
AGTCTGTGGGGAAGCCAAGCAG--CCCCTTAACCCTGCCAATACCGAACC
TCTCTGCGGGAAAGCCACGCAGCTCCCTGTATCCCTGCCAATGCCGAGCC
ACTCTGTGCGGGGGCCGTGTAG---CC-----------------------
ACTCTGTGCGGGGGCCGTGTAG---CC-----------------------
ACTCTGTGTGGACGCCAAGCAGCTCCTTCCATCCCTGCCAATGCCGAACC
ACTCTGTGTGGACGCCAAGCAGCTCCTTCCATCCCTGCCAATGCCGAACC
CCTCAGTGTGAAAGCCAAGCAGCCCCCTCCATCCCTGCCAATGCCGAGCC
ACTCTGTCAGGAGGCCGAGCG-----------------------------
ACTCTGTGTGGACGCCAAGCAGCTCCTTCCATCCCTGCCAATGCCGAACC
ACTCTGTGTGGACGCCAAGCAGCTCCTTCCATCCCTGCCAATGCCGAACC
ACTCTGTGTGGACGCCAAGCAGCTCCTTCCATCCCTGCCAATGCCGAACC
ATTCGGTGGGGGAGCCAAGCAGCCCCCT-TATCCCTGCCAATGCTTAACC
ACTCTGAGGGGAAGCCTGGC-GCGTC-T-TAACCCTGTCGATGCCAAGCC
TCTCTGTGGGAAAGCCACGCAGCTCCCTGTATCCCTGCCAATGCCGAGCC
ACTCTGCGGGGAAGCCTGGC-G-TCG-TCTAACCCTGTCGATGCCAAGCC
ACTCTGTGGCGAAGCCAAGCGG---GCACTGACCTTACCAACGCCGGGCC
ACTTTGAGGGGAAGCCTGGC-G-TCG-TCTAACCCTGTCGATGCCAAGCC
ACTCTGCGGGGAAGCCTGGC-G-TCG-TCTAACCCTGTCGATGCCAAGCC
ACTCTGCGGGGAAGCCTGGC-G-TCG-TCTAACCCTGTCGATGCCAAGCC
ACTCTGCGGGGAAGCCTGGC-G-TCG-TCTAACCCTGTCGATGCCAAGCC
ACTCTGAGGGGAAGCCTGGC-G-TCG-TCTAACCCTGTCGATGCCAAGCC
ACTCTGTGAAGGGGACAAGCAGTTCCCCCAATACCTGCCCATGCCGGTCC
ACTCTGTGAAGGGGACAAGCAGTTCCCCCAATACCTGCCCATGCCGGTCC
ACTCTGTGAAGGGGACAAGCAGTTCCCCCAATACCTGCCCATGCCGGTCC
ACTCTGTGAAGGGGACAAGCAGTTCCCCCAATACCTGCCCATGCCGGTCC
-----------------------------TATCCCTGCCAATGCGAAACC
GCTCTGTGAGGAGGCCAAGCAG-CCCCACTATCCCTGCCGATGCCAAACC
GCTCTGTGAGGAGGCCAAGCAG-CCCCACTATCCCTGCCGATGCCAAACC
ACTCTGTGAGGAGGCCAGGAAG-CCCCCCTATCCCTGCCAATGGCGAACC
TCTCTCTG-GGAGGCCGAGCAGCTCTCTCTCTCCCTGCCAGTGGTGAACA
TCTCTCTG-GGAGGCCGAGCAGCTCTCTCTCTCCCTGCCAGTGGTGAACA
TCTCTCTG-GGAGGCCGAGCAGCTCTCTCTCTCCCTGCCAGTGGTGAACA
TCTCTCTG-GGAGGCCGAGCAGCTCTCTCTCTCCCTGCCAGTGGTGAACA
TCTCTCTG-GGAGGCCGAGCAGCTCTCTCTCTCCCTGCCAGTGGTGAACA
TCT--CTGAGCGAGCACAACCGCTCCCTCCACCCGTGCCAATACCCACCT
TCT--CTGAGCGAGCACAACCGCTCCCTCCACCCGTGCCAATACCCACCT
----------------------CACC---TAT------------------
----------------------CACC---TAT------------------
----------------------CACC---TAT------------------
----------------------CACC---TAT------------------
----------------------CACC---TAT------------------
TCTCTGTGGGGAGGCGGAGCGGCTCCCTCCATCCCTGCGCATACGGGACC
GCTTTCTGCGAAAGCCGAGGAGC-CCC--TATCCCTGCTAATGCGGAACT
ACTGCGTGGGAAAGCCAAGCGGCTCCCTCAATCCCTGCCAATGCAGAGCC
ACTGCGTGGGAAAGCCAAGCGGCTCCCTCAATCCCTGCCAATGCAGAGCC
ACTCGGTGTGAGAGACAGGCCGCTCCC-CTATCCCTGCCAATGCCAAAAC
ACTCGGTGTGAGAGACAGGCCGCTCCC-CTATCCCTGCCAATGCCAAAAC
ACTCTGTGGGAAAACCAAGCGGCTCCCTCCACCCCTGCCAAAGCAGAACC
ACTCTGTGGGAAAACCAAGCGGCTCCCTCTCTCCCTGCCAAAGCAGAACC
ACTCTAT-TGGAATCCAAAGAG--CCC-CTATACCTTCCAATGCCAAGCC
ACTCTGGGGGGAAGCCGAGCAGCCCCCTCTGTCCTTGCCAGTGCCGAGCC
ACTCGGCGAGGAGTGTAAGAAG-TCCACCTATCCCTGCGAGTTCAGAGCC
TCTGTGTGGGGAGGCGGAGCGGCTCCCTCCATCCCTGCGCATACGGGACC
TCTGTGTGGGGAGGCGGAGCGGCTCCCTCCATCCCTGCGCATACGGGACC
TCTGTGTGGGGAGGCGGAGCGGCTCCCTCCATCCCTGCGCATACGGGACC
TCTGTGTGGGGAGGCGGAGCGGCTCCCTCCATCCCTGCGCATACGGGACC
TCTGTGTG-GGAGGCGGAGCGGCTCCCTCCATCCCTGCGCATACGGGACC
TCTGTGTGGGGAGGCGGAGCGGCTCCCTCCATCCCTGCGCATACGGGACC
TCTGTGTGGGGAGGCGGAGCGGCTCCCTCCATCCCTGCGCATACGGGACC
ACTCCATG-GGAAGCCGAAAGGCTCCCTCTATCTCTTCGAATGCTGACCC
--------------------------------CCCTGCCAATGCCGAGCC
ACTCTATGAGGAAGCCACGCAG----CT-GATCCTTGCCAATGCCAAAGG
ACTCTATGAGGAAGCCACGCAG----CT-GATCCTTGCCAATGCCAAAGG
ACTCTATGAGGAAGCCACGCAG----CT-GATCCTTGCCAATGCCAAAGG
ACTATGTGGGGAAGCCAGTCAG---CCT-TGTCGCTGCCCATGCCGATCC
ACTCTGTGTGGAAGCCAAGCTG---CCGGTATACCTGCCCATGCCGAACC
ACTCTGTGTGGAAGCCAAGCAGCCCCCTCCATCCTTGCCCCTGCCGAACC
ACTC--TGTG-AAGCCAGGCAGCTTCC-CTATCTCTGTCAATGCACAGCC
--------------------------------CCCTGCCAATGCCGAGCC
ACTCTTTGGGGAGCCAAAGCTG---CC--TATACCTGCCCATGCCGAACC
ACTCTGTGGGGAACCAAGGCTG---CC--TATACCTGCCCATGCCGAACC
ACTCTTTGGGGAGCCAAAGCTG---CC--TATACCTGCCCATGCCGAACC
ACTCTGTGGGGAACCAAGGCTG---CC--TATACCTGCCCATGCCGAACC
ACTCTGTGGGGAACCAAGGCAG---CC--TATACCTGCCCATGCCGAACC
AG--------------------CTTCATCGCTCCCTGATTATACCGA-CC
ACGCTGTGAGCAGGGCGAGC-G---CC--TAC------------------
ACTCGGTGAGGAAGCCGCGCAG---CC--TCTCCCTGCCAGCACCGCACC
ACTCGGTGAGGAAGCCGCGCAG---CC--TCTCCCTGCCAGCACCGCACC
ACTCGGTGAGGAAGCCGCGCAG---CC--TCTCCCTGCCAGCACCGCACC
ACTCGGTGAGGAAGCCGCGCAG---CC--TCTCCCTGCCAGCACCGCACC
ACGCTGTGAGCAGGGCGAG-------------------------------
ACTCTGTGACGAGGCCAAGCAGCTCCCACTTTTCCTACCAATGCCGAGGC
ACTCTGTGCGGGGGTCGGGGAGCACACTTTATCTCTGCAAACGCCGAACC
----------------------CACCCTCTAGCCCTGCCAATGCCGAGCC
----------------------CACCCTCTAGCCCTGCCAATGCCGAGCC
ACTCTGTG-GGAAGGCGAGCCG----------------------------
ACTCTGCG-GGAAGGCGAGCGGCACCCTCTAGCCCTGCCAATGCGGGGCC
ACTCTGTG-GGAAGGCGAGCCG----------------------------
ACTCTGCGAGGAGGCGGAGCGGCACCCTCTAGCCCTGCCAATGCGGGGCC
ACTCTGCGAGGAGGCGGAGCGGCACCCTCTAGCCCTGCCAATGCGGGGCC
ACTCTGCGAGGAGGCGGAGCGGCACCCTCTAGCCCTGCCAATGCGGGGCC
ACTCTGCGAGGAGGCGGGGCCG----------------------------
TCTCGGTGGGGAAGCCAAGCAGCACCCTCTAGCCCTGCCAATGCGGGGCC
ACGCTGTGAGCAGGGCGAGC-G--CC---TAC------------------
ACGCTGTGAGCAGGGCGAGC-G--CC---TAC------------------
ACTCTGTGAG-AAGTCACTCGG-TCCC--TAGCCCTGCCAGTGCCGAACC
ACTCTGTGAG-AAGTCACTCGG-TCCC--TAGCCCTGCCAGTGCCGAACC
--------------------------------CCCTGCCAATGCCGAACC
--------------------------------CCCTGCCAATGCCGAACC
--------------------------------CCCTGCCAATGCCGAACC
--------------------------------CCCTGCCAATGCCGAACC
--------------------------------CCCTGCCAATGCCGAACC
ACTCTGTCTGGGAAGCAGGCAGCACCATCCATCCCTGCCAACGCCAAGCC
ACTCTGTGAAGCAGGCAGGCCGCACCATCCATCCCTGCCAACGCCAAGCC
CCTCTGT-------GCTGACAGC-CCCACCATCCCTGCCAACGCCGAGGA
ACTCTGTCTGGGAAGCAGGCAGCACCATCCATCCCTGCCAACGCCAAGCC
ACTCTGTGAGGAAGCTCAGCGGCTCCCTCTATCCCTGCCAGTGCGGAACC
ACTCTGTGAGGAAGCTCAGCGGCTCCCTCTATCCCTGCCAGTGCGGAACC
AATCTGTGAG-AAGTCGAGCAGCTCCCTCTATTCCTGCCAGTGTCGAGCC
AATCTGTGAG-AAGTCGAGCAGCTCCCTCTATCCCTGCCAGTGTCGAGCC
GCTCTGTGAG-AAGTCGAGCAGCTCCCTCTATCCCTGCCAGTGTCGAGCC
ACACA-----------------CACCATCTATTCCCGGGAACGCCGCACC
--------------------------CCCTATCCCTGCCAGTGTCGAGCC
-----GTGGGGAGGGCCAGCAGATCCCACCATCCCTGCCAACGCCGAACC
GCTCCGTCAAGACGC-CAGGAG-ATCTTCCATCCCTGCCAACGCCGAACC
GCTCCGTCAAGACGC-CAGGAG-ATCTTCCATCCCTGCCAACGCCGAACC
ACTCTGTGAGGAGGCCTAGCAGCCCCCACCATCCCTGCCAACGCCGAACC
ACTCTGTGAGGAGGCCCAGCAGCCCCCACCATCCCTGCCAACGCCGAACC
ACTCTCTGAG-AAGCCGTGCACCCGGCACCATCCCTGCGAATGCCGAGCC
-----GTGTGGAAGCCCGGCAA------CCATCCCTGCGAATGCCGAGCC
-----GTGTGGAAGCCCGGCAA------CCATCCCTGCGAATGCCGAGCC
GCTCTGTGAG-AAGTCGAGCAGCTCCCTCTATCCCTGCCAGTGTCGAGCC
-----GGGAG-AAGCCGAGCAGCCCCCTCTATCCCTGCCAATACAGCACC
ACTCTGTGAGAAAACCAGGCGGCGCCCTGTATCCCAGCCAACGCCGAGCC
ACTCTGTGAGAAAACCAGGCGGCGCCCTGTATCCCAGCCAACGCCGAGCC
ACTCTGTGAGAAAACCAGGCGGCGCCCTGTATCCCAGCCAACGCCGAGCC
ACTCTGTGAGAAAACCAGGCGGCGCCCTGTATCCCAGCCAACGCCGAGCC
TCTCTGTGAGAAAACCAGGCGGCGCCCTGTATCCCAGCCAACGCCGAGCC
-----GTGACGCGGCCGAGCAGCTCCCTCTATGCCTGCCAATGCCGAACC
-----GTGACGCGGCCGAGCAGCTCCCTCTATGCCTGCCAATGCCGAACC
-----GTGACGCGGCCGAGCAGCTCCCTCTATGCCTGCCAATGCCGAACC
-----GTGACGCGGCCGAGCAGCTCCCTCTATGCCTGCCAATGCCGAACC
-----GTGACGCGGCCGAGCAGCTCCCTCTATGCCTGCCAATGCCGAACC
GCGCTGTGAGGAGGCCAGGCAG-TCCCTCTATCCCTGCGAACGCCGAGCC
ACTCAGTGAGAAAACCAGGCGGCGCCCTGTATCCCAGCCAACGCCGAGCC
ACTG-GTGAGGAGGCCAGGCAG-TCCCTCTATCCCTGCGAATGCCGAGCC
ACTG-GTGAGGAGGCCAGGCAG-TCCCTCTATCCCTGCGGATGCCGAGCC
ACTGTGTGAGGAGGCCAGGCAG-TCCCTCTATCCCTGCGGATGCCGAGCC
ACTGTGTGAGGAGGCCAGGCAG-TCCCTCTATCCCTGCGAATGCCGAGCC
ACTGTGTGAGGAGGCCAGGCAG-TCCCTCTATCCCTGCGGATGCCGAGCC
ACTGTGTGAGGAGGCCAGGCAG-TCCCTCTATCCCTGCGGATGCCGAGCC
ACTGTGTGAGGAGGTCAGGCAG-TCCCTCTATCCCTGCGGATGCCGAGCC
ACTGTGTGAGGAGGCCAGGCAG-TCCCTCTATCCCTGCGAATGCCGAGCC
ACTGTGTGAGGAGGCCAGGCAG-TCCCTCTATCCCTGCGAATGCCGAGCC
GCTCTGTGAG-GAGACAGGCAG-TCCCTTTATCCTTGCCAATGCGGAGCC
ACTCAGTGAGAAAACCAGGCGGGCCCCTGTATCCCAGCCAACGCCGAGCC
GCCATGTGAGGAACCCAAGCAGCACACTCTATCTCTGCCAATGCCGACCC
ACCATGTGAGGAAGCCAAGCAGAGCCCTCTACCCCTGCCGGTGCCGAACC
ACCATGTGAGGAAGCCAAGCAGAGCCCTCTACCCCTGCCGGTGCCGAACC
CCTCTGTGTGGACGCCCAGCAG--CCCTCTATCCCTGCCAATGCCGAGCC
ACTTTGTGTGGAATCCAATGCCCCCCCTCGATCCCTACCAATGCCGAGAC
CCCCTGTGAGGACGCCCAGCAG--CCCTCTATCCCTGCCAATGCCGAGCC
ACCCTGTGAGGACGCCCA-CAG--CCCTCTATCCCTGCCAATGCCGAGCC
ACCCTGTGAGGACGCCCA-CAG--CCCTCTATCCCTGCCAATGCCGAGCC
ACCCTGTGAGGACGCCCA-CAG--CCCTCTATCCCTGCCAATGCCGAGCC
ACCCTGTGAGGACGCCCA-CAG--CCCTCTATCCCTGCCAATGCCGAGCC
ACCCTGTGAGGACGCCCA-CAG--CCCTCTATCCCTGCCAATGCCGAGCC
ACTCCGTGGGGTAGCCAAGCAG-------CACCCCTGCCGATGCCGAACC
TCTGC--GTG-AAGTTCAGCAGCGCCCTCTATCCCTGCCGATGGCGAACC
TCTGTGTCACGCAGCCAACCAGCTCCCCCTATCCCTGCCAATGCCGAACC
TCTGTGTCACGCAGCCAACCAGCTCCCCCTATCCCTGCCAATGCCGAACC
AGAGTGTGGGGAGGCCCAGCAGAGCCC--TATCCCTGCCAACGTCGAGGC
AGAGTGTGGGGAGGTCCAGCAGAGCCC--TATCCCTGCCAACGTCGAGGC
AGAGTGTGGGGAGGCCCAGCAGAGCCC--TATCCCTGCCAACGTCGAGGC
ACCCTGTGAGGACGCCCAGCAGCTCC-TATATCCCTGCCAATGCCGAGCC
ACTCTGCGAGGAAGCCAGGCTG--CCATCTCTCCTTGCTAGCGCCGAACC
ACTCTGCGAGGAAGCCAGGCTG--CCATCTCTCCTTGCTAGCGCCGAACC
ACTGTGCGCA-AGGCCGAGAAGCCCCCTCTATCCCTGCCAGCGCCGAGCC
ACCGTGTGGGGAAGCCAGACAGCCCCCTCTATCCCTGCCAGCGCCGAGCC
ACTGTGCGCA-AGGCCGAGAAGCTCCCTCTATCCCTGCCAGCGCCGAGCC
ACCGTGTGGGGAAGCCAGACAGCCCCCTCTATCCCTGCCAGCGCCGAGCC
ACTCTGTCAGGAAGCCAAGCAGCACCCTCCATCCCTGCCAATGCCGAGCC
ACTCTGTCAGGGAGCCAAGCAGCACCCTCCATCCCTGCCAATGTCGAGCC
ACTCTGTCAGGAAGCCAAGCAGCACCCTCCATCCCTGCCAATGCCGAGCC
ACTCTGTCAGGAAGCCAAGCAGCACCCTCCATCCCTGCCAATGCCGAGCC
ATCTTGCGAAAAAGCCAGGCAG-CCCCCCCCCACATGCCAATGCGAAACC
ACTCTGTGCGGAAGCCAAGCAGCTCTCTCTATCCCTGCCAGGGCAGAGCC
CCTCCGCGGGGAAGCAAAGCAGCTCTCTCTATCCCTGCCAGGGCAGAGCC
ACTCTGTG-GGAGGCCGAGCAGCCCCCTCTGTCCGTGCCAATGCCGAAGC
ACTCTGTG-GGAGGCCGAGCAGCCCCCTCTGTCCGTGCCAATGCCGAAGC
ACTCTGTG-GGAGGCCGAGCAGCCCCCTCTGTCCGTGCCAATGCCGAAGC
ACTCTGTG-GGAGGCCGAGCAGCCCCCTCTGTCCGTGCCAATGCCGAAGC
GCTCTGTGGGGCAGCTGAGTAGCCCCCCCTGTCCCCGCCAGTGCCGAAGC
GCTCTGTGGGGCAGCTGAGTAGCCCCCCCTGTCCCCGCCAGTGCCGAAGC
ACTCA-----------------CTTCCTCCATCCCTGCCGATGCCGAGGC
ACTCA-----------------CTTCCTCCATCCCTGCCGATGCCGAGGC
ACTCA-----------------CTTCCTCCATCCCTGCCGATGCCGAGGC
ACTCA-----------------CTTCCTCCATCCCTGCCGATGCCGAGGC
ACTAA-----------------CTTCCTCCATCCCTGCCGATGCCGAGGC
ACTATACGGGGGAGCAGAGAAGCCCCCCCTATCCCTGCCAGTGCAGGGCC
ACTATACGGGGGAGCAGAGAAGCCCCCCCTATCCCTGCCAGTGCAGGGCC
ACTATGGGGGGGGGCAGGGAAGC-CCCCCTATCCCTGCCAGTGCAGGGCC
ACTATGGGGGGGGGCAGGGAAGC-CCCCCTATCCCTGCCAGTGCAGGGCC
ACTATACGGGGGAGCAGAGAAGCCCCCCCTATCCCTGCCAGTGCAGGGCC
ACTATACGGGGGAGCAGAGAAGCCCCCCCTATCCCTGCCAGTGCAGGGCC
TCTCTGTGTCGAACGCAAGCAGC-CCCT-TATCCCTGCCGATGCCGA-CC
TCTCTGTGTCGAACGCAAGCAGC-CCCT-TATCCCTGCCGATGCCGA-CC
TCTCTGTGTCGAACGCAAGCAGC-CCCT-TAT-------GATGCCGA-CC
TCTCTGTGTCGAACGCAAGCAGC-CCCT-TATCCCTGCCGATGCCGA-CC
TCTCTGTGAG-AAGCCAAGCAGCACACTCTATCCCTGCCAATGCCAAACC
-----GGGGGGAAGTCGAGCAA----------------------------
ACTCTGTGTGG-AGTCGTGCAG----------------------------
-----GTGGCAAAGCCGTGAAGCACCCTCTCTTCCTGCCAATATGGA-CC
ACTCTGTGCAGAAGCCAAGCAGCCCCCTCCACACCTGCCAATGCCGA-CC
AGTCTGTGAGGAAGCCGAGCAGC-CCCGCTATCTCTGCTGACGCGGAGCC
AGTCTGTGAGGAAGCCAAGCAGC-CCCGCTATCTCTGCTGACGCGGAGCC
ATAGTGTGAG-AAGCCAGGCAGCTCCC-CTATCCCTGCCCATGCCAAAAC
AGTGTGTGAG-AAGCCAGGCAGC-CCCCCTATCCCTGCCCATGCCAAAAC
ATAGTGTGGGAAAGCCAGGCAGC-CCCCCTATCCCTGCCCATGCCAAAAC
ACTGGGTGTG-AAGCCAAGCAGCTCCCCCTATCCCTGCCAATGCAGAACC
ACTGGGTGTG-AAGCCAAGCAGCTCCCCCTATCCCTGCCAATGCAGAACC
ACTGGGTGTG-AAGCCAAGCAGCTCCCCCTATCCCTGCCAATGCAGAACC
AGTCTGTGAGGAAGCCAAGCAG-CCCCGCTATCTCTGCTGACGCGGAGCC
ACTGGGTGTG-AAGCCAAGCAGCTCCCCCTATCCCTGCCAATGCAGAATC
ACTGGGTGTG-AAGCCAAGCAGCTCCCCCTATCCCTGCCAATGCAGAACC
TCTGCGTGTGGAAGCCAAGCAG----CTCTATCGCTGCCAATGCTGAACC
GCTCTGCGGGGAAGCCAAGCGCCTCACTTTACCCCTGCCGTTGCCAATCT
ACTCTGTGGGGAGGCCAACCAACCAACCCTATCTCTGACGGTGCCGAGCC
-----GTCAAGGGACCAGGCAGCCCCCCCCATCCCTGCCAATGCCCAGCC
ACTCTGTGTGGGAGCCGGGCAGCCCCCTCCATCCCTGCCAATGCCCAGCC
ACTCTGTGTGGGAGCCGGGCAGCCCCCTCTATCCCTGCCAATGCCCAGCC
ACTCTGTGTGGGGGCCGGGCAGCCCCCTCTATCCCTGCCAATGCCCAGCC
ACTCTGTGGGAAAGCCGGGCAGCCCCCTCCATCCCTGCCAATGCCGAACC
ACTCCGTGAGGCAGCCCAGCAGCCCCCACCAACCCTTCCAGTGCCGAACC
ACTCCGTGAGGCAGCCCAGCAGCCCCCACCAACCCTTCCAGTGCCGAACC
ACTCCGTGAGGCAGCCCAGCAGCCCCCACCAACCCTTCCAGTGCCGAACC
ACTCCGTGAGGCAGCCCAGCAGCCCCCACCAACCCTTCCAGTGCCGAACC
ACTCCGTGAGGCAGCCCAGCAGCCCCCACCAACCCTTCCAGTGCCGAACC
ACTCCGTGAGGCAGCCCAGCAGCCCCCACCAACCCTTCCAGTGCCGAACC
ACTCCGTGAGGCAGCCCAGCAGCCCCCACCAACCCTTCCAGTGCCGAACC
ACTCTGTGA--GAGCCGCGAAGCTCCCTCCATTCCTGCCAATGCCGAACG
-------GA--AACGCCGGAAGCTCC-TCCATTCCTGCCAATGCCCAGCC
ACTCTGTG-GGGAGCCGGGCGGCTCCTTCCATCCCTGCCAATGCCGAACG
ACTCTGTG-GGGAGCCGGGCAGCTCCTTCCATCCCTGCCAATGCCGAACG
ACTCTGTGAGGCAGCCCAGCAGCCCCCTATAACTTTGCCACTGCCGAACC
ATTCTGTGAGGCAGCCCAGCAGC-CCCTATAACTTTGCCACTGCCGAACC
ACTCTGGGAGGGAGCCCAGCAGC-CCCTATAT-TCTGCCAATGCAGAGCC
ACTCTGGGAGGGAGCCCAGCAGC-CCCTATAT-TCTGCCAATGCAGAGCC
CGTCGGTATGGAAGCCAGGGTG----------------------------
----------------------CACCC-CTATCCCTGCGGATGCAGAGCT
TCTCCGTGGGAAAGCCGGGCGGCTCCTTCCATTCCTGCCAATGCCCAGCC
TCT---------------------CCC--CATCCCTGCCAATGCTGCACC
TCT---------------------CCC--CATCCCTGCCAATGCTGCACC
TCT---------------------CCC--CATCCCTGCCAATGCTGCACC
GCTCT-----------------CTCCTTCCATTCCTGTCAATGCGGGGCC
ACACATTAAGGAAAAAAGGTAG-GCCC---ATCCCTACCGGTGCCGAACC
ACTCTGTGATAAAGCCAAGCAGCCCCCTCTCT-CTTGCCAGTGCCGAATC
ACTCTGTGCGGAGGCCGCGCAGCCCCCTCTATCCCTGCCACTGCCG-GCC
ACTCTGTGCGGAGGCCGCGCAGCCCCCTCTATCCCTGCCACTGCCG-GCC
ACTCTGTGCGGAGGCCGCGCAGCCCCCTCTATCCCTGCCACTGCCG-GCC
-----GTGGGGGAGCCCAGCAG--CCC-CCACCCCTACCGGTGCCGAACC
-----GTGGGGGAGCCCAGCAG--CCC-CCACCCCTACCGGTGCCGAACC
-----GTGGGGGAGCCCAGCAG--CCC-CCACCCCTACCGGTGCCGAACC
ACCGTCTGGGGAAGCCCAGCAGCTCCCTCCTT------------------
AGTCTATGTAGAAGCCAGGCAGCTTT-TCTATCCCAGCCAGTGCACAGCC
ACTCTGTGTGGATGCGAAGGAG--CCCTCTATCCCTGCGAATGCCCAGC-
AGTTCGTGGGGAAGCCAAGCAGCACCCACAATCCTTGCCCACGCAGAACC
ACTTTGGGAG-AAGCCAGACGGC-CCCTCTATCCTTGCCAATGCCGCGCC
ACTCTGCGAGGAAACCAAGCAGCACCCTATGTCGCTGCCACTGCAGAACC
ACTCTGCGAGGAAACCAAGCAGCACCCTATGTCGCTGCCACTGCAGAACC
-----GTGAGGAAACCAAGCAGCTCCCTATGTCGCTGCCACTGCAGAACC
-----GTGAGGAAACCAAGCAGCACCCTATGTCGCTGCCACTGCAGAACC
ACTTTGGGAG-AAGCCAGACGGC-CCCTCTATCCTTGCCAATGCCGCGCC
----------------------C-CCCTCTATCCCTGTCAATGCCAAACC
ACTCT-TGAGTAAGA-AGCCCG-----TCTATCCCTGCCAATGCCCAGC-
ATTCTGTGAGGAGGCCAGGCAG----------------------------
-----GCGAGGAGGCCCGGCTGC-CCCTCTATCCCTGCCCATGCCGAGCC
ACTCTGTGGGGAGGCCCGGCTGC-CCCTCTATCCCTGCCCATGCCGAGCC
ACTCTGTGGGGAAGCCATGCGGATCCTTCTACCCCTGCCGATGCCGCGCC
-----------------------TCCACCTATCCATGCCAATGCCGAGCC
-----------------------TCCACCTATCCATGCCAATGCCGAGCC
-----------------------TCCACCTATCCATGCCAATGCCGAGCC
-----------------------TCCACCTATCCATGCCAATGCCGAGCA
-----------------------TCCACCTATCCATGCCAATGCCGAGCA
ACTTTGTGAGGGAGCTCGTGAGCTCC-GCCATGCCTTTCAATGCCGAGCC
--------------------------------ATCGGCACATACTG-GTC
--------------------------------ATCGGCACATACTG-GTC
CCTCTGTGAG-ATTCCAGGCGG--CCATCTATCCCGGCTCATGCCGAACC
CCTCTGTGAG-ATTCCAGGCGG--CCATCTATCCCGGCTCATGCCGAACC
GCTCCGCGTGGGGGCCGCGGTGCCCCCGCCACTCCTTCCAACGCCGAGCC
AGTGTGTGAGGAAGCCGGGCAGCTCCCTCTGTCCCTGCCAATGCTGAGGA
-----GGGTGGGGGCCGCGGTGCCCCCGCCACTCCTTCCAACGCCGGGCC
ACGCTGTGGGGAACCAGAGCAG----------------------------
ATTCCGTGGGGGGGCATACAGGCCCCCACTATCCCTGCCGATGCCGAGCC
ATTCCGTGGGGGGGCATACAGGCCCCCACTATCCCTGCCGATGCCGAGCC
ACTCTGTGGGGAAGCCATGCGGATCCTTCTACCCCTGCCGATGCCGCGCC
ACTCTGTGGGGAAGCCATGCGGATCCTTCTACCCCTGCCGATGCCGCGCC
ACTCTGTGGGGCAGCCCCACAGATCCTTCTACCCCTGCCGATGCCGCGCC
ACTCTGTGGGGCAGCCCCACAGATCCTTCTACCCCTGCCGATGCCGCGCC
ACTCTGTGGGGAAGCCGCGCAGC-CCC-CTGTCCCCGCCAATGCCCA-CC
ACTCTGTGGGGAAGCCGCGCAGCCCCCACCACCCCCGCCAATGCCCA-CC
ACTCTGTGGGGAAGCCGCGCAGCCCCCACCACCCCCGCCAATGCCCA-CC
ACTCTGTGGGGAAGCCGCGCAGC-CCC-CTATCCCCGCCAATGCCCA-CC
ACTCTGTGGGGAAGCCGCGCAGCTCCCACCACCCCCGCCAATGCCCA-CC
ACTCTGTGGGGAAGCCGCGCAGCCCCCATTACCCCCGCCAATGCCCA-CC
ACTCTGTGGGGAAGCCGCGCAGCCCCCATTACCCCCGCCAATGCCCA-CC
----------------------CTCCACCTATCCATGCCAATGCCGAGCC
ACTCTGTGGGGAAGCCGCGCAG--CCC-CCATCCCCGCCAATGCCCA-CC
AGTGTGTGAG-AAGTCAGGCAACCCCCCCTATCCCTGCCGATGCTGAGCC
ACTCTGTGAAGAAGCCAAGCAGC-CCCTCTATTCCTGCCAATGCCGAGCC
ACTCTGTGAAGAAGCCAAGCAGC-CCCTCTATTCCTGCCAATGCCGAGCC
ACTTAGTGTTGAAGCCGACCATCACCCTCTGTCCCTTCCAATGCCGAGCC
GCTCTGCGCGGAAGCCAAGCAGCCCCCACTAACCCTGCCAATGCCAAACC
GCTCTGCGCGGAAGCCAAGCAGCCCCCACTAACCCTGCCAATGCCAAACC
GCTCTGCGCGGAAGCCAAGCAGCCCCCACTAACCCTGCCAATGCCAAACC
GCTCTGCGCGGAAGCCAAGCAGCCCCCACTAACCCTGCCAATGCCAAACC
ACTCTCTGGGGGAGCCTAGCGGC-CCCTCTCT------------------
ACTCTCTGGGGGAGCCTAGCGGC-CCCTCTCT------------------
--------------------------------------------------
--------------------------------------------------
ACTCCGT-ATTGGACCCAGCAGCCCACACCAT----GCCAATGCCAAGCC
ACAGAGTGAGGAAGCCGAGCAGCTTCCTCTCTTCCTGCCAATGCTGAACC
-----GTGGGGTAGCCAAGCCGCACCATCTAGCCCTGCCAATGCCGAACC
ACTCTGTGGGGAGGCCGAGCAGCCCCCTCTATCCCCGCCAAGGCCAACCC
ACTCTGTGGGGAGGCCGAGCAGCCCCCTCTATCCCCGCCAAGGCCAACCC
ACTCTGTGGGGAGGCCGAGCAGCCCCCTCTATCCCCGCCAAGGCCAACCC
ACTCTGTGGGGAGGCCGAGCAGCCCCCTCTATCCCCGCCAAGGCCAACCC
ACTCTGTGGGGAGGCCGAGCAGCCCCCTCTATCCCCGCCAAGGCCAACCT
ACTCTGTGGGGAGGCCGAGCAGCCCCCTCTATCCCCGCCAAGGCCAACCC
ACACTGTGGGGAAGCCGGGCACCTCC-ACTAACACTGTCAATGTCAAACC
GCTGCGCGAGGAAGCCAAGCAGCACC--CTCTCTCTGTCAACGCCGAACC
GCTGCGCGAGGAAGCCAAGCAGCACC--CTCTCTCTGTCAACGCCGAACC
ACTCTGAGAGGAAGCTGAGAAGCGCACTCTATCCGTGTCAATGTCCAACC
ACTCTGAGAGGAAGCCGAGAAGCGCACTCTATCCGTGTCAATGTCGA-CC
ACTCTGAGAGGAAGCCGAGAAGCGCACTCTATCCGTGTCAATGTCGA-CC
ACTCTGTGAGGAAGCCACGCAGCCCCCT-TATCCCTCCCAATAGTGAACC
TCTCAGTGGGGAAGGCGAGCAGCGCCCCCTGCCCCTGTCAATGCACAACC
TCTCGGTGGGGAAGCCGAGCAGCGCCCCCTACCCCTGTCAATGCACAACC
TCTCGGTGGGGAAGCCGAGCAACGCCCCCTATCCCTGTCAATGCACAACC
TCTCAGTGGGGAAGCCGAGCAGCGCCCCCTACCCCTGTCAATGCACAACC
TCTCTGTGAGGAAGCCAAGCAGCCCCCTCTTTCCCTGCGAATGCGCAACC
ACTCCGCGGGGAAGCCAGGCTGCTCCCCCTATCCCCGTCCGTGCCGGACC
TCTCTGTGGGGAGGCCAAGCAGCTCCTTCTGTTTCTGCTAATGCCGAGCT
TCTCTGTGGGGAGGCCAAGCAGCTCCTTCTGTTTCTGCTAATGCCGAGCT
TCTCTGTGAGGAAGCCAAGCAGCCCCCTCCATCCCTGCGAATGCGCAACC
TCTCTGTGAGGAAGCCAAGCAGCCCCCTCCATCCCTGCGAATGCGCAACC
TCTCTGTGAGGAAGCCAAGCAGCCCCCTCCATCCCTGCGAATGCGCAACC
ACTC-GC-AGGAAGCCAGACAG-CCCTTGTATCCCTGCCAATGCTGAACC
ACTCAGTGAAAAAGCCAGACAGGCCCCTGTATCCCTGCCAATGCTGAACC
ACTCTGCACGGAAGCCAGGCAGC-CCC-CTATCCCTGTCAATGCCGAGCA
ACTCTGCGGGGAAGCCAGGCTGCTCCCCCTATCCCCGTCCGTGCCGA-CC
-------CTGGAATGCAAGCGG-CCCCCCTCTGCGTGTCAATGCCGGGCC
GCTCTCTGGGGAGGCCAAGTAGCCCCCACTATCCCAGCCACTGCTGAGAT
ACTCTGTGGGGGAGCCAAGCAG--CCATCTATTTCTTCCAACACCGA-CC
ACTCTGTGGGGGAGCCAAGCAG--CCATCTATTTCTTCCAACACCGA-CC
ACTCC--CAA-AAGCCAAGACG--CCATCTTTTCCTGTCAATGCCGAGCC
ACTCCGCGGGGAAGCCAGGCTGCTCCCCCTATCCCCGTCCGTGCCGA-CC
ACTCTGCGGGGAAGCCAGGCTGCTCCCCCTATCCCTGTCCGTGCCGA-CC
GTTCTGTGAA-AAGGACAGAAGCTCC-T-TTTCTGTGCCAATGTTGA-CC
ACTCCGCGGGGAAGCCAGGCTGCTCCCCCTATCCCCGTCCGTGCCGA-CC
--------------------------C-CTATTCCGGCCAATGCACAGCC
ACTCGGTTGGCAAGCCGGGCAGCTCCCTCTATTCCGGCCAATGCACAGCC
ACTCGGTTGGCAAGCCGGGCAGCTCCCTCTATTCCGGCCAATGCACAGCC
ACTCGGTTGGCAAGCCGGGCAGCTCCCTCTATTCCGGCCAATGCACAGCC
ACTCGGTTGGCAAGCCGGGCAGCTCCCTCTATTCCGGCCAATGCACAGCC
ACTCCGTGGGGAAGCCGAGTAG---CCCCTTTTCGAGC-AATGCTGCGTC
ACTCTGTGGGGAGGCCGGGCAGCACCCTCTATCCCTGCCCATGCCGACCC
TCTGTGTGGGGAGGCCAACCAGATCCCTCTATCCCTGCCCATGCCAATCC
ACTCTGTGGGGAGGCCAGGCAGCACCCTCTATCCCTGCCCATGCCGACCC
ACTCTGTGGGGAGGCCAGGCAGCACCCTCTATCCCTGCCCATGCCGACCC
ACTCTGTGGGGAGGCCAGGCAGCACCCTCTATCCCTGCCCATGCCGACCC
ACTCTGTGTCGAGGCCAAACAGCACTCTCTAACCTTGCCAGTGCCGAACC
CCTCTGTGAGGAAGCCGATGAGCTCCCTCCATCCCTACCAATGTCGAACC
TC-CT---------------------------CCCTACCAATGTCGAACC
GCTTTCTGGGAAAGCCGAGCAG--CCC-CTGTCCCAGCCACTGTCGACCC
ACACTGTGGGGAAGCCAGGAAGCTCCC-CCATCCCCGCGAATGCCGAACC
ACTCTGTGTCGAGGCCAAACAGCACCATCTAACCTTGCCAGTGCCGAACC
ACTCTGTGTCGAGGCCAAACAGCACTCTCTAACCTTGCCAGTGCCGAACC
GCTCTGTGCGGAAGCCAGTGAGCTCCCTGGAGCCCTCCCCCTCCCTCCCC
GCTCTGTGCGGAAGCCAGTGAGCTCCCTGGAGCCCTCCCCCTCTCGCCCC
ACTCTGTGCGGAAGCCAGTGAGCTCCC-CGACCCCTGCCCCTCTCGCCCC
ACTCTGTGCGGAAGCCAGTGAGCTCCC-CGACCCCTGCCCCTCCCTCCCC
ACTCTGTGCGGAAGCCAGTGAGCTCCCTGGAGCCCTCCCCCTCCCTCCCC
CCTCTGTGAGGAAGCCGATGAGCTCCCTCCATCCCTACCAATGTCGAACC
CCTCTGTGAGGAAGCCGATGAGCTCCCTCCATCCCTACCAATGTCGAACC
CCTCTGTGAGGAAGCCGATGAGCTCCCTCCATCCCTACCAATGTCGAACC
ACCCTTTGCGGAAGCCGCGCAGCCCCCTCCATTCCTGCGACTGCCGGGTC
ATTCTTGGTGGAAGCCGAGCAGCTCCCTCTGCCCCGGCCACTGTCG-GCC
ATTCTTGGTGGAGGCCGAGCAGCTCCCTCTGCCCCGGCCACTGTCG-GCC
ATTCTTGGTGGAAGCCGAGCAGCTCCCTCTGCCCCGGCCACTGTCG-GCC
ATTCTTGGTGGAAGCCGAGCAGCTCCCTCTGCCCCGGCCACTGTCG-GCC
ATTCTTGGTGGAAGCCGAGCAGCTCCCTCTGCCCCGGCCACTGTCG-GCC
ATTCTTGGTGGAAGCCGAGCAGCTCCCTCTGCCCCGGCCACTGTCG-GCC
T-TTTTTGAGGAATCTAAGAAGC-CCCTC---CCCGGC-AACGTGTCGTC
ACTCCGTGGGGAAGCCGAGTAG--CCC-CTTTTCGAGC-AATGCTGCGTC
ACTCCGTGGGGAAGCCGAGTAG--CCC-CTTTTCGAGC-AATGCTGCGTC
ACTCTGTGGGGAGGCCAGGTGG--CCCTCTGTTCCAGCCACTGTCG-GCC
ACTCTGTGGGGAAGCCAAGCAGCCCCCTACATCCCTACCAATGCCGAACC
ACTCTGTGCGAAAGTCAGGCAGCCCCCACTACCCCTGCCAGTGCCGAACC
ACTCTGTGCGAAAGTCAGGCAGCCCCCACCCCCCCTGCCAGTGCCGAACC
ACTCTGTGCGAAAGTCAGGCAGC-CCC-CCACCCCTGCCAGTGCCGAACC
ACTCTGTGCGAAAGTCAGGCAGC-CCC-CCACCCCTGCCAGTGCCGAACC
GCTCTGTG-GGAAGCGATCCAGCCCCCCCAACGCCTGCCACTGCCCAGCC
GCTCTGTG-GGAAGCGATCCAGCCCCCCCAACTCCTGCCAATGCCCAGCC
GCTCTGTG-GGAAGCGATCCAGCCCCCCCAAACCCTGCCAATGCCCAGCC
GCTCTGTG-GGAAGCGATCCAGCCCCCCCAACGCCTGCCAATGCCCAGCC
GCTCTGTG-GGAAGCGATCCAGCCCCCCCAACGCCTGCCAATGCCCAGCC
GCTCTGTG-GGAAGCGATCCAGCCCCCCCAACGCCTGCCAATGCCCAGCC
GCTCTGTG-GGAAGCGATCCAGCCCCCTCAACCCCTGCCAATGCCCAGCC
GCTCTGTG-GGAAGCGATCCAGCCCCCCCAACGCCTGCCAATGCCCAGCC
GCTCTGTG-GGAAGCGATCCAGCCCCCTCAACGCCTGCCAATGCCCAGCC
ACTCTGTGGGGAAGCCAAGCAGCCCCCTACATCCCTACCAATGCCGAACC
ACTCTGTGGGGAAGCTAAGCAGTTCCCTCTACCCCTGCCAGTGCCGCCCC
ACTCTGTGGGGAAGCTAAGCAGTTCCCTCTACCCCTGCCAGTGCCGCCCC
ACTCTGTGCGAAAGTCAGGCAGCCCCCACCACCCCTGCCAGTGCCGAACC
TCTCT---------------------------CCCTGCCAATGCCGAACC
ACACCGTGCG-AGTCCGGGCAGCTCCCTCTCTCCCTGCCAGTGCCGAGCC
ACACCGTGCG-AGTCCGGGCAGCTCCCTCTCTCCCTGCCAGTGCCGAGCC
ACACCGTGCG-AGTCCGGGCAGCTCCCTCTCTCCCTGCCAGTGCCGAGCC
ACACCGTGCG-AGTCCGGGCAGCTCCCTCTCTCCCTGCCAGTGCCGAGCC
ACACCGTGCG-AGTCCGGGCAGCTCCCTCTCTCCCTGCCAGTGCCGAGCC
-----GTGGGGAAGCCAGGCGGCTCCCTCTCTCCCTGCCAGTGCCGAGCC
-----GTGGGGAAGCCAGGCGGCTCCCTCTATCCCTGCCAGTGCCGAGCC
ACACCGTGCG-AGTCCGGGCAGCTCCCTCTATCCCTGCCAGTGCCGAGCC
ACACCGTGCG-AGTCCGGGCAGCTCCCTCTATCCCTGCCAGTGCCGAGCC
ACACCGTGCG-AGTCCAGGCGGCTCCCTCTATCCCTGCCAGTGCCGAGCC
ACACCGTGCG-AGTCCGGGCAGCTCCCTCTATCCCTGCCAGTGCCGAGCC
ACACCGTGCG-AGTCCAGGCGGCTCCCTCTATCCCTGCCAGTGCCGAGCC
GCTCGGTATGGAAGCTAAGCAG-GCCC-CCATCCCTGTCAACGCCAAACC
ACTCTGTGGGGGAGTCAAGCAC----------------------------
TCTCCATGAGGAAGCCAAGCCGCTCCCTCCATCCCTGCCAATGCCGAACC
TCTCCATGAGGAAGCCAAGCCGCTCCCTCCATCCCTGCCAATGCCGAACC
------------AGCGGTTGCGCTCCCTCCATCCCTGCCAATGCCGAACC
ACTCTGTAGGGAAGCCAAGCACCCCTCTCTATCCCTGCCAATGCCGAACC
--------------------------------------------------
ACTTTGTGTGGGGTTTGAGCAGCTTC-TCTATCCCCGCCAATGTCCAACC
GCTCTGTGAGGAAGCCAAGCAACCCCCCCTACTTTCGCCAACGCCGAACC
GCTCTGTCACGTAGCGAAGCAGACCCCTCTATCTCTGCCAATGCGAAGCC
TCTCTGTGGGGAAGCCAAGCAG--CCC-CTACTCCTGCCACTGCAAA-CC
ACTCTGTGAGGAAGCCAGGCAGCTCCCTCCAGCCCTGCCATTGCCGA-CC
ACTCTGTGAGGAAGCCAGGCAGCTCCCTCCAGCCCTGCCATTGCCGA-CC
ACTCTGTGAGGAAGCCAGGCAGCTCCCTCCAGCCCTGCCATTGCCGA-CC
ATCCTCTTAGGAAACAACGCAGCTCCCACTATGAATGACGATGCCAAG-A
ATCCTCTTAGGAAACAACGCAGCTCCCACTATGAATGACGATGCCAAG-A
ATCCTCTTAGGAAACAACGCAGCTCCCACTATGAATGACGATGCCAAG-A
GCACTGTCACGTAGCGAAGCAGCACCCTCTATCTCTGCCAATGCGAAGCC
--------------------------------------------------
GCTCTGTCACGTAGCGAAGCAGCACCCTCTATCTCTGCCAATGCGAAGCC
GCTCTGTCACGTAGCGAAGCAGCACCCTCTATCTCTGCCAATGCGAAGCC
GCTCTGTCACGTAGCGAAGCAGCACCCTCTATCTCTGCCAATGCGAAGCC
-----GTGTGGGTGCCAGAC-GCTTCCTCTATCCCTGCCAATGCCGAACC
-----GTGTGGGTGCCAGAC-GCTTCCTCTATCCCTGCCAATGCCGAACC
ACTCTGTGGGGAAGCCAGGCAGC-CCTTCTACCCCTGCCAATGCCGAGCC
ACTCTGTGGGGAAGCCAGGCAGC-CCTTCTACCCCTGCCAATGCCGAGCC
ACTCTGAGTCGAATCCGAGCAGCTCCCCCTTTCCATGCCAATGCCGAACC
ACTCTGTGGAGAAGCCGCGCCGCCCCCACCATCCCTGCCAATGCCGAGCC
ACTCTGTGGAGAAGCCGCGCCGCCCCCTCCATCCCTGCCAATGCCGAGCC
ACTCTGTGGAGAAGCCGCGCCGCACCCTCCATCCCTGCCAATGCCGAGCC
ACTCTGTGGGGAAGCCAAGCAG--CCC-CTACTCCTGCCACTGCAAA-CC
ACTCTGTGGGGAAGCCAAGCAG--CCC-CTACTCCTGCCACTGCAAA-CC
ACTCTGTGGGGAAGCCAAGCAG--CCC-CTACTCCTGCCACTGCAAA-CC
ACTCTGTGGGGAAGCCAAGCAG--CCC-CTACTCCTGCCACTGCAAA-CC
ACTCTGTGGGGAAGCCAAGCAG--CCC-CTACTCCTGCCACTGCAAA-CC
ACACTGTGAGGAGGCCAGGCAGCTCC--CCATCTCTGCCAATGCCAAATC
ACGCTGCGAG-AAGCTAAGCAGCCCCCCCCATCCTTGCCAATGCCGGTCC
ACGCTGTGGGGAAGCTACGCAGCCCCCACTATCCCCGCCAACGCCGAGCC
ACTCTGCGCGGGAGGCGGGCACCCCCCTCCATCGCTGCCAAGGCCGAACC
ACTCTGTGAGGAAGCCAAGCAGCTCCCTCTATCCCTGACAATGCCGTACC
ACTCTGTGAGGAAGGCAATCA-C-CCC-CTGTCCCTGCCAATGCCGAACA
ACTCTGTGAGGAAGGCAATCA-C-CCC-CTGTCCCTGCCAATGCCGAACA
ACTCTGTGAGGAAGGCAATCA-C-CCC-CTGTCCCTGCCAATGCCGAACA
ACTCTGTGGGGAAGGCAATCA-C-CCC-CTGTCCCTGCCAATGCCGAACA
ACTCTGTGAGGAAGGCAATCA-C-CCC-CTGTCCCTGCCAATGCCGAACA
ACTCTGTGAGGAAGGCAATCA-C-CCC-CTGTCCCTGCCAATGCCGAACA
ACGTTGTGTGGAAGGCAATCA-C-CCC-CTGTCCCTGCCAATGCCGAACA
ACCCTGTGGGGAAGCTAAGCAG-GCCCCCCATCCCTGCCAATGCTGAACC
ACCCTGTGGGGAAGCTAAGCAG-GCCCCCCATCCCTGCCAATGCTGAACC
ACTCTGTGCTGAAGCCAAGTAGCTCCGTCTATGCCTGCCCGTGCCCA-CC
ACCCTGTGGGGAAGCTAAGCAG--CCCCCCATCCCTGCCAATGCTGAACC
ACGCTGTGGGGAAGCTACGCAGCCCCCACTATCCCCGCCAACGCCGAGCC
ACGCTGTGGGGAAGCTACGCAGCCCCCACTATCCCCGCCAACGCCGAGCC
ACGCTGTGGGGAAGCTACGCAGCCCCCACTATCCCCGCCAACGCCGAGCC
ACGCTGTGGGGAAGCTACGCAGCCCCCACTATCCCCGCCAACGCCGAGCC
ACGCTGTGGGGAAGCTACGCAGCCCCCACTATCCCCGCCAACGCCGAGCC
ACTCTGTGGGGAAGCCAAGCAGCTC--TCTATCCCTGCCGATGCCGAGCC
ACTCTGTGGGGAAGCCAAGCAGCTC--TCTATCCCTGCCGATGCCGAGCC
ACTCTGTGGGGAAGCCAAGCAGCTC--TCTATCCCTGCCGATGCCGAGCC
ACTCTGTGGGGAAGCCAAGCAGCTC--TCTATCCCTGCCGATGCCGAGCC
ACTCTGTGGGGAAGCCAAGCAGCTC--TCTATCCCTGCCGATGCCGAGCC
ACTCGGTGAGAAAGCCAAGCAG--CCC-CGATCCTTGCCAATGCCGA-CC
ACTCGGTGAGAAAGCCAAGCAG--CCC-CGATCCTTGCCAATGCCGA-CC
ACTCTGCGGGGAGGCCGGGCACCCCCCTCCATCGCTGCCAATGCCGAACC
--------------------------------------------------
--------------------------------------------------
ACCCTGTGACGAAGCCAAGCATCTCCCTCTATCCCTCCCGATGCTGGGCC
ACCCTGTGGGGAAGCTAAGCAGCCCCCT-CATCCCTGCCAATGCTGAACC
CCTCTGTGGGGAAGCTAAGCAGCTCCCTCTATCCCTGCTAATGTCGAATG
ACTCT-TCAGGAGGCCAGGCAGCTCCCCCTATCCCCGACCACGCCGAGCC
ACTCT-TCAGGAGGCCAGGCAGCTCCCCCTATCCCCGACCACGCCGAGCC
ACTCT-TCAGGAGGCCAGGCAGCTCCCCCTATCCCCGACCACGCCGAGCC
ACTCTGTGGGGAAGCCAAGCAGCTCTCCCTATCCCTGCCGATGCCGAGCC
CATCTGTGGGGAAGCCAAGCAGCTCTCCCTATCCCTGCCGATGCCGAGCC
ACTCTGTGAG-AAGCCAAGCAGC-CCCCCTATCCCGGTCAATGCAGA-CC
ACTCTGTGGG-AAGCCAAGCAGCTCTCCCTATCCCTGCCGATGCCGAGCC
ACTCTGTGGG-AAGCCAAGCAGCTCTCCCTATCCCTGCCGATGCCGAGCC
ACTCTGTGAG-AGGCCCAGCAGCCCCCTCTATTCCTGCCAATGCGGACCC
ACTCTGTGAG-AGGCCCAGCAGCCCCCTCTATTCCTGCCAATGCGGACCC
ACTCTGTGAG-AGGCCCAGCAGCCCCCTCTATTCCTGCCAATGCGGACCC
GCTCTGTGCGCAAGCCACGCAG-CCCCTCTCTCCCTACCAATGCCGAGCC
ACCATGCGGGGAAGCCGAGCAGCTCCC-CTATCCCGGCCAATGCCGAGCC
ACTC-GCG-GGAAGCCAGGCAGCCCCCCCTATCACCGCCATGGCGGAGCT
GCTC-GCG-GGAAGCCAGGCAGCCCCCCCTATCACCGCCATGGCGGAGCT
GCTC-GCG-GGAAGCCAGGCAGCCCCCCCTATCACCGCCATGGCGGAGCT
ACTC-GCG-GGAAGCCAGGCAGCCCCCCCTATCACCGCCATGGCGGAGCT
ACTC-GCG-GGAAGCCAGGCAGCCCCCCCTATCACCGCCATGGCGGAGCT
ACTC-GCG-GGAAGCCAGGCAGCCCCCCCTATCACCGCCATGGCGGAGCT
ACTC-GCG-GGAAGCCAGGCAGCCCCCCCTATCACCGCCATGGCGGAGCT
GCTC-GCG-GGAAGCCAGGCAGCCCCCCCTATCACCGCCATGGCGGAGCT
TCTCTGCGAGGAAGTCGAGCCGCTCCCTCTATCGCTGCCGGTCCCAAGCC
TCTCTGCGAGGAAGTCGAGCCGCTCCCTCTATCGCTGCCGGTCCCAAGCC
TCTCTGCGAGGAAGTCGAGCCGCTCCCTCTATCGCTGCCGGTCCCAAGCC
TCTCTGCGTGGGGCCCAGACAG--CCC-CTATCGCTGCCGGTCCCAAGCC
TCTCTGCG-GGGACCCAGGCAG-ACCC--TAGATTTGCCAACGCCGAACC
TCTCTGCG-GGGACCCAGGCAG-ACCC--TAGATTTGCCAACGCCGAACC
TC-CT------------------TCG-TCTCTCCCTGGCAATGCCGAGCC
ACCATGCGACGAAGCCGAGCAGCTCCCT-TATCCCGGACAATGCCGAGCC
ACCATGCGGGGAAGCCGAGCAGCTCCC-CTATCCCGGCCAATGCCGAGCC
ACCATGCGGGGAAGCCGAGCAGCTCCC-CTATCCCGGCCAATGCCGAGCC
ACTCGGCG-GGAAGCCAGGCAG-CCCCCCTATCACCGCCATGGCGGAGCT
GCCCTTTGAGAAAGCCAGGGAG--CCC-CTATCACCGCCATGGCGGAGCT
ACTCTGTCAGGAAGCCAGGCGGCACCC-CTATCTCTGCCAATGCCGAGCT
ACTCTGTCAGGAAGCCAGGCGGCACCC-CTATCTCTGCCAATGCCGAGCT
ACTCTGTCAGGAAGCCAGGCGGCACCC-CTATCTCTGCCAATGCCGAGCT
TCTCTGCGAGGAAGTCGAGCCGCTCCCTCTATCGCTGCCGGTCCCAAGCC
TCTCTGCGAGGAAGTCGAGCCGCTCCCTCTATCGCTGCCGGTCCCAAGCC
TCTCTGCGAGGAAGTCGAGCCGCTCCCTCTATCGCTGCCGGTCCCAAGCC
TCTCTGCGAGGAAGTCGAGCCGCTCCCTCTATCGCTGCCGGTCCCAAGCC
ACTCTGTGAGGAAGCCGAGCAGCTCCCTCTATCCCTGCCAATGCCGAGCA
ACTCTGTGCGGAAGCCAAGCAACCCTCTCTATCCCTGCCACTGCAGAACC
----------------------ATCCCTATATCCTTGCCAGTGCCGAGCC
ACTCGGTGAGGAGGCCAGGCGCCCCCCTCTAACCCAGCCAATGCCGAGCC
ACTCTGTGCGGAAGCCACGCAGCTCCTTCTCTCCCTGCCAATGCCGAGCC
ACTCTGTGCGGAAGCCACGCAGCTCCTTCTCTCCCTGCCAATGCCGAGCC
ACTCTGTGCGGAAGCCACGCAGCTCCTTCTCTCCCTGCCAATGCCGAGTC
ACTCTGTGCGGAAGCCACGCAGCTCCTTCTCTCCCTGCCAATGCCGAGCC
GCTCTGTGCGCAAGCCACGCAGCTCCTTCTCTCCCTGCCAATGCCGAGCC
GCTCTGTGCGCAAGCCACGCAGCTCCTTCTCTCCCTGCCAATGCCGAGCC
ACTCTGCGAGGAAGCCCAGCAGCTCC---TATCCTTGCCAACGCCGCACC
ACTGTGTGAGGAAGCCGAGCAGCTCCCTCCATCCCTGCCAACGCAGAACC
ACTGTGTGAGGAAGCCGAGCAGCTCCCTCCATCCCTGCCAACGCAGAACC
--------------CCAAGCAGC-CCCCCTATCCTTGCCAGTGCCGAGCC
--------------CCGAGAAGCCCCCCCTATCCTTGCCAGTGCCGATCC
--------------CCAAGCAGCCCCCCCTATCCTTGCCAGTGCCGAGCC
--------------CCAAGCAGC-CCCCCTATCCTTGCCAGTGCCGAGCC
--------------CCAAGCAGC-CCCCCTAACCTTGCCAGTGCCGAGCC
A----GTGAGGGGACCAGGCAGC-CCCCCTATCCCTGTCCCTGCCGAGAC
A----GTGAGGGGACCAGGCAGC-CCCCCTATCCCTGTCCCTGCCGAGAC
A----GTGAGGGGACCAGGCAGC-CCCCCTATCCCTGTCCCTGCCGAGAC
ATGCAGTGAGAAGGTCAAGCAGCCCCCCCTAACCCTGCCAATGTCGAGCC
GCTCTGTGAGGAAGCCAAGCAGCACCCTCCATCCCTGCCAATGCCGAGCC
GCTCTGTGAGGAAGCCAAGCAGCACCCTCCATCCCTGCCAATGCCGAGCC
ACACAGTGAG-GAGCCGAGCCGC-CCCTCTATCCCTGCCAATGCTGCACC
ATTCTGTGAG-GAGCCGAGCTGCGCCC--TATCCCTGCCAATGCTGCACC
ACTCTCTGTGGACGCCAAGTAG-TCCC--TATCCCTGCCAGTGCAGAACC
--------------------------------------------------
ACTCTGGGAAGACGCCCAGCAGCTCCA--TATCCCTGTCCATGCCCAGTC
-----G-GAGCGGGTCAACCAG---CCTCTATCTCTGCTAATGCAAAACC
ACTGTGTGTAGAAGCCAAGCAACTCCCTCTATCCCTGCCACTGCAAA-CC
ACTCTGTGAGCGAGCCAGGCAGCTCCCTCTATCTCTGCCAATGCCGAGTC
ACTCTGTGAGCGAGCCAGGCAGCTCCCTCTATCTCTGCCAATGCCGAGTC
ACTCTGTGAGCGAGCCAGGCAGCTCCCTCTATCTCTGCCAATGCCGAGTC
TCTCTGTGGGGAGGCCAGTTAGATCCCTCTCTCCCTGCAAATGTCGAACC
TCTCTGTGGGGAGGCCAGTTAGATCCCTCTCTCCCTGCAAATGTCGAACC
ACTCTGTGCGGAAGCCAAAGCGCTCTCTCTATCTCTGCCAATGCTGAGTC
ACTCTGTGCGGAAGCCAAGCAGCTCCCTCCATCCCTGCCAGTGCTGAGCC
GCTCTGTGAGGAGGCCCAGCAGCTCCTTCTATCTCTGCCAATGCCGAGCC
GCTCTGTGAGGAGGCCCAGCAGCTCCCTCTATCTCTGCCAATGCCGAGCC
GCTCTGTGAGGAGGCCCAGCAGCTCCCTCTATCTCTGCCAATGCCGAGCC
GCTTTGTTAAGAAGCCACGCATC-CCCTCCATCTCTGCCAATACCGAGCC
ACACTGTGGGGCGGCCAAGCAGAGCCCTCTATCCCTGCCAATGCCGAGCT
ACTCTGTGCGGGAGCCAAGCAGCACCC-CTATCCCTGTCAAACCTGAACC
ACTCTGTGAG-GAGCCAAGCAGCACCC-CTATCCCTGTCAAACCTGAACC
AAACTGTGTCGCAGCCCAGCAGCCCCCTCTATCTCTGTCAATGCTGAACC
ACTCGGTTATGAGGCCAGACAGCCCCCTCCATCTCTG--AGTGCAGAGCC
TATCTGTGAGGGGCTTAAGCAGCTCCCTCTAACGCTGCCAATGTCAAACA
ACTCTGTCATGACGCCAGGCAGCTCCCTCGACCCCTGCGAGTGCAGAGCC
ACTCTGTGAGGGGGCCCAGCAGCCCCCTCTATCCCTGCCAATACCGAACC
ACTCC----------------------ACTATCCCTGCCAATGCCGAACC
ACTCC----------------------ACTATCCCTGCCAATGCCGAACC
----------------------CCCCCCCTTTCCCTGCCAATGCAGAGCA
ACCCGGTGGGAAAGACAGGCAG-TCCCTATATCCCTGCAAATGTCAAACC
CCCCTGTGAGGGAGCCGAGCAGGTCCCTCTACCCCTGCTAATGCTGCACC
CCCCTGTGAGGGAGCCGAGCAGGTCCCTCTACCCCTGCTAATGCTGCACC
CCCCTGTGAGGGAGCCGAGCAGGTCCCCCTACCCCTGCTAATGCTGCACC
ACTCTGCGAGGAAGCCAAGCAGCTCCC-CTATACCTTCCAACGCCGAAAC
ACTCTGTGCGGAAGCCAAGCAGCTCCCTCTCTCCCTGCCAGTGCTGAGCC
ACTCTGTGCGGAAGCCAAGCAGCTCCCTCTCTCCCTGCCAGTGCTGAGCC
ACTCTGTGAGGAAGCCGAGCGTTTCC---TGTCCCTGCGAATGCCGAGCC
ACTCTGTGAGGGAGCCGAGCTGC-CCCTCTATCCCTGCCGATGCTGCACC
ACTCTGTTTGGAAGCCGAGCCGCTCC-TCTATCCTTGCCAATGCTGCACC
ACTCTGTTTGGAAGCCGAGCCGCTCC-TCTATCCTTGCCAATGCTGCACC
ACTCTGTGTGGACGCCAAGTAG-TCCC--TATCCCTGCCAGTGCAGAACC
ACTCTGTGGGAAAGCCACGTAGCTCACTCTCACCCTGCCAATGCCGAGCC
ACTCTGTGGGAAAGCCACGTAGCTCACTCTCACCCTGCCAATGCCGAGCC
ACTCTGTGGGAAAGCCACGTAGCTCACTCTCACCCTGCCAATGCCGAGCC
ACTCTGTGGGGAAGCCACTAAGCCCCCACTAACCTTACCAATGCCGAGCT
ACTCGGTGGGGCGGCCAAGCAGCCCCCTCTATCCCTGCCAATGCCGAGCT
ACTCGGTGGGGCGGCCAAGCAGCCCCCTCTATCCCTGCCAATGCCGAGCT
ACTCTGTCGGGCAGCCCAGCAGCCCCCTCTATCTCTGCCAATGCTGAACC
ACTCTGTCGGGCAGCCCAGCAGCCCCCTCTATCTCTGCCAATGCTGAACC
CCTCTGTGGGGAAGCCAAGCAT--CCCTCTATTACTGCCAATACCGAGCC
GCTC-GTGAA-AAGCCAGGCAGCACCCTCTAGCCTTGCCCCTGCCGAGCC
GCTC-GTGAA-AAGCCAGGCAGCACCCTCTAGCCTTGCCCCTGCCGAGCC
GCTC-GTGAA-AAGCCAGGCAGCACCCTCTAGCCTTGCCCCTGCCGAGCC
ACTCCCTGGGGAAGCCCAGCAGCTCCCTGTATCTCCGCCACTGCCGAACC
ACTTCCTGGGGAAGCCCAGCAGCTCCCTGTATCTCCGCCACTGCCGA-CC
ACTCTGTGAGGGAGCCGGGAGG--CCCTCTATCCCTGCCAATGTCGAGCC
TCCGTTTGA--AAGCCACCCATCACCCCTCACCGCCGCCAATGCCAAACC
CCTCTCTGAG-AAGCCAAGCACCCCCCT-TATCCTTGCCAATGCCGACCC
CCTCTCTGAG-AAGCCAAGCACCCCCCT-TATCCTTGCCAGTGCCGACCC
ATTGTGTGGGGGGACCAGGCAGCCCCCACTACCCCAGCCAATGCACAGGC
ATTGTGTGTGGGGACCAGGCAGCCCCCACTACCCCAGCCAATGCACAGGC
ATTGTGTGTGGGGACCAGGCAGCCCCCACTACCCCAGCCAATGCACAGGC
ACTCTGTGAG-AAGCCAAGCAG-----GCGCTCCCTGCCGATGCAAA-CC
ACTCTGTGAG-AAGCCAAGCAG-----GCGCTCCCTGCCGATGCAAA-CC
ACTTCCTGGGGAAGCCCAGCAGCTCCCCCTATCTCCGCCACTGCCGGACC
GCTCTGTGGGGAAGCCCAGCAGCTCCCCCTATCTCCGCCACTGCCGAACC
GCTCTGTGAG-AAGCCGGGCAGCTTCCTCTCT------------------
CCTCTGGGTGGACGCCGAGCAGCTCCTTCCATGCTTTCAAACGCGGAGCC
ACTCCGTGTGGAAGCCAGGCAGCTCCC--TATCCCTTCCGATGCACAGCC
ACTCCGTGTGGAAGCCAGGCAGCTCCC--TATCCCTTCCGATGCACAGCC
ACTCCGTGTGGAAGCCAGGCAGCTCCC--TATCCCTTCCGATGCACAGCC
ACTCCGTGTGGAAGCCAGGCAGCTCCC--TATCCCTTCCGATGCACAGCC
ACTCTGTGAGGGAGCCAGGCAG--CCCTTTATCGCTGCCGATGCCGCACC
ACTCTGTGAGGGAGCCAGGCAG--CCCTTTATCGCTGCCGATGCCGCACC
TCTATGTG-GGAAGCTAAGCCGC-CGCTCTATCCCTGCCAATGCCGAACC
TCTATGTG-GGAAGCTAAGCCGC-CGCTCTATCCCTGCCAATGCCGAACC
----------------------------GCACCCTTGCCAATGCCG-GCC
ATCTTGCGAAAAAGCCAGGCAGCCCCCCCCAT----GCCAATGCGAAACC
ACTCTGCGGCAAAGCCAAGCCGCCCCCTC-ATCCTTGCCAGTGCCGAACC
ATTCTGCGGCAAAGCCGAGCCGCCCCCTC-ATCCTTGCCAGTGCCGAACC
TCTTTCTGAG-AGGCCGGGAGGCGCCC--TATGCCGGCCAACGCCGAACC
TCTTTCTGAG-AGGCCGGGAGGCGCCC--TATGCCGGCCAACGCCGAACC
TCTTTCTGAG-AGGCCGGGAGGCGCCC--TATGCCGGCCAATGCCGAACC
TCTTTCTGAG-AGGCCGGGAGGCGCCC--TATGCCGGCCAATGCCGAACC
ACTCCCTGTG-AAGCCGGGCAGTTCCCCCTCTAGCTGCCAGCGCATA-CT
ACTCCCTGTG-AAGCCGGGCAGTTCCCCCTCTAGCTGCCAGCGCATA-CT
ACTTTGTGAG-AAGCCAAGCAG--CCC-CTGTCCCTGTCAATGCCAAGCC
ACTCTGTTAGGAAGCCCAGCAGCTCCCTGTATCTCCGCCACTGCCGA-CC
ACTCTGCCGGAAAAACAGACAGCTCCATCAATCTCCGCCAACGCCGAACC
ACTCTGTAAGGAAGCCAAGCCGCTCGCCCTAGCCCTGCGAATGCCGAGCC
ACTCTGTGCGGGAGCCAAGCCGCTCGCCCTAGCCCTGCGAATGCCGAGCC
ACTCTGTGCGGGAGCCAAGCCGCTCGCCCTAGCCCTGCGAATGCCGAGCC
ACTCTGTGCGGGAGCCAAGCCGCTCGCCCTAGCCCTGCGAATGCCGAACC
ACTCTGCGCG-AAGCCAGTCAGTTCCCTCAATCTCTATAAATGACGAACC
GCTCTGTGAGGGGGGCAGGCAGCTCCCTCTCTCCCTCCCAATGCCGAACC
GCTCTGTGAGGGGGGCAGGCAGCTCCCTCTCTCCCTCCCAATGCCGAACC
ACTCTGTGTGGACGCCAAGCAGC-CCCCCTAGTCCTGCCAACGCCGAGCC
GCTCGGTGGGGAGGCCTGGCGGC-CCC-CTACACATGCCGGCGCCGAGCC
GCTCGGTGGGGAGGCCTGGCGGC-CCC-CTACACATGCCGGCGCCGAGCC
ATATAGTGGGGAAGCCCAGCAGCCCCCTCTATCCCTGCCAGTGCTGAACT
ACCGTGCGTAGAAGACCAGCAG-CCGCGCCACCCTTGCCAATGCCG-GCC
ACCCTGGGTGGAAGCGGGGCAGCCCGCTCTATCCCTGCCAATGCGGAGCC
ACTCCGTGGGGAAGCCGAGCAGCTCTCTCTAC--CTGCCAATGCTGAACC
ACTCGGCGGCAAAGCCAGGCAGCTCCCTCTATCCCTTCCAACGCCGAGTC
ACTCGGCGGCAAAGCCAGGCAGCTCCCTCTATCCCTTCCAACGCCGAGTC
TCTTAGAGCGTAGGCCATGCAG-------CAGCCCTCCAACCGCATACAC
TCTTAGAGCGTAGGCCATGCAG-------CAGCCCTCCAACCGCATACAC
TCTTAGAGCGTAGGCCATGCAG-------CAGCCCCCCAACCGCATACAC
ATATTGTGAAGAGGCCCGGCAG--CCCTCTATCCCTGCGAATGCCGAACC
ACTTTGTGGGGAA-------------------------------------
TCTCT--GAGGAACTCCACCAG----C-CTCTCCCCGCCAATGCCAAGT-
ACTCGGTGAGGAAGCCAAGCAGCTCCCTCTGTGCCTGCGAATGCCGAGCC
ACCCTGGGCGGAAGCGGGGCAGCCCCCTCTATCCCTGCCAATGCGGAGCC
ACCCTGGGTGGAAGCGGGGCAGCCCCCTCTATCCCTGCCAATGCGGAGCC
ACCCTGGGTGGAAGCGGGGCAGCCCCCTCTATCCCTGCCAATGCGGAGCC
ACCCTGGGCGGAAGCGGGGCAGCCCCCTCTATCCCTGCCAATGCGGAGCC
ACCCTGGGTGGAAGCGGGGCAGCCCCCTCTATCCCTGCCAATGCGGAGCC
ACCCTGGGTGGAAGCGGGGCAGCCCCCTCTATCCCTGCCAATGCGGAGCC
TACCTGTGAGGAAGCCAGGCAGATCCCCCTATCCCTGCCAATGCCGAGCT
ACTCTCTCGGGAAGCCCTGTAGCACACTCTATCCCTGTCAACGCCAAACC
ACCCTGTTAAGAAGCCAAGCAGCTCCCTC---TCCTGTCAATGCCGAGCC
GCCCTGTGAG-GATCCAGGCAG--CCC-CTATCCCTGCCAATGCCGCACC
GCCCTGTGAG-AAGCCAGGCAG--CCC-CTATCCCCGCCAATGCCGCACC
ACATTGGAAGAATGCCAAGCAGCTCCATCCATCCCCGTCACGGCCGAACC
GCGCGCTGAGGACGCCAAGCAG-----CCTATCTCTGTCAATGCTGAGCC
ACTCGGTGAGGAAGCCAAGCAGCTCCCTCTGTGCCTGCGAATGCCGAGCC
ACTCGGTGAGGAGGCCAAGCAGCTCCCTCTGTGCCTGCGAATGCCGAGCC
ACTCGGTGAGGAGGCCAAGCAGCTCCCTCTGTGCCTGCGAATGCCGAGCC
ACTCGGTGAGGAAGCCAAGCAGCTCCCTCTGTGCCTGCGAATGCCGAGCC
------TGA--AGAACAAGGAGATCCCTCTATCCCTGCCAATGCCGAGCC
TATCTGTGAGGAAGCCAGGCAGATCCCTCTATCCCTGCCAATGCCGAGCC
TACCTGTGAGGAAGCCAGGCAGATCCCTCTATCCCTGCCAATGCCGAGCC
TATCTGTGAGGAAGCCAGGCAGATCCCTCTATCCCTGCCAATGCCGAGCC
TCTCTGTGAGGAAGCCAGGCAGATCCCTCTATCCCTGCCAATGCCGAGCC
ACCTTGTGAGGAAGCCGGTCCGCTGCC---GTCCCTGAAAATGCCGAACC
GCTCTGTGAA-AAGCCAGGCCGCTCC-TCTATCCCTGCCAATGCCGAGCC
-----AGGAG-AAGCCAGGCCGCTCC-TCTATCCCTGCCAATGCCGAGCC
GCCCTGTGAG-AAGCCAGGCAG--CCC-CTATCCCCGCCAATGCCGCACC
GACCTGTGAG-AAGCCAGGCAG--CCC-CTATCCCCGCCAATGCCGCACC
GCCCTGTGAG-AAGCCAGGCAG--CCC-CTATCCCCGCCAATGCCGCACC
GCCCTGTGAG-AAGCCAGGCAG--CCC-CTATCCCCGCCAATGCCGCACC
GCCCTGTGAG-AAGCCAGGCAG--CCC-CTATCCCCGCCAATGCCGCACC
GCCCTGTCAGGGATCCAGGCAG--CCC-CTATCCCTGCCAATGCCGCACC
ACTCTGTGGGGAAGCCATGCAGCCCCCACTATCCCTGCCAATGCCGAGCA
ACTCTGTGGGGAAGCCATGCAGCCCCCACTATCCCTGCCAATGCCGAGCA
ACTTTGTGGGGAAGCCATGCAGCCCCCACTATCCCTGCCAATGCCGAGCA
ACTCTGTGAGGAAGTCAGGCAGCAGCC-CTATCCGTGCTCATACCCA-CC
GCACCGTGCGGAGGCCCAGCAG--CCCTATATCCCAGCCCATGCTGAGCC
GCACCGTGCGGAGGCCCAGCAG--CCCTATATCCCAGCCCATGCTGAGCC
ACTCTGTGGGGAATTCAGGCAACTCCCTCTACCCCTGCCTATGCCGAGCT
ACTCTGTGGGGGGGA-ATTCAGCTCCCTCTACCCCTGCCTATGCCGAGCT
GCCCTGTGAG-AAGCCAGGCAG--CCC-CTATCCCCGCCAATGCCGCACC
CCTCTGTTAGGAAGCCAAGCAGCCCCCACTGCGCCTGCTAATGCGGA-CC
ACTG----------------------------GCCTGCTAATGCGGA-CC
GCTCTATGGGGAAACCGGGCAG--CCTTCTATCCCTCCCAACGCCGGGCC
-----GTG-GGTAGTCAGCCAG--CCCCCTACCCCTGCCAATTCAGAACC
-----GTG-GGGCGGCAAGCAGGGCGTGCTGTCAGGGTCAGTGCCGAAC-
ACTCTGTGACGAAGCCAAGCAGCCCCCTCCATCCTTGCCAATGCCGA-CC
ACTCCCCGGCAGGGCCAAGCAGCTGCCTCTATCCCTGCCAATGCCGAGCC
ACCCCGCGCTG-AGCCACTCAG----------------------------
TCTCTGTG-GGAAGCTAGGCAGCTCC---TGT-TCCGCCAATGCAG-GCC
TCTGTGTG-GGAAGCTAGGCAGCTCC---TGT-TCCGCCAATGCAG-GCC
TCTCTGTG-GGAAGCTAGGCAGCTCC---TGT-TCCGCCAATGCAG-GCC
TCTCTGTG-GGAAGCTAGGCAGCTCC---TGT-TCCGCCAATGCAG-GCC
------TGAGGAACCCGAGCAGCGCCCCCTATTCCTGCATATACCGTGCC
AACGTGTGA--AGGCCGAGCGG--------------GCGGATGCAGAGGC
ACTCTGTGTGGAAGCCGAGCAGCTCCGTCTGTGCTTGCCAATGCCGAGCC
ACTCTGTGTGGAAGCCGAGCAGCTCCGTCTGTGCTTGCCAATGCCGAGCC
ACTCTGTGTGGAAGCCGAGCAGCTCCGTCTGTGCTTGCCAATGCCGAGCC
ACGCTGTGTGGAAGCCGAGCAGCTCTGTCTGTGCTTGCCAATGCCGAGCC
ACTCTGTGTGGAAGCCGAGCAGCTCCGTCTGTGCTTGCCAATGCCGAGCC
ACTCTGTGTGGAAGCCGAGCAGCTCCGTCTGTGCTTGCCAATGCCGAGCC
ACATA---------------------------------------------
ACGC-GGGAG-AGGTCAGAGCG----------------------------
GCTC------------------C-CCC-CTATCCCTGCCAATGCCGAGC-
ACACTGGGGGGACGCCAAGCAGCTCCGCCTCTCCGCGCCAATGCCGAACC
ACTCTGTG-GTAAGCCCAGCAGCTCCTTCTATCCCTGACAATGCCAA-CC
TCTGCGCGTGGAAGCCAAGCAGCTCCTTCTATCCCTGGCAATGCCAA-CC
ACCAGGTGAG-AAGCCGAGCGGCTCCCTCTATCCCTGCCGATGCCGAACC
GCTCTGTGAG-AAGCCGAGCGGCTCCCTCTATCCCTGCCGATGCCGAACC
GCTCTGTGAG-AAGCCGAGCGGCTCCCTCTATCCCTGCCGATGCCGAACC
ACTCTGTGAGGGAGCCGATCAGCTCCCTCTATCGCTGCCAATGCCGAGCC
ACTCTGTGAGGGAGCCGATCAGCTCCCTCTATCGCTGCCAATGCCGAGCC
ACTCTGTGAGGGAGCCGATCAGCTCCCTCTATCGCTGCCAATGCCGAGCC
ACTCTGTG-GGAATCCTGGCAGCTCCCTCCGTCTCCGCTAATGCCGAACT
ACTCTGTG-GGAATCCTGGCAGCTCCCTCCGTCTCCGCTAATGCCGAACT
TCCCC-----------------CTCC-GCTGTCCCTGCCAATGCCGATCC
ACTCAGTGAGAACGCTAAGCAG--CCCTCTATCTCCGCCAATGTCAAGC-
ACTCTGTGTGGGAGCCGGGCAGCTACCGC-ATCTCTGCCAATGCCGAACC
GCTCTGTGTGGGAGCTGAGCAACCCCCTCCAGCCCTGCAAATGCAGCGCC
AATCTGTG-GGAAGCTAGGCAGCTCC---TGT-TCCGCCAATGCAG-GCC
ACTCGGTG-GGGAGCCGAGCAGCTTC---TATCCCTCCTAATGCCAAGCC
ACTCTGTGTGGAAGCCGAGCAGCTGCCTCTGTGCTTGCCAATACCGAGCC
AC---GTGGGGGGTCCGAGCGA----------------------------
CCTCTGTGTAGAAGCCAAGCAGCCCCCCCACTGCCTGCTAATGCGGA-CC
ACTCCGTGTGGAAGCCAAGCCT---CCGCTAACCCTGCTAATGCCCAGCC
ACTCCGTGTGGAAGCCAAGCCT---CCGCTAACCCTGCTAATGCCCAGCC
ACTCCGTGTGGAAGCCAAGCCT---CCGCTAACCCTGCTAATGCCCAGCC
GCTC------------------C-CCC-CTATCCCTGCCAATGCCGAGC-
ACTCTGTG-GTAAGCCCAGCAGCTCCTTCTATCCCTGACAATGCCAA-CC
GCTCTGTGAG-AAGCCGAGCGGCTCCCTCTATCCCTGCCGATGCCGAACC
ACCCAGTGACCAA-CCGAG-AGCACC-TCTATCCCTGTCAGTGCCGAACT
ACACAGTGTGGGAGCGAAGCAGCACCCTCTGTCTCTGCTAATGCCAAGC-
ACACAGTGTGGGAGCGAAGCAGCACCCTCTGTCTCTGCTAATGCCAAGC-
ACACAGTGTGGGAGCGAAGCAGCACCCTCTGTCTCTGCTAATGCCAAGC-
ACACAGTGTGGGAGCGAAGCAGCACCCTCTGTCTCTGCTAATGCCAAGC-
ACACAGTGTGGGAGCGAAGCAGCACCCTCTGTCTCTGCTAATGCCAAGC-
GCTGTGTGTGGGAGCCAAGCGGCGCCCACCATCTCTGCCAATGCCGAACC
ACTCTGTGAGGAGGGCAAG-AGCAGCCGCGATCCCTGCCAACGCTGAGCC
ACTCTGTGAGGAGGGCAAG-AGCAGCCGCGATCCCTGCCAACGCTGAGCC
GCTCTGTGTGGGAGCTGAGCAACCCCCTCCAGCCCTGCAAATGCAGCGCC
GCTCTGTGTGGGAGCTGAGCAGCCCCCTCCAGCCCTGCAAATGCAGCGCC
----------------------CACCC--TAT-CGTCAC-ATGAGGAGCC
ACTCTGTGTGGACGCCAAGCAGCACCCTCTATCCCTGCCAATGCTGCACC
CCCCTCTGAGGAAGCCAAGC-GCTCCCCCTATCCCTGCCAATGCCAAGC-
TGCGTGT-------------------------------------------
ACTCTGCGGGGAAGCCAAGCAGCTCCCTCTATCCCTGCCAATGCTGAGCC
ACTCTGCGGGGAAGCCAAGCAGCTCCCTCTATCCCTGCCAATGCTGAGCC
ACTCTGCGGGGAAGCCAAGCAGCTCCCTCTATCCCTGCCAATGCTGAGCC
GCCCTGTGTAGAAA--AACCAGCATCTTCTTTCTTTCTCAGCACCGAACC
ATACTGTTTGAAAGCCAAGCAG----------------------------
----------------------CCCCCTCTATGCCTGCCGATGCTGAACC
ACTTGGTGGGGGACAAGGGGGGCTAACTCTATCGGGGCTAATGCCAAGC-
GCTCTGGGAGGAAGCCAAGCAGCCCCCTCTATCCCTGCCAATGCAGAGCT
ACGTGGTGGGGGAGCTCAGCGG--CCCT-TCTCCCTTCCAATGCGATACT
ACTCCGTGAG-ACGCCAAGCGGCACCCTCTATTCCTCCCAATGCCGAAAC
TCTCTGTGGGGAAGCCATGCAGCTCCCCCTATCCCTGCCGACGCCGAACC
ACTCTGTGAG-AAGCCAAGCGGC-CCCTCTATCCCTGTAGATGCCAAGC-
ACTCTGTGTGGAGGCCAAGCAGCACCCCCTATCCCTGCCGATGCCGAACC
ACTCTGTGTGGAGGCCAAGCAGCACCCCCTATCCCTGCCAATGCCGAACC
ACTCTGTGTGGAGGCCAAGCAGCACCCCCTATCCCTGCCAATGCCGAACC
ACTCTGTGTGGAGGCCAAGCAGCACCCCCTATCCCTGCCAATGCCGAACC
ACTCTGTGTGGAGGCCAAGCAGCACCCCCTATCCCTGCCAATGCCGAACC
ACTGAGTGAGGAGGCCTGGTAGCCCCCTCTATCCCTGCCAATGGTGATCC
ACACGGTGTGGGATCCCAGCAGCCCCCTCTGTCCCTGCCACTGCCGAACC
AGCCTGTG-GGTAGCCGAGCAGCACCC--TATCCCTGTCCGTCCCGAACC
GCTCTGGGAGGAAGCCAAGCAGCCCCCTCTATCCTTGCCAATGC-GAGCT
ACTCTGTGAGGAAGGCAGGGAGC-CCCTCTACCCCTGTCCGTGCGCAGCC
TCTCTGGGAGGAAGCCAGGGAGC-CCCTCTACCCCTGTCCGTGCGCAGCC
ACTCGGTGTGGGAGCCAGACAGC-CCC-CTACTGCTGCCAATGCGGGGCC
ACTCGGTGTGGGAGCCAGACAGC-CCC-CTACTGCTGCCAATGCAGAGCC
ACTCGGTGTGGGAGCCAGACAGC-CCC-CTACTGCTGCCAATGCGGAGCC
ACTCTGTG-GCACGGCAAGCGGCTCCCCCTATCCCTGCCAATGCCAAGC-
ACTCTGTG-GGACGGCAAGCGGCTCCCCCTATCCCTGCCAATGCCAAGC-
ACTCTGTGTGGAGGCCAAGCAGCCCCCCCTATCCCTGCCAATGCTGAACA
ACTCTGTGTGGAGGCCAAGCAGCCCCCCCTATCCCTGCCAATGCTGAACA
ACTCTGTGTGGAGGCCAAGCAGCCCCCCCTATCCCTGCCAATGCTGAACA
ACTCTGTGTGGAGGCCAAGCAGCACCCCCTATCCCTGCCAATGCCGAACC
TCTTTGTGGGGACGCCAAGCACCACCCTCAATCCGTGGCAACGCCGAACC
TCTTTGTGGGGACGCCAAGCACCACCCTCAATCCGTGGCAACGCCGAACC
ACTCTGTGTGGGCGTTAGGCAGCTCC---TCTCCTTGCCACTGAACCGCC
ACTCTGTAAGGAAGCCGAGAAGCCCCCTCTCTCCCTGCCCATGCCAAACT
ACGCTGTGAA-AAGCCGAGCAGCCCTCTCTGTCTTTGCCAATCCAAA-CG
TCTCTGTCCGGAAGCCGGGCAGCCCCCTCTATGCCTGCCGATGCTGAACC
ACACCGTGAGGAAGCCAAGCAGCTCCCGCTATCTCTCCCGATGCCGAACC
ACACCGTGAGGAAGCCAAGCAGCTCCCGCTATCTCTCCCGATGCCGAACC
ACACCGTGAGGAAGCCAAGCAGCTCCCGCTATCTCTCCCGATGCCGAACC
ACTCTGTGAGGAAGCCAAGCAGCTCCCCCTATCCCTGCCAACGCCAAGCC
ACTCC--GGGGTAGCCAAGCAGCTCCCCCTATCCCTGCCAACGCCAAGCC
CCTCC--GGGGTAGCCAAGCAGCTCCCCCTATCCCTGCCAACGCCAAGCC
ACTCTGTG-GG-TGCCAACCCCCTCCCACTATCCCTGTCCATGCCGAGGC
ACTCTGTG-GG-TGCCAACCCCCTCCCACTATCCCTGTCCATGCCGAGGC
ACTCTGTG-GG-TGCCAACCCCCTCCCACTATCCCTGTCCATGCCGAGGC
ACTCTGTG-GG-TGCCAACCCCCTCCCACTATCCCTGTCCATGCCGAGGC
ACTCTCTGAA-AAGTCAGGAAA---CCTCTACTCTTGATAATACAAAATC
ACT--TTGCTAAACCCAAGTAGCTGT-ACTATCCTTGACAATGCCGAACC
AGCCTGTG-GGTAGCCGAGCAGCACCC--TATCCCTGTCCGTCCCGAACC
GCTCTAGGAGGAAGCCAAACAGCCCCCTCTATCCCTGCCAATGCAGCGCT
GCTCTGGGAGGAAGCCAAACAGCCCCCTCTATCCCTGCCAATGCAGAGCT
GCTCTGTGGGGAAGCCAAACAGCCCCCTCTATCCCTGCCAATGCAGAGCT
GCTCTGGGAAGAAGCCAAGCAGCCCCCTCTATCCCTGCCAATGCAGAGCT
----------------------CCCCCTCTATCCCTGCCAATGCAGAGCT
ACTGTGTGAGGAGGTCAAGTGGCTCACCCTGTCCCTGCCAATGCCGCACC
ACTATGTGAGGAGGTCAAGTGGCGCACCCTGTCCCTGCCAATGCCGCACC
ACTGTGTGAGGAGGTCAAGTGGCTCACCCTGTCCCTGCCAATGCCGCACC
ACA--TTGAGGAGGTCAAGTGGCTCACCCTGTCCCTGCCAATGCCGCACC
ACACAGTGCGGCATCCCAGCAGC-CCCT-TAACCCCGCCAATGCCGAGCC
ACAGTGTGCGGACGCCAAGCAC----------------------------
ACAGTGTGCGGACGCCAAGCAT----------------------------
ACAGTGTGTGGACGCCAAGCAT----------------------------
ACAGTGTGCGGACGCCAAGCAT----------------------------
ACAGTGTGCGGACGCCAAGCAT----------------------------
ACTCCGTG-GGAAGTCAAACACCCCCCTCTATCCCTCCCAATGCCGAGCC
ACTCCGTG-GGAAGTCAAGCACCCCCCTCTATCCCTCCCAATGCCGAGCC
ACTCTGTGAGCAGACCAAGCAGCACCCTCTATCCCTGCCAATGCGGAACC
TCTTCGCGAGGGAGCCAAGCAGCCCCCCCTATCCCTGCCAGTGCCGAGCT
TTCCTGTGAGGAAGCCAAGCAGCACCCTTTACCTCTGCCAATGCCGAGCC
TCTCTGTGAGGGAGCCACGCAGCTCCCTCTATCTCTGCCAATGCCGAGCC
TCT--GCG-GGCAGCCCCGCAGGTCCCTCTATCCCTGCGAATGCACAGCC
TCT--GCG-GGCAGCCCCGCAGGTCCCTCTACCCCTGCGAATGCACAGCC
TCT--GCG-GGCAGCCCCGCAGGTCCCTCTACCCCTGCGAATGCACAGCC
ACCCTGTGAGGAAGCCAAGCAGCACCCTAGATCTTCGCCAATGCCGAACC
TCTCTGTGAGGGAGCCACGCAGCTCCCTCTATCTCTGCCAATGCCGAGCC
ACTCTGTGTGGAAG--AGGCTGCAACCCCTCTCTCTCCCAATGTCGAACC
AATCG-TGTA-AGGCCCGGCAG-TGCC--TATCCCTCCATGTGCGGAACC
AATCG-TGTA-AGGCCCGGCAG-TGCC--TATCCCTCCATGTGCGGAACC
ACTCGGTGAGGAAGCCAGGCACCTCCCCCTG-CCCTGCCAATGCAGAGCC
ACTCGGTGAGGAAGCCAGGCACCTCCCCCTG-CCCTGCCAATGCAGAGCC
ACTCTGTGAGGAGGCCAGGCAGCTCCCTCTATCCCTGCCGATGCCGAGCC
ATTCTGTGTGGAAGCCAAGCAGCTTGCCCTATCCCTGCCAGTGCTGAACC
ATTCTGTGTGGAAGCCAAGCAGCTTGCCCTATCCCTGCCAGTGCTGAACC
ATTCTGTGTGGAAGCCAAGCAGCTTGCCCTATCCCTGCCAGTGCTGAACC
ATTCTGTGTGGAAGCCAAGCAGCTTGCCCTATCCCTGCCAATGCTGAACC
ATTCTGTGTGGAAGCCAAGCAGCTTGCCCTATCCCTGCCAGTGCTGAACC
ATTCTGTGTGGAAGCCAAGCAGCTTGCCCTATCCCTGCCAGTGCTGAACC
ACTCCGTG-GGAAGTCAAGCACCCCCCTCTATCCCTCCCAATGTCGCGCC
GCCCTGGGACGAAGACAGGTAGC-CCC-CTAACCCTGCCCCTGCCGAACC
ACTGTGTGGGGAGGCCATGCAGCGCCCTCTATCCCTGGCAATGCGGAACC
ACTCTGTGAGGAAGCCAAGCAGCTCCTTCTATCCCTACTACTGCAGATCC
AC----TGTG-TGTCTGGGCAGC-CCC-CGATCCGTCCAAATGCCGAAAT
ACTCTGTGAGCAGGTCAAGCAGATCCCCCTATCCCTGCCAATGCGAAAAC
ACTCTGTGAGCAGGTCAAGCAGATCCCCCTATCCCTGCCAATGCGAAAAC
TCTGCCCGGGGAAGCTAAACAGCGTCTTCTATCGCAGCCAACGCTGACCC
ACG--CAG-GGAGTCCGAGCGA----------------------------
TTTTC-----------------CTCCCTCTATCCCGGCCAATGCCGATCC
ACACAGTGAGGAAGCCAAGCAGCTGCCTATATCCCTGCCAATGCCAAACC
ACAAGGTGAGGAGGCCAAGCAG-TCCCGCCATCCCTGCTAACGCCGAACC
ACTGCGTGAGGAAGCCAAGCAGCGCCTTATATCTCTGCCAATGCCGAACC
ACTCTGTGGCGGAGCTAAGCAGCAGC-ACTGTCAATGTCAAGGCGGAGTC
GTTCCGTGAT-AAGCGAAGGAGCTCC---TATCGCTGAGAATCCGAAACC
GCTCTGTGAA--ATCACAGCGGCCCCCTCTATCCCTGCCAATGCCGAACC
-----GTG-GCTCGCCACACAGCTCCCTCTATCTTTGCCAATGCTGAACC
-----GCG-GGCAGCCCCGCAGGTCCCTCTACCCCTGCGAATGCACAGCC
-----GCG-GGCAGCCCCGCAGGTCCCTCTACCCCTGCGAATGCACAGCC
ACACTGTGAAGAGGCCAAGCAGTTCCCACTATCCCTCCATATGCCGCACC
AATGTGTGGGGACGCCAGACAGC-CCCTTGATCCCGGCCAACGCCGAACT
ACTCTGTGGGGAGGCCAAGCAGATCCCCCTATCCCTGCCTATGTGGAACC
ACTCTGTGGGGAGGCCAAGCAGATCCCCCTATCCCTGCCTATGTGGAACC
ACTCTGTGAG-AAGCCAGGCAGC-CCCTCCGTCCTTGACAATGCCAAACC
ACTCTGTGAAGAAGTCAAGCGGCTCCCC-GATCCCTGCGAGTGCCGAGCC
ACTCTGTGAAGAAGTCAAGCGGCTCCTTTGATCCCTGCGAGTGCCGAGCC
ACTCTGTGAAGAAGTCAAGCGGCTCCTTTGATCCCTGCGAGTGCCGAGCC
TCTTTGTGAAGATGCCATGCAGCTCCCTCGATCCCTCCCAATGTCGA-CC
TCTTTGTGAAGATGCCATGCAGCTCCCTCGATCCCTCCCAATGTCGA-CC
AATGTGTGAGAAGGCTAGGCAGC-CCCACTATCTCTGCCAATGCCCAATC
------------------------CCC-CCATCCCTGCTAATGCCGAGCC
ACTCGGTGGGGAAGCCGAGCAGC-CCCTCTGTCCTTGCCAATGCCGAGCC
----------------------C-CCCTCTATCCCTGCCAATGCCGAGCC
----------------------C-CCCTCTATCCCTGCCAATGCCGAGCC
ATCCTGTGACGGAG------------CTCTATCGCTACTTTCG-------
ACTCTGTGAGGAAGCCCAGCAGCTCCC-CAAA-CCTTCCAATGCTAAACC

--------------------------------------GGGAGGTGAGTG
--------------------------------------------------
AGCTCTGGCGGTCACAGGGCCGAGCGCCAGCGACGT-GGGGAAG------
ACCTCTGGCGGTGACAGGGTCAAGCACCCACGACCCAAGGGAGGCCAGCG
--------------------------------------------------
GCATCTAGTGGTGACAGGGTCCAGTGCCTACCACATAG-GAAAGTCAGAG
ACGTCTGATGGCGACAA---------------------------------
ACTTCTTGTGGTGGCAGGTTCAAGCACCTACGGCGTAGGGGTGGACAGAA
GCTTCTGGCGGTGACAAGGCCAAGCACTTATGACGTAGGGGAAGTCGGGG
ACTTCTCACACTGAC--------------------------AGGTGAGGG
GCTTCTGGCCGTAACAGGGTC-AGCGCCTACCCCCG-C---AGGTCGGAG
CCTTCTCGTGGTGAGAGGGCC-AGCGCCTACGACGTTG---GGGTCGGAG
GCCTCTCGTCATGACGGGGGCCGGCGCCTGCGACGT-GGCGAGG------
AGTTCTGGTGGTGTCAGGGTCGGGCGCCTACGATGC-GGGCATGCCAGAG
--------------------------CCTACAGCGTAGGTGCGGTGAGCG
ACTTCTGTTGGTGGGAGTGTCGAGCACCTGCGACTTAGTGTGGGTCAGTG
ACTTCTGGTGGTGGCACGCTCAAACGCCCATGATGT-GGGGGGGTCAGAG
ACTTCTGGTGCTGACAGGGTGG-GC-CCTACGACGTAGGCAAGGTCAGCG
ACTTCTGGTGCTGACAGGGTGG-GC-CCTACGACGTAGGCAAGGTCAGCG
ACTTCTGGTGCTGACAGGGTGG-GC-CCTACGACGTAGGCGAGGTCAGCG
ACTTCTGGTGCTGACAGGGTGG-GC-CCTACGACGTAGGCAAGGTCAGCG
ACCTGTGGTGGTGACCGGGTCGAGCATCTGTGACGACG--GGGGCCAGAG
ACCTGTGGTGGTGACCGGGTCGAGCATCTGTGACGACG--GGGGCCAGAG
ACCTGTGGTGGTGACCGGGTCGAGCATCTGTGACGACG--GGGGCCAGAG
ACCTGTGGTGGTGACCGGGTCGAGCATCTGTGACGACG--GGGGCCAGAG
GCCTCTCGTCATGACGGGGGCCGGCGCCTGCGACGT-GGCGAGGCCAACG
GCTTCTCGTCGTGACAGGGTCCTGCGCGCACGAGAT-GGGCGGGTCAGGG
GCTTCTCGTCGTGACAGGGTCCTGCGCGCACGAGAT-GGGCGGGTCAGGG
ACTTCTGGCGGTGACAGGGT-GAGTGCCGACGACGT-GGGGAGGCCCGAG
ACTTCTGGCGGTGACAGGGT-GAGTGCCGACGACGT-GGGGAGGCCCGAG
ACTGCTGGTGGTGACGGAGTC-ACCAACGACGGCGTAGGGGAGGTCAGAG
GCTTCTGACGGCTACAGAG--GAG--------------------------
ACTTCTGCTGGTGGCCAGGCGGAGTGTCTACGACATAG---AGGTCAGAA
GCCTGTGCCGGTGGCCTGG-GGAGTGCCTACAACAT-G-GGAAACCACAG
ACCTCTGGTGGTGAGAGGG-CGACCCTCTACCGCCTAG-ACAGGCCAGAG
ACCTCTGGTGGTGAGAGGG-CGACCCTCTACCGCCTAG-ACAGGCCAGAG
ACCCCTGGCCGCGACAGGGTC-AGTCCC--GGATG--G------------
ACTTCGCGTGGTGGCAGGGTC-AGTGCCTAGGACGT-GGGGAGGTCAGAG
ACTTCGCGTGGTGGCAGGGTC-AGTGCCTAGGACGT-GGGGAGGTCAGAG
ACTTCGCGTGGTGGCAGGGTC-AGTGCCTAGGACGT-GGGGAGGTCAGAG
ACTTCGCGTGGTGGCAGGGTC-AGTGCCTAGGACGT-GGGGAGGTCAGAG
TTCTCTAGTGTTGGCAGGGTC-AT--------------------------
ACCTCTGGTGGTGACAGGGTCAAGTGCCTACGACGT-GGGGAGGTCACAG
ACCTCTGGTGGTGACAGGGTCAAGTGCCTACAACGT-GGGGAGGTCACAG
--------------------------------------------------
GCCTCTGGTGGTGACGGGGCCCAGGCGTTAACAC-T-GAAAACGACTGAG
GCCTCTGGTGGTGACGGGGGCCAGGCGTTAACAC-T-GAAAACGACTGAG
GCCTCTGGTGGTGCCGGGGCCCAGGCCTT---------------------
--------------------------------------------------
--------------------------------------------------
ACTTCTGATGGCGGCAGGGTCAACTGCCTACGGCGTAG-CGAAATCAGAG
ACTTCTGATGGCGGCAGGGTCAACTGCCTACGGCGTAG-CGAAATCAGAG
ACTTCTGATGGCGGCAGGGTCAACTGCCTACGGCGTAG-CGAAATCAGAG
--------------------------------------------------
GCGTCTGGTGGTGACATGGCCAAATACCTGCGACGTTGGGGAGGTCAGTG
CCTGCTGGCCGGGGCAAAGCCAAGTACGTTCTACGTAG--GAGGGCAGCG
GCCTCTGGTGGTGACGGGGGCCAGGCGTTAACAC-T-GAAAACGACTGAG
ACCTGTGGTGGTGACAGGGTCAAGCGCCTACAACGGAG-GGTGCTCAGAG
ACCTGTGGTGGTGACAGGGTCAAGCGCCTACAACGGAG-GGTGCTCAGAG
ACCTCTGGTGGTGACAGGGTCAAGTGTCTGTGACGTAGCGGAGGTCCGCG
ACTTCTGGCGGTGACGAGGTCGAGCGCCCATAACGT-GGGGAGGTCAGAG
------------------------------------------------AG
-------------CCA-GGTACTT-AC-GACGATGC-GCGTAGGGCAGAG
------------------------------------------------AG
GCCTCTGGTGTTGACAGGGTGCAGCACCCGCGACGC-GGCGAAGCCGGGG
GCCTCTGGTGTTGACAGGGTGCAGCACCCGCGACGC-GGCGAAGCCGGGG
ACCTCTGGTGGTGACAGGGTCAAGTGTCTGTGACGTAGCGGAGGTCCGCG
ACCTCTGGTGGTGACAGGGTCAAGTGTCTGTGACGTAGCGGAGGTCCGCG
ACCTCTGGTGGTGACAGGGTCAAGTGTCTGTGACGTAGCGGAGGTCCGCG
--------------------------------------------------
CTTTCTGGTGGTGTCAGGGTCACGCACTTACGACGT-GGGAAGATGAGAG
--------------------------------------GGTAAGTCAGAG
ACTTCTGGTGGTGACAGCATCAGGCACCTAGGGCGT-GGTGATGTCAGAG
GCTTCTGGTGGTGCGCGTGTCCAGCGCCGACGACGT-GGGCGGGCGAGAG
GGTTCTTGTGACGACATTTCCCGGCGTTTACCA--TAGGGGGGGTCAGTG
CCTTCTGGTTGTTCCAGTGTCAAGTACCGGCGATTTCG-GTACGTCATGG
GCTGTGTGCGGTAGCAGGGCCAGGCACCGACGACGCAGGGGAGGCCAGAG
GCTGTGTGCGGTAGCAGGGCCAGGCACCGACGACGCAGGGGAGGCCAGAG
--------------------------------------------------
GCTGTGTGCGGTAGCAGGGCCAGGCACCGACGACGCAGGGGAGGCTAGAG
--------------------------------------------------
GCTGTGTGCGGTAGCAGGGCCAGGCACCGACGACGCAGGGGAGGCCAGAG
GCTTCTGGTGGTGCGCGTGTCCAGCGCCGACGACGT-GGGCGGGCGAGAG
GCCTGCGGCGCGGACATGGCCCAGCGCCGACGACGT-GGGGAGG-GAGGT
GCTTCTGGTGGTGCGCGTGTCCAGCGCCGACGACGT-GGGCGGGCGAGAG
GCTTCTGGTGGTGCGCGTGTCCAGCGCCTACGACGT-GGGCGGGCGAGAG
GCCTGCGGCGCGGACATGGCCCAGCGCCGACGACGT-GGGGAGG-GAGGT
ACTTCTGGTGGTGCGCGTGTCCAGCGCCGACGACGT-GGGCGGGCGAGAG
GCTTCTGGTGGTGCGCGTGTCCAGCGCCGACGACGT-GGGCGGGCGAGAG
ACCTCTGGTGGCGACAGGGCCAAGCACCTACAACGT-GGGAAGGTCAGAG
ACTTCTGGTGGTGCGCGTGTCCAGCGGCTACGACGTTG--CGGGCGAGAG
GCTTCTGGTGGTGACAGGGCCAAGCGCCTGCGACCTAG-CAAGCTCTGAG
GCTTCTGGTGGTGACAGGGCCAAGCGCCTGCGACCTAG-CAAGCTCTGAG
ACCTCTGGTGGTGACGGGGCCAAGCGCCTGCGACGTAG-GGAAGCCAGAG
GCTTGTGGCGGTGACAGGGCCACGCACCTACGGCGT-GCGGAGGTGAGCG
GCTTGTGGCGGTGACAGGGCCACGCACCTACGGCGT-GGGGAGGTGAGCG
GCTTGTGGTGGTGACAGGGCCACACACCTACGGCGT-GGGGAGGTGAGCG
GCTTGTGGTGGTGACAGGGCCACACACCTACGGCGT-GGGGAGTTGAGCG
TCTGCTGGCAGTGACAGGGCCAAGCACCTGCGACGT-GGTGAGGTCAGAG
TCTGCTGGCAGTGGCAGGGCCAAGCACCTGCGACGT-GGTGAGGTCAGAG
TCTGCTGGCAGTGACAGGGCCAAGCACCTGCGACGT-GGTGAGGTCAGAG
TCTGCTGGCAGTGACAGGGCCAAGCACCTGCGACGT-GGTGAGGTCAGAG
GCTTGTGGTGGTGACAGGGCCACGCACCTACGGCGT-GGGGAGGTGAGCG
GCTTGTGGTGGTGACAGGGCCACGCACCTACGGCGT-GCGGAGGTGAGCG
ACCTCTGGTGGTGACA----------------------------------
GCTTCACGTGGTGACAGGGGTA----------------------------
GCTTCACGTGGTGACAGGGGTA----------------------------
TCCTCTGGTGGTGGCACGGTTAGGTGCCCACGACGT--------------
TCCTCTGGTGGTGGCACGGTTAGGTGCCCACGACGT--------------
GCGTCTACCGCTGCTTCGCATGA-CGCGCAAGA-GT--------------
ACTTCTGGT-TTAACCGGGTCAAGCACCTAAGGCGC--AAGAGGTCAGAG
ACCTGTGGCGGCGACAGGGTCCGGC--------CGT-G------------
ACCTGTGGCGGCGACAGGGTCCGGC--------CGC-G------------
ACCTGTGGCGGCGACAGGGTCCGGC--------CGC-G------------
ACCTGTGGCGGCGACAGGGTCCGGC--------CGC-G------------
ACCTCTGGTGGTG-------------------------------------
ACCTCTGGTGGTG-------------------------------------
ACCTCTGGCGGTG-------------------------------------
ACCTCTGGTGGTGACAGGGTCAAGCGCCTGCGACGC--------------
ACCCCTGGTGGTCACAGGTT------------------------------
TCCTCTGGTGGTGGCACGGTTAGGTGCCCACGACGT--------------
ACCTGCGGTGGCGACAGAGTCAAGCGCCTAAGATGCAGGGGAGGTGAGCG
ACTTCTGGTGGTGAAAGTTTCAAGCACCTACGTCAT-GGGTACGTTAGAG
--------------------------------------------------
--------------------------------------------------
GCTTCTGCTGGCGACGTGGTCACGTGCCTCCGACGC-GGGGAGGGCAAAG
GCTTCTGCTGGCGACGTGGTCACGTGCCTCCGACGT-GGGGAGGTCAAAG
ACTCTTG-TGGT--------------------------------------
--------------------------------------------------
GCTTCTGCTGGCGACGTGGTCACGTGCCTCCGACGT-GGGGGGGGCAAAG
GCTTCTGCTGGCGACGTGGTCACGTGCCTCCGACGT-GGGGAGGTCAAAG
GCTTCTGCTGGCGACGTGGTCACGTGCCTCCGACGT-GGGGAGGTCAAAG
GCTTCTCGAGGTGCAAAAGTTTATTGCCCAAGACCTAG--CAGGTCAGAA
ACCTCTGGTTGTGCCAGTGACAATCACCCATGCGGTCG-GGATGTCAGAG
ACTTCTGGTGGTGAAAGTTTCAAGCACCTATGTCAT-GGGTACGTTAGAG
ACCTCTGGTTGTGCCAGTGACAATCACCCATGCGGTCG-GGATGTCAGAG
ACTTCTGACGATGCCAGTGACAATCACCCATGCGGTCG-GGATGTCAGAG
ACCTCTGGTTGTGCCAGTGTCAATCACCCATGCGGTCG-GGATGTCAGAG
ACCTCTGGTTGTGCCAGTGACAATCACCCATGCGGTCG-GGATGTCAGAG
ACCTCTGGTTGTGCCAGTGACAATCACCCATGCGGTCG-GGATGTCAGAG
ACCTCTGGTTGTGCCAGTGACAATCACCCATGCGGTCG-GGATGTCAGAG
ACCTCTGGTTGTGCCAGTGACAATCACCCATGCGGTCG-GGATGTCAGAG
TCTTCCGGTAGCGGCAGGGTCAAGCGCCCACGACGCAG-CGAAGTGAGAG
TCTTCCGGTAGCGGCAGGGTCAAGCGCCCACGACGCAG-CGAAGTGAGAG
TCTTCCGGTAGCGGCAGGGTCAAGCGCCCACGACGCAG-CGAAGTGAGAG
TCTTCCGGTAGCGGCAGGGTCAAGCGCCCACGACGCAG-CGAAGTGAGAG
ACGCCTGATGGTGACCGGGTCAAGTGCCGACAATGTAG-CGAGGTCACAG
ACGTCTTGCCGTCAGAAGGTCAGATGCCTAGGACGTAG-CGCAGTGAGCG
ACGTCTTGCCGTCAGAAGGTCAGATGCCTAGGACGTAG-CGCAGTGAGCG
ACCTTTGGTGAAGACACGGTCAGGTGCCTACGACGTAGAGGAGGTCAGAG
GCCTCTGGTGGTGGCAGGGCGAAGCATCTACGGCGTAGGGGTGGTCAGGG
GCCTCTGGTGGTGGCAGGGCGAAGCATCTACGGCGTAGGGGTGGTCAGGG
GCCTCTGGTGGTGGCAGGGCGAAGCATCTACGGCGTAGGGGTGGTCAGGG
GCCTCTGGTGGTGGCAGGGCGAAGCATCTACGGCGTAGGGGTGGTCAGGG
GCCTCTGGTGGTGGCAGGGCGAAGCATCTACGGCGTAGGGGTGGTCAGGG
ACCTCTAGCGCTGGCAGGGTCAGGCGCCTACGATGC-GAGGAGGTGACAG
ACCTCTAGCGCTGGCAGGGTCAGGCGCCTACGATGC-GAGGAGGTGACAG
--------------------------------------------------
--------------------------------------------------
--------------------------------------------------
--------------------------------------------------
--------------------------------------------------
GCTTCTGGTGGCGA-AGGGCTAGGCCCCTACGGCGCCGGGGAGGCGAGGG
ACTTTTGGTG-TGACAGGGTCACCTACCTGCGACGTCGGGGAGGCCAGAA
ACTTCCGGTGGTGACAGGGCTAAGCCCCTACGGCGTAGGGAAGGGCAGAG
ACTTCCGGTGGTGACAGGGCTAAGCCCCTACGGCGTAGGGAAGGGCAGAG
GCCCCTGGCAGTGAAA-GGTCCGGCACCCGCGGCGT-G---AGGCCAGTG
GCCCCTGGCAGTGAAA-GGTCCGGCACCCGCGGCGT-G---AGGCCAGTG
ACTTCCGGTGGTGACAGGGCTAGGCCCCTACGGCGTAG--GAGGGCAGAG
ACTTCCGGTGGTGACAGGGCTAGGCCCCTACGGCGTAG--GAGGACAGAG
ACCTCTGGTGGCGGCAGGCTCAGCCCCCCATGTTGC-GGGAAG-TCAAAG
ACTGCTGGTGGTGGCAGGGTTGAGCACCTAAGGCAT-GAGGAGGTCAGAG
ACCTCTGGTGATGACAGCGTGAAGCGCCTTCGACGT-GATGAAGGAAGAG
GCTTCTGGTGGCGGAAGGGCTAGGCCCCTACGGCGCCGGGGAGGCGAGGG
GCTTCTGGTGGCGGAAGGGCTAGGCCCCTACGGCGCCGGGGAGGCGAGGG
GCTTCTGGTGGCGGAAGGGCTAGGCCCCTACGGCGCCGGGGAGGCGAGGG
GCTTCTGGTGGCGGAAGGGCTAGGCCCCTACGGCGCCGGGGAGGCGAGGG
GCTTCTGGTGGCGGAAGGGCTAGGCCCCTACGGCGCCGGGGAGGCGAGGG
GCTTCTGGTGGCGGAAGGGCTAGGCCCCTACGGCGCCGGGGAGGCGAGGG
GCTTCTGGTGGCGGAAGGGCTAGGCCCCTACGGCGCCGGGGAGGCGAGGG
ACTGCTGGTGACAGATCGAGTACC----TGCGACGT-GGGGAGGTCAAAG
GTTTCGGGTGGTGTGAGGGTCAAGCACCCACGATGT-GGGGAGGTCAGAG
ACTCCTGGCGGTGGCGGCGCCAAGTGCCTAGGACGT-GGGGATGTTAGAG
ACTCCTGGCGGTGGCGGCGCCAAGTGCCTAGGACGT-GGGGATGTTAGAG
ACTCCTGGCGGTGGCGGCGCCAAGTGCCTAGGACGT-GGGGATGTTAGAG
GCTTCTGGCCGTGACAGAGTCCAGTGCCTGCGACGCAG-GGCGGCCTGTA
ACTTCGGGTGGTGACAGGGGCTGCTGCCCACGACGCAG-GGAGGTCAGAG
ACTTCGGGTGGTGACAGGGGCTGCTGCCCACGACGCAG-GGAGGTCAGAG
ACTTCTGGTGGTGACAGGGTCCAGCACCCACGACAT-GGGAAG-TCAGAG
GTTTCGGGTGGTGACCGGGTCAAGCACCCACGATGT-GGGGAGGTCAGAG
ACTTCGGGTGGTGACAGGGGCTGCTGCCCACGACGCAG-GGAGGTCAGAG
ACTTCGGGTGGTGACAGGGGTTGCTGCCCACGACGCAG-GGAGGTCAGAG
ACTTCGGGTGGTGACAGGGGCTGCTGCCCACGACGCAG-GGAGGTCAGAG
ACTTCGGGTGGTGACAGGGGCTGCTGCCCACGACGCAG-GGAGGTCAGAG
ACTTCGGGTGGTGACAGGGGTTGCTGCCCACGACGCAG-GGAGGTCAGAG
ACTCAGTGTGGTATCAGGGTCTT-GACCCCCTGCGT-G---AGGTCAGAG
--------------------------------------CGTAGGTGAGCG
ACTTCTGGTGGTGACAGTGTCGAGCACCTGCGACGTAGGTGTGGTCAGTG
ACTTCTGGTGGTGACAGTGTCGAGCACCTGCGACGTAGGTGTGGTCAGTG
ACTTCTGGTGGTGACAGTGTCGAGCACCTGCGACGTAGGTGTGGTCAGTG
ACTTCTGGTGGTGACAGTGTCGAGCACCTGCGACGTAGGTGTGGTCAGTG
--------------------------------------CGTAGGTGAGCG
ACTTCTGGTGGTGACAGGGCCAGGCGCCTACGCCGT-GGCGAGGCTAGAG
AATTCTGATGGTGACA-GGACGAGTACCTACGGCAT-GGGAAG-CGAGGT
GCTTCTGGTCGTGACAGGCTCAGGCGCCCACGACGTAGGTGAGGTCAGAA
GCTTCTGGTCGTGACAGGCTCAGGCGCCCACGACGTAGGTGAGGTCAGAA
-CGTCCGGTCGTGACAGGGTCCAGCGCCCACGCCGTAG------------
ACTTCCGGTCGTGACAGAGTCCAGCGCCCACGCCGGCG------------
-CGTCCGGTCGTGACAGGGTCCAGCGCCCATGCCGTAG------------
GTTTCCGGTCGTGACAGGGTCCAGCGCCCACACCGTAG------------
GCTTCCGGTCGTGACAGGGTCCAGCGCCCACGCCGGCG------------
GTTTCCGGTCGTGACAGGGTCCAGCGCCCACGCCGGCG------------
-CTTCCGGTCGTGACAGGGTCCAGCGCCCACGCCGGCG------------
ACTTCCGGTCGTGACAGGGTCCAGCGCCCACGCCGGCG------------
--------------------------------------CGTAGGTGAGCG
--------------------------------------CGTAGGTGAGCG
GCCTGTGGCGGTGGCAGGCTCAAGTGCCTGGCATGT-GGGGAGGTCACAG
GCCTGTGGCGGTGGTAGGCTCAAGTGCCTGGCATGT-GCGGAGGTCACAG
GCCTGTGGCGGTGGCAGGCTCAAGTGCATGGCATGT-GCGGAGGTCACAG
GCCTGTAGCGGTGGCAGGCTCAAGTGCCTGGCATGT-GCGGAGGTCACAG
GCCTGTGGCGGTGGCAGGCTCAAGTGCCTGGCATGT-GCGGAGGTCACAG
GCCTGTGGCGGTGGCAGGCTCAAGTGCCTGGCATGT-GCGGAGGTCACAG
GCCTGTGGCGGTGGCAGGCTCAAGTGCCTGGCATGT-GCGGAGGTCACAG
GCCTCTGGTGGTAGCAGGGTGGGGCGCTTACTAGGTTG--GAGCTCGGAG
GCCTCTGGTGGTAGCAGGGTGGGGCGCTTACTAGGTTG--GAGCTCGGAG
--------------------------CTTACCGCAT-G--GGGGCCAGAG
GCCTCTGGTGGTAGCAGGGTGGGGCGCTTACTAGGTTG--GAGCTCGGAG
GCTTCTCCTGGCGACAGGGTCAAGCACCTATAACGCAG-GGAGGACAGAG
GCTTCTCCTGGCGACAGGGTCAAGCACCTATAACGCAG-GGAGGACAGAG
ACTTCTCTTGGCGACAGGGTGAAGTGTCGACGGCGTCGGGGAGGTGAGTG
ACTTCTCTTGGCGACAGGGTGAAGTGTCGACGGCGTCGGGGAGGTGAGTG
ACTTCTCTTGGCGACAGGGTGAAGTGTCGACGGCGTCGGGGAGGTGAGTG
ACTGCTGGTGGTGGCGGGGCCAGGCACTCACGGCGT-GGCGAGGTCAGAG
ACTTCTCTTGGCGACAGGGTGAAGTGTCGACGGCGTCGGGGAGGTGAGTG
ACCTCTGACGGTGACAGGCTCATGCACCTGCGACAT-GGCGAAGTCAGAG
ACCTCCGACGGTGACAGGCTCATGCACCTGCGACAT-GGCAAGGTCAGAG
ACCTCCGACGGTGACAGGCTCATGCACCTGCGACAT-GGCAAGGTCAGAG
ACCTCTGGCGGTGACAGCCTCAGGCACCTGCGACAT-GGCAAGGTCAGAG
ACCTCTGGCGGTGACAGCCTCAGGCACCTGCGACAT-GGCAAGGTCAGAG
ACCCCTGGCGGTGACAGGGCCGAGCGCCTACAACATAG-GGAGGCCAGGG
ACCCCTGGCGGTGACAGGGCCGAGCGCCTACAACATAG-GGAGGCCAGGG
ACCCCTGGCGGTGACAGGGCCGAGCGCCTACAACATAG-GGAGGCCAGGG
ACTTCTCTTGGCGACAGGGTGAAGTGTCGACGGCGTCGGGGAGGTGAGTG
GCTTCTGCGGGTGACGGGCTCAGGCACCTGTGCCGTAG---CGGTTAGAG
GCCTCTGGTGGCCACAGGGCCAGGCACCGACGACGC-GCGGGGGTCCGAG
GCCTCTGGTGGCCACAGGGCCAGGCACCGACGACGC-GCGGGGGTCCGAG
GCCTCTGGTGGCCACAGGGCCAGGCACCGACGACGC-GCGGGGGTCCGAG
GCCTCTGGTGGCCACAGGGCCAGGCACCGACGACGC-GCGGGGGTCCGAG
GCCTCTGGTGGCCACAGGGCCAGGCACCGACGACGC-GCGGGGGTCCGAG
GCCTGCGGCGCGGACATGGCCCAGCGCCGACGACGT-GGGGAGGTCG---
GCCTGCGGCGCGGACATGGCCCAGCGCCGACGACGT-GGGGAGGTCG---
GCCTGCGGCGCGGACATGGCCCAGCGCCGACGACGT-GGGGAGGTCG---
GCCTGCGGCGCGGACATGGCCCAGCGCCGACGACGT-GGGGAGGTCG---
GCCTGCGGCGCGGACATGGCCCAGCGCCGACGACGT-GGGGAGGTCG---
ACTTGCGACGGTCACAGGGTCGCGCGCCTGCGCCGCAG-CGAAGTCGGGG
GCCTCTGGTGGCCACAGGGCCAGGCACCGACGACGC-GCGGGGGTCCGAG
ACTTGCGGCGGTCACAGGGTCGCGCGCCTGCGCTGCAG-CGAAGTCGGGG
ACTTGCGGCGGTCACAGGGTCGCGCGCCTGCGCTGCAG-CGAAGTCGGGG
ACTTGCGGCGGTCACAGGGTCGCGCGCCTGCGCTGCAG-CGAAGTCGGGG
ACTTGCGGCGGTCACAGGGTCGCGCGCCTGCGCTGCAG-CGAAGTCGGGG
ACTTGCGGCGGTCACAGGGTCGCGCGCCTGCGCTGCAG-CGAAGTCGGGG
ACTTGCGGCGGTCACAGGGTCGCGCGCCTGCGCTGCAG-CGAAGTCGGGG
ACTTGCGGCGGTCACAGGGTCGCGCGCCTGCGCTGCAG-CGAAGTCGGGG
ACTTGCGGCGGTCACAGGGTCGCGCGCCTGCGCTGCAG-CGAAGTCGGGG
ACTTGCGGCGGTCACAGGGTCGCGCGCCTGCGCTGCAG-CGAAGTCGGGG
ACTTCTGGTGGCCACAGGGTCGAGCGCGGAGGGCGT-GGTGAAGTCAGAG
GCCTCTGGTGGCCACAGGGTCAGGCACCGACGACGC-GCGGGGGTCCGAG
ACTTCTGGTGGTGAAAAGTTCCGGCA--GATGCCGT-G------------
ACTTCTGGCGGTGACAAGGTCAAGCACCAACGACGT-A---AGGTCAGAG
ACTTCTGGCGGTGACAAGGTCAAGCACCAACGACGT-A---AGGTCAGAG
ACGTGAGGTGGTGACAGGGCCAGGTGCCAACGACGTAG---AGGCGAGTG
AATCTTGGTTTTGATAGGGTCAAGTACCTACAACACAGGGGCGGTCAATA
ACGTGAGGTGGTGACAGGGCCAGGTGCCAACGACGTAG---AGGCGAGTG
ACGTGAGGTGGTGACAGGGCCAGGTGCCAACGACGTAG---AGGCGAGTG
ACGTGAGGTGGTGACAGGGCCAGGCGCCAACGACGTAG---AGGCGAGTG
ACGTGAGGTGGTGACAGGGCCAGGTGCCAACGACGTAG---AGGCGAGTG
ACGTGAGGTGGTGACAGGGCCAGGCGCCAACGACGTAG---AGGCGAGTG
ACGTGAGGTGGTGACAGGGCCAGGTGCCAACGACGTAG---AGGCGAGTG
GCTTCTGGTGGTGACAAGGTCAAGCACCAGTGACGTAGGGGAGGTCAGCG
GCTTCTGGTGGTGACAAGGTCAGGCACCAGTGACGTAGGGGAGGTCAGCG
ACCTCTGGTGGTGACAGGGTTGAACACCTGCGACGT-C---AGGTTAAAG
ACCTCTGGTGGTGACAGGGTTGAACACCTGCGACGT-C---AGGTTAAAG
ACCTCTGGTGGTGGCAGGGCCAAGCACCTAGGACGTAGGGGAGGCCCGAG
ACCTCTGGTGGTGGCAGGGCCAAGCACCTAGGACGTAGGGGAGGCCCGAG
ACCTCTGGTGGTGGCAGGGCCAAGCACCTAGGACGTAGGGGAGGCCCGAG
ACGTGAGGTGGTGACAGGGCCAGGCGCCAACGACGTAG---AGGCGAGTG
ACTTCTGGTGGTGACAGGGTCAGGTGCTTACGACGT-ACAAAGGTGAGGG
ACTTCTGGTGGTGACAGGGTCAGGTGCTTACGACGT-ACAAAGGTGAGGG
ACACCTAGCGGTGGCGTTACCAAGCACCGAAGGCCTTG-TGGGGTCAGTG
ACACCTAGCGGTGGCGTTACCAAGCACCGAAGGCCTTG-TGGGGTCAGTG
ACATCTAGCGGTGGCGTTACCAAGCACCGAAGGCCTTG-TGGGGTCAGTG
ACACCTAGCGGTGGCGTTACCAAGCACCGAAGGCCTTG-TGGGGTCAGTG
GCTTCTGCTGGTGACA----------------------------------
GCTTCTGCTGGTGACA----------------------------------
GCTTCTGCTGGTGACA----------------------------------
GCTTCTGCTGGTGACA----------------------------------
CCTGCTGGCCGGGGCAAAGCCAAGTACGTTCTACGTAG--GAGGGCAGCG
GCTTCTGCTGGTAACAGGGCCATCCACCTACGACGTAGGGGAAGTCAGAG
GCTTCTGCTGGTAACAGGGCCATCCACCTACGACGTAGGGGAAGTCAGAG
ACTTCTGCTGCTGATAGGGCCAGGCACCGACGGCGT-GGGGAGGTCAGAG
ACTTCTGCTGCTGATAGGGCCAGGCACTGACGGCGT-GGGGAGGTCAGAG
ACTTCTGCTGCTGATAGGGCCAGGCACTGACGGCGT-GGGGAGGTCAGAG
ACTTCTGCTGCTGATAGGGCCAGGCACTGACGGCGT-GGGGAGGTCAGAG
ATTTCTGCTGCTGGTAGGGCCAAGAGCCTACGACGT-GGGGTGGTCAAAG
ATTTCTGCTGCTGGTAGGGCCAAGAGCCTACGACGT-GGGGTGGTCAAAG
ACTTCTGGTGATGGCAGGGTCAAGTGCCTACGACGCAG-CGGGGTCAGAG
ACTTCTGGTGATGGCAGGGTCAAGTGCCTACGACGCAG-CGGGGTCAGAG
ACTTCTGGTGATGGCAGGGTCAAGTGCCTACGACGCAG-CGGGGTCAGAG
ACTTCTGGTGATGGCAGGGTCAAGTGCCTACGACGCAG-CGGGGTCAGAG
ACTTCTGGTGATGGCAGGGTCAAGTGCCTACGACGCAG-CGGGGTCAGAG
GCTTCTGCTGGTGACAGGGCCATCCACCCACAACGTAGGGGAGGTCGGAG
GCTTCTGCTGGTGACAGGGCCATCCACCCACAACGTAGGGGAGGTCGGAG
GCTTCTGCTGGTGACAGGGCCATCCACCCACAACGTAGGGGAGGTCGGAG
GCTTCTGCTGGTGACAGGGCCATCCACCCACAACGTAGGGGAGGTCGGAG
GCTTCTGCTGGTGACAGGGCCATCCACCCACAACGTAGGGGAGGTCGGAG
GCTTCTGCTGGTGACAGGGCCATCCACCCACAACGTAGGGGAGGTCGGAG
ACCTCTGGCGCTGACAGGGTCAAGCACCCACGGCGCAGAGGAGGGCAGAG
ACCTCTGGCGCTGACAGGGCCAAGCACCCACGGCGCAGAGGAGGGCAGAG
ACCTCTGGCGCTGACAGGGTCAAGCACCCACGGCGCAGAGGAGGGCAGAG
ACCTCTGGCGCTGACAGGGCCAAGCACCCACGGCGCAGAGGAGGGCAGAG
ACTTCTGGTGGTGACAGGGCTAGGCCCCTGGAGTGC-G-GAAGGTCAGAG
--------------------------------------------------
--------------------------------------------------
-CCCCTGACGGTGGCAGTGTCAAGCGCCTACGACAT-GGGGAGGTCAGAG
ACTTCTGGTGGTGATAGGGCCAAGCACCCGCCACGCAG-AAAGGTGAGAA
ACCTCTGATGGTGACGGGGTCAAGCACCTACGACGTAGGGGATGTCGGAG
ACCTCTGATGGTGACGGGGTCAAGCACCTACGACGTAGGGGATGTCGGAG
ACTTCCGCTGGCGACAGGGCCGAGTACACGCGACGT-GGGTAGGTCAAGG
ACTTCCGCTGGCGACAGGGCCGAGTACACGCGACGT-GGGTAGGTCAAGG
ACTTCCGCTGGCGACAGGGCCGAGTACACGCGACGT-GGGTAGGTCAAGG
ACCTCTGGTAGTGACA----------------------------------
ACCTCTGGTAGTGACA----------------------------------
ACCTCTGGTAGTGACA----------------------------------
ACCTCTGATGGTGACGGGGTCAAGCACCTACGACGTAGGGGATGTCGGAG
ACCTCTGGTAGTGACA----------------------------------
ACCTCTGGTAGTGACA----------------------------------
ACTTCTGTTGGTGACAGGGTCAAGCGTCGAAGACAT-GGGGAAGTGAGAG
GCCTCTGGTGGTGACA--GTCAAGTGTCTACGATGTAG-GGAAGCCAGAG
ACTTCTGCTGGTAACAGGCGCGAGCACCCACGAAGT-G---AGGTCAGAG
GCTTCTGCTGGT--------------------------------------
GCTTCTGCTGGT--------------------------------------
GCTTCTGCTGGT--------------------------------------
GCTTCTGCTGGT--------------------------------------
GCTTCTGGTGGTGACGGGGTCAGGTGCCTACGCCGCAG-GGCGGTCAGAG
ACTCCTGGTGGTGGCAGGGCCCGGTGCCCGCAACGCAG-CGAGGTCCGAG
ACTCCTGGTGGTGGCAGGGCCCGGTGCCCGCAACGCAG-CGAGGTCCGAG
ACTCCTGATGGTGGCAGGGCCCGGTGCCCGCAACGCAG-CGAGGTCAGAG
ACTCCTGGTGGTGGCAGGGCCCGGTGCCCGCAACGCAG-CGAGGTCCGAG
ACTCCTGGTGGTGGCAGGGCCCGGTGCCCGCAACGCAG-CGAGGTCCGAG
ACTCCTGGTGGTGGCAGGGCCCGGTGCCCGCAACGCAG-CGAGGTCTGAG
ACTCCTGGTGGTGGCAGGGCCCGGTGCCCGCAACGCAG-CGAGGTCAGAG
GCTTGTGGTGGTGACGGGGTCTGGTGCCTACGCCACAGGGGGGGTCAGAG
GCTTGTGGTGGTGACGGGGTCTGGTGCCTACGCCGCAGGGGGGGTCAGAG
GCTTGTGGTGGTGACGGGGTCTGGTGCCTACGCCGCAGGGGGGGTCAGAG
GCTTGTGGTGGTGACGGGGTCTGGTGCCTACGCCGCAGGGGGGGTCAGAG
ACCTGTGGCGATGACAGGGTCAGGGGCCTAAGATGTCG-GGAGGTCGGGG
ACCTGTGGCGATGACAGGGTCAGGGGCCTAAGACGTCG-GGAGGTCGGGG
ACTTCTGGTGATGACAGGGTCAAGCGCCTACGACGT-GGGGAAGCCAGAG
ACTTCTGGTGATGACAGGGTCAAGCGCCTACGACGT-GGGGAAGCCAGAG
--------------------------------------------------
ATCTCTGCTGGTGACAGCGCCAAGCGCCTACAACGTAG-GAAAGTCAGAG
GCTTGTGGTGGTGACGGGGTCAGGTGCCTACGCCGCAGGGGGGGTCAGAG
ACTCCTGGCGGTGACAGGGTCCCGTGACTAGGACGT-G-GGGGGTCAGAG
ACTCCTGGCGGTGACAGGGTCCCGTGACTAGGACGT-G-GGGGGTCAGAG
ACTCCTGGCGGTGACAGGGTCCCGTGACTAGGACGT-G-GGGGGTCAGAG
AATTCTGGTGCTGACAGGGTCAAGCACCTACGACGT-GGGGAGGTTAGAA
ACTTTTGGTGGCGAAAGGGCCAGGCACCTGCGACGT-G-GGGGGTGAGAG
GCCTTCGGCGGCGACAAGGACGAGCCCCTATGGCGT-AGAGAGGTCAGAG
GCGTGTGGTGGGGACAGGGTCAGGCAGCCGTGTCGT-GGGGAGGTCGATG
GCGTGTGGTGGGGACAGGGTCAGGCAGCCGTGTCGT-GGGGAGGTCGATG
GCGTGTGGTGGGGACAGGGTCAGGCAGCCGTGTCGT-GGGGAGGTCGATG
ACTTTTGGTGGCGAAAGGGCCAGGCACCTGCGACGT-G---GGGTGAGAG
ACTTTTGGTGGCGAAAGGGCCAGGCACCTGCGACGT-G---GGGTGAGAG
ACTTTTGGTGGCGAAAGGGCCAGGCACCTGCGACGT-G-GGGGGTGAGAG
-CCTGTGGTGGC---AAGCTCACGTACCTAGAACGTAG---AGGTCAGAG
ACTTCTGGTGGTGACAGCATCAGGCACCTAGGGCGT-GGTGATGTCAGAG
ACTTCCGGTGGTGCCAGAATCAGGTGTCTACGGCGT-GGGGAAGTCAGTG
ACCTCTGGCGGTCGCAGGTTCGGAGACCTATGGCGTAG-GGAGTTCAGAG
ACCATCAGAGGTGGCAGGGCG-----------------------------
ACTTCCGGTGGCGACAGGGTCAGGCACCGAGGACTT-GGAGAAGCCAGAG
ACTTCCGGTGGCGACAGGGTCAGGCACCGAGGACTT-GGAGAAGCCAGAG
ACTTCCGGTGGCGACAGGGTCAGGCACCGAGGACTT-GGAGAAGCCAGAG
ACTTCCGGTGGCGACAGGGTCAGGCACCGAGGACTT-GGAGAAGCCAGAG
ACCATCAGAGGTGGCAGGGCG-----------------------------
CGCTCTGGTGGTCACAGGGTCAAGCACTCACGACGTAG---AGGTCAGAG
ACTTTTCCTGATGACAGGGTAATATGCCTGAGACGT-G---AGGTCTTAG
--------------------------------------------------
ACCTCTGGTCGTGACACAGTCAAGCGCCTACGACATAG-CGAGGTCAGAG
ACCTCTGGTCGTGACACAGTCAAGCGCCTACGACATAG-CGAGGTCAGAG
ACTTCCGGTAGTGGCAGAGTC-----------------------------
ACCTCTGGCGGTGACGGGGCCCAGCACCCACGACGCAG---GGGTCAGAG
ACCTCTGGCGGTGACGGGGCCCAGCACCCACGACGCAG---GGGTCAGAG
ACCTCTGGTGGTGACGGGGCCCAGCACCCACGACGCAG---GGGTCAGAG
ACCTCTGGTGGTGACGGGGCCCAGCACCCACGACGCAG---GGGTCAGAG
ACCTCTGGTGGTGACGGGGCCCAGCACCCACGACGCAG---GGGTCAGAG
ACCTCTCGTCGTGAGAGGGTCCGTTGCCCACGACGT-GGGCAAATCAGGG
ACCTATGGTGGTCAGAGGCTCGAGCGCCTACGACGT-GGGGAGGTCAGTG
ACCTATGGTGGTCAGAGGCTCGAGCGCCTACGACGT-GGGGAGGTCAGTG
ACCTCTGTTGGTCAGAGGGCCGCGTGCCTACGACAT-GGCGAGGTCCGTG
ACCTCTGTTGGTCAGAGGGCCGCGTGCCTACGACAT-GGCGAGGTCCGTG
ACCTCTGGTGGTGACGGGCGCG--TGCCCACGACAT-GGCGAGGTCAGTG
ACTCCTGCCGACTGCAGGTTCAAGCACCTACGACGTAG-CGAGGTAAGAG
ACCTCTGGTGGTGACGGGCACGTG--CCCACGACAT-GGCGAGGTCAGTG
--------------------------------------------------
ACTTCTGGTGGTGGCAGAGTTGAGTGCCCACGACGTAG-GGAAGTCAGAG
ACTTCTGGTGGTGGCAGAGTTGAGTGCCCACGACGTAG-GGAAGTCAGAG
ACTTCCGGTAGTGGCAGAGTC-----------------------------
ACTTCCGGTAGTGGCAGAGTC-----------------------------
ACTTCCGGTAGTGGCAGAGTC-----------------------------
ACTTCCGGTAGTGGCAGAGTC-----------------------------
ACCTCTGGCGGTGGCAGGGGCAAGCACCTACGAGCT-GGGGACGTCAGAG
ACCTCTGGTGGTGGCAGGGGCAAGCACCTACGAGCT-GGGGACGTCAGAG
ACCTCTGGCGGTGGCAGGGGCAAGCACCTACGAGCT-GGGGACGTCAGAG
ACCTCTGGCGGTGGCAGGGGCAAGCGCCTACGAGCT-GGGGACGTCAGAG
ACCTCTGGCGGTGGCAGGGGCAAGCACCTACGAGCT-GGGGACGTCAGAG
ACCTCTGGCGGTGGCAGGGGCAAGCACCTACGAGCT-GGGGACGTCAGAG
ACCTCTGGCGGTGGCAGGGGCAAGCACCTACGAGCT-GGGGACGTCAGAG
ACCTCTGGTGGTGACGGGGCCCAGCACCCACGACGCAGGGGAG-TCAGAG
ACCTCTGGCGGTGGCAGGGGCAAGCACCTACGAGCT-GGGGACGTCAGAG
AACTCGGGTGGTAAAAGCATCATCCGCCTACAGAGTAG-GGAGGCCACTG
ACCTCTGGTGGTGGTAAGGCCAGGCACCTACGGCGCAG-GGAGGTCAGAG
ACCTCTGGTGGTGGTAAGGCCAGGCACCTACGGCGCAG-GGAGGTCAGAG
GCTTCTGGTGGTGACGGGGTCAGGTGCCTACGACGT-TGGGAGGTCAGTG
ACTTCGCGTGGCGACAGGGTCAAGCACCTACAAGGTAGGGGAGACCAGAG
ACTTCGCGTGGCGACAGGGTCAAGCACCTACAAGGTAGGGGAGACCAGAG
ACTTCGCGTGGCGACAGGGTCAAGCACCTACAAGGTAGGGGAGACCAGAG
ACTTCGCGTGGCGACAGGGTCAAGCACCTACAAGGTAGGGGAGACCAGAG
-----CGTCCGTGACAGGGTCCAGCGCCTACGGCACAG-GGAGGTGAGTG
-----CGTCCGTGACAGGGTCCAGCGCCTACGGCACAG-GGAGGCGAGTG
-------------ACAGGGTCCAGCGCCTACGGCACAG-GGAGGTGAGTG
-------------ACAGGGTCCAGCGCCTACGGCACAG-GGAGGCGAGTG
GCCTCTGGTGGTGACCGGGCCAAGTGCCCACGGCAT-GGGGAGGTCAATG
ACCTCTGGTGGTGACAGCGTCAGGTGCCTACGGCGCAGGGGAGGTGAGAG
ACCTCTGGAGGTGGCAGGGCCAAGTGCCCACGGCGCAGGGGAGGTCAGAG
GCCTCTCGTGGTGACAGCGTTACGCGCCGACGACGTAGGGGAGGTCGGGG
GCCTCTCGTGGTGACAGCGTCATGCACCGACGACGTAGGGGGGGTCGGGG
GCCTCTCGTGGTGACAGCGTCATGCACCGACGACGTAGGGGAGGTCGGGG
GCCTCTCGTGGTGACAGCGCCATGCACCGACGACGTAGGGGGGGTCGGGG
GCCTCTCGTGGTGACAGCGTCATGCACCGACGACGTAGGGGGGGTCGGGG
GCCTCTCGTGGTGACAGCGTCATGCACCGACGACGTAGGGGAGGTCGGGG
ACCACTGGTGGTGACAGGGTCAAGTACCTACAATGT-A---AGGTCAGAT
ACGTCCGGTGCTGACAGGGTCAGGTACCTACGCCGT-GAGGAGGTCAGAG
ACGTCCGGTGCTGACAGGGTCAGGTACCTACGCCGT-GAGGAGGTCAGAG
ACTTCTGGTGGTGACAGGGTCAGGCACTCACGGCGT-GGGGAGGTCAGAG
ACTTCTGGTGGTGACAGGGTCAGGCACTCACGGCGT-GGGGAGGTCAGAG
ACTTCTGGTGGTGACAGGGTCAGGCACTCACGGCGT-GGGGAGGTCAGAG
ACTTGTGGTGGTGACAGGGTCA----------------------------
GCCTCTGGTGGTGACGGGGTCAGGTGTCTGCGACGTAGGGGAGGTCGGCG
GCCTCTGGTGGTGACGGGGTCAGGTGTCTGCGACGTAGGGGAGGTCGGCG
GCCTCTGGTGGTGACGGGGTCAGGTGTCTGCGACGTAGGGGAGGTCGGCG
GCCTCTGGTGGTGACGGGGTCAGGTGTCTGCGACGTAGGGGAGGTCGGCG
ACCCCTGGTGGTGACAGGGCCAAGCACACACGACGT-G---GGGTGAGGG
ACCTCTGGTGGTGCCAGGGTCAGGCACCTACGACGTAG-CGAAGTCAGAG
GCTGTTAGTGGTGACAGAGTCCAGCGCCTACGACGT-GGGGAGGTCAGGG
GCTGTTAGTGGTGACAGAGTCCAGCGCCTACGACGT-GGGGAGGTCAGGG
ACCCCTGGTGGTGACAGGGCCAAGCACACACGACGT-G---GGGTGAGGG
ACCCCTGGTGGTGACAGGGCCAAGCACACACGACGT-G---GGGTGAGGG
ACCCCTGGTGGTGACAGGGCCAAGCACACACGACGT-G---GGGTGAGGG
ACTTCTGGTGGTGACAGAGTCATGCACCCACGACGCAGGGCGGGTCAGAG
ACTTCTGGTGGTGACAGAGTCATGCACCCACGACGCAGGGCGGGTCAGAG
ACTGCAGGTGGTGACAGAGTCA----------------------------
ACCTCTGGTGGTGCCAGGGTCAGGCACCTACGACGTAG-CGAAGTCAGAG
GCTTCTGGCGGTG-CAGGCCGAAGTATCTGAGGCGCAG-GGGGGTTGGTG
AATTCTGGTGGGGTCAGGGCCAGGTACCTACGATGC-A--TTGGTCAGAG
CCTTCTGGTACTGACAGGGTCAAGCACCTACAACGT-GGGGATGTCAGAG
CCTTCTGGTACTGACAGGGTCAAGCACCTACAACGT-GGGGATGTCAGAG
AC-TTGAATGGTGCAAGGGTCGAGTGCCTACGAAGT-GGGAAAGGCAGA-
ACCTCTGGTGGTGCCAGGGTCAGGCACCCACGACGTAG-CGAAGTCAGAG
ACCTCTGGTGGTGCCAGGGTCAGGCACCTACGACGTAG-CGAAGTCAGAG
ACCTCTGGTGGTGCCAGGGTCAGGCACCTACGACGTAG-CGAAGTCAGAG
ACCTCTGGTGGTGCCAGGGTCAGGCACCTACGACGTAG-CGAAGTCAGAG
CCTTCTCGTGGTGAGAGGGCCAGGCGCCTACGACGTTG---GGGTCGGAG
CCTTCTCGTGGTGAGAGGGCCAGGCGCCTACGACGTTG---GGGTCGGAG
CCTTCTCGTGGTGAGAGGGCCAGGCGCCTACGACGTTG---GGGTCGGAG
CCTTCTCGTGGTGAGAGGGCCAGGCGCCTACGACGTTG---GGGTCGGAG
CCTTCTCGTGGTGAGAGGGCCAGGCGCCTACGACGTTG---GGGTCGGAG
ATTACTGGCTGTGGAAGGGTTTGGTGCCTA-GACGTCG---AGGTGGGGG
ACTTCTGGTGCTGACAGGGCCAGGTGGCTACGACGTTGTGGGGGACAGAG
GCTTCTGGTGCTGACAGGGCCAGGTGCCTCCAACGTAG---AGGTCAGAG
ACTTCTGGTGCTGACAGGGCCAGGTGGCTACGACGTTGTGGGGGACAGAG
ACTTCTGGTGCTGACAGGGCCAGGTGGCTACGACGTTGTGGGGGACAGAG
ACTTCTGGTGCTGACAGGGCCAGGTGGCTACGACGTTGTGGGGGACAGAG
ACCTCTGGTGATGGCAGGGTCACGTACCAGTGTCAT-GGACAG-TCAGAG
GCTTCTGGTGGTGGCAGGCTCAAGCGCCCACGACGTAG-TGAGGCTGGAG
GCTTCTGGTGGTGGCAGGCTCAAGCGCCCACGACGTAG-CGAGGCTGGAG
ACCCCTGGTGGTGACAGGGCCAGGTGCCTGGGACGT-GGGGAGGTCAGCG
ACTGCTGGTGGTGACAGGGTCAATCACCCACGACGCAGGGGGGGGCAGCG
ACCTCTGGTGATGGCAGGGTCACGTACCAGTGTCAT-GGACAG-TCAGAG
ACCTCTGGTGATGGCAGGGTCACGTACCAGTGTCAT-GGACAG-TCAGAG
ACTGCTGGTGGTGTCAGGGCCAGGCACCTACGCAG----GGATGTCAGAG
ACTGCTGGTGGTGTCAGGGCCAGGCACCTACGCAG----GGATGTCAGAG
ACTGCTGGTGGTGTCAGGGCCAGGCACCTACGCAG----GGATGTCAGAG
ACTGCTGGTGGTGTCAGGGCCAGGCACCTACGCAG----GGATGTCAGAG
ACTGCTGGTGGTGTCAGGGCCAGGCACCTACGCAG----GGATGTCAGTG
GCTTCTGGTGGTGGCAGGCTCAAGCGCCCACGACGTAG-CGAGACTAGAG
GCTTCTGGTGGTGGCAGGCTCAAGCGCCCACGACGTAG-CGAGGCTAGAG
GCTTCTGGTGGTGGCAGGCTCAAGCGCCCACGACGTAG-CGAGGCTAGAG
A-CTCTAATCCTGAAAGGGTCAGGCACCTGCAATGTAGGGGAGTTCAGAG
ACCCCTGGTGGTGACAGGGCCAGGTGCCTGGGACGT-GGGGAGGTCAGCG
ACCCCTGGTGGTGACAGGGCCAGGTGCCTGGGACGT-GGGGAGGTCAGCG
ACCCCTGGTGGTGACAGGGCCAGGTGCCTGGGACGT-GGGGAGGTCAGCG
ACCCCTGGTGGTGACAGGGCCAGGTGCCTGGGACGT-GGGGAGGTCAGCG
ACCCCTGGTGGTGACAGGGCCAGGTGCCTGGGACGT-GGGGAGGTCAGCG
ACCCCTGGTGGTGACAGGGCCAGGTGCCTGGGACGT-GGGGAGGTCAGCG
ATTACTGGCTGTGA-AGGGT-TGGTGCCTA-GACGTCG---AGGTGGGGG
ATTACTGGCTGTGA-AGGGT-TGGTGCCTA-GACGTCG---AGGTGGGGG
ATTACTGGCTGTGA-AGGGT-TGGTGCCTA-GACGTCG---AGGTGGGGG
ACCCCTGGTGGTGACAGGGCCAGGTGCCTAGGCCGT-GGGGAGGTCAGCG
GCTTCTAGTCGTGATAGGGTCAAGCATCTACAACGTCGGGGAG-TCAGAG
GCTTCTGGTGGTGACAGGGTCAGGTGCCTCCACAGG-GGGGAGGCCAGCG
GCTTCTGGTGGTGACAGGGTCAGGTGCCTCCACAGG-GGGGAGGCCAGCG
GCTTCTGGTGGTGACAGGGTCAGGTGCCTCCACAGG-GGGGAGGCCAGCG
GCTTCTGGTGGTGACAGGGTCAGGTGCCTCCACAGG-GGGGAGGCCAGCG
ACCTCGGGTGGTGGCAGGGCCCCGCACCGACGACGTAGGGGAGGTCAGAG
ACCTCGGGTGGTGGCAGGGCCCCGCACCGACGACGTAGGGGAGGTCAGAG
ACCTCGGGTGGTGGCAGGGCCCCGCACCGACGACGTAGGGGAGGTCGGAG
ACCTCGGGTGGTGGCAGGGCCCCGCACCGACGACGTAGGGGAGGTCGGAG
ACCTCGGGTGGTGGCAGGGCCCCGCACCGACGACGTAGGGGAGGTCGGAG
ACCTCGGGTGGTGGCAGGGCCCCGCACCGACGACGTAGGGGAGGTCAGAG
ACCTCGGGTGGTGGCAGGGCCCCGCACCGACAACGTAGGGGAGGTCAGAG
ACCTCGGGTGGTGGCAGGGCCCCGCACCGACAACGTAGGGGAGGTCAGAG
ACCTCGGGTGGTGGCAGGGCCCCGCACCGACGACGTAGGGGAGGTCAGAG
GCTTCTAGTCGTGATAGGGTCAAGCATCTACAACGTCGGGGAG-TCAGAG
ACTTCTGGTGATGACAAGGTCAAGCACCCGCGATGT-GGGGAGGTCAGAG
ACTTCTGGTGATGACAAGGTCAAGCACCCGCGATGT-GGGGAGGTCAGAG
GCTTCTGGTGGTGACAGGGTCAGGTGCCTCCACAGG-GGGGAGGCCAG--
ACTTCTGGCGGTGACAGGGTGAGGTGCCGACGACGT-GGGGAGGCCCGAG
ACTTCTCGTGGTGACAGGATCC-G----TGCGATGC--------------
ACTTCTCGTGGTGACAGGATCC-G----TGCGATGC--------------
ACTTCTCGTGGTGACAGGATCC-G----TGCGATGC--------------
ACTTCTCGTGGTGACAGGGTCC-G----TGCGATGC--------------
ACTTCTCGTGGTGACAGGGTCC-G----TGCGATGC--------------
ACTTCTCGTGGTGACAGGGTCC-G----TGCGATGC--------------
ACTTCTCGTGGTGACAGGGTCC-G----TGCGATGC--------------
ACTTCTCGTGGTGACAGGATCC-G----TGCGATGC--------------
ACTTCTCGTGGTGACAGGGTCC-G----TGCGATGC--------------
ACTTCTCGTGGTGACAGGGTCC-G----TGCGATGC--------------
ACTTCTCGTGGTGACAGGGTCC-G----TGCGATGC--------------
ACTTCTCGTGGTGACAGGATCC-G----TGCGATGC--------------
ACTTCTGCTGGTGACAGGGTCAGGCAGCTGTTTCGT-G---AGGTCAGAG
---------------------------CTACAAAGT-GGGTAGGTCGACG
CCTTCTGGTGATGACAGGGTCAGGCACCCGCGACGT-GGGGAGGTGAGAG
CCTTCTGGTGATGACAGGGTCAGGCACCCGCGACGT-GGGGAGGTGAGAG
CCTTCTGGTGATGACAGGGTCAGGCACCCGCGACGT-GGGGAGGTGAGAG
CCTTCTGGTGATGACAGGGTCAGGCACCCGCGACGT-GGGGAGGTGAGAG
---------------------------CTATGGCGTAGGGGAGGTCAGAG
ATTTCTGGTGGTGACAGGGTCCAGTGCCTGCGGCTTAG-GGAGCCCAGGG
ACTGCCGGTCGTGACTGCGTCGTGTGCCTGCGACGT-GGGGAAGTGAGAG
ACTTCTGGTGGTGGCACGCTCAAACGCGCATGATGT-GGGGGGGTCAGAG
ACCTCTGGTGGTGACAGGGTCAGGCGCGCATGACGCAG-GGAGGTCAGAG
ACTTCTCGTCGCGGCAGGGCCACGCGCATGAGGCTT-GGGGAGGTGAGTG
ACTTCTCGTCGCGGCAGGGCCACGCGCATGAGGCTT-GGGGAGGTGAGTG
ACTTCTCGTCGCGGCAGGGCCACGCGCATGAGGCTT-GGGGAGGTGAGTG
AACACTGGTGGTGACAAGGCTAGGCACCTACGAC-T-GGGAAGGACAGAG
AACACTGGTGGTGACAAGGCTAGGCACCTACGAC-T-GGGAAGGACAGAG
AACACTGGTGGTGACAAGGCTAGGCACCTACGAC-T-GGGAAGGACAGAG
ACTTCTGGTGGTGGCACGCTCAAACGCCCATGATGT-GGGGGGGTCAGAG
--------------------------------------GGGGGGTCAGAG
ACTTCTGGTGGTGGCACGCTCAAACGCCCATGATGT-GGGGGGGTCAGAG
ACTTCTGGTGGTGGCACGCTCAAACGCCCATGATGT-GGGGGGGTCAGAG
ACTTCTGGTGGTGGCACGCTCAAACGCCCATGATGT-GGGGGGGTCAGAG
CCTTCTGGTCGTCGCAGGGTCAGGTGCCTATGGCGCAG-CGAAGTCAGGG
CCTTCTGGTCGTCGCAGGGTCAGGTGCCTATGGCGCAG-CGAAGTCAGGG
ACTTCGGATGGTGCCAGGGCCTGGTGCCTGTGACGTAGGAGATGTCAGAG
ACTTCGGATGGTGCCAGGGCCTGGTGCCTGTGACGTAGGAGATGTCAGAG
ACCTCTGGTGGTCTCACAGCCGGG--CCTCCATCCT-G-TGACGTAAGAG
ACTCCTGGCGCCGACAGGGTCTAGCGCCTGCGACAC-GGGGAAGCCAGGG
ACTCCTGGCGCCGACAGGGTCTAGCGCCTGCGACAC-GGGGAAGCCAGGG
ACTCCTGGCGCCGACAGGGTCTAGCGCCTGCGACAC-GGGGAAGCCAGGG
ACCTCTGGTGGTGACAGGGTCAGGCGCGCATGACGTAG-GGAGGTCAGAG
ACCTCTGGTGGTGACAGGGTCAGGCGCGCATGACGTAG-GGAGGTCAGAG
ACCTCTGGTGGTGACAGGGTCAGGCGCGCATGACGT-GGGGAGGTCAGAG
ACCTCTGGTGGTGACAGGGTCAGGCGCGCATGACGTAG-GGAGGTCAGAG
ACCTCTGGTGGTGACAGGGTCAGGCGCGCATGACGTAG-GGAGGTCAGAG
ACTTCT-GTGGTGACGGGGTCAGGTGCCTACGACGT-GGGAATGCCAGGA
GCCTCTGGTGGTGACACGATCAAGGG--TCATGCGT-CGAGAAGTGAGAG
ACATCAGGTGGTGAAAACTTCACGCACCTTGGACAT-G-GCGGGTCAGAC
ACTTCTGGTGGTGACAGGGCCAGGCACCCACGACAC-GTGTAGGACAGAG
ACTTCTGGTGGTTACAGGGTCAAGCACCAGTGACGTAG-GGAGTTCAGCA
ACCTCTGGTGGTGACAGGGCCAAGCACCTGTGACGTAGGGGTGGAGAGGG
ACCTCTGGTGGCGACAGGGCCAAGCACCTGTGACGTAGGGGTGGAGAGGG
ACCTCTGGTGGCGACAGGGCCAAGCACCTGTGACGTAGGGGTGGAGAGGG
ACCTCTGGTGGCGACAGGGCCAAGCACCTGTGACGTAGGGGTGGAGAGGG
ACCTCTGGTGGCGACAGGGCCAAGCACCTGTGACGTAGGGGTGGAGAGGG
ACCTCTGGTGGCGACAGGGCCAAGCACCTGTGACGTAGGGGTGGAGAGGG
ACCTCTGGTGGCGACAGGGCCAAGCACCTGTGACGTAGGGGTGGAGAGGG
GCTTGCGGTGGTGAAATGGTAAAGCACCTGCGACGG-GGGGAGGTCAGAG
GCTTGCGGTGGTGAAATGGTAAAGCACCTGCGACGG-GGGGAGGTCAGAG
ACTCGCGG-GGTGACAGGTGCAAGCACC----------------------
GCTTGCGGTGGTGACAGGTGCAAGCACC----------------------
ACATCAGGTGGTGAAAACTTCACGCACCTTGGACAT-G-GCGGGTCAGAC
ACATCAGGTGGTGAAAACTTCACGCACCTTGGACAT-G-GCGGGTCAGAC
ACATCAGGTGGTGAAAACTTCACGCACCTTGGACAT-G-GCGGGTCAGAC
ACATCAGGTGGTGAAAACTTCACGCACCTTGGACAT-G-GCGGGTCAGAC
ACATCAGGTGGTGAAAACTTCACGCACCTTGGACAT-G-GCGGGTCAGAC
GCCTCTGGTGGTGGCAGGGCCAAGTGCCTACGACGT-GGGGAGGCCAGAG
GCCTCTGGTGGTGGCAGGGCCAGGTGCCTACGACGT-GGGGAGGCCAGAG
GCCTCTGGTGGTGGCAGGGCCAAGTGCCTACGACGT-GGGGAGGCCAGAG
GTCTCTGGTGGTGGCAGGGCCGAGTGCCTACGACGT-GGGGAGGCCAGAG
GTCTCTGGTGGTGGCAGGGCCGAGTGCCTACGACGT-GGGGAGGCCAGAG
AGCTCTGGCGGTCACAGGGCCGAGCGCCAGCGACGT-G----GGGAAGCC
AGCTCTGGCGGTCACAGGGCCGAGCGCCAGCGACGT-G----GGGAAGCC
ACTTCTGGTGGTGACAGGGCCAGGCACCCACGACAC-GTGTAGGACAGAG
--------------------------------------------------
--------------------------------------------------
GCTTCTGGTGGTGCCAGTGACAAGTGCCGACGACGTAGGGGAGGCCAGAG
GCTTGCGGTGGTGAAATGGTAAAGCACCTGCGACGG-GGGGAGGTCAGAG
AATTCTAGTGGTGACAGGACCAAGCACCTACGACCT-GGGGAGGTTCGAG
ACATCTGGTGATGACAGGGTCAAGCACCTGCTACGTTGGGGGGGGTGGAG
ACATCTGGTGATGACAGGGTCAAGCACCTGCTACGTTGGGGGGGGTGGAG
ACATCTGGTGATGACAGGGTCAAGCACCTGCTACGTTG--GGGGGTGGAG
ACCTCTGGTGGTGACAGGGCCAAGTGCCTACGACGT-GGGGAGGCCAGAG
ACCTCTGGTGGTGACAGGGCCAAGTGCCTACGACGT-GGGGAGGCCAGAG
ACTTCCAGTGGTGGCAGAATCATGTACCTGCGACGT-GGGGAGATTAGGG
GCCTCTGGTGGTGGCAGGGCCGAGTGCCTACGACGT-GGGGAGGCCAGAG
GCCTCTGGTGGTGGCAGGGCCAAGTGCCTACGACGT-GGGGAGGCCAGAG
ACTTGTGGTGGTGACATTGTCGGGCACCTAAGCTGGAG-GGAGGTCGGAG
GCTTGTGGTGGTGACATTGTCGGGCACCTAAGCTGGAG-GGAGGTCGGAG
GCTTGTGGTGGTGACATTGTCGGGCACCTAAGCTGGAG-GGAGGTCGGAG
ACCTCTGGTGGCGTCACGGTGAAGCGCCTGCCACGT-GGGGAGGTCAGAG
CCCTCTTGTGGGGGCTGGATCAGGCACCCACGCCGC-GGGGAGGACAGAG
ACCTCCGGCGGTGACACGGTCACGCACCCACGACGT-GGGGAGGTGAGAG
ACCTCCGGCGGTGACACGGTCACGCACCCACGACGT-GGGGAGGTGAGAG
ACCTCCGGCGGTGACACGGTCACGCACCCACGACGT-GGGGAGGTGAGAG
ACCTCCGGCGGTGACACGGTCACGCACCCACGACGT-GGGGAGGTGAGAG
ACCTCCGGCGGTGACACGGTCACGCACCCACGACGT-GGGGAGGTGAGAG
ACCTCCGGCGGTGACACGGTCACGCACCCACGACGT-GGGGAGGTGAGAG
ACCTCCGGCGGTGACACGGTCACGCACCCACGACGT-GGGGAGGTGAGAG
ACCTCCGGCGGTGACACGGTCACGCACCCACGACGT-GGGGAGGTGAGAG
ACGTCTGGTGCTGACAGGGCCAAGTGCCGACGACGTAG-GGAGGCCGGAG
ACGTCTGGTGCTGACAGGGCCAAGTGCCGACGACGTAG-GGAGGCCGGAG
ACGTCTGGTGCTGACAGGGCCAAGTGCCGACGACGTAG-GGAGGCCGGAG
GCGTCTGGTGCTGACAGGGCCAAGTGCCGACGACGTAG-GGAGGCCGGAG
GCCTCTGGCGGTGACAGGGTCAGGTGCCTGCGGCGT-GGGGAGGCCAGAG
GCCTCTGGCGGTGACAGGGTCAGGTGCCTGCGGCGT-GGGGAGGCCAGAG
CCCTCTCGTGGGGGCTGGATCAGGCACCTACGCCGC-GGGGAGGACAGAG
CCTTCTTGTGGGGGCTGGATCAGGCACCCACGCCGC-GGGGAGGACAGAG
CCCTCTCGTGGGGGCTGGATCAGGCACCCACGCTGC-GGGGAGGACAGAG
CCCTCTCGTGGGGGCTGGATCAGGCACCCACGCTGC-GGGGAGGACAGAG
ACCTCCGGCGGTGACACGGTCACGCACCCACGACGT-GGGGAGGTGAGAG
ACCTCCGGCGGTGACACGGTCACGCACCCACGACGT-GGGGAGGTGAGAG
AC------------------CAAGTGCTTATGGCGTAGGCGTGGTGAGAG
AC------------------CAAGTGCTTATGGCGTAGGCGTGGTGAGAG
AC------------------CAAGTGCTTATGGCGTAGGCGTGGTGAGAG
ACGTCTGCTGCTGACAGGGCCAAATGCCGACGACGTAG-GGAGGCCGGAG
ACGTCTGGTGCTGACAGGGCCAAGTGCCGACGACGTAG-GGAGGCCGGAG
ACGTCTGGTGCTGACAGGGCCAAGTGCCGACGACGTAG-GGAGGCCGGAG
ACGTCTGGTGCTGACAGGGCCAAGTGCCGACGACGTAG-GGAGGCCGGAG
GCTTCTGGTGGTGACCGGGCCGAGTGCCTAGGACGTTGGGGAGGTCAGTG
GCCCCTGGCGGCGACAGGATCAAGTTCCTGCGACGTAG-GAAAGTCAGTG
GCCTCGGGTGGTGACAGGGA----CACCTACGGCGT-GGCAAAGTCAGAG
ACCTCTGGTGGTGACAGGGGCAAGTGTCTGTGACGTAGGGGAAGTCATCG
ACCTCTGGTGGTGGCACGGTGAAGCGCCTGCCACAT-GGGGAGGTCAGAG
ACCTCTGGTGGTGGCACGGTGAAGCGCCTGCCACAT-GGGGAGGTCAGAG
ACCTCTGGTGGTGGCACGGTGAAGCGCCTGCCACGT-GGGGAGGTCAGAG
ACCTCTGGTGGTGGCACGGTGAAGCGCCTGCCACGT-GGGGAGGTCAGAG
ACCTCTGGTGGTGGCACGGTGAAGCGCCTGCCACGT-GGGGAGGTCAGAG
ACCTCTGGTGGTGTCACGGTGAAGCGCCTGCCACGT-GGGGAGGTCAGAG
ACATCTGGTGGTGACACGGTCACGCACCCACGACGT-GGGGAGGTGAGAG
ACCTCCGGCGGTGACAGGGTCGAGTATCTACGGCGTTGAGGAGGTCAGTG
ACCTCCGGCGGTGACAGGGTCGAGTATCTACGGCGTTGAGGAGGTCAGTG
GCCTCGGGTGGTGACAGGGACACCTAC-GGCGTGGC-A---AAGTCAGAG
GCCTCGGGTGGTGACAGGGACACCTAC-GGCGTGGC-A---AAGTCAGAA
GCCTCGGGTGGTGACAGGGACACCTAC-GGCGTGGC-A---AAGTCAGAG
GCCTCGGGTGGTGACAGGGACACCTAC-GGCGTGGC-A---AAGTCAGAG
GCCTCGGGTGGTGACAGGGACACCTAC-GGCGTGGC-A---AAGTCAGAG
ACTTCCGGTGGCGACAGGGTCAGGCACCTTCGACGG-GGGGAAGTCGGTG
ACTTCCGGTGGCGACAGGGTCAGGCACCTTCGACGG-GGGGAAGTCGGTG
ACTTCCGGTGGCGACAGGGTCAGGCACCTTCGACGG-GGGGAAGTCGGTG
TCTTCCGGTGGCGACAGGGTCAGGTATTTACGGCGT-GGAGAATTGAGAG
ACCTCTGGTGATGGCAGGGCCAGGTGCCTGTGACGT-GGCAAGCTCAGAG
ACCTCTGGTGATGGCAGGGCCAGGTGCCTGTGACGT-GGCAAGCTCAGAG
GCTTCTGGCCGTAACAGGGTCAGACGCCTAC-CCCC-G--CAGGTCGGAG
GCTTCTGGCCGTAACAGGGTCAGACGCCTAC-CCCC-G--CAGGTCGGCG
GCTTCTGCTGGTGTCAGGGCCAGGTGCCTACGACGT-G--GCGGTCAGAG
------------------------------------AGG-GAGGGCAGAG
ACTTCTGGTTATGAGGAATTCACGTACCCACGTAGCAG-GAAGGTCAGAG
ACATCTGGCCGTGACAGCGTCCATTAACCACGACAT-GGGGAAGTCCTAG
GCTTCCGCTGGTGACAGGGTCAGGTACCCACAATGGTG---AGATCAGAG
ACTTCTGGCGGCGGCAGGGCCAGGTGCCTAGGCCGCAG-GGAAGCGAGAG
ACTTCTGGCGGCGGCAGGGCCAGGTGCCTAGGCCGCAG-GGAGGCGAGAG
ACTTCTGGCGGCGGCAGGGCCAGGTGCCTAGGCCGCAG-GGAGGCGAGAG
ACTTCTGCTGGTGGCGCGGCCGAGTGCCTGCGCTGTAGGGGAGGCCAGAG
ACTTCTGCTGGTGGCGCGGCCGAGTGCCTGCGCTGTAGGGGAGGCCAGAG
ACTTTGGGTGGTGACAAAGTTAGGTTCCTACAACGC-GGGGAAGTCAGAG
ACTTCTGGTGGTGGCAGGGCCGTGCACCACCTACGTAGGGGAGGCCAGAG
ACCTCTGGTGGTGGCAGGGCCAGGTGCCTAGGACGCAG-GAACGTCAGGT
ACCTCTGGTGGTGGCAGGGCCAGGTGCCTAGGACGCAG-GAACGTCAGGT
ACCTCTGGTGGTGGCAGGGCCAGGTGCCTAGGACGCAG-GAGCGTCAGGT
GCTTCTGGTGGTGACAGGGTCAAGCACCCACGGCTT-GGAGAAGTCAGGG
ACTTCTGGTGCTGACACGGCCTGGTGCCTACGACGTAG-CGAGCTCCAAG
ACCTCTGGCGGTGACAGGGTCAGGCACC----------GCGAGGTCAGGG
ACCTCTGGCGGTGACAGGGTCAGGCACC----------GCGAGGTCAGGG
ACCTCTGGCGGTGACAAGGTCAAGCACCTGCGAGCT-GGGGAGGGCAGAG
ACATCTGGCGGTGACTGCGTCCATCACCCACCATGT-GATGAAGCCGTAG
ACTTCCTGTAGTGACAAGGCCAAGTGCCTATGGTGTCGGGAAGGTAAGAT
GCAACTGGCGGTGACCGCGTCCCTCATCCACGATGT-GAGAAAGCCATAG
GCTTCCGCTGGCGACAGGGCTAGGCACCTGCGACGT-GGGGAGGTCGGAG
GCTTCCGCGGGCGACAGGGCTAGGCAGCTGCGACGT-GGGGAGGTCAGAG
GCTTCCGCTGGCGACAGGGCTAGGCACCTGCGACGT-GGGGAGGTCAGAG
ACCTCAGGTGGTGGCAGGGTCGAGCACTGGCGATGT-GGGGAGGTCCGAG
ACCTCTGGTGGTGACAAGGCCCGACACCTACAATGTAGGGGAGGTTCGAG
AACTCTAATAGTGCTAGAGTCAGGTGCCTACGATGT-G---AGGTCAGAC
AACTCTAATAGTGCTAGAGTCAGGTGCCTACGATGT-G---AGGTCAGAC
AACTCTAATAGTGCTAGAGTCAGGTGCCTACGATGT-G---AGGTCAGAC
ACCTCTGGCGGTGACAGGGTCAGGTGCCTTCGACGT-GGGGAGGTCAGAG
ACTTCTGGTGGTGGCAGGGCCGTGCACCACCTACGTAGGGGAGGCCAGGG
ACTTCTGGTGGTGGCAGGGCCGTGCACCACCTACGTAGGGGAGGCCAGGG
ACCTCTGGTGGTGGCGGGGCCGAGTGCCTACGGCGT-GGGGAGGTGATGG
GCTTCTGGCCGTAACAGGGTCAGACGCCTACC-CCC-G--CAGGTCGGAG
GCTTCTGGCCGTAACAGGGTCAGGCGCCTACC-CCC-G--CAGGTCGGAG
GCTTCTGGCCGTAACAGGGTCAGGCGCCTACC-CCC-G--CAGGTCGGAG
GCTTCTGTTGGTGTCAGGGCCAGGTGCCTACGACGT-G---ACGTCAGAG
GCATCTGGTGGTGGCATGGCCTAGTGCCTACGACGTAG---CGGCCACAG
GCATCTGGTGGTGGCATGGCCTAGTGCCTACGACGTAG---CGGCCACAG
GCATCTGGTGGTGGCATGGCCTAGTGCCTACGACGTAG---CGGCCACAG
ACTTCTGGTGCTGACACGGCCTGGTGCCTACGACGTAG-CGAGCTCCAAG
ACTTCTGGTGCTGACACGGCCTGGTGCCTACGACGTAG-CGAGCTCCAAG
ACTTCTGGTGCTGACATGGCCTGGTGCCTACGACGTAG-CGAGCTCCAAG
ACCTCTGGCGGTAACAAGGTCAAGCACCTGCGAGCT-GGGGAGGGCAGAG
ACCTCTGGCGGTGACAAGGTCAAGCACCTGCGAGCT-GGGGAGGGCAGAG
ACTTCTGGTCGTGGCATGGCCAGGTGCCTACGATGTAG---AGGTCAGCA
ACCTGTGGTTAGGAGAGGGT-----------------G---AAGCCAGAG
ACCTGTGGTTAGGAGAGGGT-----------------G---AAGCCAGAG
ACCTGTGGTTAGGAGAGGGT-----------------G---AAGCCAGAG
ACCTGTGGTTGTGACACGGGCAGGCGCCTACGACGTAGAGGAGGCCTGGG
ACCTGTGGTTGTGACACGGGCAGGCACCTACGACGTAGAGGAGGCCTGGG
ATTCCTGGTGGTGACAGGGTCGAGCACTTAGAACTTAGGGAAAGCCTAAG
GCCTCTGTTGGACCCAGG-AAAACTGCCTACATCTCTG-GGAGATCAGAT
ACCTGTGGTGTTGATAAGGTCCAGCGCCGGCGCCGT-GTGGAGGTGAGAG
ACCTGTGGTGTTGACAAGGTCCAGCGCCGGCGCCGT-GTGGAGGTGAGAG
ACCGCTTGTGGTGACAGGGTCCGGTGCCTGCGACACAG-GGAGGCCAGCG
ACCGCTTGTGGTGACAGGGTCCGGTGCCTGCGACACAG-GGAGGCCAGCG
ACCGCTTGTGGTGACAGGGTCCGGTGCCTGCGACACAG-GGAGGCCAGCG
ACCTGTGACCGTGATAGGGACATGTGCTCACGATGTAGGGGAGGGCAGAG
ACCTGTGACCGTGATAGGGACATGTGCTCACGATGTAGGGGAGGGCAGAG
ACCTGTGGTTGTGACACGGGCAGGCACCTACGACGTAGAGGAGGCCTGGG
ACCTGTGGTTGTGACACGGGCAGGCGCCTACGACGTAGAGGAGGCCTGGG
--------------------------------------------------
ACCTCTGGTGGTGGCAGGGTTGAGTGCCTACGACGTAGCGCAGGCCGGAG
ACCTCTGGTGGTGGCAGGGTTGAGTGCCTACGACGTAGCGCAGGCCGGAG
ACCTCTGGTGGTGGCAGGGTTGAGTGCCTACGACGTAGCGCAGGCCGGAG
ACCTCTGGTGGTGGCAGGGTTGAGTGCCTACGACGTAGCGCAGGCCGGAG
ACCTCTGGTGGTGGCAGGGTTGAGTGCCTACGACGTAGCGCAGGCCGGAG
ACCTCTGGTGGTGACCGGGTCAGGCGCCTAGGGCGTAG--GGGGTGCGAG
ACCTCTGGTGGTGACCGGGTCAGGCGCCTAGGGCGTAG--GGGGTGCGAG
ACTTCCGGCGAT-ACAGAGTCACGTACCCGCAGTGT-A---AGGTGGGTG
ACTTCCGGCGAT-ACAGAGTCACGTACCCGCAGTGT-A---AGGTGGGTG
ACTTCTGGTGGTGACAGGGTCAAGCGCCTACGACACAG-GGAGGCCAGGG
CCTGCTGGCCGGGGCAAAGCCAAGTACGTTCTACGTAG--GAGGGCAGCG
ACCTGTGGTGTTGACAAGGTCCCGCGCCGGCGCCGT-GTGGAGGTGAGAG
ACCTGTGGTGTTGACAAGGTCCAGCGCCGGCGCCGT-GTGGAGGTGAGAG
ACCTGTGGTGTTGACAAGGTCCAGCGCCGGCGCCGT-GTGGAGGTCAGAG
ACCTGTGGTGTTGACAAGGTCCAGCGCCGGCGCCGT-GTGGAGGTGAGAG
ACCTGTGGTGTTGACAGGGTCCAGCGCCGGCGCCGT-GTGGAGGTGAGAG
ACCTGTGGTGTTGACAAGGTCCAGCGCCGGCGCCGT-GTGGAGGTGAGAG
ACCTCTGGTGGTGACAGGGTCAAGCACCTACGACAT-GGAGAGGCTAGTG
ACCTCTGGTGGTGACAGGGTCAAGCACCTACGACAT-GGAGAGGCTAGTG
AGTTCTGGTGGTGGCGGAGCCATGCTCCTACGACTTAGGGGAGGTCAGAG
ACCTGTGGTTGTAGCAGGG-CAGGCACCTACGACGTAGAGGAGGCCTGGG
ACCTGTAGTTGTGACAGGG-CAGGCGCCTACGACGTAGAGGAGGCCTGGG
ACCTCTGGTGGTGACAGGGTCGGGTGCCTACGGCGTTGGGAAGGCCCGAG
ACCTCTGGTGGTGACAGGGTCGGGTGCCTACGGCGTTGGGAAGGCCCGAG
ACCTCTGGTGGTGACAGGGTCGGGTGCCTACGACGTTGGGAAGGCCCGAG
ACCTCTGGTGGTGACAGGGTCGGGTGCCTACGGCGTTGGGAAGGCCCGAG
GCTTCTGGTCATGACAGGGTCAAGAACCTGAGACAT-GCGAAGGCCAGAG
ACTCGTGGGGATGCCGGGGCCAGGCACCCACGACGT-AGGGAGGTCAGGG
ACTCGTGGGGATGCCGGGGCCAGGCACCCACGACGT-AGGGAGGTCAGGG
ACCTCTCGTGATGACAGGGTCAGGTGCCTAAGACGTAG---AGGTCAGAG
ACCCCTCATAGTCACAGAGCCAGGCGCCTACGACGTAG-GGGGGTCAGAG
ACCCCTCATAGTCACAGAGCCAGGCGCCTACGACGTAG-GGGGGTCAGAG
GCCTCTGGTGGTGACAGGTCCAGGTGCCTACGACTT-GGGAAAGTCAGAG
ACTTCTGGTGGTGACAGGGTCAAGCGCCTACGACACAG-GGAGGCCAGGG
ACCTCTGGTGGTGACAGGGTCATGTGCCTACGACCTTGGGGAGCTGAGAG
ACTTCCGGTCATGAAAGTGCCAAGCACCTATGACATCGGGGAGGTCAGAG
ACCTCTGGCGGTGACGGGGTCAGGCGTCTACGACAT-GGGGAGGTCCGAG
ACCTCTGGCGGTGACGGGGTCAGGCGTCTACGACAT-GGGGAGGTCCGAG
ACTTCCGGTGACGACACGGTCAAGTACCGACGACGT-GGGAAGGCCAGAG
ACTTCCGGTGACGACACGGTCAAGTACCGACGACGT-GGGAAGGCCAGAG
ACTTCCGGTGACGACACGGTCAAGTACCGACGACGT-GGGAAGGCCAGAG
ACTTCTGGTGGTGAAACGGTCAAACACCCACGGCGAAGGGGAGGTCAAAG
---------------------------------------------CAGAA
ATGTTTGCTGGTGAAAGGGTCAAGAATGTACGACATAGTGGATGTCAGAG
ATTGCTGGTGGTGGCAGGGTCGAGCGCCTGCCGCCTAG-GCAGGTGGGTG
ACCTCTGGTGGTGACAGGGTCATGTGCCTACGACCTTGGGGAGCTGAGAG
ACCTCTGGTGGTGACAGGGTCATGTGCCTACGACCTTGGGGAGCTGAGAG
ACCTCTGGTGGTGACAGGGTCATGTGCCTACGACCTTGGGGAGCTGAGAG
ACCTCTGGTGGTGACAGGGTCATGTGCCTACGACCTTGGGGAGCTGAGAG
ACCTCTGGTGGTGACAGGGTCATGTGCCTACGACCTTGGGGAGCTGAGAG
ACCTCTGGTGGTGACAGGGTCATGTGCCTACGACCTTGGGGAGCTGAGAG
GCCTCTGGCGCTGGCCGGGC------------------------------
ACTTCCGGTCATGACAGGAACAAGTACCTACGGAATAG-GGAGCTCAGAG
ACTTGTGGTCGTGACTAGCTCAAGTACCTACTACGCAGCGTAG-TCAGAG
GCATCTGGTGGTGGCAGGGTC-AGCGCCTACGACGT-GGGGAAGTCAGAG
GCATCTGGTGGTGGCAGGGTC-AGCGCCTACGACGT-GGGGAAGTCAGAG
ACTTCTCGCCGTGATAGGGTCAAGTGCCTGCGATGC-G----------GC
ACTTCTGGCGGTGCCGCGGTCAATCGCCTACCACGTAGAGGAGGCCAGAG
ATTGCTGGTGGTGGCAGGGTCGAGCGCCTGCCGCCTAG-GCAGGTGGGTG
ATTGCTGGTGGTGGCAGGGTCGAGCGCCTGCCGCCTAG-GCAGGTGGGTG
ATTGCTGGTGGTGGCAGGGTCGAGCGCCTGCCGCCTAG-GCAGGTGGGTG
ATTGCTGGTGGTGGCAGGGTCGAGCGCCTGCCGCCTAG-GCAGGTGGGTG
GCCTCTGGCGCTGGCCGGG-------------------------------
GCCTCTGGCGCTGGCCGGG-------------------------------
GCCTCTGGCGCTGGCCGGG-------------------------------
GCCTCTGGCGCTGGCCGGG-------------------------------
GCCTCTGGCGCTGGCCGGG-------------------------------
ACCTCTGGTGACGACAGGATCAAGTGCCTAGGACGT-GGGGAGGTTAGAG
GCTTCTGGCCGTGGCAGGGCCAAGTGCCTACGATGT-GGGGAGGTCAGAG
GCTTCTGGCCGTGGCAGGGCCAAGTGCCTACGATGT-GGGGAGGTCAGAG
GCATCTGGTGGTGGCAGGGTC-AGCGCCTACGACGT-GGGGAAGTCAGAG
GCATCTGGTGGTGGCAGGGTC-AGCGCCTACGACGT-GGGGAAGTCAGAG
GCATCTGGTGGTGGCAGGGTC-AGCGCCTACGACGT-GGGGAAGTCAGAG
GCATCTGGTGGTGGCAGGGTC-AGCGCCTACGACGT-GGGGAAGTCAGAG
GCATCTGGTGGTGGCAGGGTC-AGCGCCTACGACGT-GGGGAAGTCAGAG
GCATCTGGTGGTGGCAGGGTCAGGCGCCTACGACGT-GGGGAAGTCAGAG
GCTGCCGGTGGTGACGCGGTCAAGCGCCTACGGTGT-GAGGAGGTCAGAG
GCTGCCGGTGGTGACGCGGTCAAGCGCCTACGGTGT-GAGGAGGTCAGAG
GCTGCCGGTGGTGACGCGGTCAAGCGCCTACGGTGT-GAGGAGGTCAGAG
ACCTCTAGTGGTGCCAAGGTCATGCACCTACGACGTAG-GGTGGGCGGAG
ACTTCTGGCGGTGCCGCGGTCAATCGCCTACCACGTAGAGGAGGCCAGAG
ACTTCTGGCGGTGCCGCGGTCAATCGCCTACCACGTAGAGGAGGCCAGAG
ACCTCTGGTGCTGGCAGGGCCGAGTGCCTGCGACGCAG----TGTCAGGG
ACCTCTGGTGCTGGCAGGGCCGAGTGCCTGCGACGCAG----TGTCAGGG
GCATCTGGTGGTGGCAGGGTC-AGCGCCTACGACGT-GGGGAAGTCAGAG
ACCTCTGGCGGTGACAGGGTCCAGTACCCACGACGT-GGGGAGGTCAGAG
ACCTCTGGTGGTGACAGGGTCCAGTACCCACGACGT-GGGGAGGTCAGAG
ACCTCTGGTTGTGGCGGGGTCGATTGCCTACGACAT-GGGGAGGCCAGAG
CCTTTAGGTGGTGTCAGGGTCGGGCGCCTACGATGC-GGGCATGCCAGAG
ACTTATGGTGGCGAGAGCGCTGGGCACCTACGTCGC-GGGCAGCGGAGAG
ACTTGTGGTCGTGCCAAGGTCAGGTGCGTGCGATCC-GGGGAGGTCAGAG
GCTTCCGCTGGTGACAGCGCCAAGTGTCTGCGACGAAGGGGAGGTGAGTG
--------------------------------------------------
AGTGGAGGCGGTGACAGGGTCAGGAGCCTACGACAT-GGTGAG-TCGGAG
ACTGGAGGCGGTGACAGGGTCAGGAGCCTACGACAT-GGTGAG-TCGGAG
AGTGGAGGCGGTGACAGGGTCAGGAGCCTACGACAT-GGTGAG-TCGGAG
ACTGGAGGCGGTGACAGGGTCAGGAGCCTACGACAT-GGTGAG-TCGGAG
AGCGCTGGTAGTGGCGCGACCCAGTAGCTGCAACGTAGGGAATGCCAGAG
GC--------------GGCGCAAGCATCTACGGCGT-GGGAATGCCAGAG
GCTTCTGGTGGTGACAGGGTCCCGTGCCCACGACGT-GGGGAGGTCCGAG
GCTTCTGGTGGTGACAGGGTCCCGTGCCCACGACGT-GGGGAGGTCCGAG
GCTTCTGGTGGTGACAGGGTCCCGTGCCCACGACGT-GGGGAGGTCCGAG
GCTTCTGGTGGTGACAGGGTCCCGTGCCCACGACGT-GGGGAGGTCCGAG
GCTTCTGGTGGTGACAGGGTCCCGTGCCCACGACGT-GGGGAGGTCCGAG
GCTTCTGGTGGTGACAGGGTCCCGTGCCCACGACGT-GGGGAGGTCCGAG
----------------------------------------GAGGCGAGAG
--------------------------------------------------
ACGTCTCGTGACGACAGAGTCATGCATCCTCGACGCAGGAGAGGTCAGAG
CCCTCTGGGGGTGCCACGGCTAGGTGCCTACGACGTTG---AGGCCAGAG
AGTTCTGGTGGTGTCAGGGTCGGGCGCCTACGATGC-GGGCATGCCAGAG
AGTTCTGGTGGTGTCAGGGTCGGGCGCCTACGATGC-GGGCATGCCAGAG
ACTTGTGGCGCGGACAGGGT-------------------------CCGGG
ACTTGTGGCGCGGACAGGGT-------------------------CCGGG
ACTTGTGGCGCGGACAGGGT-------------------------CCGGG
ACTTCTCACACTGACAGGGT-------------------------GAGGG
ACTTCTCACACTGACAGGGT-------------------------GAGGG
ACTTCTCACACTGACAGGGT-------------------------GAGGG
ACCTCCGGTAGTGACACGATCCAGTACCCGCAACGTAG-GGAAGGCAGTG
ACCTCCGGTAGTGACACGATCCAGTACCCGCAACGTAG-GGAAGGCAGTG
ACTTGTGGTGGTGCCAGGGTCAGGCCCCTACGATTG-GAGTAGGCCAAAG
GCTTCTGTTCATGACAGGTTCAGGCACCTACGCCCTAG-GGAGCTCAGAG
TCCTCTGGTGGTTCCAGGGTCGAGCACCTAGGACGT-G-GTAGGTCCGAG
ACTGCTGGCGGTGACATGGCC-AGCGCCTACGGCGTAG-GGAGATCAGAG
AGTGGAGGCGGTGACAGGGTCAGGAGCCTACGACAT-GGTGAG-TCGGAG
ACCTCTGGTGGTCACGGGGTCAGGCACCTATGAAGT-GGTGTGTTCAGAG
GCTTCTGGTGGTGACAGGGTCCCGTGCCCACGACGT-GGGGAGGTCCGAG
--------------------------------------------------
ACCTCTGGCGGTGACAGGGTCCAGTACCCACGACGT-GGGGAGGTCAGAG
ACCTCTGGTGGTGACAGGGTCAAGCGCCTACGACGTAGGGGTGGCCAGGG
ACCTCTGGTGGTGACAGGGTCAAGCGCCTACGACGTAGGGGTGGCCAGGG
ACCTCTGGTGGTGACAGGGTCAAGCGCCTACGACGTAGGGGTGGCCAGGG
ACGTCTCGTGACGACAGAGTCATGCATCCTTGACGCAGGAGAGGTCAGAG
AGTTCTGGTGGTGTCAGGGTCGGGCGCCTACGATGC-GGGCATGCCAGAG
ACTTGTGGCGCGGACAGGGT-------------------------CCGGG
GCTTCTCGCGCCGACAGGGTTAGGGACCTGTGATGT-GGGGAGGTGAGTG
ACCTCCGGTAGTGGCAAGATCCAGCACCCGCAACGTAG-GGAAGTCAGTG
ACCTCCGGTAGTGGCAAGATCCAGCACCCACAACGTAG-GGAAGTCAGTG
ACCTCCGGTAGTGGCAAGATCCAGCACCCACAACGTAG-GGAAGTCAGTG
ACCTCCGGTAGTGGCAAGATCCAGCACCCGCAACGTAG-GGAAGTCAGTG
ACCTCCGGTAGTGGCAAGATCCAGCACCCACAACGTAG-GGAAGTCAGTG
ACTTCTTGTGATTCGACGGTC--------------------AAGTACGGA
ACTTCTGGTGCTGACAGGGTCACGTGCCTGCGACGT-GGGGAGGTCAGGG
ACTTCTGGTGCTGACAGGGTCACGTGCCTGCGACGT-GGGGAGGTCAGGG
ACTGCTGGCGGTGACATGGCC-AGCGCCTACGGCGTAG-GGAGATCAGAG
ACTGCTGGCGGTGACATGGCC-AGCGCCTACGGCGTAG-GGAGATCAGAG
ACTTCCGGTGGTGGCA-GGTCAAGTTCCTGCGAGGT-GAGGAGGCCGGAG
ACCTCTAGTGGTGATGGGGCCAGGCACTTACGGCGT-GGGGAGGTCAGAG
ACCTCTGGCGGTGACAGGGTCAAGCACCCACGACCC-AGGGAGGCCAGCG
--------------------------------------AAGAGGGCGGTG
ACGTCTGGTGGTGGCGG---------------------------------
ACGTCTGGTGGTGGCGG---------------------------------
ACGTCTGGTGGTGGCGG---------------------------------
ACTTGTGGTGGTGGTAGGGCCAGATGCCTAAAAGGCAG-CGAAGTCGAAG
--------------------------------------------------
ACCTGTGGTAGTGGCGGGGTCAAGCACCTAAGGCTTAGGGGAGGTCGGAG
ACTTGCGGAGGTGACAGGGTCAAGAACCCACAGCTGTGGGGTGGTGAGAG
ACCTCTGGTGCTGACGGGGTCATGTGCCTACGACGTAG-GAAAGCCAGTG
ACTGCTGGTGGTGACAAGGTCAAGTACCCACGACGT-GGGGAGGTCAGAG
ACCTCTGGTGGTGACAAGGTCGAGTGCCTACGGCCT-AGGGAGGCCAGTG
ACTTGGGGTGGTGGCAGGATCAAATGCCCACGACAT-GGTAAAGTCAGAG
ACCTCTGGTGGTGACAGGGTCAAGCACCTATGACCC-GGGGTGGCCGGTG
ACCTGCGGTGGTGGCGGGGTCAAGCACCCGCGACGT-G--GTGGTGAGAA
ACCTGCGGTGGTGGCGGGGTCAAGCACCCGCGACGT-G--GTGGTGAGAG
ACCTGCGGTGGTGGCGGGGTCAAGCACCCGCGACGT-G--GTGGTGAGAG
ACCTGCGGTGGTGACGGGGTCAAGCACCCGCGACGT-G--GTGGTGAGAG
ACCTGCGGTGGTGGCGGGGTCAAGCACCCGCGACGT-G--GTGGTGAGAG
GCTTCTGGTAGTGACAGCGGCAGGTCCCCACGACCTAGGGGAGGTCATTG
ACTTCTGGTGGTGACAGGATCACGAACCTACGACGT-GGCGAAGCTCGAA
GCTTCTGCTGGTGACAGGGCCACGCGCCACCGAGGT-GGAGAGGCCCGTG
ACCACTGGTGCTGACGGGGTCATGTGCCTACGACATAG-GGAAGCCAGTG
ACCTCTGGTGGCGACAGGGCCGAGTGTCTGCAACGT-GGGGAGGTCAGCG
ACCTCTGGTGGCGACAGGGCCGAGTGTCTGCAACGT-GGGGAGGTCAGCG
ACTTGTGGTGGTGGCAGGGTGGAGTGCCTACGACGGAGGGGGGGTCAGCG
ACTTGTGGTGGTGGCAGGGTGGAGTGCCTACGACGGAGGGGGGGTCAGCG
ACTTGTGGTGGTGGCAGGGTGGAGTGCCTACGACGGAGGGGGGGTCAGCG
ACCTCTGGCGGTGACAGGGTCAAGCACCCACGACCC-AGGGAGGCCAGCG
ACCTCTGGCGGTGACAGGGTCAAGCACCCACGACCC-AGGGAGGCCAGCG
ACCTCTGGCGGTGAAAAGGTCAGGCACTTGCAGCGT-GGGAAGGTGAGCG
ACCTCTGGCGGTGAAAAGGTCAGGCACTTGCAGCGT-GGGAAGGTGAGCG
ACCTGTGGCGGTGAAAAGGTCAGGCACTTGCAGCGT-GGGAAGGTGAGCG
ACCTGCGGTGGTGGCGGGGTCAAGCACCCGCGACGT-G--GTGGTGAGAG
ACTTCCGGTAGTTGCAGGGTCAAGCGCCCACAGCGT-G--GGGGTCGAAG
ACTTCCGGTAGTTGCAGGGTCAAGCGCCCACAGCGT-G--GGGGTCGAAG
ACATCTGGCGGTGACAGGGTCGAGCGCCTACGACAC-GGGAAGGTCAGAG
ACCTCTGGTGGGGAAAGGGCCAGCTGCCCACAACACCGGAGAGATTAGAG
ACTTCTCGTGTTGACAGGGTCAGGTACCTATGA-GTAG-TGAAGCCAGCG
ACCTGTGGTAGTGGCGGGGTCAAGCACCTAAGGCTTAGGGGAGGTCGGAG
ACCTCTGGTGGTGACAGGGGCAAGCACCTACGGCCTAGGGGAGGTCAGAG
ACCTCTGGTGGTGACAGGGGCAAGCACCTACGGCCTAGGGGAGGTCAGAG
ACCTCTGGTGGTGACAGGGGCAAGCACCTACGGCCTAGGGGAGGTCAGAG
GCCCCTGGTCCCGACAGGGTCAGGCGCCCAGGACGT-GGGGAGGTCAGTG
GCCCCTGGTCCCGACAGGGTCAGGCGCCCAGGACGT-GGGGAGGTCAGTG
GCCCCTGGTCCCGACAGGGTCAGGCGCCCAGAACGT-GGGGAGGTCAGTG
ACTGATGGTGGCGACAGGGCCCAGCGGCCACGACGT-GGCGAGGTGCGAG
ACTGATGGTGGCGACAGGGCCCAGCGGCCACGACGT-GGCGAGGTGCGAG
ACTGATGGTGGCGACAGGGCCCAGCGGCCACGACGT-GGCGAGGTGCGAG
ACTGATGGTGGCGACAGGGCCCAGCGGCCACGACGT-GGCGAGGTGCGAG
ACTTCTAGTGGTGACAGAGGGAGATGCCTGCGATCTAGGGGAGGTGAG-G
ACCTCTGGTGGTGACAGGGTCAGGTGCCTACGCCACAG-AGTGGTCGGGG
GCTTCTGCTGGTGACAGGGCCACGCGCCACCGAGGT-GGAGAGGCCCGTG
ACCTCTGGTGCTGACGGGGTCATGTGCCTACGACGTAG-GGAAGCCAGTG
ACCTCTGGTGCTGACGGGGTCATGTGCCTACGACGTAG-GGAAGCCAGTG
ACCTCTGGTGCTGACGGGGTCATGTGCCTACGACGTAG-GGAAGCCAGTG
ACCTCTGGTGCTGACGGGGTCATGTGCCTACGACGTAG-GGAAGCCAGTG
ACCTCTGGTGCTGACGGGGTCATGTGCCTACGACGTAG-GGAAGCCAGTG
ACTTCTGGTGCGGACAGGGTCAAGCACCCACGACGTAGCGGCGGTCGGAG
ACTTCTGGTGCGGACAGGGTCAAGCACCCACGACGTAGCGGCGGTCGGAG
ACTTCTGGTGCGGACAGGGTCAAGCACCCACGACGTAGCGGCGGTCGGAG
ACTTCTGGTGCGGACAGGGTCAAGCACCCACGACGTAGCGGCGGTCGGAG
ACCGCACACGGTGGCAGGGCCAGGCGCCTACAACGTAGGGGAGGTTGGAG
---------------------------CTACG-CGTAGAAGAGGTCAGAG
---------------------------CGACG-CGTAGAAGAGGTCAGAG
---------------------------CGACG-CGTAGAAGAGGTCAGAG
---------------------------CGACG-CGTAGAAGAGGTCAGAG
---------------------------CGACG-CGTAGAAGAGGTCAGAG
ACATCTGGTAGTGGCACTGTCAAGCACCTATAGCGTAG-TGAGGTCAGTG
ACATCTGGTAGTGGCACTGTCAAGCACCTATAGCGTAG-TGAGGTCAGTG
ACCTCTGTTGGTGACAGGGTCATGCGCCTACGACGTAGACGAGGTCGGAG
GCTTCTCGTGCTGACAGAGC------------------------------
GCATGTCGTGGTGGCAGGGTCCAGCACCTGCAACGT-GGGGAAGTCAGAG
ACGTCTGATGGCGACA----------------------------------
GCACGCGGTGGTGACAGGCTCAAGTACCCACGACGT-GCGGATGTGGGAG
GCACGCGGTGGTGACAGGCTCAAGTACCCACGACGT-GCGGATGTGGGAG
GCACGCGGTGGTGACAGGCTCAAGTACCCACGACGT-GCGGATGTGGGAG
ACCGGT-GTTGCGACAGGGTCGAGGACCAAAGACGT-GGGGAGATCAGAG
ACGTCTGATGGCGACA----------------------------------
ACCTCTGGTGGTGGCAAGGTCGAGTGTCCTCGAGCTAG-CGAGGTCAGTG
ACCTCTGGTGATGACAGGGTCCAGTATCTGCGACGT-GGGGAGGTCAGAG
ACCTCTGGTGGTGACAGGGTCCAGTATCTGCGACGT-GGGGAGGTCAGAG
CTTTCAAGTGGTGACCGGC-------------------------------
CTTTCAAGTGGTGACCGGC-------------------------------
ACCTCTGGTGGTGACGGGGTCCACAGCCTACGGCAT-GGGGACCTCAGAG
GCCTCCGGTGGTGGCCGAGTCCAGCGCCTACGGCGTAGCGGAG-CCAGAG
GCCTCCGGTGGTGGCCGAGTCCAGCGCCTACGGCGTAGCGGAG-CCAGAG
GCCTCCGGTGGTGGCCGAGTCCAGCGCCTACGGCGTAGCGGAG-CCAGAG
GCCTCCGGTGGTGGCCGAGTCCAGCGCCGACGACGTAGCGGAG-CCAGAG
GCCTCCGGTGGTGGCCGAGTCCAGCGCCGACGGCGTAGCGGAG-CCAGAG
GCCTCCGGTGGTGGCCGAGTCCAGCGCCTACGGCGTAGCGGAG-CCAGAG
ACATCTGGTAGTGGCACTGTCAAGCACCTATAGCGTAG-TGAGGTCAGTG
GCTGCTGGCATTCAAAGAATCAAACTCCTACGATGCAG-GGAGGTCAGGG
ACCGCTGGTGGTAACAGAGTCAAGCATCTACGACGTAGGGTAGGTCAGCG
AGCTCTGGTGGCTATAGGCTCGTGCACCACCGACGG-GGAAAGGTCAGAG
ACATCTGGTGGCTATAGGCTCGTGCACCACCGACGG-GGAAAGGTCAGAG
ATCCCTGTTGGTGACAGGGTCATGCGCCTACGACGT-G---AGGTCAGAG
ATCCCTGTTGGTGACAGGGTCATGCGCCTACGACGT-G---AGGTCAGAG
ACCTCTTGTGGTGAAAG---------------------------------
--------------------------------------------------
ACCTCAGCGTGTGACCGGGTCACGTGCGTACGACGCAG-GGAAGTCCGAG
ACTTCTTGTGGTGGCAGGTTCAAGCACCTACGGCGTAGGGGTGGACAGAG
ACTCCTAGCCGTGATAAAGTCAAGCACCTACGACGT-ACAGAGGTCAGAG
GCCTTTGCTGGCAACAGGGTCACGTGCCCGCAACGGAG--GGGGTCAAGG
ACGTCTGGTGATGACAGGGTCAGGCGCCTAAGACGT-GCGGAGTTCAGAG
GCCTGTGGTGGTGACAGGGTC-AGTACCGATGGCGT-G--GGGGTCAGAG
ACATCTGGTGGTGACAGGGTC-AGTGCCGGCGACGC-GGGGAGGCCAGAG
TCCTGTGGTGCTGACAGGGTC-ATTACCTTCGACCT-GGGTAAGTCAGCG
GCACGCGGTGGTGACAGGCTCAAGTACCCACGACGT-GCGGATGTGGGAG
GCACGCGGTGGTGACAGGCTCAAGTACCCACGACGT-GCGGATGTGGGAG
ACTCCTGGTGGTGACAGGGGCAAGCATCTACAACCT-A---AGGTCAGAG
ACCGTTGGTGGTGCCAGGGTCAAGCACCAGTGTCGT-G---GGGTCACAG
ACCTCTGGTGGTGACAAGGTCATACTTCTACGACGTAGGGGATGTCAGAG
ACCTCTGGTGGTGACAAGGTCATACTTCTACGACGTAGGGGATGTCAGAG
ACCTCTGGTGGTGACAGGCTCATGCACCTACGGCGCAGGGGAGTTCAGAG
ACTTCTCGTGGTGAAAGGGCCAAGCACCTACGGCGA-GGGGAAGTCAGTG
ACTTCTCGTGGTGAAGGGGCCAAGCACCTACGGCGA-GGGGAAGTCAGTG
ACTTCTCGTGGTGAAAGGGCCAAGCACCTACGGCGA-GGGGAAGTCAGTG
ACTTCTGGTGGTGACAGGGTCAGGCACCTACGCTGT-GGGAAAGTGAGAG
ACTTCTGGTGGTGACAGGGTCAGGTACCTACGCCGT-GGGAAAGTGAGAG
GCTTCACGTGGTGACAGGGTC-----------------------------
ACTTCTGACGGTGAGACGGTGAAGCACCTACGAGGCAG---GGGTCGCGG
ACTTCTGGCGGTGAGACGGTGAAGCACCTACGAGGCAG---GGGTCGCGG
ACCTCTGGTGGTGACAGGGCCAAGCACCCGCGACGCAG-GGAGGTCAGAG
ACTTCTGGTGGTGACAGGGCCAAGCACCCGCGACGCAG-GGAGGTCAGAG
--------------------------------------------------
CCTCGTGTTGGTGGCAGGGTCGT---------------------------

CGATGTCGCGCTGCTGGTGTCCGCGGTGAGGTCCTGGGCGGTGCTGCGTC
--AATTATCGCTGCGGTTGTCCGCGGTCAGGCCCTGGATGGCGCTGCGTC
CCATGCGCCGCTGCTGATGTCGGCGGCCGTGCCGTGGATGGCGCTGCGTC
CGATTCACTGCTGCCGATGCCGGCGGTCAGGTTCTGGACGGCGTTGAACC
--ACTTCTCGCTACCGATGCCTGCGGTCAGGCCCTGGATGGCGGTGCGTC
CGATGCATCGCTGCTGATGCTGGTGGTCAGGTTGTGGGCGGCGCTGCGTC
------------------------GGTCAGGTCGTGGACGGCG-TGGGCC
CGATGCACCGCTACGGATGTCGGCGGTCAGGTCCTGGATGAGGTGGCGTC
CGATGTGTCGCTGCTGATGACGGGGGTCAAGTCCTGGGTGACGTGGCGTT
CGATGCACCGCTGCTGATGCTGGCGGTGTGGGCCTGGATGGCGCAGGGGT
CAACGCACCTCTACCGATGCCAGCGGTGAGGCCGCGGATGGCGTTGCGCG
AGACTCCGCGCTACTCATGTCGGCGGTCCGGTGGTGGACGGCGTTGCACC
-----------------------------------CCAACGCGATCCATC
CGATGTGTCGCTGCTGGTGTCGGCGGTGAGGTCCTGGACGGCGTGGCGTC
TGACTCAGCGCTGCCGATGTCGGCGGTGAGGTCCCGGATGGCGCCGCGTC
CGATGCAGCGCCACTGAGGTTGGTGGTGAGGCCGTGGATGGCGTTGCGTT
CGATGCATCGCTGCTGATGCCGGCGGCCAGGTCCT---------------
CGACGTAGCGCCGCGGATGCCGGCGGCC-TGTCGTGCATGGCGCTGCGTC
CGACGTAGCGCCGCGGATGCCGGCGGCC-TGTCGTGCATGGCGCTGCGTC
CGACGTAGCGCCGCGGATGCCGGCGGCC-TGTCGTGCATGGCGCTGCGTC
CGACGTAGCGCTGCGGATGCCGGCGGCC-TGTCGTGCATGGCGCTGCGTC
CGAGTTAGGGCTACGGACGTCAGCGGCCATGTCGTGCATGGCGTTGCGTC
CGAGTTAGGGCCACGGACGTCAGCGGCCATGTCGTGCATGGCGTTGCGTC
CGAGTTAGGGCTACGGACGTCAGCGGCCATGTCGTGCATGGCGTTGCGTC
CGAGTTAGGGCCACGGACGTCAGCGGCCATGTCGTGCATGGCGCTGTGCC
CGATCCATCGCAGCAGATGCCGGCGGT-----------------------
CTGGTTGTCGCTGCGGGTGTCGGCGGTCGGGTCCTGAATGGTGCTGCGTC
CTGGTTGTCGCTCCGGGTGTCGGCGGTCGGGTCCTGAATGGTGCTGCGTC
CGACGTATCGCTACGGGTGTCGGCGGTCAGGCCCTGGATAGCATTGCGCC
CGACGTATCGCTACGGGTGTCGGCGGTCAGGCCCTGGATAGCATTGCGCC
GGAAGCGTCGCCACGGAGGTCGGCGGCTAGGCCCTGGATGGCGTGGCGTC
--------------GGAGGGGGG-GGTGATGTCCCGGGCGGCGCTGCGTC
CGCTGCATCGCTACGGATGTCGGCGGTGATGTCCCGGGCGGCGCCGCGTC
TGATTCATCGTTACTCGTGTCTGCAGTCGGGTCCTGGACGGCTTTGCGTT
CGGTGCACCGCTCCCCATGTCGGCGCTCAAGCGCTGGACGGCGCTGCGTC
CGGTGCACCGCTCCCCATGTCGGCGCTCAAGCGCTGGACGGCGCTGCGTC
--------------------------------------------------
CA------------------------------------------------
CA------------------------------------------------
CA------------------------------------------------
CA------------------------------------------------
-----------------------------GGTCGTGGATGGCGCTGCGCC
CGACGTACCGCTGCCGATGTCGGCGGTCAGGTCGTGGATGGCGCTGCGTC
CGACGTACCGCTGCCGATGTCGGCGGTCAGGTCGTGGATGGCGCTGCGTC
---CGTACCGCTGCCGATGTCGGCGGTCAGGTCGTGGATGGCGCTGCGTC
CGATGTGCCGCTGGTGGTGTCGGCGGTCAGGTCCTGGACGGCGCTGCGTC
CGATGTGCCGCTGGTGGTGTCGGCGGTCAGGTCCTGGACGGCGCTGCGTC
-----------------------------------GGACGGCGCTGCGTC
---TGCATCGCTGCCGATGTCGGCAGTCAGGTCCC-GACGGCGCTGCGTC
---TGCATCGCTGCCGATGTCGGCAGTCAGGTCCC-GACGGCGCTGCGTC
CTGTCTGCCGCTGCTGATGGCGACGGTCAGGTCGCATATAGCGCTGCCTC
CTGTCTGCCGCTGCTGATGGCGACGGTCAGGTCGCATATAGCGCTGCCTC
CTGTCTGCCGCTGCTGATGGCGACGGTCAGGTCGCATATAGCGCTGCCTC
---------GCCGCTGGTGGTGACGGGCAGGCCTTGGACGGTGCTGCGTC
CGATGTACCTGTACGGCTGTCGGCTGTCAGGTCCTGGGTGGCGTTGTATT
CGACGTACGGTGACTAATGCCAGAGGTCAGGGCCTGGATGGCATGGCGGC
CGATGTGCCGCTGGTGGTGTCGGCGGTCAGGTCCTGGACGGCGCTGCGTC
CGATGTATCGCTGCTGATGTCGGCGGTCAGGCCGTGGACGGCGCTGCGCA
CGATGTATCGCTGCTGATGTCGGCGGTCAGGCCGTGGACGGCGCTGCGCA
CGATGCATCGGTGCTGATGTCGGCGGCGAGGGCCTGGGTGGCGTTGCATC
CAATGTATCGCTACGGGCGTCAGCCGTCACGGCCCGGATAGCGCGGCGTC
CGGTGTGGCGCTACGCATGTCGGCCATCCGATCCTGGATGGCGTTGCGCC
CGGTGTGGCGCTACGCATGTCGGCCATCCGATCCTGGATGGCGTTGCGCC
CGGTGTGGCGCTACGCATGTCGGCCATCCGATCCTGGATGGCGTTGCGCC
TGATGTGTCGCCACGGATGTCAGCGGTCGGGTCCCGCATGGCGCTGTGTC
TGATGTGTCGCCACGGATGTCAGCGGTCGGGTCCCGCATGGCGCTGTGTC
CGATGCATCGGTGCTGATGTCGGCGGCGAGGGCCTGGGTGGCGTTGCATC
CGATGCATCGGTGCTGATGTCGGCGGCGAGGGCCTGGGTGGCGTTGCATC
CGATGCATCGGTGCTGATGTCGGCGGCGAGGGCCTGGGTGGCGTTGCATC
---TGTGGCGCTACGCATGTCGGC--CCCGATCCTGGATGGCGTTGCGCC
CGATGTAGCGCTA-TGATGTCGGCGGTCAGATCGTGCATGGCGTAGTATC
CGGTTCAGTGCAACTGATGTCGGCCGCCAGGTACCGGATGGCGTTGCATC
CGATGTATCGCCACTAATGCAGGC-GCCAGATGGTGGATAGTGTTGCGTT
CGGGCCATCGCTGCGGATGTCGGCGGCGGG-TCCTGGGCGACGTGGCGTC
CGATG---CGCCGCTGGTGTCGGCGG-GGGGTTCTTGGCGGCGTGGCGTT
CGAGGCATCGCTACCGATGTCGACGGCCAGGACCTGGATGACATTGCTTC
CGATGTACCGCTGCTTGTGCCAGCGGTTAGACCCTGGACGGCGTGGCGTC
CGATGTACCGCTGCTTGTGCCAGCGGTTAGACCCTGGACGGCGTGGCGTC
--ATGTACCGCTGCTTGTGCCAGCGGTTAGACCCTGGACGGCGTGGCGTC
CGATGTACCGCTGCTTGTGCCAGCGGTTAGACCCTGGACGGCGTGGCGTC
--ATGTACCGCTGCTTGTGCCAGCGGTTAGACCCTGGACGGCGTGGCGTC
CGATGTACCGCTGCTTGTGCCAGCGGTTAGACCCTGGACGGCGTGGCGTC
CGGGCCATCGCTGCGGATGTCGGCGGGCGGGTCCTGGGCGGCGTGGCGTC
CG-------------------------------------GGCGCTGTGCC
CGGGCCATCGCTGCGGATGTCGGCGGGCGGGTCCTGGGCGGCGTGGCGTC
CGGGCCATCGCTGCGGATGTCGGCGGGCGGGTCCTGGGCGGCGTGGCGTC
CG-------------------------------------GGCGCTGT-CC
CGGGCCATCGCTGCGGATGTCGGCGGGCGGGTCCTGAGCGGCGTGGCGTC
CGGGCCATCGCTG-TGATGTCGGCGGGCGGGTCCTGGGCGGCGTGGCGTC
CGATGTGCCGCTGCTGATGCCGGCGGTCAGGTCGTGGATGGCGCTGCATG
CGGGCCATCGCTGCGGATGTCGGCGGGCGGGTCCTGGGCGGCGTGGCGTC
CGATGGTTCGCCGCGGGTGTTGACGGTCAGGTCCTGGATGGCGCTGCATC
CGATGGTTCGCCGCGGGTGTTGACGGTCAGGTCCTGGATGGCGCTGCATC
CGACTCATCGCTGCTGATGTCGGCAGTCGCGTCCCGGATGGCGCGGCGTC
CGGTTTACTGCCACTGATGCCGGCGGCGGGGTTCTGGATGGCGCTGCCTC
CGGTTTACTGCCACTGATGCCGGCGGCGGGGTTCTGGATGGCGCTGCCTC
CGGTTTACTGCCACTGATGCCGGCGGCGGGGTTCTGGATGGCGCTGCCTC
CAGTTTACTGCCACTGATGCCGGCGGCGGGGTTCTGGATGGCGCTGCCTC
CGATGTGTCGCTGCTGATGCCGGCGGTGAGCTCCTTGATGGCGCTGCGCC
CGATGTGTCGCTGCTGATGCCGGCGGTGAGCTCCTTGATGGCGCTGCGCC
CGATGTGTCGCTGCTGATGCCGGCGGTGAGCTCCTTGATGGCGCTGCGCC
CGATGTGTCGCTGCTGATGCCGGCGGTGAGCTCCTTGATGGCGCTGCGCC
CAGTTTACTGCCACTGATGCCGGCGGCGGGGTTCTGGATGGCGCTGCCTC
CGGTTTACTGCCACTGATGCCGGCGGCGGGGTTCTGGATGGCGCTGCCTC
-------------------------------------------CTG-TCA
--------------------------TGAGGCCCTGGACAGCGCTGCGTC
--------------------------TGAGGCCCTGGACAGCGCTGCGTC
--------------------------------------------------
--------------------------------------------------
--------------------------------------------------
CGGTTCCACACGACAGATGTCAGCGTCCAGGTCCTGGATGGTGTTGCATC
-----------------------------------GGATGGCGGTGCGTC
-----------------------------------GGATGGCGGTGCGTC
-----------------------------------GGATGGCGGTGCGTC
-----------------------------------GGATGGCGGTGCGTC
----------------------------------------------CGTC
----------------------------------------------CGTC
----------------------------------------------CGTC
--------------------------------------------------
---------------------------CAGGTCCCGGATCGCGTTGCGTC
--------------------------------------------------
CGACGTATCCCTACCACTCTCAGTAGCCACGTCCTGGATGGCGTTCTCTC
CGATGCGTGGCTGCTGGTGTCAGCGGCCAGGTCTTGGGCGGCGTGGCATC
-----CATCGCTGCTGATGTCGGCAGTGAGGTCCTGGGTGGCGTGGCGTC
-----CATCGCTGCTGATGTCGGCAGTGAGGTCCTGGGTGGCGTGGCGTC
CGGTGCACCGCTACCGGTGTCGGCGCTCATGTCCCGGACATGGTGGCGGC
CGGTGCACCGCTACCGGTGTCGGCGCTCATGTCCCGGACATGGTGGCGGC
----------------GTGCCAGTGCCGAGTGCCTGGACTTGGGGAGGCC
--AGTCATCGATG-TGATGCTCGCGGTCACACCCTGGATGGTGCTTCATC
CGGTGCACCGCTACCGGTGTCGGCGCTCATGTCCCGGACATGGTGGCGGC
CGGTGCACCGCTACCGGTGTCGGCGCTCATGTCCCGGACATGGTGGCGGC
CGGTGCACCGCTACCGGTGTCGGCGCTCATGTCCCGGACATGGTGGCGGC
CGATGCATGGCTGCTGATGTCGGCGGTGGGGTGGTGGATGGCGTTGCGTT
CGATGCATGGCTGCTGATGTCGGCGGTGGGGTGGTGGATGGCGTTGCGTT
CGATGCGTGGCTGCTGGTGTCAGCGGCCAGGTCTTGGGCGGCGTGGCATC
CGATGCATGGCTGCTGATGTCGGCGGTGGGGTAGTGGATGGCGTTGCGTT
CGATGCATGGCTGCTGATGTCGGCGGTGGGGTGGTGGATGGCGTTGCGTT
CGATGCATGGCTGCTGATGTCGGCGGTGGGGTGGTGGATGGCGTTGCGTT
CGATGCATGGCTGCTGATGTCGGCGGTGGGGTGGTGGATGGCGTTGCGTT
CGATGCATGGCTGCTGATGTCGGCGGTGGGGTGGTGGATGGCGTTGCGTT
CGATGCATGGCTGCTGATGTCGGCGGTGGGGTGGTGGATGGCGTTGCGTT
CGATGCATGGCTGCTGATGTCGGCGGTGGGGTGGTGGATGGCGTTGCGTT
CGATGTATCGCTGCTGGTGTGGGCGGTCAGGACCTGGATGGCGTTGCTTT
CGATGTATCGCTGCTGGTGTGGGCGGTCAGGACCTGGATGGCGTTGCTTT
CGATGTATCGCTGCTGGTGTGGGCGGTCAGGACCTGGATGGCGTTGCTTT
CGATGTATCGCTGCTGGTGTGGGCGGTCAGGACCTGGATGGCGTTGCTTT
CGAGGTATCGCTGCTGATGTCCGCGGTCAGGTCCTGGATGGCGTTACGTC
CGATGGATCGCTGCTGACGTCTGCGGCCAGCTCCTGGACGGTGTGGCGTC
CGATGGATCGCTGCTGACGTCTGCGGCCAGCTCCTGGACGGTGTGGCGTC
CAACGCACGGCGACTGATGTCGGCGGTCATGTCCTGAATAGTGTTGCGCT
CGATGTATCGCTGCGGATGTTGGCGGTCGGGCCCTGGATGGCGCTGTGTC
CGATGTATCGCTGCGGATGTTGGCGGTCGGGCCCTGGATGGCGCTGCGTC
CGATGTATCGCTGCGGATGTTGGCGGTCGGGCCCTGGATGGCGCTGCGTC
CGATGTATTGCTGCGGATGTTGGCGGTCGGGCCCTGGATGGCGCTGCGTC
CGATGTATCGCTGCGGATGTTGGCGGTCGGGCCCTGGATGGCGCTGCGTC
ATACTGATTGCTGCTGATGTCGGCGGCCAGGCCCTGGATGGCGTGGCGTC
ATACTGATTGCTGCTGATGTCGGCGGCCAGGCCCTGGATGGCGTGGCGTC
--------------------------------------------------
--------------------------------------------------
--------------------------------------------------
--------------------------------------------------
--------------------------------------------------
CGGTGCGTCGCCACCGGTGTGGGCAGTGAGGTCGTGGATGGCGCGGCGCC
AGACGTATCGCTACAGATGCCAACAGGGAGGCCCTGGATGGCGTGGCGTC
CGATGCATCGCTACTGATGTCGGCGGTTAGGGCTTGGATGGCG-------
CGATGCATCGCTACTGATGTCGGCGGTTAGGGCTTGGATGGCG-------
CCGTTTAGCGCTGCGGATATCGGCGGTCAGGCCCTGGATGGCGTGGCGTC
CCGTTTAGCGCTGCGGATATCGGCGGTCAGGCCCTGGATGGCGTGGCGTC
CGATGCATCGCTACTGATGTCGGCGGTTAGGGCTTGGATGGCGGGGCGTT
CGATGCATCGCTACTGATGTCGGCGGTTAGGGCTTGGATGGCGGGGCGTT
CAATGTATTGTTGCCGATGCAAGTGGTCCTGCCCTGGCGTAGGCTTCATC
CAATGTGTCGCTGCTGATTTCGGCGGCCAGGTCCTGGCTGGCGCTGCGTG
CGA-CTGCCGCCGCAGATGTAGGCGTTCATGTCGTGAATGGCGTTTCGTT
CGGTGCATCGCCACCGGTGTGGGCAGTGAGGTCGTGGATGGCGCGGCGCC
CGGTGCGTCGCCACCGGTGTGGGCAGTGAGGTCGTGGATGGCGCGGCGCC
CGGTGCGTCGCCACCGGTGTGGGCAGTGAGGTCGTGGATGGCGCGGCGCC
CGGTGCGTCGCCACCGGTGTGGGCAGTGAGGTCGTGGATGGCGCGGCGCC
CGGTGCGTCGCCACCGGTGTGGGCAGTGAGGTCGTGGATGGCGCGGCGCC
CGGTGCGTCGCCACCGGTGTGGGCAGTGAGGTCGTGGATGGCGCGGCGCC
CGGTGCGTCGCCACCGGTGTGGGCAGTGAGGTCGTGGATGGCGCGGCGCC
CGATGCATCGCTGATGATGTCGGCGGCCAGGTCCTGGCTGGCGCTGCGCG
CAATGTATCGCTACTGATGGCGGCGGTGAGGCCCTGGATGGCGTGGCGCC
GGACTCATTGCGACTCATGGCGGCGGCGAGGTCGTGGATGGTGATGCGCC
GGACTCATTGCGACTCATGGCGGCGGCGAGGTCGTGGATGGTGATGCGCC
GGACTCATTGCGACTCATGGCGGCGGCGAGGTCGTGGATGGTGATGCGCC
CGATGCATCGCTG-TGATGGCGGCGGTGAGGCCCTGGATGGCGTGGCGTC
CGATGCATCGCCGCTGATGCCGGCAGTCAGGTTCTGGAGGGCGTTGCGTC
CGATGCATCGCCGCTGATGCCGGCAGTCAGGTTCTGGAGGGCGTTGCGTC
CGATGTATCGCTGCTGATGTCGGCGGTGAAGTCCTGGATGATGTTGCGTC
CAATGTATCGCTACTGATGGCGGCGGTGAGGCCCTGGATGGCGTGGCGCC
CGATGCATCGCCGCTGATGCCGGCAGTCAGGTTCTGGAGGGCGTTGCGTC
CGATGCATCGCCGCTGATGCTGGCAGTCAGGTTCTGGAGGGCGTTGCGTC
CGATGCATCGCCGCTGATGCCGGCAGTCAGGTTCTGGAGGGCGTTGCGTC
CGATGCATCGCCGCTGATGCCGGCAGTCAGGTTCTGGAGGGCGTTGCGTC
CGATGCATCGCCGCTGATGCTGGCAGTCAGGTTCTGGAGGGCGTTGCGTC
CGATTGGTCGCTGCTGATGCTGGCGGCCGGGCTCTGGATGGGGTTGCGTC
TGACTCAGCGCTGCCGATGTCGGCGGTGAGGTCCCGGATGGCGCCGCGTC
CGATGCAGCGCCACTGAGGCTGGCGGTGAGGCCGTGGATGGCGTTGCGTT
CGATGCAGCGCCACTGAGGCTGGCGGTGAGGCCGTGGATGGCGTTGCGTT
CGATGCAGCGCCACTGAGGCTGGCGGTGAGGCCGTGGATGGCGTTGCGTT
CGATGCAGCGCCACTGAGGCTGGCGGTGAGGCCGTGGATGGCGTTGCGTT
TGACTCAGCGCTGCCGATGTCGGCGGTGAGGTCCCGGATGGCGCCGCGTC
CGGTTTATCGCTGCCGATGTCGGCGGTGAGGTCCTGGCTGGCGCCGCGTC
CGATTCACCGAGACTCATGTCCACGGTGAGGACCTGGACGGCGTAGCCTA
CGCGCTTGCGCCA-TCATATGGTAGGTGAGCGTCA---------------
CGCGCTTGCGCCA-TCATATGGTAGGTGAGCGTCA---------------
------------------------GGGGAGGTCCTGGACGGCGCTGCGTC
-------------------------GTCAGGTCCTGGACGGCGCGGCGCC
------------------------GGGGAGGTCCTGGACGGCGCTGCGTC
------------------------GGGGAGGTCCTGGACGGTGCTGCGTC
-------------------------GTCAGGTCCTGGACGGCGCGGCGCC
-------------------------GTCAGGTCCTGGACGGCGCGGCGCC
-------------------------GTCAGGTCCTGGACGGCGCTGCGTC
-------------------------GTCAGGTCCTGGACGGCGCTGCGTC
TGACTCAGCGCTGCCGATGTCGGCGGTGAGGTCCCGGATGGCGCCGCGTC
TGACTCAGCGCTGCCGATGTCGGCGGTGAGGTCCCGGATGGCGCCGCGTC
CGATGTAACGCCGCTGATGCCGGCGGTCAGGCGCTGGACGGCGTGGCATC
CGATGTAACGCCGCTGATGCCGGCGGTCATGCGCTGGACGGCGTGGCATC
CGATGTAACGCCGCTGATGCCGGCGGTCAGGCGCTGGACGGCGTGGCATC
CGATGTAACGCCGCTGATGCCGGCGGTCAGGCGCTGGACGGCGTGGCATC
CGATGTAACGCCGCTGATGCCGGCGGTCAGGCGCTGGACGGCGTGGCATC
CGATGTAACGCCGCTGATGCCGGCGGTCATGCGCTGGACGGCGTGGCATC
CGATGTAACGCCGCTGATGCCGGCGGTCGGGCGCTGGACGGCGTGGCATC
CGCCCCATCGCTACGGATGTCGGCGGTGAGGTCCTGCACGGTGCTGCGTC
CGCCCCATCGCTACGGATGTCGGCGGTGAGGTCCTGCACGGTGCTGCGTC
CGATGCATCGCTGCTGAT--CGGCGGCGCGGTCCCGGCTAGCGTTTCGTC
CGCCCCATCGCTACGGATGTCGGCGGTGAGGTCCTGCACGGTGCTGCGTC
CAAGATGTCGCTGCGGATGTCGGCCGTCAGGTGCCGGATGGCGTGGCGCC
CAAGATGTCGCTGCGGATGTCGGCCGTCAGGTGCCGGATGGCGTGGCGCC
CGATGCATCGCTGCTGCTGTCCGCGGTCCGGTCGTGGATGGCGTTGTGTC
CGATGCATCGCTGCTGCTGTCCGCGGTCCGGTCGTGGATGGCGTTGTGTC
CGATGCATCGCTGCTGCTGTCCGCGGTCCGGTCGTGGATGGCGTTGTGTC
CAACGTATTCCTGCTGATGTCGGCGGCCGGGCCCTGGAGGACGCTGCCGG
CGATGCATCGCTGCTGCTGTCCGCGGTCCGGTCGTGGATGGCGTTGTGTC
CAACGGATCGCTACAGATGTCGGTGGTCAGCACCTGGCCTGCGTGGCGTT
CAACGAATCGCTACAGATGTCGGTGGTCAGCTCCTGGCCTGCGTGGCGTT
CAACGAATCGCTACAGATGTCGGTGGTCAGCTCCTGGCCTGCGTGGCGTT
CAACGGATCGCTACAGATGTCGGTGGTCAGGTCCTGGCCTGCGTGGCGTT
CAACGGATCGCTACAGATGTCGGTGGTCAGGTCCTGGCCTGCGTGGCGTT
CGACCTATCGCTACTGATGTCGGCCGTCAGATCCTGGATGGGGTTGCGTC
CGACCTATCGCTACTGATGTCGGCCGTCAGATCCTGGATGGGGTTGCGTC
CGACCTATCGCTACTGATGTCGGCCGTCAGATCCTGGATGGGGTTGCGTC
CGATGCATCGCTGCTGCTGTCCGCGGTCCGGTCGTGGATGGCGTTGTGTC
CGACCTATCGCTACTGATGTCGGCCGTCAGATCCTGGATGGGGTTGCGTC
CGATGCACGGCGACTGATGCCGGCGGTCAGGTCGTGGATGGCGCGGCGTC
CGATGCACGGCGACTGATGCCGGCGGTCAGGTCGTGGATGGCGCGGCGTC
CGATGCACGGCGACTGATGCCGGCGGTCAGGTCGTGGATGGCGCGGCGTC
CGATGCACGGCGACTGATGCCGGCGGTCAGGTCGTGGATGGCGCGGCGTC
CGATGCACGGCGACTGATGCCGGCGGTCAGGTCGTGGATGGCGCGGCGTC
-----------------------------------GGGCGCTGTGCCGTC
-----------------------------------GGGCGCTGTGCCGTC
-----------------------------------GGGCGCTGTGCCGTC
-----------------------------------GGGCGCTGTGCCGTC
-----------------------------------GGGCGCTGTGCCGTC
CGTCTCATCGCCACCGATGCCGACGGCCGCACCCTCGACGGCGTGGCGTC
CGATGCACGGCGACTGATGCCGGCGGTCAGGTCGTGGATGGCGCGGCGTC
CGTCTCATCGCCACCGATGCCGACGGCCGCACCCTCGACGGCGTGGCGTC
CGTCTCATCGCCACCGATGCCGACGGCCGCACCCTCGACGGCGTGGCGTC
CGTCTCATCGCCACCGATGCCGACGGCCGCACCCTCGACGGCGTGGCGTC
CGTCTCATCGCCACCGATGCCGACGGCCGCACCCTCGACGGCGTGGCGTC
CGTCTCATCGCCACCGATGCCGACGGCCGCACCCTCGACGGCGTGGCGTC
CGTCTCATCGCCACCGATGCCGACGGCCGCACCCTCGACGGCGTGGCGTC
CGTCTCATCGCCACCGATGCCGACGGCCGCACCCTCGACGGCGTGGCGTC
CGTCTCATCGCCACCGATGCCGACGGCCGCACCCTCGACGGCGTGGCGTC
CGTCTCATCGCCACCGATGCCGACGGCCGCACCCTCGACGGCGTGGCGTC
CGACACATGGCTACTCGTGTCGGCGGTCAGGTAGTGGATGGCATGGCGTC
CGATGCACGGCGACTGATGCCGGCGGTCAGGTCGTGGATGGCGCGGCGTC
--------------------------------------------------
CGCTG---------------------------------------------
CGCTG---------------------------------------------
CGATGCATCCCTGCTGACGCCGGCAGCCGTGTCCTGGACGGCGTGGCGTC
CGATACATCGCTGCGGT-GTCGGCATCGATGTCGTGGACGGCGTTGCGTC
CGATGCATCCCTGCTGACGCCGGCAGCCGTATCCTGGACGGCGTGGCGTC
CGATGCATCCCTGCTGACGCCGGCGGCCGTGTCCTGGACGGCGTGGCGTC
CGATGCATCCCTGCTGACGCCGGCGGCCGTGTCCTGGACGGCGTGGCGTC
CGATGCATCCCTGCTGACGCCGGCAGCCGTGTCCTGGACGGCGTGGCGTC
CGATGCATCCCTGCTGACGCCGGCAGCCGTGTCCTGGACGGCGTGGCGTC
CGATGCATCCCTGCTGACGCCGGCGGCCGTGTCCTGGACGGCGTGGCGTC
CTATGCATCGCTGCTGATGCCGGCGGCCAGGTCGTGGATGGCGTTGCTGT
CTATGCATCGCTGCTGATGCCGGCGGCCAGGTCGTGGATGGCGTTGCTGT
CGCTTCATCGCTGTTGATGTCGGCGGTGATGTCCAGGATGGCGCCGTGCC
CGCTTCATCGCTGTTGATGTCGGCGGTGATGTCCAGGATGGCGCCGTGCC
CGCTGCATCGCTCCTGATGTCGGCGGCCAGGTCGTGGATGGCGTGGTGTC
CGCTGCATCGCTCCTGATGTCGGCGGCCAGGTCGTGGATGGCGTGGTGTC
CGCTGCATCGCTCCTGATGTCGGCGGCCAGGTCGTGGATGGCGTGGTGTC
CGATGCATCCCTGCTGACGCCGGCGGCCGTGTCCTGGACGGCGTGGCGTC
CGATTTGCCGCTACCGATGTGGGCGGTCAGGTCCTGGATGGCGCTGCGTC
CGATTTGCCGCTACCGATGTGGGCGGTCAGGTCCTGGATGGCGCTGCGTC
CGATGCGTCGCCACTGACGTCGGCGGCGGGGTCGCGGACGGCGTTGCGTC
CGATGCGTCGCCACTGACGTCGGCGGCGGGGTCGCGGACGGCGTTGCGTC
CGATACGTCGCCACTGACGTCGGCGGCGGGGTCGCGGACGGCGTTGCGTC
CGATGCGTCGCCACTGACGTCGGCGGCGGGGTCGCGGACGGCGTTGCGTC
--------------------------------------------------
--------------------------------------------------
--------------------------------------------------
--------------------------------------------------
CGACGTACGGTGACTAATGCCAGAGGTCAGGGCCTGGATGGCATGGCGGC
CGCTGCACCGCTACTGATGTCGGCGCTTAGGCCGCGGATGGGAGCCGATC
CGCTGCACCGCTACTGATGTCGGCGCTTAGGCCGCGGATGGGAGCCGATC
CGACTTATCGCTACTGATGTTGGCGGCCGGGTGCTGGATGGCGCTGCGTC
CGACTTATCGCTACTGATGTTGGCGGCCGGGTGCTGGATGGCGCTGCGTC
CGACTTATCGCTACTGATGTTGGCGGCCGGGTGCTGGATGGCGCTGCGTC
CGACTTATCGCTACTGATGTTGGCGGCCGGGTGCTGGATGGCGCTGCGTC
CAATGTAGCGCCACTGACGTCGGCGGCCCGGTCGTATATAACGCTGCGCT
CAATGTAGCGCCACTGACGTCGGCGGCCCGGTCGTATATAACGCTGCGCT
CG------------------------------------------------
CG------------------------------------------------
CG------------------------------------------------
CG------------------------------------------------
CG------------------------------------------------
CGATGCATCGCTGTTGATGTCGGCGGTCAAGGCCTGGATGGCGTTGCATT
CGATGCATCGCTGTTGATGTCGGCGGTCAAGGCCTGGATGGCGTTGCATT
CGATGCATCGCTGTTGATGTCGGCGGTCAAGGCCTGGATGGCGTTGCATT
CGATGCATCGCTGTTGATGTCGGCGGTCAAGGCCTGGATGGCGTTGCATC
CGATGCATCGCTGTTGATGTCGGCGGTCAAGGCCTGGATGGCGTTGCATC
CGATGCATCGCTGTTGATGTCGGCGGTCAAGGCCTGGATGGCGTTGCATC
CGATGCATCGCTGCGGATGTCGGCGGTGATTCCCAGCATGGCGTGGCCCC
CGATGCATCGCTGCGGATGTCGGCGGTGATTCCCAGCATGGCGTGGCCCC
CGATGCATCGCTGCGGATGTCGGCGGTGATTCCCAGCATGGCGTGGCCCC
CGATGCATCGCTGCGGATGTCGGCGGTGATTCCCAGCATGGCGTGGCCCC
CGATGTATCGCTGCTGATGTCGGCGGTCAGGTCCTGGATGGCACTGCGCC
---TGTGTCGTCGCCGATGTCAGCGACCAGGTCTTGGACGGCGTCGCGTC
---TGTATCGCTATTGGTGTCGGCGCTCAGGTCCTGGATAGCGTTGCATC
CGACTTATCACTGCTGACG-------------------------------
CAATGCATCGCTGATGATGTCGGC--------------------------
CTGTGCATCGCTGCTGGTGTCGGCGGCCATGTCGAGGATGGTGTTGCGCC
CTGTGCATCGCTGCTGGTGTCGGCGGCCATGTCGAGGATGGTGTTGCGCC
CGATGTATCGCTGCTGACGTCGGCGCTCAGGTCCTGGACGGTGTTGCGCC
CGATGTATCGCTGCTGACGTCGGCGCTCAGGTCCTGGACGGTGTTGCGCC
CGATGTATCGCTGCTGACGTCGGCGCTCAGGTCCTGGACGGTGTTGCGCC
-----------------------CGGTCAGGTCCTGGATGGCGTTGCATC
-----------------------CGGTCAGGTCCTGGATGGCGTTGCATC
-----------------------CGGTCACGTCCTGGATGGCGTTGCATC
CTGTGCATCGCTGCTGATGTCGGCGGCCATGTCGAGGATGGTGTTGCGCC
-----------------------CGGTCACGTCCTGGATGGCGTTGCATC
-----------------------CGGTCAGGTCCTGGATGGCGTTGCATC
TAATTCATCGCTGCTGATGCTGGAGGTCATGTTGTGGATGGCGCTGCGTT
CGAGGTGTCTCGAGTGATGTCGGCGGCCAGGTTCCGGATGGCGCTGCGTC
CG------------------------------------------------
------------------GCCGGCGGTGGGGTCCTGGACGACGTTGCGTC
------------------GCCGGCGGTGGGGTCCTGGACGACGTTGCGTC
------------------GCCGGCGGTGGGGTCCTGGACGACGTTGCGTC
------------------GCCGGCGGTGGGGTCCTGGACGACGTTGCGTC
CGATGTATCGCTGCTGGTGCTGTCG--CGTTGCCT---------------
CGATTCAGCGCTACGGATGCTGTCGGTCAGGTCCT---------------
CGATTCAGCGCTACGGATGCTGTCGGTCAGGTCCT---------------
CA------------------------------------------------
CGATTCAGCGCTACGGATGCTGTCGGTCAGGTCCT---------------
CGATTCAGCGCTACGGATGCTGTCGGTCAGGTCCT---------------
CGATTCAGCGCTACGGATGCTGTCGGTCAGGTCCT---------------
CA------------------------------------------------
CGATGTATCGCTGCTGGTGCCGGCGGTGGGGTCCTGGACGACGTTGCGTC
CGATGTATCGCTGCTGGTGCCGGCGGTGGGGTCCTGGACGACGTTGCGTC
CGATGTATCGCTGCTGGTGCCGGCGGTGGGGTCCTCGACGACGTTGCGTC
CGATGTATCGCTGCTGGTGCCGGCGGTGGGGTCCTGGACGACGTTGCGTC
CGATGCATGGCTGCTGACGTCGGCGCTCAAGTCCTGGACGGCGTGGCGTC
CGATGCATGGCTGCTGACGTCGGCGCTCAAGTCCTGGACGGCGTGGCGTC
CGGTTCATCGCTGCTGATGCTGGAGGTCATGTCATGGATGGCGTTGCATC
CGGTTCATCGCTGCTGATGCTGGAGGTCATGTCATGGATGGCGTTGCATC
--ATGCACCGCTGCTTATGCCGGCGGTCAGGTCCTGGATGGCACTGCGTC
CGATGCGCTGCCACTGATGTCAGGGTTGAGACTCTGGATGGCGTTGT-CC
CGATGTATCGCTGCTGGTGCCGGCGGTGGGGTCCTGGACGACGTTGCGTC
TGCGTCGTCGCTGCAGATGTCGGCGGTCAGGTCCTGGACGGCGCTGCGTC
TGCGTCGTCGCTGCGGATGTCGGCGGTCAGGTCCTGGACGGCGCTGCGTC
TGCGTCGTCGCTGCAGATGTCGGCGGTCAGGTCCTGGACGGCGCTGCGTC
CGATGCATTGCTTCTGATGTCGGCGGCCACTTTGTGGATGGCGTGGCGTC
CGATTCATGGCTACTGACGCCGGTGGTCCGATCCTGGATGGCGTGGCGTC
CGATGTATCGCTGCGGATGTCGGCGGTCAGGCCCTGGATGGCATTGCGTC
CCATGAATCACTGCTGATGTCGGCGGCGCCGTCGTGGACGGTGTTGTGTG
CCATGAATCACTGCTGATGTCGGCGGCGCCGTCGTGGACGGTGTTGTGTG
CCATGAATCACTGCTGATGTCGGCGGCGCCGTCGTGGACGGTGTTGTGTG
CGATTCATGGCTACTGACGCCGGTGGTCCGATCCTGGATGGCGTGGCGTC
CGATTCATGGCTACTGACGCCGGTGGTCCGATCCTGGATGGCGTGGCGTC
CGATTCATGGCTACTGACGCCGGTGGTCCGATCCTGGATGGCGTGGCGTC
CGGTCTATCGCTATTGATATCGGCGGTCCGGTAGTGAATGGTATGGCGTC
CGATGTATCGCCACTAATGCAGGCGCTCAGATGGTGGATAGTGTTGCGTT
CGACGTACTACTACTGGTGTCGGCAGTCCAGGTCTGGATGGGGTCGCGTT
CGATGCATCGCTTCGAATGTCGGCGGGCAAGCTCTGGATGGCATGGCGTC
----------------------------AGGTCCTGGATGGTGTTGCGTC
CGATCTATCGCCGCTGATGTGGGCGGCCAGGTCGTGGGTGGCGTTGCGTC
CGATCTATCGCCGCTGATGTGGGCGGCCAGGTCGTGGGTGGCGTTGCGTC
CGATCTATCGCCGCTGATGTGGGCGGTCAGGTCGTGGGTGGCGTTGCGTC
CGATCTATCGCCGCTGATGTGGGCGGTCAGGTCGTGGGTGGCGTTGCGTC
----------------------------AGGTCCTGGATGGTGTTGCGTC
CGATGTATCACCACTGATGTCGGCGGTCGTGTCCTGGTTGGCGCTGCGTT
CTCTGTATCGCTGCTTATGTCTGCGTCCAGGTTCTGGACGGCGCTGAGTC
--------------------------------------------------
CAATGTATCGCTGCCGATGCCGGCGGTGAGGTTCTGGATGGCGTTGCGCC
CAATGTATCGCTGCCGATGCCGGCGGTGAGGTTCTGGATGGCGTTGCGCC
-----------------------------GACCCTGGACGGCGGTGCGTC
CGGTGTGTCGCTACGGATGTCGGCGGTCGGGTCGTGGACGGCGGTGCGTC
CGGTGTGTCGCTACGGATGTCGGCGGTCGGGTCGTGGACGGCGGTGCGTC
CGGTGTGTCGCTACGGATGTCGGCGGTCGGGTCGTGGACGGCGGTGCGTC
CGGTGTGTCGCTACGGATGTCGGCGGTCGGGTACTGGATGGTGCGGCGTC
CGGTGTGTCGCTACGGATGTCGGCGGTCGGGTACTGGATGGTGCGGCGTC
TGATGTATCGCTTCTGATGTCGGCGGTGAGGTCCTGGATGGCGGTGCGTC
GGATTCATCGCTGCTGATGTCGGTGGTGCTTCGGT---------------
GGATTCATCGCTGCTGATGTCGGTGGTGCTTCGGT---------------
GGTGCCATCGCTGCTGATGTCGACGGTGAGGTCCTGGATGGCGGTGCATC
GGTGCCATCGCTGCTGATGTCGACGGTGAGGTCCTGGATGGCGGTGCATC
GGAGTCATCGCTGCTGATGTCGGCGGTGAGGTCCTGGATGGCGGTGCGTG
CAATGTATCGCTGCTAATGCAGGCGCTCCGGTCCTGGATGGCGGTGCGTA
GGAGTCATCGCTGCTGATGTCGGCGGTGAGGTCCTGGATGGCGGTGCGTG
---TTTATCGCTGCTGATATCGGCTTTCAGGCCATGGATAGCGTTGCGTT
CGATGTAGCGCTGATGATGTCGGCGGTTGTGTTCTGGGTGGCGCTACGTC
CGATGTAGCGCTGATGATGTCGGCGGTTGTGTTCTGGGTGGCGCTGCGTC
-----------------------------GACCCTGGACGGCGGTGCGTC
-----------------------------GGCCCTGGACGGCGGTGCGTC
-----------------------------GGCCCTGGACGGCGGTGCGTC
-----------------------------GGCCCTGGACGGCGGTGCGTC
CGCTTCATCGCCACGGATATCGGCGGTCGGGTCCTGGACGGCGGTGCGTC
CGCTTCATCGCCACGGATATCGGCGGTCGGGTCCTGGACGGCGGTGCGTC
CGCTTCATCGCCACGGATATCGGCGGTCGGGTCCTGGACGGCGGTGCGTC
CGCTTCATCGCCACGGATATCGGCGGTCGGGTCCTGGACGGCGGTGCGTC
CGCTTCATCGCCACGGATATCGGCGGTCGGGTCCTGGACGGCGGTGCGTC
CGCTTCATCGCCACGGATATCGGCGGTCGGGTCCTGGACGGCGGTGCGTC
CGCTTCATCGCCACGGATATCGGCGGTCGGGTCCTGGACGGCGGTGCGTC
CGGTGTGTCGCTACGGATGTCGGCGGTCGGGTCCTGGACGGCGGTGCGTC
CGCTTCATCGCCACGGATATCGGCGGTCGGGTCCTGGACGGCGGTGCGTC
CGATGTCGCGCTGCTGGTGTCCGCGGTGAGGTCCTGGGCGGTGCTGCGTC
CGATGTATTGCTGCTGATGTCTGTAGTTGGGTTATGAGTAGCGTTGCGCC
CGATGTATTGCTGCTGATGTCTGTAGTTGGGTTATGAGTAGCGTTGCGCC
CGATGTATCACTGCGGATGTCGGCGGTTAGGTCCTTGATGGCGTGGCATC
CGATGCACCGCCACTGATGCCGGCGGTCAGGTCCTGGACGGCGTTGCGTC
CGATGCACCGCCACTGATGCCGGCGGTCAGGTCCTGGACGGCGTTGCGTC
CGATGCACCGCCACTGATGCCGGCGGTCAGGTCCTGGACGGCGTTGCGTC
CGATGCACCGCCACTGATGCCGGCGGTCAGGTCCTGGACGGCGTTGCGTC
CGATGTTGCGCTGCTGGTGTCCGCGGTGAGGTCCTGGGCGGTGCTGCGTC
CGATGTCGCGCTGCTGGTGTCCGCGGTGAGGTCCTGGGCGGTGCTGCGTC
CGATGTCGCGCTGCTGGTGTCCGCGGTGAGGTCCTGGGCGGTGCTGCGTC
CGATGTCGCGCTGCTGGTGTCCGCGGTGAGGTCCTGGGCGGTGCTGCGTC
CGACGTACCGCTGCTGATGCCGGCGGTCCGGCCCTGGACAGCGCAGCGTT
CGGTTTATCGCTGCTGATGTTGACCGTCAGGTCCTGGATGGCGTGACGTC
CGTTTGATCGCTGCTGATGTTGGCCGTCAGGTTATGCATGGCGCTGCGTC
TGAATCGCCGCCACTGCTGTCGGCGGTCAGGTGCTGGGCGGCGCCGCGCT
TGAATCGCCGCCACTGCTGTCGGCGGTCAGGTGCTGGGCGGCGCCGCGCT
TGAATCGCCGCCACTGCTGTCGGCGGTCAGGTGCTGGGCGGCGCCGCGCT
TGAATCGCCGCCACTGCTGTCGGCGGTCAGGTGCTGGGCGGCGCCGCGCT
TGAATCGCCGCCACTGCTGTCGGCGGTCAGGTGCTGGGCGGCGCCGCGCT
TGAATCGCCGCCACTGCTGTCGGCGGTCAGGTGCTGGGCGGCGCCGCGCT
AGATTTATCGCCACGGATGCCGGCGGTTAGCACCCTGATGGCGTGGCATC
CAATGTGTGGCTGCTGATGCCGGAGGTGGGGCTGTGGATGGATCTGCGT-
CAATGTGTGGCTGCTGATGCCGGAGGTGGGGCTGTGGATGGATCTGCGT-
TGATGTATATTTACGGATGCCGGCGGTGAGGCCCTGGATGGCGCTGCGCT
CGATGTATATTTACGGATGTCGTCGTCCAGGTTGTGGACGTCGCTGCGTC
CGATGTATATTTACGGATGTCGTCGTCCAGGTTGTGGACGTCGCTGCGTC
-----------------------------GGTCCTGGATGGTGTGGCATC
CTACGTACCGCCGCTGATGCCGGCGGTCAGGTCCTGGATGGCGCTTCATC
CTACGTACCGCCACTGATGCCGGCGGTCAGGTCCTGGATGGCGCTTCATC
CTACGTACCGCCACTGATGCCGGCGGTCAGGTCCTGGATGGCGCTTCATC
CTACGTACCGCCACTGATGCCGGCGGTCAGGTCCTGGATGGCGCTTCATC
CGATGTATGGCTGCTGATGTCGGTGCGCCGGCCCCGGCGCGCGTTGCGCC
CGATTTATCGCTACGGGTGTCGCCAGCCATGTCCTGGATGGCGCTGCGTG
CGTTG-CT-GCTAAGAGTGTCAGCGGTCATGGCCCGGATGGCGTTGCGTC
CGTTG-CT-GCTAAGAGTGTCAGCGGTCATGGCCCGGATGGCGTTGCGTC
CGATGTATGGCTGCTGATGTCGGTGCGCCGGCCCGGGCGCGCGTTGCGCC
CGATGTATGGCTGCTGATGTCGGTGCGCCGGCCCCGGCGCGCGTTGCGCC
CGATGTATGGCTGCTGATGTCGGTGCGCCGGCCCGGGCGCGCGTTGCGCC
CGCTGCATCGCTGCTGATGTCGGTGCTCGGGTCGCGGATGGCGTTGCGTC
CGCTGCATCGCTGCTGATGTCGGCGGTCTGGTCCTGGATGACGTGGCGTC
-----------------------------GGTCCGGGACGGCGCTGGGTC
CGATTTATCGCTACGGGTGTCGCCAGCCATGTCCTGGATGGCGCTGCGTG
CGATTCATCCCTGCCGGTGTCGGTTGCTATGTCCTGAATGGCGTTGTGTC
CGATTTACCGCTACTC----------------------------------
CGATGTATAGCGGCTCATGTCGGCGGTCGGGTCCTGGATGAGGCTGCGTC
CGATGTATAGCGGCTCATGTCGGCGGTCGGGTCCTGGATGAGGCTGCGTC
--------------------------------------------------
CGATTTATCGCTACGGGTGTCGCCAGCCATGTCCTGGATGGCGCTGCGTG
CGATTTATCGCTACGGGTGTCGCCAGCCATGTCCTGGATGGCGCTGCGTG
CGATTTATCGCTACGGGTGTCGCCAGCCATGTCCTGGATGGCGCTGCGTG
CGATTTATCGCTACGGGTGTCGCCAGCCATGTCCTGGATGGCGCTGCGTG
AGACTCCGCGCTACTCATGTCGGCGGTCCGGTGGTGGACGGCGTTGCACC
AGACTCCGCGCTACTCATGTCGGCGGTCCGGTGGTGGACGGCGTTGCACC
AGACTCCGCGCTACTCATGTCGGCGGTCCGGTGGTGGACGGCGTTGCACC
AGACTCCGCGCTACTCATGTCGGCGGTCCGGTGGTGGACGGCGTTGCACC
AGACTCCGCGCTACTCATGTCGGCGGTCCGGTGGTGGACGGCGTTGCACC
CGATGTGTCGCTACTGATGTTTGCGGTCGGGGGCTGGATGGCGCGCCTTT
CGATGCGCCGCCACTGATGTCGGCGGCGAGGTCGTGGATGGCGCTGCGTT
CGATGCGCCGCCGCTGATGTCGGCGGTCAGGTCCTGGATGGCTCTGTTTT
CGATGCACCGCCACTGATGTCGGCGGCGAGGTCGTGGATGGCGCTGCGTT
CGATGCACCGCCACTGATGTCGGCGGCGAGGTCGTGGATGGCGCTGCGTT
CGATGCACCGCCACTGATGTCGGCGGCGAGGTCGTGGATGGCGCTGCGTT
CGATGTATCACCGCTGATGCCGGCGGTTCGGTCCGGGGTGGCGCTGTGTC
CGATGTATCGCTGCTGATGTCTGTGGACAGGTCCTGGGCGGCGCCGCGTC
CGATGTATCGCTGCTGATGTCTGTGGACAGGTCCTGGGCGGCGCCGCGTC
CGATGCAGTGGCACGGATGCCGGCGGTCAATCCCTGGACGGCGTTGCGCT
CGATGCATCCCTGTTGATGTCTGCTGTGAGGTTCTGGATGGCGTTGCGTC
CGATGTATCACCGCTGATGCCGGCGGTTCGGTCCGGGGTGGCGCTGTGTC
CGATGTATCACCGCGGATGCCGGCGGTTCGGTCCGGGGTGGCGCTGTGTC
CGGTGCATGGCTGCTGATGTCGGCGGTCGTGTCCTGGGCGGCGTTGCGTC
CGGTGTATGGCTGCTGATGTCGGCGGTCGTGTCCTGGGCGGCGTTGCGTC
CGGTGCATGGCTGCTGATGTCGGCGGTCGTGTCCTGGGCGGCGTTGCGTC
CGGTGCATGGCTGCTGATGTCGGCGGTCGTGCCCTGGGCGGCGTTGCGTC
CGGTGCATGGCTGCTGATGTCGGCGGTCGTGTCCTGGGCGGCGTTGCGTC
CGATGTATCGCTGCTGATGTCTGTGGACAGGTCCTGGGTGGCGCCGCGTC
CGATGTATCGCTGCTGATGTCTGTGGACAGGTCCTGGGCGGCGCCGCGTC
CGATGTATCGCTGCTGATGTCTGTGGACAGGTCCTGGGCGGCGCCGCGTC
CGATGCACTGCCACTGGTATCGGCTGTCAGGCCATGGATGGTGTT-TGCT
CGATGCAGTGGCACGGATGCCGGCGGTCAATCCCTGGACGGCGTTGCGCT
CGATGCAGTGGCACGGATGCCGGCGGTCAATCCCTGGACGGCGTTGCGCT
CGATGCAGTGGCACGGATGCCGGCGGTCAATCCCTGGACGGCGTTGCGCT
CGATGCAGTGGCACGGATGCCGGCGGTCAATCCCTGGACGGCGTTGCGCT
CGATGCAGTGGCACGGATGCCGGCGGTCAATCCCTGGACGGCGTTGCGCT
CGATGCAGTGGCACGGATGCCGGCGGTCAATCCCTGGACGGCGTTGCGCT
CGATGTGTCGCTACTGATGTTTGCGGTCGGGGGCTGGATGGCGCGCCTTT
CGATGTGTCGCTACTGATGTTTGCGGTCGGGGGCTGGATGGCGCGCCTTT
CGATGTGTCGCTACTGATGTTTGCGGTCGGGGGCTGGATGGCGCGCCTTT
CGATGCAGTGGCACGGATGCCGGCGGTCAATCCCTGGACGGCGTTGCGCT
CGTCGTATCGCTACTGATGCCGGCGGTCAAGCTCTAGATGGCGTTACGTC
CG----------ACTCCTGTTGGCAGTCAGGCCCTGGACGGCGTGTTGCT
CG----------ACTCCTGTTGGCAGTCAGGCCCTGGACGGCGTGTTGCT
CG----------ACTCCTGTTGGCAGTCAGGCCCTGGACGGCGTGTTGCT
CG----------ACTCCTGTTGGCAGTCAGGCCCTGGACGGCGTGTTGCT
CGATGTATCGCTGCGGATGTCGCTGGTGAGGTTGTGGAGGGCGTGGCGTC
CGATGTATCGCTGCAGATGTCGCTGGTGAGGTTGTGGAGGGCGTGGCGTC
CGATGTATCGCTGCGGATGTCGCTGGTGAGGTTGTGGAGGGCGTGGCGTC
CGATGTATCGCTGCGGATGTCGCTGGTGAGGTTGTGGAGGGCGTGGCGTC
CGATGTATCGCTGCGGATGTCGCTGGTGAGGTTGTGGAGGGCGTGGCGTC
CGATGTATCGCTGCGGATGTCGCTGGTGAGGTTGTGGAGGGCGTGGCGTC
CGATGTATCGCTGCGGATGTCGCTGGTGAGGTTGTGGAGGGCGTGGCGTC
CGATGTATCGCTGCGGATGTCGCTGGTGAGGTTGTGGAGGGCGTGGCGTC
CGATGTATCGCTGCGGATGTCGCTGGTGAGGTTGTGGAGGGCGTGGCGTC
CGTCGTATCGCTACTGATGCCGGCGGTCAAGCTCTAGATGGCGTTACGTC
TGATACATTGCTACGGATGTCGGCGGGGAGGCCCTGGATGATGGTGCGTC
TGATACATTGCTACGGATGTCGGCGGGGAGGCCCTGGATGATGGTGCGTC
--------CGCGACTCCTGTTGGCAGTCAGGCCCTGGACGGCGTGTTGCT
CGACGTATCGCTACGGGTGTCGGCGGTCAGGCCCTGGATAGCATTGCGCC
--ATGGCC-AC-ACTGATGTCGGCGGTGGGGTCCTGGGTGGCGTTGCGTC
--ATGGCC-AC-ACTGATGTCGGCGGTGGGGTCCTGGGTGGCGTTGCGTC
--ATGGCC-AC-ACTGATGTCGGCGGTGGGGTCCTGGGTGGCGTTGCGTC
--ATGGCC-AC-ACTGATGTTGGCGGTGGGGTCCTGGGTGGCGTTGCGTC
--ATGGCC-AC-ACTGATGTTGGCGGTGGGGTCCTGGGTGGCGTTGCGTC
--ATGGCC-AC-ACTGATGTTGGCGGTGGGGTCCTGGGTGGCGTTGCGTC
--ATGGCC-AC-ACTGATGTCGGCGGTGGGGTCCTGGGTGGCGTTGCGTC
--ATGGCC-AC-ACTGATGTCGGCGGTGGGGTCCTGGGTGGCGTTGCGTC
--ATGGCC-AC-ACTGATGTCGGCGGTGGGGTCCTGGGTGGCGTTGCGTC
--ATGGCC-AC-ACTGATGTCGGCGGTGGGGTCCTGGGTGGCGTTGCGTC
--ATGGCC-AC-ACTGATGTCGGCGGTGGGGTCCTGGGTGGCGTTGCGTC
--ATGGCC-AC-ACTGATGTCGGCGGTGGGGTCCTGGGTGGCGTTGCGTC
CGATGCATCGCCACTGATGTTAGCGGTCAGGGCCTGGATGGCGTGGCATC
CAATGTATTGCTGCTGATGCCGACGGTTATGTCCTGGATGGCGTTGCGTC
CGACTCATTGCTACGGATGTCGGCGGCCAGGCCCTGGATGGCGTGGCGTG
CGACTCATTGCTACGGATGTCGGCGGCCAGGCCCTGGATGGCGTGGCGTG
CGACTCATTGCTACGGATGTCGGCGGCCAGGCCCTGGATGGCGTGGCGTG
CGACTCATTGCTACGGATGTCGGCGGCCAGGCCCTGGATGGCGTGGCGTG
CGATGCATCGCTGCTGATGTCGGCGTCCAGGTCCTGGGTGGCGTTGCTTA
CGATGTATCCGTACGCGTGTCAGCCGCCA--T-CTGCATGGAGCTGCATC
CGATGCATCGCTAATGATATTGACGATCAGGTCCTGAACGGCGTCGTGTC
CGATGCATCGCTGCTGATGCCGGCGGCCAGGTCCTGGAGGGGGCGGTGCC
CGATGTATCACTGCCGATGTCCGCTGTCCGGTCCTGGAGGGCGTGGCGT-
CGATGTATCGCTGCCGATGCCGGCGGTGAGGCCTTGGGTGGTGCTGCCTC
CGATGTATCGCTGCCGATGCCGGCGGTGAGGCCTTGGGTGGTGCTGCCTC
CGATGTATCGCTGCCGATGCCGGCGGTGAGGCCTTGGGTGGTGCTGCCTC
CGATGTATCGCCTCCGATGTCGGCGGTGAGGTCCTGGATGGCGTTGCGTT
CGATGTATCGCCTCCGATGTCGGCGGTGAGGTCCTGGATGGCGTTGCGTT
CGATGTATCGCCTCCGATGTCGGCGGTGAGGTCCTGGATGGCGTTGCGTT
CGATGCATCGCTGCTGATGCCGGCGGCCAGGTCCTGGAGGGGGCAGTGCC
CGATGCATCGCTGCTGATGCCGGCGGCCAGGTCCTGGAGGGGGCGGTGCC
CGATGCATCGCTGCTGATGCCGGCGGCCAGGTCCTGGAGGGGGCGGTGCC
CGATGCATCGCTGCTGATGCCGGCGGCCAGGTCCTGGAGGGGGCGGTGCC
CGATGCATCGCTGCTGATGCCGGCGGCCAGGTCCTGGAGGGGGCGGTGCC
CTATGCATGGCTGCTGATGTTAGTGGCCAGGTCCTGGATGGCGTTGCGTC
CTATGCATGGCTGCTGATGTGAGTGGCCAGGTCCTGGATGGCGTTGCGTC
CGATGCGTCGCTGCTGATGTCGGTAGCCAGGCTCCGAGTGGCATTGCGTC
CGATGCGTCGCTGCTGATGTCGGTAGCCAGGCTCCGAGTGGCATTGCGTC
CTCTTTATCGCTACT-ACTTCGGCGGCCGGGCCCCGAATGGCGTTGCCTC
TGATGTATCGCGACGGACGCCGGCGGCCAGGTCTGGGCTGGCGCTGCGTG
TGATGTATCGCGACGGACGCCGGCGGCCAGGTCTGGGCTGGCGCTGCGTG
TGATGTATCGCGACGGACGCCGGCGGCCAGGTCTGGGCTGGCGCTGCGTG
CGATGTATCACTGCCGATGTCCGCAGTCCGGTCCTGGAGGGCGTGGCTGT
CGATGTATCACTGCCGATGTCCGCAGTCCGGTCCTGGAGGGCGTGGCTGT
CGATGTATCACTGCCGATGTCCGCAGTCCGGTCCTGGAGGGCGTGGCTGT
CGATGTATCACTGCCGATGTCCGCAGTCCGGTCCTGGAGGGCGTGGCTGT
CGATGTATCACTGCCGATGTCCGCAGTCCGGTCCTGGAGGGCGTGGCTGT
CAATGTGTCCCTGCCGATGTCGGCGTTCAGGTCCTGGACGGCGTGGCGTT
CGATGTGTCGCTACTGACGTCGGCAGTCAGGTCGTGGATGGCGCTGCGTC
CGCTTGACCGCTA-TGATGTCGGCGGTCAGGTGATGGACATCGTTGCGCT
TGATGGATCGCTGCTGATGTCGGCGGCCCGGTCCTGGGTGGGGTGGCGTC
-GATGTATCGCTGCTGATGTCGGCGGTCAGGTCCTGCATGGCGCGGCGTC
CGATGTGTCGCTGCTGATGTCGGCGGCCAGGTCGTGGATGGCGTTGCGCC
CGATGTGTCGCTGCTGATGTCGGCGGCCAGGTCGTGGATGGCGTTGCGCC
CGATGTGTCGCTGCTGATGTCGGCGGCCAGGTCGTGGATGGCGTTGCGCC
CGATGTGTCGCTGCTGATGTCGGCGGCCAGGTCGTGGATGGCGTTGCGCC
CGATGTGTCGCTGCTGATGTCGGCGGCCAGGTCGTGGATGGCGTTGCGCC
CGATGTGTCGCTGCTGATGTCGGCGGCCAGGTCGTGGATGGCGTTGCGCC
CGATGTGTCGCTGCTGATGTCGGCGGCCAGGTCGTGGATGGCGTTGCGCC
CAATGCATCGCTGCGGACGTTAGCGGTCATGTCCTGGGTGGCGTTGCGTC
CAATGCATCGCTGCGGACGTTAGCGGTCATGTCCTGGGTGGCGTTGCGTC
--------------------------------------------------
--------------------------------------------------
CGCTTGACCGCTA-TGATGTCGGCGGTCAGGTGGTGGACATCGTTGCGCT
CGCTTGACCGCTA-TGATGTCGGCGGTCAGGTGGTGGACATCGTTGCGCT
CGCTTGACCGCTA-TGATGTCGGCGGTCAGGTGGTGGACATCGTTGCGCT
CGCTTGACCGCTA-TGATGTCGGCGGTCAGGTGGTGGACATCGTTGCGCT
CGCTTGACCGCTA-TGATGTCGGCGGTCAGGTGGTGGACATCGTTGCGCT
CGGTTTGCCGCTGCGGATGTCGGCGGCCAGGTCGTATACGGCGTTGCGTC
CGGTTTGCCGCTGCGGATGTCGGCGGCCAGGTCGTATACGGCGTTGCGTC
CGGTTTGCCGCTGCGGATGTCGGCGGCCAGGTCGTATACGGCGTTGCGTC
CGGTTTGCCGCTGCGGATGTCGGCGGCCAGGTCGTATACGGCGTTGCGTC
CGGTTTGCCGCTGCGGATGTCGGCGGCCAGGTCGTATACGGCGTTGCGTC
CGATGCGCCGCTGCTGATGTCGGCGGCCGTGCCGTGGATGGCGCTGCGTC
CGATGCGCCGCTGCTGATGTCGGCGGCCGTGCCGTGGATGGCGCTGCGTC
TGATGGATCGCTGCTGATGTCGGCGGCCCGGTCCTGGGTGGGGTGGCGTC
--------------------------------------------------
--------------------------------------------------
AGATGCATCGCCACTGATGTCGGCCTTGTGGTCCTGGATGGCGTTACGTC
CGATGCATCGCTGCGGACGTTAGCGGTCATGTCCTGGGTGGCGTTGCGTC
AAATGTATGGCCACTGGTGTTGGCGGTCATTCCCTGGACGG-GCTGCCTT
GG---------------------TGGCCAGGTCGCATATAGCGCTGCGTT
GG---------------------TGGCCAGGTCGCATATAGCGCTGCGTT
GG---------------------TGGCCAGGTCGCATATAGCGCTGCGTT
CGGTTTGCCGCTGCGGATGTCGGCGGCCAGGTCGTATACGGCGTTGCGTC
CGGTTTGCCGCTGCGGATGTCGGCGGCCAGGTCGTATACGGCGTTGCGTC
AGATGCATCGCTGCAAATATTGCCGGTGAAATCCTGGGCGACTTTGCGTT
CGGTTTGCCGCTGCGGATGTCGGCGGCCAGGTCGTATACGGCGTTGCGTC
CGGTTTGCCGCTGCGGATGTCGGCGGCCAGGTCGTATACGGCGTTGCGTC
CGATTCAGAGCAACTGATATCGGCGGTCAGGCTCTGGGTGGCGCTGCGTC
CGATTCAGAGCAACTGATATCGGCGGTCAGGCTCTGGGTGGCGCTGCGTC
CGATTCAGAGCAACTGATATCGGCGGTCAGGCTCTGGGTGGCGCTGCGTC
CAATGTACCCGCACTGATGCCGGCGGTCGGGCCGTGCCC-----------
CGGCTCATCGCTGCTGATGCCGGCGGTGGGGCCGTGG-GCGCGGT-----
CGATGTGTTGCTGCTGACGTGTGC--------------------------
CGATGTGTTGCTGCTGACGTGTGC--------------------------
CGATGTGTTGCTGCTGACGTGTGC--------------------------
CGATGTGTTGCTGCTGACGTGTGC--------------------------
CGATGTGTTGCTGCTGACGTGTGC--------------------------
CGATGTGTTGCTGCTGACGTGTGC--------------------------
CGATGTGTTGCTGCTGACGTGTGC--------------------------
CGATGTGTTGCTGCTGACGTGTGC--------------------------
CGATGCATTGCTGCTGCTGCGGGCGG------------------------
CGATGCATTGCTGCTGCTGCGGGCGG------------------------
CGATGTATTGCTGCTGCTGTCGGCGGCCAGGTGATGGACAGTGCTTTGCT
CGATGTATTGCTGCTGCTGCCGGCGGCCAGGTGATGGACAGTGTTTTGCT
CGATGTATCACAACTGATGTCGGCGCTCAGGTGCTGGATGGCGTGGCGTC
CGATGTATCACAACTGATGTCGGCGCTCAGGTGCTGGATGGCGTGGCGTC
CGGCTCCTCGCTGCTGATGCCGGCGGTGGGGCCGTGGG-CGCGGT-----
CGGCTCATCGCTGCTGATGCCGGCGGTGGGGCCGTGGA-CGCGGT-----
CGGCTCATCGCTGCTGATGCCGGCGGTGGGGCCGTGGG-CGCGGT-----
CGGCTCCTCGCTGCTGATGCCGGCGTTGGGGCCGTGGG-CGCGGT-----
CGATGTGTTGCTGCTGACGTGTGC--------------------------
CGATGTGTTGCTGCTGACGTGTGC--------------------------
TGATGCATCGCTGCTGATGTTGGAGGCCAGGTCCTGGATGACGTTGCGCC
TGATGCATCGCTGCTGATGTTGGAGGCCAGGTCCTGGATGACGTTGCGCC
TGATGCATCGCTGCTGATGTTGGAGGCCAGGTCCTGGATGACGTTGCGCC
CGATGTATTGCTGCTGA---------------------------------
CGATGTATTGCTGCTGGTGCTGTCGGCCAGGTGATGGACAGTGCTTTGCT
CGATGTATTGCTGCTGGTGCTGTCGGCCAGGTGATGGACAGTGCTTTGCT
CGATGTATTGCTGCTGGTGCTGTCGGCCAGGTGATGGACAGTGCTTTGCT
CTATGTATCGCTGCTGGTGTCGGAGGTCATGTCCTGGATGGCGTTGCGTC
CGATGTATCGCTGCTGATGTCGGTGGTCAGGTCGTGGATGGCGTCGCGTC
CGGTGCATCGCTGCTGATGCCGGTGCTCGGGTCGCGGATGGCGTTGCGTC
GGATGTGTTTCTACTGGTACCGGTGGCCAGGTCCTAGATGGCGTTGCGTT
CAATGTACCCCCACTGATGCCGGCGGTCGGGCCCTGGATAGCGCTGCGCC
CAATGTACCCCCACTGATGCCGGCGGTCGGGCCCTGGATAGCGCTGCGCC
CAATGTACCCCCACTGATGCCGGCGGTCGGGCCCTGGATGGCGCTGCGCC
CAATGTACCCCCACTGATGCCGGCGGTCGGGCCCTGGATGGCGCTGCGCC
CAATGTACCCGCACTGATGCCGGCGGTCGGGCCCTGGATGGCGCTGCGCC
CAATGTACCCGCACTGATGCCGGCGGTCGGGCCCTGGATGGCGCTGCGCC
CGATGTGTTGCTGCTGACGT--GC--------------------------
CGATGTGTCGCTGCTGATGTCGGCGGTCATGTCCTGGACGGCGTGACGTC
CGATGTGTCGCTGCTGATGTCGGCGGTCATGTCCTGGACGGCGTGACGTC
CGGTGCATCGCTGCTGCTGCCGGTGCTCGGGTCGCGGATGGCGTTGCGTC
CGGTGCATCGCTGCTGATGCCGGTGCTCGGGTCGCGGATGGCGTTGCGTC
CGGTGCATCACTGCTGATGCCGGTGCTCGGGTCGCGGATGGCGTTGCGTC
CGGTGCATCGCTGCTGATGCCGGTGCTCGGGTCGCGGATGGCGTTGCGTC
CGGTGCATCGCTGCTGATGCCGGTGCTCGGGTCGCGGATGGCGTTGCGTC
CAATGTGTCGCTGCGGATGTCGGCAGCCAGGCCCTGGATGGCGTGGTGTC
CAATGTGTCGCTGCGGATGTCGGCAGCCAGGCCCTGGATGGCGTGGTGTC
CAATGTGTCGCTGCGGATGTCGGCAGCCAGGCCCTGGATGGCGTGGTGTC
GGACCTGTCGCTGCTGATGTCGGTGTTCAGGTCCTGGATTGCGCTGCGTC
CGATGCATCGCCACTGATGCCGACAGCGGGATCCTGGATGGCGTCG----
CGATGCATCGCCACTGATGCCGACAGCGGGATCCTGGATGGCGTCG----
CAACGCACCTCTACCGATGCCGGCGGCGAGGCCGCGGATGGCGTTGCGTG
CAACGCACCTCTACCGATGCCGGCGGCGAGGCCGCGGATGGCGTTGCGTG
CGATGTATCGTTACTGATGCCGGCAGTCGGGCCCTGGGCGGCGCTGCGTC
CGATGTACCGCTGCCGATGTTGGCGGCCAGGTCCTGGCTGACGTGACGTT
CGACGTACCGCTGCCGATGTTGGCGGCCAGGTCCTGGCTGACGTGACGCT
CGAGTCCTCACTGCTGATTGGGGCGGCCATGTCACACAGGGCTCTGCGTA
CTATCGGCCGCAGTTGATGTCCGCAGTCAGGGCCTCGATGGGGCTGCATC
CGGTGCATCGCTGCTGGTGTCGGCGGCGAGGTCGTGGGTGGTGTTGTGCG
CGGTGCATCGCTGCTGGTGTCGGCGGTGAGGTCGTGGGTGGTGTTGTGCG
CGGTGCATCGCTGCTGGTGTCGGCGGTGAGGTCGTGGGTGGTGTTGTGCG
CACTGTACCGCTGCTGACGTCGGCGGCCAGGGCCTGGGCGGCGCTGCGTC
CACTGTACCGCTGCTGACGTCGGCGGCCAGGGCCTGGGCGGCGCTGCGTC
CAATGTATCGCTGCTGATGCCAGCGGTCATGTTCTGGATGGCGTTACCTC
CGATGCACGGCTGCTGATATCGGCAGTGAGGTCCTGGCCGGCGTCGCGTC
CGCTCCGTCGCTCCTGATGCCGGCGGCCAGGCAGTGGCTGGTGCTGCGTC
CGCTCCGTCGCTCCTGATGCCGGCGGCCAGGCAGTGGCTGGTGCTGCGTC
CGCTCCGTCGCTCCTGATGCCGGCGGCCAGGCAGTGGCTGGTGCTGCGTC
CGATGTATTGCTAC-GATGCCAGCGGTCAGGTTCTGGCTGACGTTGCGTG
CGATGTACCGCTACGGATGTCGGAGGTCGGGTCTTGGATGGGGTGGCGTT
CGATGTATCGCCACTGACTTAGGCGGCGAGGCCCTGAACGGCGCGAGGTC
CGATGTATCGCCACTGACTTAGGCGGCGAGGCCCTGAACGGCGCGAGGTC
CGATGTACCGCTGCCGATGTTGGCGGCCAGGTCCTGGCTGACGTGACGTT
CGAGTCCTCGCTGCTGATGTGGGCGGCCAGGTCGCGGCGGGCGCTGCGTC
TTATTCATCGCTGCTGATGTCGGCGTCCAGGTTGTGGATGGTGTTGCATC
CGAGTCCTCGCTGCTGATGTGAGCGGCCAGGTCGCGGCGGGCGCTGCGTC
CGATGTATCGCTACGGATGTCGGTGGCCACGTTGTGGATGGCGCGCCGTC
CGATGTATCGCTACGGATGTCGGTGGCCACGTTGTGGATGGCGCGCCGTC
CGATGTATCGCTACGGATGTCGGTGGCCACGTTGTGGATGGCGCGCCGTC
TGATGTATCGCTGCTGATGTCGACGATCAGGTCCTGGATGGCGTTGCGCA
CGGTGTATCGCTACTGATGTTGGCGGTCAGGTCCTGGATGACGTTGCATC
CGATGCACCGCTACTGACGATGTCGGTCAGGTCACGCATGGTGTGGCGTC
CGATGCACCGCTACTGACGATGTCGGTCAGGTCACGCATGGTGTGGCGTC
CGATGCACCGCTACTGACGATGTCGGTCAGGTCACGCATGGTGTGGCGTC
TGATGTATCGCTATTGATGTCAGCGGTCAGGCCTTGGATGGCGCGGCTTC
CGATGCACGGCTGCTGATATCGGCAGTGAGGTCCTGGCCGGCGTCGCGTC
CGATGCACGGCTGCTGATATCGGCAGTGAGGTCCTGGCCGGCGTCGCGTC
CGACGTACGGCTGCGCATGCCAGCGGTCGGGTCGTGGATGGCGCTGCGCC
CAACGCACCTCTACCGATGCCAGCGGTGAGGCCGCGGATGGCGTTGCGCG
CAGCGCACCTCTACCGATGCCGGCGGTGAGGCCGCGGATGGCGTTGCGTG
CAGCGCACCTCTACCGATGCCGGCGGCGAGGCCGCGGATGGCGTTGCGTG
CGATGTATCGCTACTGATGCCGGCAGTCGGGCCCTGGGCGGCGCTGCGTC
CG------------------------------------------------
CG------------------------------------------------
CG------------------------------------------------
CGATGTACCGCTACGGATGTCGGCGGTCAGGTCCTGGATGGTGTGGCGCT
CGATGTACCGCTACGGATGTCGGCGGTCAGGTCCTGGATGGTGTGGCGCT
CGATGTACCGCTACGGATGTCGGAGGTCAGGTCTTGGATGGGGTGGTGCT
CGATGTACCGCTGCCGATGTTGGCGGCCAGGTCCTGGCTGACGTGACGTT
CGATGTACCGCTGCCGATGTTGGCGGCCAGGTCCTGGCTGACGTGACGTT
CAATGTATCGCTACTGATGCGGGCGTTCAGGTTGTGGTTAGCGTCTTGTT
CCCTTTACTGCTAACGGTGTCGGCGGCCCGGTCCTGGGCGGCGCTGCGTC
CCCTTTACTGCTAACGGTGTCGGCGGCCCGGTCCTGGGCGGCGCTGCGTC
CCCTTTACTGCTAACGGTGTCGGCGGCCCGGTCCTGGGCGGCGCTGCGTC
CGGTGTATCGCTGCTGACGTCGGCGGCCAGGTCCGGGACGGCGTGGCGTC
CGGTGTATCGCTGCTGACGTCGGCGGCCAGGTCCGGGACGGCGTGGCGTC
CGATGCATTGCTGCTGATGTCGGCGGTTAGGCATTGGACGGCATTTTGAG
CAATGGATCGCTGCTGATATCGGCAGTGGGGTTCCGGATGGTGCCGCGTC
CGACGTATCGCTGCTGATATAGTTGGTCGGGTCTTGGCTGGCGTTACGTC
CGACGTATCGCTGCTGATATAGTTGGTCGGGTCTTGGATGGCATTGCGTC
CGATGCATCGCTGCTGATGTCGGTGCCCAGGTCCTGGATGGCGTTGCGCG
CGATGCATCGCTGCTGATGTCGGTGCCCAGGTCCTGGATGGCGTTGCGCG
CGATGCATCGCTGCTGATGTCGGTGCCCAGGTCCTGGATGGCGTTGCGCG
TGGCTCACCGCTACGGATGTTGGCGGTCAGGTCCTGGATGGCGTTGTGTC
TGGCTCACCGCTACGGATGTTGGCGGTCAGGTCCTGGATGGCGTTGTGTC
CGGTGTATCGCTGCTGACGTCGGCGGCCAGGTCCGGGACGGCGTGGCGTC
CGGTGTATCGCTGCTGACGTCGGCGGCCAGGTCCGGGACGGCATGGCGTC
--------CGCTGCTGATGCCGGCGGTCCTGTCTTGTATGGCGGTGC---
CGATGCATCGCGACTGATGTGGGCGGCCAGGCTCTGCACGGCGCTGCGTC
CGATGCATCGCGACTGATGTGGGCGGCCAGGCTCTGCACGGCGCTGCGTC
CGATGCATCGCGACTGATGTGGGCGGCCAGGCTCTGCACGGCGCTGCGTC
CGATGCATCGCGACTGATGTGGGCGGCCAGGCTCTGCACGGCGCTGCGTC
CGATGCATCGCGACTGATGTGGGCGGCCAGGCTCTGCACGGCGCTGCGTC
CGATGTGTCGCTGCTGATGTCGGCGGTCATGTCGTAGATGGCGCTGCGTC
CGATGTGTCGCTGCTGATGTCGGCGGTCATGTCGTAGATGGCGCTGCGTC
CGATGCACTCCTACGGATGTCAGGGGCCAGGTTCTGTAGAGCGTCTCTCC
CGATGCACTCCTACGGATGTCAGGGGCCAGGTTCTGTAGAGCGTCTCTCC
CGATGCATCGCTGCCGATGTCCGCGCCCA-GTCGTGGATTGCACGGCGTC
CGACGTACGGTGACTAATGCCAGAGGTCAGGGCCTGGATGGCATGGCGTG
CGATGTATCGCTGCTGATATAGTTGGTCGGGTCCTGGATGGCATTGCGTC
CGATGTATCGCTGCTGATATAGTTGGTCGGGTCCTGGATGGCATTGCGTC
CGACGTATTGCTGCTGATATAGTTGGTCGGGTCCTGGATGGCATTGCGTC
CGATGTATCGCTGCTGATATAGTTGGTCGGGTCCTGGATGGCATTGCGTC
CGACGTATCGCTGCTGATATAGTTGGTCGGGTCCTGGATGGCATTGCGTC
CGACGTATCGCTGTTGATATAGTTGGTCGGGTCCTGGATGGCATTGCGTC
CGATTAATCGCCGCTGATGTCGGCGCCCGGGTCCTGGGTGGCGTTACTTT
CGATTAATCGCCGCTGATGTCGGCGCCCGGGTCCTGGGTGGCGTTACTTT
CGATGGATCGCTGTTAGTGTCGGCGGTGATGTCCTGTATAGCGCTGTGTC
TGGTGTATCGCTGCTGACGTCGGCGGCCAGGTCCGGGACGGCGTGGCGTC
CGGTGTATCGCTGCTGACGTCGGCGGCCAGGTCCGGGACGGCGTGGCGTC
CGATGCATCACTGCTGATGTCGGCGGTGAGGGGCTGGATGGCGCCGCGTC
CGATGCATCACTGCTGATGTCGGCGGTGAGGGGCTGGATGGCGCCGCGTC
CGATGCATCACTGCTGATGTCGGCGGTGAGGGGCTGGATGGCGCCGCATC
CGATGCATCACTGCTGATGTCGGCGGTGAGGGGCTGGATGGCGCCGCATC
TGATGCGTTGCTGCTGATGTCGGCGGCTAGGTCGCGGATGGCGCTGCGTT
CGGTGCATCGCTACAGATGCCGGCGACCAGGTCCTGGATGGCGCTGCGTC
CGGTGCATCGCTACAGATGCCGGCGACCAGGTCCTGGATGGCGCTGCGTC
CGATGCATCGCTGCTGATGTCGGCGGTGGGATCTTGGATGGCGTTGCGTC
CGGCTTATCGCTAATGATGTCGGCGGTGGGGTGCTGGATGGCGCTGTGTT
CGGCTTATCGCTAATGATGTCGGCGGTGGGGTGCTGGATGGCGCTGTGTT
CGATGTATCGCCACGGAGGTCGGCGGTCACGTCCAGGACGGCGTGCGTTG
CGATGCATCGCTGCCGATGTCCGCGGCCCAGTCGTGGATTGCACGGCGTC
CGATGCGTCGCTGCTGGTGTCGGATAGCCGGTCCTGGACGGCGTTGCGTC
CGATGCATCTCTGCCGATGTCGGCGGTGAGGCCCTGGATAGCTTGGAGCC
CAATGCATCGCCACTGATGTCAACGGCCGGCTCCTGGATAGCGTTGCATC
CAATGCATCGCCACTGATGTCAACGGCCGGCTCCTGGATAGCGTTGCATC
TGATGTATCGTTACGGGTGTCGGCCGCCAGGTCCAAGATGGCGTTGCGCT
TGATGTATCGTTACGGGTGTCGGCCGCCAGGTCCAAGATGGCGTTGCGCT
TGATGTATCGTTACGGGTGTCGGCCGCCAGGTCCAAGATGGCGTTGCGCT
TGGTATATCGATACCGATATCGGCGGCCGTTTCCTAGATTGCGTCGCACC
CAATGCATCCATACTAAAGTCGGCGATGACGTGCTGGACGGCGTGCAGTC
CGATGTAAGGCTACTGATGCCGA------------------CGGTGCGTC
CGACGTGGCACTGCGGATGTCGGTGGCCAGGTCCTGGACGGCGTTGCGTC
CGATGCGTCGCTGCTGGTGTCGGATAGCCGGTCCTGGACGGCGTTGCGTC
CGATGCGTCGCTGCTGGTGTCGGATAGCCGGTCCTGGACGGCGTTGCGTC
CGATGCGTCGCTGCTGGTGTCGGATAGCCGGTCCTGGACGGCGTTGCGTC
CGATGCGTCGCTGCTGGTGTCGGATAGCCGGTCCTGGACGGCGTTGCGTC
CGATGCGTCGCTGCTGGTGTCGGATAGCCGGTCCTGGACGGCGTTGCGTC
CGATGCGTCGCTGCTGGTGTCGGATAGCCGGTCCTGGACGGCGTTGCGTC
-GGTGCATCGCTGCTGACGGCAGACGTCAGGTCCTGGGCGGCGTGGCGTC
CGATGCACCGCTGCCGATGGCGGCGGTCAGGTCCTCGGCGGCGTGGCGTC
CGATGTATTGCTACTCATGTCGGCGGTCGGGTCCT-TATGGCGTTGCGTC
CGATGCATCGCTGCTGATGGCGGCGGTCAGGTCGTGGATGACGCCGCGTC
CGCTGCATCGCTGCTGATGGCGGCGGTCAGGTCGTGGATGACGCCGCGTC
GAAGTTACATCGATTCATTGCCACTGATAGGTCGCGTAAGGCCTGGAGCA
CGATGTATCGCTACTGATGTCGGCGCTCGGGTTTTGGATGGCGTGGCATC
CGACGTGGCACTGCGGATGTCGGTGGCCAGGTCCTGGACGGCGTTGCGTC
CGACGTGGCACTGCGGATGTCGGTGGCCAGGTCCTGGACGGCGTTGCGTC
CGACGTGGCACTGCGGATGTCGGTGGCCAGGTCCTGGACGGCGTTGCGTC
CGACGTGGCACTGCGGATGTCGGTGGCCAGGTCCTGGACGGCGTTGCGTC
CGGTGCATCGCTGCTGACGGCAGACGTCAGGTCCTGGGCGGCGTGGCGTC
CGGTGCATCGCTGCTGACGGCAGACGTCAGGTCCTGGGCGGCGTGGCGTC
CGGTGCATCGCTGCTGACGGCAGACGTCAGGTCCTGGGCGGCGTGGCGTC
CGGTGCATCGCTGCTGACGGCAGACGTCAGGTCCTGGGCGGCGTGGCGTC
CGGTGCATCGCTGCTGACGGCAGACGTCAGGTCCTGGGCGGCGTGGCGTC
CGATGCATCGCTTCTGATGTCGGAGGTGGGGCCCTGGATGGCGCTGCGTC
CGATGTACCGCTATTGGTGTCGGCGGTGTGGTTCTGGATAGCGTTGCGTC
CGATGTACCGCTATTGGTGTCGGCGGTGTGGTTCTGGATAGCGTTGCGTC
CGATGCATCGCTGCTGATGGCAGCGGTCAGGTCGTGGATGGCGCCGCGTC
CGCTGCATCGCTGCTGATGGCGGCGGTCAGGTCGTGGATGGCGCCGCGTC
CGATGCATCGCTGCTGATGGCAGCGGTCAGGTCGCGGATGACGCCGCGTC
CGCTGCATCGCTGCTGATGGCGGCGGTCAGGTCGTGGATGGCGCCGCGTC
CGATGCATCGCTGCTGATGGCGGCGGTCAGGTCGTGGATGACGCCGCGTC
CGCTGCATCGCTGCTGATGGCGGCGGTCAGGTCGCGGATGGCGCCGCGTC
CAGTGCACCGCTACGGATGCCGGCGGTCAGGTCGCGGATGGCGTTGCGTT
CAGTGCACCGCTACGGATGCCGGCGGTCAGGTCGCGGATGGCGTTGCGTT
CAGTGCACCGCTACGGATGCCGGCGGTCAGGTCGCGGATGGCGTTGCGTT
CGATCTATGACTGCTGGTGTCGGCGGTCAGGCCCTGGATGACGCTGCGGC
CGATGTATCGCTACTGATGTGGGCGCTCGGGTTTTGGATGGCGTGGCATC
CGATGTATCGCTACTGATGTGGGCGCTCGGGTTTTGGATGGCGTGGCATC
CGGTGCATCGCTGCTGATGGCGGTGGTCAGGTTCTGGATGGTGCTGCCTC
CGGTGCATCGCTGCTGATGGCGGTGGTCAGGTTCTGGATGGTGCTGCCTC
CGATGCATCGCTGCTGATGGCGGCGGTCAGGTCGTGGATGACGCCGCGTC
TGATTTGCCGCCACTGGCGTCGGGGACCAGG-CCTGGATGGCGTTGCGCC
CGATTTGCCGCCACTGATGTCGGTGGTCGGGACATGG-------------
CAGTTTGCCGCTA-GGATGCCGGCGGTGAGGCCCTAGATAGCGTCGCGTT
CGATGTGTCGCTGCTGGTGTCGGCGGTGAGGTCCTGGACGGCGTGGCGTC
CGATGCATGGCTGCGGATGCCGGTGGTGCGGTCTCGGATGGTCTCGCCTT
TGATTTATCGCCACTGATCTCGGCGGTGACGTCGTGGATGGCGTGGCGTC
CGATGCATCGCCACTGATGTCAGCGAGCAGGTCGCCGATGGCGTTGCATC
--------------TGATGGCAG-AGCTAGGCCTTGGACGGTCCTGCTTC
CAATTCACCGCTGCTGATGCCGGCGGTCAGCTCCTGGATGGCGTTGCGTC
CAATTCACCGCTGCTGATGCCGGCGGTCAGCTCCTGGATGGCGTTGCGTC
CAATTCACCGCTGCTGATGCCGGCGGTCAGCTCCTGGATGGCGTTGCGTC
CAATTCACCGCTGCTGATGCCGGCGGTCAGCTCCTGGATGGCGTTGCGTC
CAATGTATCGCTGCTGTTGTCAGTAGTGAGGTCCTGGGTGGCGTGGCGTC
CAATGTATCGCTGCTGTTGTCAGTAGTGAGGTCCTGGGTGGCGTGGCGTC
CGATGCATTGCTACTGATGTCGGCAGTGAGGTCGTGGACGGCGCTGCGTC
CGATGCATTGCTACTGATGTCGGCAGTGAGGTCGTGGACGGCGCTGCGTC
CGACGCATTGCTACTGATGTCGGCAGTGAGGTCGTGGACGGCGCTGCGTC
CGACGCATTGCTACTGATGTCGGCAGTGAGGTCGTGGACGGCGCTGCGTC
CGACGCATTGCTACTGATGTCGGCAGTGAGGTCGTGGACGGCGCTGCGTC
CGACGCATTGCTACTGATGTCGGCAGTGAGGTCGTGGACGGCGCTGCGTC
AAATGTATCACTACCAATTTCGGCGCTCCGGTCCTGGACAGCGTTGCGTC
--ATGTTTCGCGACGCATGTCGGGGAGGAGGCCCTGGGTGGCGCCGCGTC
CGATGTTTCGCGACCCATGTCGGGGAGGAGGCCCTGGGTGGCGCCGCGTC
CGATTTCGTGCCACTGAGGTTGACGTTTAGGTCGTGGACGGTGTGGTCTC
CGATGTGTCGCTGCTGGTGTCGGCGGTGAGGTCCTGGACGGCGTGGCGTC
CGATGTGTCGCTGCTGGTGTCGGCGGTGAGGTCCTGGACGGCGTGGCGTC
CGATGTATCGCTACTCCTGTCAGCGGCCAGGTGCTGGATGGCGTGGCATC
CGATGTATCGCTACTCCTGTCAGCGGCCAGGTGCTGGATGGCGTGGCATC
CGATGTATCGCTACTCCTGTCAGCGGCCAGGTGCTGGATGGCGTGGCATC
CGATGCACCGCTGCTGATGCTGGCGGTGTGGGCCTGGATGGCGCAGGGT-
CGATGCACCGCTGCTGATGCTGGCGGTGTGGGCCTGGATGGCGCAGGGT-
CGATGCACCGCTGCTGATGCTGGCGGTGTGGGCCTGGATGGCGCAGGGT-
CGATGTATTGCTATTCATGCCAGTGGGCAGATCCTGGATGGGCGTGGGTC
CGATGTATTGCTATTCATGCCAGTGGGCAGATCCTGGATGGGCGTGGGTC
CGATT-ATCGCTACAGATGGCCGCGGCGACCTCGTGGATGGTGTAGCGTT
CAATGTATCGCTACCGATGTCAGCGGTCAGGTTCTGGACGGCGTTGCGTC
TGAGTCAACGCTACCGATGCTGGTGTTCCGGTGATGGCCGACGCTGCGTC
CGA--CCTCGGCGGTGA-ACAGGCCGCCATCCATACGATAGGCGAAGGTG
CAATTCACCGCTGCTGATGCCGGCGGTCAGCTCCTGGATGGCGTTGCGTC
CGATGCATCGCTACTGATGTCAGCGGTCAGGTCCTGCCTGACGTGGCGTG
CGATGCATTGCTACTGATGTCGGCTGTGAGGTCGTGGACGGCGCTGCGTC
---CGCATTGCTACTGATGTCGGCAGTGAGGTCGTGGACGGCGCTGCGTC
TGATTTGCCGCCACTGGCGTCGGGAGACCAGGCCTGGATGGCGTTGCGCC
CGATGTATGGCTACCGATGTTGGCGGCCATGTCCTGGATGGCGTTGCGTC
CGATGTATGGCTACCGATGTTGGCGGCCATGTCCTGGATGGCGTTGCGTC
CGATGTATGGCTACCGATGTTGGCGGCCATGTCCTGGATGGCGTTGCGTC
CGATGTTTCGCGACCCATGTCGGGGAGGAGGCCCTGGGTGGCGCCGCGTC
CGATGTGTCGCTGCTGGTGTCGGCGGTGAGGTCCTGGACGGCGTGGCGTC
CGATGTATCGCTACTCCTGTCAGCGGCCAGGTGCTGGATGGCGTGGCATC
CCATGTATTGCTTACGATGCCGGCGGTCGTGTCCTGGGTGGTGTTGCGTG
CGATGTATCGCTGCTGATGCCGGCGGTGTAGTCGTGGATGGCGCGGCGT-
CGATGTATCGCTGCTGATGCCGGCGGTGTAGTCGTGGATGGCGCGGCGT-
CGATGTATCGCTGCTGATGCCGGCGGTGTAGTCGTGGATGGCGCGGCGT-
CGATGTATCGCTGCTGATGCCGGCGGTGTAGTCGTGGATGGCGCGGCGT-
CGATGTATCGCTGCTGATGCCGGCGGTGTAGTCGTGGATGGCGCGGCGT-
CG--------------------------------------GCGCAGGAGC
CAATGCAGCGCCACTCATGTCGGCAGTGAGGTCGGGGATGGCGCTGCGTG
CAATGCAGCGCCACTCATGTCGGCAGTGAGGTCGGGGATGGCGCTGCGTG
CG------------------------------------------------
CG------------------------------------------------
CGATGCATCGCCACTGATGCCGGCGTCCGAGCCCTGGGCGGTGCTGCATC
CGATGTACCGCCACTGATGTCGGCGGCGAGGTCTTGGATGGTGCTGCGTC
CGATTCACTGCTGCCGATGCCGGCGGTCAGGTTCTGGATGGCGTTGGACC
CGATTCATTACTGCTGCTG-CGGCGGCCAGGTCCTGGACGGCGTTGGGTC
------------------------GGTCAGGTCGTGGATGGTGTTGCGCC
------------------------GGTCAGGTCGTGGATGGTGTTGCGCC
------------------------GGTCAGGTCGTGGATGGTGTTGCGCC
CGATGTATCGCTACTGATGTCAGCGGTCAGGTTTTGGACGGCGTTGCGTT
--------------------------------------------------
CGGCGCATCGCTTCCGATGTCGGTGGTGGGGCCCTCGATGGCGCTGCGTC
CCATTGTTCAGGACCGATGCTCGCAACAACGTTCTGGATGGCGTCGCG--
CGCTGCATCGCGACGGATGTCGGCTGTCAGGTCCTGGATGGCGTTGCGTC
CTATGTATCACTACTGATGTTGGCCGTCAGGCCCTGGGTGGCGCTGCGTC
CGATTCATTGCTGCTGATGTGGGCGGTCAGGTCCTGGACGGGGATACGTC
CAATTCATCGCTACTGATGTCGGCGGTGCGGTTGTGGGTGGCGTTG----
CGATTCATTGCTGCCGATACCGGCGGTCAGGTAATGGACGGCATGGCGTC
CGCTTCATCGCTGCTCATGCCGGCAGCCATGCCGTGGATGGCGTTGCGTC
CGCTTCATCGCTGCTCATGCCGGCAGCCATGCCGTGGATGGCGTTGCGTC
CGCTTCATCGCTGCTCATGCCGGCAGCCATGCCGTGGATGGCGTTGCGTC
CGCTTCATCGCTGCTCATGCCGGCAGCCATGCCGTGGATGGCGTTGCGTC
CGCTTCATCGCTGCTCATGCCGGCAGCCATGCCGTGGATGGCGTTGCGTC
CGGTGCATCGCCACGGATGTCGGCGGTCAGGTCCTGGAGAGGGGTGCATC
CGGTGTATCTCGATGGATAACGGCGGTCAGGGCCT-GATGGC-----TTC
CGTTTCGTCGCTACTGATGTCGGCGGTGAGGTCCTGGACGGCGTTGAGCT
CGCTGCGTCGCGACGGATGTCGGCTGTCAGGTCCTGGATGGCGTTGCGTC
AGATGCGCCCCTACTGACGTCGGCGATGCGACCCTGGATGGCGTTGCGTC
AGATGCGCCCCTACTGACGTCGGCGATGCGACCCTGGATGGCGTTGCGTC
CGATGCATTACCACGGATGGCGGTGGCCAGGCCCTGGACGGCGTTGCGCC
CGATGCATTGCCACGGATGGCGGTGGCCAGGCCCTGGACGGCGTTGCGCC
CGATGCATTGCCACGGATGGCGGTGGCCAGGCCCTGGACGGCGTTGCGCC
CGATTCACTGCTGCCGATGCCGGCGGTCAGGTTCTGGACGGCGTTGAACC
CGATTCACTGCTGCCGATGCCGGCGGTCAGGTTCTGGACGGCGTTGAACC
CGATGCATTGCTACTGATGCCGGCAGTCAGATCCTGGATGGCGCTGCGTC
CGATGCATTGCTACTGATGCCGGCAGTCAGATCCTGGATGGCGCTGCGTC
CGATGCATTGCTACTGATGCCGGCAGTCAGATCCTGGATGGCGCTGCGTC
CGCTTCATCGCTGCTCATGCCGGCAGCCATGCCGTGGATGGCGTTGCGTC
TGATGCATCGCCACTGATGTCGGCGGTCAGGTGCTGTGCAGTGTTGCGTC
TGATGCATCGCCACTGATGTCGGCGGTCAGGTGCTGTGCAGTGTTGCGTC
CGATGCGTAGCCACTGATGTCGGCGGTGAGGTCCTAGATAATGTTGCGCC
TGACTCACTGCCACTGATGTCGGCGGCCAGCTCATGGACGGTGTTCTGCG
CAATGTATCGCTGCTGATGTCGGCAGTCAATCCGTGAATGGTGCTGCGTT
CGGCGCATCGCTTCCGATGTCGGTGGTGGGGCCCTCGATGGCGCTGCGTC
CGGTGTGTCGCTGCTGATGTCGGCTCTCAGGCCCTGGATGCGTTTGCGTC
CGGTGTGTCGCTGCTGATGTCGGCTCTCAGGCCCTGGATGCGTTTGCGTC
CGGTGTGTCGCTGCTGATGTCGGCTCTCAGGCCCTGGATGCGTTTGCGTC
CGACTTGTCGCTGCTTATGGCAGCGGGCACGTCCTGGATGGCG-TGCGTT
CGACTTGTCGCTGCTTATGGCAGCGGGCACGTCCTGGATGGCG-TGCGTT
CGACTTGTCGCTGCTTATGGCAGCGGGCACGTCCTGGATGGCG-TGCGTT
CGGCTTACCGCTACTGCTGTCGGCGGCCGTGTCCTGGATGGCG-------
CGGCTTACCGCTACTGCTGTCGGCGGCCGTGTCCTGGATGGCG-------
CGGCTTACCGCTACTGCTGTCGGCGGCCGTGTCCTGGATGGCG-------
CGGCTTACCGCTACTGCTGTCGGCGGCCGTGTCCTGGATGGCG-------
CGATTCGCCGCCACTGATGTCTGCGGCCGTGTCCTGGATGGCATTGCATT
CGGCGCATCGCTACTGCTGTCGGTGGTGAGGCCCTGGAAGGCGTTGC-TC
CGTTTCGTCGCTACTGATGTCGGCGGTGAGGTCCTGGACGGCGTTGAGCT
CGCTGCATCGCGACGGATGTCGGCTGTCAGGTCCTGGATGGCGTTGCGTC
CGCTGCGTCGCGACGGATGTCGGCTGTCAGGTCCTGGATGGCGTTGCGTC
CGCTGCGTCGCGACGGATGTCGGCTGTCAGGTCCTGGATGGCGTTGCGTC
CGCTGCGTCGCGACGGATGTCGGCTGTCAGGTCCTGGATGGCGTTGCGTC
CGCTGCATCGCGACGGATGTCGGCTGTCAGGTCCTGGATGGCGTTGCGTC
CGATGTCCGACTGCTGACGTCGGCGGCGCGGTCCTGGATGGCGTTGTGCT
CGATGTCCGACTGCTGACGTCGGCGGCGCGGTCCTGGATGGCGTTGTGCT
CGATGTCCGACTGCTGACGTCGGCGGCGCGGTCCTGGATGGCGTTGTGCT
CGATGTCCGACTGCTGACGTCGGCGGCGCAGTCCTGGATGGCGTTGTGCT
CAATGTATCGCTACGGATAACGACGGTCAGGCCCTGTATGGCGTTGCGGT
CGATTGGTCGCTACCGGCGTCGGCGGGCAGGTGCCGGATGGCGCTGCGCC
CGATTGGTCGCTACCGGCGTCGGCGGGCAGGTGCCGGATGGCGTTGCGCT
CGATTGGTCGCTACCGGCGTCGGCGGGCAGGTGCCGGATGGCGCTGCGCC
CGATTGGTCGCTACCGGCGTCGGCGGGCAGGTGCCGGATGGCGCTGCGCC
CGATTGGTCGCTACCGGCGTCGGCGGGCAGGTGCCGGATGGCGCTGCGCC
TGGCGAATCGCTAGGGATATCGGCGTTCATGTCCTGGATGGGGTGGCGTC
TGGCGAATCGCTAGGGATATCGGCGTTGATGTCCTGGATGGGGTGGCGTC
GGATGCATCGCT---GCTGTTGGCGGATAGGTTCTGGATGGCGTGGCGTC
---------------------------CAGGTTCTGGATGGCATGGCGCC
CGGTGCATCGCTACTGATGTCGGCTTTGAAGCCCTGGACGGCGTGGCGTC
------------------------GGTCAGGTCGTGGACGGCGTGGTGCC
CGATTCAGCGGTACCGATGTCGGC-CTGAGGTCGTGGATGGCGCTGCGTC
CGATTCAGCGGTACCGATGTCGGC-CTGAGGTCGTGGATGGCGCTGCGTC
CGATTCAGCGGTACCGATGTCGGC-CTGAGGTCGTGGATGGCGCTGCGTC
CGATGTATCGCTACTGTTGTTGGGGGTCAGGTCGTCGATGGCATGGCGTC
------------------------GGTCAGGTCGTGGACGGCGTGGTGCC
CGGTGCATCGCTAGGGATGCTTGTGGTCAGGTCCTGGATGGTGCTGCGCC
CAATGTGCCGCTAGGGATGCTTGTGGTCAGGTCCTGGATGGTGCTGCGCC
CAATGTGCCGCTAGGGATGCTTGTGGTCAGGTCCTGGATGGTGCTGCGCC
--------------------------------------------------
--------------------------------------------------
CAATGTGCTACTGCGGATGTC------------------GGCGTTGCGTC
CAATGCATCCCCGCTGATGTCGGAGGCCATGTCCTGGTGAGCATGGCGTC
CAATGCATCCCCGCTGATGTCGGAGGCCATGTCCTAGTGAGCATGGCGTC
CAATGCATCCCCGCTGATGTCGGAGGCCATGTCCTGGTGAGCATGGCGTC
CAATGCATCCCCGCTGATGTCGGAGGCCATGTCCTGGTGAGCATGGCGTC
CAATGCATCCCCGCTGATGTCGGAGGCCATGTCCTGGTGAGCATGGCGTC
CAATGCATCCCCGCTGATGTCGGAGGCCATGTCCTGGTGAGCATGGCTTC
TGGCGAATCGCTAGGGATATCGGCGTTCATGTCCTGGATGGGGTGGCGTC
CGATGTATTGCTACTTATGTCTGCTGTCAGGTCCTGGATGGCGTGGCGTC
CGACCTACCGCTGCCGATGTTGGCGGTCAGGTCCTGGATGGCGTCGCGTC
CACTGTATCGCTGCTGATGTCGGTGGTCAGGTCGTCGTTGAAGCTGCGTC
CACTGTATCGCTGCTGATGTCGGTGGTCAGGTCGTCGTTGAAGCTGCGTC
CGATGCGTCCCTGCTGACGTCGGCGGGCAGGTCCTGGATACAGTTGCGCC
CGATGCGTCCCTGCTGACGTCGGCGGGCAGGTCCTGGATACAGTTGCGCC
------------------------GGTCAGGCCCTGGATGGCGCTGCGTC
---ATTATCGCTGCGGTTGTCCGCGGTCAGGCCCTGGATGGCGCTGCGTC
CGAATTATCGCTGCGGATGTCCGCGGTCAGGCCCTGGATGGCGCTGCGTC
CGATGCACCGCTACGGATGTCGGCGGTCAGGTCCTGGATGAGGTGGCGTC
CAATGCATGGTTACTGATGCTGGCGGCCAGGCCGTGGATGGCGTTGCATT
CGATGCATCGCTACGGATGCCGGCTGCCAGGCCCTGGACAGCGTGGCATT
CAATGTATTGCTGCTGCTGCCGGCGGTCAGGCACTGAATGATGTTGCATC
CGATGCATTGTCACAGATGCCGGCGGTCAGGTCTTGGAGAGCGTAGCGTC
CGATGTATCGCTACGGGTGTCGGCGGTCCGGTCGTGGATGTTGTTGCGTC
CGATTCACTGCTACTGATGCCAGCGGCGAGGTCCT--ATGGCGTTGCGCT
CGATTCAGCGGTACCGATGTCGGCCTCGAGGTCGTGGATGGCGCTGCGTC
CGATTCAGCGGTACCGATGTCGGCCTTGAGGTCGTGGATGGCGCTGCGTC
CGATGTATCGCTAGGGATGTCGGCGGCGGGGTCCTGGATGGCCTTGCGTT
TGATGAATCGCTAGGGATGCCGGCGGTCAGGACCTGGATGGCAGTGCGTC
CGATGTATCGCTGCTGCTGTCGGCGGTGATGTCCTGGATAGCGTTGTTTC
CGATGTATCGCTGCTGCTGTCGGCGGTGATGTCCTGGATAGCGTTGTTTC
CGATGCATCGCAACGGATGTCGGCGGCGAGGCTGTGGATGATGGTGCGTC
CGATTCATCGCCACTGACACCGGCAGTCAGGTCCTGGATGGCGTTGCGTT
CGATTCATCGCCACTGACACCGGCAGTCAGGTCCTGGATGGCGTTGCGTT
CGATTCATCGCCACTGACACCGGCAGTCAGGTCCTGGATGGCGTTGCGTT
CGATGCATCGCTGCTCATGTCGTCGGTGAGGCTCTGGACGGCGTTGTGTG
CGATGCATCGCTGCTCATGTCGTCGGTGAGGCTCTGGACGGCGTTGTGTG
----------------------------AGGTCCTGGATGGCGCTGCGTT
TGATTTATCGCTACTGATGCCGGCGGTGAGGTCCTGGATGGCGCTGCGTT
TGATTTATCGCTACTGATGCCGGCGGTGAGGTCCTGGATGGCGCTGCGTT
CGATGCATCACTGCCGATGCCGGCAGTCAGGTCCTGGATTGCGATGCGTC
CG-----------------------------------------ATGCGTC
--------------------CGGCGGCCGGGCCCCGAATGGCGTTGCCTC
-----------------------------------GGAAGGCGTTGTGCC

GGAGCGTCCTGCTGCAGCACACATGCTGGTGCCATCTGTGCGATGGGCAG
GGTGCGATCTGCGACAGTGCACACATTTGTGTCATCCACATGTTAGGCAA
GGTGCGACCCGCGACAGGGAACACGTTCATGCCATCCACACGATAGGCAA
GGAGCGACCTGCCACAGCGAACATGCCTGTGCCATCCACATGATAGGCGA
AGATCGAGCCGTGACAGCGAACATGCTTGTGCCATCCACATGTTGGGCAA
GAACCTACCTGCGGCAGCGATCGCGTTTCTATCATTTATATGATATGCAG
GGAGCGACCTGCGGCGGGGGAGAGGTTCGCAGGATCCACATGATGGGTAA
GGAGCGGCCCGCGACAGTGGGCAGGACTGTGCCATCCATATGCTGAGCAG
CGATCAGCCTGCAACCGTGTTAGCGTCTGCGCCATCGATGTTATAGGCAA
GGAGCGACCTGCGGCCGTGCGCGCGTTTATATCGTCGATATGGTAGGCAC
GGAGGGATCCCCGACAGTGGACACGCTTGTACGACTCGTGTGATGGGCAG
GGAGCGACCTGCGGCACTGCGCACGCGTGTGCCATCCATATGATGGGCAC
GCAGCAGATGCCGGCGGTGAACATGCGTGCGCCATCCATATGATGGGCAA
GGAGCGACCTGCGTCTGTACGCACGCTTGTGCCATCCCTATGATAGGCGG
GGAGCGGCCTGTCACGGTGGGCACGTTTGTGCCATCCATGTGGTGGGCAG
GGAGCGGCATGCGACCGTGAACACGTTTGCACGATTCGTATGATGGGTGC
--------------------------------------------------
CGAGCCACCCGCGACAGTGAGCACGCTTGCACCGTCCGTGCGATGGGCGG
CGAGCCACCCGCGACAGTGAGCACGCTTGCACCGTCCGTGCGATGGGCGG
CGAGCCACCCGCGACAGTGAGCACGCTTGCACCGTCCGTGCGATGGGCGG
CGAGCCACCCGCGACAGTGAGCACGCTTGCACCGTCCGTGCGATGGGCGG
GGTGCCACCCGCGACAGTGCGCACGCTTGCACTGTCCATATGATGGGCAG
GGTGCCACCCGCGACAGTGCGCACGCTTGCACTGTCCATATGATGGGCAG
GGTGCCACCCGCGACAGTGCGCACGCTTGCACTGTCCATATGATGGGCAG
-GAGAGA--TGTGTGATGCGGATTGCTTGTA-TGCCCC------------
------------------GAACATGCGTGCGCCATCCATATGATGGGCAA
GGGGCGACGCGCGGCGGTGGGCGTGTTTGCGCCCTCCGTATGGTAGGCGG
GGGGCGACGCGCGGCGGTGGGCGTGTTTGCGCCCTCCGTATGGTAGGCGG
GAAGCCACCTGAGTCGGTGCACGCGTTTGAGCCATCCACGCCATAGGCAG
GAAGCCACCTGAGTCGGTGCACGCGTTTGAGCCATCCACGCCATAGGCAG
GGAGTGGCCTGCGACACTGCACACGTCTGTGCCATCCACGTGATGGGCAG
GGAGTGGCCTGCGGCAGTGAGCACGTCTGTGCCATCCACGTGATG-----
GGAGTGGCCTGCGGCAGTGAGCACGTCTGTGCCATCCACGTGATG-----
GGGGTGGCCTGGGGCAGTGGGGGCGTTT-TGCCATTCGTGTGAGGGGCAG
GGAGCTGGCTGCCACGGTGGACGCGTTTGCACGATTTATACAAGGGGCAC
GGAGCTGGCTGCCACGGTGGACGCGTTTGCACGATTTATACAAGGGGCAC
-------GCTGCGACAGTGCGCGCGTCTGTGCTACCCATGTGCTGGGCAG
------ACCGGCGGCCGTGCACACGCTTGTACGATCCATATGACGGGCGA
------ACCGGCGGCCGTGCACACGCTTGTACGATCCATATGACGGGCGA
------ACCGGCGGCCGTGCACACGCTTGTACGATCCATATGACGGGCGA
------ACCGGCGGCCGTGCACACGCTTGTACGATCCATATGACGGGCGA
GGTGCGACCTGCGACAGTGCACACGCTTGCACCATCCGTATGATAGGCGA
GGTGCGACCTGCGACAGTGCACACGCTTGCACCATCCGTATGATAGGCGA
GGTGCGACCTGCGACAGTGCACACGCTTGCACCATCCGTATGATAGGCGA
GGTGCGACCTGCGACAGTGCACACGCTTGCACCATCCGTATGATAGGCGA
GGAGCGACCTGCGACCGTGTGAGCGCTTGTGCCATCCATGCGACGGGCCG
GGAGCGACCTGCGACCGTGTGAGCGCTTGTGCCATCCATGCGACGGGCCG
GGAGCGACCTGCGACCGTGTGAGCGCTTGTGCCATCCATGCGACGGGCCG
GGAGCCACCTGCGACAGTAAGTACGCTTGTGCCATCCACATGATGGGCAG
GGAGCCACCTGCGACAGTAAGTACGCTTGTGCCATCCACATGATGGGCAG
GGAACGACCTGCAACCGTGAGCACGTCTGTGCCATCCACATGATAGGCAG
GGAACGACCTGCAACCGTGAGCACGTCTGTGCCATCCACATGATAGGCAG
GGAACGACCTGCAACCGTGAGCACGTCTGTGCCATCCACATGATAGGCAG
GGAGCGACCTGCGACCGTGTGAGCGCTTGTGCCATCCATGCGACGGGCCG
AG-GCGACCTGCCAGGGCGAACACTTCTGCGCCATCCATGTGATGGGTAC
GGAGCGACCCGCGATGGTGAACCCGCTTGTGCCATTTGCATCACAGCGAG
GGAGCGACCTGCAACCGTGTGAGCGCTTGTGCCATCCATGCGACGGGCCG
CGAGCGACCGGCGACAGTGAACGCGTCTGCGCGAGCCGTAGAATAGGCGG
CGAGCGACCGGCGACAGTGAACGCGTCTGCGCGAGCCGTAGAATAGGCGG
GGGGCGACCTGCGACTGTGCACACGCCTGCACACCGTCTGTGATGGGCGA
GGTGCGACGTGCGAGCGGGCATGCGG-GGCAGGGTTCGAGGGACGTGCTA
GGAGCG-CCCGCGACCGCGGACATGTTTGTGGCACCCGTATGACAGGCGA
GGAGCG-CCCGCGACCGCGGACATGTTTGTGGCACCCGTATGACAGGCGA
AGAGCG-CCAGCGACCGCGGACATGTTTGTGGCACCCGTATGACAGGCGA
GGAGCGCCATGCGGC-----------------------------------
GGAGCGCCATGCGGC-----------------------------------
GGGGCGACCTGCGACTGTGCACACGCCTGCACAGTCTGTGTGATGGGCGA
GGGGCGACCTGCGACTGTGCACACGCCTGCACAGTCTGTGTGATGGGCGA
GGGGCGACCTGCGACTGTGCACACGCCTGCACAGTCTGTGTGATGGGCGA
AGAGCG-CCAGCGACCGCGGACATGTTTGTGGCACCCGTATGACAGGCGA
GAAGCGACCTATGACAGTGAACGGGCTTGTGCCATCCAGATGATGGACGA
GCAGCCACCTGCAACAGTGAACGCGCCCGCGTCATCTACATGACAGCCGA
GGCGTG-CCTGCGGCAGTGGACACGCCTGTGCCATTCGTCTGATGAGCAG
GGGGCGATCTGCGGCAGTGAACGCGTTTGCGGTGCTCATCGGATGGGCAA
-GAGCAACCTGCCGCAGCGAGCGCGTCTGTGCCACCCATGCGATGCGCAA
GGAGCGACCTGCGACAGTGAGC-CGCTTGCACCATACAAATCAAGGGAAA
GGAGCGACCTGCGACCGTGAACACGCCCGTGCCATCCATGCGATAGGCCG
GGAGCGACCTGCGACCGTGAACACGCCCGTGCCATCCATGCGATAGGCCG
GGAGCGACCTGCGACCGTGAACACGCCCGTGCCATCCATGCGATAGGCCG
GGAGCGACCTGCGACCGTGAACACGCCCGTGCCATCCATGCGATAGGCCG
GGAGCGACCTGCGACCGTGAACACGCCCGTGCCATCCATGCGATAGGCCG
GGAGCGACCTGCGACCGTGAACACGCCCGTGCCATCCATGCGATAGGCCG
GGGGCGATCTGCGGCAGTGAACGCGTTTGCGGTGCTCATCGGATGGGCAA
GGTCCGACCGGCGACCGCGGCGACGCCTGCGCGGCCCATGTGATGGGCCG
GGGGCGATCTGCGGCAGTGAACGCGTTTGCGGTGCTCATCGGATGGGCAA
GGGGCGATCTGCGGCAGTGAACGCGTTTGCGGTGCTCATCGGATGGGCAA
GGTCCGACCGGCGACCGCGGCGACGCCTGCGCGGCCCATGTGATGGGCCG
GGGGCGATCTGCGGCAGTGAACGCGTTTGCGGTGCTCATCGGATGGGCAA
GGGGCGATCTGCGGCAGTGAACGCGTTTGCGGTGCTCATCGGATGGGCAA
GAAGCGAGCTGCGGCAGTGAACGCGTCGGTGCCCCTCATGTGATGGGCAA
GGGGCGATCTGCGGCAGTGAGCGTGTTTGCGGTGCTCATCGGATGGGCAG
GGCGCAAGCTGCGGCTGCGCACACGTCGGTGTCACCCATGTGATGGACAG
GGCGCAAGCTGCGGCTGCGCACACGTCGGTGTCACCCATGTGATGGACAG
GGAGCGACCGGCGACGGTGAACACGTCTTTGCCATCCACATGATGGGCGA
GGAGCGGCCTGCGGCTGTGAAGGCGCCTGTGCCACCCATATGGTGAGCAG
GGAGCGGCCTGCGGCTGTGAATGCGCCTGTGCCACCCATATGGTGAGCAG
GGAGCGGCCTGCGGCTGTGAAGGCGCCTGTGCCACCCATATGGTGAGCAG
GGAGCGGCCTGCGGCTGTGAAGGCGCCTGTGCCACCCATATGGTGAGCAG
GGAGAGAGCTGCGACTATGCAGACGTTTGTGCCATCTGTGTGGCGAGCAG
GGAGAGAGCTGCGACTATGCAGACGTTTGTGCCATCTGTGTGGCGAGCAG
GGAGAGAGCTGCGACTATGCAGACGTTTGTGCCATCTGTGTGGCGAGCAG
GGAGAGAGCTGCGACTATGCAGACGTTTGTGCCATCTGTGTGGCGAGCAG
GGAGCGGCCTGCGGCTGTGAAGGCGCCTGTGCCACCCATATGGTGAGCAG
GGAGCGGCCTGCGGCTGTGAAGGCGCCTGTGCCACCCATATGGTGAGCAG
GCAGCGACCTGCAGCAGCGAACACGTTCCTATCATTTATATGATGGGCGC
GGAGCGCCCGACGACAGCGAACACGTGTGTGTCATCCATACGATAGGCAA
GGAGCGCCCGACGACAGCGAACACGTGTGTGTCATCCATACGATAGGCAA
--------------------------------------------------
--------------------------------------------------
--------------------------------------------------
--------------------------------------------------
GGGGCGACCGACGGCAGCGAACACGTGTGTGCCATCCATACGATGGGCAA
CGGGCGACCGACGGCAGCGAACACGTGTGTGCCATCCATACGATGGGCAA
GGGGCGACCGACGGCAGCGAACACGTGTGTGCCATCCATACGATGGGCAA
GGGGCGACCGACGGCAGCGAACACGTGTGTGCCATCCATACGATGGGCAA
GGGGCGAGGCTCGACAGTGAACACGTGTGTGCCATCCATACGATGGGCAG
GGGGCGAGGCTCGACAGCGAACACGTCTGCGCCATCCATACGATGGGCAG
GGGGCGAGGCTCGACAGTGAACACGTGTGTGCCATCCATACGATGGGCAA
--------------------------------------------------
GGAGCGACCCACGGCCGTGAAGATGTCTGTGCCATCTATATGATCGGCA-
--------------------------------------------------
GGATCGAGCTGCGACAGCAAATATGCTTGTACCATCCATGTGATAAGCAG
GGAGCGAGTCGAGTCCGTGAGCACGTCTGTGCCATCCGCATGATGGGCGG
GGAGCGACCGGCACCACCGAGCACGCTTGTGTCATCCATATCATGATCAG
GGAGCGACCGGCACCACCGAGCACGCTTGTGTCATCCATATCATGATCAG
GGGGCGGCCTGCGACAGCGAGCACCTCTGCGCCGCCCCTCTGACAGGCGA
GGGGCGGCCTGCGACAGCGAGCACCTCTGCGCCGCCCCTCTGACAGGCGA
AGAGCGAACTGCAGCAATGAACGCGTCTGTGCCACCCACATGACGGGCAG
GGAGAGACCTGCGATAGCGAGCCCGCTTGCACCATCCACATGATGGGCAA
GGGGCGGCCTGCGACAGCGAGCACCTCTGCGCCGCCCCTCTGACAGGCGA
GGGGCGGCCTGCGACAGCGAGCACCTCTGCGCCGCCCCTCTGACAGGCGA
GGGGCGGCCTGCGACAGCGAGCACCTCTGCGCCGCCCCTCTGACAGGCGA
GGAGCGGCCTGAGACAGCGAACACGCTTGTGCCATCCATATCATGGGCAA
GGAGCGGCCTGAGACAGCGAACACGCTTGTGCCATCCATATCATGGGCAA
GGAGCGAGTCGAGTCCGTGAGCACGTCTGTGCCATCCGCATGATGGGCGG
GGAGCGGCCTGAGACAGCGAACACGCTTGTGCCATCCATATCATGGGCAA
GGAGCGGCCTGAGACAGCGAACACGCTTGTGCCATCCATATCATGGGCAA
GGAGCGGCCTGAGACAGCGAACACGCTTGTGCCATCCATATCATGGGCAA
GGAGCGGCCTGAGACAGCGAACACGCTTGTGCCATCCATATCATGGGCAA
GGAGCGGCCTGAGACAGCGAACACGCTTGTGCCATCCATATCATGGGCAA
GGAGCGGCCTGAGACAGCGAACACGCTTGTGCCATCCATATCATGGGCAA
GGAGCGGCCTGAGACAGTGAACACGCTTGTGCCATCCATATCATGGGCAA
--------------------------------------------------
--------------------------------------------------
--------------------------------------------------
--------------------------------------------------
GGAGAGACCTGCGACAGTGCACGCGCCTGTGCCATCCCAACGATGGGCAG
GGGGCGGCCTGCGACAGCGTGGCCGCCTGATCCATCCATATGATAGGCAC
GGGGCGGCCTGCGACAGCGTGGCCGCCTGATCCATCCATATGATAGGCAC
GAAGAGACTCGCAACAGCGAACGTGCATGTGCCATCCATATGATGGGCAG
GGGGCGACCCGCGACCGTGCACACGCCTGTACCGCCCATGTGATGGGCAT
GGGGCGACCCGCGACCGTGCACACGCCTGTACCGTCCATGTGATGGGCAG
GGGGCGACCCGCGACCGTGCACACGCCTGTACCGCCCATGTGATGGGCAG
GGGGCGACCCGCGACCGTGCACACGCCTGTACCGTCCATGTGATGGGCAT
GGGGCGACCCGCGACCGTGCACACGCCTGTACCGCCCATGTGATGGGCAT
GGAGCGACCTGCTGCAGTGCACGCGTCTGACCCACCCGCATGATGGGCAG
GGAGCGACCTGCTGCAGTGCACGCGTCTGACCCACCCGCATGATGGGCAG
-------CCTGCCAGGGCGAACACGCTTCTGCGATCGATATGATGGGCAG
-------CCTGCCAGGGCGAACACGCTTCTGCGATCGATATGATGGGCAG
-------CCTGCCAGGGCGAACACGCTTCTGCGATCGATATGATGGGCAG
-------CCTGCCAGGGCGAACACGCTTCTGCGATCGATATGATGGGCAG
-------CCTGCCAGGGCGAACACGCTTCTGCGATCGATATGATGGGCAG
GGAGCGACGTGCGGCAGTGGGCGCGCTTGTGCTGCCCGCATGCTGGGCGA
GGAGTGGCTTGTCACAGTGCATAGTCCTGGACCATACATGTCATGGACGA
--------------------------------------------------
--------------------------------------------------
GGAGCGACCTGCGCCGAGGCACAGGCTCGTGCCATCCATGTGATGGGCAG
GGAGCGACCTGCGCCGAGGCACAGGCTCGTGCCATCCATGTGATGGGCAG
GGAGCGGCCTGTGACCGTGCACACGCTTGTGCCCCCCATATGATGGGCGA
GGAGCGGCCTGTGACCGTGCACACGCTTGTGCCCCCCATATGATGGGCGA
TGAGAGACCTGCAACAATGAACACGTTTGTGCCATGCATGTTATAGGCAG
GGAGCGACCCGCGACCGTAAATACGCTTGCGCCATCCATATGATAGGCGG
GGAGAGACCTGCGACAGTGCACACACTCGCATCATCCACATGATGGTCAA
GGAGCGACGTGCGGCAGTGGGCGCGCTTGTGCTGCCCGCATGCTGGGCGA
GGAGCGACGTGCGGCAGTGGGCGCGCTTGTGCTGCCTGCATGCTGGGCGA
GGAGCGACGTGCGGCAGTGGGCGCGCTTGTGCTGCCCGCATGCTGGGCGA
GGAGCGACGTGCGGCAGTGGGCGCGCTTGTGCTGCCTGCATGCTGGGCGA
GGAGCGACGTGCGGCAGTGGGCGCGCTTGTGCTGCCCGCATGCTGGGCGA
GGAGCGACGTGCGGCAGTGGGCGCGCTTGTGCTGCCCGCATGCTGGGCGA
GGAGCGACGTGCGGCAGTGGGCGCGCTTGTGCTGCCCGCATGCTGGGCGA
GGGGCGACTTGCAACGGTGAACGCGCTTGCGCCATCCATATGATAGGTGG
GTCGCGA-------------------------------------------
GGAGCGACCTGCGACAGCGAACACGCTTGTGCTATCCGTATGATGG-CAA
GGAGCGACCTGCGACAGCGAACACGCTTGTGCTATCCGTATGATGG-CAA
GGAGCGACCTGCGACAGCGAACACGCTTGTGCTATCCGTATGATGG-CAA
GGAGCAACCTGCGACCGTGAACACGCCTGTGTCATCCACATGATGCGCGA
GGAGCGACCTGCGACAGTGCACACGCTTGCGCCATCCATGTGGTGGGCGA
GGAGCGACCTGCGACAGTGCACACGCTTGCGCCATCCATGTGGTGGGCGA
AGAGCGATCTGCGACAGTGAAGACGCCTTTGCCGTACGCGTGATGAGCGA
GTCGCGACCCGCGACACTGAACACGTCTGTGCCATCCATGTGATGG----
GGAGCGACCTGCGACAGTGCACACGCTTGCGCCATCCATGTGGTGGGCGA
GGAGCGACCTGCGACAGTGCACACGCTTGCGCCATCCATGTGGTGGGCGA
GGAGCGACCTGCGACAGTGCACACGCTTGCGCCATCCATGTGGTGGGCGA
GGAGCGACCTGCGACAGTGCACACGCTTGCGCCATCCATGTGGTGGGCGA
GGAGCGACCTGCGACAGTGCACACGCTTGCGCCATCCATGTGGTGGGCGA
TGAACGACCTGCGGCAGCGTACACGCTTGTGCCATCTGTGTGCTGCGC-A
GGAGCGGCCTGTCACGGTGGGCATGTTTGTGCCATCCATGTGGTGGGCAG
GGAGCGGCATGCGACCGTGAACACGCTTGCACGATTCGTATGACGGGTGC
GGAGCGGCATGCGACCGTGAACACGCTTGCACGATTCGTATGACGGGTGC
GGAGCGGCATGCGACCGTGAACACGCTTGCACGATTCGTATGACGGGTGC
GGAGCGGCATGCGACCGTGAACACGCTTGCACGATTCGTATGACGGGTGC
GGAGCGGCCTGTCACGGTGGGCACGTTTGTGCCATCCATGTGGTGGGCAG
GCGGCGACCTGCGACAGTGAGCACGTCTACACTATGCATATCATGGACGA
AAAGCGACCTGTCTCAGTGAACACACTTGTCGCATCCACATCATGGACAA
--------------------------------------------------
--------------------------------------------------
GGTGCGACCCGCGGCCGTGAAGAAGCTTGCACGATTTGTATGATGGGCAG
GGTGCGACCCGCGGCCGTGAAGAAGCTTGCACGATTTGTATGATGGGCAG
GGTGCGACCCGCGGCCGTGAAGAAGCTTGCACGATTTGTATGATGGGCAG
GGTGCGACCCGCGGCCGTGAACACGCTTGCACGATTTGTATGATGGGCAG
GGTGCGACCCGCGGCCGTGAACACGCTTGCACGATTTGTATGATGGGCAG
GGTGCGACCCGCGGCCGTGAACACGCTTGCACGATTTGTATGATGGGCAG
GGTGCGACCCGCGGCCGTGAAGAAGCTTGCACGATTTGTATGATGGGCAG
GGTGCGACCCGCGGCCGTGAACACGCTTGCACGATTTGTATGATGGGCAG
GGAGCGGCCTGTCACGGTGGGCATGTTTGTGCCATCCATGTGGTGGGCAG
GGAGCGGCCTGTCACGGTGGGCACGTTTGTGCCATCCATGTGGTGGGCAG
GGGGCGACCTGCGACGGTGCACACGTTTGCAC-ATCCACATCATGGGCAC
GGGGCGACCTGCGACGGTGCACACGTTTGCAC-ATCCACATCATGGGCAC
GGGGCGACCTGCGACGGTGCACACGTTTGCAC-ATCCACATCATGGGCAC
GGGGCGACCTGCGACGGTGCACACGTTTGCAC-ATCCACATCATGGGCAC
GGGGCGACCTGCGACGGTGCACACGTTTGCAC-ATCCACATGATGGGCAC
GGGGCGACCTGCGACGGTGCACACGTTTGCAC-ATCCACATGATGGGCAC
GGGGCGACCTGCGACGGTGCACACGTGTGCAC-ATCCACATGATGGGCAC
GGAGCGACCTGCGACCGCGCACACGCCTGTGCCGTCCATGTGATGGGCAG
GGAGCGACCTGCGACCGCGCACACGCCTGTGCCGTCCATGTGATGGGCAG
GGAGCGGCCTGCGACTGTGAGCATGTCTGTGCCATCCATGTGGTGGGCAG
GGAGCGACCTGCGACCGCGCACACGCCTGTGCCGTCCATGTGATGGGCAG
GGAGCGACCTGCGACAGCGCACAC----GCACGATTCATGTGATGGGCAG
GGAGCGACCTGCGACAGCGCACAC----GCACGATTCATGTGATGGGCAG
GCGGCGA-CCGCGACTGTGAGCACGTTTGTGCCATCTATGTGGTGTGCAA
GCGGCGA-CCGCGACTGTGAGCACGTTTGTGCCATCTATGTGGTGTGCAA
GCGGCGACCGGCGACTGTGAGCACGTTTGTGTCATCTATGTGGTGTGCAA
TGACCGA-------------------------------------------
GCGGCGACCGGCGACTGTGAGCACGTTTGTGCCATCTATGTGGTGTGCAA
GGAGCGACATGCGAG-----------------------------------
GGAGCGACATGCGAG-----------------------------------
GGAGCGACATGCGAG-----------------------------------
GGAGCGACATGCGAG-----------------------------------
GGAGCGACATGCGAG-----------------------------------
AGAGAGACCTGCGGCAGTGGACGCGCTAGTGCCGT--CCATGCAAGGCGG
AGAGAGACCTGCGGCAGTGGACGCGCTAGTGCCGT--CCATGCAAGGCGG
AGAGAGACCTGCGGCAGTGGACGCGCTAGTGCCGT--CCATGCAAGGCGG
GCGGCGACCGGCGACTGTGAGCACGTTTGTGTCATATCTATGTTGTGCAA
AGAGAGACCTGCGGCAGTGGACGCGCTAGTGCCGT--CCATGCAAGGCGG
TGGGCGACCTGCGACCGCGAGCACGCTTGTGCTGCCGACATGAAAGCCG-
TGGGCGACCTGCGACCGCGAGCACGCTTGTGCTGCCGACATGAAAGCCG-
TGGGCGACCTGCGACCGCGAGCACGCTTGTGCTGCCGACATGAAAGCCG-
GGGGCGACCTGCGACCGCGAGCACGCTTGTGCTGCCGACATGAAAGCCG-
TGGGCGACCTGCGACCGCGAGCACGCTTGTGCTGCCGACATGAAAGCCG-
---GCGACCGGCGACCGCGGCGACGCCTGCGCGGCCCATGTGATGGGCGC
---GCGACCGGCGACCGCGGCGACGCCTGCGCGGCCCATGTGATGGGCGC
---GCGACCGGCGACCGCGGCGACGCCTGCGCGGCCCATGTGATGGGCGC
---GCGACCGGCGACCGCGGCGACGCCTGCGCGGCCCATGTGATGGGCGC
---GCGACCGGCGACCGCGGCGACGCCTGCGCGGCCCATGTGATGGGCGC
GGAGCAACCCGAGACAGCGAGCATGCCTGCACCACCCATACGATGA-CGA
TGGGCGACCTGCGACCGCGAGCACGCTTGTGCTGCCGACATGAAAGCCG-
GGAGCAGCCCGAGACAGCGAGCACGCCTGCACCACCCATACGATGACCGA
GGAGCAACCCGAGGCAGCGAGCACGCCTGCACCACCCATACGATGA-CGA
GGAGCAGCCCGAGACAGCGAGCACGCCTGCACCACCCATACGATGACCGA
GGAGCAACCCGAGGCAGCGAGCACGCCTGCACCACCCATACGATGA-CGA
GGAGCAACCCGAGGCAGCGAGCACGCCTGCACCACCCATACGATGA-CGA
GGAGCAACCCGAGGCAGCGAGCACGCCTGCACCACCCATACGATGA-CGA
GGAGCAGCCCGAGACAGCGAGCACGCCTGCACCACCCATACGATGA-CGA
GGAGCAACCCGAGGCGGCGAGCACGCCTGCACCACCCATACGATGACCGA
GGAGCAGCCCGAGACAGCGAGCACGCCTGCACCACCCATACGATGA-CGA
GGAGCGACCTGCGACCGCGAGCACGCTTGTGCTGCCGACATGAAAGCCGA
TGGGCGACCTGCGACCGCGAGCACGCTTGTGCTGCCGACATGAAAGCCGA
--------------------------------------------------
--------------------------------------------------
--------------------------------------------------
GGGGCGACCTGCGACTGCGAACAGGCCTGTGCCGTGCACGTGATGGG---
GCGGCAACCTGCGATAGAGACCGCGCTTGTGCCTTCCGTGCGGTAGGTGA
GGGGCGACCTGCGACTACGAACAGGCCTGTGCCGTGCACGTGATGGGCAG
GGGGCGACCTGCGACTGCGAACAGGCCTGTGCCGTGCACGTGATGGGCAG
GGGGCGACCTGCGACTGCGAACAGGCCTGTGCCGTGCACGTGATGGGCAG
GGGGCGACCTGCGACTGCGAACAGGCCTGTGCCGTGCACGTGATGGGCAG
GGGGCGACCTGCGACTGCGAACAGGCCTGTGCCGTGCACGTGATGGGCAG
GGGGCGACCTGCGACTGCGAACAGGCCTGTGCCGTGCACGTGATGGGCAG
GGAGCGGCCTGCGACAGTGCACAAGCTTATGTTACCCATGGGATAGACAA
GGAGCGGCCTGCGACAGTGCACAAGCTTATGTTACCCATGGGATAGACAA
GGAGCGACCTGCGACGGTGAGCACGCTTGTGCCGTCTATGTGATGG-CGA
GGAGCGACCTGCGACGGTGAGCACGCTTGTGCCGTCTATGTGATGG-CGA
GGAGCTGTCTGCGACAGTGCACACGTCTGAGCCATTCACATGATAGGCAG
GGAGCTGTCTGCGACAGTGCACACGTCTGAGCCATTCACATGATAGGCAG
GGAGCTGTCTGCGACAGTGCACACGTCTGAGCCATTCACATGATAGGCAG
GGGGCGACCTGCGACTGCGAACAGGCCTGTGCCATCCACGTGATGGGCAG
GGGGCGACCGGTGACAGTGAGTGC----GCATCATCCACCTGATGGGCAG
GGGGCGACCGGTGACAGTGAGTGC----GCATCATCCACCTGATGGGCAG
GGAGCGGTCTGCGACTGTGCACGCGCTTGCGTCATGGGCATGCTCGTCAG
GGAGCGGTCTGCGACTGTGCACGCGCTTGCGTCATGGGCATGCTCGTCAG
GGAGCGGTCTGCGACTGTGCACGCGCTTGCGTCATGGGCATGCTCGTCAG
GGAGCGGTCTGCGACTGTGCACGCGCTTGCGTCATGGGCATGCTCGTCAG
--------------------------------------------------
--------------------------------------------------
--------------------------------------------------
--------------------------------------------------
GGAGCGACCCGCGATGGTGAACCCGCTTGTGCCATTTGCATCACAGCGAG
GGAGCCACCGGCGACTGTGAACGCATTTGTGCCATCCTTGTGATGGGCGA
GGTGCCACCGGCGACTGTGAACGCATTTGTGCCATCCTTGTGATGGGCGA
GGGGCGACCTGTGAGAGCGAGCATATTTGTGCCATCCGTATGATGGCTAG
GGGGCGACCTGTGAGAGCGAGCACATTTGTGCCATCCGTATGATGGCTAG
GGGGCGACCTGTGAGAGCGAGCATATTTGTGCCATCCGTATGATGGCTAG
GGGGCGACCTGTGAGAGCGAGCATATTTGTGCCATCCGTATGATGGCTAG
GGAGCGATCTGCGACTGTGAACACGACTGTGCCATCCATATGGTAGACAG
GGAGCGATCTGCGACTGTGAACACGACTGTGCCATCCATATGGTAGACAG
--------------------------------------------------
--------------------------------------------------
--------------------------------------------------
--------------------------------------------------
--------------------------------------------------
GGAGCCACCTGCGACAGCGAATACGTCTGTGCCATCCGCCTGATGGGCGC
GGAGCCACCTGCGACAGCGAACACGTCTGTGCCATCCGCCTGATGGGCGC
GGAGCCACCTGCGACAGCGAACACGTCTGTGGCATCCGCCTGATGGGCGC
GGAGCCACCTGCGACAGCGAACACGTCTGTGCCATCCGCCTGATGGGCGC
GGAGCCACCTGCGACAGCGAACACGTCTGTGCCATCCGCCTGATGGGCGC
GGAGCCACCTGCGACAGCGAACACGTCTGTGCCATCCGCCTGATGGGCGC
AGAGCGAGCTGCGACAGTGCCGACGTGTGCGCCATCC--ATGATGGGCAA
AGAGCGAGCTGCGACAGTGCCGACGTGTGCGCCATCC--ATGATGGGCAA
AGAGCGAGCTGCGACAGTGCCGACGTGTGCGCCATCC--ATGATGGGCAA
AGAGCGAGCTGCGACAGTGCCGACGTGTGCGCCATCC--ATGATGGGCAA
GGCG----------------------------------------------
GGTGCGAACAGCAACGGCGAACACGCTTTTACAGTTTATATCATGGGCGA
GGAGCGACCTGGGTCAGCGAACACGTCTGCGCCATCCATATGATAGGCAG
--------------------------------------------------
--------------------------------------------------
GGCGCCACCTGCGACCGTGGACACGTGTGCGGC-TG-ATATGATGGGCGA
GGCGCCACCTGCGACCGTGGACACGTGTGCGGC-TG-ATATGATGGGCGA
ACAGCGACCTGCGACAGTGCACGTGCTTGCAGCATGCATATGGTAGGCAG
ACAGCGACCTGCGACAGTGCACGTGCTTGCAGCATGCATATGGTAGGCAG
ACAGCGACCTGCGACAGTGCACGTGCTTGCAGCATGCATATGGTAGGCAG
GGAGCGACCTGGGTCAGCGAACACGTCTGCGCCATCCATATGATAGGCAG
GGAGCGACCTGGGTCAGCGAACACGTCTGCGCCATCCATATGATAGGCAG
GGAGCGACCTGGGTCAGCGAACACGTCTGCGCCATCCATATGATAGGCAG
GGCGCCACCTGCGACCGTGGACACGTGTGCGGC-TG-ATATGATGGGCGA
GGAGCGACCTGGGTCAGCGAACACGTCTGCGCCATCCATATGATAGGCAG
GGAGCGACCTGGGTCAGTGAACACGTCTGCGCCATCCATATGATAGGCAG
GGAGCGGGCTGCCACAGTGAGCACGCGTGTACCATCCATATGATG--CTC
GGAGCGGCCTGCTACAGTGCACAAGCTTGTGCCATCCATATGATAGGTAG
--------------------------------------------------
GGAGTGGCCTGCGACAGTGAG-GCATCTTCGCCATCCACGTAATGGGTAG
GGAGTGACCCGCGACAGTAAG-GCATCTTCGCCATCCACGTAATGGGTAG
GGAGTGACCCGCGACAGTGAG-GCATCTTCGCCATCCACGCAATGGGTAG
GGAGTGACCCGCGACAGTGAG-GCATCTTCGCCATCCACGTAATGGGTAG
--------------------------------------------------
--------------------------------------------------
--------------------------------------------------
------ACCGGCAACAGTGCACACGCCTGTGCCCTCCATGTGCTAGGCAG
--------------------------------------------------
--------------------------------------------------
--------------------------------------------------
------ACCGGCAACAGTGCACACGCCTGTGCCCTCCATGTGATAGGCAG
GGAGTGGCCTGCGACAGTGAG-GCATCTTCGCCATCCACGCAATGGGTAG
GGAGTGACCCGCGACAGTGAG-GCATCTTCGCCATCCACGCAATGGGTAG
GGAGTGGCCTGCGACAGTGAG-GCATCTTCGCCATCCACGTAATGGGTAG
GGAGTGGCCTGCGACAGTGAG-GCATCTTCGCCATCCACGTAATGGGTAG
GGAGCCACCCGCGACAGCGAACACGTGTGCACCATGCGTATGATAGGCAG
GGAGCCACCCGCGACAGCGAACACGTGTGCACCATGCGTATGATAGGCAG
GGAGAGACCTGCCACAGTGAATACGTGTGTGCCACCCATGTGATGGGCGA
GGAGAGACCTGCCACAGTGAATACGTGTGTGCCACCCATGTGATGGGCGA
AAAGCGAGCTGAGACAGTGAGCACGCCTGTACCATTCATGTGATGGGCAG
GGATCGACCTGCGCCAGTGAGCACGTCTGTGCCATCCGCGTGATGGGCCG
GGAGTGGCCTGCGACAGTGAGGCAATCTTCGCCATCCACGTAATGGGTAG
GGAGCGACCCGCGACAGTGAGCACGTTTGCATGCTCCATACGGTGAGCGA
GGAGCGACCCGCGACAGTGAGCACGTTTGCATGATCCATACGGTGAGCGA
GGAGCGACCCGCGACAGTGAGCACGTTTGCATGCTCCATACGGTGAGCGA
AGAGTGACCT----------------------------------------
GGGGCGGCGTGTGACAGCTCACGCGTATGTGTCATTGATGTGCGTGTCAA
GACGCGACCTGCCACAGTGAAGGCGTTTCTATCATTTATATGATAGGCAG
GGCGATACCTGCGACCGTGAGCCCGCTTGCACGGTCCGTGCGAGGGGCAG
GGCGATACCTGCGACCGTGAGCCCGCTTGCACGGTCCGTGTGAGGGGCAG
GGCGATACCTGCGACCGTGAGCCCGCTTGCACGGTCCGTGTGAGGGGCAG
GGGGCGGCGTGTGACAGCTCACGCGTATGTGTCATTGATGTGCTGT-CAA
GGGGCGGCGTGTGACAGCTCACGCGTATGTGTCATTGATGTGCTGT-CAA
GGGGCGGCGTGTGACAGCTCACGCGTATGTGTCATTGATGTGCTGT-CAA
GGAGCGGACTGCGACAGTGC----GCTTGCAGCAT-GTTA---TGGGCAA
GGCGTTGCCTGCGGCAGTGGACACGCCTGTGCCATTCGTCTGATGAGCAG
CGAGAGACTCTCGACAGCGGACTCGTTTGCACCATCCACACGAGCGGCAG
TAAGAGACCTGCCACAGTGGACGCATTTGCACCACCCATATGATGGGGAG
GGAGCTGCCTGCAATAGTGAGCTGGCTTGTGTCATCGATGTGGTGGGCGA
GGCGCTACCTGCGACGGTGAACGCGTTTCCGTCATTGATGTGATGGGCAG
GGCGCTACCTGCGACGGTGAACGCGTTTCCGTCATTGATGTGATGGGCAG
GGCGCTACCTGCGACGGTGAACGCGTTTCCGTCATTGATGTGATGGGCAG
GGCGCTACCTGCGACGGTGAACGCGTTTCCGTCATTGATGTGATGGGCAG
GGAGCTGCCTGCAATAGTGAGCTGGCTTGTGTCATCGATGTGGTGGGCGA
GGAGCGGCCCGCAACAGTGCACAGGTCTGTGCCATCCGTGTGATGGGCAG
GGAGCGGTCAGCGACAGTGAACACCCTGGTGCTATCCACGCGATGGACAG
-------------------------------CCATTCATGCGATAGGCAG
TGAGCGACCTGCCGCAGCGAGCACGCCTGTGCCATACATACGGTAGGCGA
TGAGCGACCTGCCGCAGCGAGCACGCCTGTGCCATACATACGGTAGGCGA
GGAGCGACCTGCGACAGCGCACACGTCCGTACCGTCCACATGATGGGCAG
GGAGCGGCCTGCGACCGTGAACACGCTTGTCCCATCCACATGCTAGAAAG
GGAGCGGCCTGCGACCGTGAACACGCTTGTCCCATCCACATGCTAGAAAG
GGAGCGGCCTGCGACCGTGAACACGCTTGTCCCATCCACATGCTAGAAAG
GGA-CCACCCGCGACAGCGAGCACGTCGGTGCCACCCACATGGCGGGCAG
GGA-CCACCCGCGACAGCGAGCACGTCGGTGCCACCCACATGGCGGGCAG
GGAGCGAACCGCGACAGTGAGCACGCTTGCGCTATCCACATGATGGGCAG
---GCGACCTGCGACAGCGAGCACGCTTGTGCCATCCATGTGATGGGCGA
---GCGACCTGCGACAGCGAGCACGCTTGTGCCATCCATGTGATGGGCGA
GGAGCGACACGCGGCAGAGAGCACGCTTGTGCCATCCATGTGGTAGGCAG
GGAGCGACACGCGGCAGAGAGCACGCTTGTGCCATCCATGTGGTAGGCAG
GGGGAGACCCGCGACAGTGAGCACGCTTGTGCCATCCACATGATGTGCGG
AAAGCGACCCGCAGCAGTGAACACGTCAAGGCCATTTCTGTGATAGGCAG
GGGGAGACCCGCGACAGTGAGCACGCTTGTGCCATCCACATGATGTGCGG
AGAGAGGCCTGCAACAGCGAACACGTGTACGCCATGCATATGATGGGCAG
GGAGCGGCCTGCAACCGCGTACACGTCTGCGCCATCCATATGATGGGCAG
GGAGCGGCCTGCAACCGCGTACACGTCTGCGCCATCCATATGATGGGCAG
GGAGCGACCTGCGACAGCGCACACGTCCGTACCATCCACATGATGGGCAG
GGAGCGACCTGCGACAGCGCGCACGTCCGTACCATCCACATGATGGGCAG
GGAGCGACCTGCGACAGCGCACACGTCCGTACCGTCCACATGATGGGCAG
GGAGCGACCTGCGACAGCGCACACGTCCGTACCGTCCACATGATGGGCAG
GGAGCGGCCTGCGACAGCGCACGCGTCTGTGCCACACATGTGGTGGGCAG
GGAGCGGCCTGCGACAGCGCACGCGTCTGTGCCACCCATGTGATGGGCAG
GGAGCGGCCTGCGACAGCGCACGCGTCTGTGCCACCCATGTGGTGGGCAG
GGAGCGGCCTGCGACAGCGCACGCGTCTGTGCCACACATGTGGTGGGCAG
GGAGCGGCCTGCGACAGCGCACGCGTCTGTGCCACCCATGTGGTGGGCAG
GGAGCGGCCTGCGACAGCGCACGCGTCTGTGCCACCCATGTGGTGGGCAG
GGAGCGGCCTGCGACAGCGCACGCGTCTGTGCCACCCATGTGGTGGGCAG
GGAGCGGCCTGCGACCGTGAACACCTTTGTCCCATCCACATGCTAGAAAA
GGAGCGGCCTGCGACAGCGCACGCGTCTGTGCCACCCATGTGGTGGGCAG
GGAGCGTCCTGCTACAGCACACACGCTGGTGCCATC--TGTGATGGGCAG
GGGGCGACCTGCGGCAGTGCTCACGCTTGTGCCATGCAGGTGATGGGCGA
GGGGCGACCTGCGGCAGTGCTCACGCTTGTGCCATGCAGGTGATGGGCGA
GGGGCGACCTGCGACAGTGAACACGCTTGCAACATTCACATGATGGGTAG
GGAGCGACCTGCGACGGCGAGCACGCTTGTGCAACCCATATGATAGGCAG
GGAGCGACCTGCGACGGCGAGCACGCTTGTGCAACCCATATGATAGGCAG
GGAGCGACCTGCGACGGCGAGCACGCTTGTGCAACCCATATGATAGGCAG
GGAGCGACCTGCGACGGCGAGCACGCTTGTGCAACCCATATGATAGGCAG
GGAGCGTCCTGCTACAGCACACACGCTGGTGCCATC--TGTGATGGGCAG
GGAGCGTCCTGCTACAGCACACACGCTGGTGCCATC--TGTGATGGGCAG
GGAGCGTCGTGCTACAGCACACACGCTGGTGCCATC--TGCGATGGGCAG
GGAGCGTCCTGCTACAGCACACACGCTGGTGCCATC--TGTGATGGGCAG
GGAGCGACCTGAGACAG---------------------------------
GGAGCGTCAGGCGACAGTGAACACGCTTGTACCACACACACCATGATCAA
GGAGAGACCCGCGATCGTGAACGTATTTGTATCACCCGTGTGATGGGCAA
GGGGGGACCTGCAACAGTGAGCACGCTTGTGCCATCCATGTGGTGGGCAG
GGGGGGACCTGCAACAGTGAGCACGCTTGTGCCATCCATGTGGTGGGCAG
GGGGGGACCTGCAACAGTGAGCACGCTTGTGCCATCCATGTGGTGGGCAG
GGGGGGACCTGCAACAGCGAGCACGCTTGTGCCATCCATGTGGTGGGCAG
GGGGGGACCTGCAACAGTGAGCACGCTTGTGCCATCCATGTGGTGGGCAG
GGGGGGACCTGCAACAGTGAGCACGCTTGTGCCATCCATGTGGTGGGCAG
GGGGTGACCTGCAACTGTGCACCCGCTTGTGTCATCCACATGACGGACAG
GGAGCGGCCTGCGGCAGCGAAGACA--TGTACAATCCATATTATAGGCAG
GGAGCGGCCTGCGGCAGCGAAGACA--TGTACAATCCATATTATAGGCAG
GGG-GGACCTGCGACGGTGAACACGTTGTACGAATC-TCATGGTGGGCAG
GGTTTGACCTGCAACAGCGAGCACGTCTGTGCCATCCATGTGATGGGCGG
GGTTTGACCTGCAACAGCGAGCACGTCTGTGCCATCCATGTGATGGGCGG
GGGGCGACCGACGTAACTGAGCATGCTTACATCACCCGTATGGTGGGCGA
GGAGATAGCTGCGACAGTGAATACGCTTGCACTATCCACATGATGGGCAG
GGAGATAGCTGCGACAGTGAATACGCTTGCACTATCCACATGATGGGCAG
GGAGATAGCTGCGACAGTGAATACGCTTGCACTATCCACATGATGGGCAG
GGAGATAGCTGCGACAGTGAATACGCTTGCACTATCCACATGATGGGCAG
GGAGCGGCCTGCGACCGTGAACGCGTGTGCACCCTCCACATGGTGGGCAG
GGGGAGGCCTGCAGCTGTGAACGTGTTTGTGCGAACCATATGATGGGCAG
GGATCGACCCGCTGCTGCGAACACGTCTGTACCAAGCACCTGATGGGCGA
GGATCGACCCGCTGCTGCGAACACGTCTGTACCAACCACCTGATGGGCGA
GGAGCGGCCTGCGACCGTGAACGCGTGTGCACCCTCCACATGGTGGGCAG
GGAGCGGCCTGCGACCGTGAACGCGTGTGCACCCTCCACATGGTGGGCAG
GGAGCGGCCTGCGACCGTGAACGCGTGTGCACCCTCCACATGGTGGGCAG
GGAGCGACGTGCGGCAGTGAGCATGTTCGCGCCATTCACGTCCTGGGCGA
GGAGCGACGTGCGGCAGTGAGCATGTTCGCGCCATTCACGTCCTGGGCGA
CGAGCGACCTGCGACAGTGAGCACGTGTACACCATCCATGTGATGAGCAG
GGGGAGGCCTGCAGCTGTGAAGGTGTTTGTGCGAACCATATGATGGGCAG
GGGGAGAGTTGCTACTGTGAACGCGCCTGTGCCACTCGTGTGACGGGCAA
--------------------------------------------------
GGACAGATCTGCGACAAAAAACACGCTTGCGCTACCCACATGATGGTCAG
GGACAGATCTGCGACAAAAAACACGCTTGCGCTACCCACATGATGGTCAG
---CAGATCTGTAAAAAAAAACACGCTTGTGCCACCCACATGATGGTTAG
GGGGAGGCCTGCAGCTGTGAAGGTGTTTGTGCGAACCATATGATGGGCAG
GGGGAGGCCTGCAGCTGTGAAGGTGTTTGTGCGAACCATATGATGGGCAG
GGGGAGGCCTGCAGCTGTGAAGGTGTTTGTGCGAACCATATGATGGGCAG
GGGGAGGCCTGCAGCTGTGAAGGTGTTTGTGCGAACCATATGATGGGCAG
GGAGCGACCTGCGGCACTGCGCACGCGTGTGCCATCCATATGATGGGCAC
GGAGCGACCTGCGGCACTGCGCACGCGTGTGCCATCCATATGATGGGCAC
GGAGCGACCTGCGGCACTGCGCACGCGTGTGCCATCCATATGATGGGCAC
GGAGCGACCTGCGGCACTGCGCACGCGTGTGCCATCCATATGATGGGCAC
GGAGCGACCTGCGGCACTGCGCACGCGTGTGCCATCCATATGATGGGCAC
GGGGCAACACGCAACAGTGAACGCGCTTCTGCCACCCATATGGTTGGCAG
GGAGCCACCTGCGA------------------------------------
CGTGCGACCTGCGACAATGGACAATTCTGTGTCATCCATATGATAGGCA-
GGAGCCACCTGCGA------------------------------------
GGAGCCACCTGCGA------------------------------------
GGAGCCACCTGCGA------------------------------------
GGAGCGACCTGCGACCGTGAGCATGCTTGTACCATCCTTGTGATGGGCGA
GGGGCGACCTGCGACCGTGAGCTCGGTTGTGCCATCCATGTGACGGGCGG
GGGGCGACCTGCGACCGTGAGCTCGGTTGTGCCATCCATGTGGCGGGCGG
GGTGCGACCCGCAACCGTGAGCATGCTTGTGCCATCCATGCAATGAGCAC
GGCTCGCCCCGCGAGTGTGAGCAGGTTTGTGCCATTCATGTGATGGGCGG
GGAGCGACCTGCGACCGTGAGCATGCTTGTACCATCCATGTGATGGGCGA
GGAGCGACCTGCGACCGTGAGCATGCTTGTACCATCCATGTGATGGGCGA
GGCGCGACCCGGGACCGCGGGCACGTCTGTGGCATCCATATGATAGGCAA
GGCGCGACCCGGGACCGCGGGCACGTCTGTGGCATCCATATGATAGGCAA
GGCGCGACCCGGGACCGCGGGCACGTCTGTGGCATCCATATGATAGGCAA
GGCGCGACCCGGGACCGCGGGCACGTCTGTGGCATCCATATGATAGGCAA
GGCGCGACCCGGGACCGCGGGCACGTCTGTGGCATCCATATGATAGGCAA
GGGGCGACGTGCGACCGTGAGCTCGGTTGTGCCATCCATGTGACGGGCGG
GGGGCGACGTGCGACCGTGAGCTCGGTTGTGCCATCCATGTGACGGGCGG
GGGGCGACGTGCGACCGTGAGCTCGGTTGTGCCATCCATGTGACGGGCGG
GGGGTGAGCTACGACAGCGAACACGCTCGTGTCATTCATATGATAGGCGG
GGTGCGACCCGCGACCGTGAGCATGCTTGTGCCATCCATGCAATGGGCAC
GGTGCGACCCGCGACCGTGAGCATGTTTGTGCCATCCATGCAATGGGCAC
GGTGCGACCCGCGACCGTGAGCATGCTTGTGCCATCCATGCAATGGGCAC
GGTGCGACCCGCGACCGTGAGCATGCTTGTGCCATCCATGCAATGGGCAC
GGTGCGACCCGCGACCGTGAGCATGCTTGTGCCATCCATGCAATGGGCAC
GGTGCGACCCGCGACCGTGAGCATGCTTGTGCCATCCATGCAATGGGCAC
GGGGCAACACGCAACAGTGAACGCGCTTCTGCCACCCATATGGTTGGCAG
GGGGCAACACGCAACAGTGAACGCGCTTCTGCCACCCATATGGTTGGCAG
GGGGCAACACGCAACAGTGAACGCGCTTCTGCCACCCATATGGTTGGCAG
GGTGCGACCCGCGACTGT-AA-GCGCTTGTGCCATCCATGCAATGAGCAC
GGAGCAGCCTGCGACCGTGAACACGATTGT---AT-CATACAATAGGCGA
GGAGCGGCCGGTGACTGTGAAGACGCTTGTGCCGTCCGCGCGATGGGCCG
GGAGCGGCCGGTGACTGTGAAGACGCTTGTGCCGTCCTCGCGATGGGCC-
GGAGCGGCCGGTGACTGTGAAGGCGCTTGTGCCGTCCTCGCGATGGGCC-
GGAGCGGCCGGTGACTGTGAAGGCGCTTGTGCCGTCCTCGCGATGGGCC-
GGAGCGGCGTGCGACGGCGGACACCTTTGTGCCACCCACGTGATGGGCAG
GGAGCGGCGTGCGACGGCGGACACCTTTGTGCCACCCACGTGATGGGCAG
GGAGCGGCGTGCGACGGCGGACACCTTTGTGCCACCCACGTGATGGGCAG
GGAGCGGCGTGCGACGGCGGACACCTTTGTGCCACCCACGTGATGGGCAG
GGAGCGGCGTGCGACGGCGGACACCTTTGTGCCACCCACGTGATGGGCAG
GGAGCGGCGTGCGACGGCGGACACCTTTGTGCCACCCACGTGATGGGCAG
GGAGCGGCGTGCGACGGCGGACACCTTTGTGCCACCCACGTGATGGGCAG
GGAGCGGCGTGCGACGGCGGACACCTTTGTGCCACCGACGTGATGGGCAG
GGAGCGGCGTGCGACGGCGGACACCTTTGTGCCACCGACGTGATGGGCAG
GGAGCAGCCTGCGACCGTGAACACGATTGTATCAT--ACAA--TAGGCGA
GGAGCGACCTGCCACAGTGAACACGCTTGTGCCATCCACATGATGGGCAA
GGAGCGACCTGCCACAGTGAACACGCTTGTGCCATCCACATGATGGGCAA
GGAGCGGCCGGTGACTGTGAAGGCGCTTGTGCCGTCCGCGCGATGGGCTG
GAAGCCACCTGAGTCGGTGCACGCGTTTGAGCCATCCACGCCATAGGCAG
GGGGTGACCCGCGACAGCGAACACGCTTGTGCCGTCCCCGTGGTAGGCAG
GGGGTGACCCGCGACAGCGAACACGCTTGTGCCGTCCCCGTGGTAGGCAG
GGGGTGACCCGCGACAGCGAACACGCTTGTGCCGTCCCCGTGGTAGGCAG
GGGGTGACCCGCGACAGCGAACACGCTTGTGCCGTCCCCGTGGTAGGCAG
GGGGTGACCCGCGACAGCGAACACGCTTGTGCCGTCCCCGTGGTAGGCAG
GGGGTGACCCGCGACAGCGAACACGCTTGTGCCGTCCCCGTGGTAGGCAG
GGGGTGACCCGCGACAGCGAACACGCTTGTGCCGTCCCCGTGGTAGGCAG
GGGGTGACCCGCGACAGCGAACACGCTTGTGCCGTCCCCGTGGTAGGCAG
GGGGTGACCCGCGACAGCGAACACGCTTGTGCCGTCCCCGTGGTAGGCAG
GGGGTGACCCGCGACAGCGAACACGCTTGTGCCGTCCCCGTGGTAGGCAG
GGGGTGACCCGCGACAGCGAACACGCTTGTGCCGTCCACGTGGTAGGCAG
GGGGTGACCCGCGACAGCGAACACGCTTGTGCCGTCCACGTGGTAGGCAG
CTAGCGACCCGCGACAGCGAACACGCTTGCGCCATCCATAGGATCGGCAG
AGCGCAACCTGCGACAAGGGGCACAGCTGTGCCGTCTACGTGAGAGGCAG
GGAGCGACCTGCGACAGCGAACACGCTTGTGCCACCCATGTGCTAGGCAG
GGAGCGACCTGCGACAGCGAACACGCTTGTGCCACCCATGTGCTAGGCAG
GGAGCGACCTGCGACAGCGAACATGCTTGTGCCACCCATGTGCTAGGCAG
GGAGCGACCTGCGACAGCGAACATGCTTGTGCCACCCATGTGCTAGGCAG
TGGGGGGCCTGTGACAGTGAGTACGCTTGTGCCATCTCTACGGTGGGCAG
GGAGAAACCTGCGACAGTGAGCGCGTTGCTATCATTTCTACGATGAACAG
GAAGAGAACCACGATAGTGGGCACACGTGGGCCACTCCTATGATAGGCA-
GGTGCGACCTGCGGCCGTGAACACGTCTGTGCCGCCCACATG-GCGGCAA
-GAGCGACCTGCG-------------------------------------
GGAGCGACCTGCGACGGTGCACACGCTTGCGCCATCCATGCGA----CTA
GGAGCGACCTGCGACGGTGCACACGCTTGCGCCATCCATGCGA----CTA
GGAGCGACCTGCGACGGTGCACACGCTTGCGCCATCCATGCGA----CTA
TGTGCGACCTGCGACTGTGAGCACGCTTGTGCCGTCCATATGAAAGGCAA
TGTGCGACCTGCGACTGTGAGCACGCTTGTGCCGTCCATATGAAAGGCAA
TGTGCGACCTGCGACTGTGAGCACGCTTGTGCCGTCCATATGAAAGGCAA
GGTGCGACCTGCGGCCGTGAACACGTCTGTGCCGCCCACATGATGGGCAA
GGTGCGACCTGCGGCCGTGAACACGTCTGTGCCGCCCACATGGCGGGCAA
GGTGCGACCTGCGGCCGTGAACACGTCTGTGCCGCCCACATGATGGGCAA
GGTGCGACCTGCGGCCGTGAACACGTCTGTGCCGCCCACATGGCGGGCAA
GGTGCGACCTGCGGCCGTGAACACGTCTGTGCCGCCCACATGATGGGCAA
GGAGCGACCTGCGACCGTGGACACGTCTGTGCCATCCATGTGATAGGCAA
GGAGCGACCTGCGACCGTGGACACGTCTGTGCCATCCATGTGATAGGCAA
TGCGCGACCTGCAACCGTGAACACGCGTGTGCCAGCCGTGTGGTGGGCAG
TGCGCGACCTGCAACCGTGAACACGCGTGTGCCAGCCGTGTGGTGGGCAG
GGAGCGACGTTCGACGGTGCGCACGTCTGTGTCATCCACAAGATGGGCAG
GGAGCCACCGGCAACAGTGAAGATGTTTGCACCACGGGTATGCTCGGCAG
GGAGCCACCGGCAACAGTGAAGATGTTTGCACCACGGGTATGCTCGGCAG
GGAGCCACCGGCAACAGTGAAGATGTTTGCACCACGGGTATGCTCGGCAG
GGGGCGA-------------------------------------------
GGGGCGA-------------------------------------------
GGGGCGA-------------------------------------------
GGGGCGA-------------------------------------------
GGGGCGA-------------------------------------------
GGAGCGAAGTGCAACAGTGCACGCGTTTATGCCGTCAATGTGACAGGAAA
GGGGCGACCTGCGGCAGTGGACAGACTTGTGCCGCTTATAGGATTGCCAG
GGAGCGGCCAGCGACCGTGCACACGCTTGTGCCGTCCATGTGGTGCGCAA
GGAGCGCCCCGCGGCTGTGAACAGGTCTGTGCCACCCACCTGATAGGCAG
-GAGCAACCCGCGACATTGAATATTTGCATGCCATCCACATGATAGGCAA
GGAGCGGCCTGCAGCAGTGAGCGCACTTGCGCCATCCGTCTGGTGGGCAT
GGAGCGGCCTGCAGCAGTGAGCGCACTTGCGCCATCCGTCTGGTGGGCAT
GGAGCGGCCTGCAGCAGTGAGCGCACTTGCGCCATCCGTCTGGTGGGCAT
GGAGCGGCCTGCAGCAGTGAGCGCACTTGCGCCATCCGTCTGGTGGGCAT
GGAGCGGCCTGCAGCAGTGAGCGCACTTGCGCCATCCGTCTGGTGGGCAT
GGAGCGGCCTGCAGCAGTGAGCGCACTTGCGCCATCCGTCTGGTGGGCAT
GGAGCGGCCTGCAGCAGTGAGCGCACTTGCGCCATCCGTCTGGTGGGCAT
GGAGCGACCTGCGACAGTGAAGATGTTTGCATCATCGGTAT-ATAGGCAG
GGAGCGACCTGCGACAGTGAAGATGTTTGCATCATCGGTAT-ATAGGCAG
------------GACGCTGGGCACGTCTGTGCCATCCATATGATTTGCAG
------------GACGCTGGGCACGTCTGTGCCATCCATATGATTTGCAG
GGAGCGGCCAGCGACCGTGCACACGCTTGTGCCGTCCATGTGGTGCGCGA
GGAGCGGCCAGCGACCGTGCACACGCTTGTGCCGTCCATGTGGTGCGCGA
GGAGCGGCCAGCGACCGTGCACACGCTTGTGCCGTCCATGTGGTGCGCGA
GGAGCGGCCAGCGACCGTGCACACGCTTGTGCCGTCCATGTGGTGCGCGA
GGAGCGGCCAGCGACCGTGCACACGCTTGTGCCGTCCATGTGGTGCGCGA
GGCGCGACCTGCGACAGCGAATGCGCTGGTGCCATCCATGTGATGGGCGA
GGCGCGACCTGCGACAGCGAATGCGCTGGTGCCATCCATGTGATGGGCGA
GGCGCGACCCGCGACGGCGAATGCGCTGGTGCCATCCATGTGATGGGCGA
GGCGCGACCCGCGACGGCGAATGCGCTGGTGCCATCCATGTGATGGGCGA
GGCGCGACCCGCGACGGCGAATGCGCTGGTGCCATCCATGTGATGGGCGA
GGTGCGACCCGCGACAGGGAACACGTTCATGCCATCCACACGATAGGCAA
GGTGCGACCCGCGACAGGGAACACGTTCATGCCATCCACACGATAGGCAA
GGAGCGCCCCGCGGCTGTGAACAGGTCTGTGCCACCCACCTGATAGGCAG
--------------------------------------------------
--------------------------------------------------
GGAGCCGCCTGCGACAAGGAACACGTCTGTGCCATTACCGAGATGGTCAA
GGAGCGACCTGCGACAGTGAAGATGTTTGCATCATCGGTAT-ATAGGCAG
GGATTGACCTGCAACACTGAGCAAGTGCGCACTACCCATATGCTGGACAC
GGAGGGGCCTGCGACCGTGCACACGCTTCTGCCGTCCATGTAACGGGCAG
GGAGGGGCCTGCGACCGTGCACACGCTTCTGCCGTCCATGTAACGGGCAG
GGAGGGGCCTGCGACCGTGCACACGCTTCTGCCGTCCATGTAACGGGCAG
GGCGCGACCTGCGACGGCGAATGCGCTGGTGCCATCCATGTGATGGGCGA
GGCGCGACCTGCGACGGCGAATGCGCTGGTGCCATCCATGTGATGGGCGA
GGGGCCACCCGCGACAATGACCACGCTTGTACCATTCACGTGATAGGCGA
GGCGCGACCCGCGACGGCGAATGCGCTGGTGCCATCCATGTGATGGGCGA
GGCGCGACCTGCGACGGCGAATGCGCTGGTGCCATCCATGTGATGGGCGA
GGAGCGAGCTGCGACGGTGAGCACACGCTTG--A-CCATGCGAAGGGCAG
GGAGCGAGCTGCGACGGTGAGCACACGCTTG--A-CCATGCGAAGGGCAG
GGAGCGAGCTGCGACGGTGAGCACACGCTTG--A-CCATGCGAAGGGCAG
--------------------------------------------------
-------GCTGCGGCGGTGCACGCGTCTGCGCCATCCACATGATGGGCGA
------------------------------GCCGTCCGCGTGACGGACGA
------------------------------GCCGTCCGCGTGACGGACGA
------------------------------GCCGTCCGCGTGACGGACGA
------------------------------GCCGTCCGCGTGACGGACGA
------------------------------GCCGTCCGCGTGACGGACGA
------------------------------GCCGTCCGCGTGACGGACGA
------------------------------GCCGTCCGCGTGACGGACGA
------------------------------GCCGTCCGCGTGACGGACGA
--------------------------------------------------
--------------------------------------------------
GGAGTGAGCGGCGACCGTACACACGCTTGCGCCATCCACATGATGGGCAG
GGAGCGAGCGGCGACCGTGCACATGCTTGCGCCATCTACATGATGTGGAG
GGGGCGACCTGCAACAGTGCACAGGTTTGTGCCATCCATGTGGCGTGCAG
GGGGCGACCTGCAACAGTGCACAGGTTTGTGCCATCCATGTGGCGTGCAG
-------GCTGCGGCGGTGCACGCGTCTGCGCCATCCACATGATGGGCGA
-------GCTGCGGCGGTGCACGCTTCTGCGCCATCCACATGATGGGCGA
-------GCTGCGGCGGTGCACGCGTCTGCGCCATCCACATGATGGGCGA
-------GCTGCGGCGATGCACGCGTCTGCGCCATCCACATGATGGGCGA
------------------------------GCCGTCCGCGTGACGGACAA
------------------------------GCCGTCCGCGTGACGGACGA
GGAGCGGCCTGCGATAGTGGACACGTGTGCACCATCTACGTGATGGGCAG
GGAGCGGCCTGCGATAGTGGACACGTGTGCACCATCTACGTGATGGGCAG
GGAGCGGCCTGCGATAGTGGACACGTGTGCACCATCTACGTGATGGGCAG
--AGCGAGCGGCGACCGTACACACGCTTGCGCCATCCACATGATGGGCAG
GGAGCGAGCGGCGACCGTACACACGCTTGCGCCATCCACATGATGGGCAG
GGAGTGAGCGGCGACCGTACACACGCTTGCGCCATCCACATGATGGGCAG
GGAGCGAGCGGCGACCGTACACACGCTTGCGCCATCCACATGATGGGCAG
GGTGC-ACCTGCGACAGCGAGCACGTCGGTGCCATCGCGATGATGGGTGC
GGTGTGACCTGCGACTTTGCACAGGCTTGCGCCATCCATATGATGGGCAG
GGAGCGACCTGCGGCAGCGAGCACGTTTGCACCACCCACATGATGGGCAG
GGAGCGACCTGTGACAGTGCACAGGCTTGTGCCGTTCACGTGCTCGACGG
GGGGCGACCTGCGGCAGTGCACAGGCTTGCGCCACCCATATGGTAGGCGA
GGGGCGATCTGCGGCAGTGCACAGGCTTGCGCCACCCATATGGTAGGCGA
GGGGCGACCCGCGGCAGTGCACAGGCTTGCGCCACCCATATGGTAGGCGA
GGGGCGACCCGCGGCAGTGCACAGGCTTGCGCCACCCATATGGTAGGCGA
GGGGCGACCCGCGGCAGTGCACAGGCTTGCGCCACCCATATGGTAGGCGA
GGGGCAACCCGCGGCAGTGCACAGGCTTGCGCCACCCATATGGTAGGCGA
------------------------------GCCGTCCGCGTGACGGACGA
GGAGTGGTCTGCGACAGTGAACACGTCTGTGCCATCCACGTAATGGGCAG
GGAGTGGTCTGCGACAGTGAACACGTCTGTGCCATCCACGTAATGGGCAG
GGAGCGACCTGCGGCAGCGAGCACGTTTGCACCACCCACATGATGGGCAG
GGAGCGACCTGCGGCAGCGAGCACGTTTGCACCACCCACATGATGGGCAG
GGAGCGACCTGCGGCAGCGAGCACGTTTGCACCACCCACATGATGGGCAG
GGAGCGACCTGCGGCAGCGAGCACGTTTGCACCACCCACATGATGGGCAG
GGAGCGACCTGCGGCAGCGAGCACGTTTGCACCACCCACATGATGGGCAG
-GAGCTGCCCGAGTCAGTGAGCACGTTGGTGCCACTCACATGATAGGCAG
-GAGCTGCCCGAGTCAGTGAGCACGTTGGTGCCACTCACATGATAGGCAG
-GAGCTGCCCGAGTCAGTGAGCACGTTGGTGCCACTCACATGATAGGCAG
GGAGCGGCCCGCGACATCGAACACGTTGGAGCGACTAATATGATAGGCAG
---GCGACATGCGATAGCGAGCACGCTCGTAATGCTGACATGATGGGCAA
---GCGACATGCGATAGCGAGCACGCTCGTAATGCTGACATGATGGGCAA
GGAGGGATCTTCGACAGCGAGTACGCTTGTACGACTCGTGTGATGGGCAG
GGAGGGATCTTCGACAGCGAGTACGCTTGTACGACTCGTGTGATGGGCAG
GGGGCGACCTGCGGCAGTCGACACGTGTGTGCCGTCGATGTGGCAGGCGA
GGCGAGAGCGGCGACAGGGCACGCGTTTCTGCCATTTGTATGATGCGCGC
GGCGAGAGCGGCGACAGGGCACGCGTTTCTGCCATTTGTATGATGCGCGC
GGAGCGACCTGCGAGATCCAGCACCTTTGCATTATCCAGGTGATAGGCAA
GGAGCCACCCGCGGCAGCGAACACGCTTGCGCCATCCATAGGATCGGCAG
GGAGAGCGCTGCGGCAGTGCACACGCTTGCGCCATCCATGTGATGGGCGG
GGAGAGCGCTGCGGCAGTGCACACGCTTGCGCCATCCATGTGATGGGCGG
GGAGAGCGCTGCGGCAGTGCACACGCTTGCGCCATCCATGTGATGGGCGG
GTAGCGGTCGGCGACAGTGAAGACATATGCCCCGTTTATATAATAGGCGA
GTAGCGGTCGGCGACAGTGAAGACATATGCCCCGTTTATATAATAGGCGA
GAAGCGGCCTGCGACAGTGCACACGCTTGCGCCATCCATAGGATAGGCAA
GGAGGGACCTGCGACAGTGGACACGCTTGTGACATCGATGTGATGGGCAG
GGT-CGACCTGCGACAGTGCACACACTCGTGTCATCCATGCG-CGGGCAG
GGT-CGACCTGCGACAGTGCACACACTCGTGTCATCCATGCGGCGGGCAG
GGT-CGACCTGCGACAGTGCACACACTCGTGTCATCCATGCGGCGGGCAG
GGAGAGACCTGCGACAGTGCTCACGCATGTACCATCCATGTGAGGTGGAG
AGAGCGGCCTGAGACGGTGAACATGCTTACGCCATTCATACAATAGGCGA
GGAGCGGCCTGTGACACCGGACACGCTTTTGTCATCCATACG-TGGGCGA
GGAGCGGCCTGTGACACCGGACACGCTTTTGTCATCCATACG-TGGGCGA
GGCGAGAGCGGCGACAGGGCACGCGTTTCTGCCATTTGTATGATGCGCGC
GGGGCGT-------------------------------------------
GGACCACCCTGCGGCCATGAACATGCTTGTAGTATCCGTATGATAGGCAA
GGGGCGT-------------------------------------------
GGGGAGACCTGCGACGGCGCACACGCTTGCACCATACATATGATGGGCAA
GGGGAGACCTGCGACGGCGCACACGCTTGCACCATACATATGATGGGCAA
GGGGAGACCTGCGACGGCGCACACGCTTGCACCATACATATGATGGGCAA
GGAGCAACCCGTGACGTTGCACATTCTTTTACCATACACGTGAGGGGCAG
GGAGCGACCTGCGAG--TAAACAGGCTTGTGCCATCCATAGGATAGGCAG
GGAGCGACACGCAGCCGTGAGCAAGCTTGTGCCACCCATATGACGGGTGA
GGAGCGACACGCAGCCGTGAGCAAGCTTGTGCCACCCATATGACGGGTGA
GGAGCGACACGCAGCCGTGAGCAAGCTTGTGCCACCCATATGACGGGTGA
AGGGCGACCTGCAGCAGTGGACACACTCATACCATCCTCATGATGTGCAG
GGAGGGACCTGCGACAGTGGACACGCTTGTGACATCGATGTGATGGGCAG
GGAGGGACCTGCGACAGTGGACACGCTTGTGACATCGATGTGATGGGCAG
GGA-CGACGTGGCAGCGTAAGCACGCTTGCACCAGGCACATGAGGGGCAA
GGAGGGATCCCCGACAGTGGACACGCTTGTACGACTCGTGTGATGGGCAG
GGAGGGATCTTTGACAGCGGACACGTTTGCGTCATCCATGTGATGGGCAG
GGAGGGATCTTTGACAGCGGACACGTTTGCGTCATCCATGTGATGGGCAG
GGGGCGACCTGCGGCAGTCGACACGTGTGTGCCGTCGATGTGGCAGGCGA
------ACCTGCGACGGCGAGCACGCTTGTGCCATCCACGTGATGGGCAG
------ACCTGCGACGGCGAGCACGCTTGTGCCATCCACGTGATGGGCAG
------ACCTGCGACGGCGAGCACGCTTGTGCCATCCACGTGATGGGCAG
GGAGTAACCTGCGACGGCGAGCACGCTTGTGCCATCCACATGATGGGCAG
GGAGTAACCTGCGACGGCGAACACGCTTGCGCCATCCACATGATGGGCAA
GGAGTGACCTGAGACGGCGAGCACGCTTGTGCCATCCACGTGATGGGCAG
GGCGAGAGCGGCGACAGGGCACGCGTTTCTGCCATTTGTATGATGCGCGC
GGCGAGAGCGGCGACAGGGCACGCGTTTCTGCCATTTGTATGATGCGCGC
GGAGCAA-------------------------------------------
GGAGCGGCCCGAGACGGTGCGAGCGCTTGTGCCACCTATATGGTGGGCGA
GGAGCGGCCCGAGACGGTGCGAGCGCTTGTGCCACCTATATGGTGGGCGA
GGAGCGGCCCGAGACGGTGCGAGCGCTTGTGCCACCTATATGGTGGGCGA
GCCGCGACCCGCGACCGTGCCGGCGGCGGCGCCATCCATGCGATTTACGG
GCCGCGACCCGCGACCGTGCCGGCGGCGGCGCCATCCATGCGATTTACGG
GAAGCGA-------------------------------------------
GAAGC--CCTGCGACAGCGAACGCGTTTGCGCCGTTCATATAATACGCGA
GGGGCGACCGGCGACAGTGAGCACGCGTGTGCCATCCATATGATCGGCAG
GGGGCGACCGGCGACAGTGAGCACGCGTGTGCCATCCATATGATCGGCAG
GGGGCGACCTGCGACGGTGAACGCGTCCGCGCGACCCACATGACAGGCAG
GGGGCGACCTGCGACGGTGAACGCGTCCGCGCGACCCACATGACAGGCAG
GGGGCGACCTGCGACGGTGAACGCGTCCGCGCGACCCACATGACAGGCAG
GGAGTGGCCTACGACGTTGAACATGTTTGTGCCACCTGCGTGATGGGCAA
GGAGTGGCCTACGACGTTGAACATGTTTGTGCCACCTGCGTGATGGGCAA
GCCGCGACCCGCGACCGTGCCGGCGGCGGCGCCATCCATGCGATAGGCGG
GCCGCGACCCGCGACCGTGCCGGCGGCGGCGCCATCCATGCGATAGGCGG
--------------------AAACTTTCGCACCATCCATGTGATGGACGA
AGAGCGCTCTGCGACGGTGCACACGCGTGCACTATCCATGTAATAGGCAA
AGAGCGCTCTGCGACGGTGCACACGCGTGCACTATCCATGTAATAGGCAA
AGAGCGCTCTGCGACGGTGCACACGCGTGCACTATCCATGTAATAGGCAA
AGAGCGCTCTGCGACGGTGCACACGCGTGCACTATCCATGTAATAGGCAA
AGAGCGCTCTGCGACGGTGCACACGCGTGCACTATCCATGTAATAGGCAA
GGGGCGACCCGCGGCAGTGAGCACGTCTGTACCACCCATATGGTGAGCA-
GGGGCGACCCGCGGCAGTGAGCACGTCTGTACCACCCATATGGTGAGCA-
AGGGCGACCAGCGACCGCAAGCACGCTTGCGCCATCCGTATAATGAGGAG
AGGGCGACCAGCGACCGCAAGCACGCTTGCGCCATCCGTATAATGAGGAG
GAAGCGGCCTGCGTTAGCGAAGGCGTCTGCACTATCCATGTGACGGGCAG
-GAGCGACCCGCGATGGTGAACCCGCTTGTGCCATTTGCATCACAG-CGA
GGGGCGACCGGCGACAGTGAGCACGCGTGTGCCATCCATATGATCGGCAG
GGGGCGACCGGCGACAGTGAGCACGCGTGTGCCATCCATATGATCGGCAG
GGGGCGACCGGCGACAGTGAGCACGCGTGTGCCATCCATATGATCGGCAG
GGGGCGACCGGCGACAGTGAGCACGCGTGTGCCATCCATATGATCGGCAG
GGGGCGACCGGCGACAGTGAGCACGCGTGTGCCATCCATATGATCGGCAG
GGGGCGACCGGCGACAGTGAGCACGCGTGTGCCATCCATATGATCGGCAG
AGGGTGACCGGCGACACTGAGCACATCTGCGCCATCCATATAATGCGCAA
AGGGTGACCGGCGACACTGAGCACATCTGCGCCATCCATATAATGCGCAA
CGAGTGACCTGCGACTTTGAACAGGTTTGTGCCGTCGACATGATGGGTAG
GCCGCGACCCGCGACCGTGCCGGCGGTGGCGCCATCCATGCGATAGGCGG
GCCGCGACCCGCGACCGTGCCGGCGGTGGCGCCATCCATGCGATAGGCGG
AGACCGACCTGCGACTGTGCACACGCTTGTGCCATCCACGTGATGGGCA-
AGACCGACCTGCGACTGTGCACACGCTTGTGCCATCCACGTGATGGGCA-
AGACCGACCTGCGACTGTGCACACGCTTGTGCCATCCACGTGATGGGCA-
AGACCGACCTGCGACTGTGCACACGCTTGTGCCATCCACGTGATGGGCA-
GGAGAGCGCTGCGATGCTAAACACGCTTGTGCCGTCCATGTGGCGGGCAG
GGGGCACCCTCGCCCACAGCGTGCGCTTGTGCCATCCATATCATAGACAG
GGGGCACCCTCGCCCACAGCGTGCGCTTGTGCCATCCATATCATAGACAG
GGAGCCACCTGCGACAGTGAACACGCCTGTGCCATCCATGTGATAGGCAG
GGGGAGAGATCCGCCACTGTGCGCGCCCGTGCCGTGCGTATGCTGGGCGG
GGGGAGAGATCCGCCACTGTGCGCGCCCGTGCCGTGCGTATGCTGGGCGG
TCAGAGTGACCCGCCACCGTGAACGCTTGTACCACGCACACGACGGGCAA
GAAGCGGCCTGCGTT-CAGCGAAGGCGTCTGCAATCCATGTGACGGGCAG
TGAGCGACCTGCGGCCGTGGGCACACGCGTGCCCTCCACATGATGGGCCG
AGAGCGACCCGTGAACGTGAGCACACCTGTTTCATCCCTGTGATAAGCAG
GGAGCGACCTGCGACA-TGGACACCCTTGTACCATCCGTATGGTGGGCAA
GGAGCGACCTGCGACA-TGGACACCCTTGTACCATCCGTATGGTGGGCAA
GGAGCGACCTGCAGCAGCGAACACACCTGTGCCGTCCGTGCGTTGGGCAA
GGAGCGACCTGCAGCAGCGAACACACCTGTGCCGTCCGTGCGTTGGGCAA
GGAGCGACCTGCAGCAGCGAACACACCTGTGCCGTCCGTGCGTTGGGCAA
GAAGTGACTCTTGACAGTGCATAAACTTGCACCATCCACAAGATGAGCGG
GGAGTGGCATGCCACAGGGAATACGCTTTTACCATTGATATTATGAACGA
GGAGCCATCTGCGACCGTGCACAGGCTTGCACCATCCATCCG-TGAGCGG
GGAGCGACCTGCGACAGAGAGCACGCTTGCGCCACCCACGCGATGGGCGA
TGAGCGACCTGCGGCCGTGGGCACACGCGTGCCCTCCACATGATGGGCGA
TGAGCGACCTGCGGCCGTGGGCACACGCGTGCCCTCCACATGATGGGCGA
TGAGCGACCTGCGGCCGTGGGCACACGCGTGCCCTCCACATGATGGGCGA
TGAGCGACCTGCGGCCGTGGGCACACGCGTGCCCTCCACATGATGGGCGA
TGAGCGACCTGCGGCCGTGGGCACACGCGTGCCCTCCACATGATGGGCGA
TGAGCGACCTGCGGCCGTGGGCACACGCGTGCCCTCCACATGATGGGCGA
CGGGTGATCTGCAGTCGCGAACGCGTGTGCACTCTCCACATGATGGGAGG
GGGGTGACTTGCGACAGTGAACACGTTTCTACGGCCCATATGACAAGCGA
GGGG----------------------------------------------
GGAGCGACCCGCGACTGTCCACCGGGTTGCGCCATCCATGCTATGGGCGG
GGAGCGACCCGCGACCGTCCACCGGGTTGCGCCATCCATGCTATGGGCGG
GGAGCGACCTGCGGCAGCGAACACGTTTGCACCACACATATGTTGGGAAA
GGAGCGACCCGCCACAGTGCACACGCTTGTGCCATCCATGCGATAGGCAG
GGAGCGACCTGCGACAGAGAGCACGCTTGCGCCACCCACGCGATGGGCGA
GGAGCGACCTGCGACAGAGAGCACGCTTGCGCCACCCACGCGATGGGCGA
GGAGCGACCTGCGACAGAGAGCACGCTTGCGCCACCCACGCGATGGGCGA
GGAGCGACCTGCGACAGAGAGCACGCTTGCGCCACCCACGCGATGGGCGA
CGGGTGTTCTGCAGTCGCGAACGCGTGTGCACTCTCCACATGATGGGCAG
CGGGTGATCTGCAGTCGCGAACGCGTGTGCACTCTCCACATGATGGGCAG
CGGGTGTTCTGCAGTCGCGAACGCGTGTGCACTCTCCACATGATGGGCAG
CGGGTGATCTGCAGTCGCGAACGCGTGTGCACCCTCCACATGATGGGCAG
CGGGTGATCTGCAGTCGCGAACGCGTGTGCACTCTCCACATGATGGGCAG
AGAGAGACCCGCGACAGTGCACACGCTTGCGCCATCCACATGATGGGCAG
GGAGCGACCTGCAACAACGAACACGTTTGTACCAGCC-CAT-ATGGGCAG
GGAGCGACCTGCAACAACGAACACGTTTGTACCAGCC-CAT-ATGGGCAG
GGAGCGACCCGCGACTGTCCACCGGGTTGCGCCATCCATGCTATGGGCGG
GGAGCGACCCGCGACTGTCCACCGGGTTGCGCCATCCATGCCATGGGCGG
GGAGCGACCCGCGACCGTGCACCGGGTTGCGCCATCCATGCTATGGGCGG
GGAGCGACCCGCGACCGTGCACCGGGTTGCGCCATCCATGCTATGGGCGG
GGAGCGACCCGCGACTGTCCACCGGGTTGCGCCATCCATGCTATGGGCGG
GGAGCGACCCGCGACCGTGCACCGGGTTGCGCCATCCATGCTATGGGCGG
GGAGCGACCTGCGGCAGCGAACACGTCTGTATTGCGCATATCATGG-CAG
GGAGCGACCTGCGGCAGCGAACACGTCTGTATTGCGCATATCATGG-CAG
GGAGCGACCTGCGGCAGCGAACACGTCTGTATTGCGCATATCATGG-CAG
GGAGCCACCTGCTACAGTGAACGCGTCTGTGCCATCAAAAGGATGCGCAT
GGAGCGACCCGCCACAGTGCACACGCTTGTGCCATCCATGTGATGGGCGA
GGAGCGACCCGCCACAGTGCACACGCTTGTGCCATCCATGTGATGGGCGA
GGGGCGAACTGCGACAGTAAGCACGCGTGTACACTCTCCACGATGGACAG
GGGGCGAACTGCGACAGTAAGCACGCGTGTACACTCTCCACGATGGACAG
GGAGCGACCCGCGACCGTGCACCGGGTTGCGCCATCCATGCTATGGGCGG
GAAGCGACCGGCGACAGTGAACACGCCTGCGCTAATCTATAGATGGGCGC
--------------------------------------------------
GGAACCACCTGCGACAATGACCAGGCTTGT--------------------
GGAGCGACCCGCGTCTGTACGCACGCTTGTGCCATCCCTATGATAGGCGG
GGAGCGGCGTTGG--AGGGCGAACGTGAGTGCTACCCATATGATGGGGGG
GGAGCGACCTGCGACACCGCACACGTTTGTAG------------------
GGGGTCCGCTGCGACCGTGAACACGCTCGTGCCACCTGTATGATAGACAG
GGAGC-AGCCG-GAGAGTGAACACGTCTGCGCCAT--GTATGATGGGCAG
GGAG----------------------------------------------
GGAG----------------------------------------------
GGAG----------------------------------------------
GGAG----------------------------------------------
GGAGTGAGCGGTGGCAGTGCGCACGCTTGTGCCGTCCATATGGGAGGCAA
GGAGTGAGCGGTGGCAGTGCGCACGCTTGTGCCGTCCATATGGGAGGCAA
GGAGCGACCCGCGACGCTGAACACGTCGGCGCCATCGACGTGATGGGCGC
GGAGCGACCCGCGACGCTGAACACGTCGGCGCCATCGACGTGATGGGCGC
GGAGCGACCCGCGACGCTGAACACGTCGGCGCCATCGACGTGATGGGCGC
GGAGCGACCCGCGACGCTGAACACGTCGGCGCCATCGACGTGATGGGCGA
GGAGCGACCCGCGACGCTGAACACGTCGGCGCCATCGACGTGATGGGCGA
GGAGCGACCCGCGACGCTGAACACGTCGGCGCCATCGACGTGATGGGCGA
GGAGCAACCTACGACAGTGCACACGCTGGTGTCATCCATACGGTAGACGA
GGAGCGACCGGCAACAGTGCACACGCTTGTGCCACCCCTATGATGGGCAG
GGAGCGACCGGCGACAGTGCACACGCTTGTGCCACCCCTATGATGGGCAG
AGACGGACCTGCGACAGCGAACAAGTCTACGTCCTTCATATGATGAGCAG
GGAGCAACCTGCGTCTGTACGCACGCTTGTGCCATCCCTATGATAGGCGG
GGAGCGACCTGCGTCTGTACGCACGCTTGTGCCATCCCTATGATAGGCGG
GCTGCAGCCTGCGACAGTGCACCGGTCTGACCCGTCGATATGATGGGCGA
GCTGCAGCCTGCGACAGTGCACCGGTCTGACCCGTCGATATGATGGGCGA
GCTGCAGCCTGCGACAGTGCACCGGTCTGACCCGTCGATATGATGGGCGA
GGAGCGACCGGCGGCCGTGCGCGCGTTTATATCGTCGATATGGTAGGCGC
GGAGCGACCTGCGGCCGTGCGCGCGTTTATATCGTCGATATGGTAGGCAC
GGAGCGACCTGCGGCCGTGCGCGCGTTTATATCGTCGATATGGTAGGCAC
GGAGCAACGCGCGACCGCGAAAG-GTTTGTGCCATCTATATG-TAGGCAG
GGAGCAACGCGCGACCGCGAAAG-GTTTGTGCCATCTATATG-TAGGCAG
GGAGCGACCCACGTCCGTGCACACGCTTGTGCCATCCATACGATGGGCAG
GGAGCGGCCTGCGGCAGTGAACAGGTTTGTGCCACCCATACGATGGGCGA
GGAGAGACCTGCGACCGTGAACGCCGTTGTACAAATGATACAATAGGCAG
GCAGCGT-------------------------------------------
GGAGCCG-------------------------------------------
GAAGCGAGCTGTGACAGTGAGCACGCTGGTGTCATCCATATCATAGGCGG
GGAGCGACCCGCGACGCTGAACACGTCGGCGCCATCGACGTGATGGGCGC
GGAGCGACCCGCGACGCTGAACACGTCGGCGCCATCGACGTGATGGGCGC
GAAGCGACCGGCGACAGTGAACACGCCTGCGCTATCTATATGATGGGCGC
GGAGCGACCTGCGACCGTGCACACGCTTGTGCCATCCACGTGATGGGCAT
GGAGCGACCTGCGACCGTGCACACGCTTGTGCCATCCACGTGATGGGCAT
GGAGCGACCTGCGACCGTGCACACGCTTGTGCCATCCACGTGATGGGCAT
GGAGCGACCGGCGACAGTGCACACGCTTGTGCCACCCCTATGATGGGCAG
GGAGCAACCTGCGTCTGTACGCACGCTTGTGCCATCCCTATGATAGGCGG
GCTGCAGCCTGCGACAGTGCACCGGTCTGACCCGTCGATATGATGGGCGA
GGAGCG-CCTGCGACAGTGAACCTGCTTGTGCCATCCATATG-TGG-C-T
-GAGCGACCTGCGA------------------------------------
-GAGCGACCTGCGA------------------------------------
-GAGCGACCTGCGA------------------------------------
-GAGCGACCTGCGA------------------------------------
-GAGCGACCTGCGA------------------------------------
AGAGCGACCGGCGTCAGTGAACACATCTGTGCCATTCCTGTGACAGGCAG
GGAGCGCCCTGCGACAGTGAGCACGCCTGCGCCATTCATATGATGAGCAA
GGAGCGCCCTGCGACAGTGAGCACGCCTGCGCCATTCATATGATGAGCAA
------ACCTGCGGCGGTGAACAGGCTTGCGCCATCCATACGATAGGCGA
------ACCTGCGGCGGTGAACAGGCTTGCGCCATCCATACGATAGGCGA
GGAGCAGTCGGCGACAATGCACAAGCTTCTGCCATCCATGTTATCGGTAA
TGAGTGACCTGCGACAGCGAACATGTTTGTGCTATCCCTATGATAGGCAG
GGAGCGACCTGCCACAGCGAACATGCCTGTGCCATCCACATGATAGGCGA
GGGGCGA-------------------------------------------
GGTGCGA-------------------------------------------
GGTGCGA-------------------------------------------
GGTGCGA-------------------------------------------
GGAGAGAGCTGCGACATTGCACAC--ATGCG--ATTCTTGGGATGGGCAG
-------CGCGCGGCCGTCAGTACGCTTGTACCATCAATATAATAGGCAA
GGACCGACCTGCGACTGTGAAGACGCTTGTGCCATCCATATGGTAGGCAA
GGAGCGACCTGCGGGAGAAATCACGTTGTTCTTTTTCAGATGATCGGCGA
GGAGCGGCCTGCGGCAGTGCAGACG-------------------------
GAAGCAAGCTGCGACATTGGACACACTTGTGCCATCGAT-----------
AGAGCGACCTTCGACCGTGCACACGCTTGTGCCATCGATGGGACAAATAA
-GAGAGACCTGCGACAGTGAACACGTCTGTACCACCCATGCGATGGGGAG
GGCGCGACATGCGTCAGTAAACACGATGCTAGCATTCATATAATAGGTA-
GGGGCGGCCTGCGGCAGCGAGCACGCGTGTGCCGTCCATGTGGTGGGCAG
GGGGCGGCCTGCGGCAGCGAGCACGCGTGTGCCGTCCATGTGGTGGGCAG
GGGGCGGCCTGCGGCAGCGAGCACGCGTGTGCCGTCCATGTGGTGGGCAG
GGGGCGGCCTGCGGCAGCGAGCACGCGTGTGCCGTCCATGTGGTGGGCAG
GGGGCGGCCTGCGGCAGCGAGCACGCGTGTGCCGTCCATGTGGTGGGCAG
GGGCCAACCTGCGACAGCGAACATGTCTGTCTTGTCCATATGATGTGCAG
AGAGCAACCTACGACAAGGCACAGGTTTCGTACCTTCACAAAATGAGCAG
GGGGCCACCTGCGACTGCGCACACGTCTGCGCCATCCGTATGATGGGCAG
GGAGCGGCCTGCGGCAGTGCAGACG-------------------------
GGAGAGACCTGCGACAATGCACAGGTTTGTACCACTTATATGATCGGCAA
GGAGAGACCTGCGACAATGCACAGGTTTGTACCACTTATATGATCGGCAA
GCAGCGACCTGCAATCGTGCACACGTTAGTGCCATCCGTATGATCGGCAG
GCAGCGACCTGCAATCGTGCACACGTTAGTGCCATCCGTATGATCGGCAG
GCAGCGACCTGCAATCGTGCACACGTTAGTGCCATCCGTATGATCGGCAG
GGAGCGACCTGCCACAGCGAACATGCCTGTGCCATCCACATGATAGGCGA
GGAGCGACCTGCCACAGCGAACATGCCTGTGCCATCCACATGATAGGCGA
GGAGCGACCTGCGGCAGCGAACACGCTTGTACGATCCACACCATGGGCAG
GGAGCGACCTGCGGCAGCGAACACGCTTGTACGATCCACACCATGGGCAG
GGAGCGACCTGCGGCAGCGAACACGCTTGTACGATCCACACCATGGGCAG
GGGGCGGCCTGCGGCAGCGAGCACGCGTGTGCCGTCCATGTGGTGGGCAG
GGCGCCACTGGCGACGGTGAGCACGTCTGTGCCGTACACATGATGTGCAA
GGCGCCACTGGCGACGGTGAGCACGTCTGTGCCGTACACATGATGTGCAA
GGAGTGATCTGCGACATTGAACGCGCTTGCGCCAGCCGTGTGATGGGCAG
CGAGCGGGCTGTGAAAGCGAACACGCTTGTGTCATTCGCATGATAGGCGA
GGAGTGGCCTGCGGCGGTTGACACACTTGTGGCACTCATAGGATAGACAA
GGACCGACCTGCGACTGTGAAGACGCTTGTGCCATCCATATGGTAGGCAA
GGAGCCTCCTGCGACAGTGGATACACTTGTGCCATCCATGCGGTGGGCAG
GGAGCCTCCTGCGACAGTGGATACACTTGTGCCATCCATGCGGTGGGCAG
GGAGCCTCCTGCGACAGTGGATACACTTGTGCCATCCATGCGGTGGGCAG
GGAGCGACCTGCGACAGCGGATGTCTCTGCGCCACCCATATGGTGAGCAG
GGAGCGACCTGCGACAGCGGATGTCTCTGCGCCACCCATATGGTGAGCAG
GGAGCGACCTGCGACAGCGGATGTCTCTGCGCCACCCATATGGTGAGCAG
--------------------------------------------------
--------------------------------------------------
--------------------------------------------------
--------------------------------------------------
GAAACGGCATGCGACAGTGAACCCGTCCGCATCATCCGTATGATACCTAG
GGAGCGACCTGCGGCAATGAACACGCTTCCGCCATCCATTTGACGGGCAG
GGGGCCACCTGCGACTGCGCACACGTCTGCGCCATCCGTATGATGGGCAG
GGAGCGGCCTGCGGCAGTGCAGACGCCTGCG-------------------
GGAGCGGCCTGCGGCAGTGCAGACGCCTGCG-------------------
GGAGCGGCCTGCGGCAGTGCAGACGCCTGCG-------------------
GGAGCGGCCTGCGGCAGTGCAGACGCCTGCG-------------------
GGAGCGGCCTGCGGCAGTGCAGACGCCTGCG-------------------
GGGGCGGCCTGCGACTGCGCACACGTCTGCGCCATCCATATGATGGGCAG
GGGGCGGCCTGCGACTGCGCACACGTCTGCGCCATCCATATGATGGGCAG
GGGGCGGCCTGCGACTGCGCACACGTCTGCGCCATCCATATGATGGGCAG
GGGGCGGCCTGCGACTGCGCACACGTCTGCGCCATCCATATGATGGGCAG
GGAGCGACCTGCGACTGTGAACGCGTCTGCGCCATACACATGGTAGGCAA
GGTGGCACCCGCGAGGGGGGACACGCCGGTGCCACCCGTATGATGCGCAG
GGTGCCACCCG---------------------------TATGATGCGCAG
GGCGGCACCCGCGAGGGGGGACACGCCGGTGCCACCCGTATGATGCGCAG
GGCGGCACCCGCGAGGGGGGACACGCCGGTGCCACCCGTATGATGCGCAG
GGCGGCACCCGCGAGGGGGGACACGCCGGTGCCACCCGTATGATGCGCAG
GAAGCGGTCTGCGACGGTGC------------------------------
GGAGCGGCCTGCGACAGTGCACACGTCTGTACTGCGCACATGTCAGGCAA
GGAGCGAGCTGCGACAGTGAGCACATCTGTATCATCCATATGATAGGTAA
GGAGCGACCTGCGACGGTAAACACGTCTGTACCATCTACATGATGG-CAG
GGATCGAGTCGCGGCAGT--------------------------------
GGAGCGACCTGCGGCGGGGGAGAGGTTCGCAGGATCCACATGATGGGTAA
GGAGCGAGCTGCGGCGGTGAGCACGCCTGTGCCGTGCCTAGGATAGACAA
GGAGCGAGCTGCGGCGGTGAGCACGCCTGTGCCGTGCCTAGGATAGACAA
GGAGCGAGCTGCGGCGGTGAGCACGCCTGTGCCGTGCCTAGGATAGACAA
GGGGCAACCAGCAACACTTAACATGTTTGTGCCACTTACACGATAGTCAG
GGAGCGACCTGCGGCAGGGGAGAGGTTCGCAGGATCCACATGATGGGTAA
GGAGAGACCTGCGGCAGCGAGCACGCTTGTACCATTCATGTGATGGGCAG
GGAGAGACCTGCGGCAGCGAGCACGCTTGTACCATCCATGTGATGGGCAG
GGAGAGACCTGCGGCAGCGAGCACGCTTGTACCATCCATGTGATGGGCAG
--------------------------------------------------
--------------------------------------------------
GGAGGGACCCGCGGCCGTGATCATGCCTGCGCCATCCATTGGATAGGTAA
GCCGCGCCGGGTGGCAGCGAACGCGTCTGTGCCGTTCGCATGATGGGCGG
GCCGCGCCGGGTGGCAGCGAACGCGTCTGTGCCGTTCGCATGATGGGCGG
GCCGCGCCGGGTGGCAGCGAACGCGTCTGTGCCGTTCGCATGATGGGCGG
GCCGCGCCGGGTGGCAGCGAACGCGTCTGTGCCGTTCGCATGATGGGCGG
GCCGCGCCGGGTGGCAGCGAACGCGTCTGTGCCGTTCGCATGATGGGCGG
GCCGCGCCGGGTGGCAGCGAACGCGTCTGTGCCGTTCGCATGATGGGCGG
GGAGCGGCCTGCGACAGTGCACACGTCTGTACTGCGCACATGTCAGGCAA
GGAGCGACCTGCGACAGTGTGAACGTCTGTACCATCCATATGTTAGGCAG
GGAGGGACCTCGGACAGTGGACACGCTTTTGCCATGCACATGATGGGCAG
GGGGCGAGCTGCTACATTCAATACGTCGGCGTCGCCCATGTGGTGGGCAG
GGGGCGAGCTGCTACATTCAATACGTCGGCGTCGCCCATGTGGTGGGCAG
GGTGCGAGCTGCGGCACTGCACACGTGTGTACCATCCATGGGATGAGCAG
GGTGCGAGCTGCAGCACTGCACACGTGTGTACCATCCATGGGATGAGCAG
GGTGCGATCTGCGACAATGCACACATTTGTGTCATCCACATGTTAGGCAA
GGTGCGATCTGCGACAGTGCACACATTTGTGTCATCCACATGTTAGGCAA
GGTGCGATCTGCGACAGTGCACACATTTGTGTCATCCACATGTTAGGCAA
GGAGCGGCCCGCGACAGTGGGCAGGACTGTGCCATCCATATGCTGAGCAG
GGAGCGACCTGCGGCTGTGAAGACGCTTGTGCCATTCACGTGATAGATAG
AGAGCGGCCTGCGACTGTGCACACGCTTGTGCCATCCATACGGTAGGCAG
GGAGAAGTCTGTGGCAGTGCGTGCGTCTGTGCTGTGCGCATGACGGGCAT
GGAGTGAGCTGCCACAGTGCACAGTTTCGTACCATTCACAGGATGGGCAG
GGACCGAGCTGCGACAGTGACGATGCGTGCATCATCTGCGCGATGGGCAG
GGAGCGACCTGCGAAAGTGCACACGCTTGTACCATCCACACGATAGGCAG
GGAGCGAGCTGCGGCGGTGAGCACGCCTGTGCCGTGCCTA-GATAGACAA
GGAGCGAGCTGCGGCGGTGAGCACGCCTGTGCCGTGCCTA-GATAGACAA
GGAGTGACTCGCAACAGTGACCACGTCTGTCCCATCCACATGATGGGCGC
GGGGCGACAGGCAACAGTGCACACGTCCGAGCCATCCACATGATAGGCGA
AGGGCGACCTGCGCCCTTGAACACGCTTGTGCCATCCACATGATGTGCAG
AGGGCGACCTGCGCCCTTGAACACGCTTGTGCCATCCACATGATGTGCAG
GGAGGGACCTGCAGCAAGGCACACCTGCACACCGTCCATATGATGGGCAA
GGAGCGGCCCGCGACAGTGAGCAGGCCTGTGCCATACACATGATGGGCGA
GGAGCGGCCCGCGACAGTGAGCAGGCCTGTGCCATACACGTGATGGGCGA
GGAGCGGCCCGCGACAGTGAGCAGGCCTGTGCCATACACATGATGGGCGA
GGAGCGACATGCGACAGTGAGCACGCTTGTGCCATCCATATGATAGGCAA
GGAGCGACATGCGACAGTGAGCACGCTTGTGCCATCCATATGATAGGCAA
GGAGCGACCGGCGACGGTGAGCACTCTTGTGCCATCCATATGACAGGCAG
GGAGCGACCGGCGACGGTGAGCACTCTTGTGCCATCCATATGACAGGCAG
GGAGCGACCGGCGACGGTGAGCACTCTTGTGCCATCCATATGACAGGCAG
TGAGCGACCTGTGACAGCGTGAGCGCTTGTGCCATCCATACGATAGGCAC
TGAGCGACCTGTGACAGCGTGAGCGCTTGTGCCATCCATACGATAGGCAC
GGAGCGACGTTCGACGGTGCGCACGTCTGTGTCATCCACAAGATGGGCAG
GGAACCACCTGCGACAGTGAACAGTCTTGTACCATCTGTGTGATAGGCAG

TGCGTGTGCGTGTCTCGAGCGTATCTCGCGTGGTCCTCACCACCCATTGG
GGTGTCGGCGTGACTGGAACGTGCCCCACCTGGCCCTCACTGCCTACTGG
GGCGTCGACGTGACTCGAACGTATGTCGCCCGGCGCTCACTGCGTGCTGG
AGTTTGAGCGTGACTCGAGCGTATCCCACCCGGCCGTCACTGCCTGATGG
GGTTTCAGCGTGACTCTAACGTCTCGCC--CGGCATTGATACTCTAGGGG
AGTGTCAGCGCGACTCGCGCGCATCCCACCTGCCCCTCACGGCCTGCCAG
AGCGCCAGCGCCACTCGAGCGTGTGCCACCTGGCCCTTACCACCTCCTCG
AGTGTCCGCGTGACTTGAGCGTATTCCACCCGGCC-TCGCTGCCGGCTGG
CGTGCCAGCGTGACTGAAAGGT-TCTCACACGATCCTCACTGCCTACTGG
AGTGCCGACGTGACTCGAGCGTGTCTCA-CCGGCCCGTCCCACCTACTGG
GGTGTCGGCGTGACTCGTATGTATCCCACCCGGCCCGAGCCTCCCACTGG
TGTGTCAACGTGGCTGGAGCGTATCCCACTCGGCCCTCACTGCTTAGTGG
CGTGCCAGCGCGGCCC--------------------TCACGGCCCACTCG
GGTGTCCGCGCGACTGGAGACCATCCCATCCCGCCCTCACTGCCTACTGG
AGTGCCGGCGTGACGGGAACGCATCTCACCGGGCCCCCACGGCCCGCTGG
AGCGTCGACGTGACTCCGACGTACGCCACGCGGC--CAGCTGCCTACTGG
--------------------------------------------------
TGCGCGACCGCGGCTCGAGCGCATCGCAGCCGGCTCTCACTGCCCAC-GG
TGCGCGACCGCGGCTCGAGCGCATCGCAGCCGGCCCTCACTGCCCAC-GG
TGCGCGACCGCGGCTCGAGCGCATCGCAGCCGGCCCTCACTGCCCAC-GG
TGCGCGACCGCGGCTCGAGCGCATCGCAGCCGGCCCTCACTGCCCAC-GG
AGCGTGTCCGCGGCTCGAGCGCATCGCAGCCGGCCCTCACTGCCCAC-CC
AGCGTATCCGCGGCTCGAGCGCATCGCAGCCGGCCCTCACTGCCCAC-CC
AGCGTGTCCGCGGCTCGAGCGCATCGCAGCCGGCCCTCACTGCCCAC-CC
--------------------------------------------------
CGTGCCAGCGCGGCCC--------------------TCACGGCCCACTCG
GGTGCCCGTGCGACCCGGGCGTG-CCCAGCCG----TCGCTGCCTGCTGG
GGTGTCCGTGCGACCCGGGCGTG-CCAAGCCG----TCGCTGCCTGCTGG
GGCGGCGGCGTGACTCGAGCGTGTCCCACCCGCCCCTCAGTGTCCACTGG
GGCGGCGGCGTGACTCGAGCGTGTCCCACCCGCCCCTCAGTGTCCACTGG
AGTGTCACAGTGACTCAGATGTACCTCACATGCCCCTCACCGCCCACTGG
--------------------------------------------------
--------------------------------------------------
GGTGTCGGCGTGACTCGGGGGTGCCAAACTCAGCCTTCACTCCCAGCCAG
AGCGCCAGCGTGACTTGAGCGCGTCCCACTCGGCCCTCAGCC--TACTGG
AGCGCCAGCGTGACTTGAGCGCGTCCCACTCGGCCCTCAGCC--TACTGG
AGCGCCCGCGTGAGTCGGGCGTGTCTCCTTCGGGC-TCGCTGCCCACCGG
CGTGCCAGCGTGGTTGGAGCGTGTCTCCCCCGGGCCTCACCGCCTACCGC
CGTGCCAGCGTGGTTGGAGCGTGTCTCCCCCGGGCCTCACCGCCTACCGC
CGTGCCAGCGTGGTTGGAGCGTGTCTCCCCCGGGCCTCACCGCCTACCGC
CGTGCCAGCGTGGTTGGAGCGTGTCTCCCCCGGGCCTCACCGCCTACCGC
AGTGCCGACGTGACTCGAGCGTATCCCACCCGGCCCTCACTGCCTACTGG
AGTGCCGACGTGACTCGAGCGTATCCCACCCGGCCCTCACTGCCTACTGG
AGTGCCGACGTGACTCGAGCGTATCCCACCCGGCCCTCACTGCCTACTGG
AGTGCCGACGTGACTCGAGCGTATCCCACCCGGCCCTCACTGCCTACTGG
AGCGCCAGCGTCACTCGAGCGTGTCTCGCCCGGGCCCCACCGCCTGCTGA
AGCGCCAGCGTCACTCGAGCGTGTCTCGCCCGGGCCCCACCGCCTGCTGA
AGCGCCAGCGTCACTCGAGCGTGTCTCGCCCGGGCCCCACCGCCTGCTGA
AGTGTCGACGTGACTTGGACGCATCCCACCTGGC--CCACTGCCTGCTTG
AGTGTCGACGTGACTTGGACGCATCCCACCTGGC--CCACTGCCTGCTTG
AGTGTCAGCGTGGCTCGATTGCACCTCACCCGGC--TCCCTGCCTGCGGG
AGTGTCAGCGTGGCTCGATTGCACCTCACCCGGC--TCCCTGCCTGCGGG
AGTGTCAGCGTGGCTCGATTGCACCTCACCCGGC--TCCCTGCCTGCGGG
AGCGCCAGCGTCACTCGAGCGTGTCTCGCCCGGGCCCCACCGCCTGCTGA
AGTGTCAGCGTGGCTCGAGCGTATCCAACCCGGCCCTCACTGCCTA-T--
TGTGTCTGCGTCACGCGAACATATCTCACCCCCACACCACTCTCCACTGG
AGCGCCAGCGTCACTCGAGCGTGTCTCGCCCGGGCCCCACCGCCTGCTGA
AGTGTCAACGTGACTCGAACGTCTCACACCCGGCCCTCACTGCCTGCTGG
AGTGTCAACGTGACTCGAACGTCTCACACCCGGCCCTCACTGCCCGCTGG
AGCGTCAGCGTGGCTCGAACGCACGCCGCACGGCCCTCACTGGCCACTGG
-AGGTGA-C-TGGCTGAAGCGTTCTACAGCGCG---TGTGTGCCTAGGGC
GATGTGCGCGTGCCTCGAACCTATCCCACCCGGCCTTCCGTGCCCACTGC
GATGTGCGCGTGCCTCGAACCTATCCCACCCGGCCTTCCGTGCCCACTGC
GGTGTGCGCGTGCCTCGAACCTATCCCACCCGGCCTTCCGTGCCCACTGC
AGTGTCCGCGCGCCTCGAACCTATCCCACCCGGCCTTCCGTGCCCACTGC
AGTGTCCGCGCGCCTCGAACCTATCCCACCCGGCCTTCCGTGCCCACTGC
AGCGTCAGCGTGGCTCGAACGCACGCCGCACGGCCCTCACTGGCCACTGG
AGCGTCAGCGTGGCTCGAACGCACGCCGCACGGCCCTCACTGGCCACTGG
AGCGTCAGCGTGGCTCGAACGCACGCCGCACGGCCCTCACTGGCCACTGG
GGTGTGCGCGTGCCTCGAACCTATCCCACCCGGCCTTCCGTGCCCACTGC
CGGGCCAATGCAACCCGAACCTATTGCACCCGGCTGTCACTGCCCACCGC
AGCGGCCGCGTGACTCGAACGTATCCCACCCCGTTCTCAGCACTCACTGT
AGCGTCAGCGTGACT-GAACACCACCCACCCGACTCTCACTGTCTGCTCG
AGTGTCCGCGTGGCTCGAGCGTATGCCACCCGGCCCTCACCGCCTGCTGG
AGTGTCCGCTTGACTGGAGCGTATTCCG--------TCACTCAGTCCTGG
AGTGTGACAGTGACTTGAGCGTATTCTACCTGGATCTCACTGCCTACTGG
AGTACCAGCGCGACTCGGACGCGTCTCACTCGGCCTTCACTGCCTACTGG
AGTACCAGCGCGACTCGGACGCGTCTCACTCGGCCTTCACTGCCTACTGG
AGTACCAGCGCGACTCGGACGCGTCTCACTCGGCCTTCACTGCCTACTGG
AGTACCAGCGCGACTCGGACGCGTCTCACTCGGCCTTCACTGCCTACTGG
AGTACCAGCGCGACTCGGACGCGTCTCACTCGGCCTTCACTGCCTACTGG
AGTACCAGCGCGACTCGGACGCGTCTCACTCGGCCTTCACTGCCTACTGG
AGTGTCCGCGTGGCTCGAGCGTATGCCACCCGGCCCTCACCGCCTGCTGG
CGTGGCGACGTGGCTGGGGCGTCTGTCCCTCGGCCCTCGCGGCCCGCCGG
AGTGTCCGCGTGGCTCGAGCGTATGCCACCCGGCCCTCACCGCCTGCTGG
AGTGTCCGCGTGGCTCGAGCGCATGCCACCCGGCCCTCACCGCCTGCTGG
CGTGGCGACGTG-CTGGGGCGTCTGTCCCTCGGCCCTCGCGGCCCGCCGG
AGTGTCCGCGTGGCTCGAGCGTATGCCACCTGGCCCTCGCCGCCTGCTGG
AGTGTCCGCGTGGCTCGAGCGTATGCCACCTGGCCCTCGCCGCCTGCTGG
AGTGCCAGCGCGACATCAGCGTATCCCACACGGCCCTCGCAGCCTACAGA
AGTGTCCGCGTGGCTCGAGCGCCTGCCACCCGGGCCTTACCGCCTGCTGG
TGTGCCAGTGCGACTCGAACGCGTCTCACAAGGCCC------ACTGCTGG
TGTGCCAGTGCGACTCGAACGCGTCTCACAAGGCCC------ACTGCTGG
AGCGTCACCGCTCCT-GAGCGTATCTCAGCCGCACC--------------
GGTGTCCACGTGGCCCGCGCGTATCCGACCTGGCCCTCACGGCGCACGTG
GGTGTCCACGTGGCCCGCGCGTATCCGACCTGGCCCTCACGGCGCACGTG
GGTGTCCACGTGGCCCGCGCGTATCCGACCTGGCCCTCACGGCGCACGTG
GGTGTCCACGTGGCCCGCGCGTATCCGACCTGGCCCTCACGGCGCACGTG
GGTGCCCACGTGGCCCAAACGTGTCCCAGCTGGCCCCCACTGCCCACTGG
GGTGCCCACGTGGCCCAAACGTGTCCCAGCTGGCCCCCACTGCCCACTGG
GGTGCCCACGTGGCCCAAACGTGTCCCAGCTGGCCCCCACTGCCCACTGG
GGTGCCCACGTGGCCCAAACGTGTCCCAGCTGGCCCCCACTGCCCACTGG
GGTGTCCACGTGGCCCGCGCGTATCCGACCTGGCCCTCACGGCGCACGTG
GGTGTCCACGTGGCCCGCGCGTATCCGACCTGGCCCTCACGGCGCACGTG
AGTGCCAGCATGACTGGAACGCATCTCG-CTGGCCCTCTCCCCCTA-GTG
CGTGTGAGGGCGACTCGAGCGTATGCC---------CCACGGCCCACTGG
CGTGTGAGGGCGACTCGAGCGTATGCC---------CCACGGCCCACTGG
--------------------------------------------------
--------------------------------------------------
--------------------------------------------------
--------------------------------------------------
CGTGTCAGGGCGACTCGAGCGTATGCCTCCGGGCCCTCACAGCCCACTGA
CGTGTCAGGGCGACTCGAGCGTATGCCTCCGGGCCCTCACAGCCCACTGA
CGTGTCAGGGCGACTCGAGCGTATGCCTCCGGGCCCTCACAGCCCACTGA
CGTGTCAGGGCGACTCGAGCGTATGCCTCCGGGCCCTCACAGCCCACTGA
CGCGTCAGGGCGACTCGAGCGTATGCCACCCGGCCCTCACGGCCCACTGA
CGCGTCAGGGCGACTCGAGCGTATGCCACCCGGCCCTCACGGCCCACTGA
CGCGTCAGGGCGACTCGAGCGTATGCCTCCCGGCCCTCACGGCCCACTGA
--------------------------------------------------
--------------------------------------------------
--------------------------------------------------
AGTGCCAGCGCAATTCGAGCGTATCCCACCTGGTCCTCGCTGCCTGCTGG
AGTGTCCGCGTGACTCGAACGTGTCTCCCCCGGCTCTCACCACCCACTGA
AGCCTTCAAGCAACTCGAACGCACCCCACCCTGTCCTCACTGCTTGCTGG
AGCCTTCAAGCAACTCGAACGCACCCCACCCTGTCCTCACTGCTTGCTGG
AATGCCGGCGCAATTCGAACGCATCCCGTTCGGCCATCACTGCCTGCTGG
AATGCCGGCGCAATTCGAACGCATCCCGTTCGGCCATCACTGCCTGCTGG
AGTGCCAGTGCCACTTGCACGCCTCTCACCCGTCCATTACTGCCTCCTGG
AGTGTCCGCGTGGCTCGAGCGTATGCCACCCGGCCCTCACCGACTGCTGG
AATGCCGGCGCAATTCGAACGCATCCCGTTCGGCCATCACTGCCTGCTGG
AATGCCGGCGCAATTCGAACGCATCCCGTTCGGCCATCACTGCCTGCTGG
AATGCCGGCGCAATTCGAACGCATCCCGTTCGGCCATCACTGCCTGCTGG
AGTGTCGACGCCACTGCAATGCATCTCACCCCGCCCTGGCTGCCTGCAGG
AGTGTCGACGCCACTGCAATGCATCTCACCCCCCCCTGGCTGCCTGCAGG
AGTGTCCGCGTGACTCGAACGTGTCTCCCCCGGC--TCGCACCACCCACT
AGTGTCGACGCCACTGCAATGCATCTCACCTCGCCCTGGCTGCCTGCAGG
AGTGTCGACGCCACTGCAATGCATCTCACCTCGCCCTGGCTGCCTGCAGG
AGTGTCGACGCCACTGCAATGCATCTCACCTCGCCCTGGCTGCCTGCAGG
AGTGTCGACGTCACTGCAATGCATCTCA-CCCCCCCTGGCTGCCTGCAGG
AGTGTCGACGCCACTGCAATGCATCTCACCCCGCCCTGGCTGCCTGCAGG
AGTGTCGACGCCACTGCAATGCATCTCACCCCGCCCTGGCTGCCTGCAGG
AGTGTCGACGCCACTGCAATGCATCTCACCCCCCCCTGGCTGCCTGCAGG
--------------------------------------------------
--------------------------------------------------
--------------------------------------------------
--------------------------------------------------
AGCC----------------------------------------------
AGTGCCCGCGTGACTCGAACGCACCCTACCCGGCCCTCACGGCCCAGCGG
AGTGCCCGCGTGACTCGAACGCACCCTACCCGGCCCTCACGGCCCAGCGG
CGTGTCAGCGTGACTGCAACGTACCCCACCCGGCAT--------------
GGTGTGGGCGCGGCTCGAGCGTATCCCACCCGGCACTCCTTGCCTACTGG
GGTGTGGGCGCGGCTCGAGCGTATCCCACCCGGCACTCCTTGCTTACTGG
GGTATGGGCGCGGCTCGAGCGTATCCCACCCGGCACTCCTTGCCTACTGG
GGTGTGGGCGCGGCTCGAGCGTATCCCACCCGGCACTCCTTGCCTACTGG
GGTGTGGGCGCGGCTCGAGCGTATCCCACCCGGCACTCCTTGCCTACTGG
CGTGTCCGCGCGACCCGAGCGTATCTGACCCGGCCCTCACTGCCTACTGG
CGTGTCCGCGCGACCCGAGCGTATCTGACCCGGCCCTCACTGCCTACTGG
TGTGTCGGCGTGACTCGAGCGTATCCCACCCGGCCCTCACCGCCTAGTGG
TGTGTCGGCGTGACTCGAGCGTATCCCACCCGGCCCTCACCGCCTAGTGG
TGTGTCGGCGTGACTCGAGCGTATCCCACCCGGCCCTCACCGCCTAGTGG
TGTGTCGGCGTGACTCGAGCGTATCCCACCCGGCCCTCACCGCCTAGTGG
TGTGTCGGCGTGACTCGAGCGTATCCCACCCGGCCCTCACCGCCTAGTGG
GGGGTCAACGGGGCTCGGGCGTCTCCCGCCCGGCCCT-GCTGCCTGCTGG
AGTGTCCAGGGGACTCGAACATATCCCGCCCGGCCCTCCACCCACTTCTG
--------------------------------------------------
--------------------------------------------------
AGTATCAGCGTGACTCGAGCGCATCTCACCAGGCCCCTAATGCCTGTTGG
AGTATCAGCGTGACTCGAGCGCATCTCACCAGGCCCCTAATGCCTGTTGG
AACGTAAGCATGACTCAAGCGTGTAACACCCGGCCCTCGCATCGTGCTGG
AACGTAAGCGCGACTCAAGCGTGTAACACCCGGCCCTCGCATCGTGCTGG
AGTGTCAGGGTGGCTCGAACTCATCTTGCCCAGCTC--------------
AGCGTTAGCGTGGCTTGAACGCATCTCGCCCAGCCC--------------
CGTGTCGGTGTGAGTGGAATTTACATTTCCTGGCCCTCCACCTATG-ATG
GGGGTCAACGGGGCTCGGGCGTCTCCCGCCCGGCCCT-GCTGCCTGCTGG
GGGGTCAACGGGGCTCGGGCGTCTCCCGCCCGGCCCT-GTTGCCTGCTGG
GGGGTCAACGGGGCTCGGGCGTCTCCCGCCCGGCCCT-GCTGCCTGCTGG
GGGGTCAACGGGGCTCGGGCGTCTCCCGCCCGGCCCT-GCTGCCTGCTGG
GGGGTCAACGGGGCTCGGGCGTCTCCCGCCCGGCCCT-GTTGCCTGCTGG
GGGGTCAACGGGGCTCGGGCGTCTCCCGCCCGGCCCT-GCTGCCTGCTGG
GGGGTCAACGGGGCTCGGGCGTCTCCCGCCCGGCCCT-GCTGCCTGCTGG
AGCGTCAGCGTGACTCGAACGCACCTCACCCTGC--TCGGTGCCCATTGG
--------------------------------------------------
AGTGTCCGCGT-ACTCGAACGCGTCCCACCCGGCTTTCACTGCCCACTGG
AGTGTCCGCGT-ACTCGAACGCGTCCCACCCGGCTTTCACTGCCCACTGG
AGTGTCCGCGT-ACTCGAACGCGTCCCACCCGGCTTTCACTGCCCACTGG
A-TGTCATCGCGACTCAAGCGTGTCCCACCCGGCCCTCCGTGCCCACCGC
AGTCTCCGCGCGACTGGAACGCATCCCGCCCGACGCTCACTGCCTACTGG
AGTCTCCGCGTGACTGGAACGCATCCCGCCCGACGCTCACTGCCTACTGG
AGTGTCAGCGTGACTCGAGCGTATCTCACGCGGTTCTCACTGCCCACTGG
----TCAGCGTGACTCGAGCGCATCCCGCCCGGCCCTCACTGCCCTTTGG
AGTCTCCGCGTGACTGGAACGCATCCCGCCTGACGCTCACTGCCTACTGG
AGTCTCCGCGTGACTGGAACGCATCCCGCCCGACGCTCACTGCCTACTGG
AGTCTCCGCGTGACTGGAACGCATCCCGCCCGACGCTCACTGCCTACTGG
AGTCTCCGCGTGACTGGAACGCATCCCGCCCGACGCTCACTGCCTACTGG
AGTCTCCGCGTGACTGGAACGCATCCCGCCTGACGCTCACTGCCTACTGG
ATTGTGAGAGTGACTCGAACGTCTCTCACCCGGTCGTCTACCCACATTAA
AGTGCCGGCGTGACGGGAACGCATCTCACCGGGCCCCCACGGCCCACTGG
AGCGTCGGCGTGACTCCGACGTACGCCACGCGGCCATGGCTGCCTACTGG
AGCGTCGGCGTGACTCCGACGTACGCCACGCGGCCATGGCTGCCTACTGG
AGCGTCGGCGTGACTCCGACGTACGCCACGCGGCCATGGCTGCCTACTGG
AGCGTCGGCGTGACTCCGACGTACGCCACGCGGCCATGGCTGCCTACTGG
AGTGCCGGCGTGACGGGAACGCATCTCACCGGGCCCCCACGGCCCGCTGG
GGCGTCAACGTGA-------------------------------------
AGTGTCAACCGGGCCGAAACGCATCTTACAAGCCCCTCACCGCCTCCTGG
-------GTGTGACTTGAACACACCCCACCTGGACCTCAATGCCTACTGG
-------GTGTGACTTGAACACACCCCACCTGGACCTCAATGCCTACTGG
CGTGTCAGCGTGACTCGAGCGTACCCCACCTGGCCCTCACTGCCTGCTGG
CGTGTCAGCGTGACTCGAGCGTACCCCACCTGGCCCTCACTGCCTGCTGG
CGTGTCAGCGTGACTCGAGCGTACCCCACCTGGCCCTCACTGCCTGCTGG
CGTGTCAGCGTGACTCGAGCGTACCCCACCTGGCCCTCACTGCCTGCTGG
CGTGTCAGCGTGACTCGAGCGTACCCCACCTGGCCCTCACTGCCTGCTGG
CGTGTCAGCGTGACTCGAGCGTACCCCACCTGGCCCTCACTGCCTGCTGG
CGTGTCAGCGTGACTCGAGCGTACCCCACCTGGCCCTCACTGCCTGCTGG
CGTGTCAGCGTGACTCGAGCGTACCCCACCTGGCCCTCACTGCCTGCTGG
AGTGCCGGCGTGACGGGAACGCATCTCACCGGGCCCCCACGGCCCACTGG
AGTGCCGGCGTGACGGGAACGCATCTCACCGGGCCCCCACGGCCCGCTGG
AGCGCCAACC-GACTCGAGCGTATCCCGCCCGGCCCTGACTGCCTGCTGG
AGCGCCAACC-GACTCGAGCGTATCCCGCCCGGCCCTGACTGCCTGCTGG
AGCGCCAACC-GACTCGAGCGTATCCCGCCCGGCCCTGACTGCCTGCTGG
AGCGCCAACC-GACTCGAGCGTATCCCGCCCGGCCCTGACTGCCTGCTGG
AGCGCCGACC-GACTCGAGCGTATCCCGCCCGGCCCTGACTGCCTGCTGG
AGCGCCGACC-GACTCGAGCGTATCCCGCCCGGCCCTGACTGCCTGCTGG
AGCGCCAACC-GACTCGAGCGTATCCCACCCGGCCCTGACTGCCTGCTGG
AGTGTCGGCGTGACTCGAACGCATCTCGCCCGGCCCTCACTGCCCACTGG
AGTGTCGGCGTGACTCGAACGCATCTCGCCCGGCCCTCACTGCCCACTGG
AGCGTCAGCGCGACTCGAGCATATCCCATGCGACCCTCACTGCCTACTGG
AGTGTCGGCGTGACTCGAACGCATCTCGCCCGGCCCTCACTGCCCACTGG
AGTGCCGGCGTGACTCGAACGCATCCCACCCGGCCCTCACTGTCTGCTGC
AGTGCCGGCGTGACTCGAACGCATCCCACCCGGCCCTCACTGTCTGCTGC
TGCGACCATGCGCCTCGAGCGTATCCCACCCGGCCCTCACTGCCTACTGC
TGCGACCATGCGCCTCGAGCGTATCCCACCCGGCCCTCACTGCCTACTGC
TGCGACCATGCGCCTCGAGCGTATCCCACCCGGCCCTCACTGCCTACTGC
--------------------------------------------------
TGCGACCATGCGCCTCGAGCGTATCCCACCCGGCCCTCACTGCCTACTGC
--------------------------------------------------
--------------------------------------------------
--------------------------------------------------
--------------------------------------------------
--------------------------------------------------
GGTGCCAGCGTGACTCGGACGCGTCGCACCCGGCCCTCACTGCCTGCTGG
GGTGCCAGCGTGACTCGGACGCGTCGCACCCGGCCCTCACTGCCTGCTGG
GGTGCCAGCGTGACTCGGACGCGTCGCACCCGGCCCTCACTGCCTGCTGG
TGCGACCATGCGCCTCGAGCGTATCCCACCCGGCCCTCACTGCCTACTGC
GGTGCCAGCGTGACTCGGACGCGTCGCACCCGGCCCTCACTGCCTGCTGG
AGTGCCAGCGTGGCTCGAAGGCATCTCACCCGACCCTCGCTGCACGCTGG
AGTGCCAGCGTGGCTCGAAGGCATCTCACCCGACCCTCGCTGCGCGCTGG
AGTGCCAGCGTGGCTCGAAGGCATCTCACCCGACCCTCGCTGCGCGCTGG
AGTGCCAGCGTGGCTCGAAGGCATCTCACCCGACCCTCGCTGTGCGCTGG
AGTGCCAGCGTGGCTCGAAGGCATCTCACCCGACCCTCGCTGCGCGCTGG
GTGGCGAGCGTGGCTGGGGCGCCTCTCCCTCGGCCCTCGCGGCCCGCCGG
GTGGCGAGCGTGGCTGGGGCGCCTCTCCCTCGGCCCTCGCGGCCCGCCGG
GTGGCGAGCGTGGCTGGGGCGCCTCTCCCTCGGCCCTCGCGGCCCGCCGG
GTGGCGAGCGTGGCTGGGGCGCCTCTCCCTCGGCCCTCGCGGCCCGCCGG
GTGGCGAGCGTG-CTGGGGCGCCTCTCCCTCGGCCCTCGCGGCCCGCCGG
GGCGCCAGCGCGACTCGAACACATCCCACCCGCCA-TCGCTGCCCACTCG
AGTGCCAGCGTGGCTCGAAGGCATCTCACCCGACCCTCGCTGTGCGCTGG
GGCGCCAGCGCGACTCGAACACATCCCACCCGCCA-TCGCTGCCCACTCG
GGCGCCAGCGCAACTCGAACACATCCCACCCGCCA-TCGCTGCCCACTCG
GGCGCCAGCGCGACTCGAACACATCCCACCCGCCA-TCGCTGCCCACTCG
GGCGCCAGCGCGACTCGAACACATCCCACCCGCCA-TCGCTGCCCACTCG
GGCGCCAGCGCGACTCGAACACATCCCACCCGCCA-TCGCTGCCCACTCG
GGCGCCAGCGCGACTCGAACACATCCCACCCGCCA-TCGCTGCCCACTCG
GGCGCCAGCGCGACTCGAACACATCCCACCCGCCA-TCGCTGCCCACTCG
GGCGCCAGCGCGACTCGAACACATCCCACCCGCCA-TCGCTGCCCACTCG
GGCGCCAGCGCGACTCGAACACATCCCACCCGCCA-TCGCTGCCCACTCG
GT-GCCAGCGTGGCTCGAAGGCATCTCACCCGACCCTCGCTGCGCGCTGG
GT-GCCAGCGTGGCTCGAAGGCATCTCACCCGACCCTCGCTGCGCGCTGG
--------------------------------------------------
-------------------------------------CACTGCCTACTGG
-------------------------------------CACTGCCTACTGG
--CGTCC-------------------------------------------
ACTGTCAGCGCTATTCGAGCGCGTTGCTCCTTCTCC--------------
GGTGCCCACGTGACTCGACCGTGTCTCGCCTGGCCCTCACGGCCCACTGG
GGTGCCCGCGTGACTCGACCGTGTCTCGCCTGGCCCTCACGGCCCACTGG
GGTGCCCGCGTGACTCGACCGTGTCTCGCCTGGCCCTCACGGCCCACTGG
GGTGCCCGCGTGACTCGACCGTGTCTCGCCTGGCCCTCACGGCCCACTGG
GGTGCCCGCGTGACTCGACCGTGTCTCGCCTGGCCTTCACGGCCCACTGG
GGTGCCCGCGTGACTCGACCGTGTCTCGCCTGGCCCTCACGGCCCACTGG
CGTGTCAGCGCGACTCAAGCGCATCGTACCCGGCCCTCACTGCCTCCTGG
CGTGTCAGCGCGACTCAAGCGCATCGTACCCGGCCCTCACTGCCTCCTGG
CGTGTCGGCGTCGATCGAACGTATCCCACCCGGCCCTCACTGCCTACTGG
CGTGTCGGCGTCGATCGAACGTATCCCACCCGGCCCTCACTGCCTACTGG
AGCGTCAGCGTGGCTCGAGCGTCTCCCACCCCGCCCCCACTGCCCACTGG
AGCGTCAGCGTGGCTCGAGCGTCTCCCACCCCGCCCCCACTGCCCACTGG
AGCGTCAGCGTGGCTCGAGCGTCTCCCACCCCGCCCCCACTGCCCACTGG
GGTGCCCGCGTGACTCGACCGTGTCTCGCCTGGCCCTCACGGCCCACTGG
AGCGTCAGCTTCACTCGAGTGTATCCCACCCGGCCCTCACTGCCCATGGA
AGCGTCAGCTTCACTCGAGTGTATCCCACCCGGCCCTCACTGCCCATGGA
CGTGTGAAGGTGGCTCGGGCGTATCACGCGCGGCCCTGACTGGGTAGCTG
CGTGTGAAGGTGGCTCGGGTGTATCACGCGCGGCCCTGACTGGGTAGCTG
CGTGTGAAGGTGGCTCGGGCGTATCACGCGCGGCCCTGACTGGGTAACTG
CGTGTGAAGGTGGCTCGGGTGTATCACGCGCGGCCCTGACTGGGTAGCTG
--------------------------------------------------
--------------------------------------------------
--------------------------------------------------
--------------------------------------------------
TGTGTCTGCGTCACGCGAACATATCTCACACAGACCGGACTCTCCACTGG
AGCGCCCGCGTGACTCGAACCCATCTCACCCGGACCTCACACTGCACCGG
AGCGCCCGCGTGACTCGAACCCATCTCACCCGGACCTCACACTGCACCGG
AGTGTGGGCGTGACTCGAGCGTATCTCGCCCGGCCCTCACTGCCTGCTGG
AGTGTGGGCGTGACTCGAGCGTATCTCGCCCGGCCCTCACTGCCTGCTGG
AGTGTGGGCGTGACTCGAGCGTATCTCGCCCGGCCCTCACTGCCTGCTGG
AGTGTGGGCGTGACTCGAGCGTATCTCGCCCGGCCCTCACTGCCTGCTGG
CGTGTCAGCGTGACTCGAGCGTATCTCGCCCGGCCCTCACTGCCTGCTGG
CGTGTCAGCGTGACTCGAGCGTATCTCGCCCGGCCCTCACTGCCTGCTGG
------------ACTCGAACGTATCCCACCCGACCCTCACTGCCTACCGG
------------ACTCGAACGTATCCCACCCGACCCTCACTGCCTACCGG
------------ACTCGAACGTATCCCACCCGACCCTCACTGCCTACCGG
------------ACTCGAACGTATCCCACCCGACCCTCACTGCCTACCGG
------------ACTCGAACGTATCCCACCCGACCCTCACTGCCTACCGG
AGTGTCCGCGTGACTCGAGCGTGTCGCA--GGGTCCTCGCTGCCTACTGG
AGTGTCCGCGTGACTCGAGCGTGTCGCA--GGGTCCTCGCTGCCTACTGG
AGTGTCCGCGTGACTCGAGCGTGTCGCA--GGGTCCTCGCTGCCTACTGG
AGTGTCCGCGTGACTCGAGCGTGTCGCA--GGGTCCTCGCTGCCTACTGG
AGTGTCCGCGTGACTCGAGCGTGTCGCA--GGGTCCTCGCTGCCTACTGG
AGTGTCCGCGTGACTCGAGCGTGTCGCA--GGGTCCTCGCTGCCTACTGG
TGCGCCAGCCTGACTCGCACCCCTCACC--AGGTCCTCACTGCCTGCTGG
TGCGCCAGCCTGACTCGCACCCCTCACC--AGGTCCTCACTGCCTGCTGG
TGCGCCAGCCTGACTCGCACCCCTCACC--AGGTCCTCACTGCCTGCTGG
TGCGCCAGCCTGACTCGCACCCCTCACC--AGGTCCTCACTGCCTGCTGG
----------TGACTTGAGCGTATCCCACACGGTCCTCCTTGTCCAGTGG
AGCGCCAGCGTGGC-CAAACGAATCTAACCCGGGCATCATTTCTCCTTCG
AGCGCCAGCGTGACGCGAGCATATCCCACCCGGCCCTCGCTGCCTACAGC
--------------------------------------------------
--------------------------------------------------
AGTGTCGGCGCGCCTGGAGCGCATCTCAGCCGGCCCTGTGTGC-TGGTGG
AGTGTCGGCGCGCCTGGAGCGCATCTCAGCCGGCCCTGTGTGC-TGGTGG
CGTGTCAGTGTGACGCGAGCACATCCCACCTGGCCCTCGCTGCCTACAGA
CGTGTCAGTGTGACGCGAGCACATCCCACCTGGCCCTCGCTGCCTACAGA
CGTGTCAGTGTGACGCGAGCACATCCCACCTGGCCCTCGCTGCCTACAGA
AGCGCCAGCGTGACGCGAGCGTATCCCACCCGGCCCTCGCTGCCTACAGC
AGCGCCAGCGTGACGCGAGCGTATCCCACCCGGCCCTCGCTGCCTACAGC
AGCGCCAGCGTGACGCGAGCGTATCCCACCCGGCCCTCGCTGCCTACAGC
AGTGTCGGCGCGCCTGGAGCGCATCTCAGCCGGCCCTGTGTGC-TGGTGG
AGCGCCAGCGTGACGCGAGCGTATCCCACCCGGCCCTCGCTGCCTACAGC
AGCGCCAGCGTGACGCGAGCGTATCCCACCCGGCCCTCGCTGCCTACAGC
ACTTTCGGCATGGCT--AGCGTATTTCGCTTCGCCCTCACTGCCTACTAG
AGCGTCAGTGTGGCTTGAACGCATCTCACCAACCCCTCACTGCCCACTGG
--------------------------------------------------
AGCGTCATCGTGACCCGAGCGTCTCCCACCGGGCCCTCACCGCCCACTGG
AGCGTCATCGTGACCCAAGCGTCTCCCACCGGGCCCTCACCGCCCACTGG
AGCGTCATCGTGACCCGAGCGTCTCCCACCGGGCCCTCACCGCCCACTGG
AGCGTCATCGTGACCCGAGCGTCTCCCACCGGGCCCTCACCGCCCACTGG
--------------------------------------------------
--------------------------------------------------
--------------------------------------------------
AGTGCCACGACTATTCAAAGGTATCCCATTCGGCCCTCCGTGCCTCCTGG
--------------------------------------------------
--------------------------------------------------
--------------------------------------------------
AGTGCCACGACTATTCAAAGGTATCCCATTCGGCCCTCGGTGCCTCCTGG
AGCGTCATCGTGACCCGAGCGTCTCCCACCGGGCCCTCACCGCCCACTGG
AGCGTCATCGTGACCCGAGCGTCTCCCACCGGGCCCTCACCGCCCGCTGG
AGCGTCATCGTGACCCGAGCGTCTCCCACCGGGCCCTCACCGCCCACTGG
AGCGTCATCGTGGCCCGAGCGTCTCCCACCGGGCCCTCACCGCCCACTGG
AATGCCAGCGTGACTCGGACGTCTCCCACCCGACCCTCACTGCCCAGTGG
AATGCCAGCGTGACTCGGACGTCTCCCACCCGACCCTCACTGCCCAGTGG
AATGCCAACGTGACTTGGACGCGTCTCACCCGGCCCTCGCTGTCTACTGG
AATGCCAACGTGACTTGGACGCGTCTCACCCGGCCCTCGCTGTCTACTGG
AGTGTCCGCGTGACTCGAACGTGCCTCACCCGGCCCTCACTGCGTACTGG
AGTGCCAGCGTGGCTCGAGCGTCTCTCGCCCGGCCCTCTCGGCTTACTGG
AGCGTCATCGTGACCCGAGCGTCTCCCACCGGGCCCTCACCGCCCACTGG
GCTGTCAGCGTGGCTTGCGCGCATCCCCTGCGGCCCTCACTGCCTACTGG
GCTGTCAGCGTGGCTTGCGCGCATCCCCTGCGGCCCTCACTGCCTACTGG
GCTGTCAGCGTGGCTTGCGCGCATCCCCTGCGGCCCTCACTGCCTACTGG
--------------------------------------------------
AGTGTCAGCGCGACCCGTGCGTACCCAACCCGGCCTTCGCTGATTACTGG
CGTATCAGCGTGACTCGAGCGCATCCCACCCGGCCCTCACCGCCTACTGA
AATGGAAGCGTGACTCGAGCGTATCTCACTCGGGCATGGCTGCCTCCTGG
AGTGGCAGCGTGACTCGAGCGTATCTCACTCGGGCATGGCTGCCTCCTGG
AGTGGCAGCGTGACTCGAGCGTATCTCACTCGGGCATGGCTGCCTCCTGG
AGTGTCAGCGCGACCCGTGCGTACCCAACCCGGCCTTCGCTGATTACTGG
AGTGTCAGCGCGACCCGTGCGTACCCAACCCGGCCTTCGCTGATTACTGG
AGTGTCAGCGCGACCCGTGCGTACCCAACCCGCCCC--------------
AGGTTCAGCGTGACTCGGACCTATTCCACCCGACCCTCGCTGCCTACTGA
AGCGTCAGCGTGACT-GA----ACACCACCCGACTCTCACTGTCTGCTCG
AGTACCAGCTTGGCGCACAGGTATCTCACCCGACCCTCTCCCGCGACTGG
AGCGTCTGCGTTAATTAAGCGTCTCCCGCCCGGCCCTCACGGCCTACTGG
AGTGTCAACAAGACTTGAATGCGTCCCACCGGGCCCTCACTGCCTACTGG
AGTGTCCGCGTGACTCGAGCGTATCCCACCCGACCCTCACTGCCTGCTGG
AGTGTCCGCGTGACTCGAGCGTATCCCACCCGACCCTCACTGCCTGCTGG
AGTGTCCGCGTGACTCGAGCGTATCCCACCCGACCCTCACTGCCTGCTGG
AGTGTCCGCGTGACTCGAGCGTATCCCACCCGACCCTCACTGCCTGCTGG
AGTGTCAACAAGACTTGAATGCGTCCCACCGGGCCCTCACTGCCTACTGG
CGTGCCAGCGTGACTGGAACGTATCCCACCCGGCCTTCACTGCCTACTGG
AGTGCCAGCGTGACTGGAACGCCTCACA-TCAGCCCTCACTGCCTACTG-
AGTGTC-GCCTGACTCGAGCGTATCCAACCCGGTCCTCACGGCTTACTGG
AGTGT-AGCGTGACTCGAACGCATGCCCCCTGGCCCTCTGCCGTTGCTGG
AGTGT-AGCGTGACTCGAACGCATGCCCCCTGGCCCTCTGCCGTTGCTGG
CGTGCCAGCGTGACTTGCGCGTATGCCACCCCGCCCTCACTGCTCACTGG
TGTATCAAGGCGACTCGAGCGTGTCCCACCAGGTCCTCACTGCCACCTGG
TGTATCAAGGCGACTCGAGCGTGTCCCACCAGGTCCTCACTGCCACCTGG
TGTATCAAGGCGACTCGAGCGTGTCCCACCAGGTCCTCACTGCCACCTGG
AGTGTCCGCACGACTCGAGCGTATCCCACCCGGCCCTCACTGCCCACGAG
AGTGTCCGCACGACTCGAGCGTATCCCACCCGGCCCTCACTGCCCACGAG
AGCGTCAGCGTGACTCGAATACATCTCACCTGGCCCTCGCTGCCTACCTG
AGTGTCCGCTTGACTCAAGCGTATCCTACCCGGCCCTCACTGCGTGCTGA
AGTGTCCGCTTGACTCAAGCGTATCCCCCCCGGCCCTCACTGCGTGCTGA
AGTGTCCGCGTGACTCAAGCGCATCCCCCCCGGCCACCACGGCTTACTGG
AGTGTCCGCGTGACTCAAGCGCATCCCCCCCGGCCACCACGGCTTACTGG
AGTGTCAGCACCACTCACGCGCATCCCATCCGGCCCTCACGGCTTCCCAG
AGGTTCAGCGTGACTCGAACGTATTTCACCTGGCCTTCACGGCTTACCAG
AGTGTCAGCACCACTCACGCGCATCCCATCCGGCCCTCACGGCTTCCCAG
TGTGTCAGCGTGACTCGAGCGTATCCCACCCGACCCTCGCTGCCTACAGC
CGTGTCAGCGTGACTCGAGCGTATCCGACCCGGCCCTCGCTACCTACCAG
CGTGTCAGCGTGACTCGAGCGTATCCGACCCGGCCCTCGCTACCTACCAG
CGTGCCAGCGTGACTTGCGCGTATGCCACCCCGCCCTCACTACCCACTGG
CGTGCCAGCGTGACTTGCGCGTATGCCACCCCGCCCTCACTGCTCACTGG
CGTGCCAGCGTGACTTGCGCGTATGCCACCCCGCCCTCACTGCCCACTGG
CGTGCCAGCGTGACTTGCGCGTATGCCACCCCGCCCTCACTGCCCACTGG
CGTGTCAGCGTGACTCGAGC-TATCCCGCCGGGCCGTCACTGCCTGCTGC
CGTGTCAGCGTGACCCGAGC-TATCCCGCCGGGCTGTCACTGCCTGCTGG
CGTGTCAGCGTGACTCGAGC-TATCCCGCCGGGCCGTCACTGCCTGCTGC
CGTGTCAGCGTGACTCGAGC-TATCCCGCCGGGCCGTCACTGCCTGCTGC
CGTGTCAGCGTGACTCGAGC-TATCCCGCCGGGCCGTCACTGCCTGCTGC
CGTGTCAGCGTGACTCGAGC-TATCCCGCCGGGCCGTCACTGCCTGCTGC
CGTGTCAGCGTGACTCGAGC-TATCCCGCCGGGCTGTCACTGCCTGCTGG
TGTATCAAAGCGACTCGAGCGTGTCCCACAAGGCCCTCACTGCATCCTGG
CGTGTCAGCGTGACTCGAGC-TATCCCGCCGGGCCGTCACTGCCTGCTGC
TGCGTGTGCGTGTCTCGAGCGTATCTCGCGTGGTCCTCCACCCAT--TGG
AGTGTCAGCGCAACTTGAACGCATCTCACCCAGCCCTCGCTGCCTGCGGG
AGTGTCAGCGCAACTTGAACGCATCTCACCCAGCCCTCGCTGCCTGCGGG
AGCGTCATCGTGACTCGACCGCATCTCAGTCGGCCCTCGCTGCCCGCTGG
CGTGTCAACGTGACTCGAGCGCAGCACAGCCGGCCCTCGCTGCCCACTGG
CGTGTCAACGTGACTCGAGCGCAGCACAGCCGGCCCTCGCTGCCCACTGG
CGTGTCAACGTGACTCGAGCGCAGCACAGCCGGCCCTCGCTGCCCACTGG
CGTGTCAACGTGACTCGAGCGCAGCACAGCCGGCCCTCGCTGCCCACTGG
TGCGTGTGCGTGTCTCGAGCGTATCTCGCGTGGTCCTCCACCCAT--TGG
TGCGTGTGCGTGTCTCGAGCGTATCTCGCGTGGTCCTCCACCCAT--TGG
TGCGTGTGCGTGTCTCGAGCGTATCTCGCGTGGTCCTCCACCCAT--TGC
TGCGTGTGCGTGTCTCGAGCGTATCTCGCGTGGTCCTCCACCCAT--TGG
--------------------------------------------------
AGTGTCAGCGTGACTCGAGCGTATCCCA----CCCC--------------
CGTGCCAACGT-ATGTGACCCGATTGCACCCGCCCCACGCTGCTTCGCGC
AGCACCGGCGTGACTCTGGCGTGTCCCCCCCGGCCCTCGCTGCCTGCTGG
AGCACCGGCGTGACTCTGGCGTGTCCCCCCCGGCCCTCGCTGCCTGCTGG
AGCACCGGCGTGACTCTGGCGTGTCCCCCCCGGCCCTCGCTGCCTGCTGG
AGCACCGGCGTGACTCTGGCGTGTCCCCCCTGGCCCTCGCTGCCTGCTGG
AGCACCGGCGTGACTCTGGCGTGTCCCCCCCGGCCCTCGCTGCCTGCTGG
AGCACCGGCGTGACTCTGGCGTGTCCCCCCCGGCCCTCGCTGCCTGCTGG
AGTGTCAACGTGACTCGATCGCATCTCAGTCGACC-TCGCTGCCCGCTGG
AGCTGCAACGTAGCGCGAAGGCAGCCCACACGGCCCTCACTGCCTCCTGG
AGCTGCAACGTAGCGCGAAGGCAGCCCACACGGCCCTCACTGCCTCCTGG
GACGTCTGTGCAACCCGAAGGTACCCCGCCCGGCCCTCACTGCCTGCTGG
AGCTTCGCCGTGGCTCTGACGTGTCCC---------TCACTGCGTGCTGG
AGCTTCGCCGTGGCTCTGACGTGTCCC---------TCACTGCGTGCTGG
AGTGTCAGCGTGACTGGAGCGTACCCCACCCAGCCCTCACTGCACGCTGG
CGTGTCGACGTGGCTCGACCGCATCTCAGTCGGCCCTCGCTGCCCGCTGG
CGTGTCGACGTGGCTCGACCGCATCTCAGTCGGCCCTCGCTGCCCGCTGG
CGTGTCGACGTGGCTCGACCGCATCTCAGTCGGCCCTCGCTGCCCGCTGG
CGTGTCGACGTGGCTCGACCGCATCTCAGTCGACCCTCGCTGCCCGCTGG
GGTGTCCGCGTGACTCGAAGGCATCTCACCCGGCCCTCACGGGCTGCTGG
TATGCCGCCATGACCCGAGCGTATCCCACCCGGCCCTCCGCCCCTGGCTC
AGCGCCGGCGCGTATCTAGCGCTGCT----------TCACCACGCGATG-
AGCGCCGGCGCGTATCTAGCGCTGCT----------TCACCACGCGATG-
AGTGTCCGCGTGACTCGAAGGCATCTCACCCGGCCCTCACGGCCTGCTGG
AGTGTCCGCGTGACTCGAAGGCATCTCACCCGGCCCTCACGGCCTGCTGG
AGTGTCCGCGTGACTCGAAGGCATCTCACCCGGCCCTCACGGCCTGCTGG
AGGGTCGGCGTGACCGGAATGTGCCTCACCCGACCCTCACTGTCCGCTGG
AGGGTCGGCGTGACCGGAATGTGCCTCACCCGACCCTCACTGTCCGCTGG
AGCGTCAGCGTGACTCGCTCGCATCTTACCTGACCCTCGCTGCTCGCTGG
TATGCCGCCATGACCCGAGCGTATCCCACCCGGCCCTCACCGCCCCCTGG
AGTGCCGACCTGACTCGGAAGTATCGTCATCGGCCCTCATCGCCTACTGG
--------------------------------------------------
CGTGCCCACGTAACTCGAGCGCAGCCCACCCGGTCCTCGCTGCCTGCCGG
CGTGCCCACGTAACTCGAGCGCAGCCCACCCGGTCCTCGCTGCCTGCCGG
AGTGCCCACGTAACTTGAGCGCAGCCCACCCGGTCCTCGCTGCCTGCCGG
TATGCCGCCATGACCCGAGCGTATCCCACCCGGCCCTCACCGCCCCCTGG
TATGCCGCCATGACCCGAGCGTATCCCACCCGGCCCTCACCGCCCCCTGG
TATGCCGCCATGACCCGAGCGTATCCCACCCGGCCCTCACCGCCCCCTGG
TATGCCGCCATGACCCGAGCGTATCCCACCCGGCCCTCACCGCCCCCTGG
AGTGTGTCCGTGGCTGGAGCGTATCCCACTCGGCCCTCGCTGCTTAGTGG
AGTGTGTCCGTAGCTGGAGCGTATCCCACTCGGCCCTCACTGCTTAGTGG
AGTGTGTCCGTGGCTGGAGCGTATCCCACTCGGCCCTCGCTGCTTAGTGG
AGTGTGTCCGTGGCTGGAGCGTATCCCACTCGGCCCTCGCTGCTTAGTGG
AGTGTGTCCGTGGCTGGAGCGTATCCCACTCGGCCCTCGCTGCTTAGTGG
GGTGTCAGGGTGAATCCAATGCATCCCACTCGGCCCTCGCTGCCTACTGG
----------------------------------------AGC-GACTGG
TGTGTCGACGTGACTCGAGCGTCTCTCATCCGGCTCTGACTTCCCACTGG
----------------------------------------AGC-GACTGG
----------------------------------------AGC-GACTGG
----------------------------------------AGC-GACTGG
AGTGTCAGCGTGACTTGAAGCTACCTCACCCGGCCGTCACTGCCCACTCG
CGTGCCGGCGTGACTCGAGCGCATCACAGCCGACCCTCACTGCCCACTGG
CGTGCCGGCGTGACTCGAGCGCATCACAGCCGACCCTCACTGCTCACTGG
GGCGTCAGCGTGATTCCAACGCGTCTCGCTCGGCCCTCACTGCCTACGGC
AGTGTCCCAGTGACTCGGATGTAGCCTGCCCGTCTCCCACTGCCCACTGC
AGTGTCAGCGTGACTTGAAGCTACCTCACCCGGCCGTCACTGCCCACTCG
AGTGTCAGCGTGACTTGAAGCTACCTCACCCGGCCGTCACTGCCCACTCG
TGTGCCAGCGTGACTCGAAGGTGTCTCCCCCGACCCTCACGGCCCACCGG
TGTGCCAGCGTGACTCGAAGGTGTCTCCCCCGACCCTCACGGCCCACCGG
TGTGCCAGCGTGACTCGAAGGTGTCTCCCCCGACCCTCACGGCCCACCGG
TGTGCCAGCGTGACTCGAAGGTGTCTCCCCCGACCCTCACGGCCCACCGG
TGTGCCAGCGTGACTCGAAGGTGTCTCCCCCGACCCTCACGGCCCACCGG
CGTGCCGGCGTGACTCGAGCGCATCACAGCCGACCCTCACTGCTCACTGG
CGTGCCGGCGTGACTCGAGCGCATCACAGCCGACCCTCACTGCTCACTGG
CGTGCCGGCGTGACTCGAGCGCATCACAGCCGACCCTCACTGCTCACTGG
AGTGTCAGCGTGACTCGAGCGCATCTTATCCGGCCCTCACTGCCTACAGA
GGCGTCAGCGTGATTCCAACGCGTCTCGCTCGGTCCTCACTGCCTACGGC
GGCGTCAGCGTGATTCCAACGCGTCTCGCTCGGTCCTCACTGCCTACGGC
GGCGTCAGCGTGATTCCAACGCGTCTCGCTCGGTCCTCACTGCCTACGGC
GGCGTCAGCGTGATTCCAACGCGTCTCGCTCGGTCCTCACTGCCTACGGC
GGCGTCAGCGTGATTCCAACGCGTCTCGCTCGGTCCTCACTGCCTACGGC
GGCGTCAGCGTGATTCCAACGCGTCTCGCTCGGTCCTCACTGCCTACGGC
GGTGTCAGGGTGAATCCAATGCATCCCACTCGGCCCTCGCTGCCTACTGG
GGTGTCAGGGTGAATCCAATGCATCCCACTCGGCCCTCGCTGCCTACTGG
GGTGTCAGGGTGAATCCAATGCATCCCACTCGGCCCTCGCTGCCTACTGG
GGCGTCAGCGTGATTCCAACGCGTCTCGCTCGGTCCTCACTGCCTACGGC
CGTGCCGGCGTCACTCGGACGTATCCTATCCGGCCCTCACTTCCCACTTG
AGCGTCAGCGCGACTCGCGGGTGCCCCACCCGGTGCTCGCTGCCTGGTGG
--------------------------------------------------
--------------------------------------------------
--------------------------------------------------
AGTGCCAGCGTGGCTCGAACATCTCCCCCCCGGTCCTCTCTGCCCAGCGG
AGTGCCAGCGTGGCTCGAACATCTCCCCCCCGGTCCTCTCTGCCCAGCGG
AGTGCCAGCGTGGCTCGAACATCTCCCCCCCGGTCCTCTCTGCCCAGCGG
AGTGCCAGCGTGGCTCGAACATCTCCCCCCCGGTCCTCTCTGCCCAGCGG
AGTGCCAGCGTGGCTCGAACATCTCCCCCCCGGTCCTCTCTGCCCAGCGG
AGTGCCAGCGTGGCTCGAACATCTCCCCCCCGGTCCTCTCTGCCCAGCGG
AGTGCCAGCGTGGCTCGAACATCTCCCCCCCGGTCCTCTCTGCCCAGCGG
AGTGCCAGCGTGGCTCGAACATCTCCCCCCCGGTCCTCTCTGCCCAGCGG
AGTGCCAGCGTGGCTCGAACATCTCCCCCCCGGTCCTCTCTGCCCAGCGG
CGTGCCGGCGTCACTCGGACGTATCCTATCCGGCCCTCACTTCCCACTTG
CGTGTCCGTGTGACTCGAGCGTATCTCACCCGGCCTTCACTGACAACTGG
CGTGTCCGTGTGACTCGAGCGTATCTCACCTGGCCCTCACTGACAACTGG
AGCGTCAGCGCGACTCGCGGGTGCCCCACCCGGTGCTCGCTGCCTGGTGG
GGCGGCGGCGTGACTCGAGCGTGTCCCACCCGCCCCTCAGTGTCCACTGG
AGTGTCGGCGTGGCTGGGACGCATTGCACCCGGCCC-CGCTGCCTGCTGG
AGTGTCGGCGTGGCTGGGACGCATTGCACCCGGCCC-CGCTGCCTGCTGG
AGTGTCGGCGTGGCTGGGACGCATTGCACCCGGCCC-CGCTGCCTGCTGG
AGTGTCGGCGTGGCTGGGACGCATTGCACCCGGCCC-CGCTGCCTGCTGG
AGTGTCGGCGTGGCTGGGACGCATTGCACCCGGCCC-CGCTGCCTGCTGG
AGTGTCGGCGTGGCTGGGACGCATTGCACCCGGCCC-CGCTGCCTGCTGG
AGTGTCGGCGTGGCTGGGACGCATTGCACCCGGCCC-CGCTGCCTGCTGG
AGTGTCGGCGTGGCTGGGACGCATTGCACCCGGCCC-CGCTGCCTGCTGG
AGTGTCGGCGTGGCTGGGACGCATTGCACCCGGCCC-CGCTGCCTGCTGG
AGTGTCGGCGTGGCTGGGATGCATTGCACCCGGCCC-CGCTGCCTGCTGG
AGTGTCGGCGTGGCTGGGACGCATTGCACCCGGCCC-CGCTGCCTGCTGG
AGTGTCGGCGTGGCTGGGACGCATTGCACCCGGCCC-CGCTGCCTGCTGG
AGTGTCCGCGCGACTCGAAGGTATGCTAACCACCCTTCACTGCGTGCTGG
GGTGCCCGCGTGGCTCGAGTGCATCGTACCTGGCTATCACGGCCTCATGG
AGCGTCATGGCGACTCGAACGCATCCCATCCGGCCCTCGCTGGCCACTGG
AGCGTCATGGCGACTCGAACGCATCCCATCCGGCCCTCGCTGGCCACTGG
AGCGTCATGGCGACTCGAACGCATCCCATCCGGCCCTCGCTGGCCACTGG
AGCGTCATGGCGACTCGAACGCATCCCATCCGGCCCTCGCTGGCCACTGG
TGTGTCCGCGCAAAACACA-GTACCTCACCCAGCCCTCACTGGCCACTGG
GGTGTCAGCGTGGCTCGATCGTATCTCACTCGGCCCTCGCTGCCTACTGG
AGTGTCAGCGTGTCTCGACCTTATTACACCCGGCCCTCACTTCCTACTGG
AGCGCCAGCGGGAGTCGAGCGAGTCCCGCCCAGCCCGCACTGCCCACTGC
--------------------------------------------------
---GGCAGCGTGACTCGAACGCATCCCACCCGACCCTCACGGCCCACTGG
---GGCAGCGTGACTCGAACGCATCCCACCCGACCCTCACGGCCCACTGG
---GGCAGCGTGACTCGAACGCATCCCACCCGACCCTCACGGCCCACTGG
GGTGTCAGAATGGCTGGAACGTCGTCCACCGAGCCCTCACTGCCTCCTGG
GGTGTCAGAATGGCTGGAACGTCGTCCACCGAGCCCTCACTGCCTCCTGG
GGTGTCAGAATGGCTGGAACGTCGTCCACCGAGCCCTCACTGCCTCCTGG
AGCGCCAGCGGGAGTCGAGCGAGTCCCGCCCAGCCCGCACTGCCCACTGC
AGCGCCAGCGGGAGTCGAGCGAGTCCCGCCCAGCCCGCACTGCCCACTGC
AGCGCCAGCGGGAGTCGAGCGAGTCCCGCCCAGCCCGCACTGCCCACTGC
AGCGCCAGCGGGAGTCGAGCGAGTCCCGCCCAGCCCGCACTGCCCACTGC
AGCGCCAGCGGGAGTCGAGCGAGTCCCGCCCAGCCCGCACTGCCCACTGC
GGTGTCAGCGTGACTCGAACGCATCCCCCCCGGCCCGCGCTGCCTACTGG
GGTGTCAGCGTGACTCGAACGCATCCCCCCCGGCCCGCGCTGCCTACTGG
AGTGTCAGCGGGACTCGGGCGTGCACCACCCGGCCCTCACTGCCTGCTGG
AGTGTCAGCGGGACTCGGGCGTGCACCACCCGGCCCTCACTGCCTGCTGG
AGTGTCGGCATGACTCGAACGCAGCCCACCCACCCCTCACTAACTGGCGG
AGTGTCAGTGTGGCTCGAGCGTGTGTCACCCG------------------
AGTGTCAGCGTGGCTCGAGCGTGTGTCACCCG------------------
AGTGTCAGCGTGGCTCGAGCGTGTGTCACCCG------------------
--------------------------------------------------
--------------------------------------------------
--------------------------------------------------
--------------------------------------------------
--------------------------------------------------
AGTGCCAACTTGACTCGAGTGTAGCTGACCGGTCC-TCACTGCT-CACAG
AGTG----------------------------------------------
AGCGTTAGCGCGACTCGAACACATCCCACCCGGCCCTCACTGCCTGCTGG
AGTGCCCGCGTGACTCGAGCGTGTCCCACCCGGCCCTCAGGGCCGACGGC
CGTGCCAACGTGACTCGAGCGTATCTCACCCGACCCTCA-TGCCCACTGC
GGTGTCGCCGCGACTCGAGCGTATCCCCCCCGGCCCTCACTGCCTGCTGG
GGTGTCGCCGCGACTCGAGCGTATCCCCCCCGGCCCTCACTGCCTGCTGG
GGTGTCGCCGCGACTCGAGCGTATCCCCCCCGGCCCTCACTGCCTGCTGG
GGTGTCGCCGCGACTCGAGCGTATCCCCCCCGGCCCTCACTGCCTGCTGG
GGTGTCGCCGCGACTCGAGCGTATCCCCCCCGGCCCTCACTGCCTGCTGG
GGTGTCGCCGCGACTCGAGCGTATCCCCCCCGGCCCTCACTGCCTGCTGG
GGTGTCGCCGCGACTCGAGCGTATCCCCCCCGGCCCTCACTGCCTGCTGG
CGTGTCAGCGTGGCTTGAGTGTGTCTCGCCCGGCCCTCGCTGCCTGCTGG
CGTGTCAGCGTGGCTTGAGTGTGTCTCGCCCGGCCCTCGCTGCCTGCTGG
AGTGTCAGCGTGGCTTGAGCGTGTCTCGCCCGACCCCCGCTGCCTGCTGG
AGTGTCAGCGTGGCTTGAGCGTGTCTCGCCCGACCCCCGCTGCCTGCTGG
AGTGTTCGCGCGACTCGAACACATCCCACCCGGCCCTCACTGCCTGCTGG
AGTGTTCGCGCGACTCGAACACATCCCACCCGGCCCTCACTGCCTGCTGG
AGTGTTCGCGCGACTCGAACACATCCCACCCGGCCCTCACTGCCTGCTGG
AGTGTTCGCGCGACTCGAACACATCCCACCCGGCCCTCACTGCCTGCTGG
AGTGTTCGCGCGACTCGAACACATCCCACCCGGCCCTCACTGCCTGCTGG
CGTGTCAGCGCGACTCGTACGTATCCCACCCGGGCCTCACTGCCCACTGG
CGTGTCAGCGCGACTCGTACGTATCCCACCCGGGCCTCACTGCCCACTGG
CGTGTCAGCGCGACTCGTACGTATCCCACCCGGGCCTCACTGCCCACTGG
CGTGTCAGCGCGACTCGTACGTATCCCACCCGGGCCTCACTGCCCACTGG
CGTGTCAGCGCGACTCGTACGTATCCCACCCGGGCCTCACTGCCCACTGG
GGCGTCGACGTGACTCGAACGTATGTCGCCCGGCGCTCACTGCGTGCTGG
GGCGTCGACGTGACTCGAACGTATGTCGCCCGGCGCTCACTGCGTGCTGG
AGTGCCCGCGTGACTCGAGCGTGTCCCACCCGGCCCTCAGGGCC-GACGG
--------------------------------------------------
--------------------------------------------------
GGTGTCCACGGGACTCGAGCGCATCGCACTCGACCCTCGCTACCTACCGG
CGTGTCAGCGTGGCTTGAGTGTGTCTCGCCCGGCCCTCGCTGCCTGCTGG
AGGGTCAGCGTGACTAGAACGCATCCCACCGGGCCCTCGCTGCCTACCGG
AGAGTCAGCACGACTCGAGCGTATCCCACCCGGCCCTCACTGCCTCCTGG
AGAGTCAGCACGACTCGAGCGTATCCCACCCGGCCCTCACTGCCTCCTGG
AGAGTCAGCACGGCTCGAGCGTATCCCACCCGGCCCTCACTGCCTCCTGG
CGTGTCAGCGCGACTCGTACGTATCCCACCCGGGCCTCACTGCCCACTGG
CGTGTCAGCGCGACTCGTACGTATCCCACCCGGGCCTCACTGCCCACTGG
CGTGTCCGCGTGACTGGACCGTATCTTGCCCGAGCCTCACTGCCTGATGG
CGTGTCAGCGCGACTCGTACGTATCCCACCCGGGCCTCACTGCCCACTGG
CGTGTCAGCGCGACTCGTACGTATCCCACCCGGGCCTCACTGCCCACTGG
AGCGTCGGGGTGACGCGACCGCATGCCACCCGGCCCTCGCTGCCTGCTGG
AGCGTCGGGGTGACGCGACCGCATGCCACCCGGCCCTCGCTGCCTGCTGG
AGCGTCGGGGTGACGCGACCGCATGCCACCCGGCCCTCGCTGCCTGCTGG
--------------------------------------------------
GGTGTCGACGTGACTGGAGCGTATCCGACCCGGCCGTCACCGCGTACTGG
GGTGCGAGCGTGGCTGGAGGATATCCCACCCGACGCTGGCTGCCTCCTGG
GGTGCGAGCGTGGCTGGAGGATATCCCACCCGACGCTGGCTGCCTCCTGG
GGTGCGAGCGTGGCTGGAGGATATCCCACCCGACGCTGGCTGCCTCCTGG
GGTGCGAGCGTGGCTGGAGGATATCCCACCCGACGCTGGCTGCCTCCTGG
GGTGCGAGCGTGGCTGGAGGATATCCCACCCGACGCTGGCTGCCTCCTGG
GGTGCGAGCGTGGCTGGAGGATATCCCACCCGACGCTGGCTGCCTCCTGG
GGTGCGAGCGTGGCTGGAGGATATCCCACCCGACGCTGGCTGCCTCCTGG
GGTGCGAGCGTGGCTGGAGGATATCCCACCCGACGCTGGCTGCCTCCTGG
--------------------------------------------------
--------------------------------------------------
TGTGTCAGCCTGGCTCGAACGCAACCTACCCGACCCTCATTGGCCAGTGG
AGTGTTAGCGTGGCTCGAACCCAACCTACCCGACCCTCATTGGCTACTGG
AGTGTCAGCGTGACTCGAACGTATCTCACCCGGCCCTCAAATGGTACTGG
AGTGTCAGCGTGACTCGAACGTATCTCACCCGGCCCTCAAATGGTACTGG
GGTGTCGACGTGACTGGAGCGTATCCGACCCGGCCGTCACCGCGTACTGG
GGTGTCGACGTGACTGGAGCGTATCCGACCCGGCCGTCACCGCGTACTGG
GGTGTCGACGTGACTGGAGCGTATCCGACCCGGCCGTCACCGCGTACTGG
GGTGTCGACGTGACTGGAGCGTATCCGACCCGGCCGTCACCGCGTACTGG
GGTGCGAGCGTGGCTGGAGGATATCCCACCCGACGCTGGCTGCCTCCTGG
GGTGCGAGCGTGGCTGGAGGATATCCCACCCGACGCTGGCTGCCTCCTGG
AGTGCCAGCGTGGCTTGGGCGTACCTCACCCGGCCCTCACTGCCCACTGG
AGTGCCAGCGTGGCTTGGGCGTACCTCACCCGGCCCTCACTGCCCACTGG
AGTGCCAGCGTGGCTTGGGCGTACCTCACCCGGCCCTCACTGCCCACTGG
TGTGTCAGCCTGGCTCGAACGTATC--ACCTGACCCTTACTGCCCAGTGG
TGTGTCAGCCTGGCTCGAACGTATC--ACCCGACCCTCATTGCCCAGTGG
TGTGTCAGCCTGGCTCGAACGTATC--ACCCGACCCTCATTGCCCAGTGG
TGTGTCAGCCTGGCTCGAACGTATC--ACCCGACCCTCATTGCCCAGTGG
ACTGTCCGCGTGACCCGAACGCATCTCACCCGGCCCTCGCTGCTTGCTGA
AGTGTCAGAGCGACTCAAAAGCCTCCCACCAGGCCGTCACTGCCTCCTGG
GGTGTCAGCGTGGCGCAAGCGTGTCTCGCCCGGCCCTCACTGCTTACTGG
AGTACCAGCCCAAGCCGCATGTACCCCGCCTGGCCCTCACTTTGCACTGG
AGCGTCAGCGTGACTCGAGCGTATCTCACCCGGCCCTCAAATCCTACTGG
AGCGTCAGCGTGACTCGAGCGTATCTCACCCGGCCCTCAAATCCTACTGG
AGCGTCAGCGTGACTCGAGCGTATCTCACCCGGCCCTCACTGCGTGCTGG
AGCGTCAGCGTGACTCGAGCGTATCTCACCCGGCCCTCACTGCGTGCTGG
AGCGTCAGCGTGACTCGAGCGTATCTCACCCGGCCCTCACTGCGTGCTGG
AGCGTCAGCGTGACTCGAGCGTATCTCACCCGGCCCTCACTGCGTGCTGG
GGTGCGAGCGTGGCTGGAGGATATCCCACCCGACCCTGGCTGCCTCCTGG
AGTGTCGGCGTGACTCGAACGTCCCTCACTCGACGCTCACGGCTTACTGG
AGTGTCGGCGTGACTCGAACGTCCCTCACTCGACGCTCACGGCTTACTGG
GGTGTCAGCGTGGCGCAAGCGTGTCTCGCCCGGCCCTCACTGCTTACTGG
GGTGTCAGCGTGGCGCAAGCGTGTCTCGCCCGGCCCTCACTGCTTACTGG
GGTGTCAGCGTGGCGCAAGCGTGTCTCGCCCGGCCCTCACTGCTTACTGG
GGTGTCAGCGTGGCGCAAGCGTGTCTCGCCCGGCCCTCACTGCTTACTGG
GGTGTCAGCGTGGCGCAAGCGTGTCTCGCCCGGCCCTCACTGCTTACTGG
AGTGTCAGCGTGACTCGAGCATATCCCGCCCGGCCCTCACAGCCTACCAG
AGTGTCAGCGTGACTCGAGCATATCCCGCCCGGCCCTCACAGCCTACCAG
AGTGTCAGCGTGACTCGAGCATATCCCGCCCGGCCCTCACAGCCTACCAG
AGTGTCAGCGTGACTCGAACGCGTCTCACGAGGCCCTCACTGCCCATGGT
TGCGTTCGCTTGACTCGAGCATACCCCACCCTGCCCTCGCTGTCTACTGC
TGCGTTCGCTTGACTCGAGCATACCCCACCCGGCCCTCGCTGTCTACTGC
GGTGTCAGTGTGACGCCAGCGTACCTCAGCCGCCCCTCGCTGCCCACTGG
GGTGTCAGTGTGACGTCAGCGTACCTCAGCCGCCCCTCGCCGCCCACTGG
AGCGTCAATGCGGCTCCAACGTATCCCACCCGGCCCTCACTGCCACCTGG
AGTGTCAGGGGAGCTCGAGTGTACCCCACCCCGCCCTCGCTGCGTGCCGG
AGTGTCAGGGGAGCTCGAGTGTACCCCACCCCGCCCTCGCTGCGTGCCGG
AGTCGCAGCGTGGCCAGCACGTATTCCATACGACTGTCACTGCCTGCTGG
CGTGTCCGCGCGACCCGAACGCATGCTACCCGGCGCTCACCGCCAACTGG
AGCGTCATGCGGACTCGAGTGTATTCCGTCCAGCCCTCACTGCCCACTGG
AGCGTCATGCGGACTCGAGTGTATTCCGTCCAGCCCTCACTGCCCACTGG
AGCGTCATGCGGACTCGAGTGTATTCCGTCCAGCCCTCACTGCCCACTGG
AGTGCGGACTTGACGCCTGCGTGTCTCACCCGTCCCTCACTGCCTGCTGG
AGTGCGGACTTGACGCCTGCGTGTCTCACCCGTCCCTCACTGCCTGCTGG
CGTTTTAACGTGACTCGCACGCACTCCACCTCGCCCTCACTGCCTACTAG
TGTGCCAGCTCGACTCGAACGCACCCCACCCGGCATTCACTGCCTACTGG
TGTGTCAACGCGGCTTGAGCGTATCCCACCCGGCCCTCACCGACTACTGC
TGTGTCAACGCGGCTCGAGCGTATCCCACCCGGCCCTCACCGACTACTGG
TGTGTCAACGCGGCTCGAGCGTATCCCACCCGGCCCTCACCGACTACTGG
AGTGTCA-CGTGACTCGAACGCATCCCACCCAGCCCTGACCGCCCACTGG
AGTGTGG-CATGCCATGAACGTATCTCACCTGGCCCTCGCTGCCGACTGG
GGTGTCA-GGGAACTCGAGTGTATCTCACCCGGCCCTCGCTGCTTACTGG
GGTGTCA-GGGAACTCGAGTGTATCTCACCCGGCCCTCGCTGCTTACTGG
AGTGTCA-GGGAGCTCGAGTGTACCCCACCCCGCCCTCGCTGCGTGCCGG
--------------------------------------------------
GGCGTCA-GACGACTCGAGCGTATCTCACACAACCCTCACTACCTCCTGG
--------------------------------------------------
GGTGCCA-TGTAACTCGAGCACATCCCACCCGGCCCTCACCACCTACAGG
GGTGCCA-TGTAACTCGAGCACATCCCACCCGGCCCTCACCACCTACAGG
GGTGCCA-TGTAACTCGAGCACATCCCACCCGGCCCTCACCACCTACAGG
AGTGCCA-CATGATTTGAACGTACTCCATCGGGCCCTCACTGCCCACTGA
AGTGTCC-CGCGACTCGAA-GTATGTTACCCGGCCCTTACTGCCAACTCG
AGCGTCC-CGCGACCCGAGCATATCCCACGAGGCCCTCGCTGTCTACTGC
AGCGTCC-CGCGACCCGAGCATATCCCACGAGGCCCTCGCTGTCTACTGC
AGCGTCC-CGCGACCCGAGCATATCCCACGAGGCCCTCGCTGTCTACTGC
GGCTTGTCCGCGACTCGATCGTCTCCGA--CGGCCCTCTATGCCAACTGC
GGTGTGCCCTCGACTCGAACGCACCCCACCCGGCATTCACTGCCTACTGG
GGTGTGCCCTCGACTCGAACGCACCCCACCCGGCATTCACTGCCTACTGG
AACGCCA-CGCGACTGGGATGTACTCCACCCGGCGCTCACTGCGCACGGG
GGTGTCG-CGTGACTCGTATGTATCCCACCCGGCCCTCACTGCCTCCCAC
GGTGTCG-CGCGACCCAAACGCATCGCGGGCAGCTCCCGCTGCCTCGTGG
GGTGTCG-CGCGACCCAAACGCATCGCGGGCAGCTCCCGCTGCCTCGTGG
AGCGTCA-TGCGGCTCCAACGTATCCCACCCGGCCCTCACTGCCACCTGG
GGTTGTCACGTGGCTGTGAGGC----------------------------
GGTGTCA-CGTGGCTGTGAGGC----------------------------
GGTGTCA-CGTGGCTGTGAGGC----------------------------
GGTGTCA-CGTGGCTCGAGCGCATCCCACACGTCCCTCACCGCCAACTGG
GGCGTCA-CGTGGCTCGAGCGCATCCCACACGTCCCTCACCGCCAACTGG
GGTGTCA-CGTGGCT-----------------------------------
AGTGTCA-GGGAGCTCGAGTGTACCCCACCCCGCCCTCGCTGCGTGCCGG
AGTGTCA-GGGAGCTCGAGTGTACCCCACCCCGCCCTCGCTGCGTGCCGG
--------------------------------------------------
AGTGCCA-CGTGACTCGGGCGCATCCCGCACGGTCCTCACGGTCTACCGG
AGTGCCA-CGTGACTCGGGCGCATCCCGCACGGTCCTCACGGTCTACCGG
AGTGCCA-CGTGACTCGGGCGCATCCCGCACGGTCCTCACGGTCTACCGG
CGTGCCA-CGTGACTCGGACGTATCCCACCCGGCCCTCATAGCTTACTAG
CGTGCCA-CGTGACTCGGACGTATCCCACCCGGCCCTCATAGCTTACTAG
--------------------------------------------------
AGTGTCA-CGCGACCCGGAAGCATCTCACGCGGACCTTGCCGGCTCTTGG
CGTGTCA-GATGTCTTGAACGTAACCCGCCCGGCCCTGACTGGTTAGTGG
CGTGTCA-GATGTCTTGAACGTAACCCGCCCGGCCCTGAGTGGTTAGTGG
CGTGTCA-AGTGACTGGAAGGCGCACCTTGCGCCCCTCGCTGGCCACTGG
CGTGTCA-AGTGACTGGAAGGCGCACCTTGCGCCCCTCGCTGGCCACTGG
CGTGTCA-AGTGACTGGAAGGCGCACCTTGCGCCCCTCGCTGGCCACTGG
AGCGCTA-CGTGACTCGAGCGTACCTCACCCGGCCCTCACTGCCCACTGG
AGCGCTA-CGTGACTCGAGCGTACCTCACCCGGCCCTCACTGCCCACTGG
CGTGCCA-CGTGACTCGGACGTATCCCACCCGGCCCTCATAGCTTACTAG
CGTGCCA-CGTGACTCGGACGTATCCCACCCGGCCCTCATAGCTTACTAG
TGTGCCC-CGTGACTCGAGCGTAACCCCCCCAGCCCTCGGCCCTGACTG-
AGTATGC-CGCAACTCGAACGCATCCCACCCGGCCCTAACTGCCCACTGG
AGTATGC-CGCAACTCGAACGCATCCCACCCGGCCCTAACTGCCCACTGG
AGTATGC-CGCAACTCGAACGCATCCCACCCGGCCCTAACTGCCCACTGG
AGTATGC-CGCAACTCGAACGCATCCCACCCGGCCCTAACTGCCCACTGG
AGTATGC-CGCAACTCGAACGCATCCCACCCGGCCCTAACTGCCCACTGG
AGAGTGCCCGTGGCTCGAACGTATCCCAGCCGGCCCTCGCTGCCCACCGG
AGAGTGCCCGTGGCTCGAACGTATCCCAGCCGGCCCTCGCTGCCCACCGG
AGGGTCC-CCTAACTGGAA-GTATCCCACCCGGCCCTCACTGCCTGCTGG
AGGGTCC-CCTAACTGGAA-GTATCCCACCCGGCCCTCACTGCCTGCTGG
AGCGTCG-CGCGACGCGAGCGCATCTCACCTGGTCCACACCCTTCACTGG
GTGTGTCTCGTCACGCGAACATATCTCACACAGACCGGACTCTCCACTGG
CGTGTCA-GATGTCTTGAACGTAACCCGCCCGGCCCTGACTGGTTAGTGG
CGTGTCA-GATGTCTTGAACGTAACCCGCCCGGCCCTGACTGGTTAGCGG
CGTGTCA-GATGTCTTGAACGTAACCCGCCCGGCCCTGACTGGTTAGTGG
CGTGTCA-GATGTCTTGAACGTAACCCGCCCGGCCCTGACTGGTTAGTGG
CGTGTCA-GATGTCTTGAACGTAACCCGCCCGGCCCTGACTGGTTAGCGG
CGTGTCA-GATGTCTTGAACGTAACCCGCCCGGCCCTGACTGGTTAGTGG
AGTGTCA-CGTGACTGGAACGCACCTCACGCGCCCCTGGCTGCCTGCTGG
AGTGTCA-CGTGACTGGAACGCACCTCACGCGCCCCTGGCTGCCTGCTGG
AGCGTGTCCGTGACTCGAGCGTATCTCACCCGGCCCTCGCTGCCTACTGG
CGTGCCA-CGTGACTCGGACGTATCCCACCCGGCCCTCATAGCTTACTAG
CGTGCCA-CGTGACTCGGACGTATCCCACCCGGCCCTCATAGCTTACTAG
----------------GAGCGTATCCCGCCCGGCCCTCACTGGCCAGTGG
----------------GAGCGTATCCCGCCCGGCCCTCACTGGCCAGTGG
----------------GAGCATATCCCGCCCGGCCCTCACTGCCCAGTGG
----------------GAGCATATCCCGCCCGGCCCTCACTGCCCAGTGG
AGCGTCA-CATAACTCGAGCGTACGTCATCCGACCCTCACTACCTAGTGT
GGCGTCA-CGTGACTCGGGCGTGTCCCACCCGGCCCGCACTGCCTGTTGG
GGCGTCA-CGTGACTCGGGCGTGTCCCACCCGGCCCGCACTGCCTGTTGG
CGTGTCC-CGCGACTGGAA-GCATCTCATCCGGTCCTCACTGCCTGCTGG
GGTGTCA-CGTGACTCGAACGTGTCCCACCCGGCCCTCACTGCCTGCTGG
GGTGTCA-CGTGACTCGAACGTGTCCCACCCGGCCCTCACTGCCTGCTGG
AGCACCA-CATGAATCGGGCGTATCCCACCCGATGCTCAGTTCCCACTCG
AGCGTCG-CGCGACGCGAGCGTACATCACCTGGTCCACACCCTTCACTGG
AGTGTCC-CGCGGCTGGAACGCACCCCACCCGACCCTCACTGCCCGCTGG
ATTATCG-CGCGACTCGAACATATCTCTCTCGGGCCTGACTGCCGACTGG
AGTGCCA-CGCGGCTCGAATGCGTCCCATCCGGCCCCCGCCGCCCACTGG
AGTGCCA-CGCGGCTCGAATGCGTCCCATCCGGCCCCCGCCGCCCACTGG
GCTGTCA-CCTGACTCGA-CTTCATCAACTCGCCCCTGACTGCCTACAG-
GCTGTCA-CCTGACTCGA-CTTCATCAACTCGCCCCTGACTGCCTACAG-
GCTGTCA-CCTGACTCGA-CTTCATCAACTCGCCCCTGACTGCCTACAG-
AGTGTCA-CGTAACTTGAACGTATCTCACCTGATCTTCATTGCCTGCTGA
ACAGCCA-CGTGACTCCAATGTACTCCACCTGGCCGTCACTGCCTCTAGG
AGTGCCC-CGTGTCTCGAACGTATCCCCTCCCGCCATCAC-GACTTCTGT
GGTGCCG-CATGGCTCGAGCGCATCCCACGCGCCCATCACTGCCTACTGG
-GTGTCC-CGCGGCCGGAACGCACCCCACCCGACCCTCACTGCCCGCTGG
-GTGTCC-CGCGGCCGGAACGCACCCCACCCGACCCTCACTGCCCGCTGG
-GTGTCC-CGCGGCCGGAACGCACCCCACCGGACCCTCACTGCCCGCTGG
-GTGTCC-CGCGGCCGGAACGCACCCCACCCGACCCTCACTGCCCGCTGG
-GTGTCC-CGCGGCCGGAACGCACCCCACCCGACCCTCACTGCCCGCTGG
-GTGTCC-CGCGGCCGGAACGCACCCCACCCGACCCTCACTGCCCGCTGG
-GTGTCC-CGTGACTCGAACGCATCCCACCCGGCCCTCACGGCCCACTGG
AGTGTCA-CGCGACTCAAGTGTACCCCACCCAGCTCTCACTGCCCACTGG
--------------------------------------------------
AGTGTCA-CGCGACTCGA-CGGA-CCCGCCCGGCCCTCACTGCCTCCTGC
AGTGTCA-CGCGACTCGA-CGGA-CCCGCCCGGCCCTCACTGCCTCCTGC
AGTGTTA-TGCGACTGGA-CTCATCGCACCCGGCCCTCGCGGCCTACAGA
AGTGTCA------CTCGAACGTGTC-----------TCGCGGCCTGCTGG
GGTGCCG-CATGGCTCGAGCGCATCCCACGCGCCCATCACTGCCTACTGG
GGTGCCG-CATGGCTCGAGCGCATCCCACGCGCCCATCACTGCCTACTGG
GGTGCCG-CATGGCTCGAGCGCATCCCACGCGCCCATCACTGCCTACTGG
GGTGCCG-CATGGCTCGAGCGCATCCCACGCGCCCATCACTGCCTACTGG
GGTGTCC-CGTGACTCGAACGCATCCCACCCGGCCCTCACGGCCCACTGG
GGTGTCC-CGTGACTCGAACGCATCCCACCCGGCCCTCACGGCCCACTGG
GGTGTCC-CGTGACTCGAACGCATCCCACCCGGCCCTCACGGCCCACTGG
GGTGTCC-CGTGACTCGAACGCATCCCACCCGGCCCTCACGGCCCACTGG
GGTGTCC-CGTGACTCGAACGCATCCCACCCGGCCCTCACGGCCCACTGG
AGTGTCA-CGCGACCCAAACGCACCTAAGCATTCTCTCACTTCCTACTGG
CGTATCA-CATGGCTGGAGCCTATCTCACCCGGCCCTCACTGCCCACTGG
CGTATCA-CATGGCTGGAGCCTATCTCACCCGGCCCTCACTGCCCACTGG
AGTGTCA-CGCGACTCGA-CGGA-CCCGCCCGGCCCTCACTGCCTCCTGC
AGTGTCA-CGCGACTCGA-CGGA-CCCGCCCGGCCCTCACTGCCTCCTGC
AGTGTCA-CGCGACTCGA-CGGA-CCCGCCCGGCCCTCACTGCCTCCTGC
AGTATCA-CGCGACTCGA-CGGA-CCCGCCCGGCCCTCACTGCCTCCTGC
AGTGTCA-CGCGACTCGA-CGGA-CCCGCCCGGCCCTCACTGCCTCCTGC
AGTGTCA-CGCGACTCGA-CGGA-CCCGCCCGGCCCTCACTGCCTCCTGC
CGTGCCA-CGTGACTCGAGCTCATGCCACCCGGCCCTCGCTGCCTACAGA
CGTGCCA-CGTGACTCGAGCTCATGCCACCCGGCCCTCGCTGCCTACAGA
CGTGCCA-CGTGACTCGAGCTCATGCCACCCGGCCCTCGCTGCCTACAGA
AGTGTCC-CGTAATTCGAACGTAACCCGCCCGGCCCTCACTGCCCACTGG
GGTATCT-TGTTGCTTGAACAGATCTCA-CCGGTCCTTACAGCCCACTGG
GGTATCT-TGTTGCTTGAACAGATCTCA-CCGGTCCTTACAGCCCACTGG
GGTGTCC-CGTGACTCGAATGCATCCCACCCGGCCCTCGCGGCCCACTGG
GGTGTCC-CGTGACTCGAATGCATCCCACCCGGCCCTCGCGGCCCACTGG
AGTATCA-CGCGACTCGACTGCGACCCGCCCGGCCCTCACTGCCTCCTGC
AGTGGCA-CGTGACTCGAGCATACCCCACCCGGCCCTCACCGCCGACTGA
--------------------------------------------------
--------------------------------------------------
GGTGTCC-CGCGACTGGAGAGCATCCCATCCGGCC-TCACTGCCTACTGG
GGTGTCG-CATGGCTCGTACGTGTCCCTCCTGACCCTCATGGGTGACTGG
--------------------------------------------------
GGCGTCA-CGTACCTCTAGCGAAACCCAACCTGCCCTCAGCCTGCAAGGG
AGTGTCA-CGTGTCTCGAACGTACCCCACCCGGCCCTCACGGCCCACTGG
--------------------------------------------------
--------------------------------------------------
--------------------------------------------------
--------------------------------------------------
CGTGTCA-CGTGGCTCCAACGCATCCCCCCTGGCCCTCACCGACTACTTG
CGTGTCA-CGTGGCTCCAACGCATCCCCCCTGGCCCTCACCGACTACTTG
AGTGCCA-CGTGACTGGAAGGCGTCGCAGCTGGCCGTCACTGCCCGCTGG
AGTGCCA-CGTGACTGGAAGGCGTCGCAGCTGGCCGTCACTGCCCGCTGG
AGTGCCA-CGTGACTGGAAGGCGTCGCATCCGGCCGTTACTGCCCGCTGG
AGTGCCA-CGTGACTGGAAGGCGTCGCATCCGGCCGTCACTGCCCGCTGG
AGTGCCA-CGTGACTGGAAGGCGTCGCATCCGGCCGTCACTGCCCGCTGG
AGTGCCA-CGTGACTGGAAGGCGTCGCATCCGGCCGTCACTGCCCGCTGG
AGTGCCA-TGCAACTCGAGTGTAACTCACCCGGCTCTCACTGCCTACCGG
AGTGTCC-CTTGACTCGAATGTATCCCCCCCGGCCCCAACTGCCGAGTGG
AGTGTCC-CTTGACTCGAATGTATCCCCCCCGGCCCCAACTGCCGAGTGG
GGTGTCG-CGCGACTTGAGCGTTTTTTA-CCGACCCTCGCTGCACATAGG
GGTGTCC-CGCGACTGGAGAGCATCCCATCCCGCCCTCACTGCCTACTGG
GGTGTCC-CGCGACTGGAGAGCATCCCATCCCGCCCTCACTGCCTACTGG
AGTGCCC-CGCAGCGCGAA-GTGTCTCACCCGGGCCTCACTGCCCACTGG
AGTGCCC-CGCAGTGCGAA-GTGTCTCACCCGGGCCTCACTGCCCACTGG
AGTGCCC-CGCAGCGCGAA-GTGTCTCACCCGGGCCTCACTGCCCACTGG
AGTGCCG-CGTGACTCGAGCGTGTCTCA-CCGGCCCTGCCCACCTAC---
AGTGCCG-CGTGACTCGAGCGTGTCTCA-CCGGCCCTGCCCACCTAC---
AGTGCCG-CGTGACTCGAGCGTGTCTCA-CCGGCCCTGCCCACCTAC---
GGTGTCA-CGTGACTCAAACGTGGCCCGCCCGTCCCTCGCTGCCTGC-GG
GGTGTCA-CGTGACTCAAACGTGGCCCGCCCGTCCCTCGCTGCCTGC-GG
CGTGTGTCCGTGACTCGAACGTAGCGCACCCGGCCCTCCACTGCTACTGG
AGTGTCC-CGTGACTCGATCGTATCTCATCCGGCATTCACTGCTTGCTGG
GCTGTCC-CGCGACTCGAGTGTGTCTCACCCGGGCCACACTGCCTACGGC
--------------------------------------------------
--------------------------------------------------
AGAGCGCCCGTGACTCGAGCGTACCTCACCCGGCCCTAGCTGCCTACCGT
AGTGCCA-CGTGACTGGAAGGCGTCGCAGCTGGCCGTCACTGCCCGCTGG
AGTGCCA-CGTGACTGGAAGGCGTCGCAGCTGGCCGTCACTGCCCGCTGG
AGTGGCA-CGTGACTCGAGCATACCCCACCCGGCCCTCACCGCCGACTGA
CGTGTCC-TGCGACTCGAACGTATCCCACCCGGCCCTCACTGCCTGCTGG
CGTGTCC-TGCGACTCGAACGTATCCCACCCGGCCCTCACTGCCTGCTGG
CGTGTCC-TGCGACTCGAACGTATCCCACCCGGCCCTCACTGCCTGCTGG
AGTGTCC-CTTGACTCGAATGTATCCCCCCCGGCCCCAACTGCCGAGTGG
GGTGTCC-CGCGACTGGAGAGCATCCCATCCCGCCCTCACTGCCTACTGG
AGTGCCC-CGCAGTGCGAAGATGTCTCACCCGGGCCTCACTGCCCACTGG
GCAGTTCCCGTGGCTCAAAAGTACCTCACTGAGCTCTCGCTGCCCACTAG
--------------------------------------------------
--------------------------------------------------
--------------------------------------------------
--------------------------------------------------
--------------------------------------------------
AGCGTCA-CGTGACTCGAGCGCATCTCTCCTTTCCCTCGCTGCCCACTGG
CGGATCG-CGTGACTCCAGCGTATCCCCCACGACCCTCACCGCCTACTGG
CGGATCG-CGTGACTCCAGCGTATCCCCCACGACCCTCACCGCCTACTGG
GGTGGCA-CGTGACTCGAACGCATCCCAGGTGGCCCCTGCTGCCTGCTGG
GGTGGCA-CGTGACTCGAACGCATCCCAGGTGGCCCCTGCTGCCTGCTGG
AGTGCCA-CGCGACTCGAGCGCATCTCACCGGGCCCACACTGCCTACGGC
GGTGCCA-CGTGACTCTGGCGTCTCCCACCCGGCCCTCACCGCCAACTGG
AGTTTGA-CGTGACTCGAGCGTATCCCACCCGGCCGTCACTGCCTGATGG
--------------------------------------------------
-------------CCCAAGCGTATCGCAGCTGGCCGTCGCTGCCCACTGG
-------------CCCAAGCGTATCGCAGCTGGCCGTCGCTGCCCACTGG
-------------CCCAAGCGTATCGCAGCTGGCCGTCGCTGCCCACTGG
ATTGTCG-CGTGACTCGAACACATCCCACCCGGCCCTCATTTCCTACTGC
CTCGTCA-CGTGACTCGAACGTGTCTTACCCGGCCCTCATTGCCTACTGT
CGTGTCA-CGTGACTCAAGCGAATCTTACCCTCCTCCCCCTGCCTACTGT
AGTGTCG-TGTGTCTCGA-CGCATCTCACCCAGCCCTCACTGCCTGCTTG
--CGCCT-CGCGGCTCCAGCGCATCTCACCCGGCCCACACCGCCTGCTGG
--------------------------------------------------
AGTGTCA-CCTGACTCGAACGCATCTCACCCGGCCCTCACTGCCTGCCGG
AGTCGCA-CGTGCTTCGAATGCATCCCACCCGGCCCTCACAGCCTCCTGA
AGCGTCA-CCTGACTCGAGCGTATCCCACCCGGCCCTCACTGCCTGCTGG
CGTGTCC-CGCGACGCGAACGTGCCCCGCCCGGCCCTCACTGCCCACTGG
CGTGTCC-CGCGACGCGAACGTGCCTCGCCCGGCCCTCACTGCCCACCGG
CGTGTCC-CGCGACGCGAACGTGCCTCGCCCGGCCCTCACTGCCCACCGG
CGTGTCC-CGCGACGCGAACGTGCCTCGCCCGGCCCTCACTGCCCACCGG
CGTGTCC-CGCGACGCGAACGTGCCTCGCCCGGCCCTCACTGCCCACCGG
AGTGTCA-CGTGACTCGAACGTGTCTTACCCGGCCCTCATTGCCTACTGT
AGTGTCA-CGTGACTCGAGCGTATTTCACCCGACCCTCAGTGTCTAGTTG
CGTGTCA-CGTGGCTGGAGCGTCGCTCGCCCGGCCCTCATTGCCTGCTCA
--CGCCT-CGCGGCTCCAGCGCATCTCACCCGGCTCTCCACCGCTGCTGG
ATCGTCA-CGTAACTCGAACGTATCCTGCCCGGCCCCCGCTGCCCACTGG
ATCGTCA-CGTAACTCGAACGTATCCTGCCCGGCCCCCGCTGCCCACTGG
AGTGTCA-GGTGACTGGAACCTGCGCCACCCGGCCCCCGCTGCCCGCTGG
AGTGTCA-GGTGACTGGAACCTGCGCCACCCGGCCCCCGCTGCCCGCTGG
AGTGTCA-GGTGACTGGAACCTGCGCCACCCGGCCCCCGCTGCCCGCTGG
AGTTTGA-CGTGACTCGAGCGTATCCCACCCGGCCGTCACTGCCTGATGG
AGTTTGA-CGTGACTCGAGCGTATCCCACCCGGCCGTCACTGCCTGATGG
GGTGTCG-CGCGACTCGGACGCATCTCACCCGGCCCACACAGCCTACTGG
GGTGTCG-CGCGACTCGGACGCATCTCACCCGGCCCCCACAGCCTACTGG
GGTGTCG-CGCGACTCGAACGCATCTCACCCGGCCCACACAGCCTACTGG
CGTGTCC-CGCGACGCGAACGTGCCCCGCCCGGCCCTCACTGCCCACTGG
CGTGTCG-CGTGGCTCGAGCGTATCCCAACTGGGCT--------------
CGTGTCG-CGTGGCTCGAGCGTATCCCAACTGGGCT--------------
CGTGTCA-CGTGACTCAAACCTATCTCG-CCTGTACTGAATGCTTACCGG
AGTTCCA-CGGAACTCGAACACATCCTACCCGGCCCTCACTGCCTGCTAG
AGTGTCC-CGTGACTCAAACACATCTCACCCGGCCCTCGCTGCCTGCTGG
CGTGTCA-CGTGACTCAAGCGAATCTTACCCTCCTCCCCCTGCCTGCTGT
AGTATCA-CGTGGCTGGAACGTATCCCACCTGGCCCTCACTGCCTACTGG
AGTATCA-CGTGGCTGGAACGTATCCCACCTGGCCCTCACTGCCTACTGG
AGTATCA-CGTGGCTGGAACGTATCCCACCTGGCCCTCACTGCCTACTGG
AGTGTCA-CGCGATTCGGACATATCCCACCCGGCCCTCACCGCTTGCTGG
AGTGTCA-CGCGATTCGGACATATCCCACCCGGCCCTCACCGCTTGCTGG
AGTGTCA-CGCGATTCGGACATATCCCACCCGGCCCTCACCGCTTGCTGG
--------------------------------------------------
--------------------------------------------------
--------------------------------------------------
--------------------------------------------------
AGTCTTA-CGGAACCGGAGCTTATCTCACCCGGCCTTCACTGCCCACTGG
AGTGTCC-CGTGGATCGAACGCATCTCACCCGGCCCTCGCTTCCTGTGTG
CGTGTCA-CGTGGCTGGAGCGCCTCGCGCCCGGCCCTCATTGCCTGCTCA
----------CGGCTCCAGCGCATCTCACCCGGCCCCAACCGCCTGCTGG
----------CGGCTCCAGCGCATCTCACCCGGCCCCAACCGCCTGCTGG
----------CGGCTCCAGCGCATCTCACCCGGCCCCAACCGCCTGCTGG
----------CGGCTCCAGCGCATCTCACCCGGCCCCAACCGCCTGCTGG
----------CGGCTCCAGCGCATCTCACCCGGCCCCAACCGCCTGCTGG
CGTGTCA-AGCGACCCGGGCGCATCTCACCCGGCCCGCACTGCCTGCCGG
CGTGTCA-AGCGACCCGGGCGCATCTCACCCGGCCCGCACTGCCTGCCGG
CGTGTCA-AGCGACCCGGACGCATCTCACCCGGCCCGCACTGCCTGCCGG
CGTGTCA-AGCGACCCGGGCGCATCTCACCCGGCCCGCACTGCCTGCCGG
AACATGA-GGCAGTTCGTATG--TCCCACCCGGCCCTCACTGCCTACTGG
AGCGTCA-TGCAGCTCGACCGCACCTCACCCGGCTCTCTCTGCATGGTGG
AGCGTCA-TGCAGCTCGACCGCACCTCACCCGGCTCTCTCTGCATGGTGG
AGCGTCA-TGCAGCTCGACCGCACCTCACCCGGCTCTCTCTGCATGGTGG
AGCGTCA-TGCAGCTCGACCGCACCTCACCCGGCTCTCTCTGCATGGTGG
AGCGTCA-TGCAGCTCGACCGCACCTCACCCGGCTCTCTCTGCATGGTGG
--------------------------------------------------
AGTGTCA-AGTGGCTTGAACCTCTCTCACCCGGTCATCAGTGCGTAGGGA
AGTGTCC-AGGGGGTCGAACGTATTCCACCCGGCCCTCACTGCCTGCTAG
CGTGCCA-CGTGACTCAAGCGTACCCCACCCGACCCTCGCTGTCCACTGC
--------------------------------------------------
AGCGCCA-CGCCACTCGAGCGTGCCCCACCTGGCCCTTACCACCTCCTCC
CGTGCCC-CGTGGCTCGCACGTACCTCCTTCGGCCGCCACTGCCCACTGG
CGTGCCC-CGTGGCTCGCACGTACCTCCTTCGGCCGCCACTGCCCACTGG
CGTGCCC-CGTGGCTCGCACGTACCTCCTTCGGCCGCCACTGCCCACTGG
AGTGTCG-CAGGATTCGAGCATATCTCATCCGGCCCTCACCCGCCACAGG
AGCGCCA-CGCCACTCGAGCGTGTGCCACCTGGCCCTTACCACCTCCTCG
ATTGCCA-CGTGGCTTGGACGTCTCTCACCCGGTTCTCACTGCCTACTGG
ATTGCCA-CGTGGCTTGGACGTCTCTCACCCGGTTCTCACTGCCTACTGG
ATTGCCA-CGTGGCTTGGACGTCTCTCACCCGGTTCTCACTGCCTACTGG
--------------------------------------------------
--------------------------------------------------
AGATTCA-GGCGACTCGGATGTACCTCGCCCGGCCCTGCGGGTCTACTGG
AGTGT---------------------------------------------
AGTGT---------------------------------------------
AGTGT---------------------------------------------
AGTGT---------------------------------------------
AGTGT---------------------------------------------
AGTGT---------------------------------------------
AGTGTCA-AGTGGCTTGAACCTC-------------TCACCCGGCATCAG
AGTGTCA-TGTGACTCAAACGTACTTCACTCTGCCCTCTCTCCGTACTGG
CGTGTCC-CGTGACTCGAGTGTCTCCCACCCGGCCTTCACTGCTAGTTGG
A-TGCCA-CGTGACTCGAGCGTATTCCACCCGACCCTTAGCGCCTGCTGG
A-TGCCA-CGTGACTCGAGCGTATTCCACCCGACCCTTAGCGCCTGCTGG
AGTGTTG-CGTGGCTCAAACGTACCTCACCCAGCC---------------
AGTGTTG-CGTGGCTCAAACGTACCTCACCCAGCC---------------
GGTGTCG-CGTGACTGGAACGTGCCCCACCTGGCCTTCACTGCCTACTGG
GGTGTCG-CGTGACTGGAACGTGCCCCACCTGGCCCTCACTGCCTACTGG
GGTGTCG-CGTGACTGGAACGTGCCCCACCTGGCCCTCACTGCCTACTGG
AGTGTCC-CGTGACTTGAGCGTATTCCACCCGGCCTTCGCTGCCGGCTGG
AGTGCCA-TGTTACTCGGAGACATCCTACCCAGCAATCACTACCTACTGG
AGCGTCA-CGTGACTCGAGTGTATCCCACGCGGCCCTCACTGCCTACTAA
ACTGTCA-CCGATTCGGAACGTATCTCACCCGGTTTTCATTACCTAGTGG
AGTGTCA-TGTCACTCGAACGTATCTCATCCGGCCCTTACCGCCCACTGG
AGTGTCA-CGCGACTCGAACGCTTCCTACCAGGCCCTCACTGTCCAGTGA
CGTGTCG-CGTGACTCGAACGGATCTCACCCGACTCTCACTGCCTACTGG
CGTGTCC-CGTGGCTCGCACGTACCTCCTTCGGCCGCCGCTGCCCACTGG
CGTGTCC-CGTGGCTCGCACGTACCTCCTTCGGCCGCCGCTGCCCACTGG
AGAGTCA-CGTGTCTCACCCCCCTGTCC--------TCACTGCCAACTGG
GGCGTTA-TGTGACTGGAACGTATCCCA-CTGTCCCTCACTGCCTGCTCA
AGTGTCG-CGTGATCCGAACGTATCCCACTCGGCGA--------------
AGTGTCG-CGTGATCCGAACGTATCCCACTCGGCGA--------------
AACGTCA-CGTGATTCGAGTATATGCCACCTGGCCCTCACTGCCGGCTGG
GGTGGCA-CGTGATTCCGACGCATCCCACCCGGCCCTCACTGCCTACTGG
GGTGGCA-CGTGATTCCGACGCATCCCACCCGGCCCTCACTGCCTACTGG
GGTGGCA-CGTGATTCCGACGCATCCCACCCGGCCCTCACTGCCTACTGG
GGTGTCA-CGTGGCTCGAACGCATCCTACCCGGCCCTCACTGCCCATTGG
GGTGTCA-CGTGGCTCGAACGCATCCTACCCGGCCCTCACTGCCCATTGG
AGTGCCA-CCTGACTTGGACGCATCCCACCTGGCCCTCGCTGCCCACTAG
AGTGCCA-CCTGACTTGGACGCATCCCACCTGGCCCTCGCTGCCCACTGG
AGTGCCA-CCTGACTTGGACGCATCCCACCTGGCCCTCGCTGCCCACTGG
AGTGCCG-CCTGACTGGAACCTATCCCACACGGCCCTCGCTGCCTACCGA
AGTGCCG-CCTGACTGGAACCTATCCCACACGGCCCTCGCTGCCTACCGA
AGTGTCG-CATGACTCGAACGCAGCCCACCCACCCCTCACT---AACTGG
AGTGTCG-CCTGACTCGAGCGTATCTCGCCCGGCCCTCACTGCCTACTGG

TGGGGAGGCCGAGTCGTCCCGAGGAAGATAGCAGGTGGCCACC-------
TG------------------------------------------------
CGGTGACCCTGAGCCAACGTGAGGGATGCACCAGGTGGCGACCGGTATAG
TGGGGAGCCTGAGGCACCC-------------------------------
TGATGGGCCTCAGCCGCCTTAAGGGACGCGCTGGCTGGGGGCCGGCGTGC
TGAGGAGCCTGCACCACCCAGAGGGACGCGCCACGTGGCGACCAGCATGA
TCGGGAGCCGGAGCCACCTCGAGGCATGCATCGGGTGGCGACCGGCATGA
TGGGAAGCCTGAGTGTCCCCGAGGGCGGCACCCGGCGGCGACTGGCGAAG
TGGGAAGCCTGAGCCGCCCCGAGGAATGCACCATGTGGCGAGCGG-----
GG-TGTGCTTGAGGCGCCTTGAGCGATGCAGGAGGTGGCAACCGGCATGA
TGGGGAGCCTGGGCCCCCGGGAGGGATGCACCAGGTGGCGACCGGCACGA
TGGGGCGGCTCAGGCGCCCCGAGGGATGCACCACGTGGCGAGCAGCATGG
TGGGGCGCCTGGGCGACCGCGAGGGATGCACCAGGTGGCGACCAGCATGA
TGGGGAGCCTGAGCCACCTCGAGCGATGCATCAGGTGGTGACCTGCATGA
TGGGGCGCCTGGGCCACCCCGAGGAATGCACCACGTGGCGACCGGCACAA
TGGGGAGCCTGTGCCGCGCCGAGGGATGCAGCACGTGGCGCCAGGCATGG
--------------------GAGTGGTGCCGGTGCTGC-GGCCGGGATAA
GGGGGGGCGTGAGTCACCGCGACGGATGCACCAGGTGGCGACCGGCATGA
GGGGGGGCGTGAGTCACCACGACGGATGCACCAGGTGGCGACCGGCATGA
GGGGGGGCGTGAGTCACCGCGACGGATGCACCAGGTGGCGACCGGCATGA
GGGGGGGCGTGAGTCACCGCGACGGATGCACCAGGTGGCGACCGGCATGA
GAGGGGGCGTGAGTCACCGCGACGGATGCACCAGGTGGCGACCGGCATGA
GAGGGGG-------------------------------------------
GAGGGGG-------------------------------------------
--------------------------------------------------
TGGGGCGCCTGGGCGACCGCGAGGGATGCACCAGGTGGCGACCGGCATGA
TG------------------------------------------GGGTGA
TG------------------------------------------GGGTGA
TGGGGAGCGTGCACCGCCGCGCGGGATGCACCAA----------------
TGGGGAGCGTGCACCGCCGCGCGGGATGCACCAA----------------
GGGGGAGCCAGAGCCACCC-------------------------------
------------------------------------GGGGAGCGGCTTGA
------------------------------------GGGGAGCGGCTTGA
TGGGGG-CCTGTTCCACTCCGAGGGATGCCCTAGCGGGGAAGTGGTTAAA
TGGGGAGGCTGCG-------------------------------------
TGGGGAGGCTGCG-------------------------------------
TG------------------------------------------------
TG------------------------------------------------
TG------------------------------------------------
TG------------------------------------------------
TG------------------------------------------------
TG------------------------------------------------
TG------------------------------------------------
TG------------------------------------------------
TG------------------------------------------------
TGGGGAACC-----------------------------------------
TGGGGAACC-----------------------------------------
TGGGGAACC-----------------------------------------
TAGGGGGCCTAACCCACCCTGAGGGATGCACCACATGGTGGCCGGCATGA
TAGGGGGCCTAACCCACCCTGAGGGATGCACCACATGGTGGCCGGCATGA
CG-GGAGCCTGGGTCACCCCGAGCGATGCAGCGCATGGCGACCGACATCA
CG-GGAGCCTGGGCCACCCCGAGCGATGCAGCGCATGGCGACCGACATCA
CG-GGAGCCTGGGTCACCCCGAGCGATGCAGCGCATGGCGACCGACATCA
TGGGGAACCCGAGCGACCTGGAGA--------------------------
TTGGTAG--TGAGGCACCGCGAGGGATGCACCTGATGGCGACCGGCATAA
TGGAGAGCCTGAGCCACCGCGAACGACACACCAGGGGACGA--GGCG---
TGGGGAACCCGAGCGACCTGGAGA--------------------------
TGGGGAGCCTGGGCCGCCGCGAGGGACGCGCCAGGTGGCGGCCGGCGTGA
TGGGGAGCCTGGGCCGCCGCGAGGGACGCGCCAGGTGGCGGCCGGCGTGA
TGGGCAGCCTGAGCCACGCCGAGGGGTGCATCAGGTGGCGACCGGCGCAA
TG------------------------------------------------
TGGGGAGCCTGAGCCGCCCCGAGCGATGCACCAGGTGGCGG---------
TGGGGAGCCTGAGCCGCCCCGAGCGATGCACCAGGTGGCGG---------
TGGGGAGCCTGAGCCGCCCCGAGCGATGCACCAGGTGGCGG---------
TGGGGAGCCTGAGCCGCCCCGAGCGATGCACCAGGTGGCGG---------
TGGGGAGCCTGAGCCGTCCCGAGCGATGCACCAGGTGGCGG---------
TGGGCAGCCTGAGCCACGCCGAGGGGTGCACCAGGTGGCGACCGGCGCAA
TGGGCAGCCTGAGCCACGCCGAGGGGTGCACCAGGTGGCGACCGGCGCAA
TGGGCAGCCTGAGCCACGCCGAGGGGTGCACCAGGTGGCGACCGGCGCAA
TGGGGAGCCTGAGCCGCCCCGAGCGATGCACCAGGTGGCGG---------
GGAGAATCCTTAGCCGTCCTGATAGATGCGCCAAGTGTGG----------
TTGGGAGCCTGAGCTGCTCCCGGGGATGCACCACATGGCGGGCC------
TGGGGGGTCTGAGCCACCGTGAGGGATGCACCACGAAGCGACC-------
TGGGGCGCCTGAGCCCCCTCGAGGTATGCACCAGGTGGCGACGTGCCTGA
TTGGGAGCCCGTACCA-----AGGTGTGCGCCCGTTGGCAAG---CAAAA
TGGGAAGCCGGAGCTACCCCGACGGATGCACCAGGTGGCGATTGGCATGA
TGGGGAGCCTGCGCCACACCGAGGGATGCGCCAGCAGGCGACC-------
TGGGGAGCCTGCGCCACACCGAGGGATGCGCCAGCAGGCGACC-------
TGGGGAGCCTGCGCCCCACCGAGGGATGCGCCAGCAGGCGACC-------
TGGGGAGCCTGCGCCACACCGAGGGATGCGCCAGCAGGCGACC-------
TGGGGAGCCTGCGCCCCACCGAGGGATGCGCCAGCAGGCGACC-------
TGGGGAGCCTGCGCCACACCGAGGGATGCGCCAGCAGGCGACC-------
TGGGGCGCCTAAGCCGCCCTG----AGGCGCGAG----------------
TGGGGATCCCGCGCCGCCCCGAGGGACGCACC-GGTGGCGCGCGGCGTGA
TGGGGCGCCTAAGCCGC---------------------------------
TGGGGCGCCTGAGACGCCCTGAGGGATGCACCAGGTGGCGACGTGCCTGA
TGGGGATCCCGCGCCGCCCCGAGGGACGCACC-GGTGGCGCGCGGCGTGA
TGGGGCGCCTGAGACGCCCCGAGAGATGCACCAGGTGGCGACGTGCCTGA
TGGGGCGCCTGAGACGCCCCGAGAGATGCACCAGGTGGCGACGTGCCTGA
GGTGGAGCCTGCGCTGCTCTGAGAGACGCGCTACGTTTCGAGCGGCATAA
TGGGGCGCCTGAGCCACCCC------------------------------
TGGGGAGCCAGGGTCACGCCGAGGAATGCACGAGATGGCGACTGGCATGA
TGGGGAGCCAGGGTCACGCCGAGGAATGCACGAGATGGCGACTGGCATGA
--------------------GAGAGATGCACGAGGTGGCGACCGGCATGA
TGGGGGGGCCGAGCCCCCCTGAGGGATGCACCGG----------------
TGGGGGGGCCGAGCCCCCCTGAGGGATGCACCGG----------------
TGTGGGGGCCGAGCCCCCCTGAGGGATGCACCGG----------------
TGGGGGGGCCGAGCCCCCCTGAGGGATGCACCGG----------------
TGGGGAGCCCGCGCCACCCCGAGGGATGCAGCAGGGGGCGGCCGGCATGA
TGGGGAGCCCGCGCCACCCCGAGGGATGCAGCAGGGGGCGGCCGGCATGA
TGGGGAGCCCGCGCCACCCCGAGGGATGCAGCAGGGGGCGGCCGGCATGA
TGGGGAGCCCGCGCCACCCCGAGGGATGCAGCAGGGGGCGGCCGGCATGA
TGGGGGGGCCGAGCCCCCCTGAGGGATGCACCGG----------------
TGGGGGGGCCGAGCCCCCCTGAGGGATGCACCGG----------------
ACGGGAGCCTGAGCCACCCCGAGGGATGCCCGAGATGGCGGCCGGCGTGA
TGGGGAGCCTGCGCCACCCCGAGGGATGCACCCGGTGGCAGCCAGCACAA
TGGGGAGCCTGCGCCACCCCGAGGGATGCACCCGGTGGCAGCCAGCACAA
-------------------------------------------------A
-------------------------------------------------A
--------------------------------------------------
--------------------------------------------------
TGGGGAGCCTGCGCTGCCCCGAGGGATGCACCAGGTGGCGACCGGCATGG
TGGGGAGCCTGCGCTGCCCCGAGGGATGCACCAGGTGGCGACCGGCATGG
TGGGGAGCCTGCGCTGCCCCGAGGGATGCACCAGGTGGCGACCGGCATGG
TGGGGAGCCTGCGCTGCCCCGAGGGATGCACCAGGTGGCGACCGGCATGG
TGGGGAGCCTGCGCTGCCCCGAGGGATGCACCAGGTGGCGACCGGCATGG
TGGGGAGCCTGCGCTGCCCCGAGGGATGCACCAGGTGGCGACCGGCATGG
TGGGGAGCCTGCGCTGCCCCGAGGGATGCACCAGGTGGCGACCGGCATGG
--------------------------------------------------
--------------------------------------------------
--------------------------------------------------
TGAGGAGCCTGTGCCACCTCGAGGGGTGCACTAGGTAGCGACCGGCGAGG
TGGGGAGCCTGAGGCACCCGGAGAGGTGCACGAGGCGGCGACCGGCACAA
TGGGGGGCGTGGGCCACCCCGAGGGGTGCACGAGGCTGTGACCGGCACAA
TGGGGGGCGTGGGCCACCCCGAGGGGTGCACGAGGCTGTGACCGGCACAA
CGGGGAGCCGGAGTCGCCCTGAGGGGTGCTCCAGGTGGTGGCCGGCACAA
CGGGGAGCCGGAGTCGCCCTGAGGGGTGCTCCAGGTGGTGGCCGGCACAA
TTGGGAGCCTGAGCCGCTCTGAGAGATGCACCAGCTGGCGGCCGGCATGA
TGGGGTGCCTGAGGCGCCCTCAGGGGT-----------------------
CGGGGAGCCGGAGTCGCCCTGAGGGGTGCTCCAGGTGGTGGCCGGCACAA
CGGGGAGCCGGAGTCGCCCTGAGGGGTGCTCCAGGTGGTGGCCGGCACAA
CGGGGAGCCGGAGTCGCCCTGAGGGGTGCTCCAGGTGGTGGCCGGCACAA
TGGGGCGCCTGGGCCACCTCGAGGGATGCATCAGGTGGCTCCCGGCACCA
TGGGGCGCCTGGGCCACCTCGAGGGATGCATCAGGTGGCTCCCGGCACCA
GAGGGAGCCTGAGGCACCCGGAGAGGTGCACGAGGCGGCGACCGGCACAA
TGGGGCGCCTGGGCCACCTCGAGGGATGCATCAGGTGGCTCCCGGCACCA
TGGGGCGCCTGGGCCACCTCGAGGGATGCATCAGGTGGCTCCCGGCACCA
TGGGGCGCCTGGGCCACCTCGAGGGATGCATCAGGTGGCTCCCGGCACCA
TGGGGCGCCTGGGCCACCTCGAGGGATGCATCAGGTGGCTCCCGGCACCA
TGGGGCGCCTGGGCCACCTCGAGGGATGCATCAGGTGGCTCCCGGCACCA
TGGGGCGCCTGGGCCACCTCGAGGGATGCATCAGGTGGCTCCCGGCACCA
TGGGGCGCCTGGGCCACCTCGAGGGATGCATCAGGTGGCTCCCGGCACCA
--------------------------------------------------
--------------------------------------------------
--------------------------------------------------
--------------------------------------------------
--------------------------------------------------
TGGGGAGCCTGAGCCACTCCGAGGAACGCACCAGGTGGCGAGCAGCATGA
TGGGGAGCCTGAGCCACTCCGAGGAACGCACCAGGTGGCGAGCAGCATGA
--GAGAGCCTGAG-----GCGAGGGG------------------------
TGGTGGGCCCGAGCCGCCGCGAGGGATGCACGACGTGGCGACCTG-----
TAGTGGGCCTGAGCCGCCGCGAGGGATGCACGACGTGGCGACCTG-----
TGGTGGGCCTGAGCCGCCGCGAGGGATGCACGACGTGGCGACCTG-----
TGGTGGGCCTGAGCCGCCGCGAGGGATGCACGACGTGGCGACCTG-----
TGGTGGGCCTGAGCCGCCGCGAGGGATGCACGACGTGGCGACCTG-----
TGGGGAGCCTGAGCCACCGCGAGGGATGCAGCACGTGGCGACCGGCACGA
TGGGGAGCCTGAGCCACCGCGAGGGATGCAGCACGTGGCGACCGGCACGA
CGGGGTGCCTGAGCCACCCGGAGGACTGCACGACGTGGCGACCTGCCTGA
CGGGGTGCCTGAGCCACCCGGAGGACTGCACGACGTGGCGACCTGCCTGA
CGGGGTGCCTGAGCCACCCGGAGGACTGCACGACGTGGCGACCTGCCTGA
CGGGGTGCCTGAGCCACCCGGAGGACTGCACGACGTGGCGACCTGCCTGA
CGGGGTGCCTGGGCCACCCGGAGGACTGCACGACGTGGCGACCTGCCTGA
TGGGGTGCCTGGGCCACGCCGAGGCACGCGCCAGGCGGCTGCCGGCACGG
AAGGGCGCCTGGCCCACCCCGTGAGATGCAGCACTTGGCGTCCTG-----
--------------------------------------------------
--------------------------------------------------
TGAGGTGCCTGCACCGCCCTGAGGGATGCACC------------------
TGAGGTGCCTGCACCGCCCTGAGGGATGCACC------------------
TG------------------------------------------------
TG------------------------------------------------
--------------------------------------------------
--------------------------------------------------
TGAGGGGCCTGCGCCTCCTC------------------------------
TGGGGTGCCTGGGCCACGCCGAGGCACGCGCCAGGTGGCTGCCGGCACGG
TGGGGTGCCTGGGCCACGCCGAGGTACGCGCCAGGTGGCTGCCGGCACGG
TGGGGTGCCTGGGCCACGCCGAGGCACGCGCCAGGCGGCTGCCGGCACGG
TGGGGTGCCTGGGCCACGCCGAGGCACGCGCCAGGCGGCTGCCGGCACGG
TGGGGTGCCTGGGCCACGCCGAGGCACGCGCCAGGCGGCTGCCGGCACGG
TGGGGTGCCTGGGCCACGCCGAGGCACGCGCCAGGCGGCTGCCGGCACGG
TGGGGTGCCTGGGCCACGCCGAGGCACGCGCCAGGCGGCTGCCGGCACGG
CGGGGAAGCTGGGCCGCTGTGACGGACGCACCGGATGGCGACCGGCATAA
--------------------------------------------------
TGCGGAGCCTGCGCCACCCCGAAGGATGCACCGGGTGGCGGCGTG-----
TGCGGAGCCTGCGCCACCCCGAAGGATGCACCGGGTGGCGGCGTG-----
TGCGGAGCCTGCGCCACCCCGAAGGATGCACCGGGTGGCGGCGTG-----
TGAGGAGCCCGAGCCGCCCCGACGGGTGCACCGCATGGCGGCCGGCA-CA
TGGGGGGCCTGGGCCCTCCCGAGGGGCGCAGCAGGTGGCGACCTGCA-GA
TGGGGGGCCTGGGCCCTCCCGAGGGGCGCAGCAGGTGGCGACCTGCA-GA
TGTGGAGCCCGCGCCACCGTGAAGGATGCCCCAGGTGGCGACCGGCATCA
TGGGGAGCCTGAGCCATCCCGAGGGATGCACC-GGTAGCGGCCGGCATGA
TGGGGGGCCTGGGCCCTCCCGAGGGGCGCAGCAGGTGGCGACCTGCA-GA
TGGGGGGCCTGGGCCCTCCCGAGGGGCGCAGCAGGTGGCGACCTGCA-GA
TGGGGGGCCTGGGCCCTCCCGAGGGGCGCAGCAGGTGGCGACCTGCA-GA
TGGGGGGCCTGGGCCCTCCCGAGGGGCGCAGCAGGTGGCGACCTGCA-GA
TGGGGGGCCTGGGCCCTCCCGAGGGGCGCAGCAGGTGGCGACCTGCA-GA
TGGGGAACCTGAGTCACCCTGAGGGGTGCACC-GGTGGCGACCGGCGAAA
TGGGGCGCCTGGGCCACCCCGAGGAATGCACCACGTGGCGACCGGCAGAG
TGGGGAGCCTGTGCCGCGCCGAGGGATGCAGCACGTGGCACCCGGCATGA
TGGGGAGCCTGTGCCGCGCCGAGGGATGCAGCACGTGGCACCCGGCATGA
TGGGGAGCCTGTGCCGCGCCGAGGGATGCAGCACGTGGCACCCGGCATGA
TGGGGAGCCTGTGCCGCGCCGAGGGATGCAGCACGTGGCACCCGGCATGA
TGGGGCGCCTGGGCCACCCCGAGGAATGCACCACGTGGCGACCGGCACAA
--------------------------------------------------
TGGGAAGCCGGAGCCACCC-GATGGATGCACC-GGTGGCGACGGGCATGA
TGGAGAGCCTGAGCCACCCCGAGGGATGCACGAGGTGGCGACCGGCAGAA
TGGAGAGCCTGAGCCACCCCGAGGGATGCACGAGGTGGCGACCGGCAGAA
TGGGGAGGAGGAGCCACCCCGAGGAATGCAGCACGTGGCAACCGGCACAA
TGGGGAGGAGGAGCCACCCCGAGGAATGCAGCACGTGGCAACCGGCACAA
TGGGGAGGAGGAGCCACCCCGAGGAATGCAGCACGTGGCAACCGGCACAA
TGGGGAGGAGGAGCCACCCCGAGGAATGCAGCACGTGGCAACCGGCACAA
TGGGGAGGAGGAGCCACCCCGAGGAATGCAGCACGTGGCAACCGGCACAA
TGGGGAGGAGGAGCCACCCCGAGGAATGCAGCACGTGGCAACCGGCACAA
TGGGGAGGAGGAGCCACCCCGAGGAATGCAGCACGTGGCAACCGGCACAA
TGGGGAGGAGGAGCCACCCCGAGGAATGCAGCACGTGGCAACCGGCACAA
TGGGGCGCCTGGGCCACCCCGAGGAATGCACCACGTGGCGACCGGCACAA
TGGGGCGCCTGGGCCACCCCGAGGAATGCACCACGTGGCGACCGGCACAA
TGTGAAGCCTGCGCCACACCGAGGGATGCACCAGGTGGCGGCCGGCGTGA
TGTGAAGCCTGCGCCACACCGAGGGATGCACCAGGTGGCGGCCGGCGTGA
TGTGAAGCCTGCGCCACACCGAGGGATGCACCAGGTGGCGGCCGGCGTGA
TGGGGAGCCTGCGCCACACCGAGGGATGCACCAGGTGGCGGCCGGCGTGA
TGGGGAGCCTGCGCCACACCGAGGGATGCACCAGGTGGCGGCCGGCGTGA
TGTGAAGCCTGCGCCACACCGAGGGATGCACCAGGTGGCGGCCGGCGTGA
TGTGAAGCCTGCGCCGCACCGAGGGATGCACCAGGTGGCGGCCGGCGTGA
TGGGGAGTCTGAGCCACCCCGAGGGATGCACCAGATGGCGACCTGCGAA-
TGGGGAGTCTGAGCCACCCAGAGGGATGCACCAGATGGCGACCTGCGAA-
TGGGGCGGCTGCGCCACCCCGAGGGATGCACCAG----------------
TGGGGAGTCTGAGCCACCCCGAGGGATGCACCAGATGGCGACCTGCGAA-
TGGGGAGCCTGTGCCATCGCGATGGATGCACC-GGTGGCGACCGGCACAA
TGGGGAGCCTGTGCCATCGCGATGGATGCACC-GGTGGCGACCGGCACAA
TGGGGGGCCTGCGCCACGCCGGGGGATGCACGAGGTAGCGACCGGCATGA
TGGGGGGCCTGCGCCACGCCGGGGGATGCACGAGGTAGCGACCGGCATGA
TGGGGGGCCTGCGCCACGCCGGGGGATGCACGAGGTAGCGACCGGCATGA
--------------------------------------------------
TGGGGGGCCTGCGCCACGCCGGGGGATGCACGAGGTAGCGACCGGCATGA
--------------------------------------------------
--------------------------------------------------
--------------------------------------------------
--------------------------------------------------
--------------------------------------------------
TGCGGAGCCTGAGCCACCCCGAGATATGCACCAGGTGGCGACCGGCAGGG
TGCGGAGCCTGAGCCACCCCGAGATATGCACCAGGTGGCGACCGGCAGGG
TGCGGAGCCTGAGCCACCCCGAGATATGCACCAGGTGGCGACCGGCAGGG
TGTGGGGCCTGCGCCACGCCGGGGGATGCACGAGGTAGCGACCGGCATGA
TGCGGAGCCTGAGCCACCCCGAGATATGCACCAGGTGGCGACTGGCAGGA
TGGGGAGCCTGCGCCACCGCGAGGGGTGCGCCAGGCGGTGGCCGGCATGA
TGGGGAGCCTGCGCCACCGCGAGGGGTGCGCCAGGCGGTGGCCGGCATGA
TGGGGAGCCTGCGCCACCGCGAGGGGTGCGCCAGGCGGTGGCCGGCATGA
TGGGGAGCCTGCGCCACCGCGAGGGGTGCGCCAGGCGGTGGCCGGCATGA
TGGGGAGCCTGCGCCACCGCGAGGGGTGCGCCAGGCGGTGGCCGGCATGA
TGGGGATCCCGCGCCGCCCCGAGGGACGCACC-GGTGGCGCGCGGCGTGA
TGGGGATCCCGCGCCGCCCCGAGGGACGCACC-GGTGGCGCGCGGCGTGA
TGGGGATCCCGCGCCGCCCCGAGGGACGCACC-GGTGGCGCGCGGCGTGA
TGGGGATCCCGCGCCGCCCCGAGGGACGCACC-GGTGGCGCGCGGCGTGA
TGGGGATCCCGCGCCGCCCCGAGGGACGCACC-GGTGGCGCGCGGCGTGA
TGGGGAGCCTGCGCCACCGCGAGAAGAACATCAGGTGGCGGCCGGCACAA
TGGGGAGCCTGCGCCACCGCGAGGGGTGCGCCAGGCGGTGGCCGGCATGA
TGGGGAGCCTGCGCCGCCGCGAG--ACGCACCACGCGGCCGCCGGCACGA
TGGGGAGCCTGCGCTGCCGCGAG--ACGCACCACGCGGCCGCCGGCACGA
TGGGGAGCCTGCGCCGCCGCGAG--ACGCACCACGCGGCCGCCGGCACGA
TGGGGAGCCTGCGCCGCCGCGAG--ACGCACCACGCGGCCGCCGGCACGA
TGGGGAGCCTGCGCCGCCGCGAG--ACGCACCACGCGGCCGCCGGCACGA
TGGGGAGCCTGCGCCGCCGCGAG--ACGCACCACGCGGCCGCCGGCACGA
TGGGGAGCCTGCGCCGCCGCGAG--ACGCACCACGCGGCCGCCGGCACGA
TGGGGAGCCTGCGCTGCCGCGAG--ACGCACCACGCGGCCGCCGGCACGA
TGGGGAGCCTGCGCTGCCGCGAG--ACGCACCACGCGGCCGCCGGCACGA
TGGGGAGCCTGCGCCACCGCGAGGGGTGCGCCAGGCGGTGGCCAGCATGA
TGGGGAGCCTGCGCCACCGCGAGGGGTGCGCCAGGCGGTGGCCGGCATGA
--------------------------------------------------
CGGGGGGCCTGAGCCACCCCGAGGGATGCACAAGTGGTGAACCGGCATGA
CGGGGGGCCTGAGCCACCCCGAGGGATGCACAAGTGGTGAACCGGCATGA
--------------------------------------------------
--------------------------------------------------
TG------------------------------------------------
TG------------------------------------------------
TG------------------------------------------------
TG------------------------------------------------
TG------------------------------------------------
TG------------------------------------------------
TGGGGAGCC--AGCCACCCCGAGCGATGCGCCATGTGGCGACCGGCACGA
TGGGGAGCC--AGCCACCCCGAGCGATGCGCCAT-----GGGCGGCAC--
CGGGGGGCCTGAGCCACCCCGAGGGATGCACAAGTGGTGAACCGGCATGA
CGGGGGGCCTGAGCCACCCCGAGGGATGCACAAGTGGTGAACCGGCATGA
TGGGGAGCCTGGGTCCCCGCGAGGGACGCGCCGGGTGGCG----------
TGGGGAGCCTGGGTCCCCGCGAGGGACGCGCCGGGTGGCG----------
TGGGGAGCCTGGGTCCCCGCGAGGGACGCGCCGGGTGGCG----------
TG------------------------------------------------
TAGGGGGCTCGGG-------GAGGGGTGCACCAGGTGGCGGCTGGCA-GG
TAGGGGGCTCGGG-------GAGGGGTGCACCAGGTGGCGGCTGGCA-GG
TGGGGAGCCTGCGCCACCGGGAGGGATGGACGAGGTGGTGGCCCGGGTAA
TGGGGAGCCTGCGCCACCGGGAGGGATGGACGAGGTGGTGGCCCGGGTAA
TGGGGAGCCTGCGCCACCGGGAGGGATGGACGAGGTGGTGGCCCGGGTAA
TGGGGAGCCTGCGCCACCGGGAGGGATGGACGAGGTGGTGGCCCGGGTAA
--------------------------------------------------
--------------------------------------------------
--------------------------------------------------
--------------------------------------------------
TGGAGAGCCTGAGCCACC-------------------GCGAACGACACAG
TGGGGAACTTGAGCCTCT--GAGGGGTGCCGC--GCGGCGACCGCCACAG
TGGGGAACTTGAGCCTCT--GAGGGGTGCCGC--GCGGCGACCGCCACAG
CGGGCCGCCTGTGCCACCCCGAGTGGTGCGCTATGTGGGGAGCAGCATAA
CGGGCCGCCTGTGCCACCCCGAGTGGTGCGCTATGTGGGGAGCAGCATAA
CGGGCCGCCTGTGCCACCCCGAGTGATGCGCTATGTGGGGAGCAGCATAA
CGGGGCGCCTGTGCCACCCCGAGTGATGCGCTATGTGGGGAGCAGCATAA
CGGGCCGCCTGTGCCACCCCGAGTGGTGCGCTATGTGGGGAGCAGCATAA
CGGGCCGCCTGTGCCACCCCGAGTGGTGCGCTATGTGGGGAGCAGCATAA
CGTGCAGCCTGCG-------------------------------------
CGTGCAGCCTGCG-------------------------------------
CGTGCAGCCTGCG-------------------------------------
CGTGCAGCCTGCG-------------------------------------
CGTGCAGCCTGCG-------------------------------------
TGGGGAGCGTGGGCCACCCCGAGGGTCGCACGAGGTGGCGACCGGCACAA
TGGGGAGCGTGGGCCACCCCGAGGGTCGCACGAGGTGGCGACCGGCACAA
TGGGGAGCGTGGGCCACCCCGAGGGTCGCACGAGGTGGCGACCGGCACAA
TGGGGAGCGTGGGCCACCCCGAGGGTCGCACGAGGTGGCGACCGGCACAA
TGGGGAGCGTGGGCCACCCCGAGGGTCGCACGAGGTGGCGACCGGCACAA
TGGGGAGCGTGGGCCACCCCGAGGGTCGCACGAGGTGGCGACCGGCACAA
TGGGGTGCTTGAGCCACCCCGATGGCTGCACT-GGTGGCGACC-------
TGGGGTGCTTGAGCCACCCCGATGGCTGCACT-GGTGGCGACC-------
TGGGGTGCTTGAGCCACCCCGATGGCTGCACT-GGTGGCGACC-------
TGGGGTGCTTGAGCCACCCCGATGGCTGCACT-GGTGGCGACC-------
TGGAGAGCCTG--CCCCATCGAAGGATGCACCAGGTGGCGCCCGGCACCA
TG--AAGCCCAAACCCTCCCAAGGGACGCGGCGGGCGACAGCCGGGTTCA
GGGGGAGCCTGAGGCACTTCGAGGGACGCACGAAGTGGCGGCCGGCATGA
--------------------------------------------------
---------------------------------GATGA--ATCG-CAGGA
TGGGGAGCCTGAGCCAGCAGGCGG-GTGCAC-GGGTGCTGGGTGGGACAA
TGGGGAGCCTGAGCCAGCAGGCGG-GTGCAC-GGGTGCTGGGTGGGACAA
GGGGGAGCCTGAGCCCCCCCGAGGGATGCACCAGGTCGCGGCCGGCGTCG
GGGGGAGCCTGAGCCCCCCCGAGGGATGCACCAGGTCGCGGCCGGCGTCG
GGGGGAGCCTGAGCCCCCCCGAGGGATGCACCAGGTCGCGGCCGGCGTCG
GGGGGAGCCGGAGCCACCGCGAGGGATGCGCCAGGCGGCGACCGGCATGA
GGGGGAGCCGGAGCCACCGCGAGGGATGCGCCAGGCGGCGACCGGCATGA
GGGGGAGCCGGAGCCACCGCGAGGGATGCGCCAGGCGGCGACCGGCATGA
TGGGGAGCCTGAGCCAGC---AGCGGTGCACG-GGTGCTGGGTGGGACAA
GGGGGAGCCGGAGCCACCGCGAGGGATGCGCCAGGCGGCGACCGGCATGA
GGGGGAGCCGGAGCCACCGCGAGGGATGCGCCAGGCGGCGACCGGCATGA
TGGGGAGACTGCGCCACCTCGAAGGATGCACCAGGTAGCGACCGGCATAA
TGGGGAGACTGGACCATCCCGAGGGATGCACCACGTGGCGGCCGGCATGA
--------------------------------------------------
TGGGGGGCCTGGGCCACCGCGAGGGATGCACCCGGTGGCGGCCGGCATGG
TGGGGGGTCTGGGCCACCGCGAGGGATGCACCCGGTGGCGGCCGGCATGG
TGGGGGGCCTGGGCCACCGCGAGGGATGCACCCGGTGGCGGCCGGCATGG
TGGGGGGCCTGGGCCACCGCGAGGGATGCACCCGGTGGCGGCCGGCATGG
--------------------------------------------------
------------------------GATGGAGCTGGT--------------
------------------------GATGGAGCTGGT--------------
TGGGGCGCCTGAGCCGCTCTGAGGGATGCACCACGTG-------------
------------------------GATGGAGCTGGT--------------
------------------------GATGGAGCTGGT--------------
------------------------GATGGAGCTGGT--------------
TGGGGCGCCTGAGCCGCTCTGAGGGATGCACCACGTG-------------
TGGGGGGCCTGGGCCACCGCGAGGGATGCGCCCGGTGGCGGCCGGCATGG
TGGGGGGCCTGGGCCACCGCGAGGGATGCACCCGGTGGCGGCCGGCATGG
TGGGGGGCCTGGGCCACCGCGAGGGATGCACCCGGTGGCGGCCGGCATGG
TGGGGGGCCTGGGCCACCGCGAGGGATGCACCCGGTGGCGGCCGGCATGG
CCGGGGGCCTCAGCCACCCCGAGGGGTGTACCGGATGGGGACCTGCCCAA
CCGGGGGCCTCAGCCACCCCGAGGGGTGTACCGGATGGGGACCTGCCCAA
TGGGGAGCCTGAGTGACCCCGAGGGACGCACGAACTGGCGACTGGCATGA
TGGGGAGCCTGAGTGACCCCGAGGGACGCACGAACTGGCGACTGGCATGA
TAGGGAGCCTGAGCCACCTCGAGGGATGCACCAACTGGGGGTGGGCATGG
TGGGGAGCCTGAGCGACCCCGAGGGATGCGCCAGGTGGCGACCACCACCA
TGGGGGGCCTGGGCCACCGCGAGGGATGCACCCGGTGGCGGCCGGCATGG
TGGTGAGCCTGAGCCACCGCGAGGGACGCACAATACGACGACTGGCATGA
TGGTGAGCCTGAGCCACCGCGAGGGACGCACAATACGACGACTGGCATGA
TGGTGAGCCTGAGCCACCGCGAGGGACGCACAATACGACGACTGGCATGA
--------------------------------------------------
TGGGGA-CATGAG------------GTGC-CCAGGTGG------------
TCGGGAGCCTAAGGCCCC--AAGGCATACACGATATGACGACCGGCATAA
TGGAGAGCCTGGGCGAC---GAGAGATGCGCCAGGTGGTGGCCGGCACAA
TGGAGAGCCTGGGCGAC---GAGAGATGCGCCAGGTGGTGGCCGGCACAA
TGGAGAGCCTGGGCGAC---GAGAGATGCGCCAGGTGGTGGCCGGCACAA
TGGGGACGCCGTGCCAGGTG------------------------------
TGGGGACGCCGTGCCAGGTG------------------------------
--------------------------------------------------
TCGGGAGGCTGAGACACCGTGAGAGATGCGCCACGTGGCGCCCGGCATGA
TGGGGGGTCTGAGCCACCGTGAGGGATGCACCAC----------------
TAGGGAGCCCGAGGCTCCT-GAG--ATGCACC-GTGGGGGACCGGCATGA
TGGGCAGCCTGAGCCACCCCGAGGTATGCGCGATGTAGCGACCGGCATGA
TGGAGGGCCCGAGCCACCCCGAAGGATGCACCACATGGCGATCGGCATGA
TGAGGAGCCTGCGCCACCCCGAGGGACGCACGAGGTGGCGACCGG-----
TGAGGAGCCTGCGCCACCCCGAGGGACGCACGAGGTGGCGACCGG-----
TGAGGAGCCTGCGCCACCCCGAGGGACGCACGAGGTGGCGACCGG-----
TGAGGAGCCTGCGCCACCCCGAGGGACGCACGAGGTGGCGACCGG-----
TGGAGGGCCCGAGCCACCCCGAAGGATGCACCACATGGCGATCGGCATGA
CGGGCAG-CTGAGCTACGCCGAATGATGCACCAGGTGGCGACCGGCACGA
TG-GCAGCCTGAGTTACTCCGAGGAATGCACCGGTTACGGCCTGGCATGA
TG------------------------------------------------
TGGCGAGCCGGAGTCACTGCGAGGGGTGC--GAGGTGGCGACCTGCATGA
TGGCGAGCCGGAGTCACTGCGAGGGGTGC--GAGGTGGCGACCTGCATGA
TGCGGGGCTGGAGCCACCCCGAACGCTGCACCACGTGGCGACTGGCGCGA
TG-GGAGCCCGAGTCGCGCCGAGGGACCCACCTGGTGGCGACCGG--GCA
TG-GGAGCCCGAGTCGCGCCGAGGGACCCACCTGGTGGCGACCGG--GCA
TG-GGAGCCCGAGTCGCGCCGAGGGACCCACCTGGTGGCGACCGG--GCA
TGGAGAGCCTGAGCCACTCCGAGGGACCCACCAGGTGGCGACCGGCATGA
TGGAGAGCCTGAGCCACTCCGAGGGACCCACCAGGTGGCGACCGGCATGA
TGTGGAGCGTGTGGCCGC--GAGGGTTGCACGAGGTAGAAACCAGCATGA
TGAGGAGACTGCGCCAACGCGAAG-ATGCACGAGGTGGCGACCGGCATGA
TGAGGAGACTGCGCCAACGCGAAG-ATGCACGAGGTGGCGACCGGCATGA
TGGGGGGCCTGCGCCACCCCGAGGGATGCAGCAGGTGGTGACCGGCATGA
TGGGGGGCCTGCGCCACCCCGAGTGATGCAGCAGGTGGTGACCGGCATGA
TGGGGAGGCCGAGCCACCCCAAGG-----CGCACGTGGGGACCGGCATGA
TGGGGAAGCTGAGCCACCCCAAGG-ACGCACGAGGCGGCGACTTGCATGA
TGGGGAGGCCGAGCCACCCCAAG--GCGCACGGGGTGGGGACCGGCATGA
CG------TATAGTCATCCAGAGGGATGCGCCATATTGCGACCAACACGA
TGGGAAGCCTGCGCCCCTCCGCGGGACGCACCAGGTGGGGACTGGCACAA
TGGGAAGCCTGCGCCCCTCCGCGGGACGCACCAGGTGGGGACTGGCACAA
TGCGGGGCCGGAGCCACCCCGAACGCTGCACCACGTGGCGACTGGCGCGA
TGCGGGGCCGGAGCCACCCCGAACGCTGCACCACGTGGCGACTGGCGCGA
TGCGGGGCCGGAGCCACCCCGAACGCTGCACCACGTGGCGACTGGCGCGA
TGCGGGGCCGGAGCCACCCCGAACGCTGCACCACGTGGCGACTGGCGCGA
TGGGGAGCCTGTGCCATCGCGAGGGATGCACCAGGTGGCAACCGGCACGA
CAGAGAGCCTGGGCCCGCGCGAGGG-T-----------------------
TGGGGAGCCTGTGCCATCGCGAGGGATGCACCAGGTGGCAACCGGCACGA
TGGGGAGCCTGTGCCATCGCGAGGGATGCACCAGGTGGCAACCGGCACGA
TGGGGAGCCTGTGCCATCGCGAGGGATGCACCAGGTGGCAACCGGCACGA
TGGGGAGCCTGTGCCATCGCGAGGGATGCACCAGGTGGCAACCGGCACGA
CGGAGAGCCTGGGCCCGCGCGAGGGTCGCGCCAC------------GCGA
TGGGGAGCATGCGCTACCTCGAGGGGGTCGCCACGTGGCGACCGGCACGA
TGGGGAGCCTGTGCCATCGCGAGGGATGCACCAGGTGGCAACCGGCACGA
TGGGGAGGCCGAGTCGTCCCGAGGAATGCAGGTGCTGCGGACCGG-----
CGAGGAGCCTGGACCACCCCGCGGGATGCACCAGGTGGCAACCTGCCTGA
CGAGGAGCCTGGACCACCCCGCGGGATGCACCAGGTGGCAACCTGCCTGA
TGGTGAGCCTGAGCCGTCCCAAGCGATGCGCCAGGTGGCGACCTGC-TCA
GGGGGAGCCTGAGCCACCGCGAAGGACGCGCCACGTGCGAAGCGG-----
GGGGGAGCCTGAGCCACCGCGAAGGACGCGCCACGTGG-TAC--------
GGGGGAGCCTGAGCCACCGCGAAGGACGCGCCACGTACGAAGCGG-----
GGGGGAGCCTGAGCCACCGCGAAGGACGCGCCACGTGCGAAGCGG-----
TGGGGAGGCCGAGTCGTCCCGAGGAATGCA--------------------
TGGGGAGGCCGAGTCGTCCCGAGGAATGCA--------------------
TGGGGAGGCCGAGTCGTCCCGAGGAATGCA--------------------
TGGGGAGGCCGAGTCGTCCCGAGGAATGCA--------------------
--------------------------------------------------
--------------------AAGGGACGCGCCAG---GTGGCAACCAGCA
CA---------------CCCGATGGATGCACCAGGTGGTGACCGACATAA
TGGGGAGCCTGGGCCGCCGCGAGTGATGCGGCAGGTGGGGACGGGCAC--
TGGGGAGCCTGGGCCGCCGCGAGTGATGCGGCAGGTGGGGGC-GG-----
TG------------------GACGGATGGTGGGGGTG-GGGC-GG-----
TGGGGAGCCTGGGCCGCCGCGAGTGATGCGGCAGGTGGGGACGGGCATGG
TGGGGAGCCTGGGCCGCCGCGAGTGATGCGGCAGGTGGGGACGGGCATGG
TGGGGAGCCTGGGCCGCCGCGAGTGATGCGGCAGGTGGGGGC-GG-----
TGGTGAGCCTGAGCCATCCCAAGCGATGCGCCAGCTGGCGAGCGGCATGA
TAGGCTGCCTCGGCCACCCCGAGGAATGCACGAGGTGGCGGCCGGCA-GA
TAGGCTGCCTCGGCCACCCCGAGGAATGCACGAGGTGGCGGCCGGCA-GA
TGGGGAGCCTGGGCCACCGCGAATAATGCAGCAGGTGGGGACCGGCATGG
TGGGG---------------------------------------------
TGGGG---------------------------------------------
TGGGGAGCCCCCGACACCTCGAGGGAGGCACTGGGTGGCGGTGGGCATGA
TGGTGAGCCTGAGCCATCCCAAGCGATGCGCCAGCTGGCGACCTGC-TCA
TGGTGAGCCTGAGCCATCCCAAGCGATGCGCCAGCTGGCGACCTGC-TCA
TGGTGAGCCTGAGCCATCCCAAGCGATGCGCCAGCTGGCGACCTGC-TCA
TGGTGAGCCTGAGCCATCCCAAGCGATGCGCCAGCTGGCGACCTGC-TCA
TG------------------------------------------------
GG-GGAGCCCGAGACGCCCCGAGGGATGCGCAAGGTGGCGACCGGCACGA
TG-GGACTGTGACACAC---------------------------------
TG------------------------------------------------
TG------------------------------------------------
TG------------------------------------------------
TG------------------------------------------------
TGGGCAGCCTGAGCCACTCCGAGGGGTGCACCAGGTGGCGACCGGCCTGA
TGGGCAGCCTGAGCCACTCCGAGGGGTGCACCAGGTGGCGACCGGCCTGA
TGGGGAGCCTGCGCCACACCGAATGATGCACCACGTGGCGACCGGCATGA
CTGGGAGCCCGAGACGCCCCGAGGGATGCGCAAGGTGGCGACCGGCACGA
TTTGGGGCCTTGGCTACCGC-AGGGATG-GCGGGGGGGTGACC--TACGG
--------------------------------------------------
TGGGGAGCCTCAGCCACCTCGAGGGATGCATCAGGCGGCAACCGGCCTGA
TGGGGAGCCTCAGCCACCTCGAGGGATGCACCAGGCGGCAACCGGCCTGA
TGGGGAGCCTCAGCCACCTCGAGGGATGCATCAGGCGGCAACCGGCCTGA
CTGGGAGCCCGAGACGCCCCGAGGGATGCGCAAGGTGGCGACCGGCACGA
CTGGGAGCCCGAGACGCCCCGAGGGATGTGCAAGGTGGCGACCGGCACGA
CTGGGAGCCCGAGACGCCCCGAGGGATGTGCAAGGTGGCGACCGGCACGA
CTGGGAGCCCGAGACGCCCCGAGGGATGCGCAAGGTGGCGACCGGCACGA
TGGGGCGGCTCAGGCGCCCCGAGGGATGCACCACGTGGCGAGCAGCATGG
TGGGGCGGCTCAGGCGCCCCGAGGGATGCACCACGTGGCGAGCAGCATGG
TGGGGCGGCTCAGGCGCCCCGAGGGATGCACCACGTGGCGAGCAGCATGG
TGGGGCGGCTCAGGCGCCCCGAGGGATGCACCACGTGGCGAGCAGCATGG
TGGGGCGGCTCAGGCGCCCCGAGGGATGCACCACGTGGCGAGCAGCATGG
TGGGGAGGCTGGGCTGCCC-GAGCGATGCGCCACGTGGCGACCGGCATGC
CGGTGCG-------------------------------------------
TGGGGAGTCTGCGCCACCGCAAGTGATGCACAGGGTGGCGACCGGCACAA
CGGTGCG-------------------------------------------
CGGTGCG-------------------------------------------
CGGTGCG-------------------------------------------
TGGGAGTTCCGGGTCACCGCGAGGGATGGACCAGGTGGCGACTGGCACAA
TGGGGGGCCTGCACCACCGCGAGGGATGCGCCAGGTGGTGACCGGCACAA
TGGGGGGCCTGCACCACCGCGAGGGATGCGCCAGGTGGTGACCGGCACAA
TGGGGAGGCTGAGCGACC--------------------------------
TGGAGAGCCTGGGTGACCCCGAGAGATGCAGCAGGCGGCTGCCGGCATGA
TGGGGAGTCCGGGTCACCGCGAGGGATGGACCAGGTGGCGACTGGCACAA
TGGGGAGTCCGGGTCACCGCGAGGGATGGACCAGGTGGCGACTGGCACAA
TGGGGAGGCTGAGCCGCCGCGAGGGATGCGCGAGGTGGGGACTGTCATCA
TGGGGAGGCTGAGCCGCCGCGAGGGATGCGCGAGGTGGAGACTGTCATCA
TGGGGAGGCTGAGCCGCCGCGAGGGATGCGCGAGGTGGAGACTGTCATCA
TGGGGAGGCTGAGCCGCCGCGAGGGATGCGCGAGGTGGAGACTGTCATCA
TGGGGAGGCTGAGCCGCCGCGAGGGATGCGCGAGGTGGAGACTGTCATCA
TGGGGGGCCTGCACCACCGCGAGGGATGCGCCAGGTGGTGACCGGCACAA
TGGGGGGCCTGCACCACCGCGAGGGATGCGCCAGGTGGTGACCGGCACAA
TGGGCAGGCT----------------------------------------
GGGGGAGCCTGAGCCGCCGCGCGGGACGCACCGGGTGGCGACCACTATGA
TGGGGAGGCTGAGCCACCCTGAGGGATGCACCACGTGGCGGCCGGCATGA
TGGGGAGGCTGAGCCACCCTGAGGGATGCACCACGTGGTGGCCGGCATGA
TGGGGAGGCTGAGCCACCCTGAGGGATGCACCACGTGGCGGCCGGCATGA
TGGGGAGGCTGAGCCACCCTGAGGGATGCACCACGTGGCGGCCGGCATGA
TGGGGAGGCTGAGCCACCCTGAGGGATGCACCACGTGGCGGCCGGCATGA
TGGGGAGGCTGAGCCACCCTGAGGGATGCACCACGTGGCGGCCGGCATGA
TGGGGAGGCTGGGCTGCCC-GAGCGATGCGCCACGTGGCGACCGGCATGC
TGGGGAGGCTGGGCTGCCC-GAGCGATGCGCCACGTGGCGACCGGCATGC
TGGGGAGGCTGGGCTGCCC-GAGCGATGCGCCACGTGGCGACCGGCATGC
TGGGGAGGCTGAGCGACC--------------------------------
TGGGGAGCCTGCGCGCCGC-GAGGGAGACACTAGGTGGCGAGCGGCACCA
TGGGGAGCTTTATCGACCCCGAGGGGTGCACCCGGTGG-GGGCGGCACAA
--------------------------------------------------
--------------------------------------------------
--------------------------------------------------
TGGGGAGCCTGCGCCACTCCGAGG-GCGCGGCAGGTGGCGACCGGCGCAA
TGGGGAGCCTGCGCCACTCCGAGG-GCGCGGCAGGTGGCGACCGGCGCAG
TGGGGAGTCTGCGCCACTCCGAGG-GCGCGGCAGGTGGCGACCGGCGCAG
TGGGGAGCCTGCGCCACTCCGAGG-GCGCGGCAGGTGGCGACCGGCGCAA
TGGGGAGCCTGCGCCACTCCGAGG-GCGCGGCAGGTGGCGACCGGCGCAG
TGGGGAGTCTGCGCCACTGCGAGG-GCGCGGCAGGTGGCGACCGGCGCAA
TGGGGAGTCTGCGCCACTGCGAGG-GCGCGGCAGGTGGCGACCGGCGCAG
TGGGGAGCCTGCGCCACTCCGAGG-GCGCGGCAGGTGGCGACCGGCGCAA
TGGGGAGTCTGCGCCACTGCGAGG-GCGCGGCAGGTGGCGACCGGCGCAG
TGGGGAGCCTGCGCCGCCGCGAGGGAGACACTAGGTGGCGAGCGGCACCA
TGGGGAGCCTGCGCCACCCCAAGGGCGGCACCAC----------------
TGGGGAGCCTGCGCCACCCCAAGGGCGGCACCAC----------------
TGGGGATCCTTTAGGACCCCGAGGGGTGCACCCGGTGGCGG----CGTGC
TGGGGAGCGTGCACCGCCGCGCGGGATGCACCAA----------------
TGGGGGGGCTGTGCCACCCCGGGGGATGCGCGAGGTGGGTGCCGGCGTGA
TGGGGGGGCTGTGCCACCCCGGGGGATGCACGAGGTGGGTGCCGGCGTGA
TGGGGGGGCTGCGCCACCCCGGGGGATGCACGAGGTGGGTGCCGGCGTGA
TGGGGGGGCTGCGCCACCCCGGGG-ATGCACGAGGTGGGTGCCGGCGTGA
TGGGGGGGCTGCGCCACCCCGGGGGATGCACGAGGTGGGTGCCGGCGTGA
TGGGGGGGCTGCGCCACCCCGGGGGATGCACGAGGTGGGTGCCGGCGTGA
TGGGGGGGCTGTGCCACCCCGGGGGATGCACGAGGTGGGTGCCGGCGTGA
TGGGGGGGCTGTGCCACCCCGGGGGATGCACGAGGTGGGTGCCGGCGTGA
TGGGGGGGCTGCGCCACCCCGGGGGATGCACGAGGTGGGTGCCGGCGTGA
TGGGGGGGCTGCGCCACCCCGGGGGATGCACGAGGTGGGTGCCGGCGTGA
TGGGGGGGCTGCGCCACCCCGGGGGATGCACGAGGTGGGTGCCGGCGTGA
TGGGGGGGCTGCGCCACCCCGGGGGATGCACGAGGTGGGTGCCGGCGTGA
TGTGGAGCCTCCGCCACCCCGAGGAATGCACCAGCTGGAGACCAACATGA
TCGGAAGGATAAGCCACCCCGAGAGATGCGCCACGTGGCCACCGGCATGG
TGCGCAGCCTGCGCCGCCCCGAGGCATGCACCAGGTGGCGACCAGCGTGG
TGCGCAGCCTGCGCCGCCCCGAGGCATGCACCAGGTGGCGACCAGCGTGG
TGCGCAGCCTGCGCCGCCCCGAGGCATGCACCAGGTGGCGACCAGCGTGG
TGCGCAGCCTGCGCCGCCCCGAGGCATGCACCAGGTGGCGACCAGCGTGG
TGGGGAGCCTGCGCCACCTCAAGGGAGGCACCCGGTGGCGAC--------
TGGGGAGCGTGCGTCACCCCGAGGGGTGCAGCAGGTGAGGACCGGCATGG
TGGGGACCCTGAGTCACCCCAATTGGTGCACTAAGTGGCGACCGGCATAA
TGGGGGGCCGGGGTTGCCCCGAGGGATGTACCAGGTGGCGGCCGGCATAA
--------------------------------------------------
TGGGGAGCCTGCGGCACTC-GTGGAATGCACCAGGTGGCGGCCGACATGA
TGGGGAGCCTGCGGCACTC-GTGGAATGCACCAGGTGGCGGCCGACATGA
TGGGGAGCCTGCGGCACTC-GTGGAATGCACCAGGTGGCGGCCGACATGA
CGGGTAGCCTGGGCCACCATGAGGGATGCGCCAGGTGGCGACCGGCACAA
CGGGTAGCCTGGGCCACCATGAGGGATGCGCCAGGTGGCGACCGGCACAA
CGGGTAGCCTGGGCCACCATGAGGGATGCGCCAGGTGGCGACCGGCACAA
TGGGGGGCCGGGGCCCCGC-GAGGGATGCACCAGGTGGCGGCTGGCATAA
TGGGGGGCCGGGGCCCCGC-GAGGGATGCACCAGGTGGCGGCCGGCATAA
TGGGGGGCCGGGGCCCCGC-GAGGGATGCACCAGGTGGCGGCCGGCATAA
TGGGGGGCCGGGGCCCCGC-GAGGGATGCACCAGGTGGCGGCCGGCATAA
TGGGGGGCCGGGGCCCCGC-GAGGGATGCACCAGGTGGCGGCCGGCATAA
TGGGGAGCCTGGGTCTC---GGGGGGTGCACCAGGTGGTGATCGGCACAA
TGGGGAGCCTGGGTCTC---GGGGGGTGCACCAGGTGGTGATCGGCACAA
TGGGGAGCCTGAGCCCC---GAGGGCTGCACCGGGTGGGGACGGGCATGA
TGGGGAGCCTGAGCCCC---GAGGGCTGCACCGGGTGGGGACGGGCATGA
TGGGAAGCCTGAATCATCCCGAGGGATGCACCCGGTGGCAACCTCCATGA
--------------------------------------------GCACAA
--------------------------------------------GCACAA
--------------------------------------------GCACAA
--------------------------------------------------
--------------------------------------------------
--------------------------------------------------
--------------------------------------------------
--------------------------------------------------
AGAGGAGCCTGGGCCCGCCAGGGGGATGCTCCAGGTCGAGACCGGCACGA
--------------------------------------------------
TGGGGCGCCTGAGCGACCGCGCGGAATGCACTGGGTGGCGACCCGC--GA
TGGGGCGCTGGAGCCACCCCGCGGAATGCACCCGGTGGCGACCGGCATAG
TGGGGAGCCTGCGCCACCCCGAGGGATGCACCAAGTGACGCCCGGCACGA
TGGGGCGCCTGGGCTACCCCGAGGGGCGCACCAGGTGGGGACCGGCGCCA
TGGGGCGCCTGGGCTACCCCGAGGGGCGCACCAGGTGGGGACCGGCGCCA
TGGGGCGCCTGGGCTACCCCGAGGGGCACACCAGGTGGGGACCGGCGCCA
TGGGGCGCCTGGGCTACCCCGAGGGGCGCACCAGGTGGGGACCGGCGCCA
TGGGGCGCCTGGGCTACCCCGAGGGGCGCACCAGGTGGGGACCGGCGCCA
TGGGGCGCCTGGGCTACCCCGAGGGGCGCACCAGGTGGGGACCGGCGCCA
TGGGGCGCCTGGGCTACCCCGAGGGGCGCACCAGGTGGGGACCGGCGCCA
TGGGGAGCCGGAGCCACCCCGAGGGATGCACCAGGGGGCGGCCAGC-GCA
TGGGGAGCCGGAGCCACCCCGAGGGATGCACCAGGGGGCGGCCAGC-GCA
TGGGGAGCCGGAGCCACCCCGAGGGATGCACCTGGGGACGGCCAGC-GCA
TGGGGAGCCGGAGCCACCCCGAGGGATGCACCTGGGGACGGCCAGC-GCA
TGGGGAGCCTGAGCGACCGCGAGGGATGCGCCAGATGGGGACCGGCACAA
TGGGGAGCCTGAGCGACCGCGAGGGATGCGCCAGATGGGGACCGGCACAA
TGGGGAGCCTGAGCGACCGCGAGGGATGCGCCAGATGGGGACCGGCACAA
TGGGGAGCCTGAGCGACCGCGAGGGATGCGCCAGATGGGGACCGGCACAA
TGGGGAGCCTGAGCGACCGCGAGGGATGCGCCAGATGGGGACCGGCACAA
TGGGGCGCCTGAGCGACCGCGAGGAATGCACTGGGTAGCGACCCGC--GA
TGGGGCGCCTGAGCGACCGCGCGGAACGCACTGGGTAGCGACCCGC--GA
TGGGGCGCCTGAGCGACCGCGCGGAACGCACTGGGTAGCGACCCGC--GA
TGGGGCGCCTGAGCGACCGCGCGGGATGCACTGGGTGGCGACCCGC--GA
TGGGGCGCCTGAGCGACCGCGCGGAACGCACTGGGTAGCGACCCGC--GA
CGTGACGCCTGAGCCAACGTGAGGGATGCACCAGGTGGCGACCGGTAT-A
CGTGACGCCTGAGCCAACGTGAGGGATGCACCAGGTGGCGACCGGTAT-A
CTGGGCGCTGGAGCCACCCCGCGGAATGCACCCGGTGGCGACCAGC----
--GGGCGCTGGAGCCACCCCGCGGAATGCACCCGGTGGCGACCAGC----
--GGGCGCTGGAGCCACCCCGCGGAATGCACCCGGTGGCGACCGGC----
TGTGGAGCCTAAGCCACCCCGAGGGGTGCACCGAGTGGTGACCGGCACGG
TGGGGAGCCGGAGCCACCCCGAGGAATGCACCCAGGGGCGGCCAGCGC-A
TGGTGAGCCTAAGCCACCGCGAGGGATGCACCAGGTGGCTACCGGCATGA
CGTATAGTCTGAGCCACCCCAAGGGATGCACCAGGTGACGACCGGCATGA
CGTATAGTCTGAGCCACCCCAAGGGATGCACCAGGTGACGACCGGCATGA
TGTATAGTCTGAGCCACCCCAAGGGATGCACCAGGTGACGACCGGCATGA
TGGGGCGCCTGAGCGACCGCGCGGAGTGCACTGGGTGGTGACGAGCACAA
TGGGGCGCCTGAGCGACCGCGCGGAGTGCACTGGGTGGTGACGAGCACAA
CTGGCAGCC--CGCGACCGCCAGGAATGCACCAGGTGGCGACCTGCATGA
TGGGGCGCCTGAGCGACCGCGCGGAACGCACTGGGTAGCGACCCGC--GA
TGGGGCGCCTGAGCGACCGCGCGGAATGCACTGGGTGGCGACCCGC--GA
TGGGGAC---CGGCGACGCCGAGGGACGCAGCAGGTGGCGACCGGCGTCG
TGGGGAC---CGGCGACGCCGAGGGACGCAGCAGGTGGCGACCGGCGTCG
TGGGGAC---CGGCGACGCCGAGGGACGCAGCAGGTGGCGACCGGCGTCG
--------------------------------------------------
TGGGGAGCCGGCGCCACCGCGAGCAATGCACCAGGTGGCGCCCGGCAT-A
TGGGGAGCCTGCGCCGCGGCGAGGGATGCGCCCGGTGGCGGCCGG-----
TGGGGAGCCTGCGCCGCGGCGAGGGATGCGCCCGGTGGCGGCCGG-----
TGGGGAGCCTGCGCCGCGGCGAGGGATGCGCCCGGTGGCGGCCGG-----
TGGGGAGCCTGCGCCGCGGCGAGGGATGCGCCCGGTGGCGGCCGG-----
TGGGGAGCCTGCGCCGCGGCGAGGGATGCGCCCGGTGGCGGCCGG-----
TGGGGAGCCTGCGCCGCGGCGAGGGATGCGCCCGGTGGCGGCCGG-----
TGGGGAGCCTGCGCCGCGGCGAGGGATGCGCCCGGTGGCGGCCGG-----
TGGGGAGCCTGCGCCGCGGCGAGGGATGCGCCCGGTGGCGGCCGG-----
--------------------------------AGGTGGGTGCCG------
--------------------------------AGGTGGGTGCCG------
TGGGGAGCCTGAG-------------------------------------
CGGGGGG-------------------------------------------
TGGGGACCCTGCGCCACCCTGAGAGATGCACCACGTGGCAACCGGCTCGA
TGGGGACCCTGCGCCACCCTGAGAGATGCACCACGTGGCAACCGGCTCGA
TGGGGAGCCGGCGCCACCGAGAGCAATGCACCAGGTGGCGCCCGGCAT-A
TGGGGAGCCGGCGCCACCGCGAGCAATGCACCAGGTGGCGCCCGGCAT-A
TGGGGAGCCGGCGCCACCACGAGCAATGCACCAGGTGGCGCCCGGCAT-A
TGGGGAGCCGGCGCCACCGCGAGCAATGCACCAGGTGGCGCCCGGCAT-A
TGGGGAGCCTGCGCCGCGGCGAGGGATGCGCCCGGTGGCGGCCGGC-GGA
TGGGGAGCCTGCGCCGCGGCGAGGGATGCGCCCGGTGGCGGCCGGC-GGA
TGGGGAGCCTGCGCCACGGCGAGGGATGCACCAGGTGGCGACTGGCATGA
TGGGGAGCCTGCGCCACGGCGAGGGATGCACCAGGTGGCGACTGGCATGA
TGGGGAGCCTGCGCCACGGCGAGGGATGCACCAGGTGGCGACTGGCATGA
TGGGGAGCCTGAG-------------------------------------
TGGGGAGCCTGAC-------------------------------------
TGGGGAGCCTGAG-------------------------------------
TGGGGAGCCTGAC-------------------------------------
TGGAGAGCCTGAGTCACTTTGAGGAATAAACCACATGGCGGCCGGCATGA
TAAGAAGCCCGCGCCACCCCGAGGGACGCATCAGGTGGCGACCGGCACCA
GGGAGAGCTTGAGCCACCCCCAGGGATGCACC-GGTGGCGGCCGGCATGA
TGGGAAGCCTGAGCCGCCCCGACGGATTCACCACATGGAGGCCAGCATGA
GGGGGGGCCTGAAGCACTGC--------------GTGGCCACTGGCAT-A
GGGGGGGCCTGAAGCACTGC--------------GTGGCCACTGGCAT-A
GGGGGAGCCACCGCCACCCCGAGGAATGCGCCCGGTGGCGCCCGGCAT-A
GGGGGAGCCACCGCCACCCCGAGGAATGCGCCCGGTGGCGCCCGGCAT-A
GGGGGAGCCGGCGCCACCACGAGGAATGCACTAGGTGGCGCCCGGCAT-A
GGGGGAGCCGGCGCCACCACGAGGAATGCACCCGGTGGCGCCCGGCAT-A
TGGGGAGCCTGCGCCGCGGCGAGGGATGCGCCCGGTGGCGGCCGGC-GGA
CGGGGTGCTTGAGTCACGGCGAGCGATGCACCGGGTGGCGACCGGCACAA
CGGGGTGCTTGAGTCACGGCGAGCGATGCACCGGGTGGCGACCGGCACAA
GGGAGAGCTTGAGCCACCCCCAGGGATGCACC-GGTGGCGGCCGGCATGA
GGGAGAGCTTGAGCCACCCCCAGGGATGCACC-GGTGGCGGCCGGCATGA
GGGAGAGCTTGAGCCACCCCGAGGGATGCACC-GGTGGCGGCTGGCATGA
GGGAGAGCTTGAGCCACCCCGAGGGATGCACC-GGTGGCGGCTGGCATGA
GGGAGAGCTTGAGCCACCCCGAGGGATGCACC-GGTGGCGGCTGGCATGA
TGGGAAGCCTGAGCCGCCCCGAGCGGTGCACCAGGTGGCGCCCGGCATGA
TGGGAAGCCTGAGCCGCCCCGAGCGGTGCACCAGGTGGCGCCCGGCATGA
TGGGAAGCCTGAGCCGCCCCGAGCGGTGCACCAGGTGGCGCCCGGCATGA
TGGGGAGCTCGAGCCGCCCCGAGGGTTGCAGCAGGTGGCGACTGGCATGA
TGGGGAGCCTGAGCCACCCCGAGGGACGCACC-GGTGGCGACTGGCAT-A
TGGGGAGCCTGAGCCACCCCGAGGGACGCACC-GGTGGCGACTGGCAT-A
TGGGGAGCCTGGGCCACC--GGGGGATGCGCCAGGTGGCGACGGGCATAA
TGGGGAGCCTGGGCCACC--GGGGGATGCACCAGGTGGCGACGGGCATAA
TGGGAAGCGTGAGTCCC---AAGCCGTGCGCCAGGTGGCGGCCGGCACAA
TGCGGAGCCGGCGTCACCCCGAGGGATGCGCCAGGTGGCGGCCGGCAAG-
TGCGGAGCCGGCGTCACCCCGAGGGATGCGCCAGGTGGCGGCCGGCAAG-
TGGAGAGGCTGAGCCACGGTGAGGGATACACC-GGTGGTGATGAGCATGA
TGGGAAGCCTCAGCCGCCCCGAGAGATGCACCA--TCGGTATCGGCAGGA
TGAGGAGCCTGAGTCGCCCCGAAGGCTGCACCAGGTGGCGGCCGGGAGGC
TGAGGAGCCTGAGTCGCCCCGAAGGCTGCACCAGGTGGCGGCCGGGAGGC
TGAGGAGCCTGAGTCGCCCCGAAGGCTGCACCAGGTGGCGGCCGGGAGGC
TGGGGAGGCTGAGCCACCTCGAGGGATGCGGCCGGTGGCGGACAGCATG-
TAGGGAGGCTGAGCCACCTCGAGGGATGCGGCCGGTGGCGGACAGCATG-
CTGGCTGCCTGTGCCTCCCCGAGGGATGCACCAGATGGTGTCCC------
TGAGGAATCTGAGCCACCGCGAGGGATGCACCAGGTGGCGACCGACATAG
TGGGGAACCGGAGCCACCCCGAAGGATGTGCCAGGCGGCGCCCTG-----
TGGTGGGCCTGGGCCACTGGGAAAGATGCGGCCGGTGACGA-CGGC----
TGGTGGGCCTGGGCCACTGGGAAAGATGCGGCCGGTGACGA-CAGC----
TGGGGAGCCTGAGCCACC--GAGAGACGCACCAGGTCTCGACCTGCTTGA
TAGGGAGTCCGAGCTACCCCGAGGGATGCGCCAGGTGGTGGCGGCCAT-A
TGCGGAGGCGGGGTCACCCCGAGGGATGCACCAGGTGGCGGCCGGCATGG
TGCGGAGGCGGGGTCACCCCGAGGGATGCACCAGGTGGCGGCCGGCATGG
TGCGGAGCCGGCGTCACCCCGAGGGATGCGCCAGGTGGCGGCCGGCAAG-
--------------------------------------------------
TTGGGAGCCTGCGCCACCC-GAAGGATGCAGTAC----------------
--------------------------------------------------
GGGGGAGCCTGAGCCGCCCCGAGGGATGCATCAGGTGGCGACC-------
GGGGGAGCCTGAGCCGCCCCGAGGGATGCATCAGGTGGCGACC-------
GGGGGAGCCTGAGCCGCCCCGAGGGATGCATCAGGTGGCGACC-------
TGGGGAGCCTATGCCACCCCGAGAGACACACC-GGTGGCCCCCAGCACAA
TGGAGAGCCTGGGCCACCACGAGATATGCACAAGGTAGCGACCGGCACGT
TGGGGAGCCTGAGCCAGCCTGAGGATTGCACC-GGCGGTGACCGGCATGA
TGGGGAGCCTGAGCCAGCCTGAGGATTGCACC-GGCGGTGACCGGCATGA
TGGGGAGCCTGAGCCAGCCTGAGGATTGCACC-GGCGGTGACCGGCATGA
TGGGTATTCCAAGTTACCCCGCG--AGGCACCAGGTGGCGACGGGCACCA
TGAGGAATCTGAGCCACCGCGAGGGATGCACCAGGTGGCGACGGGCATAA
TGAGGAATCTGAGCCACCGCGAGGGATGCACCAGGTGGCGACGGGCATAA
CGGGGAGCCTGAGCCGCGCCGAGGGACGCGCC-GGTGGGAGCCGGCACGG
TGGGGAGCCTGGGCCCCCGGGAGGGATGCACCAGGTGGCGACCGGCACGA
CGTGGGGCCTGGGCCACCCC--GGGGTGCGCCAGGTGGCTGCCGGCATG-
CGTGGGGCCTGGGCCACCCC--GGGGTGCGCCAGGTGGCTGCCGGCATG-
TGGGAAGCGTGAGTCCC----AAGCGTGCGCCAGGTGGCGGCCGGCACAA
--------------------------------------------------
--------------------------------------------------
--------------------------------------------------
TGGGGAGCCTGAGCTACCCCGAGGGATGCACCAGGTGGCCATCGACAT-A
TGGGGAGCCTGAGCTACCCCGAGGGATGCACCAGGTGGCCATCGGCAT-A
--------------------------------------------------
TGCGGAGCCGGCGTCACCCCGAGGGATGCGCCAGGTGGCGGCCGGCA-GA
TGCGGAGCCGGCGTCACCCCGAGGGATGCGCCAGGTGGCGGCCTGCA-GA
--------------------------------------------GC----
TGGGGAGCCTGAGTGACCGCGAGAGGTGCGCCAGGTGGCGACCGGCATGG
TGGGGAGCCTGAGTGACCGCGAGAGGTGCGCCAGGTGGCGACCGGCATGG
TGGGGAGCCTGAGTGACCGCGAGAGGTGCGCCAGGTGGCGACCGGCATGG
CGGGGAGGCTGAGCCACCCTGAGGGATGCGCCCGGTGGCGACGGGCATGA
CGGGGAGGCTGAGCCACCCTGAGGGATGCGCCCGGTGGCGACGGGCATGA
--------------------------------------------------
CG------------------------------------------------
TGGGGTGCCCG-GCCACCC-------------------------------
TGGGGCGCCCG-GCCACCC-------------------------------
TGGGGAGCCTGAGCCACCCCGCGGGATGCACGAGGCGGCGACCGGCAT-A
TGGGGAGCCTGAGCCACCCCGCGGGATGCACGAGGCGGCGACCGGCAT-A
TGGGGAGCCTGAGCCACCCCGCGGGATGCACGAGGCGGCGACCGGCAT-A
TGTGGAGCCTGAGCCACCGCGAGCGGTGCACCACGCGGTGAGC-------
TGTGGAGCCTGAGCCACCGCGAGCGGTGCACCACGCGGTGAGC-------
CGGGGAGGCTGAGCCACCCTGAGGGATGCGCCCGGTGGCGACGGGCATGA
CGGGGAGGCTGAGCCACCCTGAGGGATGCGCCCGGTGGCGACGGGCATGA
TGGGGAGCCTGAG-CACCACGAGGGGTGCACCAGGTGGCCACGGGCACGA
TGGGCAGCCCGAGCCACCCCGATGGGCGCACACGGTGGCGACCGGCATGA
TGGGCAGCCCGAGCCACCCCGATGGGCGCACACGGTGGCGACCGGCATGA
TGGGCAGCCCGAGCCACCCCGATGGGCGCACACGGTGGCGACCGGCATGA
TGGGCAGCCCGAGCCACCCCGATGGGCGCACACGGTGGCGACCGGCATGA
TGGGCAGCCCGAGCCACCCCGATGGGCGCACACGGTGGCGACCGGCATGA
CG-AGAGCCTAAGCCACTCCGAGGAATGCGTCAGGTG-------------
CG-AGAGCCTAAGCCACTCCGAGGAATGCGTCAGGTG-------------
TGGGGAGCCTGCGCCGCCCCGAGAGGCGTGTCAGGTAGCCAGTTGCACGA
TGGGGAGCCTGCGCCGCCCCGAGAGGCGTGTCAGGTAGCCAGTTGCACGA
TG------------------------------------------------
TGGAGAGCCTGAGCCACCGCGAACGACACACCAGG---------------
TGGGGCGCCCGGTCCATCCCGAGGGAGGCGCCAG----------------
TGGGGCGCCCGGTCCATCCCGAGGGAGGCACCAG----------------
TGGGGCGCCCGGTCCATCCCGAGGGAGGCACCAG----------------
TGGGGCGCCCGGTCCATCCCGAGGGAGGCACCAG----------------
TGGGGCGCCCGGTCCATCCCGAGGGAGGCGCCAG----------------
TGGGGCGCCCGGTCCATCCCGAGGGAGGCGCCAG----------------
TG-GGGGTCCGGGACCCCGCGCGGGATGCACCAGGTGGCCACCGGCATGA
TG-GGGGTCCGGGACCCCGCGCGGGATGCACCAGGTGGCCACCGGCATGA
TGGGGACCCCGAGCCACACCGAGGGATGCACCACGTAGCGACTGGCACAA
CGGGGAGGCTGAGCCACCCTGAGGGATGCGCCCGGTGGCGACGGGCATGA
CGGGGAGGCTGAGCCACCCTGAGGGATGCGCCCGGTGGCGACGGGCATGA
TGGGGCGGCTGATCAATCGGGAGTGGTGCAGC-GGTAGGGACCGGCATGA
TGGGGCGGCTGATCAATCGGGAGTGGTGCAGC-GGTAGGGACCGGCATGA
TGGGGCGGCTGATCAATCGGGAGTGGTGCAGC-GGTAGGGACCGGCATGA
TGGGGCGGCTGATCAATCGGGAGTGGTGCAGC-GGTAGGGACCGGCATGA
TGGGGCGGCTGATTAACCCCGTGG-GTGCACCAGGTGGC--TGGGCATGA
TGGGGAGCCTGCGCCACGCCGAGGAATGCACG-GGTGGCGACCGGCACGA
TGGGGAGCCTGCGCCACGCCGAGGAATGCACG-GGTGGCGACCGGCACGA
TGGGGAGTCTGAGCAACCCCGAGG-GTG-ACGCGGTGGCGATCGGCAT-A
TGGAAAGCTTGGGCAACCTC--GGGATGCATC-GGTGGCGGTCAGCATGG
TGGAAAGCCTGGGCAACCTC--GGGATGCATC-GGTGGCGGTCAGCATGG
TGGGGAGCCTGAACCGCCCTGAGGGAAGCACC-GGTGGCGACCGGCACAA
TGGGGGCCCTGCG-------------------------------------
TGGGGAGCCCGAGCCCCTCCGAGGAATGCATCACGTGGCGACGGGCATGG
TGGGGAACGTGTGCCGCCCCAAGG-ATGCAGCATGTAGCGACCGGCACAA
TGGGGCGCCTGAGCCACCCCGAGGGATGCACCAGGTGGCCGCCGGCATAA
TGGGGCGCCTGAGCCACCCCGAGGGATGCACCAGGTGGCCGCCGGCATAA
AGTGGAGCCTGTGCCACCCCGAGGGATGCACCGGATGGCGGCCTGCAT-A
AGTGGAGCCTGTGCCACCCCGAGGGATGCACCGGATGGCGGCCTGCAT-A
AGTGGAGCCTGTGCCACCCCGAGGGATGCACCGGATGGCGGCCTGCAT-A
TGGGGAGCCTGCGCCACC--GAAGGATGCACCGGGTGGCGAGCTTCAGGG
TG-AGAGGCTGACCAACC--GAGGGATGCACGAGGTGGTAATTGGCA-GA
TGGGGAGCCTAAGCCACCCC--GGGTGGCACCAGGT--------------
TGGGCAGCCTGGGTCACCCCTAGGGGTGCACCCGGTGGCGACTGGCTTGA
TGGGGAGCCCGAGCCCCTCCGAGGAATGCATCACGTGGCGACGGGCATGG
TGGGGAGCCCGAGCCCCTCCGAGGGATGCATCACGTGGCGACGGGCATGG
TGGGGAGCCCGAGCCCCTCCGAGGAATGCATCACGTGGCGACGGGCATGG
TGGGGAGCCCGAGCCCCTCCGAGGGATGCATCACGTGGCGACGGGCATGG
TGGGGAGCCCGAGCCCCTCCGAGGGATGCATCACGTGGCGACGGGCATGG
TGGGGAGCCCGAGCCCCTCCGAGGGATGCATCACGTGGCGACGGGCATGG
TGGGGAGCCTGAGCCGCCCCGAGGGATGCACGAGGTGGCAGCCGGCATAG
TGGGGAGCCTGAGCCACCTCGAGGGAGGCTCGAGGTGGCGACCGGCATGA
------------------------------------GGCGACTGGCATAA
TGGGGCGCCTGAGCCACGCCGAGGGATGCGCCGGGTGGCTGCCGGCAT-A
TGGGGCGCCTGAGCCACGCCGAGGGATGCGCCGGGTGGCTGCCGGCAT-A
TGCGGATCGCCCGCCCCCCCAAGGGA---------TGGTGATCGTCATGA
TGGGGAGCCTGAGCCACCCTGAGAAATGCGAGACGCGGCGACCGGCATGA
TGGGCAGCCTGGGTCACCCCTAGGGGTGCACCCGGTGGCGACTGGCTTGA
TGGGCAGCCTGGGTCACCCCTAGGGGTGCACCCGGTGGCGACTGGCTTGA
TGGGCAGCCTGGGTCACCCCTAGGGGTGCACCCGGTGGCGACTGGCTTGA
TGGGCAGCCTGGGTCACCCCTAGGGGTGCACCCGGTGGCGACTGGCTTGA
TGGGGAGCCTGAGCCGCCCCGAGGGATGCACGAGGTGGCAGCCGGCAT-A
TGGGGAGCCTGAGCCGCCCCGAGGGATGCACGAGGTGGCAGCCGGCAT-A
TGGGGAGCCTGAGCCGCCCCGAGGGATGCACGAGGTGGCAGCCGGCAT-A
TGGGGAGCCTGAGCCGCCCCGAGGGATGCACGAGGTGGCAGCCGGCAT-A
TGGGGAGCCTGAGCCGCCCCGAGGGATGCACGAGGTGGCAGCCGGCAT-A
TGGGGCGCCTGAGCCACCCCGAGGGATGTGCCAGGTGGCGACCGGCATGA
TGGAACGTCGGGGCCACCCCGAGGGATGCGCCAGGTGGCGACCGGGATGA
TGGAACGTCGGGGCCACCCCGAGGGATGCGCCAGGTGGCGACCGGGATGA
TGGGGCGCCTGAGCCACGCCGAGGGATGCGCCGGGTGGCTGTCGGCAT-A
TGGGGCGCCTGAGCCACGCCGAGGGATGCGCCGGGTGGCTGTCGGCAT-A
TGGGGCGCCTGAGCCACGCCGAGGGATGCGCCGGGTGGCTGCCAGCAT-A
TGGGGCGCCTGAGCCACGCCGAGGGATGCGCCGGGTGGCTGCCGGCAT-A
TGGGGCGCCTGAGCCACGCCGAGGGATGCGCCGGGTGGCTGCCGGCAT-A
TGGGGCGCCTGAGCCACGCCGAGGGATGCGCCGGGTGGCTGCCGGCAT-A
GGGGGAGCCCGAGCCATCCCGAGGGATGCACCA-ATGGCGAGCGGCAT-A
GGGGGAGCCCGAGCCATCCCGAGGGATGCACCA-ATGGCGAGCGGCAT-A
GGGGGAGCCCGAGCCATCCCGAGGGATGCACCA-ATGGCGAGCGGCAT-A
TGGGCAGTCTGCGCTATTCCGATGGAGGCACCATGTCGCGACGGGCATGA
CTGGGAGCCTGAGCCACCCTGAGGGATGCACCACGTGGCAACCAGCATGG
CTGGGAGCCTGAGCCACCCTGAGGGATGCACCACGTGGCAACCAGCATGG
TGGGGAGCCTGAGCTGCCGTGAGGGATGCACGAGGTGGCAGCCGGCAT-A
TGGGGAGCCTGAGCTGCCGTGAGGGATGCACGAGGTGGCAGCCGGCAT-A
TGGGGCGCCTGAGCCACGCTGAGGGATGCGCCGGGTGGCTGTCGGCAT-A
TGGGGGGCCTGAGCCACCCAGAGGGACTCACCACCTGACGACTGGCACGG
--------------------------------------------------
--------------------------------------------------
TGGGGAGCCTGAGCCACCTCGAGCGATGCATCAGGTGGTGACCTGC-TCA
TGTGGAGCCTTGGCTCCCCTGTGGGGTGCACC-GGTGGCGAGCTGC----
--------------------------------------------------
GG-----------------------ATGCCCC-GGAGGCAACCGGGATGG
GGGTGAGCGTGAGCTACCGAGAGGGATGTACCAGGTGGCGCCCGACATGA
--------------------------------------------------
--------------------------------------------------
--------------------------------------------------
--------------------------------------------------
GCGGGAGCCTGAGCCACTCCGCGGGATGCGCTAGG-GGCGACGGGCATAA
GCGGGAGCCTGAGCCACTCCGCGGGATGCGCTAGG-GGCGACGGGCATAA
TGGGGGGCCTGGGGCACCGCGAGGGGTGCACGGGGTGGTGGCCTGCGTGA
TGGGGGGCCTGGGGCACCGCGAGGGGTGCACGGGGTGGTGGCCTGCGTGA
TGGGGGGCCTGGGGCACCGCGAGGGGTGCACGAGGTGGTGGCCTGCGTGA
TGGGGGGCCTGGGGCACCGCGAGGGGTGCACGAGGTGGTGGCCTGCGTGA
TGGGGGGCCTGGGGCACCGCGAGGGGTGCACGAGGTGGTGGCCTGCGTGA
TGGGGGGCCTGGGGCACCGCGAGGGGTGCACGAGGTGGTGGCCTGCGTGA
TGGCAAACCTGGGCCACCCCGAGGGATGCACCAGGTGGTGGCCGGCGT-A
TGTGGAGCCTGAGTCACGTC-TGGGCTGCCCCAGGTGGCGACCGGCGTGA
TGTGGAGCCTGAGTCACGTC-TGGGCTGCCCCAGGTGGCGACCGGCGTGA
GAGGGCGCCTGAGCTACCCTGATGGATGCGCTAGATGGCGGCCCGCATGG
TGGGGAGCCTGAGCCACCTCGAGCGATGCATCAGGTGGTGACCTGCATGA
TGGGGAGCCTGAGCCACCTCGAGCGATGCATCAGGTGGTGACCTGCATGA
TGGGGAGCCGGAGCCCTCTCGAGGGACGCACCAGGTGGCGGCGTGCATGG
TGGGGAGCTGCTGC------------------------------------
TGGGGAGCTGCTGC------------------------------------
--GGGTGCTTGAGGCGCCTTGAGCGATGCAGGAGGTGGCAACCGGCATGA
--GGGTGCTTGAGGCGCCTTGAGCGATGCAGGAGGTGGCAACCGGCATGA
--GGGTGCTTGAGGCGCCTTGAGCGATGCAGGAGGTGGCAACCGGCATGA
GG------------------------------------------------
GG------------------------------------------------
TGTGGGGCCTGAGTCACCCCGAGGGATGCACCAGTTGGCGGCCTGCAGGA
TGTGGACTCAGAATCATCCCGAGGGATGCACGAGGTGGCGACTAGAAAAA
TGGGGAGCCTGAGCCACCCCGAGGGGTGCGCCAGCGGGCCACTGGCATGA
--AGGTGCCTGCGCTGCCTGGAGGCAACCAGCCG---GAGGGCCGCATCA
--------------------------------------------------
TGGAGAGCCTGAGACGCCGC-AGGGGTACACCATGTGGCTGACGGCACAA
TGGGGGGCCTGGGGCACCGCGAGGGGTGCACGAGGTGGTGGCCTGCGTGA
TGGGGGGCCTGGGGCACCGCGAGGGGTGCACGAGGTGGTGGCCTGCGTGA
TGGGGGGCCTGAGCCACCCAGAGGGACTCACCACCTGACGACTGGCACGG
TGGGGAGCCTGAGTCACCCCGAGGGATGCAGCAGGTGGCGACCGGCATGA
TGGGGAGCCTGAGTCACCCCGAGGGATGCAGCAGGTGGCGACCGGCATGA
TGGGGAGCCTGAGTCACCCCGAGGGATGCAGCAGGTGGCGACCGGCATGA
TGTGGAGCCTGAGTCACGTCCTGGGCTGCCCCAGGTGGCGACCGGCGTGA
TGGGGAGCCTGAGCCACCTCGAGCGATGCATCAGGTGGTGACCTGCATAA
TGGGGAGCCGGAGCCCTCTCGAGGGACGCACCAGGTGGCGGCGTGCATGG
TGGGCAGCCTGAGATGCTCCGAGGAATGCAC-AGGTCGCGATCGGCCTAA
--------------------------------------------------
--------------------------------------------------
--------------------------------------------------
--------------------------------------------------
--------------------------------------------------
TGGGCAGCCTGGGCTACCCCGAGGGAAGCCTTACGTGTCGACCGGCATGA
CGGGCAGGCCCCACGACCCCGAGGGGTGCCCCACATGCCGACCGGCAT-A
CGGGCAGGCCCCACGACCCCGAGGGGTGCCCCACATGCCGACCGGCAT-A
CGGGGAGGCCGAACCAGCC-GAGGGCCGCATCATGTGGTGACCTGCTC-A
CGGGGAGGCCGAACCAGCC-GAGGGCCGCATCATGTGGTGACCTGCTC-A
TGGGGAGCCTGAGCCACCCCGAGGGGTGCGCCAGCGGGCCGCTGGCATGA
TGCAGAGCCTGAGCCATCTCGAGGAGTGCACCAGGTGGTGGCCGGCGTGA
TGGGGAGCCTGAGGCACGCTGAGGG-------------------------
--------------------------------------------------
TGGGCAACCTGTGCCACCCCGAGGGACGCACCACGTGGCGACTGTCATGG
TGGGCAACCTGTGCCACCCCGAGGGATGCACCACGTGGCGACTGTCATGG
TGGGCAACCTGTGCCACCCCGAGGGACGCACCACGTGGCGACTGTCATGG
TAGATAGCCTGAGCTACCCCTACGTATGCAC-ACGTGGCGACCGGTACAA
TGGGCAGCCTGGGTCACTCCGAGGGATGCACGAGGTGGCGACCGGCATGA
TG--CGGCCTGCG-------GATGGCTGCTGC--GAGGCGACCGGCAG-A
TGCCGAGTCTGCACCAGCCCGAGAGGTGCCCCAGGTGGCGACCGGCAT-A
TG------------------------------------------------
--------------------------------------------------
TGGGGAGCCTGAGTCACTCCGAGGGATGCACGAGGTGGCGGCTGGCATGA
TGGGGAGCCTGAGCCACCCCGAGGGATGCACCAGGTGGCGACCGGCACAA
TGTGCAGCGT----------GAGGGATACACTAGGCGGCAACCGGCGTAA
TGGGTAACCTGCGCCGCCGCGAGGGATGCACCAGATGGCGACTGGCATGA
TGGGTAACCTGCGCCGCCGCGAGGGATGCACCAGATGGCGACTGGCATGA
TGGGTAACCTGCGCCGCCGCGAGGGATGCACCAGATGGCGACTGGCATGA
TGGGTAACCTGCGCCGCCGCGAGGGATGCACCAGATGGCGACTGGCATGA
TGGGTAACCTGCGCCGCCGCGAGGGATGCACCAGATGGCGACTGGCATGA
TGGGCAGCCTGGGTCACTCCGAGGGATGCACGAGGTGGCAACCGGCATGA
TGAGGAACCTGAGTCACCCCGATGGGTGCACCAGGTGGCGACGAGCATGA
TG-------------------CGGGATGCACCGGGTGGCGAACGGCA-GA
TG------------------------------------------------
CGGGGAATCTGAGCCGCTCCGAGGGACGCACCAGCTAGCGAC--GTAACA
CGGGGAATCTGAGCCGCTCCGAGGGACGCACCAGCTAGCGAC--GTAACA
AGGAGAGCCTGAGCCGCCCCGAGGGACGCACCAGTGGGCGACTGGCATCA
AGGAGAGCCTGAGCCGCCCCGAGGGACGCACCAGTGGGCGACTGGCATCA
AGGAGAGCCTGAGCCGCCCCGAGGGACGCACCAGTGGGCGACTGGCATCA
TGGGGAGCCTGAGGCACCC-------------------------------
TGGGGAGCCTGAGGCACCC-------------------------------
TGGGGAGCCTGAGCCACCGCGAGGGATGCAGCACGTGGCGGCCGGCATAC
TGGGGAGCCTGAGCCACCGCGAGGGATGCAGCACGTGGCGGCCGGCATAC
TGGGGAGCCTGAGCCACCGCGAGGGATGCAGCACGTGGCGGCCGGCATAC
TGGGTAACCTGCGCCGCCGCGAGGGATGCACCAGATGGCGACTGGCATGA
--GGGCGCCTGAGCCGCCCCGAGAGACGCACCACGTGGCG--CGACCTGA
--GGGCGCCTGAGCCGCCCCGAGAGACGCACCACGTGGCG--CGACCTGA
GGTGGAGCCTAAATCACACCAAGCAAAGCACCAGGTGGCGGCCTGCGTGA
TATGGAGCCTGAGCCACCCCGAGGGACGCATCAGGTGCCTGCCGGGATGA
TAGGGATCCTGAGCCACACCGAGAGATGCCCCATATAGTGGCCTGTA-GA
TA---CGCCTGCGTGAT---AAGAGCTGCTGC--GAGGCGACCGGCA-GA
TGTGGCGCCTGCGTCACCCCGAGGGATGCACCAGCTGGCGACCGGCGAAA
TGTGGCGCCTGCGTCACCCCGAGGGATGCACCAGCTGGCGACCGGCGAAA
TGTGGCGCCTGCGTCACCCCGAGGGATGCACCAGCTGGCGACCGGCGAAA
TGAGGGCCCTGAGCCACCCCGAGGGGGGCACCCCGCGGCCACTGGCATGA
TGAGGGCCCTGAGCCACCCCGAGGGGTGCACCCCGCGGCCACTGGCATGA
TGAGGGCCCTGAGCCACCCCGAGGGGGGCACCCCGCGGCCACTGGCATGA
--------------------------------------------------
--------------------------------------------------
--------------------------------------------------
--------------------------------------------------
TGTGGAGCCTGAGCCATGTCGAGCGATGCAGAAGGTGGTGTCCGGCATGA
GG--GAGACTGAGCGACGCCGAGGAATGCACT-GGTGGCGGCTGGCATGA
TG------------------CGGGGATGCACCGGGTGGCGAACGGCAAGT
TGGGGGCCCTGAGCCACACCGAGGGACGCCGCGGGTGGCGACCGGCATGA
TGGGGGCCCTGAGCCACACCGAGGGACGCCGCGGGTGGCGACCGGCATGA
TGGGGGCCCTGAGCCACACCGAGGGACGCCGCGGGTGGCGACCGGCATGA
TGGGGGCCCTGAGCCACACCGAGGGACGCCGCGGGTGGCGACCGGCATGA
TGGGGGCCCTGAGCCACACCGAGGGACGCCGCGGGTGGCGACCGGCATGA
CGGGGAGGCTGAGCCATGTCGAGGGATGCACCAGGTGGCGACCGGCGTGG
CGGGGAGGCTGAGCTATGCCGAGGGATGCACCAGGTGGCGACCGGCGTGG
CGGGGAGGCTGAGCCATGTCGAGGGATGCACCAGGTGGCGACCGGCGTGG
CGGGGAGGCTGAGCCATGTCGAGGGATGCACCAGGTGGCGACCGGCGTGG
TGGAGAGCCTGCGCCACCGCGGGGGATGCACTACGTGGTAGCCAGTGCAG
GGGGTCG-------------------------------------------
GGGGTCG-------------------------------------------
GGGGTCG-------------------------------------------
GG------------------------------------------------
GG------------------------------------------------
--------------------------------------------------
CG-GGTGCCCGCGCCACCCTGAGGAATGCGGCTGCTGACGACCTGCA---
TGGGGAGCCTGCGCCACGGC------------------------------
TGGGGAAGCTGAGTGACCCCAAGGGATGCATCGGGTGACAACCTTCG---
--------------------------------------------------
TCGGGAGCCGGAGCCACCTCGAGGCATGCATCGGGTGGCGACCGGCATGA
TGGGGAGCCTGAGCTGCCCCGAGAGGTGCGCCAGGTGGCGACCAGCAC-A
TGGGGAGCCTGAGCTGCCCCGAGAGGTGCGCCAGATGGCGACCAGCAC-A
TGGGGAGCCTGAGCTGCCCCGAGAGGTGCGCCAGATGGCGACCAGCAC-A
TGAGGAGCTTGGGCCACCGC--GGGATGCATCGGGCGGTGGCCGGCATGA
TCGGGAGCCGGAGCCACCTCGAGGCATGCATCGGGTGGCGACCGGCATGA
TGGGGAGCGTGGGCCACCCCGAGGGAGGCACCAGGTGGCGGCCGGCGTGA
TGGGGAGCGCGGGCCACCCCGAGGGAGGCACCAGGTGGCGGCCGGCGTGA
TGGGGAGCGCGGGCCACCCCGAGGGAGGCACCAGGTGGCGGCCGGCGTGA
----------------------------------------------ATGA
----------------------------------------------ATGA
TGTGGCACCGGAGTCACTCCGAGGGATGCACC-GGTGGCGACTGCTACGA
--------------------GAGGTATGCACCGGGTGGCGAGCGGCGCAA
--------------------GAGGTATGCACCGGGTGGCGAGCGGCGCAA
--------------------GAGGTATGCACCGGGTGGCGAGCGGCGCAA
--------------------GAGGTATGCACCGGGTGGCGAGCGGCGCAA
--------------------GAGGTATGCACCGGGTGGCGAGCGGCGCAA
--------------------GAGGTATGCACCGGGTGGCGAGCGGCGCAA
TGGGGA-CGGGTGGCGCCACGAGAAATGCGGCAGCTGGCGACCGCCATGA
TGGGAAGTCCGAGTCGCCCCGAGAGATGCACCAAGTGTCGGCC-------
TGGGGCGCCTGATTCACTCCAAGGGAGGCACCCGGCGGCGAC--------
TGGGGAGCCCGCGCCACTACGAG--ATGCACCAGGTGGCGACGGGCTTAC
TGGGGAGCCCGCGCCACTACGAG--ATGCACCAGGTGGCGACGGGCTTAC
--------------------GAGGGGTGCACCAGGTGGCGGAAGGCACCA
--------------------GAGGGGTGCACCAGGTGGCGGAAGGCACCA
TG------------------------------------------------
TG------------------------------------------------
TG------------------------------------------------
TGGGAAGCCTGAGTCCCCCCGAGGGCGGCACCCGGCGGCGACTG------
TGGAGAGTCCGAGCCGCCCCAAGGGACGCACCAGGTGGCAGCCG------
TGGAGAGGCTGAGGCGCCCCAAGGGACACACCAGGCGACGAGC-------
TGGGGAGCCT-AGCCACCCCGAGGGGTGCGGGGGATAGCGACCGGCAGGA
GTAGGAGTCTGAGCCATC--GTGGCGAGCAGGATATGGGGA---------
TG-GGTGCCTGAGTCATCCCGAGGGATGCATC-GGTGGCGACCGGCAGAA
TGGGGAGTCTGAGCCATCCCAAGGGATGCACTAGGTGTCGACCGACACAA
TGGGGAGCCTGAGCCCCCC-GAGAGGTGCGCCAGATGGCGACCAGCAC-A
TGGGGAGCCTGAGCCCCCC-GAGAGGTGCGCCAGGTGGCGACCAGCAC-A
TGGGCAGCCTGAGTCACCCCGAGGGGTGGCGAACAGCGTGATTGA-----
TGGGGGGCCTGAGTCACCGCGAGGGATGCACCAGGTGGCGGCCGGCATGA
--------------------GAGGGGTGCACCAGGTGACGGAAGGCGCAA
--------------------GAGGGGTGCACCAGGTGACGGAAGGCGCAA
TGGGGAGCCTGAGCCACCCCGAGGGATGCACCAGGTGGCGACCGGCTCGA
TGGGGAGCCTGAGCCACGCCGAGGGATGCACGAGGTGGCGACCGGCATGG
TGGGGAGCCTGAGCCACGCCGAGGGATGCACGAGGTGGCGACCGGCATGG
TGGGGAGCCTGAGCCACGCCGAGGGATGCACGAGGTGGCGACCGGCATGG
TGGTTAGCCTGAGCCACCCCGAAGGCTGCGGCAGATGGCGACC--CATCG
TGGTTAGCCTGAGCCACCCCGAAGGCTGCGGCAGATGGCGACC--CATCG
TGGGGAGCCTGAGCCACCGCGGGGGATGCACCACGTGGCGACCGGCATGA
TGGGGAGCCTGAGCCACCGCGGGGGATGCACCACGTGGCGACCGGCATGA
TGGGGAGCCTGAGCCACCGCGGGGGATGCACCACGTGGCGACCGGCATGA
TGGGAAGCCTGAGCCACCCCGAGGGGCGCGGCTGGTGGCGACCTGCA-GA
TGGGAAGCCTGAGCCACCCCGAGGGGCGCGGCTGGTGGCGACCTGCA-GA
CGGGAAGCCTGAATCATCCCGAGGGATGCGCCCGGTGGCAACCTCCATGA
CTGGGAGCCTGAGCTGCTGCGAGGGATGCCCCAGGTGGTCGCCGGTAT-A

----------------------TGCGAGCCGGGTGGGTAGGGCTTGAGGC
----------------------------GTGGGTGGGTAGAGTCTGAGGC
TGGG----------------------------GTGGGTAGAGTTTGGGGC
---------------------------------TGGGCAGCATTTGGGCC
TGGGAGGGTGTTTAAAGCGACCCGAGGAGCGGGTGGTTGATGTTTGAGGC
TGGGAGCAGCTGTCAGGCAACGTTCGGAGCCGGTGGATAGAGTTTGAGGC
CGGGCACGGCTGTGAGGCGGCCTGCGAAGCGGGTGGACTGCGGTTAAGGC
CGGG-------------------------CGGGTATGTAGAGTTTGGGGC
--------------------CCTGCGAGGCGGGTGAGAAGAGTTGGAGGC
TGCGTGCGGCTGTGAGGCGACCTGCGACGCGGGTGGGTAGAGTGTGAGGC
TGTGCGCGGATGTGGGGCGCCCTGTGAAGCAGGCGGGCAGGGTGTGAGGC
TGG-AGCGGCTGCGGGGCGACCTGGGTAGCGGGCGCGTTGCCTTTGAGGC
TGGGAGCGAGTGTGAGGCGTCCAGCGGAGCGGGTGAGTAGCGTTTGGGGC
TGGGAGCGGCTGTGAGGCGGCCTGCAAGGCGGGCGGGTGGAGGTCGGGGC
TGGGAGCGGCTGTGAGGAGGCGTGCGGGGCGTGTGCGTAGAAGGTGACGC
TGGAGGCGTCTGGAAGGCG------------GGTGAGTAGCGCCTGAGGC
TGGGCGCCGCTGTGAGGCGGCCTGCTACGCGGGTGGGGAGTGTGT-AGA-
TGGAGGCGGCTGTGAGGTGG--TGCGTGACTGGTCGGGCGCGTTTGAGGC
TGGAGGCGGCTGTGAGGTGG--TGCGTGACTGGTCGGGCGCGTTTGAGGC
TGGAGGCGGCTGTGAGGTGG--TGCGTGACTGGTCGGGCGCGTTTGAGGC
TGGAGGCGGCTGTGAGGTGG--TGCGTGACTGGTCGCGAGAGTATGAGG-
TGGAGGCGGCTGTGAGGCG-------------GT----------------
--------------------------------------------------
--------------------------------------------------
--------------------------------------------------
TGGGAGCGAGTGTGAGGCGTCCAGCGGAGCGGGTGGGTAGCGTTTGGGGC
TGGGGGCGGCTGTGGGGCGGTC----------GTGG-GGGGGTTTGGGGC
TGGGGGCGGCTGTGGGGCGGTC----------GTGGGGGGGGTTTGGGGC
-------------ACGGCGACCTGCGGAGCGGGTGGGTAGAGTTTGAGGC
-------------ACGGCGACCTGCGGAGCGGGTGGGTAGAGTTTGAGGC
------------------------------GGGGAGGGGGAGATGCACCC
TGG-----------------------------GCGGGTGGAGTTCGAGGC
TGG-----------------------------GCGGGTGGAGTTCGAGGC
TG-----------------ACCAGCGGGGCGGGTGTTTTGAGTGTGGGGC
--------------------------AGGCCGGTGAGGAGAGCTCGAGGC
--------------------------AGGCCGGTGAGGAGAGCTCGAGGC
--------------------------------GTGGTCGGAGTGCGAGGC
--------------------------------------------------
--------------------------------------------------
--------------------------------------------------
--------------------------------------------------
-----------------------------TGGGTGAGGAGTGTTTGAGGC
-----------------------------TGGGTGAGGAGTGTTTGAGGC
-----------------------------TGGGTGAGGAGTGTTTGAGGC
-----------------------------TGGGTGAGGAGTGTTTGAGGC
------------CGAGGCGACCTGCGAGACGGGTGGGGAG--GTTGAGGC
------------CGAGGCGACCTGCGAGACGGGTGGGGAG--GTTGAGGC
------------CGAGGCGACCTGCGAGACGGGT--GTGGAGGTTGAGGC
TGGGAGCGACTGTGAGGCGACCTGCGAAGCGGGCGGGCATAGCTT-AGGC
TGGGAGCGACTGTGAGGCGACCTGCGAAGCGGGCGGGCATAGCTT-AGGC
TGG-AGCGGCTGTGAGGCGACCTGCGCAGCAA--GGGGGGAGCTTCAGGC
TGG-AGCGGCTGTGAGGCGACCTGCGCAGCAAGGGGGGGGAACTTCAGGC
TGG-AGCGGCTGTGAGGCGACCTGCGCAGCAA--GGAGGGAGCTTCAGGC
-----------------------------CGGGTGGG--GAGGTTGAGGC
TGGG-------------------------TGGGTGGGCGAAGTTCGAGGC
----------------------AGCGGAGCGGGTGCGTAGAGCTGGGGGC
-----------------------------CGGGTGGG--GAGGTTGAGGC
TGGGAGCGGCTGTGGAGCGACCTGCGAGGCGGGTGGGTAGAGTATGCTGC
TGGGAGCGGCTGTGGAGCGACCTGCGAGGCGGGTGGGTAGAGTGTGCTGC
TGGGAGCGGCTGTGAGGCGACCTGCTACGCGGGTGGGCAGGGCTCGAGGC
--------------------------------------------------
-------------------GCCTGCGAGGCGGGTGGGCAGAGGTTGAGGC
-------------------GCCTGCGAGGCGGGTGGGCAGAGGTTGAGGC
-------------------GCCTGCGAGGCGGGTGGGCAGAGGTTGAGGC
-------------------GCCTGCGAGGCGGGTGGGCAGAGGTTGAGGC
-------------------GCCTGCGAGGCGGGTGGGCAGAGGTTGAGGC
TGGGAGCGGCTGTGAGGCGACCTGCTACGCGGGTGGGCAGGGCTCGAGGC
TGGGAGCGGCTGTGAGGCGACCTGTTACGCGGGTGAGCAGGGCTCGAGGC
TGGGAGCGGCTGTGAGGCGACCTGCTACGCGGGTGGGCAGGGCTCGAGGC
-------------------GCCTGCGAGGCGGGTGGGCAGAGGTTGAGGC
-------------------ATCTGCAAGGCGGGTGGGTAGAGTTTGAGAA
----------------------TACGAGGGAGGTCTGCAGATTTGGGGGC
----------------------CGCGAGGCGGGTCGGTGGCGTTTGAGGC
TGGGAGCGGCTGAGAGGCGCCCTGCTGAGCGGGTGGGCGGCGTTTGAGGC
TGGGAGAGGCTTTGGGGCGACCTTCGAAGCGGATGGTTTGAGTATGGGTC
TATGAGCTGCTGTGA----------------------TTTGGTTCGAGCC
----------------------TGCGAGGTGGGTGGGTAGCGTGTGAGGC
----------------------TGCGAGGTGGGTGGGTAGCGTGTGAGGC
----------------------TGCGAGGTGGGTGGGTAGCGTGTGAGGC
----------------------TGCGAGGTGGGTGGGTAGCGTGTGAGGC
----------------------TGCGAGGTGGGTGGGTAGCGTGTGAGGC
----------------------TGCGAGGTGGGTGGGTAGCGTGTGAGGC
----------------------------GTGGGCGGGCGGCGTTTGAGGC
CGGGGGCTGGTGCGAGGCGACGTGCGGGGCGGGTGGGTGGAGCTTGCGGC
--------------------------------------------------
TGGGAGC-------------------------------------------
CGGGGGCTGGTGCGAGGCGACGTGCGGGGCGGGTGGGTGGAGCTTGCGGC
TGGGAG--------------------------------------------
TGGGAG--------------------------------------------
TGGG------------------TGCGAAGCGCGTGGGTCCAGTATGAGGC
--------------------------------------------------
TGGCAGCGGCTGTGGGGCGACCTGCGGAGCGGGTGGCTCGAGTGTGAGGC
TGGCAGCGGCTGTGGGGCGACCTGCGGAGCGGGTGGCTCGAGTGTGAGGC
TGGGAGTGGCTGGGAGGCAGCCTGCGGCGTGCGTGGGCGGGGTGTGGGGC
--------------------------------------------------
--------------------------------------------------
--------------------------------------------------
--------------------------------------------------
TGGGAGCGGCTGCGAGGCGCCCTGCTGCGCGGGTGGGCGGTGTTTGGGGC
TGGGAGCGGCTGCGAGGCGCCCTGCTGCGCGGGTGGGCGGTGTTTGGGGC
TGGGAGCGGCTGCGAGGCGCCCTGCTGCGCGGGTGGGCGGTGTTTGGGGC
TGGGAGCGGCTGCGAGGCGCCCTGCTGCGCGGGTGGGCGGTGTTTGGGGC
--------------------------------------------------
--------------------------------------------------
TGGGTGCTTCTGTGAGGTAACCTG-AAGGCGGGCGGGTAGCGTGTGAAGC
TGGGCGCGGCTGTAAAGCGACCTGCGAAGCGGGCGGGTAGGGTTTGAGGA
TGGGCGCGGCTGTAAAGCGACCTGCGAAGCGGGCGGGTAGGGTTTGAGGA
TGGGAGCGGCTGTGAGGTGGCCTGCGAGGCGGGTGGGCATGGGTTGAAGC
TGGGAGCGGCTGTGAGGTGGCCTGCGAGGCGGGTGGGCATGGGTTGAGGC
--------------------------------------------------
--------------------------------------------------
TGGGAGCGGCTGTGTGG---------------GTGAGGAGAGCTTGAGGC
TGGGAGCGGCTGTGTGG--------------GGTGAGGAGAGCTTGAGGC
TGGGAGCGGCTGTGTGG--------------GGTGAGGAGAGCTTGAGGC
TGGGAGCGGCTGTGTGG--------------GGTGAGGAGAGCTTGAGGC
TGGGAGCGGCTGTGTGG----------GGTGGGTGAGGAGAGCTTGAGGC
TGGGAGCGGCTGTGTGG----------GGTGGGTGAGGAGAGCTTGAGGC
TGGGAGCGGCTGTGTGG----------GGTGGGTGAGGAGAGCTTGAGGC
--------------------------------------------------
---------------------------------------GCGTTTAAGGC
--------------------------------------------------
CG----------------------------GGGCGGGTAGAGTTTGAGGT
TGCGAGCGGCTGCGAGGCGACCTGCAAGACAGGTCGGTAGAGTTCGAGGC
GGGCAGGCACTGTGAGAC-------------GGTGGGCAGCGTGCGAAGC
GGGCAGGCACTGTGAGAC-------------GGTGGGCAGCGTGCGAAGC
TGGGTGCGGCGGTGAGGCGACCTGCAGCGCGTGTGGGTAGAGCCTGAGGC
TGGGTGCGGCGGTGAGGCGACCTGCAGCGCGTGTGGGTAGAGCCTGAGGC
TGGAAGTGGCTGTGAGGCAGCCTGCAAGAAGGGTGAGTAGAGCTTAAGGC
------------------------------GGGTGGGCAGCGTTTGAGGC
TGGGTGCGGCGGTGAGGCGACCTGCGCAGCGTGTGGGTAGAGCCTGAGGC
TGGGTGCGGCGGTGAGGCGACCTGCGCAGCGTGTGGGTAGAGCCTGAGGC
TGGGTGCGGCGGTGAGGCGACCTGCGCAGCGTGTGGGTAGAGCCTGAGGC
TGGGGGCGGCTGTGAGGCGACCTGCGGAGCAGGAGGGTAGAGTGTGAGGC
TGGGGGCGGCTGTGAGGCGACCTGCGGAGCAGGAGGGTAGAGTGTGAGGC
TGCGAGCGGCTGCGAGGCGACCTGCAAGACAGGTCGGTAGAGTTCGAGGC
TGGGGGCGGCTGTGAGGCGACCTGCGGAGCAGGAGGGTAGAGTATGAGGC
TGGGGGCGGCTGTGAGGCGACCTGCGGAGCAGGAGGGTAGAGTGTGAGGC
TGGGGGCGGCTGTGAGGCGACCTGCGGAGCAGGAGGGTAGAGTGTGAGGC
TGGGGGCGGCTGTGAGGCGACCTGCGGAGCAGGAGGGTAGAGTGTGAGGC
TGGGGGCGGCTGTGAGGCGACCTGCGGAGCAGGAGGGTAGAGTGTGAGGC
TGGGGGCGGCTGTGAGGCGACCTGCGGAGCAGGAGGGTAGAGTGTGAGGC
TGGGGGCGGCTGTGAGGCGACCTGCGGAGCAGGAGGGTAGAGTGTGAGGC
--------------------------------------------------
--------------------------------------------------
--------------------------------------------------
--------------------------------------------------
----------------------------------AGATAGAG-AGGAGGG
TGGAAGCGGCTGCGAGGCAACCTGTAAGGCGGGTGGGTGGAGTTCGAGTC
TGGAAGCGGCTGCGAGGCAACCTGTAAGGCGGGTGGGTGGAGTTCGAGTC
--------------------------------GTGGGTAGAGTTCGAGGC
------------------------CGGGGCGGGTGGGCAGCG--------
------------------------CGGGGCGGGTGGGCAGCG--------
------------------------CGGGGCGGGTGGGCAGCG--------
------------------------CGGGGCGGGTGGGCAGCG--------
------------------------CGGGGCGGGTGGGCAGCG--------
GGGTAGCTGCTGCGAGGCGACCTGCGGGGCGGGTGGCCCGTGCTTGAGGC
CGGTAGCTGCTGCGAGGCGACCTGCGGGGCGGGTGGCCCGTGCTTGAGGC
CGGGAGCGGCTGTGAGGCGACATGCGGGGCGGATTTGTAGAGTCTGGGGC
CGGGAGCGGCTGTGAGGCGACATGCGGGGCGGATTTGTAGAGTCTGGGGC
CGGGAGCGGCTGTGAGGCGACATGCGGGGCGGATTTGTAGAGTCTGGGGC
CGGGAGCGGCTGTGAGGCGACATGCGGGGCGGATTTGTAGAGTCTGGGGC
CGGGAGCGGCTGTGAGGCGACATGCGGGGCGGATTTGTAGAGTCTGGGGC
TGTGCGCTGCTGTGGGGCGACCTGCGGTGCGGATGGGTGG-G-------C
----------------------TG--AAGCAGGTAGGGAGAGCTTGAGGT
---------------------------GGCGGATGGGTAGAGTGTGAGGC
---------------------------GGCGGATGGGTAGAGTGTGAGGC
-----------------------GCGAGGCGGGTGGGCAGAGTTTGAGGC
-----------------------GCGAGGCGGGTGGGCAGAGTTTGAGGC
---------------------------------TGGGTAGAGTGTGAGGC
---------------------------------TGGGTAGAGTGTGAGGC
--------------------------------------------------
--------------------------------------------------
--------------------------------------------------
TGTGCGCTGCTGTGGGGCAGCCTGCGTGGCGGGTGGGCAGAGTGCGAGG-
TGTGCGCTGCTGTGGGGCAGCCTGCGTGGCGGGTGGGCAGAGTGCGAGG-
TGTGCGCTGCTGTGGGGCAGCCTGCGTGGCGGGTGGGCAGAGTGCGAGG-
TGTGCGCTGCTGTGGGGCAGCCTGCGTGGCGGGTGGGCAGAGTGCGAGG-
TGTGCGCTGCTGTGGGGCAGCCTGCGTGGCGGGTGGGCAGAGTGCGAGG-
TGTGCGCTGCTGTGGGGCAGCCTGCGTGGCGGGTGGGCAGAGTGCGAGG-
TGTGCGCTGCTGTGGGGCAGCCTGCGTGGCGGGTGGGCAGAGTGCGAGG-
TGTGAGCTGCTGTGGGGCGACCTGCGAAGAGGGTGTGCGGAGTTCGAGGT
--------------------------------------------------
-------------------------------GGTGGGCGGAGCTCGAGTC
-------------------------------GGTGGGCGGAGCTCGAGTC
-------------------------------GGTGGGCGGAGCTCGAGTC
TGGGAGCGGCTGTGAGGCGACCTGCGGCGCGGGTGGGCACCCTTTGGGGT
AGG-----------------------------GTGCGTCGAGTTTGAGAC
AGG-----------------------------GTGCGTCGAGTTTGAGAC
TGGGAGCGGCTGTGAGGGGACCTGCGCGGCGG--GTGGGCAGAGTTGGAC
TTGGAGCGCGTGAGGGGCAATCCGCAGGACGGGTGGGTAGATGGTGGGAC
AG-----------------------------GGTGCGTCGAGTTTGAGAC
AG-----------------------------GGTGCGTCGAGTTTGAGAC
AG-----------------------------GGTGCGTCGAGTTTGAGAC
AG-----------------------------GGTGCGTCGAGCTTGAGAC
AG-----------------------------GGTGCGTCGAGTTTGAGAC
TGGGAGCTGCTGTGCGGCGACCCGCGACGCAGGTGGGTTGAGTTTGAGGC
CGGG----------------------------ATGGGCGGAGTTGTAGGC
TGGGAGCGGCTGTGAGGCAACCTGCGGAGCGGGCGGGTAGCGCTGGAGGC
TGGGAGCGGCTGTGAGGCAACCTGCGGAGCGGGCGGGTAGCGCTGGAGGC
TGGGAGCGGCTGTGAGGCAACCTGCGGAGCGGGCGGGTAGCGCTGGAGGC
TGGGAGCGGCTGTGAGGCAACCTGCGGAGCGGGCGGGTAGCGCTGGAGGC
TGGGAGCGGCTGTGAGGAGGCGTGCGGGGCGTGTGCGTAGAAGGTGACGC
--------------------------------------------------
TGGGAGCGGCTGTGAGG-CAC------GGGGGGAGGGTAGAACTTGAGGC
TGGGAGCGCCTGTGCGGCGACCTGCGGAGTGGATAGATGGAGTTT-AGTC
TGGGAGCGCCTGTGCGGCGACCTGCGGAGTGGATAGATGGAGTTT-AGTC
TGGTAGCTGCTGTGAGGCAACCTGCGGGGCGGGTGGGTGGGGTTTGAGGC
TGGTAGCTGCTGTGAGGCAACCTGCGGGGCGGGTGGGTGGGGTTTGAGGC
TGGTAGCTGCTGTGAGGCAACCTGCGGGGCGGGTGGGTGGGGTTTGAGGC
TGGTAGCTGCTGTGAGGCAACCTGCGGGGCGGGTGGGTGGGGTTTGAGGC
TGGTAGCTGCTGTGAGGCAACCTGCGGGGCGGGTGGGTGGGGTTTGAGGC
TGGTAGCTGCTGTGAGGCAACCTGCGGGGCGGGTGGGTGGGGTTTGAGGC
TGGTAGCTGCTGTGAGGCAACCTGCGGGGCGGGTGGGTGGGGTTCGAGGC
TGGTAGCTGCTGTGAGGCAACCTGCGGGGCGGGTGGGTGGGGTTCGAGGC
TGGGAGCGGCTGTGAGGAGGCGTGCGGGGCGTGTGCGTAGAAGGTGACGC
TGGGAGCGGCTGTGAGGAGGCGTGCGGGGCGTGTGCGTAGAAGGTGACGC
TGGGGGCGGCTGCGAGGCGACCCGCGAGGCGGGTGCGTAGCGTGTGAGGC
TGGGGGCGGCTGCGAGGCGACACGCGAGGCGGGTGCGTAGCGTGTGAGGC
TGGGGGCGGCTGCGAGGCGACACGCGAGGCGGGTGCGTAGCGTGTGAGGC
TGGGGGCGGCTGCGAGGCGACCCGCGAGGCGGGTGCGTAGCGTGTGAGGC
TGGGGGCGGCTGCGAGGCGACACGCGAGGCGGGTGCGTAGCGTGTGAGGC
TGGGGGCGGCTGCGAGGCGACACGCGAGGCGGGTGCGTAGCGTGTGAGGC
TGGAGGCGGCTGCGAGGCGACACGCGAGGCGGGTGCGTAGCGTGTGAGGC
-------------------------GAGCCGGGTGGACAGAGTTTGATGC
-------------------------GAGCCGGGTGGACAGAGTTTGATGC
--------------------------------------------------
-------------------------GAGCCGGGTGGACAGAGTTTGATGC
CGTGAGCGGCTGTGGGGCGACCTGTGGAGCGGGTGGGTAGAGTTCGAGGC
CGTGAGCGGCTGTGGGGCGACCTGTGGAGCGGGTGGGTAGAGTTCGAGGC
TGGGAGCGTCTGTGCGGCGACCTGCGAGGCGGGTCGACAGAGCTTGGGGC
TGGGAGCGTCTGTGCGGCGACCTGCGAGGCGGGTCGACAGAGCTTGGGGC
TGGGAGCGTCTGTGCGGCGACCTGCGAGGCGGGTCGACAGAGCTTGGGGC
--------------------------------------------------
TGGGAGCGTCTGTGCGGCGACCTGCGAGGCGGGTCGACAGAGCTTGGGGC
--------------------------------------------------
----------------------------GCGGGTGGGTAGAGCTTGAGGC
----------------------------GCGGGTGGGTAGAGCTTGAGGC
----------------------------GCGGGTGGGTAGAGCTTGAGGC
----------------------------GCGGGTGGGTAGAGCTTGAGGC
TGCAAGCGGCTGTGAGGAGACGTGCGAAGCGGGTGAGTAGAGTCTGGTGC
TGCAAGCGGCTGTGAGGAGACGTGCGAAGCGGGTGAGTAGAGTCTGGTGC
TGCAAGCGGCTGTGAGGCGACGTGCGAAGCGGGTGAGTAGAGTCTGGTGC
TGGGAGCGTCTGTGCGGCGACCTGCGAGGCGGGTCGACAGAGCTTGGGGC
TGCAAGCGGCTGTGATGCG------GGGGCGGGTGGGTAGAGTCTGAAGC
CGGGGGCGGCTGTGAGGCGGCCTGCGAGGTGGGTGGGTAGAGTCCGATGC
CGGGGGCGGCTGTGAGGCGGCCTGCGAGGTGGGTGGGTGGAGTCCGATGC
CGGGGGCGGCTGTGAGGCGGCCTGCGAGGTGGGTGGGTGGAGTCCGATGC
CGGGGGCGGCTGTGAGGCGGCCTGCGAGGTGGGTGGGTAGAGTCCGATGC
CGGGGGCGGCTGTGAGGCGGCCTGCGAGGTGGGTGGGTAGAGTCCGATGC
CGGGGGCTGGTGCGAGGTGACGTGCGGGGCGGGTGGGTGGAGCTTGCGGC
CGGGGGCTGGTGCGAGGTGACGTGCGGGGCGGGTGGGTGGAGCTTGCGGC
CGGGGGCTGGTGCGAGGTGACGTGCGGGGCGGGTGGGTGGAGCTTGCGGC
CGGGGGCTGGTGCGAGGCGACGTGCGGGGCGGGTGGGTGGAGCTTGCGGC
CGGGGGCTGGTGCGAGGCGACGTGCGGGGCGGGTGGGTGGAGCTTGCGGC
TGGGAGCGGGTGTGGGGCGAC-TGCGGAGAGGGTGAGTAAAGTCGGAGGC
CGGGGGCGGCTGTGAGGCGGCCTGCGAGGTGGGTGGGTAGAGTCCGATGC
TGGGAGCGGGTGTGGGGCGAC-GGCGGAGCGGGTGGGGAGGGCTCGAGGC
TGGGAGCGGGTGTGGGGCGAC-GGCGGAGCGGGTGGGGAGGGCTCGAGGC
TGGGAGCGGGTGTGGGGCGAC-GGCGGAGCGGGTGGGGAGGGCTCGAGGC
TGGGAGCGGGTGTGGGGCGAC-GGCGGAGCGGGTGGGGAGGGCTCGAGGC
TGGGAGCGGGTGTGGGGCGAC-GGCGGAGCGGGTGGGGAGGGCTCGAGGC
TGGGAGCGGGTGTGGGGCGAC-GGCGGAGCGGGTGGGGAGGGCTCGAGGC
TGGGAGCGGGTGTGGGGCGAC-GGCGGAGCGGGTGGGGAGGGCTCGAGGC
TGGGAGCGGGTGTGGGGCGAC-GGCGGAGCGGGTGGGGAGGGCTCGAGGC
TGGGAGCGGGTGTGGGGCGAC-TGCGGAGCGGGTGGGGAGGGCTCGAGGC
CGGGGGCGGCTGTGAGGCGGCCTGCGAGGTGGGTGGGTAGAGTCCGATGC
CGGGGGCGGCTGTGAGGCGGCCTGCGAGGTGGGTGGGTAGAGTCCGATGC
--------------------------------------------------
TGGGAGCCGCTGTGAGGCGACCTGCGAGGCAGGTGGGTAGAGCTCGAGGC
TGGGAGCCGCTGTGAGGCGACCTGCGAGGCAGGTGGGTAGAGCTCGAGGC
--------------------------------------------------
--------------------------------------------------
--------------AGGCGACCTGCGCCGCGGGTTGGCGGTGTCTGAGAC
--------------AGGCGACCTGCGCCGCGGGTTGGCGGAGTTTGAGCT
--------------AGGCGACCTGCGCCGCGGGTTGGCGGAGTTTGAGCT
--------------AGGCGACCTGCGCCGCGGGTTGGCGGAGTTTGAGCT
--------------AGGCGACCTGCGCCGCGGGTTGGCGGAGTTTGAGCT
--------------AGGCGACCTGCGCCGCGGGTTGGCGGAGTTTGAGCT
TGGGAGCCGCTGTGAGGCAACCTGCGAAGCGGGTGTGTACAGTTCGTGGT
--------------------------------------------------
TGGGAGCCGCTGTGAGGCGACCTGCGAGGCAGGTGGGTAGAGCTCGAGGC
TGGGAGCCGCTGTGAGGCGACCTGCGAGGCAGGTGGGTAGAGCTCGAGGC
------------------------------------------TTTGAGGC
------------------------------------------TTTGAGGC
------------------------------------------TTTGAGGC
--------------AGGCGACCTGCGCCGCGGGTTGGCGGAGTTTGAGCT
-GGGGGGGGCTGTGCGGCGACCTGCGGGGCAGACAGGTAGAGTGTGAGGC
-GGGGGGGGCTGTGCGGCGACCTGCGGGGCAGACAGGTAGAGTGTGAGGC
TGGGAGCGTCTGCGGGGCGGCCTGCGAGGCGGGTTGTGGGGGATGGGGGC
TGGGAGCGTCTGCGGGGCGGCCTGCGAGGCGGGTTGTGTGTGTGGGGGGG
TGGGAGCGTCTGCGGGGCGGCCTGCGAGGCGGGTTGTGGGGGATGGGGGC
TGGGAGCGTCTGCGGGGCGGCCTGCGAGGCGGGTTGTGTGTGTGGGGGGG
--------------------------------GTGGTTAGTGTTTCGGTC
--------------------------------GTGGTTAGTGTTTTGGTC
--------------------------------GTGGTTAGTGTTTTGGTC
--------------------------------GTGGTTAGTGTTTTGGTC
-----------GGGACGAGGCGAGCGAGGCGGGTGCGTAGAGCTGGGGGC
TGGAAGCGCCTGTGAGGCGATCTGCGAGGCAGGTGGGTAGAGTATGAGGC
TGGAAGCGCCTGTGAGGCGATCTGCGAGGCAGGTGGGTAGAGTATGAGGC
CGGGAGCGACTGTGAGGCAACCTGCTGTGTGGGTGGGCAGAGTTTGAGGC
CGGGAGCGACTGTGAGGCAACCTGCTGTGTGGGTGGGCAGAGTTTGAGAC
CGGGAGCGACTGTGAGGCAACCTGCTGTGTGGGTGGGCAGAGTTTGAGGC
CGGGAGCGACTGTGAGGCAACCTGCTGTGTGGGTGGGCAGAGTTTGAGGC
CGGGAGCGACTGTGAGGCAACCTGCTGTGTGGGTGGGCAGAGTTTGAGGC
CGGGAGCGACTGTGAGGCAACCTGCTGTGTGGGTGGGCAGAGTTTGAGGC
----------------------------------AGGCGGAGTTGGAGAC
----------------------------------AGGCGGAGTTGGAGAC
----------------------------------AGGCGGAGTTGGAGAC
----------------------------------AGGCGGAGTTGGAGAC
----------------------------------AGGCGGAGTTGGAGAC
TGCGAT-GGCTGTGAGGCGACCTGCGGAGAGGGT-GGAGGAGCTTGAGGC
TGGGAT-GGCTGTGAGGCGACCTGCGGAGAGGGT-GGAGGAGCTTGAGGC
TGCGAT-GGCTGTGAGGCGACCTGCGGAGAGGGT-GGAGGAGCTTGAGGC
TGCGAT-GGCTGTGAGGCGACCTGCGGAGAGGGT-GGAGGAGCTTGAGGC
TGCGAT-GGCTGTGAGGCGACCTGCGGAGAGGGT-GGAGGAGCTTGAGGC
TGCGAT-GGCTGTGAGGCGACCTGCGGAGAGGGT-GGAGGAGCTTGAGGC
----------------------CGCGGAGCGGGTGGGTGGAGTCTGAGTC
----------------------CGCGGAGCGGGTGGGTGGAGTCTGAGTC
----------------------CGCGGAGCGGGTGGGTGGAGTCTGAGTC
----------------------CGCGGAGCGGGTGGGTGGAGTCTGAGTC
CAGGAGCAGCTGTGAGGCTGCCTGCGAAGAGGGTGGGTGCAGCTTGAGAC
TAGAAGCGGC------------TGCGGGGCGG----GTGCCGCTCGAA-C
TGGGTGCGACTGTGAGGCGACCGGCAAAGCGAGTAGTGGGAGTTTGAGTC
--------------------------------------------------
TGGCGGCGTC--AGAAA-GGCCTGCGGAGCGGGTCAGTCGAGTTGGAGTC
TGGGAGCGTCTGCGAGGCGACCTCGGGCGGGGGTGGGCCAAGCTTGAGGC
TGGGAGCGTCTGCGAGGCGACCTCGGGGGGGGGTGGGCCAAGCTTGAGGC
TG------------------------------GCGGGTAGAGTTTTGTGC
TG------------------------------GCGGGTAGAGTTTTGTGC
TG------------------------------GCGGGTAGAGTTTTGTGC
TGCGAGCGGCGGTGAGG---------------------------------
TGCGAGCGGCGGTGAGG---------------------------------
TGCGAGCGGCGGTGAGG---------------------------------
TGGGAGCGTCTGCGAGGCGACCTCGGGCGGGGGTGGGCCAAGCTTGAGGC
TGCGAGCGGCGGTGAGGCG-------------------------------
TGCGAGCGGCGGTGAGGCGAACTGCGAGGCGAGTGGGTCGAGTTCGAGGC
TGAGAGGGGCTGTGAGAAGACCTGCAAGGCAGGTCGGTAGAGCTTGAGGC
TTGGAGCGTCGGAAGGGAGACGTAAAAG----------------------
--------------------------------------------------
TGGGCGCGGCTGCGCGGCGACCCGCGGAGCGGGTGGGCGTGGGTGGGGGC
TGGGCGCGGCTGCGCGGCGACCCGCGGAGTGGGTGGGCGTGGGTGGGGGC
TGGGCGCGGCTGCGCGGCGACCCGCGGAGCGGGTGGGCGTGGGTGGGGGC
TGGGCGCGGCTGCGCGGCGACCCGCGGAGCGGGTGGGCGTGGGTGGGGGC
--------------------------------------------------
------------CGACGCCACCTGCGACGCGGGTGGGCGGAGTGTGAGGC
------------CGACGCCACCTGCGACGCGGGTGGGCGGAGTGTGAGGC
----------------GCCACCTGCGACGCGGGTCGGCGGAGCGTGAGGC
------------CGACGCCACCTGCGACGCGGGTCGGCGGAGTGTGAGGC
------------CGACGCCACCTGCGACGCGGGTCGGCGGAGTGTGAGGC
------------CGACGCCACCTGCGACGCGGGCGGGCGGAGTGTGAGGC
----------------GCCACCTGCGACGCGGGTCGGCGGAGTGTGAAGC
TGGGCGCGGCTGCGCGGCGACCCGCGGGGCGGGTGGGCGTGGGTGGGGGC
TGGGCGCGGCTGCGCGGCGACCCGCGGGGC---------GGGTTGTGGGC
TGGGCGCGGCTGCGCGGCGACCCGCGGAGCGGGTGGGCGTGGGTGGGGGC
TGGGCGCGGCTGCGCGGCGACCCGCGGAGCGGGTGGGCGTGGGTGGGGGC
TGGGAGCGGCTGCGAGGCGACCTGCGACGCGTGTGGGCAGAGAGTGGGGC
TGGGAGCGGCTGCGAGGCAGCCTGCGTAGCGGGTTACTAGAGTTCGAGTC
TTGGAGCGGCTGTGAGGCGACCTGCAAGGCGGGTCGGTGGAGCTTGAGGT
TTGGAGCGGCTGTGAGGCGACCTGCAAGGCGGGTCGGTGGAGCTTGAGGT
TGGGAGTGGCTGTGAGACAACCCGCAGAGAGGGTGGGTAGGGTTTGAGGC
TGGGAGCGGCGGTGAGGCGACCTGTAAGGCGGGTGGGTAGTGTGTGCAGC
TGGGCGCGGCTGCGCGGCGACCCGCGGAGCGGGTGGGTGGGG------GC
TGTGTGCGGCTGTGAGGCGACCTGCGGAGCCG------------------
TGTGTGCGGCTGTGAGGCGACCTGCGGAGCGGGTGGATGGGGTTTGAGGC
TGTGTGCGGCTGTGAGGCGACCTGCGGAGCGGGTGGATGGGGTTTGAGGC
--------------------------------------------------
--------------------------------------------------
TGTGAGCG------------------------------------------
TGGGAGCGGGTGTGGGGCGACGTGCGAAGCGGGTAGGCTGAGGCCGAGCC
TGGGAGCGGGTGTGGGGCGACGTGCGAAGCGGGTAGGCTGAGGCCGAGCC
TGGGAGCGGGTGTGGGGCGACGTGCGAAGCGGGTAGGCTGAGGCCGAGCC
--------------------------------------------------
--------------------------------------------------
--------------------------------------------------
TGA-AGCGGCCGTGAGGTGACCTGCGAAGCAGGTGGGCACAGGGCGAGTC
-------------GAAGCGACCCGCGGAGCGGGTCGGTGGCGTTTGAGGC
TGGGAGCGGCTGTGAGGCGACCTGCGAAACAGGTATGTAGCGTTCGAGGC
TGGAAGCCGCTGTGAGGCGGCCTGCGTATCTGGTGAGTAGAACTTGAGGC
TGGGAGCGGCTATGAAGCGACCTGCGCAGCGGCTGGGTATAGTTTAGGGC
------------------------CGGAGCGGGCGGGTAGAGTTGGAGGC
------------------------CGGAGCGGGCGGGTAGAGTTGGAGGC
------------------------CGGAGCGGGCGGGTAGAGTTGGAGGC
------------------------CGGAGCGGGCGGGTAGAGTTGGAGGC
TGGGAGCGGCTATGAAGCGACCTGCGCAGCGGCTGGGTATAGTTTAGGGC
TGGGAGCGGCTGTGAGGCCGCCTGCGGGGCGGGTGTGGAGAG--------
TAGGAGCAGCTCTGAAGCGACCTGCTACGCAGGCGGTTAGAATCTGAGAC
-------------------------------GGTGGGCTGAGTTTGAGGC
TGGCAGCTGCTGCGAAGCGATCTGCGGAGCGGGTGGGCAAGGTTGGAGGT
TGGCAGCTGCTGCGAAGCGATCTGCGGAGCGGGTGGGCAAGGTTGGAGGT
TGGGAG-AGCTGC-AGGCGA------------------------------
TGGGCGCGGCTGTGAGGCGACCTGCGCAGCGGGTGGGTAGAGTTTGGGGC
TGGTCGCGGCTGTGAGGCGACCTGCGCAGCGGGTGGGTAGAGTTTGGGGC
TGGTCGCGGCTGTGAGGCGACCTGCGCAGCGGGTGGGTAGAGTTTGGGGC
TGGGAGCGACTGTGAGGCGACCGCCTCAGCGGGTAGGTAGACTCTGAGGC
TGGGAGCGGCTGCGAGGCGACCGCCTCAGCGGGTAGGTAGACTCTGAGGC
TGGAAGTGACAGCGAGGCGA-----------GGTGGGCGGAGTTTGAGGC
TGGATGTGCCTGCGAGGCGACCTGCGAGGCGGGTGGGTAGAGTGTGAAAC
TGGATGTGCCTGCGAGGCGACCTGCGAGGCGGGTGGGTAGAGTGTGAAAC
TGGAAGCGGCTGCAAGGCG------------GGTGGGTAGAGTTTGATG-
TGGAAGCGGCTGCAAGGCG------------GGTGGGTAGAGTTTGATG-
TGGAAGCGGCTGTTAGGCG------------GGTGGGCAGAGCTGGAGGC
TGGCAGCCACTGCGAGGCGATCTGCAGAGTGGGTGGGCAGAGCTCAAGGC
TGGAAGCGGCTGTTAGGCG------------GGTGGGCAGAGCTGGAGGC
TGGGAGCGGCTGTGAGGCGACCTGCGGGGCGGGTGGGTAGCGTTCGGGGC
TGGGAGCGGCTGTGAGGCGACCTGCGGGGCGCGTGGGTAGCGTTCGGGGC
TGGGAGCGGCTGTGAGGCGACCTGCGGGGCGCGTGGGTAGCGTTCGGGGC
TGGGAGCGGCTGCGCGGCGACCTGCGGCGCGGGTGGGTAGAGTTTGAGGC
TGGGAGCGGCTGCGCGGCGACCTGCGGCGCGGGTGGGTAGAGTTTGAGGC
TGGGAGCGGCTGCGCGGCGACCTGCGGCGCGGGTGGGTAGAGTTTGAGGC
TGGGAGCGGCTGCGCGGCGACCTGCGGCGCGGGTGGGTAGAGTTTGAGGC
TGGGAGCGACTGTGATGCGACCTGGGGAGCGGGTGGGCGGGGTGCGAGGC
--------------------------------------------------
TGGGAGCGACTGTGATGCGACCTGGGGAGCGGGTGGGCGGGGTGCGAGGC
TGGGAGCGACTGTGATGCGACCTGGGGAGCGGGTGGGCGGGGTGCGAGGC
TGGGAGCGACTG--------------------------------------
TGGGAGCGACTGTGATGCGACCTGGGGAGCGGGTGGGCGGGGTGCGAGGC
TG--AGGGCCTGTGAGAGGGCG----------------------------
TAGGAGTGACTGCGAGGCGACCTGCGGAGCGTGTTCGCAGAGTATGCGGC
TGGGAGCGACTGTGATGCGACCTGGGGAGCGGGTGGGCGGGGTGCGAGGC
-------------------------------GGTGGGTAGGGCTTGAGGC
TGGGCGCTGCTGTGAGGCAACCTGCAAGGCAGGTGAGTAGGGTTTGATTC
TGGGCGCTGCTGTGAGGCAACCTGCAAGGCAGGTGAGTAGGGTTTGATTC
-GCG----------------------------GCGGGTAGAGTTTGAGCC
-------------------------------GGTGAGGAGAGTTTGAGGC
--------------------------------------------------
-------------------------------GGTGAGGAGAGTTTGAGGC
-------------------------------GGTGAGGAGAGTTTGAGGC
------------GGTGGCCACCTGCGAGCCGGGTGGGTAGGGCTTGAGGC
------------GGTGGCCACCTGCGAGCCGGGTGGGTAGGGCTTGAGGC
------------GGTGGCCACCTGCGAGCCGGGTGGGTAGGGCTTGAGGC
------------GGTGGCCACCTGCGAGCCGGGTGGGTAGGGCTTGAGGC
--------------------------------------------------
TGGTACCTGCTCTGAGGCGACCTACAAGGTGGGTGCGTAGGGTCTGTGGC
TGGA----------------------------GTGGGTGGAGCTCGAGGC
------------------------------GGGTGGGGCGGCTGTGGGGC
---------CTGTGGGGC-----------AGGGCGGGTAGATTGTGGGGC
---------CTGTGGGGC-----------AGGGCGGGTAGATTGTGGGGC
TGGGGGCGGCTGTGGGGC-----------AGGGCGGGTAGATTGTGGGGC
TGGGGGCGGCTGTGGGGC-----------AGGGCGGGTAGATTGTGGGGC
---------CTGTGGGGC-----------AGGGTGGGTAGATTGTGGGGC
TGGGAGCGGCTGTGAGGCGACTTGCTGGGCGGGT-GAAAGGATTTGATCT
CGGG----------------------------GTGGGTGTAGTTCGAGGC
CGGG----------------------------GTGGGTGTAGTTCGAGGC
TGGTGCCGGCTGTGAGGCGACCTGCGGGGCGGGCAAGTACATAATGAAGC
----ATCTGCTGTGAGGCGACCCGCGGAGCAGGTGGGTAAGGTTTGAAGC
----ATCTGCTGTGAGGCGACCCGCGGAGCAGGTGGGTAAGGTTTGAAGC
TGAGAGCGGGAGTGAGGCG--------GGTGGGTAGGTAGCGTTTGCGAC
TG--AGCG------------------------GCGGGTAGAGTTTGAGAC
TG--AGCG------------------------GCGGGTAGAGTTTGAGAC
TG--AGCG------------------------GCGGGTAGAGTTTGAGAC
TG--AGCG------------------------GCGGGTAGAGTTTGAGAC
--------------------------------GTGTGTGGAGTTTGAGGC
TG--AGGGCTGTGGGGGCGACCTGCGAGGCGGGTGGGTATAGTCTGGGGC
--------------------------------------------------
--------------------------------------------------
--------------------------------GTGTGTGGAGTTTGAGGC
--------------------------------GTGTGTGGAGTTTGAGGC
--------------------------------GTGTGTGGAGTTTGAGGC
TGGGAGCGGCTGTGAAGCCGCCTGCCACGCGGGTGGGCAGAGTGTGGGGC
TGGGAGCGGCTGTGAAGCCGCCTGCCACGCGGGTGGGCAGAGTGTGGGGC
TGGGAGCGACTGTGAAGCC-----------GGGTGGGTGGAGTTTGAGGC
TG--AGCGGCTGTGGGGCGACCTGCGAGGCGGGTGGGTATAGTCTGGGGC
TAAG----------------------------GTATGGAGTGTGTGTGTA
--------------------------------------------------
TGGGAGCGGCTGTGAGGCGACCTGCTACGCGGGTGGGTAGGGTGTGGGAC
TGGGAGCGGCTGTGAGGCGACCTGCTACGCGGGTGGGTAGGGTGTGGGAC
TGGGAGCGGCTGTGAGGCGACCTGCTACGCGGGTGGGTAGGGTGTGGGAC
TG--AGCGGCTGTGGGGCGACCTGCGAGGCGGGTGGGTATAGTCTGGGGC
TG--AGCGGCTGTGGGGCGACCTGCGAGGCGGGTGGGTATAGTCTGGGGC
TG--AGCGGCTGTGGGGCGACCTGCGAGGCGGGTGGGTATAGTCTGGGGC
TG--AGCGGCTGTGGGGCGACCTGCGAGGCGGGTGGGTATAGTCTGGGGC
TGG-AGCGGCTGCGGGGCGACCTGGGTAGCGGGCGCGTTGGCTTTGAGGC
TGG-AGCGGCTGCGGGGCGACCTGGGTAGCGGGCGCGTTGCCTTCGAGGC
TGG-AGCGGCTGCGGGGCGACCTGGGTAGCGGGCGCGTTGCCTTTGAGGC
TGG-AGCGGCTGCGGGGCGACCTGGGTAGCGGGCGCGTTGCCTTTGAGGC
TGG-AGCGGCTGCGGGGCGACCTGGGTAGCGGGCGCGTTGCCTTTGAGGC
TGCAAGCGGGCGTGGGGCGGCCTGAAGAGCAGGTCGCCAGTTTTTGCGGC
---------------------------------TGCGGTGTCTGTGAG-G
TGGGAGCGGCTGGGAGGCGCCT----------------------------
---------------------------------TGCGGTGTCTGTGAGTG
---------------------------------TGCGGTGTCTGTGAGTG
---------------------------------TGCGGTGTCTGTGAGTG
TGGGAGCG------------------------GTCGCGAG-CTGCGAGGC
TGCGAGCGGC------------TGCAAAGCGGGTGGGTAGCGTTTGGTGC
TGCGAGCGGC------------TGCAAAGCGGGTGGGTAGCGTTTGGTGC
----------------------TGTGAGGCGGGTGGGCAGTGTTTTGGTC
TGGGGGCAGCTGTGAGGCGCCCTCCGGAGCGGGTGGGAGGCGTTCGAGGC
TGGGAGCGGCTGTGACGCGAGCTGC--------------------GAGGC
TGGGAGCGGCTGTGACGCGAGCTGC--------------------GAGGC
CGTGAGCGGCTGCGAGGCGACCTGCGGTGCGGGTGGGTGGAGTATGAGGC
CGTGAGCGGCTGCGAGGCGACCTGCGGGGCGGGTTGTGAGAGTATGAGGC
CGTGAGCGGCTGCGAGGCGACCTGCGGTGCGGGTGGGTGGAGTATGAGGC
CGTGAGCGGCTGCGAGGCGACCTGCGGTGCGGGTTGTGAGAGTATGAGGC
CGTGAGCGGCTGCGAGGCGACCTGCGGGGCGGGTTGTGAGAGTATGAGGC
TGCGAGCGGCTGCAAAGCG-----------GGGTGGGTAGCGTTTGGTGC
TGCG----------------------------------------------
--------------------------------------------------
TGGGAGCGGCTGTGACGCAAACTGCGGAGCGGGTGCGTAGCGTTTGAGGC
TGAGAGTGGCTGTGAGGCGCCCTGCGGAGCGGGTGGGTAGAGTTTGGGTC
TGAGAGTGGCTGTGAGGCGCCCTGCGGAGCGGGTGGGCAGAGTTTGGGTC
TGAGAGTGGCTGTGAGGCGCCCTGCGGAGCGGGTGGGTAGAGTTTGGGTC
TGAGAGTGGCTGTGAGGCGCCCTGCGGAGCGGGTGGGTAGAGTTTGGGTC
TGAGAGTGGCTGTGAGGCGCCCTGCGGAGCGGGTGGGTAGAGTTTGGGTC
TGAGAGTGGCTGTGAGGCGCCCTGCGGAGCGGGTGGGTAGAGTTTGGGTC
TGCAAGCGGGCGTGGGGCGGCCTGAAGAGCAGGTCGCCAGTTTTTGCGGC
TGCAAGCGGGCGTGGGGCGGCCTGAAGAGCAGGTCGCCAGTTTTTGCGGC
TGCAAGCGGGCGTGGGGCGGCCTGAAGAGCAGGTCGCCAGTTTTTGCGGC
----------------------TGTGGAGCGGGTGGACAGTGTTTGGGTC
TGGAAGCGTTTGTGGTGCGTCGT-ACAGACGAATG---------------
TGGGCGCGGCCGCGAGGCAGTCTGGGGAGCGAGTGGGTAGCGTTTGACGC
--------------------------------------------------
--------------------------------------------------
--------------------------------------------------
TGGGTGCGGCTGTG-----------------------TAGAGCTTTGGAC
TGGGTGCGGCTGTG-----------------------TAGAGCTTTGGAC
TGGGTGCGGCTGTG-----------------------TAGAGCTTTGGAC
TGGGTGCGGCTGTG-----------------------TAGAGCTTTGGAC
TGGGTGCGGCTGTG-----------------------TAGAGCTTTGGAC
TGGGTGCGGCTGTG-----------------------TAGAGCTTTGGAC
TGGGTGCGGCTGTG-----------------------TAGAGCTTTGGAC
TGGGTGCGGCTGTG-----------------------TAGAGCTTTGGAC
TGGGTGCGGCTGTG-----------------------TAGAGCTTTGGAC
TGGGAGCGGCTGAGAGGCGACCTGCGGAACGGGGGGGCAGAACTTGATTC
--------------------------------------------------
--------------------------------------------------
GGGG-----------------------GGCG-GTGTGCCGACGTTGAGGC
-------------ACGGCGACCTGCGAGGCGGGTGGGTAGAGTTTGAGGC
CGGGAGCGGGTGTGGGGTGACCTGCACAGCGGGCGGGTGGAGTATGCGGC
CGGGAGCGGGTGTGGGGTGACCTGCACAGCGGGTGGGTGGAGTATGCGGC
CGGGAGCGGGTGTGGGGTGACCTGCACAGCGGGCGGGTGGAGTATGCGGC
CGGGAGCGGGTGTGGGGTGACCTGCACAGCGGGCGGGTGGAGTATGCGGC
CGGGAGCGGGTGTGGGGTGACCTGCACAGCGGGCGGGTGGAGTATGCGGC
CGGGAGCGGGTGTGGGGCGACCTGCACAGCGGGCGGGTGGAGTATGCGGC
CGGGAGCGGGTGTGGGGCGACCTGCACAGCGGGCGGGTGGAGTATGCGGC
CGGGAGCGGGTGTGGGGCGACCTGCACAGCGGGCGGGTGGAGTATGCGGC
CGGGAGCGGGTGTGGGGCGACCTGCACAGCGGGCGGGTGGAGTATGCGGC
CGGGAGCGGGTGTGGGGCGACCTGCACAGCGGGCGGGTGGAGTATGCGGC
CGGGAGCGGGTGTGGGGCGACCTGCACAGCGGGCGGGTGGAGTATGCGGC
CGGGAGCGGGTGTGGGGCGACCTGCACAGCGGGCGGGTGGAGTATGCGGC
TGGAAGTGGCTCTGGGGCAACCTGCGGAGCGGGTGGGTAGCGTTCGAGGC
TGAGAGCGGCTGTGAGGCAACCTACAAGGCGGGTGGGCAGAGTACGAGTC
CGGGAGCGGCTGTGCGGCTGCCTGCGAAGTGGGTGGGCAGAGGTTTGGGC
CGGGAGCGGCTGTGCGGCTGCCTGCGAAGTGGGTGGGCAGAGGTTTGGGC
CGGGAGCGGCTGTGCGGCTGCCTGCGAAGTGGGTGGGCAGAGGTTTGGGC
CGGGAGCGGCTGTGCGGCTGCCTGCGAAGTGGGTGGGCAGAGGTTTGGGC
--------------------------------------------------
CGGGAGCGGCTGTGAGGCGGCCTGCGAAGCGGGTGAGTAGCGTTTGGGAC
TGGGAGCGGCTTTGAGGCAACCTGCGGAGCGGATGAGTATCGTTTGAGGC
TGGGCGCGGCTGTGAGGTGGCCTGCTACGCGG------------CGGGGC
--------------------------GGGCGGGTGAGTACGGTTCGAGGC
TGCGGCTGGCTGCGAGGCGACCTGCGAAGCGCGTGGGTGGAGTTTGAGGC
TGCGGCTGGCTGCGAGGCGACCTGCGAAGCGCGTGGGTGGAGTTTGAGGC
TGCGGCTGGCTGCGAGGCGACCTGCGAAGCGCGTGGGTGGAGTTTGAGGC
[truncated: 166,298 more chars]
