# Supplementary material for: Members of a Large Retroposon Family Are Determinants of Post-Transcriptional Gene Expression in Leishmania
Source: PLoS Pathog. 2007 Sep 28;3(9):e136. doi: 10.1371/journal.ppat.0030136 (PMC2323293; doi:10.1371/journal.ppat.0030136)
Supplement: Figure S3 — The central scale bars showing the size of the chromosomes (kb) separate features located on different strands. The position of protein-encoding genes and retroposons is indicated by vertical bars with the color code shown on the right margin. Protein-encoding genes and DIREs are shown on both central panels, while the upper or lower part of the schematic chromosomes display the position of LmSIDER1 and LmSIDER2. (888 KB DOC) [file ppat.0030136.sg003.pdf]

*L.major* chromosome 1

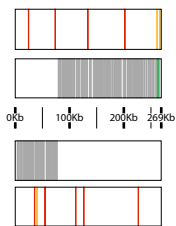

*L.major* chromosome 2

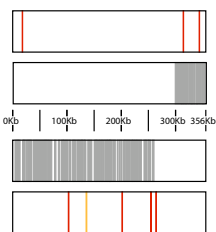

*L.major* chromosome 3

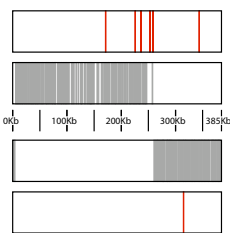

*L.major* chromosome 4

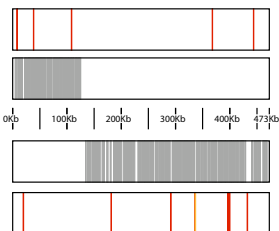

- coding genes
- LmSIDER1
- LmSIDER2
- DIRE

*L.major* chromosome 5

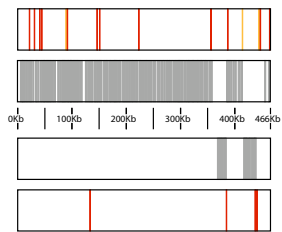

*L.major* chromosome 6

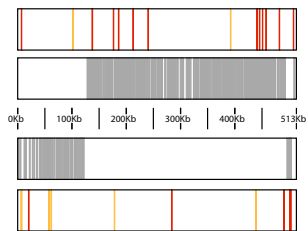

*L.major* chromosome 7

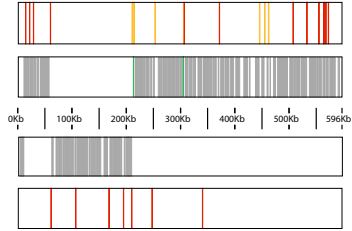

*L.major* chromosome 8

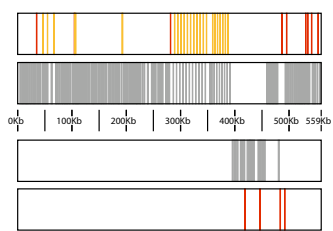

- coding genes
- LmSIDER1
- LmSIDER2
- DIRE

### *L.major* chromosome 9

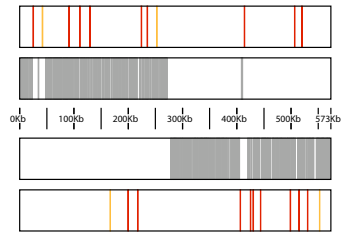

### *L.major* chromosome 10

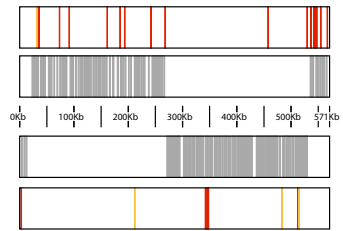

### *L.major* chromosome 11

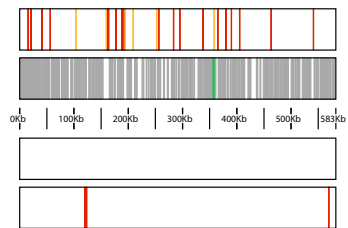

### *L.major* chromosome 12

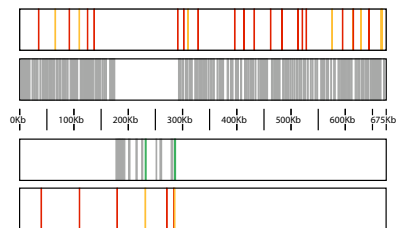

■ coding genes

■ LmSIDER1

■ LmSIDER2

■ DIRE

### *L.major* chromosome 13

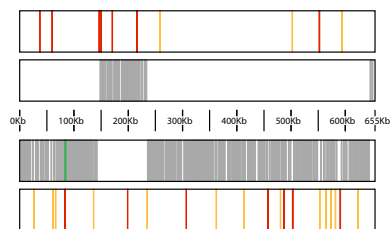

### *L.major* chromosome 14

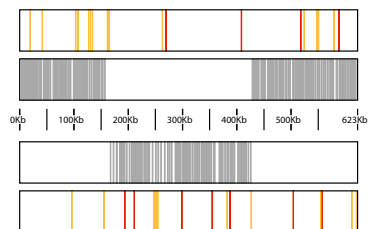

### *L.major* chromosome 15

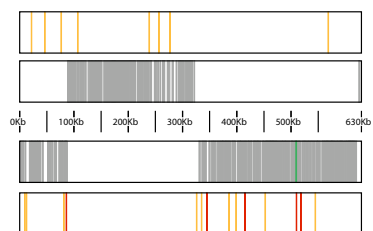

### *L.major* chromosome 16

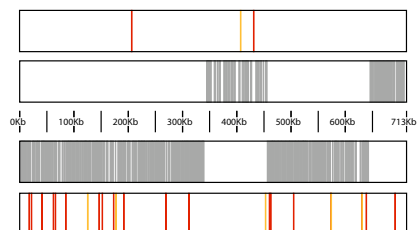

- coding genes
- LmSIDER1
- LmSIDER2
- DIRE

*L.major* chromosome 17

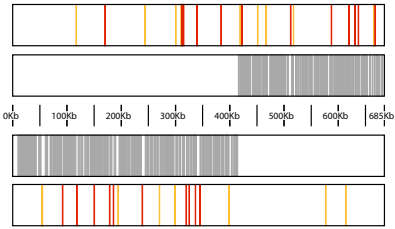

*L.major* chromosome 18

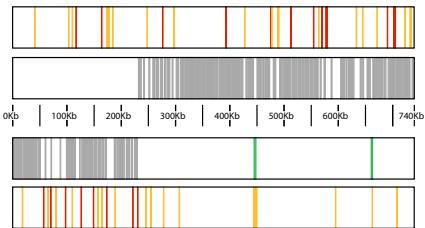

*L.major* chromosome 19

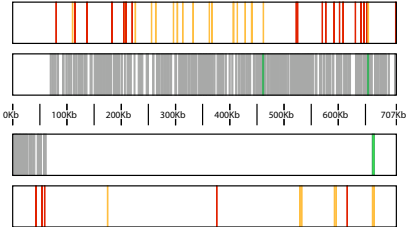

*L.major* chromosome 20

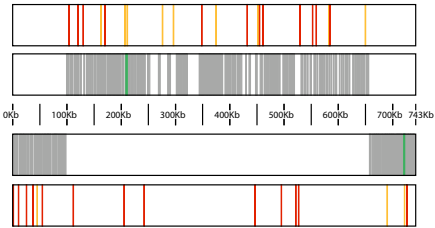

- coding genes
- LmSIDER1
- LmSIDER2
- DIRE

*L.major* chromosome 21

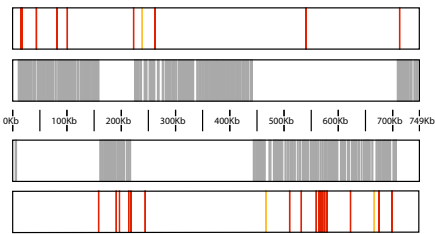

*L.major* chromosome 22

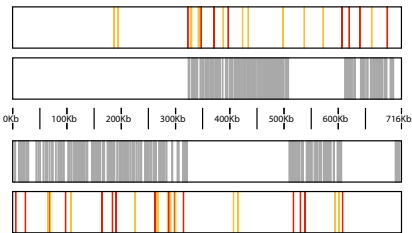

*L.major* chromosome 23

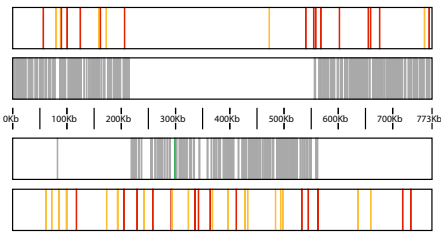

*L.major* chromosome 24

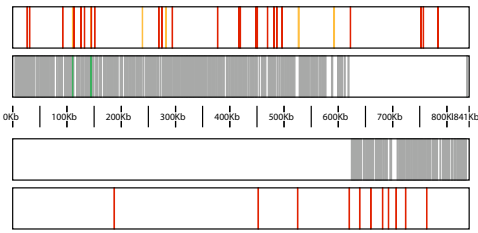

- coding genes
- LmSIDER1
- LmSIDER2
- DIRE

*L.major* chromosome 26

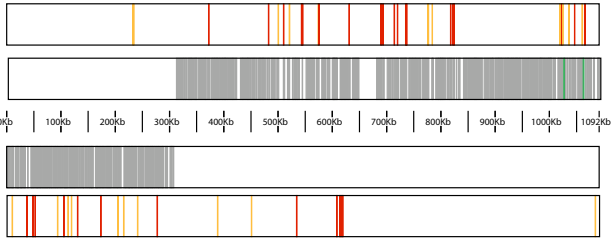

*L.major* chromosome 25

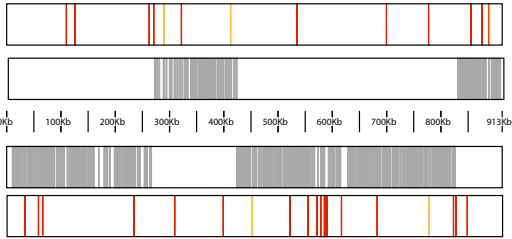

*L.major* chromosome 27

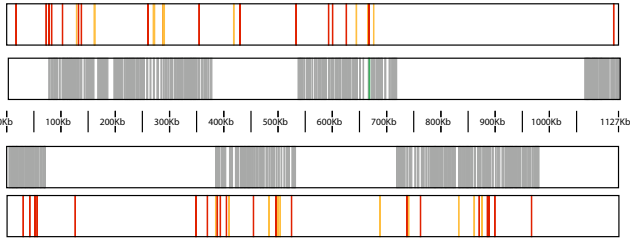

*L.major* chromosome 28

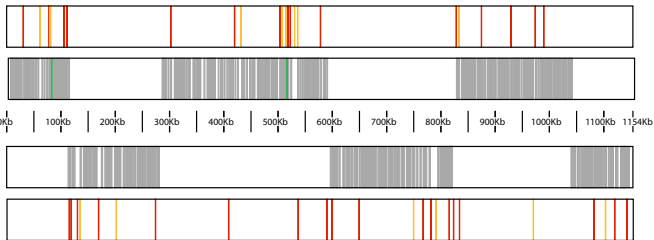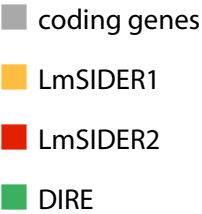

*L.major* chromosome 29

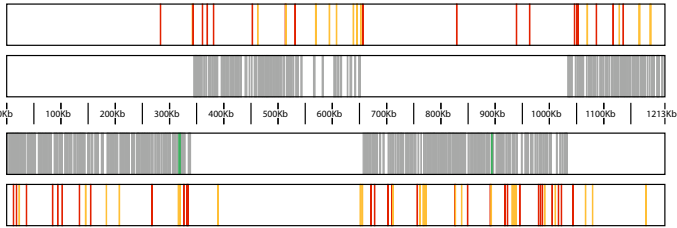

*L.major* chromosome 30

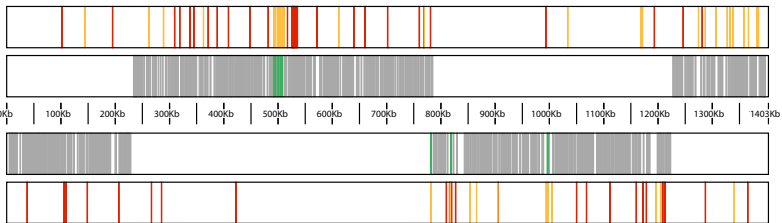

*L.major* chromosome 31

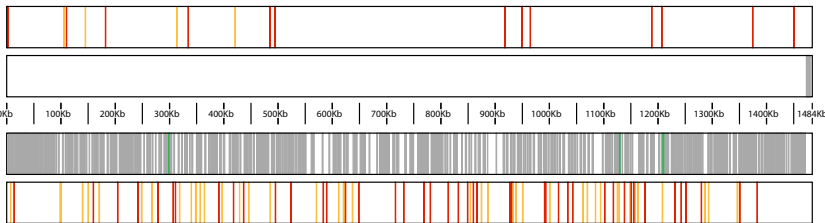

*L.major* chromosome 32

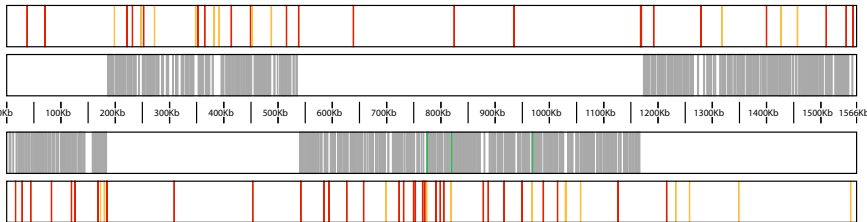

- coding genes
- LmSIDER1
- LmSIDER2
- DIRE

*L.major* chromosome 33

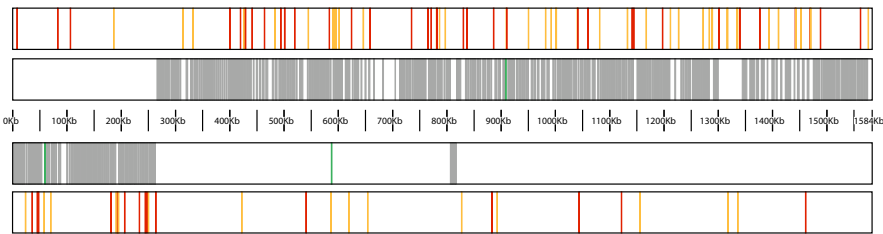

*L.major* chromosome 34

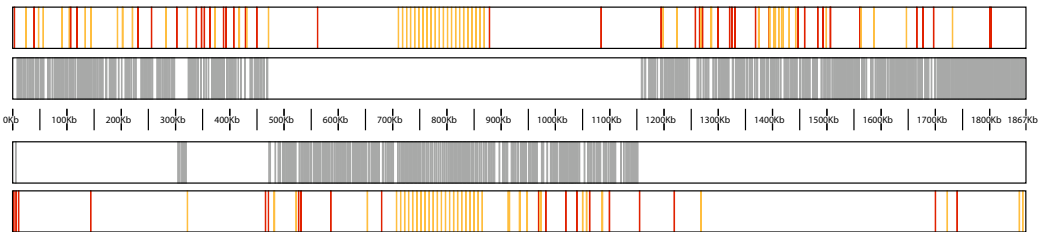

*L.major* chromosome 35

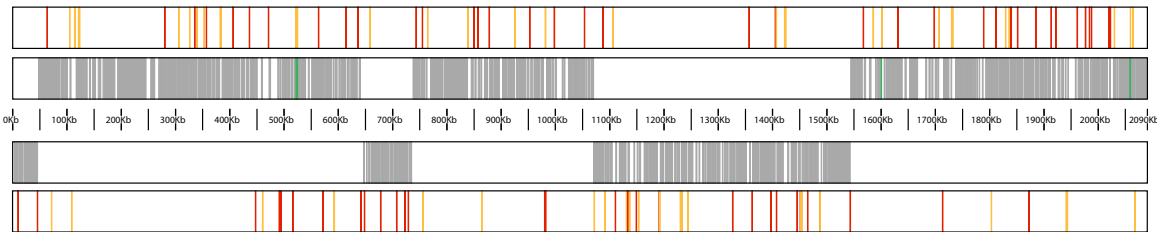

*L.major* chromosome 36

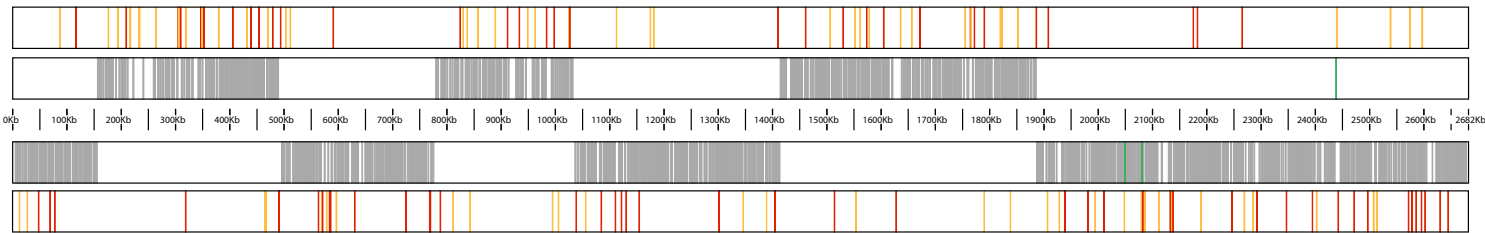

- coding genes
- LmSIDER1
- LmSIDER2
- DIRE
