# Supplementary material for: Members of a Large Retroposon Family Are Determinants of Post-Transcriptional Gene Expression in Leishmania
Source: PubMed Central journal article supplement (PMC2323293; doi:10.1371/journal.ppat.0030136), 2007-09-28
Supplement: ppat.0030136.sg004.pdf [file ppat.0030136.sg004.pdf]

### *T.brucei* chromosome 1

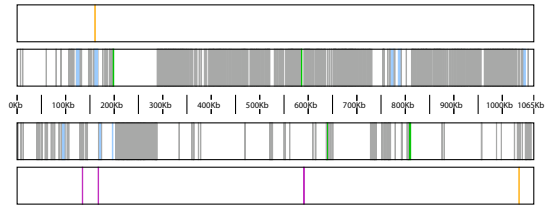

### *T.brucei* chromosome 2

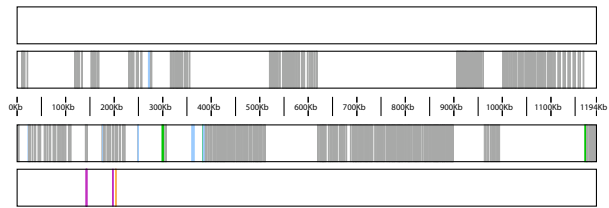

### *T.brucei* chromosome 3

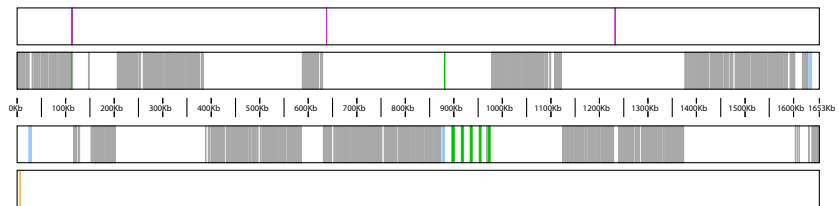

### *T.brucei* chromosome 4

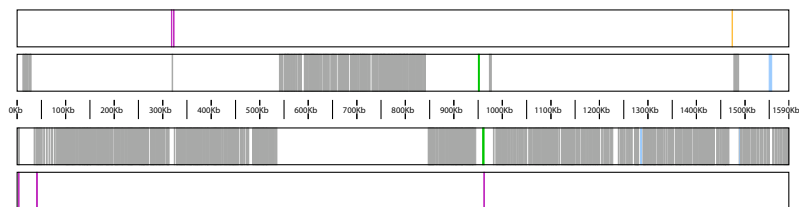

- coding genes
- INGI
- DIRE
- RIME
- TbSIDER

### *T.brucei* chromosome 5

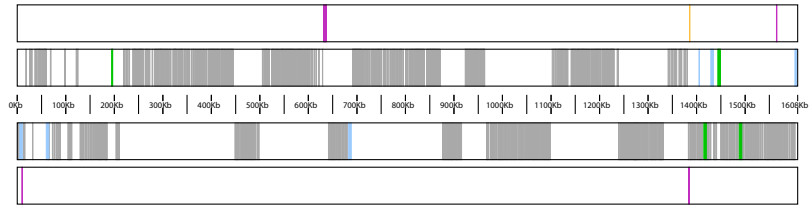

### *T.brucei* chromosome 6

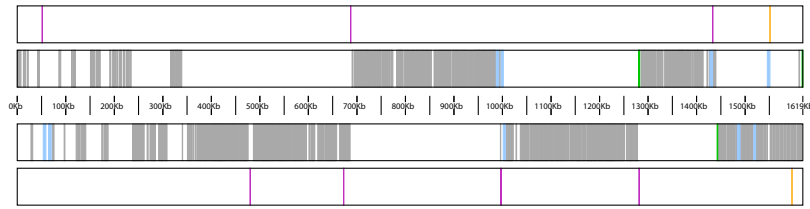

### *T.brucei* chromosome 7

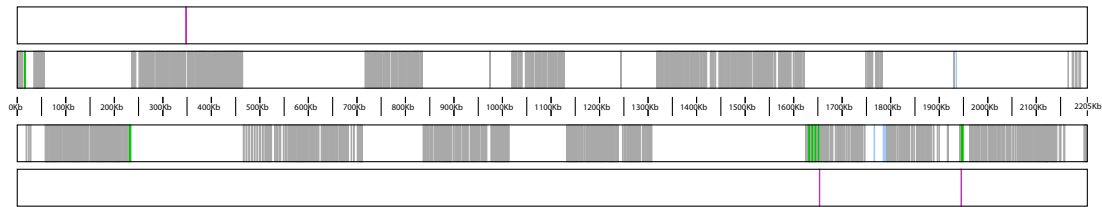

### *T.brucei* chromosome 8

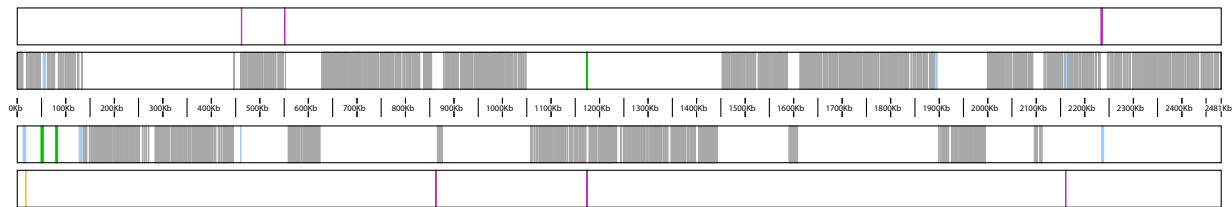

- coding genes
- INGI
- DIRE
- RIME
- TbSIDER

### *T.brucei* chromosome 9

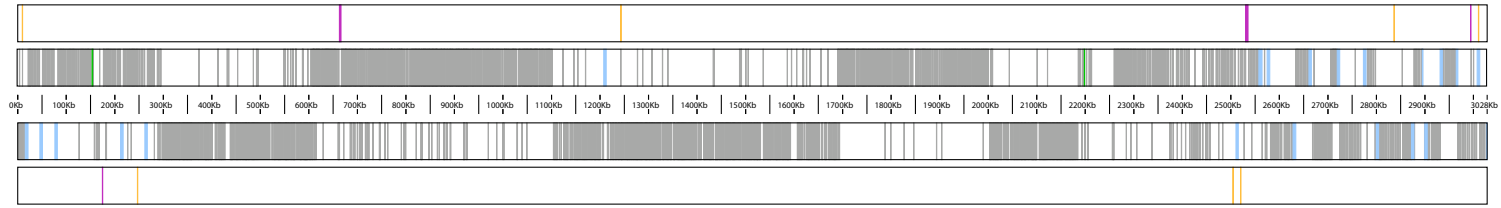

### *T.brucei* chromosome 10

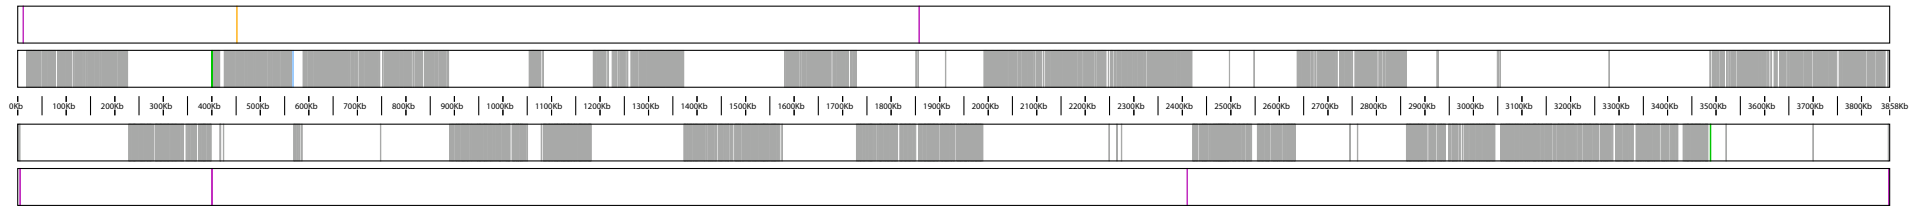

### *T.brucei* chromosome 11 part 1

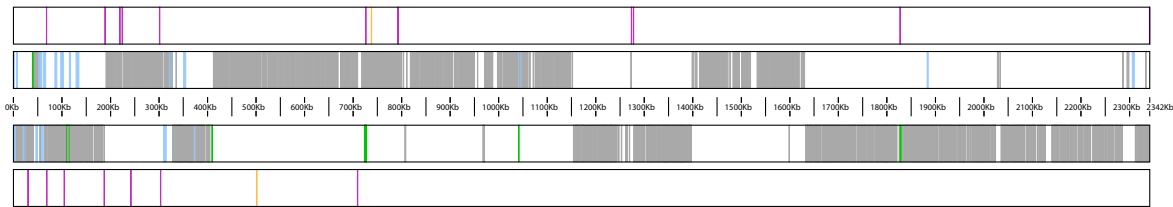

### *T.brucei* chromosome 11 part 2

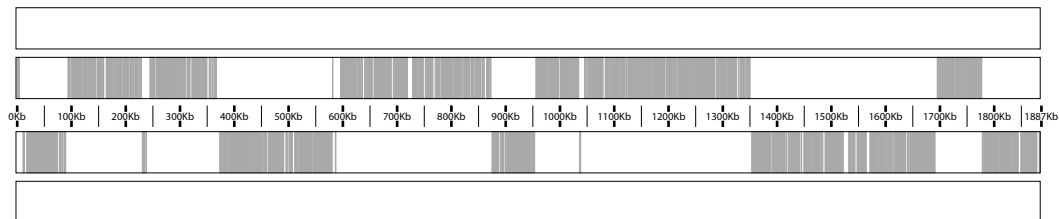

- coding genes
- INGI
- DIRE
- RIME
- TbSIDER

*T.brucei* chromosome 11 part 3

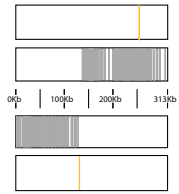

*T.brucei* chromosome 11 part 4

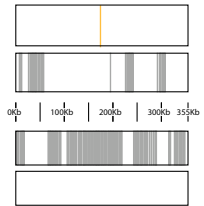

*T.brucei* chromosome 11 part 5

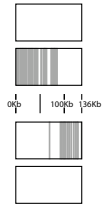

*T.brucei* chromosome 11 part 6

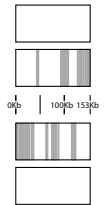

- coding genes
- INGI
- DIRE
- RIME
- TbSIDER

*T.brucei* chromosome 11 part 7

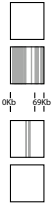

-  coding genes
-  INGI
-  DIRE
-  RIME
-  TbSIDER
