# Supplementary material for: Members of a Large Retroposon Family Are Determinants of Post-Transcriptional Gene Expression in Leishmania
Source: PubMed Central journal article supplement (PMC2323293; doi:10.1371/journal.ppat.0030136), 2007-09-28
Supplement: ppat.0030136.st001.pdf [file ppat.0030136.st001.pdf]

| ID         | chr | name          | fam | str | start  | end    | chr_size |
|------------|-----|---------------|-----|-----|--------|--------|----------|
| 51.te00022 | 1   | chr1_37.00281 | 1   | -   | 39705  | 40532  | 268984   |
| 51.te00019 | 1   | chr1_37.00289 | 1   | +   | 260993 | 261261 | 268984   |
| 51.te00020 | 1   | chr1_37.00290 | 1   | +   | 266162 | 266340 | 268984   |
| 51.te00018 | 1   | chr1_37.00279 | 2   | +   | 24174  | 24821  | 268984   |
| 51.te00021 | 1   | chr1_37.00280 | 2   | -   | 35328  | 36036  | 268984   |
| 51.te00023 | 1   | chr1_37.00282 | 2   | -   | 54542  | 55178  | 268984   |
| 51.te00024 | 1   | chr1_37.00283 | 2   | +   | 73279  | 73917  | 268984   |
| 51.te00013 | 1   | chr1_37.00284 | 2   | -   | 111380 | 111734 | 268984   |
| 51.te00014 | 1   | chr1_37.00285 | 2   | -   | 126000 | 126649 | 268984   |
| 51.te00015 | 1   | chr1_37.00286 | 2   | +   | 133523 | 134013 | 268984   |
| 51.te00016 | 1   | chr1_37.00287 | 2   | +   | 201661 | 202234 | 268984   |
| 51.te00017 | 1   | chr1_37.00288 | 2   | -   | 226657 | 226940 | 268984   |
| 52.te00002 | 2   | chr2_38.00226 | 1   | -   | 135382 | 136457 | 355714   |
| 52.te00003 | 2   | chr2_38.00224 | 2   | +   | 17598  | 18236  | 355714   |
| 52.te00001 | 2   | chr2_38.00225 | 2   | -   | 102691 | 103323 | 355714   |
| 52.te00004 | 2   | chr2_38.00227 | 2   | -   | 201537 | 202251 | 355714   |
| 52.te00005 | 2   | chr2_38.00228 | 2   | -   | 254428 | 255004 | 355714   |
| 52.te00006 | 2   | chr2_38.00229 | 2   | -   | 264195 | 264734 | 355714   |
| 52.te00007 | 2   | chr2_38.00230 | 2   | +   | 314330 | 314887 | 355714   |
| 52.te00008 | 2   | chr2_38.00231 | 2   | +   | 343641 | 344192 | 355714   |
| 53.te00001 | 3   | chr3_39.00295 | 2   | +   | 171068 | 171643 | 384518   |
| 53.te00002 | 3   | chr3_39.00296 | 2   | +   | 225566 | 226067 | 384518   |
| 53.te00003 | 3   | chr3_39.00297 | 2   | +   | 236166 | 236600 | 384518   |
| 53.te00004 | 3   | chr3_39.00298 | 2   | +   | 252516 | 253083 | 384518   |
| 53.te00005 | 3   | chr3_39.00299 | 2   | +   | 258067 | 258658 | 384518   |
| 53.te00006 | 3   | chr3_39.00300 | 2   | -   | 314596 | 314966 | 384518   |
| 53.te00007 | 3   | chr3_39.00301 | 2   | +   | 343386 | 343807 | 384518   |
| 54.te00006 | 4   | chr4_4.00423  | 1   | -   | 336119 | 337040 | 472856   |
| 54.te00013 | 4   | chr4_4.00416  | 2   | +   | 7946   | 8423   | 472856   |
| 54.te00003 | 4   | chr4_4.00417  | 2   | -   | 19425  | 19898  | 472856   |
| 54.te00008 | 4   | chr4_4.00418  | 2   | +   | 38172  | 38588  | 472856   |
| 54.te00001 | 4   | chr4_4.00419  | 2   | +   | 108122 | 108581 | 472856   |
| 54.te00002 | 4   | chr4_4.00420  | 2   | -   | 181541 | 181927 | 472856   |
| 54.te00004 | 4   | chr4_4.00421  | 2   | -   | 290986 | 291500 | 472856   |
| 54.te00005 | 4   | chr4_4.00422  | 2   | -   | 335367 | 335810 | 472856   |
| 54.te00007 | 4   | chr4_4.00424  | 2   | +   | 367761 | 368203 | 472856   |
| 54.te00009 | 4   | chr4_4.00425  | 2   | -   | 396450 | 396896 | 472856   |
| 54.te00010 | 4   | chr4_4.00426  | 2   | -   | 399589 | 400014 | 472856   |
| 54.te00011 | 4   | chr4_4.00427  | 2   | -   | 432185 | 432800 | 472856   |
| 54.te00012 | 4   | chr4_4.00428  | 2   | +   | 443516 | 443993 | 472856   |
| 55.te00018 | 5   | chr5_5.00339  | 1   | +   | 90841  | 91072  | 465823   |
| 55.te00011 | 5   | chr5_5.00348  | 1   | +   | 413942 | 414427 | 465823   |
| 55.te00015 | 5   | chr5_5.00351  | 1   | +   | 444412 | 445160 | 465823   |
| 55.te00004 | 5   | chr5_5.00335  | 2   | +   | 21407  | 22009  | 465823   |
| 55.te00006 | 5   | chr5_5.00336  | 2   | +   | 30666  | 31304  | 465823   |
| 55.te00010 | 5   | chr5_5.00337  | 2   | +   | 40438  | 40917  | 465823   |
| 55.te00013 | 5   | chr5_5.00338  | 2   | +   | 44064  | 44598  | 465823   |
| 55.te00019 | 5   | chr5_5.00340  | 2   | +   | 91501  | 91943  | 465823   |
| 55.te00001 | 5   | chr5_5.00341  | 2   | -   | 133215 | 133682 | 465823   |
| 55.te00002 | 5   | chr5_5.00342  | 2   | +   | 146145 | 146639 | 465823   |
| 55.te00003 | 5   | chr5_5.00343  | 2   | +   | 150839 | 151245 | 465823   |

|            |   |              |   |   |        |        |        |
|------------|---|--------------|---|---|--------|--------|--------|
| 55.te00005 | 5 | chr5_5.00344 | 2 | + | 222900 | 223499 | 465823 |
| 55.te00007 | 5 | chr5_5.00345 | 2 | + | 355962 | 356336 | 465823 |
| 55.te00008 | 5 | chr5_5.00346 | 2 | - | 384475 | 384939 | 465823 |
| 55.te00009 | 5 | chr5_5.00347 | 2 | + | 386816 | 387303 | 465823 |
| 55.te00012 | 5 | chr5_5.00349 | 2 | - | 437364 | 437911 | 465823 |
| 55.te00014 | 5 | chr5_5.00350 | 2 | - | 440590 | 441136 | 465823 |
| 55.te00016 | 5 | chr5_5.00352 | 2 | + | 446988 | 447532 | 465823 |
| 55.te00017 | 5 | chr5_5.00353 | 2 | + | 464001 | 464509 | 465823 |
| 56.te00023 | 6 | chr6_6.00295 | 1 | - | 6327   | 6767   | 513422 |
| 56.te00025 | 6 | chr6_6.00297 | 1 | - | 7380   | 7589   | 513422 |
| 56.te00021 | 6 | chr6_6.00299 | 1 | - | 57422  | 57917  | 513422 |
| 56.te00022 | 6 | chr6_6.00300 | 1 | - | 61644  | 62048  | 513422 |
| 56.te00001 | 6 | chr6_6.00301 | 1 | + | 101650 | 102456 | 513422 |
| 56.te00004 | 6 | chr6_6.00304 | 1 | - | 178220 | 178503 | 513422 |
| 56.te00010 | 6 | chr6_6.00309 | 1 | + | 392147 | 392407 | 513422 |
| 56.te00011 | 6 | chr6_6.00310 | 1 | - | 438460 | 439271 | 513422 |
| 56.te00024 | 6 | chr6_6.00296 | 2 | + | 6768   | 7379   | 513422 |
| 56.te00006 | 6 | chr6_6.00298 | 2 | - | 19889  | 20502  | 513422 |
| 56.te00002 | 6 | chr6_6.00302 | 2 | + | 137182 | 137798 | 513422 |
| 56.te00003 | 6 | chr6_6.00303 | 2 | + | 176245 | 176890 | 513422 |
| 56.te00005 | 6 | chr6_6.00305 | 2 | + | 185670 | 186275 | 513422 |
| 56.te00007 | 6 | chr6_6.00306 | 2 | + | 212563 | 213170 | 513422 |
| 56.te00008 | 6 | chr6_6.00307 | 2 | + | 240216 | 240827 | 513422 |
| 56.te00009 | 6 | chr6_6.00308 | 2 | - | 283607 | 284031 | 513422 |
| 56.te00012 | 6 | chr6_6.00311 | 2 | + | 440883 | 441360 | 513422 |
| 56.te00013 | 6 | chr6_6.00312 | 2 | + | 445495 | 445986 | 513422 |
| 56.te00014 | 6 | chr6_6.00313 | 2 | + | 450932 | 451439 | 513422 |
| 56.te00015 | 6 | chr6_6.00314 | 2 | + | 457548 | 457967 | 513422 |
| 56.te00016 | 6 | chr6_6.00315 | 2 | + | 482072 | 482591 | 513422 |
| 56.te00017 | 6 | chr6_6.00316 | 2 | - | 490377 | 490884 | 513422 |
| 56.te00018 | 6 | chr6_6.00317 | 2 | - | 501044 | 501619 | 513422 |
| 56.te00019 | 6 | chr6_6.00318 | 2 | - | 502874 | 503338 | 513422 |
| 56.te00020 | 6 | chr6_6.00319 | 2 | + | 507884 | 508405 | 513422 |
| 57.te00023 | 7 | chr7_7.00415 | 1 | + | 209666 | 210003 | 596348 |
| 57.te00024 | 7 | chr7_7.00416 | 1 | + | 212757 | 213679 | 596348 |
| 57.te00026 | 7 | chr7_7.00418 | 1 | + | 251846 | 252218 | 596348 |
| 57.te00028 | 7 | chr7_7.00419 | 1 | + | 304190 | 305151 | 596348 |
| 57.te00033 | 7 | chr7_7.00423 | 1 | + | 444162 | 445147 | 596348 |
| 57.te00034 | 7 | chr7_7.00424 | 1 | + | 453886 | 454444 | 596348 |
| 57.te00035 | 7 | chr7_7.00425 | 1 | + | 460775 | 461791 | 596348 |
| 57.te00018 | 7 | chr7_7.00406 | 2 | + | 13394  | 13844  | 596348 |
| 57.te00021 | 7 | chr7_7.00407 | 2 | + | 20667  | 21214  | 596348 |
| 57.te00027 | 7 | chr7_7.00408 | 2 | + | 27810  | 28293  | 596348 |
| 57.te00042 | 7 | chr7_7.00409 | 2 | + | 59017  | 59505  | 596348 |
| 57.te00043 | 7 | chr7_7.00410 | 2 | - | 60181  | 60831  | 596348 |
| 57.te00017 | 7 | chr7_7.00411 | 2 | - | 105542 | 106179 | 596348 |
| 57.te00019 | 7 | chr7_7.00412 | 2 | - | 167012 | 167515 | 596348 |
| 57.te00020 | 7 | chr7_7.00413 | 2 | - | 193627 | 194180 | 596348 |
| 57.te00022 | 7 | chr7_7.00414 | 2 | - | 208722 | 209299 | 596348 |
| 57.te00025 | 7 | chr7_7.00417 | 2 | - | 246241 | 246922 | 596348 |
| 57.te00029 | 7 | chr7_7.00420 | 2 | + | 305571 | 306180 | 596348 |
| 57.te00031 | 7 | chr7_7.00421 | 2 | - | 339201 | 339725 | 596348 |

|            |   |              |   |   |        |        |        |
|------------|---|--------------|---|---|--------|--------|--------|
| 57.te00032 | 7 | chr7_7.00422 | 2 | + | 370324 | 370865 | 596348 |
| 57.te00036 | 7 | chr7_7.00426 | 2 | + | 506114 | 506704 | 596348 |
| 57.te00037 | 7 | chr7_7.00427 | 2 | + | 531398 | 532034 | 596348 |
| 57.te00038 | 7 | chr7_7.00428 | 2 | + | 553606 | 554095 | 596348 |
| 57.te00039 | 7 | chr7_7.00429 | 2 | + | 562873 | 563495 | 596348 |
| 57.te00040 | 7 | chr7_7.00430 | 2 | + | 566451 | 566952 | 596348 |
| 57.te00041 | 7 | chr7_7.00431 | 2 | + | 571060 | 571650 | 596348 |
| 58.te00028 | 8 | chr8_8.00369 | 1 | + | 46578  | 47000  | 559245 |
| 58.te00036 | 8 | chr8_8.00370 | 1 | + | 54807  | 55176  | 559245 |
| 58.te00038 | 8 | chr8_8.00371 | 1 | + | 66418  | 67263  | 559245 |
| 58.te00002 | 8 | chr8_8.00373 | 1 | + | 104930 | 105246 | 559245 |
| 58.te00003 | 8 | chr8_8.00374 | 1 | + | 106628 | 106929 | 559245 |
| 58.te00004 | 8 | chr8_8.00375 | 1 | + | 192520 | 192788 | 559245 |
| 58.te00005 | 8 | chr8_8.00376 | 1 | + | 192998 | 193635 | 559245 |
| 58.te00007 | 8 | chr8_8.00378 | 1 | + | 288961 | 289511 | 559245 |
| 58.te00008 | 8 | chr8_8.00379 | 1 | + | 294840 | 295389 | 559245 |
| 58.te00009 | 8 | chr8_8.00380 | 1 | + | 300727 | 301211 | 559245 |
| 58.te00010 | 8 | chr8_8.00381 | 1 | + | 306596 | 307146 | 559245 |
| 58.te00011 | 8 | chr8_8.00382 | 1 | + | 312477 | 313067 | 559245 |
| 58.te00012 | 8 | chr8_8.00383 | 1 | + | 318342 | 318892 | 559245 |
| 58.te00013 | 8 | chr8_8.00384 | 1 | + | 324223 | 324773 | 559245 |
| 58.te00014 | 8 | chr8_8.00385 | 1 | + | 330087 | 330637 | 559245 |
| 58.te00015 | 8 | chr8_8.00386 | 1 | + | 335968 | 336518 | 559245 |
| 58.te00016 | 8 | chr8_8.00387 | 1 | + | 341829 | 342379 | 559245 |
| 58.te00018 | 8 | chr8_8.00388 | 1 | + | 347697 | 348247 | 559245 |
| 58.te00019 | 8 | chr8_8.00389 | 1 | + | 359093 | 359412 | 559245 |
| 58.te00020 | 8 | chr8_8.00390 | 1 | + | 363200 | 363589 | 559245 |
| 58.te00021 | 8 | chr8_8.00391 | 1 | + | 368020 | 368409 | 559245 |
| 58.te00022 | 8 | chr8_8.00392 | 1 | + | 372836 | 373225 | 559245 |
| 58.te00023 | 8 | chr8_8.00393 | 1 | + | 377653 | 378042 | 559245 |
| 58.te00024 | 8 | chr8_8.00394 | 1 | + | 382469 | 382858 | 559245 |
| 58.te00025 | 8 | chr8_8.00395 | 1 | + | 387287 | 387676 | 559245 |
| 58.te00017 | 8 | chr8_8.00368 | 2 | + | 34679  | 35263  | 559245 |
| 58.te00001 | 8 | chr8_8.00372 | 2 | + | 104390 | 104921 | 559245 |
| 58.te00006 | 8 | chr8_8.00377 | 2 | + | 281447 | 281905 | 559245 |
| 58.te00026 | 8 | chr8_8.00396 | 2 | - | 418475 | 418943 | 559245 |
| 58.te00027 | 8 | chr8_8.00397 | 2 | - | 446115 | 446693 | 559245 |
| 58.te00029 | 8 | chr8_8.00398 | 2 | - | 483498 | 484064 | 559245 |
| 58.te00030 | 8 | chr8_8.00399 | 2 | + | 486608 | 487167 | 559245 |
| 58.te00031 | 8 | chr8_8.00400 | 2 | - | 491788 | 492360 | 559245 |
| 58.te00032 | 8 | chr8_8.00401 | 2 | + | 495316 | 495867 | 559245 |
| 58.te00033 | 8 | chr8_8.00402 | 2 | + | 530516 | 530969 | 559245 |
| 58.te00034 | 8 | chr8_8.00403 | 2 | + | 534274 | 534713 | 559245 |
| 58.te00035 | 8 | chr8_8.00404 | 2 | + | 541360 | 541889 | 559245 |
| 58.te00037 | 8 | chr8_8.00405 | 2 | + | 553356 | 553919 | 559245 |
| 59.te00012 | 9 | chr9_9.00352 | 1 | + | 41555  | 42555  | 573441 |
| 59.te00003 | 9 | chr9_9.00356 | 1 | - | 166853 | 167203 | 573441 |
| 59.te00009 | 9 | chr9_9.00361 | 1 | + | 252269 | 252848 | 573441 |
| 59.te00021 | 9 | chr9_9.00372 | 1 | - | 552394 | 552842 | 573441 |
| 59.te00008 | 9 | chr9_9.00351 | 2 | + | 24862  | 25362  | 573441 |
| 59.te00022 | 9 | chr9_9.00353 | 2 | + | 90828  | 91404  | 573441 |
| 59.te00001 | 9 | chr9_9.00354 | 2 | + | 110413 | 110990 | 573441 |

|            |    |                |   |   |        |        |        |
|------------|----|----------------|---|---|--------|--------|--------|
| 59.te00002 | 9  | chr9_9.00355   | 2 | + | 129099 | 129512 | 573441 |
| 59.te00004 | 9  | chr9_9.00357   | 2 | - | 199680 | 200237 | 573441 |
| 59.te00005 | 9  | chr9_9.00358   | 2 | - | 217295 | 217687 | 573441 |
| 59.te00006 | 9  | chr9_9.00359   | 2 | + | 224126 | 224524 | 573441 |
| 59.te00007 | 9  | chr9_9.00360   | 2 | + | 234934 | 235158 | 573441 |
| 59.te00010 | 9  | chr9_9.00362   | 2 | - | 406642 | 406881 | 573441 |
| 59.te00011 | 9  | chr9_9.00363   | 2 | + | 413803 | 414373 | 573441 |
| 59.te00013 | 9  | chr9_9.00364   | 2 | - | 425129 | 425732 | 573441 |
| 59.te00014 | 9  | chr9_9.00365   | 2 | - | 430061 | 430634 | 573441 |
| 59.te00015 | 9  | chr9_9.00366   | 2 | - | 443487 | 444062 | 573441 |
| 59.te00016 | 9  | chr9_9.00367   | 2 | - | 498591 | 499063 | 573441 |
| 59.te00017 | 9  | chr9_9.00368   | 2 | + | 506279 | 506606 | 573441 |
| 59.te00018 | 9  | chr9_9.00369   | 2 | - | 514561 | 515018 | 573441 |
| 59.te00019 | 9  | chr9_9.00370   | 2 | + | 519783 | 520193 | 573441 |
| 59.te00020 | 9  | chr9_9.00371   | 2 | - | 530166 | 530646 | 573441 |
| 60.te00007 | 10 | chr10_10.00446 | 1 | + | 31489  | 32354  | 570864 |
| 60.te00004 | 10 | chr10_10.00453 | 1 | - | 211539 | 212466 | 570864 |
| 60.te00014 | 10 | chr10_10.00460 | 1 | - | 483320 | 483648 | 570864 |
| 60.te00016 | 10 | chr10_10.00462 | 1 | - | 514361 | 515209 | 570864 |
| 60.te00008 | 10 | chr10_10.00445 | 2 | - | 2738   | 3314   | 570864 |
| 60.te00012 | 10 | chr10_10.00447 | 2 | + | 35222  | 35746  | 570864 |
| 60.te00024 | 10 | chr10_10.00448 | 2 | + | 72999  | 73626  | 570864 |
| 60.te00025 | 10 | chr10_10.00449 | 2 | + | 91105  | 91729  | 570864 |
| 60.te00001 | 10 | chr10_10.00450 | 2 | + | 161146 | 161602 | 570864 |
| 60.te00002 | 10 | chr10_10.00451 | 2 | + | 184806 | 185324 | 570864 |
| 60.te00003 | 10 | chr10_10.00452 | 2 | + | 193220 | 193696 | 570864 |
| 60.te00005 | 10 | chr10_10.00454 | 2 | + | 241517 | 242154 | 570864 |
| 60.te00006 | 10 | chr10_10.00455 | 2 | + | 267766 | 268422 | 570864 |
| 60.te00009 | 10 | chr10_10.00456 | 2 | - | 341889 | 342537 | 570864 |
| 60.te00010 | 10 | chr10_10.00457 | 2 | - | 344732 | 345368 | 570864 |
| 60.te00011 | 10 | chr10_10.00458 | 2 | - | 347563 | 348199 | 570864 |
| 60.te00013 | 10 | chr10_10.00459 | 2 | + | 457452 | 458075 | 570864 |
| 60.te00015 | 10 | chr10_10.00461 | 2 | - | 511911 | 512475 | 570864 |
| 60.te00017 | 10 | chr10_10.00463 | 2 | + | 529527 | 530109 | 570864 |
| 60.te00018 | 10 | chr10_10.00464 | 2 | + | 536509 | 537091 | 570864 |
| 60.te00019 | 10 | chr10_10.00465 | 2 | + | 541770 | 542337 | 570864 |
| 60.te00020 | 10 | chr10_10.00466 | 2 | + | 543991 | 544553 | 570864 |
| 60.te00021 | 10 | chr10_10.00467 | 2 | + | 547215 | 547781 | 570864 |
| 60.te00022 | 10 | chr10_10.00468 | 2 | + | 554605 | 555179 | 570864 |
| 60.te00023 | 10 | chr10_10.00469 | 2 | + | 566480 | 567052 | 570864 |
| 61.te00002 | 11 | chr11_11.00331 | 1 | + | 103849 | 104197 | 582575 |
| 61.te00006 | 11 | chr11_11.00334 | 1 | + | 159134 | 160051 | 582575 |
| 61.te00012 | 11 | chr11_11.00340 | 1 | + | 194294 | 194777 | 582575 |
| 61.te00014 | 11 | chr11_11.00341 | 1 | + | 208610 | 209624 | 582575 |
| 61.te00015 | 11 | chr11_11.00342 | 1 | + | 252041 | 252571 | 582575 |
| 61.te00020 | 11 | chr11_11.00347 | 1 | + | 357921 | 358884 | 582575 |
| 61.te00005 | 11 | chr11_11.00327 | 2 | + | 15300  | 15608  | 582575 |
| 61.te00013 | 11 | chr11_11.00328 | 2 | + | 20530  | 20838  | 582575 |
| 61.te00025 | 11 | chr11_11.00329 | 2 | + | 40675  | 40984  | 582575 |
| 61.te00028 | 11 | chr11_11.00330 | 2 | + | 55892  | 56460  | 582575 |
| 61.te00003 | 11 | chr11_11.00332 | 2 | - | 120055 | 120617 | 582575 |
| 61.te00004 | 11 | chr11_11.00333 | 2 | - | 123050 | 123575 | 582575 |

|            |    |                |   |   |        |        |        |
|------------|----|----------------|---|---|--------|--------|--------|
| 61.te00007 | 11 | chr11_11.00335 | 2 | + | 162121 | 162664 | 582575 |
| 61.te00008 | 11 | chr11_11.00336 | 2 | + | 163729 | 164248 | 582575 |
| 61.te00009 | 11 | chr11_11.00337 | 2 | + | 177074 | 177616 | 582575 |
| 61.te00010 | 11 | chr11_11.00338 | 2 | + | 188266 | 188797 | 582575 |
| 61.te00011 | 11 | chr11_11.00339 | 2 | + | 192111 | 192658 | 582575 |
| 61.te00016 | 11 | chr11_11.00343 | 2 | + | 255908 | 256604 | 582575 |
| 61.te00017 | 11 | chr11_11.00344 | 2 | + | 283166 | 283807 | 582575 |
| 61.te00018 | 11 | chr11_11.00345 | 2 | + | 294782 | 295409 | 582575 |
| 61.te00019 | 11 | chr11_11.00346 | 2 | + | 337654 | 338230 | 582575 |
| 61.te00021 | 11 | chr11_11.00348 | 2 | + | 364824 | 365283 | 582575 |
| 61.te00022 | 11 | chr11_11.00349 | 2 | + | 380045 | 380502 | 582575 |
| 61.te00023 | 11 | chr11_11.00350 | 2 | + | 389833 | 390296 | 582575 |
| 61.te00024 | 11 | chr11_11.00351 | 2 | + | 404985 | 405444 | 582575 |
| 61.te00026 | 11 | chr11_11.00352 | 2 | + | 463050 | 463441 | 582575 |
| 61.te00027 | 11 | chr11_11.00353 | 2 | + | 540775 | 541410 | 582575 |
| 61.te00029 | 11 | chr11_11.00354 | 2 | - | 569201 | 569824 | 582575 |
| 62.te00032 | 12 | chr12_12.00387 | 1 | + | 65155  | 66023  | 675238 |
| 62.te00003 | 12 | chr12_12.00389 | 1 | + | 109534 | 110215 | 675238 |
| 62.te00008 | 12 | chr12_12.00394 | 1 | - | 230027 | 231087 | 675238 |
| 62.te00011 | 12 | chr12_12.00397 | 1 | - | 284030 | 285093 | 675238 |
| 62.te00014 | 12 | chr12_12.00400 | 1 | + | 308877 | 309358 | 675238 |
| 62.te00026 | 12 | chr12_12.00410 | 1 | + | 565524 | 565993 | 675238 |
| 62.te00028 | 12 | chr12_12.00412 | 1 | + | 603686 | 604571 | 675238 |
| 62.te00030 | 12 | chr12_12.00414 | 1 | + | 618285 | 619143 | 675238 |
| 62.te00033 | 12 | chr12_12.00416 | 1 | + | 655809 | 656358 | 675238 |
| 62.te00034 | 12 | chr12_12.00417 | 1 | + | 657335 | 658190 | 675238 |
| 62.te00016 | 12 | chr12_12.00385 | 2 | + | 34647  | 35191  | 675238 |
| 62.te00018 | 12 | chr12_12.00386 | 2 | - | 39742  | 40325  | 675238 |
| 62.te00035 | 12 | chr12_12.00388 | 2 | + | 91309  | 91788  | 675238 |
| 62.te00004 | 12 | chr12_12.00390 | 2 | - | 110068 | 110637 | 675238 |
| 62.te00005 | 12 | chr12_12.00391 | 2 | + | 124803 | 125312 | 675238 |
| 62.te00006 | 12 | chr12_12.00392 | 2 | + | 137039 | 137603 | 675238 |
| 62.te00007 | 12 | chr12_12.00393 | 2 | - | 179374 | 179949 | 675238 |
| 62.te00009 | 12 | chr12_12.00395 | 2 | - | 269877 | 270472 | 675238 |
| 62.te00010 | 12 | chr12_12.00396 | 2 | - | 282968 | 283286 | 675238 |
| 62.te00012 | 12 | chr12_12.00398 | 2 | + | 289904 | 290381 | 675238 |
| 62.te00013 | 12 | chr12_12.00399 | 2 | + | 301008 | 301372 | 675238 |
| 62.te00015 | 12 | chr12_12.00401 | 2 | + | 327525 | 328105 | 675238 |
| 62.te00017 | 12 | chr12_12.00402 | 2 | + | 386605 | 387165 | 675238 |
| 62.te00019 | 12 | chr12_12.00403 | 2 | + | 394538 | 395099 | 675238 |
| 62.te00020 | 12 | chr12_12.00404 | 2 | + | 407661 | 408232 | 675238 |
| 62.te00021 | 12 | chr12_12.00405 | 2 | + | 447391 | 447951 | 675238 |
| 62.te00022 | 12 | chr12_12.00406 | 2 | + | 462769 | 463329 | 675238 |
| 62.te00023 | 12 | chr12_12.00407 | 2 | + | 491331 | 491891 | 675238 |
| 62.te00024 | 12 | chr12_12.00408 | 2 | + | 526727 | 527287 | 675238 |
| 62.te00025 | 12 | chr12_12.00409 | 2 | + | 535463 | 536023 | 675238 |
| 62.te00027 | 12 | chr12_12.00411 | 2 | + | 584733 | 585309 | 675238 |
| 62.te00029 | 12 | chr12_12.00413 | 2 | + | 604576 | 605141 | 675238 |
| 62.te00031 | 12 | chr12_12.00415 | 2 | + | 633595 | 634106 | 675238 |
| 63.te00013 | 13 | chr13_13.00427 | 1 | + | 36815  | 37116  | 654604 |
| 63.te00027 | 13 | chr13_13.00428 | 1 | + | 59512  | 59826  | 654604 |
| 63.te00031 | 13 | chr13_13.00431 | 1 | - | 82998  | 83696  | 654604 |

|            |    |                |   |   |        |        |        |
|------------|----|----------------|---|---|--------|--------|--------|
| 63.te00003 | 13 | chr13_13.00433 | 1 | + | 146183 | 146877 | 654604 |
| 63.te00004 | 13 | chr13_13.00434 | 1 | + | 149851 | 150291 | 654604 |
| 63.te00005 | 13 | chr13_13.00435 | 1 | + | 170269 | 170968 | 654604 |
| 63.te00006 | 13 | chr13_13.00436 | 1 | - | 198659 | 199070 | 654604 |
| 63.te00007 | 13 | chr13_13.00437 | 1 | + | 215659 | 216533 | 654604 |
| 63.te00011 | 13 | chr13_13.00440 | 1 | - | 306886 | 307244 | 654604 |
| 63.te00015 | 13 | chr13_13.00443 | 1 | - | 457288 | 457593 | 654604 |
| 63.te00017 | 13 | chr13_13.00445 | 1 | - | 486917 | 487319 | 654604 |
| 63.te00019 | 13 | chr13_13.00447 | 1 | - | 502638 | 503702 | 654604 |
| 63.te00020 | 13 | chr13_13.00448 | 1 | + | 551603 | 552664 | 654604 |
| 63.te00025 | 13 | chr13_13.00453 | 1 | - | 590271 | 591151 | 654604 |
| 63.te00010 | 13 | chr13_13.00426 | 2 | - | 26150  | 26702  | 654604 |
| 63.te00028 | 13 | chr13_13.00429 | 2 | - | 61205  | 61738  | 654604 |
| 63.te00030 | 13 | chr13_13.00430 | 2 | - | 66060  | 66523  | 654604 |
| 63.te00002 | 13 | chr13_13.00432 | 2 | - | 135964 | 136513 | 654604 |
| 63.te00008 | 13 | chr13_13.00438 | 2 | - | 234680 | 235210 | 654604 |
| 63.te00009 | 13 | chr13_13.00439 | 2 | + | 258400 | 258883 | 654604 |
| 63.te00012 | 13 | chr13_13.00441 | 2 | - | 361914 | 362564 | 654604 |
| 63.te00014 | 13 | chr13_13.00442 | 2 | - | 413237 | 413782 | 654604 |
| 63.te00016 | 13 | chr13_13.00444 | 2 | - | 480172 | 480786 | 654604 |
| 63.te00018 | 13 | chr13_13.00446 | 2 | + | 502030 | 502626 | 654604 |
| 63.te00021 | 13 | chr13_13.00449 | 2 | - | 552676 | 553272 | 654604 |
| 63.te00022 | 13 | chr13_13.00450 | 2 | - | 564245 | 564844 | 654604 |
| 63.te00023 | 13 | chr13_13.00451 | 2 | - | 573422 | 574052 | 654604 |
| 63.te00024 | 13 | chr13_13.00452 | 2 | - | 581440 | 582026 | 654604 |
| 63.te00026 | 13 | chr13_13.00454 | 2 | + | 593756 | 594334 | 654604 |
| 63.te00029 | 13 | chr13_13.00455 | 2 | - | 623099 | 623715 | 654604 |
| 64.te00010 | 14 | chr14_14.00368 | 1 | - | 193413 | 194045 | 622648 |
| 64.te00011 | 14 | chr14_14.00369 | 1 | - | 211249 | 211462 | 622648 |
| 64.te00017 | 14 | chr14_14.00375 | 1 | + | 269551 | 269981 | 622648 |
| 64.te00018 | 14 | chr14_14.00376 | 1 | - | 298548 | 298976 | 622648 |
| 64.te00019 | 14 | chr14_14.00377 | 1 | - | 354325 | 355123 | 622648 |
| 64.te00021 | 14 | chr14_14.00379 | 1 | - | 387369 | 387650 | 622648 |
| 64.te00022 | 14 | chr14_14.00380 | 1 | + | 408207 | 408660 | 622648 |
| 64.te00025 | 14 | chr14_14.00382 | 1 | - | 504007 | 504497 | 622648 |
| 64.te00026 | 14 | chr14_14.00383 | 1 | + | 517698 | 518134 | 622648 |
| 64.te00031 | 14 | chr14_14.00388 | 1 | - | 557470 | 557778 | 622648 |
| 64.te00033 | 14 | chr14_14.00390 | 1 | + | 588046 | 588444 | 622648 |
| 64.te00009 | 14 | chr14_14.00357 | 2 | + | 19249  | 19731  | 622648 |
| 64.te00023 | 14 | chr14_14.00358 | 2 | + | 41476  | 41955  | 622648 |
| 64.te00036 | 14 | chr14_14.00359 | 2 | - | 95887  | 96425  | 622648 |
| 64.te00001 | 14 | chr14_14.00360 | 2 | + | 102801 | 103366 | 622648 |
| 64.te00002 | 14 | chr14_14.00361 | 2 | + | 107301 | 107837 | 622648 |
| 64.te00003 | 14 | chr14_14.00362 | 2 | + | 126809 | 127372 | 622648 |
| 64.te00004 | 14 | chr14_14.00363 | 2 | + | 130262 | 130820 | 622648 |
| 64.te00005 | 14 | chr14_14.00364 | 2 | + | 133710 | 134259 | 622648 |
| 64.te00006 | 14 | chr14_14.00365 | 2 | - | 154925 | 155447 | 622648 |
| 64.te00007 | 14 | chr14_14.00366 | 2 | + | 161405 | 161772 | 622648 |
| 64.te00008 | 14 | chr14_14.00367 | 2 | + | 164089 | 164625 | 622648 |
| 64.te00012 | 14 | chr14_14.00370 | 2 | - | 247019 | 247613 | 622648 |
| 64.te00013 | 14 | chr14_14.00371 | 2 | - | 249008 | 249602 | 622648 |
| 64.te00014 | 14 | chr14_14.00372 | 2 | - | 251982 | 252578 | 622648 |

|            |    |                |   |   |        |        |        |
|------------|----|----------------|---|---|--------|--------|--------|
| 64.te00015 | 14 | chr14_14.00373 | 2 | - | 253973 | 254541 | 622648 |
| 64.te00016 | 14 | chr14_14.00374 | 2 | + | 262560 | 263145 | 622648 |
| 64.te00020 | 14 | chr14_14.00378 | 2 | - | 382002 | 382620 | 622648 |
| 64.te00024 | 14 | chr14_14.00381 | 2 | - | 426472 | 426942 | 622648 |
| 64.te00027 | 14 | chr14_14.00384 | 2 | + | 523956 | 524546 | 622648 |
| 64.te00028 | 14 | chr14_14.00385 | 2 | + | 547284 | 547845 | 622648 |
| 64.te00029 | 14 | chr14_14.00386 | 2 | + | 550365 | 550952 | 622648 |
| 64.te00030 | 14 | chr14_14.00387 | 2 | - | 554546 | 555140 | 622648 |
| 64.te00032 | 14 | chr14_14.00389 | 2 | + | 578958 | 579466 | 622648 |
| 64.te00034 | 14 | chr14_14.00391 | 2 | - | 611654 | 612233 | 622648 |
| 64.te00035 | 14 | chr14_14.00392 | 2 | - | 620230 | 620799 | 622648 |
| 65.te00022 | 15 | chr15_15.00419 | 1 | - | 85998  | 86373  | 629514 |
| 65.te00010 | 15 | chr15_15.00426 | 1 | - | 344918 | 345130 | 629514 |
| 65.te00013 | 15 | chr15_15.00429 | 1 | - | 414872 | 415252 | 629514 |
| 65.te00016 | 15 | chr15_15.00431 | 1 | - | 509894 | 510253 | 629514 |
| 65.te00017 | 15 | chr15_15.00432 | 1 | - | 517507 | 518416 | 629514 |
| 65.te00023 | 15 | chr15_15.00413 | 2 | - | 9098   | 9693   | 629514 |
| 65.te00003 | 15 | chr15_15.00414 | 2 | - | 12378  | 12983  | 629514 |
| 65.te00004 | 15 | chr15_15.00415 | 2 | + | 21497  | 22088  | 629514 |
| 65.te00015 | 15 | chr15_15.00416 | 2 | + | 46101  | 46649  | 629514 |
| 65.te00020 | 15 | chr15_15.00417 | 2 | + | 76454  | 77032  | 629514 |
| 65.te00021 | 15 | chr15_15.00418 | 2 | - | 81012  | 81590  | 629514 |
| 65.te00002 | 15 | chr15_15.00420 | 2 | + | 106685 | 107238 | 629514 |
| 65.te00005 | 15 | chr15_15.00421 | 2 | + | 238388 | 238964 | 629514 |
| 65.te00006 | 15 | chr15_15.00422 | 2 | + | 256259 | 256750 | 629514 |
| 65.te00007 | 15 | chr15_15.00423 | 2 | + | 276550 | 277130 | 629514 |
| 65.te00008 | 15 | chr15_15.00424 | 2 | - | 325991 | 326265 | 629514 |
| 65.te00009 | 15 | chr15_15.00425 | 2 | - | 335122 | 335408 | 629514 |
| 65.te00011 | 15 | chr15_15.00427 | 2 | - | 385507 | 386114 | 629514 |
| 65.te00012 | 15 | chr15_15.00428 | 2 | - | 398393 | 399010 | 629514 |
| 65.te00014 | 15 | chr15_15.00430 | 2 | - | 452092 | 452696 | 629514 |
| 65.te00018 | 15 | chr15_15.00433 | 2 | - | 544503 | 545137 | 629514 |
| 65.te00019 | 15 | chr15_15.00434 | 2 | + | 568322 | 568955 | 629514 |
| 66.te00001 | 16 | chr16_16.00326 | 1 | - | 125441 | 126249 | 712836 |
| 66.te00005 | 16 | chr16_16.00330 | 1 | - | 177805 | 178269 | 712836 |
| 66.te00012 | 16 | chr16_16.00335 | 1 | + | 390926 | 391573 | 712836 |
| 66.te00015 | 16 | chr16_16.00337 | 1 | - | 436659 | 437333 | 712836 |
| 66.te00020 | 16 | chr16_16.00342 | 1 | - | 557489 | 558355 | 712836 |
| 66.te00023 | 16 | chr16_16.00344 | 1 | - | 610054 | 610497 | 712836 |
| 66.te00006 | 16 | chr16_16.00320 | 2 | - | 17433  | 18097  | 712836 |
| 66.te00009 | 16 | chr16_16.00321 | 2 | - | 21621  | 22251  | 712836 |
| 66.te00013 | 16 | chr16_16.00322 | 2 | - | 41098  | 41751  | 712836 |
| 66.te00021 | 16 | chr16_16.00323 | 2 | - | 61972  | 62583  | 712836 |
| 66.te00025 | 16 | chr16_16.00324 | 2 | - | 65701  | 66341  | 712836 |
| 66.te00027 | 16 | chr16_16.00325 | 2 | - | 85101  | 85779  | 712836 |
| 66.te00002 | 16 | chr16_16.00327 | 2 | - | 146657 | 147214 | 712836 |
| 66.te00003 | 16 | chr16_16.00328 | 2 | - | 152713 | 153043 | 712836 |
| 66.te00004 | 16 | chr16_16.00329 | 2 | - | 173286 | 173766 | 712836 |
| 66.te00007 | 16 | chr16_16.00331 | 2 | - | 192207 | 192555 | 712836 |
| 66.te00008 | 16 | chr16_16.00332 | 2 | + | 205806 | 206388 | 712836 |
| 66.te00010 | 16 | chr16_16.00333 | 2 | - | 268585 | 269168 | 712836 |
| 66.te00011 | 16 | chr16_16.00334 | 2 | - | 311080 | 311615 | 712836 |

|            |    |                |   |   |        |        |        |
|------------|----|----------------|---|---|--------|--------|--------|
| 66.te00014 | 16 | chr16_16.00336 | 2 | + | 415000 | 415533 | 712836 |
| 66.te00016 | 16 | chr16_16.00338 | 2 | - | 443854 | 444341 | 712836 |
| 66.te00017 | 16 | chr16_16.00339 | 2 | - | 446420 | 446764 | 712836 |
| 66.te00018 | 16 | chr16_16.00340 | 2 | - | 488538 | 488902 | 712836 |
| 66.te00019 | 16 | chr16_16.00341 | 2 | - | 556901 | 557467 | 712836 |
| 66.te00022 | 16 | chr16_16.00343 | 2 | - | 609510 | 610043 | 712836 |
| 66.te00024 | 16 | chr16_16.00345 | 2 | - | 617580 | 618167 | 712836 |
| 66.te00026 | 16 | chr16_16.00346 | 2 | - | 670679 | 671267 | 712836 |
| 67.te00030 | 17 | chr17_17.00370 | 1 | - | 29574  | 29686  | 684831 |
| 67.te00031 | 17 | chr17_17.00371 | 1 | - | 29698  | 30377  | 684831 |
| 67.te00032 | 17 | chr17_17.00372 | 1 | - | 30398  | 30626  | 684831 |
| 67.te00001 | 17 | chr17_17.00374 | 1 | + | 66603  | 66891  | 684831 |
| 67.te00007 | 17 | chr17_17.00380 | 1 | - | 175378 | 175990 | 684831 |
| 67.te00009 | 17 | chr17_17.00382 | 1 | + | 225154 | 225555 | 684831 |
| 67.te00010 | 17 | chr17_17.00383 | 1 | - | 251897 | 252086 | 684831 |
| 67.te00011 | 17 | chr17_17.00384 | 1 | - | 280067 | 280971 | 684831 |
| 67.te00012 | 17 | chr17_17.00385 | 1 | + | 281621 | 281861 | 684831 |
| 67.te00013 | 17 | chr17_17.00386 | 1 | + | 291610 | 291860 | 684831 |
| 67.te00023 | 17 | chr17_17.00396 | 1 | - | 375393 | 375617 | 684831 |
| 67.te00024 | 17 | chr17_17.00397 | 1 | + | 395850 | 396680 | 684831 |
| 67.te00026 | 17 | chr17_17.00399 | 1 | + | 428204 | 428665 | 684831 |
| 67.te00027 | 17 | chr17_17.00400 | 1 | + | 443642 | 444080 | 684831 |
| 67.te00029 | 17 | chr17_17.00402 | 1 | + | 494279 | 494621 | 684831 |
| 67.te00033 | 17 | chr17_17.00403 | 1 | - | 553745 | 554048 | 684831 |
| 67.te00035 | 17 | chr17_17.00405 | 1 | - | 590565 | 591033 | 684831 |
| 67.te00039 | 17 | chr17_17.00409 | 1 | + | 642116 | 642577 | 684831 |
| 67.te00041 | 17 | chr17_17.00373 | 2 | - | 41210  | 41915  | 684831 |
| 67.te00002 | 17 | chr17_17.00375 | 2 | - | 67465  | 68122  | 684831 |
| 67.te00003 | 17 | chr17_17.00376 | 2 | - | 131381 | 132033 | 684831 |
| 67.te00004 | 17 | chr17_17.00377 | 2 | + | 151403 | 152085 | 684831 |
| 67.te00005 | 17 | chr17_17.00378 | 2 | - | 159660 | 160329 | 684831 |
| 67.te00006 | 17 | chr17_17.00379 | 2 | - | 166702 | 167362 | 684831 |
| 67.te00008 | 17 | chr17_17.00381 | 2 | - | 219882 | 220569 | 684831 |
| 67.te00014 | 17 | chr17_17.00387 | 2 | + | 293266 | 293770 | 684831 |
| 67.te00015 | 17 | chr17_17.00388 | 2 | + | 296060 | 296575 | 684831 |
| 67.te00016 | 17 | chr17_17.00389 | 2 | + | 332671 | 333258 | 684831 |
| 67.te00017 | 17 | chr17_17.00390 | 2 | + | 344006 | 344582 | 684831 |
| 67.te00018 | 17 | chr17_17.00391 | 2 | + | 349525 | 350100 | 684831 |
| 67.te00019 | 17 | chr17_17.00392 | 2 | - | 354435 | 355018 | 684831 |
| 67.te00020 | 17 | chr17_17.00393 | 2 | + | 356934 | 357536 | 684831 |
| 67.te00021 | 17 | chr17_17.00394 | 2 | + | 357922 | 358491 | 684831 |
| 67.te00022 | 17 | chr17_17.00395 | 2 | - | 362703 | 363272 | 684831 |
| 67.te00025 | 17 | chr17_17.00398 | 2 | + | 399317 | 399891 | 684831 |
| 67.te00028 | 17 | chr17_17.00401 | 2 | + | 488944 | 489535 | 684831 |
| 67.te00034 | 17 | chr17_17.00404 | 2 | + | 564118 | 564681 | 684831 |
| 67.te00036 | 17 | chr17_17.00406 | 2 | + | 596393 | 597050 | 684831 |
| 67.te00037 | 17 | chr17_17.00407 | 2 | + | 607674 | 608225 | 684831 |
| 67.te00038 | 17 | chr17_17.00408 | 2 | + | 613777 | 614383 | 684831 |
| 67.te00040 | 17 | chr17_17.00410 | 2 | + | 644686 | 645249 | 684831 |
| 68.te00016 | 18 | chr18_18.00475 | 1 | - | 19558  | 20417  | 739751 |
| 68.te00030 | 18 | chr18_18.00476 | 1 | + | 42557  | 43000  | 739751 |
| 68.te00050 | 18 | chr18_18.00478 | 1 | - | 67010  | 67489  | 739751 |



|            |    |                |   |   |        |        |        |
|------------|----|----------------|---|---|--------|--------|--------|
| 68.te00061 | 18 | chr18_18.00480 | 1 | - | 81313  | 82172  | 739751 |
| 68.te00003 | 18 | chr18_18.00482 | 1 | + | 105000 | 105306 | 739751 |
| 68.te00005 | 18 | chr18_18.00484 | 1 | - | 111764 | 112026 | 739751 |
| 68.te00004 | 18 | chr18_18.00483 | 1 | + | 111793 | 112012 | 739751 |
| 68.te00009 | 18 | chr18_18.00488 | 1 | - | 159216 | 159620 | 739751 |
| 68.te00011 | 18 | chr18_18.00490 | 1 | - | 166287 | 166718 | 739751 |
| 68.te00013 | 18 | chr18_18.00492 | 1 | + | 175838 | 176072 | 739751 |
| 68.te00014 | 18 | chr18_18.00493 | 1 | + | 176075 | 177060 | 739751 |
| 68.te00015 | 18 | chr18_18.00494 | 1 | + | 177063 | 178036 | 739751 |
| 68.te00017 | 18 | chr18_18.00495 | 1 | - | 181889 | 182091 | 739751 |
| 68.te00020 | 18 | chr18_18.00498 | 1 | - | 238068 | 238586 | 739751 |
| 68.te00021 | 18 | chr18_18.00499 | 1 | + | 240836 | 241305 | 739751 |
| 68.te00022 | 18 | chr18_18.00500 | 1 | - | 247595 | 248007 | 739751 |
| 68.te00024 | 18 | chr18_18.00502 | 1 | - | 270762 | 271349 | 739751 |
| 68.te00025 | 18 | chr18_18.00503 | 1 | - | 273170 | 273838 | 739751 |
| 68.te00026 | 18 | chr18_18.00504 | 1 | - | 273984 | 274174 | 739751 |
| 68.te00027 | 18 | chr18_18.00505 | 1 | + | 292415 | 293357 | 739751 |
| 68.te00028 | 18 | chr18_18.00506 | 1 | - | 302577 | 302846 | 739751 |
| 68.te00031 | 18 | chr18_18.00508 | 1 | + | 422952 | 423163 | 739751 |
| 68.te00032 | 18 | chr18_18.00509 | 1 | - | 439147 | 439927 | 739751 |
| 68.te00033 | 18 | chr18_18.00510 | 1 | - | 439956 | 440523 | 739751 |
| 68.te00034 | 18 | chr18_18.00511 | 1 | - | 443110 | 443479 | 739751 |
| 68.te00037 | 18 | chr18_18.00514 | 1 | + | 472518 | 473458 | 739751 |
| 68.te00038 | 18 | chr18_18.00515 | 1 | + | 483898 | 484270 | 739751 |
| 68.te00039 | 18 | chr18_18.00516 | 1 | + | 485415 | 486150 | 739751 |
| 68.te00042 | 18 | chr18_18.00519 | 1 | + | 550979 | 551431 | 739751 |
| 68.te00047 | 18 | chr18_18.00523 | 1 | - | 582153 | 582412 | 739751 |
| 68.te00048 | 18 | chr18_18.00524 | 1 | + | 620243 | 621164 | 739751 |
| 68.te00049 | 18 | chr18_18.00525 | 1 | + | 632017 | 632484 | 739751 |
| 68.te00051 | 18 | chr18_18.00526 | 1 | - | 649838 | 650196 | 739751 |
| 68.te00052 | 18 | chr18_18.00527 | 1 | + | 658682 | 659362 | 739751 |
| 68.te00057 | 18 | chr18_18.00531 | 1 | - | 695048 | 695504 | 739751 |
| 68.te00058 | 18 | chr18_18.00532 | 1 | + | 709866 | 710322 | 739751 |
| 68.te00059 | 18 | chr18_18.00533 | 1 | + | 719589 | 719949 | 739751 |
| 68.te00060 | 18 | chr18_18.00534 | 1 | + | 721405 | 722121 | 739751 |
| 68.te00035 | 18 | chr18_18.00512 | 1 | - | 444955 | 445252 | 739751 |
| 68.te00044 | 18 | chr18_18.00477 | 2 | - | 58725  | 59293  | 739751 |
| 68.te00055 | 18 | chr18_18.00479 | 2 | - | 71794  | 72352  | 739751 |
| 68.te00062 | 18 | chr18_18.00481 | 2 | - | 99080  | 99640  | 739751 |
| 68.te00006 | 18 | chr18_18.00485 | 2 | + | 118822 | 119380 | 739751 |
| 68.te00007 | 18 | chr18_18.00486 | 2 | - | 128318 | 128598 | 739751 |
| 68.te00008 | 18 | chr18_18.00487 | 2 | - | 150605 | 151221 | 739751 |
| 68.te00010 | 18 | chr18_18.00489 | 2 | + | 165725 | 166279 | 739751 |
| 68.te00012 | 18 | chr18_18.00491 | 2 | - | 175103 | 175421 | 739751 |
| 68.te00018 | 18 | chr18_18.00496 | 2 | - | 214008 | 214562 | 739751 |
| 68.te00019 | 18 | chr18_18.00497 | 2 | - | 223035 | 223584 | 739751 |
| 68.te00023 | 18 | chr18_18.00501 | 2 | + | 269213 | 269747 | 739751 |
| 68.te00029 | 18 | chr18_18.00507 | 2 | + | 388438 | 388768 | 739751 |
| 68.te00036 | 18 | chr18_18.00513 | 2 | + | 470876 | 471461 | 739751 |
| 68.te00040 | 18 | chr18_18.00517 | 2 | + | 507957 | 508551 | 739751 |
| 68.te00041 | 18 | chr18_18.00518 | 2 | + | 541606 | 542115 | 739751 |
| 68.te00043 | 18 | chr18_18.00520 | 2 | + | 557091 | 557705 | 739751 |

|            |    |                |   |   |        |        |        |
|------------|----|----------------|---|---|--------|--------|--------|
| 68.te00045 | 18 | chr18_18.00521 | 2 | + | 564595 | 565191 | 739751 |
| 68.te00046 | 18 | chr18_18.00522 | 2 | + | 566376 | 566910 | 739751 |
| 68.te00053 | 18 | chr18_18.00528 | 2 | + | 677710 | 678253 | 739751 |
| 68.te00054 | 18 | chr18_18.00529 | 2 | + | 689554 | 690104 | 739751 |
| 68.te00056 | 18 | chr18_18.00530 | 2 | + | 692097 | 692700 | 739751 |
| 69.te00053 | 19 | chr19_40.00369 | 1 | + | 109911 | 110931 | 706761 |
| 69.te00056 | 19 | chr19_40.00372 | 1 | - | 174593 | 175517 | 706761 |
| 69.te00059 | 19 | chr19_40.00375 | 1 | + | 207429 | 208643 | 706761 |
| 69.te00062 | 19 | chr19_40.00378 | 1 | + | 225545 | 226414 | 706761 |
| 69.te00063 | 19 | chr19_40.00379 | 1 | + | 255613 | 255818 | 706761 |
| 69.te00064 | 19 | chr19_40.00380 | 1 | + | 263309 | 264016 | 706761 |
| 69.te00066 | 19 | chr19_40.00382 | 1 | + | 302798 | 303784 | 706761 |
| 69.te00068 | 19 | chr19_40.00384 | 1 | + | 332235 | 332514 | 706761 |
| 69.te00072 | 19 | chr19_40.00388 | 1 | + | 406234 | 406636 | 706761 |
| 69.te00073 | 19 | chr19_40.00389 | 1 | + | 406930 | 407217 | 706761 |
| 69.te00074 | 19 | chr19_40.00390 | 1 | + | 413791 | 414244 | 706761 |
| 69.te00075 | 19 | chr19_40.00391 | 1 | + | 428194 | 428477 | 706761 |
| 69.te00077 | 19 | chr19_40.00392 | 1 | + | 439916 | 440318 | 706761 |
| 69.te00078 | 19 | chr19_40.00393 | 1 | + | 441012 | 441693 | 706761 |
| 69.te00079 | 19 | chr19_40.00394 | 1 | + | 461582 | 462327 | 706761 |
| 69.te00082 | 19 | chr19_40.00397 | 1 | - | 529104 | 529416 | 706761 |
| 69.te00083 | 19 | chr19_40.00398 | 1 | - | 532416 | 532767 | 706761 |
| 69.te00089 | 19 | chr19_40.00402 | 1 | - | 592557 | 593386 | 706761 |
| 69.te00090 | 19 | chr19_40.00403 | 1 | - | 595998 | 596225 | 706761 |
| 69.te00092 | 19 | chr19_40.00405 | 1 | + | 607727 | 608543 | 706761 |
| 69.te00099 | 19 | chr19_40.00412 | 1 | + | 654772 | 655588 | 706761 |
| 69.te00100 | 19 | chr19_40.00413 | 1 | - | 662556 | 663371 | 706761 |
| 69.te00101 | 19 | chr19_40.00414 | 1 | - | 665750 | 666192 | 706761 |
| 69.te00065 | 19 | chr19_40.00381 | 1 | + | 296066 | 296465 | 706761 |
| 69.te00067 | 19 | chr19_40.00383 | 1 | + | 313019 | 313410 | 706761 |
| 69.te00069 | 19 | chr19_40.00385 | 1 | + | 362146 | 362537 | 706761 |
| 69.te00070 | 19 | chr19_40.00386 | 1 | + | 366714 | 367103 | 706761 |
| 69.te00076 | 19 | chr19_40.00365 | 2 | - | 42751  | 43331  | 706761 |
| 69.te00084 | 19 | chr19_40.00366 | 2 | - | 53647  | 54225  | 706761 |
| 69.te00087 | 19 | chr19_40.00367 | 2 | - | 58607  | 59190  | 706761 |
| 69.te00103 | 19 | chr19_40.00368 | 2 | + | 79903  | 80475  | 706761 |
| 69.te00054 | 19 | chr19_40.00370 | 2 | + | 114401 | 114994 | 706761 |
| 69.te00055 | 19 | chr19_40.00371 | 2 | + | 136805 | 137406 | 706761 |
| 69.te00057 | 19 | chr19_40.00373 | 2 | + | 182584 | 183193 | 706761 |
| 69.te00058 | 19 | chr19_40.00374 | 2 | + | 204783 | 205286 | 706761 |
| 69.te00060 | 19 | chr19_40.00376 | 2 | + | 208660 | 209227 | 706761 |
| 69.te00061 | 19 | chr19_40.00377 | 2 | + | 219990 | 220486 | 706761 |
| 69.te00071 | 19 | chr19_40.00387 | 2 | - | 375779 | 376219 | 706761 |
| 69.te00080 | 19 | chr19_40.00395 | 2 | + | 522239 | 522591 | 706761 |
| 69.te00081 | 19 | chr19_40.00396 | 2 | + | 524770 | 525079 | 706761 |
| 69.te00085 | 19 | chr19_40.00399 | 2 | + | 570293 | 570570 | 706761 |
| 69.te00086 | 19 | chr19_40.00400 | 2 | + | 576587 | 576946 | 706761 |
| 69.te00088 | 19 | chr19_40.00401 | 2 | + | 591917 | 592521 | 706761 |
| 69.te00091 | 19 | chr19_40.00404 | 2 | + | 602067 | 602633 | 706761 |
| 69.te00093 | 19 | chr19_40.00406 | 2 | + | 608565 | 609148 | 706761 |
| 69.te00094 | 19 | chr19_40.00407 | 2 | - | 616010 | 616684 | 706761 |
| 69.te00095 | 19 | chr19_40.00408 | 2 | + | 631009 | 631597 | 706761 |

|            |    |                |   |   |        |        |        |
|------------|----|----------------|---|---|--------|--------|--------|
| 69.te00096 | 19 | chr19_40.00409 | 2 | + | 641365 | 641950 | 706761 |
| 69.te00097 | 19 | chr19_40.00410 | 2 | + | 646975 | 647530 | 706761 |
| 69.te00098 | 19 | chr19_40.00411 | 2 | + | 652582 | 653163 | 706761 |
| 69.te00102 | 19 | chr19_40.00415 | 2 | + | 705334 | 705859 | 706761 |
| 70.te00027 | 20 | chr20_20.00403 | 1 | - | 46251  | 46704  | 742551 |
| 70.te00010 | 20 | chr20_20.00409 | 1 | + | 157351 | 157867 | 742551 |
| 70.te00014 | 20 | chr20_20.00412 | 1 | + | 201292 | 201762 | 742551 |
| 70.te00013 | 20 | chr20_20.00413 | 1 | + | 205458 | 206309 | 742551 |
| 70.te00015 | 20 | chr20_20.00415 | 1 | + | 268800 | 269651 | 742551 |
| 70.te00018 | 20 | chr20_20.00416 | 1 | + | 289265 | 289735 | 742551 |
| 70.te00019 | 20 | chr20_20.00417 | 1 | + | 293425 | 294298 | 742551 |
| 70.te00021 | 20 | chr20_20.00419 | 1 | + | 359654 | 359898 | 742551 |
| 70.te00025 | 20 | chr20_20.00422 | 1 | + | 436474 | 437308 | 742551 |
| 70.te00036 | 20 | chr20_20.00431 | 1 | + | 561827 | 562229 | 742551 |
| 70.te00038 | 20 | chr20_20.00433 | 1 | + | 622286 | 623153 | 742551 |
| 70.te00039 | 20 | chr20_20.00434 | 1 | - | 662627 | 663297 | 742551 |
| 70.te00040 | 20 | chr20_20.00435 | 1 | - | 664452 | 664827 | 742551 |
| 70.te00009 | 20 | chr20_20.00399 | 2 | - | 2155   | 2728   | 742551 |
| 70.te00005 | 20 | chr20_20.00400 | 2 | - | 11739  | 12316  | 742551 |
| 70.te00017 | 20 | chr20_20.00401 | 2 | - | 26374  | 26959  | 742551 |
| 70.te00022 | 20 | chr20_20.00402 | 2 | - | 38486  | 39069  | 742551 |
| 70.te00033 | 20 | chr20_20.00404 | 2 | - | 55971  | 56180  | 742551 |
| 70.te00004 | 20 | chr20_20.00405 | 2 | + | 104874 | 105475 | 742551 |
| 70.te00006 | 20 | chr20_20.00406 | 2 | - | 112621 | 113218 | 742551 |
| 70.te00007 | 20 | chr20_20.00407 | 2 | + | 121465 | 122050 | 742551 |
| 70.te00008 | 20 | chr20_20.00408 | 2 | + | 130915 | 131467 | 742551 |
| 70.te00011 | 20 | chr20_20.00410 | 2 | + | 164449 | 164995 | 742551 |
| 70.te00012 | 20 | chr20_20.00411 | 2 | - | 199885 | 200314 | 742551 |
| 70.te00016 | 20 | chr20_20.00414 | 2 | - | 235047 | 235639 | 742551 |
| 70.te00020 | 20 | chr20_20.00418 | 2 | + | 333260 | 333653 | 742551 |
| 70.te00023 | 20 | chr20_20.00420 | 2 | + | 416941 | 417433 | 742551 |
| 70.te00024 | 20 | chr20_20.00421 | 2 | - | 431267 | 431864 | 742551 |
| 70.te00026 | 20 | chr20_20.00423 | 2 | + | 439605 | 440167 | 742551 |
| 70.te00028 | 20 | chr20_20.00424 | 2 | + | 445982 | 446560 | 742551 |
| 70.te00029 | 20 | chr20_20.00425 | 2 | - | 479883 | 480362 | 742551 |
| 70.te00030 | 20 | chr20_20.00426 | 2 | - | 506573 | 506919 | 742551 |
| 70.te00031 | 20 | chr20_20.00427 | 2 | - | 511598 | 512160 | 742551 |
| 70.te00032 | 20 | chr20_20.00428 | 2 | + | 514178 | 514691 | 742551 |
| 70.te00034 | 20 | chr20_20.00429 | 2 | + | 532066 | 532532 | 742551 |
| 70.te00035 | 20 | chr20_20.00430 | 2 | + | 538873 | 539340 | 742551 |
| 70.te00037 | 20 | chr20_20.00432 | 2 | + | 563911 | 564433 | 742551 |
| 70.te00042 | 20 | chr20_20.00437 | 2 | - | 668761 | 669319 | 742551 |
| 70.te00041 | 20 | chr20_20.00436 | 2 | - | 668766 | 668989 | 742551 |
| 71.te00013 | 21 | chr21_21.00347 | 1 | + | 42985  | 43731  | 749309 |
| 71.te00015 | 21 | chr21_21.00363 | 1 | - | 394101 | 395047 | 749309 |
| 71.te00024 | 21 | chr21_21.00372 | 1 | - | 506318 | 506778 | 749309 |
| 71.te00027 | 21 | chr21_21.00375 | 1 | - | 566908 | 567805 | 749309 |
| 71.te00010 | 21 | chr21_21.00357 | 1 | + | 238844 | 239435 | 749309 |
| 71.te00002 | 21 | chr21_21.00345 | 2 | + | 15089  | 15577  | 749309 |
| 71.te00004 | 21 | chr21_21.00346 | 2 | + | 17049  | 17442  | 749309 |
| 71.te00014 | 21 | chr21_21.00348 | 2 | + | 43754  | 44266  | 749309 |
| 71.te00031 | 21 | chr21_21.00349 | 2 | + | 81613  | 81836  | 749309 |

|            |    |                |   |   |        |        |        |
|------------|----|----------------|---|---|--------|--------|--------|
| 71.te00001 | 21 | chr21_21.00350 | 2 | + | 100469 | 101065 | 749309 |
| 71.te00003 | 21 | chr21_21.00351 | 2 | - | 159460 | 160039 | 749309 |
| 71.te00005 | 21 | chr21_21.00352 | 2 | - | 191908 | 192445 | 749309 |
| 71.te00006 | 21 | chr21_21.00353 | 2 | - | 197875 | 198382 | 749309 |
| 71.te00007 | 21 | chr21_21.00354 | 2 | - | 215161 | 215434 | 749309 |
| 71.te00008 | 21 | chr21_21.00355 | 2 | - | 219070 | 219602 | 749309 |
| 71.te00009 | 21 | chr21_21.00356 | 2 | + | 223027 | 223557 | 749309 |
| 71.te00011 | 21 | chr21_21.00358 | 2 | - | 245183 | 245792 | 749309 |
| 71.te00012 | 21 | chr21_21.00359 | 2 | + | 262503 | 263177 | 749309 |
| 71.te00016 | 21 | chr21_21.00360 | 2 | + | 277871 | 278405 | 749309 |
| 71.te00017 | 21 | chr21_21.00361 | 2 | - | 301173 | 301740 | 749309 |
| 71.te00018 | 21 | chr21_21.00362 | 2 | + | 302330 | 302784 | 749309 |
| 71.te00019 | 21 | chr21_21.00364 | 2 | - | 438091 | 438722 | 749309 |
| 71.te00020 | 21 | chr21_21.00365 | 2 | - | 459551 | 460062 | 749309 |
| 71.te00021 | 21 | chr21_21.00366 | 2 | + | 467263 | 467764 | 749309 |
| 71.te00022 | 21 | chr21_21.00367 | 2 | - | 487019 | 487587 | 749309 |
| 71.te00023 | 21 | chr21_21.00368 | 2 | - | 492347 | 492937 | 749309 |
| 71.te00025 | 21 | chr21_21.00369 | 2 | - | 495674 | 496186 | 749309 |
| 71.te00026 | 21 | chr21_21.00370 | 2 | - | 499315 | 499730 | 749309 |
| 71.te00028 | 21 | chr21_21.00371 | 2 | - | 502767 | 503270 | 749309 |
| 71.te00029 | 21 | chr21_21.00373 | 2 | - | 507040 | 507683 | 749309 |
| 71.te00030 | 21 | chr21_21.00374 | 2 | - | 550130 | 550839 | 749309 |
| 72.te00037 | 21 | chr21_21.00376 | 2 | - | 576042 | 576651 | 749309 |
| 72.te00008 | 21 | chr21_21.00377 | 2 | - | 599894 | 600447 | 749309 |
| 72.te00048 | 21 | chr21_21.00378 | 2 | + | 613034 | 613593 | 749309 |
| 72.te00045 | 22 | chr22_22.00421 | 1 | - | 64770  | 65469  | 716396 |
| 72.te00049 | 22 | chr22_22.00423 | 1 | - | 69384  | 69970  | 716396 |
| 72.te00001 | 22 | chr22_22.00425 | 1 | - | 107309 | 107797 | 716396 |
| 72.te00004 | 22 | chr22_22.00428 | 1 | + | 186508 | 186858 | 716396 |
| 72.te00006 | 22 | chr22_22.00430 | 1 | + | 194324 | 194569 | 716396 |
| 72.te00007 | 22 | chr22_22.00431 | 1 | - | 225446 | 225908 | 716396 |
| 72.te00010 | 22 | chr22_22.00433 | 1 | - | 266045 | 266524 | 716396 |
| 72.te00011 | 22 | chr22_22.00434 | 1 | - | 267077 | 267986 | 716396 |
| 72.te00012 | 22 | chr22_22.00435 | 1 | - | 285345 | 286323 | 716396 |
| 72.te00014 | 22 | chr22_22.00437 | 1 | - | 290086 | 291063 | 716396 |
| 72.te00016 | 22 | chr22_22.00439 | 1 | - | 299444 | 300432 | 716396 |
| 72.te00019 | 22 | chr22_22.00442 | 1 | + | 327613 | 328077 | 716396 |
| 72.te00020 | 22 | chr22_22.00443 | 1 | + | 329543 | 330005 | 716396 |
| 72.te00021 | 22 | chr22_22.00444 | 1 | + | 342062 | 342955 | 716396 |
| 72.te00022 | 22 | chr22_22.00445 | 1 | + | 343521 | 344093 | 716396 |
| 72.te00025 | 22 | chr22_22.00448 | 1 | + | 387892 | 388610 | 716396 |
| 72.te00027 | 22 | chr22_22.00450 | 1 | - | 407106 | 407278 | 716396 |
| 72.te00028 | 22 | chr22_22.00451 | 1 | - | 415272 | 415661 | 716396 |
| 72.te00029 | 22 | chr22_22.00452 | 1 | + | 423583 | 423913 | 716396 |
| 72.te00030 | 22 | chr22_22.00453 | 1 | + | 434142 | 434391 | 716396 |
| 72.te00031 | 22 | chr22_22.00454 | 1 | + | 498125 | 498388 | 716396 |
| 72.te00034 | 22 | chr22_22.00457 | 1 | + | 537292 | 537743 | 716396 |
| 72.te00036 | 22 | chr22_22.00459 | 1 | + | 572164 | 572406 | 716396 |
| 72.te00038 | 22 | chr22_22.00460 | 1 | - | 593317 | 594162 | 716396 |
| 72.te00039 | 22 | chr22_22.00461 | 1 | - | 594310 | 594551 | 716396 |
| 72.te00040 | 22 | chr22_22.00462 | 1 | - | 601320 | 601764 | 716396 |
| 72.te00046 | 22 | chr22_22.00467 | 1 | + | 661356 | 662231 | 716396 |

|            |    |                |   |   |        |        |        |
|------------|----|----------------|---|---|--------|--------|--------|
| 72.te00050 | 22 | chr22_22.00419 | 2 | - | 5469   | 5991   | 716396 |
| 72.te00002 | 22 | chr22_22.00420 | 2 | - | 23296  | 23866  | 716396 |
| 72.te00003 | 22 | chr22_22.00422 | 2 | - | 68911  | 69374  | 716396 |
| 72.te00005 | 22 | chr22_22.00424 | 2 | - | 97321  | 97922  | 716396 |
| 72.te00009 | 22 | chr22_22.00426 | 2 | - | 164599 | 165040 | 716396 |
| 72.te00013 | 22 | chr22_22.00427 | 2 | - | 183666 | 184278 | 716396 |
| 72.te00015 | 22 | chr22_22.00429 | 2 | - | 190017 | 190612 | 716396 |
| 72.te00017 | 22 | chr22_22.00432 | 2 | - | 262104 | 262675 | 716396 |
| 72.te00018 | 22 | chr22_22.00436 | 2 | - | 287580 | 288152 | 716396 |
| 72.te00023 | 22 | chr22_22.00438 | 2 | - | 298059 | 298655 | 716396 |
| 72.te00024 | 22 | chr22_22.00440 | 2 | - | 314595 | 315136 | 716396 |
| 72.te00026 | 22 | chr22_22.00441 | 2 | + | 322697 | 323240 | 716396 |
| 72.te00032 | 22 | chr22_22.00446 | 2 | + | 347366 | 347960 | 716396 |
| 72.te00033 | 22 | chr22_22.00447 | 2 | + | 370754 | 370964 | 716396 |
| 72.te00035 | 22 | chr22_22.00449 | 2 | + | 397279 | 397766 | 716396 |
| 72.te00041 | 22 | chr22_22.00455 | 2 | - | 517103 | 517676 | 716396 |
| 72.te00042 | 22 | chr22_22.00456 | 2 | - | 529999 | 530621 | 716396 |
| 72.te00043 | 22 | chr22_22.00458 | 2 | - | 538289 | 538904 | 716396 |
| 72.te00044 | 22 | chr22_22.00463 | 2 | + | 606571 | 607008 | 716396 |
| 72.te00047 | 22 | chr22_22.00464 | 2 | - | 607890 | 608213 | 716396 |
| 73.te00059 | 22 | chr22_22.00465 | 2 | + | 620165 | 620612 | 716396 |
| 73.te00079 | 22 | chr22_22.00466 | 2 | + | 639645 | 639949 | 716396 |
| 73.te00024 | 22 | chr22_22.00468 | 2 | + | 690180 | 690751 | 716396 |
| 73.te00063 | 23 | chr23_23.00324 | 1 | - | 61067  | 61566  | 772562 |
| 73.te00070 | 23 | chr23_23.00325 | 1 | - | 72192  | 72429  | 772562 |
| 73.te00074 | 23 | chr23_23.00326 | 1 | + | 79077  | 79334  | 772562 |
| 73.te00075 | 23 | chr23_23.00327 | 1 | + | 79834  | 80684  | 772562 |
| 73.te00076 | 23 | chr23_23.00328 | 1 | - | 84716  | 85540  | 772562 |
| 73.te00077 | 23 | chr23_23.00329 | 1 | - | 86061  | 86318  | 772562 |
| 73.te00078 | 23 | chr23_23.00330 | 1 | + | 87874  | 88031  | 772562 |
| 73.te00080 | 23 | chr23_23.00332 | 1 | - | 98678  | 99532  | 772562 |
| 73.te00025 | 23 | chr23_23.00334 | 1 | - | 100029 | 100212 | 772562 |
| 73.te00028 | 23 | chr23_23.00337 | 1 | + | 158260 | 158407 | 772562 |
| 73.te00031 | 23 | chr23_23.00340 | 1 | - | 173001 | 173500 | 772562 |
| 73.te00032 | 23 | chr23_23.00341 | 1 | - | 193006 | 193829 | 772562 |
| 73.te00033 | 23 | chr23_23.00342 | 1 | - | 193903 | 194087 | 772562 |
| 73.te00037 | 23 | chr23_23.00343 | 1 | - | 199734 | 200550 | 772562 |
| 73.te00040 | 23 | chr23_23.00346 | 1 | - | 251409 | 252159 | 772562 |
| 73.te00041 | 23 | chr23_23.00347 | 1 | - | 281255 | 282086 | 772562 |
| 73.te00045 | 23 | chr23_23.00351 | 1 | - | 325642 | 326465 | 772562 |
| 73.te00050 | 23 | chr23_23.00356 | 1 | + | 430428 | 430868 | 772562 |
| 73.te00052 | 23 | chr23_23.00358 | 1 | - | 451694 | 451990 | 772562 |
| 73.te00053 | 23 | chr23_23.00359 | 1 | - | 457828 | 458124 | 772562 |
| 73.te00064 | 23 | chr23_23.00368 | 1 | - | 577350 | 577968 | 772562 |
| 73.te00067 | 23 | chr23_23.00371 | 1 | - | 601208 | 601620 | 772562 |
| 73.te00072 | 23 | chr23_23.00375 | 1 | + | 666926 | 667910 | 772562 |
| 73.te00030 | 23 | chr23_23.00339 | 1 | + | 172240 | 172590 | 772562 |
| 73.te00046 | 23 | chr23_23.00352 | 1 | - | 354623 | 355141 | 772562 |
| 73.te00048 | 23 | chr23_23.00354 | 1 | - | 385727 | 386283 | 772562 |
| 73.te00049 | 23 | chr23_23.00355 | 1 | - | 390740 | 391299 | 772562 |
| 73.te00051 | 23 | chr23_23.00357 | 1 | - | 442038 | 442570 | 772562 |
| 73.te00026 | 23 | chr23_23.00323 | 2 | + | 56186  | 56791  | 772562 |

|            |    |                |   |   |        |        |        |
|------------|----|----------------|---|---|--------|--------|--------|
| 73.te00027 | 23 | chr23_23.00331 | 2 | + | 89519  | 90051  | 772562 |
| 73.te00029 | 23 | chr23_23.00333 | 2 | + | 100172 | 100701 | 772562 |
| 73.te00034 | 23 | chr23_23.00335 | 2 | - | 117324 | 117920 | 772562 |
| 73.te00035 | 23 | chr23_23.00336 | 2 | + | 124342 | 124924 | 772562 |
| 73.te00036 | 23 | chr23_23.00338 | 2 | + | 161360 | 161928 | 772562 |
| 73.te00038 | 23 | chr23_23.00344 | 2 | - | 215862 | 216500 | 772562 |
| 73.te00039 | 23 | chr23_23.00345 | 2 | - | 249917 | 250427 | 772562 |
| 73.te00042 | 23 | chr23_23.00348 | 2 | - | 293556 | 294152 | 772562 |
| 73.te00043 | 23 | chr23_23.00349 | 2 | - | 300012 | 300633 | 772562 |
| 73.te00044 | 23 | chr23_23.00350 | 2 | - | 321659 | 322237 | 772562 |
| 73.te00047 | 23 | chr23_23.00353 | 2 | - | 369780 | 370338 | 772562 |
| 73.te00054 | 23 | chr23_23.00360 | 2 | - | 472891 | 473480 | 772562 |
| 73.te00055 | 23 | chr23_23.00361 | 2 | + | 480099 | 480534 | 772562 |
| 73.te00056 | 23 | chr23_23.00362 | 2 | - | 484821 | 485393 | 772562 |
| 73.te00057 | 23 | chr23_23.00363 | 2 | + | 494625 | 495201 | 772562 |
| 73.te00058 | 23 | chr23_23.00364 | 2 | + | 498383 | 498817 | 772562 |
| 73.te00060 | 23 | chr23_23.00365 | 2 | - | 504034 | 504603 | 772562 |
| 73.te00061 | 23 | chr23_23.00366 | 2 | + | 508961 | 509437 | 772562 |
| 73.te00062 | 23 | chr23_23.00367 | 2 | + | 543192 | 543769 | 772562 |
| 73.te00065 | 23 | chr23_23.00369 | 2 | + | 596497 | 597082 | 772562 |
| 73.te00066 | 23 | chr23_23.00370 | 2 | + | 600619 | 601200 | 772562 |
| 73.te00068 | 23 | chr23_23.00372 | 2 | + | 617250 | 617803 | 772562 |
| 73.te00069 | 23 | chr23_23.00373 | 2 | - | 627044 | 627625 | 772562 |
| 73.te00071 | 23 | chr23_23.00374 | 2 | - | 642001 | 642584 | 772562 |
| 73.te00073 | 23 | chr23_23.00376 | 2 | + | 675721 | 676287 | 772562 |
| 74.te00011 | 24 | chr24_24.00471 | 1 | + | 110126 | 110812 | 840950 |
| 74.te00015 | 24 | chr24_24.00475 | 1 | + | 143846 | 144172 | 840950 |
| 74.te00019 | 24 | chr24_24.00479 | 1 | + | 238753 | 239008 | 840950 |
| 74.te00023 | 24 | chr24_24.00482 | 1 | + | 282124 | 282381 | 840950 |
| 74.te00037 | 24 | chr24_24.00495 | 1 | + | 526280 | 526683 | 840950 |
| 74.te00038 | 24 | chr24_24.00496 | 1 | + | 526761 | 527419 | 840950 |
| 74.te00039 | 24 | chr24_24.00497 | 1 | + | 591753 | 592168 | 840950 |
| 74.te00040 | 24 | chr24_24.00498 | 1 | + | 592177 | 592903 | 840950 |
| 74.te00020 | 24 | chr24_24.00468 | 2 | + | 26522  | 27071  | 840950 |
| 74.te00025 | 24 | chr24_24.00469 | 2 | + | 30986  | 31534  | 840950 |
| 74.te00053 | 24 | chr24_24.00470 | 2 | + | 92090  | 92551  | 840950 |
| 74.te00012 | 24 | chr24_24.00472 | 2 | + | 112729 | 113337 | 840950 |
| 74.te00013 | 24 | chr24_24.00473 | 2 | + | 125637 | 126194 | 840950 |
| 74.te00014 | 24 | chr24_24.00474 | 2 | + | 132095 | 132549 | 840950 |
| 74.te00016 | 24 | chr24_24.00476 | 2 | + | 144748 | 145186 | 840950 |
| 74.te00017 | 24 | chr24_24.00477 | 2 | + | 150915 | 151326 | 840950 |
| 74.te00018 | 24 | chr24_24.00478 | 2 | - | 186799 | 187326 | 840950 |
| 74.te00021 | 24 | chr24_24.00480 | 2 | + | 269010 | 269498 | 840950 |
| 74.te00022 | 24 | chr24_24.00481 | 2 | + | 274618 | 275143 | 840950 |
| 74.te00024 | 24 | chr24_24.00483 | 2 | + | 293910 | 294561 | 840950 |
| 74.te00026 | 24 | chr24_24.00484 | 2 | + | 377312 | 377910 | 840950 |
| 74.te00027 | 24 | chr24_24.00485 | 2 | + | 416823 | 417316 | 840950 |
| 74.te00028 | 24 | chr24_24.00486 | 2 | + | 419118 | 419746 | 840950 |
| 74.te00029 | 24 | chr24_24.00487 | 2 | + | 448082 | 448605 | 840950 |
| 74.te00030 | 24 | chr24_24.00488 | 2 | + | 450522 | 451041 | 840950 |
| 74.te00031 | 24 | chr24_24.00489 | 2 | - | 452228 | 452814 | 840950 |
| 74.te00032 | 24 | chr24_24.00490 | 2 | + | 469351 | 469819 | 840950 |

|            |    |                |   |   |        |        |         |
|------------|----|----------------|---|---|--------|--------|---------|
| 74.te00033 | 24 | chr24_24.00491 | 2 | + | 481168 | 481707 | 840950  |
| 74.te00034 | 24 | chr24_24.00492 | 2 | + | 486269 | 486813 | 840950  |
| 74.te00035 | 24 | chr24_24.00493 | 2 | + | 496012 | 496624 | 840950  |
| 74.te00036 | 24 | chr24_24.00494 | 2 | - | 524737 | 525394 | 840950  |
| 74.te00041 | 24 | chr24_24.00499 | 2 | - | 619930 | 620558 | 840950  |
| 74.te00042 | 24 | chr24_24.00500 | 2 | + | 622039 | 622536 | 840950  |
| 74.te00043 | 24 | chr24_24.00501 | 2 | - | 639088 | 639749 | 840950  |
| 74.te00044 | 24 | chr24_24.00502 | 2 | - | 659569 | 660077 | 840950  |
| 74.te00045 | 24 | chr24_24.00503 | 2 | - | 681344 | 681923 | 840950  |
| 74.te00046 | 24 | chr24_24.00504 | 2 | - | 692190 | 692744 | 840950  |
| 74.te00047 | 24 | chr24_24.00505 | 2 | - | 706382 | 706928 | 840950  |
| 74.te00048 | 24 | chr24_24.00506 | 2 | - | 723671 | 724244 | 840950  |
| 74.te00049 | 24 | chr24_24.00507 | 2 | + | 752116 | 752672 | 840950  |
| 74.te00050 | 24 | chr24_24.00508 | 2 | + | 756482 | 757052 | 840950  |
| 74.te00051 | 24 | chr24_24.00509 | 2 | - | 762444 | 763011 | 840950  |
| 74.te00052 | 24 | chr24_24.00510 | 2 | + | 783205 | 783829 | 840950  |
| 75.te00006 | 25 | chr25_25.00550 | 1 | + | 289383 | 289611 | 912849  |
| 75.te00012 | 25 | chr25_25.00554 | 1 | + | 412377 | 412954 | 912849  |
| 75.te00013 | 25 | chr25_25.00555 | 1 | - | 451337 | 451769 | 912849  |
| 75.te00028 | 25 | chr25_25.00568 | 1 | - | 777499 | 777947 | 912849  |
| 75.te00036 | 25 | chr25_25.00575 | 1 | + | 889299 | 889766 | 912849  |
| 75.te00009 | 25 | chr25_25.00542 | 2 | - | 32565  | 33145  | 912849  |
| 75.te00019 | 25 | chr25_25.00543 | 2 | - | 57543  | 58121  | 912849  |
| 75.te00024 | 25 | chr25_25.00544 | 2 | - | 65538  | 66118  | 912849  |
| 75.te00001 | 25 | chr25_25.00545 | 2 | + | 109701 | 110256 | 912849  |
| 75.te00002 | 25 | chr25_25.00546 | 2 | + | 125700 | 125982 | 912849  |
| 75.te00003 | 25 | chr25_25.00547 | 2 | - | 233524 | 234097 | 912849  |
| 75.te00004 | 25 | chr25_25.00548 | 2 | + | 262199 | 262762 | 912849  |
| 75.te00005 | 25 | chr25_25.00549 | 2 | + | 270781 | 271285 | 912849  |
| 75.te00007 | 25 | chr25_25.00551 | 2 | - | 308712 | 309295 | 912849  |
| 75.te00008 | 25 | chr25_25.00552 | 2 | + | 321696 | 322299 | 912849  |
| 75.te00011 | 25 | chr25_25.00553 | 2 | - | 398055 | 398583 | 912849  |
| 75.te00014 | 25 | chr25_25.00556 | 2 | - | 520930 | 521535 | 912849  |
| 75.te00015 | 25 | chr25_25.00557 | 2 | + | 534409 | 534839 | 912849  |
| 75.te00016 | 25 | chr25_25.00558 | 2 | - | 554083 | 554691 | 912849  |
| 75.te00017 | 25 | chr25_25.00559 | 2 | - | 570841 | 571407 | 912849  |
| 75.te00018 | 25 | chr25_25.00560 | 2 | - | 577720 | 578313 | 912849  |
| 75.te00020 | 25 | chr25_25.00561 | 2 | - | 584160 | 584747 | 912849  |
| 75.te00021 | 25 | chr25_25.00562 | 2 | - | 586538 | 587102 | 912849  |
| 75.te00022 | 25 | chr25_25.00563 | 2 | - | 589152 | 589720 | 912849  |
| 75.te00023 | 25 | chr25_25.00564 | 2 | - | 615870 | 616470 | 912849  |
| 75.te00025 | 25 | chr25_25.00565 | 2 | - | 681627 | 682004 | 912849  |
| 75.te00026 | 25 | chr25_25.00566 | 2 | + | 699382 | 699752 | 912849  |
| 75.te00027 | 25 | chr25_25.00567 | 2 | + | 776916 | 777484 | 912849  |
| 75.te00029 | 25 | chr25_25.00569 | 2 | - | 822046 | 822625 | 912849  |
| 75.te00030 | 25 | chr25_25.00570 | 2 | - | 827036 | 827255 | 912849  |
| 75.te00031 | 25 | chr25_25.00571 | 2 | - | 847590 | 848198 | 912849  |
| 75.te00032 | 25 | chr25_25.00572 | 2 | + | 855093 | 855699 | 912849  |
| 75.te00034 | 25 | chr25_25.00573 | 2 | + | 875552 | 876172 | 912849  |
| 75.te00035 | 25 | chr25_25.00574 | 2 | + | 887796 | 888416 | 912849  |
| 76.te00056 | 26 | chr26_26.00515 | 1 | - | 9549   | 10013  | 1091579 |
| 76.te00111 | 26 | chr26_26.00519 | 1 | - | 93040  | 93289  | 1091579 |

|            |    |                |   |   |         |         |         |
|------------|----|----------------|---|---|---------|---------|---------|
| 76.te00066 | 26 | chr26_26.00521 | 1 | - | 112411  | 113020  | 1091579 |
| 76.te00067 | 26 | chr26_26.00522 | 1 | - | 118791  | 118991  | 1091579 |
| 76.te00070 | 26 | chr26_26.00525 | 1 | - | 204180  | 204417  | 1091579 |
| 76.te00073 | 26 | chr26_26.00528 | 1 | + | 233711  | 234257  | 1091579 |
| 76.te00078 | 26 | chr26_26.00532 | 1 | - | 387783  | 388154  | 1091579 |
| 76.te00079 | 26 | chr26_26.00533 | 1 | - | 450333  | 450577  | 1091579 |
| 76.te00082 | 26 | chr26_26.00535 | 1 | + | 500293  | 500732  | 1091579 |
| 76.te00084 | 26 | chr26_26.00537 | 1 | + | 520607  | 521312  | 1091579 |
| 76.te00090 | 26 | chr26_26.00542 | 1 | + | 574037  | 574502  | 1091579 |
| 76.te00101 | 26 | chr26_26.00553 | 1 | + | 734771  | 734990  | 1091579 |
| 76.te00105 | 26 | chr26_26.00557 | 1 | + | 775846  | 776072  | 1091579 |
| 76.te00106 | 26 | chr26_26.00558 | 1 | + | 776440  | 777178  | 1091579 |
| 76.te00107 | 26 | chr26_26.00559 | 1 | + | 783995  | 784136  | 1091579 |
| 76.te00057 | 26 | chr26_26.00563 | 1 | + | 1019165 | 1019608 | 1091579 |
| 76.te00059 | 26 | chr26_26.00565 | 1 | + | 1024261 | 1025024 | 1091579 |
| 76.te00060 | 26 | chr26_26.00566 | 1 | + | 1035808 | 1036557 | 1091579 |
| 76.te00063 | 26 | chr26_26.00568 | 1 | + | 1060081 | 1060859 | 1091579 |
| 76.te00065 | 26 | chr26_26.00570 | 1 | - | 1083956 | 1084152 | 1091579 |
| 76.te00071 | 26 | chr26_26.00526 | 1 | - | 214571  | 215234  | 1091579 |
| 76.te00072 | 26 | chr26_26.00527 | 1 | + | 232689  | 233153  | 1091579 |
| 76.te00074 | 26 | chr26_26.00529 | 1 | - | 240295  | 240702  | 1091579 |
| 76.te00076 | 26 | chr26_26.00516 | 2 | - | 36182   | 36861   | 1091579 |
| 76.te00080 | 26 | chr26_26.00517 | 2 | - | 47540   | 48216   | 1091579 |
| 76.te00085 | 26 | chr26_26.00518 | 2 | - | 51644   | 52284   | 1091579 |
| 76.te00062 | 26 | chr26_26.00520 | 2 | - | 104237  | 104830  | 1091579 |
| 76.te00068 | 26 | chr26_26.00523 | 2 | - | 129712  | 130345  | 1091579 |
| 76.te00069 | 26 | chr26_26.00524 | 2 | - | 172460  | 173037  | 1091579 |
| 76.te00075 | 26 | chr26_26.00530 | 2 | - | 276370  | 276964  | 1091579 |
| 76.te00077 | 26 | chr26_26.00531 | 2 | + | 372038  | 372655  | 1091579 |
| 76.te00081 | 26 | chr26_26.00534 | 2 | + | 482333  | 482927  | 1091579 |
| 76.te00083 | 26 | chr26_26.00536 | 2 | + | 510016  | 510614  | 1091579 |
| 76.te00086 | 26 | chr26_26.00538 | 2 | - | 533205  | 533809  | 1091579 |
| 76.te00087 | 26 | chr26_26.00539 | 2 | + | 542965  | 543551  | 1091579 |
| 76.te00088 | 26 | chr26_26.00540 | 2 | + | 543960  | 544546  | 1091579 |
| 76.te00089 | 26 | chr26_26.00541 | 2 | + | 544955  | 545540  | 1091579 |
| 76.te00091 | 26 | chr26_26.00543 | 2 | + | 575213  | 575723  | 1091579 |
| 76.te00092 | 26 | chr26_26.00544 | 2 | - | 607384  | 607859  | 1091579 |
| 76.te00093 | 26 | chr26_26.00545 | 2 | - | 613267  | 613819  | 1091579 |
| 76.te00094 | 26 | chr26_26.00546 | 2 | - | 615748  | 616300  | 1091579 |
| 76.te00095 | 26 | chr26_26.00547 | 2 | - | 618229  | 618781  | 1091579 |
| 76.te00096 | 26 | chr26_26.00548 | 2 | + | 630950  | 631459  | 1091579 |
| 76.te00097 | 26 | chr26_26.00549 | 2 | + | 689562  | 690024  | 1091579 |
| 76.te00098 | 26 | chr26_26.00550 | 2 | + | 693155  | 693570  | 1091579 |
| 76.te00099 | 26 | chr26_26.00551 | 2 | + | 713813  | 714394  | 1091579 |
| 76.te00100 | 26 | chr26_26.00552 | 2 | + | 719852  | 720426  | 1091579 |
| 76.te00102 | 26 | chr26_26.00554 | 2 | + | 735343  | 735966  | 1091579 |
| 76.te00103 | 26 | chr26_26.00555 | 2 | + | 736028  | 736426  | 1091579 |
| 76.te00104 | 26 | chr26_26.00556 | 2 | + | 736587  | 736985  | 1091579 |
| 76.te00108 | 26 | chr26_26.00560 | 2 | + | 817772  | 818374  | 1091579 |
| 76.te00109 | 26 | chr26_26.00561 | 2 | + | 822213  | 822644  | 1091579 |
| 76.te00110 | 26 | chr26_26.00562 | 2 | + | 824231  | 824503  | 1091579 |
| 76.te00058 | 26 | chr26_26.00564 | 2 | + | 1022469 | 1023061 | 1091579 |



|            |    |                |   |   |         |         |         |
|------------|----|----------------|---|---|---------|---------|---------|
| 76.te00061 | 26 | chr26_26.00567 | 2 | + | 1046028 | 1046589 | 1091579 |
| 76.te00064 | 26 | chr26_26.00569 | 2 | + | 1065157 | 1065669 | 1091579 |
| 77.te00047 | 27 | chr27_27.00499 | 1 | + | 128635  | 128913  | 1127087 |
| 77.te00050 | 27 | chr27_27.00502 | 1 | + | 161319  | 161449  | 1127087 |
| 77.te00051 | 27 | chr27_27.00503 | 1 | + | 161891  | 162620  | 1127087 |
| 77.te00054 | 27 | chr27_27.00505 | 1 | + | 270031  | 270260  | 1127087 |
| 77.te00055 | 27 | chr27_27.00506 | 1 | + | 272029  | 272624  | 1127087 |
| 77.te00057 | 27 | chr27_27.00508 | 1 | + | 288073  | 288240  | 1127087 |
| 77.te00058 | 27 | chr27_27.00509 | 1 | + | 290205  | 290727  | 1127087 |
| 77.te00063 | 27 | chr27_27.00513 | 1 | - | 384129  | 384990  | 1127087 |
| 77.te00067 | 27 | chr27_27.00517 | 1 | - | 408504  | 409366  | 1127087 |
| 77.te00068 | 27 | chr27_27.00518 | 1 | + | 417877  | 418765  | 1127087 |
| 77.te00072 | 27 | chr27_27.00521 | 1 | - | 482166  | 482615  | 1127087 |
| 77.te00074 | 27 | chr27_27.00523 | 1 | - | 498650  | 499211  | 1127087 |
| 77.te00075 | 27 | chr27_27.00524 | 1 | - | 502967  | 503418  | 1127087 |
| 77.te00083 | 27 | chr27_27.00530 | 1 | + | 643720  | 644671  | 1127087 |
| 77.te00084 | 27 | chr27_27.00531 | 1 | + | 665288  | 665623  | 1127087 |
| 77.te00085 | 27 | chr27_27.00532 | 1 | + | 665799  | 666749  | 1127087 |
| 77.te00087 | 27 | chr27_27.00534 | 1 | + | 675763  | 676263  | 1127087 |
| 77.te00088 | 27 | chr27_27.00535 | 1 | - | 686797  | 687308  | 1127087 |
| 77.te00091 | 27 | chr27_27.00537 | 1 | - | 739718  | 740165  | 1127087 |
| 77.te00095 | 27 | chr27_27.00539 | 1 | - | 831826  | 832493  | 1127087 |
| 77.te00096 | 27 | chr27_27.00540 | 1 | - | 860069  | 861001  | 1127087 |
| 77.te00098 | 27 | chr27_27.00542 | 1 | - | 874714  | 875119  | 1127087 |
| 77.te00052 | 27 | chr27_27.00489 | 2 | + | 16948   | 17548   | 1127087 |
| 77.te00059 | 27 | chr27_27.00490 | 2 | - | 29424   | 30003   | 1127087 |
| 77.te00069 | 27 | chr27_27.00491 | 2 | - | 41413   | 41998   | 1127087 |
| 77.te00076 | 27 | chr27_27.00492 | 2 | - | 50871   | 51454   | 1127087 |
| 77.te00079 | 27 | chr27_27.00493 | 2 | - | 55123   | 55692   | 1127087 |
| 77.te00089 | 27 | chr27_27.00494 | 2 | + | 72540   | 73092   | 1127087 |
| 77.te00093 | 27 | chr27_27.00495 | 2 | + | 77552   | 78119   | 1127087 |
| 77.te00094 | 27 | chr27_27.00496 | 2 | + | 82664   | 83249   | 1127087 |
| 77.te00044 | 27 | chr27_27.00497 | 2 | + | 102548  | 103133  | 1127087 |
| 77.te00046 | 27 | chr27_27.00498 | 2 | - | 125368  | 125955  | 1127087 |
| 77.te00048 | 27 | chr27_27.00500 | 2 | + | 132152  | 132745  | 1127087 |
| 77.te00049 | 27 | chr27_27.00501 | 2 | + | 137387  | 137981  | 1127087 |
| 77.te00053 | 27 | chr27_27.00504 | 2 | + | 259943  | 260543  | 1127087 |
| 77.te00056 | 27 | chr27_27.00507 | 2 | + | 287506  | 288063  | 1127087 |
| 77.te00060 | 27 | chr27_27.00510 | 2 | - | 347655  | 348281  | 1127087 |
| 77.te00061 | 27 | chr27_27.00511 | 2 | + | 354161  | 354777  | 1127087 |
| 77.te00062 | 27 | chr27_27.00512 | 2 | - | 368641  | 369263  | 1127087 |
| 77.te00064 | 27 | chr27_27.00514 | 2 | - | 386930  | 387544  | 1127087 |
| 77.te00065 | 27 | chr27_27.00515 | 2 | - | 392691  | 393305  | 1127087 |
| 77.te00066 | 27 | chr27_27.00516 | 2 | - | 403952  | 404532  | 1127087 |
| 77.te00070 | 27 | chr27_27.00519 | 2 | + | 429421  | 430027  | 1127087 |
| 77.te00071 | 27 | chr27_27.00520 | 2 | - | 453657  | 454275  | 1127087 |
| 77.te00073 | 27 | chr27_27.00522 | 2 | - | 495095  | 495734  | 1127087 |
| 77.te00077 | 27 | chr27_27.00525 | 2 | - | 523789  | 524344  | 1127087 |
| 77.te00078 | 27 | chr27_27.00526 | 2 | + | 533057  | 533446  | 1127087 |
| 77.te00080 | 27 | chr27_27.00527 | 2 | + | 592862  | 593504  | 1127087 |
| 77.te00081 | 27 | chr27_27.00528 | 2 | + | 600140  | 600777  | 1127087 |
| 77.te00082 | 27 | chr27_27.00529 | 2 | + | 625513  | 626016  | 1127087 |

|            |    |                |   |   |         |         |         |
|------------|----|----------------|---|---|---------|---------|---------|
| 77.te00086 | 27 | chr27_27.00533 | 2 | + | 667438  | 668030  | 1127087 |
| 77.te00090 | 27 | chr27_27.00536 | 2 | - | 736319  | 736854  | 1127087 |
| 77.te00092 | 27 | chr27_27.00538 | 2 | - | 761526  | 762107  | 1127087 |
| 77.te00097 | 27 | chr27_27.00541 | 2 | - | 869595  | 870037  | 1127087 |
| 77.te00099 | 27 | chr27_27.00543 | 2 | - | 884555  | 885143  | 1127087 |
| 77.te00100 | 27 | chr27_27.00544 | 2 | - | 887429  | 887944  | 1127087 |
| 77.te00101 | 27 | chr27_27.00545 | 2 | - | 898479  | 898861  | 1127087 |
| 77.te00102 | 27 | chr27_27.00546 | 2 | - | 965955  | 966539  | 1127087 |
| 77.te00045 | 27 | chr27_27.00547 | 2 | + | 1118098 | 1118625 | 1127087 |
| 78.te00053 | 28 | chr28_28.00573 | 1 | + | 62691   | 62987   | 1153766 |
| 78.te00059 | 28 | chr28_28.00575 | 1 | + | 80475   | 80726   | 1153766 |
| 78.te00061 | 28 | chr28_28.00576 | 1 | + | 82493   | 82801   | 1153766 |
| 78.te00032 | 28 | chr28_28.00582 | 1 | - | 136104  | 136558  | 1153766 |
| 78.te00034 | 28 | chr28_28.00584 | 1 | - | 202632  | 203299  | 1153766 |
| 78.te00040 | 28 | chr28_28.00589 | 1 | + | 432803  | 433577  | 1153766 |
| 78.te00042 | 28 | chr28_28.00591 | 1 | + | 509249  | 509572  | 1153766 |
| 78.te00043 | 28 | chr28_28.00592 | 1 | + | 515873  | 516184  | 1153766 |
| 78.te00044 | 28 | chr28_28.00593 | 1 | + | 518877  | 519359  | 1153766 |
| 78.te00047 | 28 | chr28_28.00596 | 1 | + | 531946  | 532390  | 1153766 |
| 78.te00048 | 28 | chr28_28.00597 | 1 | + | 537554  | 538198  | 1153766 |
| 78.te00055 | 28 | chr28_28.00603 | 1 | - | 750547  | 750951  | 1153766 |
| 78.te00060 | 28 | chr28_28.00606 | 1 | - | 792725  | 793119  | 1153766 |
| 78.te00065 | 28 | chr28_28.00610 | 1 | + | 835356  | 835745  | 1153766 |
| 78.te00025 | 28 | chr28_28.00618 | 1 | - | 1095506 | 1096356 | 1153766 |
| 78.te00069 | 28 | chr28_28.00614 | 1 | - | 964371  | 964834  | 1153766 |
| 78.te00037 | 28 | chr28_28.00572 | 2 | + | 32007   | 32586   | 1153766 |
| 78.te00057 | 28 | chr28_28.00574 | 2 | + | 79423   | 79998   | 1153766 |
| 78.te00023 | 28 | chr28_28.00577 | 2 | + | 107173  | 107652  | 1153766 |
| 78.te00026 | 28 | chr28_28.00578 | 2 | + | 112409  | 112975  | 1153766 |
| 78.te00029 | 28 | chr28_28.00579 | 2 | - | 116057  | 116711  | 1153766 |
| 78.te00030 | 28 | chr28_28.00580 | 2 | - | 119585  | 120151  | 1153766 |
| 78.te00031 | 28 | chr28_28.00581 | 2 | - | 131204  | 131644  | 1153766 |
| 78.te00033 | 28 | chr28_28.00583 | 2 | - | 170019  | 170664  | 1153766 |
| 78.te00035 | 28 | chr28_28.00585 | 2 | - | 274936  | 275544  | 1153766 |
| 78.te00036 | 28 | chr28_28.00586 | 2 | + | 303850  | 304426  | 1153766 |
| 78.te00038 | 28 | chr28_28.00587 | 2 | - | 409732  | 410335  | 1153766 |
| 78.te00039 | 28 | chr28_28.00588 | 2 | + | 421333  | 421974  | 1153766 |
| 78.te00041 | 28 | chr28_28.00590 | 2 | + | 505079  | 505484  | 1153766 |
| 78.te00045 | 28 | chr28_28.00594 | 2 | + | 519565  | 520160  | 1153766 |
| 78.te00046 | 28 | chr28_28.00595 | 2 | + | 524031  | 524531  | 1153766 |
| 78.te00049 | 28 | chr28_28.00598 | 2 | - | 538203  | 538312  | 1153766 |
| 78.te00050 | 28 | chr28_28.00599 | 2 | + | 579547  | 580128  | 1153766 |
| 78.te00051 | 28 | chr28_28.00600 | 2 | - | 590683  | 591203  | 1153766 |
| 78.te00052 | 28 | chr28_28.00601 | 2 | - | 600188  | 600706  | 1153766 |
| 78.te00054 | 28 | chr28_28.00602 | 2 | - | 650045  | 650752  | 1153766 |
| 78.te00056 | 28 | chr28_28.00604 | 2 | - | 768043  | 768555  | 1153766 |
| 78.te00058 | 28 | chr28_28.00605 | 2 | - | 783292  | 783823  | 1153766 |
| 78.te00062 | 28 | chr28_28.00607 | 2 | - | 816888  | 817270  | 1153766 |
| 78.te00063 | 28 | chr28_28.00608 | 2 | - | 824937  | 825284  | 1153766 |
| 78.te00064 | 28 | chr28_28.00609 | 2 | + | 830514  | 830894  | 1153766 |
| 78.te00066 | 28 | chr28_28.00611 | 2 | - | 835749  | 836167  | 1153766 |
| 78.te00067 | 28 | chr28_28.00612 | 2 | + | 875903  | 876319  | 1153766 |

|            |    |                |   |   |         |         |         |
|------------|----|----------------|---|---|---------|---------|---------|
| 78.te00068 | 28 | chr28_28.00613 | 2 | + | 924141  | 924688  | 1153766 |
| 78.te00070 | 28 | chr28_28.00615 | 2 | + | 968433  | 969056  | 1153766 |
| 78.te00071 | 28 | chr28_28.00616 | 2 | + | 984134  | 984752  | 1153766 |
| 78.te00024 | 28 | chr28_28.00617 | 2 | - | 1074594 | 1075176 | 1153766 |
| 78.te00027 | 28 | chr28_28.00619 | 2 | - | 1112644 | 1113222 | 1153766 |
| 78.te00028 | 28 | chr28_28.00620 | 2 | - | 1135242 | 1135798 | 1153766 |
| 79.te00090 | 29 | chr29_29.00526 | 1 | - | 22735   | 23642   | 1212674 |
| 79.te00085 | 29 | chr29_29.00532 | 1 | - | 146486  | 147656  | 1212674 |
| 79.te00087 | 29 | chr29_29.00534 | 1 | - | 185158  | 185435  | 1212674 |
| 79.te00089 | 29 | chr29_29.00535 | 1 | - | 208571  | 209444  | 1212674 |
| 79.te00093 | 29 | chr29_29.00538 | 1 | - | 317437  | 318635  | 1212674 |
| 79.te00098 | 29 | chr29_29.00543 | 1 | + | 343122  | 344301  | 1212674 |
| 79.te00104 | 29 | chr29_29.00548 | 1 | - | 390655  | 391009  | 1212674 |
| 79.te00106 | 29 | chr29_29.00550 | 1 | + | 463666  | 464010  | 1212674 |
| 79.te00108 | 29 | chr29_29.00552 | 1 | + | 515885  | 516226  | 1212674 |
| 79.te00110 | 29 | chr29_29.00554 | 1 | + | 570315  | 570867  | 1212674 |
| 79.te00111 | 29 | chr29_29.00555 | 1 | + | 570912  | 571832  | 1212674 |
| 79.te00112 | 29 | chr29_29.00556 | 1 | + | 594614  | 595528  | 1212674 |
| 79.te00113 | 29 | chr29_29.00557 | 1 | + | 607812  | 608542  | 1212674 |
| 79.te00114 | 29 | chr29_29.00558 | 1 | + | 638779  | 639654  | 1212674 |
| 79.te00115 | 29 | chr29_29.00559 | 1 | + | 645520  | 645569  | 1212674 |
| 79.te00116 | 29 | chr29_29.00560 | 1 | + | 645888  | 646538  | 1212674 |
| 79.te00117 | 29 | chr29_29.00561 | 1 | - | 652037  | 652400  | 1212674 |
| 79.te00118 | 29 | chr29_29.00562 | 1 | + | 652666  | 652916  | 1212674 |
| 79.te00119 | 29 | chr29_29.00563 | 1 | - | 652860  | 653353  | 1212674 |
| 79.te00120 | 29 | chr29_29.00564 | 1 | - | 656137  | 656432  | 1212674 |
| 79.te00126 | 29 | chr29_29.00570 | 1 | - | 712113  | 712354  | 1212674 |
| 79.te00128 | 29 | chr29_29.00572 | 1 | - | 761735  | 762461  | 1212674 |
| 79.te00129 | 29 | chr29_29.00573 | 1 | - | 767917  | 768372  | 1212674 |
| 79.te00130 | 29 | chr29_29.00574 | 1 | - | 769716  | 769970  | 1212674 |
| 79.te00131 | 29 | chr29_29.00575 | 1 | - | 772905  | 773652  | 1212674 |
| 79.te00133 | 29 | chr29_29.00577 | 1 | - | 827395  | 827560  | 1212674 |
| 79.te00135 | 29 | chr29_29.00579 | 1 | - | 838636  | 839010  | 1212674 |
| 79.te00139 | 29 | chr29_29.00582 | 1 | - | 892802  | 893723  | 1212674 |
| 79.te00142 | 29 | chr29_29.00585 | 1 | - | 931824  | 932265  | 1212674 |
| 79.te00143 | 29 | chr29_29.00586 | 1 | - | 934876  | 935317  | 1212674 |
| 79.te00144 | 29 | chr29_29.00587 | 1 | - | 938903  | 939342  | 1212674 |
| 79.te00152 | 29 | chr29_29.00594 | 1 | - | 991378  | 992439  | 1212674 |
| 79.te00071 | 29 | chr29_29.00603 | 1 | - | 1066763 | 1067487 | 1212674 |
| 79.te00072 | 29 | chr29_29.00604 | 1 | + | 1069555 | 1070615 | 1212674 |
| 79.te00073 | 29 | chr29_29.00605 | 1 | - | 1080048 | 1080277 | 1212674 |
| 79.te00076 | 29 | chr29_29.00608 | 1 | + | 1128955 | 1129235 | 1212674 |
| 79.te00078 | 29 | chr29_29.00610 | 1 | + | 1165407 | 1166098 | 1212674 |
| 79.te00079 | 29 | chr29_29.00611 | 1 | + | 1166252 | 1167103 | 1212674 |
| 79.te00080 | 29 | chr29_29.00612 | 1 | - | 1178109 | 1179014 | 1212674 |
| 79.te00081 | 29 | chr29_29.00613 | 1 | + | 1185799 | 1186478 | 1212674 |
| 79.te00082 | 29 | chr29_29.00614 | 1 | + | 1186632 | 1187485 | 1212674 |
| 79.te00094 | 29 | chr29_29.00539 | 1 | - | 320399  | 321061  | 1212674 |
| 79.te00063 | 29 | chr29_29.00596 | 1 | - | 1011124 | 1011691 | 1212674 |
| 79.te00083 | 29 | chr29_29.00524 | 2 | - | 12312   | 12863   | 1212674 |
| 79.te00088 | 29 | chr29_29.00525 | 2 | - | 17892   | 18440   | 1212674 |
| 79.te00101 | 29 | chr29_29.00527 | 2 | - | 37663   | 38214   | 1212674 |

|            |    |                |   |   |         |         |         |
|------------|----|----------------|---|---|---------|---------|---------|
| 79.te00137 | 29 | chr29_29.00528 | 2 | - | 85762   | 86372   | 1212674 |
| 79.te00146 | 29 | chr29_29.00529 | 2 | - | 95240   | 95834   | 1212674 |
| 79.te00066 | 29 | chr29_29.00530 | 2 | - | 103737  | 104098  | 1212674 |
| 79.te00084 | 29 | chr29_29.00531 | 2 | - | 135233  | 135788  | 1212674 |
| 79.te00086 | 29 | chr29_29.00533 | 2 | - | 156051  | 156387  | 1212674 |
| 79.te00091 | 29 | chr29_29.00536 | 2 | - | 268700  | 269294  | 1212674 |
| 79.te00092 | 29 | chr29_29.00537 | 2 | + | 284421  | 285016  | 1212674 |
| 79.te00095 | 29 | chr29_29.00540 | 2 | - | 327576  | 328145  | 1212674 |
| 79.te00096 | 29 | chr29_29.00541 | 2 | - | 333492  | 334053  | 1212674 |
| 79.te00097 | 29 | chr29_29.00542 | 2 | - | 335234  | 335806  | 1212674 |
| 79.te00099 | 29 | chr29_29.00544 | 2 | + | 344614  | 345185  | 1212674 |
| 79.te00100 | 29 | chr29_29.00545 | 2 | + | 361775  | 362347  | 1212674 |
| 79.te00102 | 29 | chr29_29.00546 | 2 | + | 370619  | 371224  | 1212674 |
| 79.te00103 | 29 | chr29_29.00547 | 2 | + | 382180  | 382751  | 1212674 |
| 79.te00105 | 29 | chr29_29.00549 | 2 | + | 453666  | 454290  | 1212674 |
| 79.te00107 | 29 | chr29_29.00551 | 2 | + | 514601  | 514959  | 1212674 |
| 79.te00109 | 29 | chr29_29.00553 | 2 | + | 532441  | 533049  | 1212674 |
| 79.te00121 | 29 | chr29_29.00565 | 2 | + | 656433  | 657013  | 1212674 |
| 79.te00122 | 29 | chr29_29.00566 | 2 | - | 671715  | 672275  | 1212674 |
| 79.te00123 | 29 | chr29_29.00567 | 2 | - | 678174  | 678747  | 1212674 |
| 79.te00124 | 29 | chr29_29.00568 | 2 | - | 702688  | 703207  | 1212674 |
| 79.te00125 | 29 | chr29_29.00569 | 2 | - | 710059  | 710588  | 1212674 |
| 79.te00127 | 29 | chr29_29.00571 | 2 | - | 756805  | 757396  | 1212674 |
| 79.te00132 | 29 | chr29_29.00576 | 2 | - | 826427  | 827075  | 1212674 |
| 79.te00134 | 29 | chr29_29.00578 | 2 | + | 829316  | 829910  | 1212674 |
| 79.te00136 | 29 | chr29_29.00580 | 2 | - | 849516  | 850071  | 1212674 |
| 79.te00138 | 29 | chr29_29.00581 | 2 | - | 891384  | 892004  | 1212674 |
| 79.te00140 | 29 | chr29_29.00583 | 2 | - | 918251  | 918869  | 1212674 |
| 79.te00141 | 29 | chr29_29.00584 | 2 | - | 923029  | 923642  | 1212674 |
| 79.te00145 | 29 | chr29_29.00588 | 2 | + | 939439  | 940067  | 1212674 |
| 79.te00147 | 29 | chr29_29.00589 | 2 | - | 945756  | 946275  | 1212674 |
| 79.te00148 | 29 | chr29_29.00590 | 2 | + | 963645  | 964204  | 1212674 |
| 79.te00149 | 29 | chr29_29.00591 | 2 | - | 980267  | 980861  | 1212674 |
| 79.te00150 | 29 | chr29_29.00592 | 2 | - | 983797  | 984406  | 1212674 |
| 79.te00151 | 29 | chr29_29.00593 | 2 | - | 987303  | 987884  | 1212674 |
| 79.te00062 | 29 | chr29_29.00595 | 2 | - | 1005370 | 1005955 | 1212674 |
| 79.te00064 | 29 | chr29_29.00597 | 2 | - | 1016929 | 1017515 | 1212674 |
| 79.te00065 | 29 | chr29_29.00598 | 2 | - | 1022377 | 1022965 | 1212674 |
| 79.te00067 | 29 | chr29_29.00599 | 2 | - | 1043476 | 1044054 | 1212674 |
| 79.te00068 | 29 | chr29_29.00600 | 2 | + | 1046352 | 1046813 | 1212674 |
| 79.te00069 | 29 | chr29_29.00601 | 2 | + | 1050298 | 1050899 | 1212674 |
| 79.te00070 | 29 | chr29_29.00602 | 2 | + | 1052900 | 1053496 | 1212674 |
| 79.te00074 | 29 | chr29_29.00606 | 2 | + | 1086672 | 1087252 | 1212674 |
| 79.te00075 | 29 | chr29_29.00607 | 2 | + | 1117523 | 1118100 | 1212674 |
| 79.te00077 | 29 | chr29_29.00609 | 2 | + | 1136121 | 1136707 | 1212674 |
| 80.te00100 | 30 | chr30_30.00560 | 1 | + | 144176  | 144472  | 1403454 |
| 80.te00104 | 30 | chr30_30.00564 | 1 | + | 262069  | 262478  | 1403454 |
| 80.te00107 | 30 | chr30_30.00567 | 1 | + | 288571  | 289449  | 1403454 |
| 80.te00112 | 30 | chr30_30.00572 | 1 | + | 362275  | 362727  | 1403454 |
| 80.te00120 | 30 | chr30_30.00579 | 1 | + | 491942  | 492374  | 1403454 |
| 80.te00121 | 30 | chr30_30.00580 | 1 | + | 494743  | 495603  | 1403454 |
| 80.te00122 | 30 | chr30_30.00581 | 1 | + | 498312  | 498972  | 1403454 |

|            |    |                |   |   |         |         |         |
|------------|----|----------------|---|---|---------|---------|---------|
| 80.te00123 | 30 | chr30_30.00582 | 1 | + | 501112  | 501972  | 1403454 |
| 80.te00124 | 30 | chr30_30.00583 | 1 | + | 504668  | 505192  | 1403454 |
| 80.te00125 | 30 | chr30_30.00584 | 1 | + | 507468  | 508333  | 1403454 |
| 80.te00126 | 30 | chr30_30.00585 | 1 | + | 510902  | 511226  | 1403454 |
| 80.te00142 | 30 | chr30_30.00601 | 1 | + | 769261  | 769454  | 1403454 |
| 80.te00144 | 30 | chr30_30.00603 | 1 | - | 781691  | 782055  | 1403454 |
| 80.te00147 | 30 | chr30_30.00606 | 1 | - | 816678  | 817707  | 1403454 |
| 80.te00150 | 30 | chr30_30.00609 | 1 | - | 853357  | 853780  | 1403454 |
| 80.te00151 | 30 | chr30_30.00610 | 1 | - | 865375  | 865861  | 1403454 |
| 80.te00152 | 30 | chr30_30.00611 | 1 | - | 904417  | 904816  | 1403454 |
| 80.te00155 | 30 | chr30_30.00614 | 1 | - | 994066  | 994287  | 1403454 |
| 80.te00156 | 30 | chr30_30.00615 | 1 | - | 994972  | 995868  | 1403454 |
| 80.te00157 | 30 | chr30_30.00616 | 1 | - | 997075  | 997420  | 1403454 |
| 80.te00067 | 30 | chr30_30.00617 | 1 | - | 1004533 | 1004916 | 1403454 |
| 80.te00069 | 30 | chr30_30.00618 | 1 | + | 1033515 | 1033981 | 1403454 |
| 80.te00076 | 30 | chr30_30.00623 | 1 | + | 1168476 | 1168825 | 1403454 |
| 80.te00077 | 30 | chr30_30.00624 | 1 | + | 1171078 | 1171725 | 1403454 |
| 80.te00081 | 30 | chr30_30.00628 | 1 | - | 1196107 | 1196349 | 1403454 |
| 80.te00082 | 30 | chr30_30.00629 | 1 | - | 1205138 | 1205768 | 1403454 |
| 80.te00086 | 30 | chr30_30.00633 | 1 | + | 1274205 | 1274974 | 1403454 |
| 80.te00088 | 30 | chr30_30.00635 | 1 | + | 1286866 | 1287085 | 1403454 |
| 80.te00090 | 30 | chr30_30.00637 | 1 | + | 1306612 | 1306846 | 1403454 |
| 80.te00091 | 30 | chr30_30.00638 | 1 | + | 1327198 | 1327841 | 1403454 |
| 80.te00092 | 30 | chr30_30.00639 | 1 | + | 1332494 | 1332978 | 1403454 |
| 80.te00093 | 30 | chr30_30.00640 | 1 | + | 1337632 | 1338108 | 1403454 |
| 80.te00094 | 30 | chr30_30.00641 | 1 | - | 1339957 | 1340608 | 1403454 |
| 80.te00095 | 30 | chr30_30.00642 | 1 | + | 1357803 | 1358594 | 1403454 |
| 80.te00097 | 30 | chr30_30.00644 | 1 | + | 1366276 | 1366730 | 1403454 |
| 80.te00098 | 30 | chr30_30.00645 | 1 | + | 1382151 | 1382498 | 1403454 |
| 80.te00099 | 30 | chr30_30.00646 | 1 | + | 1384752 | 1385457 | 1403454 |
| 80.te00136 | 30 | chr30_30.00595 | 1 | + | 611772  | 612262  | 1403454 |
| 80.te00114 | 30 | chr30_30.00556 | 2 | - | 37474   | 38083   | 1403454 |
| 80.te00068 | 30 | chr30_30.00557 | 2 | + | 101877  | 102304  | 1403454 |
| 80.te00071 | 30 | chr30_30.00558 | 2 | - | 105613  | 106191  | 1403454 |
| 80.te00073 | 30 | chr30_30.00559 | 2 | - | 109200  | 109778  | 1403454 |
| 80.te00101 | 30 | chr30_30.00561 | 2 | - | 148660  | 148807  | 1403454 |
| 80.te00102 | 30 | chr30_30.00562 | 2 | + | 194917  | 195520  | 1403454 |
| 80.te00103 | 30 | chr30_30.00563 | 2 | - | 206224  | 206817  | 1403454 |
| 80.te00105 | 30 | chr30_30.00565 | 2 | - | 266439  | 267060  | 1403454 |
| 80.te00106 | 30 | chr30_30.00566 | 2 | - | 284947  | 285568  | 1403454 |
| 80.te00108 | 30 | chr30_30.00568 | 2 | + | 309208  | 309817  | 1403454 |
| 80.te00109 | 30 | chr30_30.00569 | 2 | + | 318694  | 318906  | 1403454 |
| 80.te00110 | 30 | chr30_30.00570 | 2 | + | 337323  | 337963  | 1403454 |
| 80.te00111 | 30 | chr30_30.00571 | 2 | + | 344565  | 345157  | 1403454 |
| 80.te00113 | 30 | chr30_30.00573 | 2 | + | 370953  | 371606  | 1403454 |
| 80.te00115 | 30 | chr30_30.00574 | 2 | + | 387625  | 388268  | 1403454 |
| 80.te00116 | 30 | chr30_30.00575 | 2 | + | 408258  | 408904  | 1403454 |
| 80.te00117 | 30 | chr30_30.00576 | 2 | - | 422220  | 422840  | 1403454 |
| 80.te00118 | 30 | chr30_30.00577 | 2 | + | 447619  | 448212  | 1403454 |
| 80.te00119 | 30 | chr30_30.00578 | 2 | + | 481572  | 482076  | 1403454 |
| 80.te00127 | 30 | chr30_30.00586 | 2 | + | 517070  | 517587  | 1403454 |
| 80.te00128 | 30 | chr30_30.00587 | 2 | + | 525200  | 525759  | 1403454 |

|            |    |                |   |   |         |         |         |
|------------|----|----------------|---|---|---------|---------|---------|
| 80.te00129 | 30 | chr30_30.00588 | 2 | + | 526521  | 527079  | 1403454 |
| 80.te00130 | 30 | chr30_30.00589 | 2 | + | 527841  | 528399  | 1403454 |
| 80.te00131 | 30 | chr30_30.00590 | 2 | + | 529163  | 529721  | 1403454 |
| 80.te00132 | 30 | chr30_30.00591 | 2 | + | 530481  | 531031  | 1403454 |
| 80.te00133 | 30 | chr30_30.00592 | 2 | + | 532968  | 533520  | 1403454 |
| 80.te00134 | 30 | chr30_30.00593 | 2 | + | 535455  | 536013  | 1403454 |
| 80.te00135 | 30 | chr30_30.00594 | 2 | + | 571384  | 571871  | 1403454 |
| 80.te00137 | 30 | chr30_30.00596 | 2 | + | 639477  | 640057  | 1403454 |
| 80.te00138 | 30 | chr30_30.00597 | 2 | + | 659940  | 660496  | 1403454 |
| 80.te00139 | 30 | chr30_30.00598 | 2 | + | 701564  | 702131  | 1403454 |
| 80.te00140 | 30 | chr30_30.00599 | 2 | + | 759914  | 760370  | 1403454 |
| 80.te00141 | 30 | chr30_30.00600 | 2 | + | 768055  | 768487  | 1403454 |
| 80.te00143 | 30 | chr30_30.00602 | 2 | + | 780496  | 780859  | 1403454 |
| 80.te00145 | 30 | chr30_30.00604 | 2 | - | 809796  | 810376  | 1403454 |
| 80.te00146 | 30 | chr30_30.00605 | 2 | - | 815568  | 816140  | 1403454 |
| 80.te00148 | 30 | chr30_30.00607 | 2 | - | 819419  | 819985  | 1403454 |
| 80.te00149 | 30 | chr30_30.00608 | 2 | - | 826863  | 827362  | 1403454 |
| 80.te00153 | 30 | chr30_30.00612 | 2 | - | 905240  | 905605  | 1403454 |
| 80.te00154 | 30 | chr30_30.00613 | 2 | + | 992938  | 993548  | 1403454 |
| 80.te00070 | 30 | chr30_30.00619 | 2 | - | 1049711 | 1050308 | 1403454 |
| 80.te00072 | 30 | chr30_30.00620 | 2 | - | 1067868 | 1068468 | 1403454 |
| 80.te00074 | 30 | chr30_30.00621 | 2 | - | 1111051 | 1111604 | 1403454 |
| 80.te00075 | 30 | chr30_30.00622 | 2 | - | 1159649 | 1160212 | 1403454 |
| 80.te00078 | 30 | chr30_30.00625 | 2 | - | 1172024 | 1172561 | 1403454 |
| 80.te00079 | 30 | chr30_30.00626 | 2 | - | 1178291 | 1178853 | 1403454 |
| 80.te00080 | 30 | chr30_30.00627 | 2 | + | 1192935 | 1193508 | 1403454 |
| 80.te00083 | 30 | chr30_30.00630 | 2 | - | 1208575 | 1209135 | 1403454 |
| 80.te00084 | 30 | chr30_30.00631 | 2 | - | 1212399 | 1212954 | 1403454 |
| 80.te00085 | 30 | chr30_30.00632 | 2 | + | 1246028 | 1246584 | 1403454 |
| 80.te00087 | 30 | chr30_30.00634 | 2 | + | 1280999 | 1281557 | 1403454 |
| 80.te00089 | 30 | chr30_30.00636 | 2 | - | 1287086 | 1287658 | 1403454 |
| 80.te00096 | 30 | chr30_30.00643 | 2 | - | 1365171 | 1365741 | 1403454 |
| 81.te00182 | 31 | chr31_31.00605 | 1 | - | 7164    | 7584    | 1484336 |
| 81.te00202 | 31 | chr31_31.00607 | 1 | - | 98557   | 99051   | 1484336 |
| 81.te00099 | 31 | chr31_31.00608 | 1 | - | 100102  | 100551  | 1484336 |
| 81.te00103 | 31 | chr31_31.00609 | 1 | + | 105469  | 105964  | 1484336 |
| 81.te00135 | 31 | chr31_31.00611 | 1 | - | 139399  | 140322  | 1484336 |
| 81.te00137 | 31 | chr31_31.00612 | 1 | + | 144780  | 145018  | 1484336 |
| 81.te00139 | 31 | chr31_31.00613 | 1 | - | 149981  | 150469  | 1484336 |
| 81.te00141 | 31 | chr31_31.00615 | 1 | - | 170035  | 170847  | 1484336 |
| 81.te00146 | 31 | chr31_31.00619 | 1 | - | 248498  | 249061  | 1484336 |
| 81.te00147 | 31 | chr31_31.00620 | 1 | - | 267612  | 267878  | 1484336 |
| 81.te00151 | 31 | chr31_31.00624 | 1 | + | 313040  | 313897  | 1484336 |
| 81.te00152 | 31 | chr31_31.00625 | 1 | - | 318346  | 318846  | 1484336 |
| 81.te00154 | 31 | chr31_31.00627 | 1 | - | 340017  | 340540  | 1484336 |
| 81.te00155 | 31 | chr31_31.00628 | 1 | - | 347664  | 348209  | 1484336 |
| 81.te00156 | 31 | chr31_31.00629 | 1 | - | 348784  | 349307  | 1484336 |
| 81.te00157 | 31 | chr31_31.00630 | 1 | - | 356444  | 356975  | 1484336 |
| 81.te00158 | 31 | chr31_31.00631 | 1 | - | 364086  | 364631  | 1484336 |
| 81.te00160 | 31 | chr31_31.00633 | 1 | - | 396631  | 397285  | 1484336 |
| 81.te00162 | 31 | chr31_31.00635 | 1 | + | 420660  | 421165  | 1484336 |
| 81.te00163 | 31 | chr31_31.00636 | 1 | - | 428778  | 429260  | 1484336 |

|            |    |                |   |   |         |         |         |
|------------|----|----------------|---|---|---------|---------|---------|
| 81.te00165 | 31 | chr31_31.00638 | 1 | - | 445790  | 446273  | 1484336 |
| 81.te00167 | 31 | chr31_31.00640 | 1 | - | 485437  | 485907  | 1484336 |
| 81.te00171 | 31 | chr31_31.00644 | 1 | - | 570567  | 570841  | 1484336 |
| 81.te00174 | 31 | chr31_31.00647 | 1 | - | 611580  | 611973  | 1484336 |
| 81.te00175 | 31 | chr31_31.00648 | 1 | - | 620158  | 621128  | 1484336 |
| 81.te00176 | 31 | chr31_31.00649 | 1 | - | 622808  | 623604  | 1484336 |
| 81.te00178 | 31 | chr31_31.00651 | 1 | - | 636715  | 637686  | 1484336 |
| 81.te00188 | 31 | chr31_31.00660 | 1 | - | 854311  | 854674  | 1484336 |
| 81.te00191 | 31 | chr31_31.00663 | 1 | - | 874278  | 875192  | 1484336 |
| 81.te00197 | 31 | chr31_31.00669 | 1 | - | 933072  | 933433  | 1484336 |
| 81.te00198 | 31 | chr31_31.00670 | 1 | - | 937977  | 938767  | 1484336 |
| 81.te00200 | 31 | chr31_31.00672 | 1 | - | 950488  | 951274  | 1484336 |
| 81.te00098 | 31 | chr31_31.00676 | 1 | - | 1000283 | 1001164 | 1484336 |
| 81.te00104 | 31 | chr31_31.00680 | 1 | - | 1061525 | 1062003 | 1484336 |
| 81.te00105 | 31 | chr31_31.00681 | 1 | - | 1069536 | 1070207 | 1484336 |
| 81.te00106 | 31 | chr31_31.00682 | 1 | - | 1084681 | 1085026 | 1484336 |
| 81.te00107 | 31 | chr31_31.00683 | 1 | - | 1093785 | 1094440 | 1484336 |
| 81.te00111 | 31 | chr31_31.00686 | 1 | - | 1124991 | 1125902 | 1484336 |
| 81.te00112 | 31 | chr31_31.00687 | 1 | - | 1128194 | 1128949 | 1484336 |
| 81.te00114 | 31 | chr31_31.00689 | 1 | - | 1148348 | 1148996 | 1484336 |
| 81.te00117 | 31 | chr31_31.00692 | 1 | - | 1158333 | 1158595 | 1484336 |
| 81.te00118 | 31 | chr31_31.00693 | 1 | - | 1163239 | 1163491 | 1484336 |
| 81.te00122 | 31 | chr31_31.00697 | 1 | - | 1207823 | 1208464 | 1484336 |
| 81.te00127 | 31 | chr31_31.00702 | 1 | - | 1285808 | 1286514 | 1484336 |
| 81.te00128 | 31 | chr31_31.00703 | 1 | - | 1286627 | 1286997 | 1484336 |
| 81.te00129 | 31 | chr31_31.00704 | 1 | - | 1293003 | 1293395 | 1484336 |
| 81.te00130 | 31 | chr31_31.00705 | 1 | - | 1345848 | 1346498 | 1484336 |
| 81.te00131 | 31 | chr31_31.00706 | 1 | - | 1346495 | 1346724 | 1484336 |
| 81.te00192 | 31 | chr31_31.00664 | 1 | - | 886417  | 886866  | 1484336 |
| 81.te00143 | 31 | chr31_31.00604 | 2 | + | 1900    | 2467    | 1484336 |
| 81.te00136 | 31 | chr31_31.00606 | 2 | - | 13618   | 14201   | 1484336 |
| 81.te00108 | 31 | chr31_31.00610 | 2 | + | 109839  | 110458  | 1484336 |
| 81.te00140 | 31 | chr31_31.00614 | 2 | - | 159518  | 160123  | 1484336 |
| 81.te00142 | 31 | chr31_31.00616 | 2 | + | 181726  | 182345  | 1484336 |
| 81.te00144 | 31 | chr31_31.00617 | 2 | - | 204306  | 204904  | 1484336 |
| 81.te00145 | 31 | chr31_31.00618 | 2 | - | 241840  | 242249  | 1484336 |
| 81.te00148 | 31 | chr31_31.00621 | 2 | - | 278581  | 279144  | 1484336 |
| 81.te00149 | 31 | chr31_31.00622 | 2 | - | 306483  | 307049  | 1484336 |
| 81.te00150 | 31 | chr31_31.00623 | 2 | - | 310545  | 311133  | 1484336 |
| 81.te00153 | 31 | chr31_31.00626 | 2 | + | 334232  | 334822  | 1484336 |
| 81.te00159 | 31 | chr31_31.00632 | 2 | - | 390469  | 391063  | 1484336 |
| 81.te00161 | 31 | chr31_31.00634 | 2 | - | 417644  | 418220  | 1484336 |
| 81.te00164 | 31 | chr31_31.00637 | 2 | - | 436380  | 436976  | 1484336 |
| 81.te00166 | 31 | chr31_31.00639 | 2 | + | 484879  | 485434  | 1484336 |
| 81.te00168 | 31 | chr31_31.00641 | 2 | + | 493915  | 494430  | 1484336 |
| 81.te00169 | 31 | chr31_31.00642 | 2 | - | 495021  | 495611  | 1484336 |
| 81.te00170 | 31 | chr31_31.00643 | 2 | - | 523481  | 524082  | 1484336 |
| 81.te00172 | 31 | chr31_31.00645 | 2 | - | 583047  | 583649  | 1484336 |
| 81.te00173 | 31 | chr31_31.00646 | 2 | - | 589124  | 589726  | 1484336 |
| 81.te00177 | 31 | chr31_31.00650 | 2 | - | 624038  | 624616  | 1484336 |
| 81.te00179 | 31 | chr31_31.00652 | 2 | - | 648495  | 649089  | 1484336 |
| 81.te00180 | 31 | chr31_31.00653 | 2 | - | 715927  | 716523  | 1484336 |

|            |    |                |   |   |         |         |         |
|------------|----|----------------|---|---|---------|---------|---------|
| 81.te00181 | 31 | chr31_31.00654 | 2 | - | 731411  | 732006  | 1484336 |
| 81.te00183 | 31 | chr31_31.00655 | 2 | - | 768411  | 768917  | 1484336 |
| 81.te00184 | 31 | chr31_31.00656 | 2 | - | 780370  | 780849  | 1484336 |
| 81.te00185 | 31 | chr31_31.00657 | 2 | - | 813313  | 813858  | 1484336 |
| 81.te00186 | 31 | chr31_31.00658 | 2 | - | 831990  | 832570  | 1484336 |
| 81.te00187 | 31 | chr31_31.00659 | 2 | - | 848902  | 849456  | 1484336 |
| 81.te00189 | 31 | chr31_31.00661 | 2 | - | 859769  | 860123  | 1484336 |
| 81.te00190 | 31 | chr31_31.00662 | 2 | - | 866416  | 866835  | 1484336 |
| 81.te00193 | 31 | chr31_31.00665 | 2 | + | 917950  | 918543  | 1484336 |
| 81.te00194 | 31 | chr31_31.00666 | 2 | - | 927007  | 927442  | 1484336 |
| 81.te00195 | 31 | chr31_31.00667 | 2 | - | 930114  | 930388  | 1484336 |
| 81.te00196 | 31 | chr31_31.00668 | 2 | - | 932051  | 932605  | 1484336 |
| 81.te00199 | 31 | chr31_31.00671 | 2 | + | 949178  | 949618  | 1484336 |
| 81.te00201 | 31 | chr31_31.00673 | 2 | + | 964549  | 965121  | 1484336 |
| 81.te00203 | 31 | chr31_31.00674 | 2 | - | 990860  | 991176  | 1484336 |
| 81.te00204 | 31 | chr31_31.00675 | 2 | - | 992937  | 993391  | 1484336 |
| 81.te00100 | 31 | chr31_31.00677 | 2 | - | 1016349 | 1016944 | 1484336 |
| 81.te00101 | 31 | chr31_31.00678 | 2 | - | 1033384 | 1033986 | 1484336 |
| 81.te00102 | 31 | chr31_31.00679 | 2 | - | 1042717 | 1043307 | 1484336 |
| 81.te00109 | 31 | chr31_31.00684 | 2 | - | 1101696 | 1102269 | 1484336 |
| 81.te00110 | 31 | chr31_31.00685 | 2 | - | 1117444 | 1118022 | 1484336 |
| 81.te00113 | 31 | chr31_31.00688 | 2 | - | 1137807 | 1138397 | 1484336 |
| 81.te00115 | 31 | chr31_31.00690 | 2 | - | 1150605 | 1151071 | 1484336 |
| 81.te00116 | 31 | chr31_31.00691 | 2 | - | 1155251 | 1155814 | 1484336 |
| 81.te00119 | 31 | chr31_31.00694 | 2 | - | 1175820 | 1176424 | 1484336 |
| 81.te00120 | 31 | chr31_31.00695 | 2 | + | 1188290 | 1188903 | 1484336 |
| 81.te00121 | 31 | chr31_31.00696 | 2 | + | 1206805 | 1207390 | 1484336 |
| 81.te00123 | 31 | chr31_31.00698 | 2 | - | 1231033 | 1231464 | 1484336 |
| 81.te00124 | 31 | chr31_31.00699 | 2 | - | 1242579 | 1242935 | 1484336 |
| 81.te00125 | 31 | chr31_31.00700 | 2 | - | 1251533 | 1251892 | 1484336 |
| 81.te00126 | 31 | chr31_31.00701 | 2 | - | 1279703 | 1280267 | 1484336 |
| 81.te00132 | 31 | chr31_31.00707 | 2 | - | 1350330 | 1350875 | 1484336 |
| 81.te00133 | 31 | chr31_31.00708 | 2 | + | 1374149 | 1374882 | 1484336 |
| 81.te00134 | 31 | chr31_31.00709 | 2 | - | 1382534 | 1383132 | 1484336 |
| 81.te00138 | 31 | chr31_31.00710 | 2 | + | 1450368 | 1450966 | 1484336 |
| 82.te00087 | 32 | chr32_32.00733 | 1 | - | 172653  | 173110  | 1565925 |
| 82.te00088 | 32 | chr32_32.00734 | 1 | - | 179507  | 180309  | 1565925 |
| 82.te00090 | 32 | chr32_32.00736 | 1 | + | 198285  | 198790  | 1565925 |
| 82.te00093 | 32 | chr32_32.00739 | 1 | + | 246630  | 246984  | 1565925 |
| 82.te00094 | 32 | chr32_32.00740 | 1 | + | 247074  | 247811  | 1565925 |
| 82.te00096 | 32 | chr32_32.00742 | 1 | + | 272035  | 272436  | 1565925 |
| 82.te00099 | 32 | chr32_32.00744 | 1 | + | 347962  | 348764  | 1565925 |
| 82.te00103 | 32 | chr32_32.00747 | 1 | + | 381631  | 382496  | 1565925 |
| 82.te00104 | 32 | chr32_32.00748 | 1 | + | 391036  | 391641  | 1565925 |
| 82.te00108 | 32 | chr32_32.00751 | 1 | + | 451771  | 452773  | 1565925 |
| 82.te00110 | 32 | chr32_32.00753 | 1 | + | 487217  | 487673  | 1565925 |
| 82.te00119 | 32 | chr32_32.00762 | 1 | - | 698193  | 698999  | 1565925 |
| 82.te00128 | 32 | chr32_32.00770 | 1 | - | 773158  | 774187  | 1565925 |
| 82.te00132 | 32 | chr32_32.00774 | 1 | - | 817931  | 818960  | 1565925 |
| 82.te00140 | 32 | chr32_32.00781 | 1 | - | 967258  | 968289  | 1565925 |
| 82.te00063 | 32 | chr32_32.00784 | 1 | - | 1029132 | 1030169 | 1565925 |
| 82.te00064 | 32 | chr32_32.00785 | 1 | - | 1030490 | 1030966 | 1565925 |



|            |    |                |   |   |         |         |         |
|------------|----|----------------|---|---|---------|---------|---------|
| 82.te00065 | 32 | chr32_32.00786 | 1 | - | 1057200 | 1057668 | 1565925 |
| 82.te00072 | 32 | chr32_32.00792 | 1 | - | 1232409 | 1232951 | 1565925 |
| 82.te00073 | 32 | chr32_32.00793 | 1 | - | 1257930 | 1258504 | 1565925 |
| 82.te00076 | 32 | chr32_32.00795 | 1 | + | 1317330 | 1317560 | 1565925 |
| 82.te00077 | 32 | chr32_32.00796 | 1 | - | 1348658 | 1348979 | 1565925 |
| 82.te00079 | 32 | chr32_32.00798 | 1 | + | 1426155 | 1426341 | 1565925 |
| 82.te00080 | 32 | chr32_32.00799 | 1 | + | 1456576 | 1457297 | 1565925 |
| 82.te00083 | 32 | chr32_32.00802 | 1 | - | 1554744 | 1555215 | 1565925 |
| 82.te00085 | 32 | chr32_32.00724 | 2 | - | 16065   | 16633   | 1565925 |
| 82.te00097 | 32 | chr32_32.00725 | 2 | - | 28339   | 28924   | 1565925 |
| 82.te00102 | 32 | chr32_32.00726 | 2 | + | 37448   | 37924   | 1565925 |
| 82.te00106 | 32 | chr32_32.00727 | 2 | - | 44067   | 44636   | 1565925 |
| 82.te00120 | 32 | chr32_32.00728 | 2 | + | 70076   | 70677   | 1565925 |
| 82.te00134 | 32 | chr32_32.00729 | 2 | - | 82354   | 82943   | 1565925 |
| 82.te00070 | 32 | chr32_32.00730 | 2 | - | 119109  | 119634  | 1565925 |
| 82.te00074 | 32 | chr32_32.00731 | 2 | - | 125627  | 126166  | 1565925 |
| 82.te00086 | 32 | chr32_32.00732 | 2 | - | 168064  | 168640  | 1565925 |
| 82.te00089 | 32 | chr32_32.00735 | 2 | - | 184585  | 185157  | 1565925 |
| 82.te00091 | 32 | chr32_32.00737 | 2 | + | 221304  | 221929  | 1565925 |
| 82.te00092 | 32 | chr32_32.00738 | 2 | + | 231499  | 232091  | 1565925 |
| 82.te00095 | 32 | chr32_32.00741 | 2 | + | 252120  | 252712  | 1565925 |
| 82.te00098 | 32 | chr32_32.00743 | 2 | - | 308213  | 308799  | 1565925 |
| 82.te00100 | 32 | chr32_32.00745 | 2 | + | 351853  | 352487  | 1565925 |
| 82.te00101 | 32 | chr32_32.00746 | 2 | + | 364734  | 365319  | 1565925 |
| 82.te00105 | 32 | chr32_32.00749 | 2 | + | 413608  | 414197  | 1565925 |
| 82.te00107 | 32 | chr32_32.00750 | 2 | + | 448878  | 449449  | 1565925 |
| 82.te00109 | 32 | chr32_32.00752 | 2 | - | 452977  | 453549  | 1565925 |
| 82.te00111 | 32 | chr32_32.00754 | 2 | + | 515289  | 515964  | 1565925 |
| 82.te00112 | 32 | chr32_32.00755 | 2 | + | 537674  | 538252  | 1565925 |
| 82.te00113 | 32 | chr32_32.00756 | 2 | - | 541600  | 542251  | 1565925 |
| 82.te00114 | 32 | chr32_32.00757 | 2 | - | 584082  | 584684  | 1565925 |
| 82.te00115 | 32 | chr32_32.00758 | 2 | - | 593540  | 594238  | 1565925 |
| 82.te00116 | 32 | chr32_32.00759 | 2 | - | 626445  | 626779  | 1565925 |
| 82.te00117 | 32 | chr32_32.00760 | 2 | + | 638411  | 639049  | 1565925 |
| 82.te00118 | 32 | chr32_32.00761 | 2 | - | 657323  | 657863  | 1565925 |
| 82.te00121 | 32 | chr32_32.00763 | 2 | - | 722771  | 723361  | 1565925 |
| 82.te00122 | 32 | chr32_32.00764 | 2 | - | 731135  | 731747  | 1565925 |
| 82.te00123 | 32 | chr32_32.00765 | 2 | - | 749208  | 749805  | 1565925 |
| 82.te00124 | 32 | chr32_32.00766 | 2 | - | 752382  | 752993  | 1565925 |
| 82.te00125 | 32 | chr32_32.00767 | 2 | - | 766173  | 766733  | 1565925 |
| 82.te00126 | 32 | chr32_32.00768 | 2 | - | 769506  | 769944  | 1565925 |
| 82.te00127 | 32 | chr32_32.00769 | 2 | - | 772537  | 773135  | 1565925 |
| 82.te00129 | 32 | chr32_32.00771 | 2 | - | 790521  | 791119  | 1565925 |
| 82.te00130 | 32 | chr32_32.00772 | 2 | - | 798600  | 799175  | 1565925 |
| 82.te00131 | 32 | chr32_32.00773 | 2 | - | 804920  | 805495  | 1565925 |
| 82.te00133 | 32 | chr32_32.00775 | 2 | + | 824130  | 824733  | 1565925 |
| 82.te00135 | 32 | chr32_32.00776 | 2 | - | 877869  | 878464  | 1565925 |
| 82.te00136 | 32 | chr32_32.00777 | 2 | - | 886955  | 887551  | 1565925 |
| 82.te00137 | 32 | chr32_32.00778 | 2 | - | 916223  | 916817  | 1565925 |
| 82.te00138 | 32 | chr32_32.00779 | 2 | + | 934316  | 934967  | 1565925 |
| 82.te00139 | 32 | chr32_32.00780 | 2 | - | 949020  | 949675  | 1565925 |
| 82.te00141 | 32 | chr32_32.00782 | 2 | - | 988455  | 989068  | 1565925 |

|            |    |                |   |   |         |         |         |
|------------|----|----------------|---|---|---------|---------|---------|
| 82.te00062 | 32 | chr32_32.00783 | 2 | - | 1014700 | 1015339 | 1565925 |
| 82.te00066 | 32 | chr32_32.00787 | 2 | - | 1125921 | 1126488 | 1565925 |
| 82.te00067 | 32 | chr32_32.00788 | 2 | + | 1167650 | 1168106 | 1565925 |
| 82.te00068 | 32 | chr32_32.00789 | 2 | + | 1169021 | 1169463 | 1565925 |
| 82.te00069 | 32 | chr32_32.00790 | 2 | + | 1191706 | 1192265 | 1565925 |
| 82.te00071 | 32 | chr32_32.00791 | 2 | - | 1215593 | 1216214 | 1565925 |
| 82.te00075 | 32 | chr32_32.00794 | 2 | + | 1278798 | 1279379 | 1565925 |
| 82.te00078 | 32 | chr32_32.00797 | 2 | + | 1399674 | 1400241 | 1565925 |
| 82.te00081 | 32 | chr32_32.00800 | 2 | + | 1509736 | 1510260 | 1565925 |
| 82.te00082 | 32 | chr32_32.00801 | 2 | + | 1546420 | 1546813 | 1565925 |
| 82.te00084 | 32 | chr32_32.00803 | 2 | + | 1558854 | 1559396 | 1565925 |
| 83.te00113 | 33 | chr33_33.00715 | 1 | - | 23667   | 24574   | 1583673 |
| 83.te00136 | 33 | chr33_33.00719 | 1 | - | 57677   | 58588   | 1583673 |
| 83.te00147 | 33 | chr33_33.00720 | 1 | - | 69997   | 70690   | 1583673 |
| 83.te00106 | 33 | chr33_33.00724 | 1 | + | 186049  | 186322  | 1583673 |
| 83.te00107 | 33 | chr33_33.00725 | 1 | - | 190340  | 191566  | 1583673 |
| 83.te00109 | 33 | chr33_33.00727 | 1 | - | 194588  | 195588  | 1583673 |
| 83.te00115 | 33 | chr33_33.00732 | 1 | - | 250184  | 250809  | 1583673 |
| 83.te00122 | 33 | chr33_33.00738 | 1 | - | 422146  | 422630  | 1583673 |
| 83.te00128 | 33 | chr33_33.00743 | 1 | + | 483000  | 483335  | 1583673 |
| 83.te00134 | 33 | chr33_33.00748 | 1 | + | 544297  | 545132  | 1583673 |
| 83.te00137 | 33 | chr33_33.00750 | 1 | - | 586247  | 586895  | 1583673 |
| 83.te00138 | 33 | chr33_33.00751 | 1 | + | 589716  | 589927  | 1583673 |
| 83.te00139 | 33 | chr33_33.00752 | 1 | + | 592594  | 593436  | 1583673 |
| 83.te00140 | 33 | chr33_33.00753 | 1 | + | 595396  | 596062  | 1583673 |
| 83.te00141 | 33 | chr33_33.00754 | 1 | + | 601015  | 601970  | 1583673 |
| 83.te00142 | 33 | chr33_33.00755 | 1 | - | 619531  | 619854  | 1583673 |
| 83.te00144 | 33 | chr33_33.00757 | 1 | + | 645503  | 646481  | 1583673 |
| 83.te00145 | 33 | chr33_33.00758 | 1 | - | 654479  | 654698  | 1583673 |
| 83.te00151 | 33 | chr33_33.00763 | 1 | + | 780425  | 781323  | 1583673 |
| 83.te00162 | 33 | chr33_33.00772 | 1 | - | 892703  | 893265  | 1583673 |
| 83.te00163 | 33 | chr33_33.00773 | 1 | + | 909100  | 909834  | 1583673 |
| 83.te00165 | 33 | chr33_33.00775 | 1 | + | 950152  | 950427  | 1583673 |
| 83.te00166 | 33 | chr33_33.00776 | 1 | + | 981680  | 982133  | 1583673 |
| 83.te00167 | 33 | chr33_33.00777 | 1 | + | 991961  | 992460  | 1583673 |
| 83.te00063 | 33 | chr33_33.00778 | 1 | + | 1000543 | 1000632 | 1583673 |
| 83.te00064 | 33 | chr33_33.00779 | 1 | + | 1001016 | 1001931 | 1583673 |
| 83.te00065 | 33 | chr33_33.00780 | 1 | + | 1039963 | 1040856 | 1583673 |
| 83.te00070 | 33 | chr33_33.00784 | 1 | + | 1081139 | 1081536 | 1583673 |
| 83.te00072 | 33 | chr33_33.00786 | 1 | + | 1132199 | 1133118 | 1583673 |
| 83.te00075 | 33 | chr33_33.00789 | 1 | - | 1156088 | 1156420 | 1583673 |
| 83.te00076 | 33 | chr33_33.00790 | 1 | + | 1167044 | 1167516 | 1583673 |
| 83.te00078 | 33 | chr33_33.00792 | 1 | + | 1211483 | 1212116 | 1583673 |
| 83.te00079 | 33 | chr33_33.00793 | 1 | + | 1226515 | 1227296 | 1583673 |
| 83.te00080 | 33 | chr33_33.00794 | 1 | + | 1271600 | 1272442 | 1583673 |
| 83.te00082 | 33 | chr33_33.00796 | 1 | + | 1288045 | 1288456 | 1583673 |
| 83.te00083 | 33 | chr33_33.00797 | 1 | + | 1288629 | 1289451 | 1583673 |
| 83.te00086 | 33 | chr33_33.00800 | 1 | + | 1316864 | 1317777 | 1583673 |
| 83.te00089 | 33 | chr33_33.00803 | 1 | + | 1335012 | 1335913 | 1583673 |
| 83.te00093 | 33 | chr33_33.00807 | 1 | + | 1393184 | 1393404 | 1583673 |
| 83.te00094 | 33 | chr33_33.00808 | 1 | + | 1410447 | 1411415 | 1583673 |
| 83.te00096 | 33 | chr33_33.00810 | 1 | + | 1442545 | 1443401 | 1583673 |

|            |    |                |   |   |         |         |         |
|------------|----|----------------|---|---|---------|---------|---------|
| 83.te00097 | 33 | chr33_33.00811 | 1 | + | 1451823 | 1452664 | 1583673 |
| 83.te00100 | 33 | chr33_33.00814 | 1 | + | 1469602 | 1470024 | 1583673 |
| 83.te00101 | 33 | chr33_33.00815 | 1 | + | 1470126 | 1470536 | 1583673 |
| 83.te00104 | 33 | chr33_33.00818 | 1 | + | 1576159 | 1576559 | 1583673 |
| 83.te00117 | 33 | chr33_33.00734 | 1 | + | 313327  | 313952  | 1583673 |
| 83.te00118 | 33 | chr33_33.00735 | 1 | + | 332004  | 332660  | 1583673 |
| 83.te00123 | 33 | chr33_33.00739 | 1 | + | 426046  | 426686  | 1583673 |
| 83.te00153 | 33 | chr33_33.00765 | 1 | + | 786288  | 786797  | 1583673 |
| 83.te00154 | 33 | chr33_33.00766 | 1 | + | 796833  | 797449  | 1583673 |
| 83.te00156 | 33 | chr33_33.00767 | 1 | - | 827055  | 827618  | 1583673 |
| 83.te00081 | 33 | chr33_33.00795 | 1 | + | 1283256 | 1283650 | 1583673 |
| 83.te00085 | 33 | chr33_33.00799 | 1 | + | 1316072 | 1316469 | 1583673 |
| 83.te00087 | 33 | chr33_33.00801 | 1 | - | 1317950 | 1318368 | 1583673 |
| 83.te00088 | 33 | chr33_33.00802 | 1 | + | 1334220 | 1334617 | 1583673 |
| 83.te00090 | 33 | chr33_33.00804 | 1 | - | 1336086 | 1336485 | 1583673 |
| 83.te00155 | 33 | chr33_33.00714 | 2 | + | 8050    | 8655    | 1583673 |
| 83.te00119 | 33 | chr33_33.00716 | 2 | - | 35816   | 36437   | 1583673 |
| 83.te00126 | 33 | chr33_33.00717 | 2 | - | 45258   | 45871   | 1583673 |
| 83.te00129 | 33 | chr33_33.00718 | 2 | - | 47785   | 48421   | 1583673 |
| 83.te00157 | 33 | chr33_33.00721 | 2 | + | 82772   | 83397   | 1583673 |
| 83.te00069 | 33 | chr33_33.00722 | 2 | + | 106017  | 106640  | 1583673 |
| 83.te00105 | 33 | chr33_33.00723 | 2 | - | 181185  | 181818  | 1583673 |
| 83.te00108 | 33 | chr33_33.00726 | 2 | - | 193274  | 193894  | 1583673 |
| 83.te00110 | 33 | chr33_33.00728 | 2 | - | 206202  | 206828  | 1583673 |
| 83.te00111 | 33 | chr33_33.00729 | 2 | - | 233547  | 234189  | 1583673 |
| 83.te00112 | 33 | chr33_33.00730 | 2 | - | 244391  | 245040  | 1583673 |
| 83.te00114 | 33 | chr33_33.00731 | 2 | - | 247358  | 247991  | 1583673 |
| 83.te00116 | 33 | chr33_33.00733 | 2 | - | 263638  | 264259  | 1583673 |
| 83.te00120 | 33 | chr33_33.00736 | 2 | + | 399836  | 400477  | 1583673 |
| 83.te00121 | 33 | chr33_33.00737 | 2 | + | 419515  | 420062  | 1583673 |
| 83.te00124 | 33 | chr33_33.00740 | 2 | + | 428717  | 429351  | 1583673 |
| 83.te00125 | 33 | chr33_33.00741 | 2 | + | 440941  | 441548  | 1583673 |
| 83.te00127 | 33 | chr33_33.00742 | 2 | + | 463763  | 464399  | 1583673 |
| 83.te00130 | 33 | chr33_33.00744 | 2 | + | 493769  | 494366  | 1583673 |
| 83.te00131 | 33 | chr33_33.00745 | 2 | + | 500935  | 501573  | 1583673 |
| 83.te00132 | 33 | chr33_33.00746 | 2 | + | 519357  | 519958  | 1583673 |
| 83.te00133 | 33 | chr33_33.00747 | 2 | - | 540511  | 541106  | 1583673 |
| 83.te00135 | 33 | chr33_33.00749 | 2 | + | 583232  | 583689  | 1583673 |
| 83.te00143 | 33 | chr33_33.00756 | 2 | + | 624159  | 624718  | 1583673 |
| 83.te00146 | 33 | chr33_33.00759 | 2 | + | 658200  | 658752  | 1583673 |
| 83.te00148 | 33 | chr33_33.00760 | 2 | + | 734567  | 735151  | 1583673 |
| 83.te00149 | 33 | chr33_33.00761 | 2 | + | 764827  | 765405  | 1583673 |
| 83.te00150 | 33 | chr33_33.00762 | 2 | + | 770729  | 771294  | 1583673 |
| 83.te00152 | 33 | chr33_33.00764 | 2 | + | 781337  | 781902  | 1583673 |
| 83.te00158 | 33 | chr33_33.00768 | 2 | + | 830010  | 830578  | 1583673 |
| 83.te00159 | 33 | chr33_33.00769 | 2 | + | 836992  | 837566  | 1583673 |
| 83.te00160 | 33 | chr33_33.00770 | 2 | - | 882956  | 883530  | 1583673 |
| 83.te00161 | 33 | chr33_33.00771 | 2 | + | 885679  | 886268  | 1583673 |
| 83.te00164 | 33 | chr33_33.00774 | 2 | + | 909848  | 910425  | 1583673 |
| 83.te00066 | 33 | chr33_33.00781 | 2 | + | 1040894 | 1041510 | 1583673 |
| 83.te00067 | 33 | chr33_33.00782 | 2 | - | 1043384 | 1043993 | 1583673 |
| 83.te00068 | 33 | chr33_33.00783 | 2 | + | 1059729 | 1060338 | 1583673 |

|            |    |                |   |   |         |         |         |
|------------|----|----------------|---|---|---------|---------|---------|
| 83.te00071 | 33 | chr33_33.00785 | 2 | - | 1121607 | 1122196 | 1583673 |
| 83.te00073 | 33 | chr33_33.00787 | 2 | + | 1140982 | 1141591 | 1583673 |
| 83.te00074 | 33 | chr33_33.00788 | 2 | + | 1144059 | 1144709 | 1583673 |
| 83.te00077 | 33 | chr33_33.00791 | 2 | + | 1197051 | 1197666 | 1583673 |
| 83.te00084 | 33 | chr33_33.00798 | 2 | + | 1301276 | 1301803 | 1583673 |
| 83.te00091 | 33 | chr33_33.00805 | 2 | + | 1339431 | 1339964 | 1583673 |
| 83.te00092 | 33 | chr33_33.00806 | 2 | + | 1376336 | 1376904 | 1583673 |
| 83.te00095 | 33 | chr33_33.00809 | 2 | + | 1441896 | 1442442 | 1583673 |
| 83.te00098 | 33 | chr33_33.00812 | 2 | - | 1460883 | 1461466 | 1583673 |
| 83.te00099 | 33 | chr33_33.00813 | 2 | + | 1469018 | 1469588 | 1583673 |
| 83.te00102 | 33 | chr33_33.00816 | 2 | + | 1487913 | 1488500 | 1583673 |
| 83.te00103 | 33 | chr33_33.00817 | 2 | + | 1561692 | 1562298 | 1583673 |
| 84.te00104 | 34 | chr34_34.00758 | 1 | + | 55971   | 56279   | 1866754 |
| 84.te00155 | 34 | chr34_34.00759 | 1 | + | 90809   | 91046   | 1866754 |
| 84.te00003 | 34 | chr34_34.00760 | 1 | + | 104178  | 104618  | 1866754 |
| 84.te00030 | 34 | chr34_34.00763 | 1 | + | 133400  | 133855  | 1866754 |
| 84.te00043 | 34 | chr34_34.00764 | 1 | + | 144030  | 144227  | 1866754 |
| 84.te00068 | 34 | chr34_34.00766 | 1 | + | 192894  | 193093  | 1866754 |
| 84.te00069 | 34 | chr34_34.00767 | 1 | + | 201816  | 202394  | 1866754 |
| 84.te00070 | 34 | chr34_34.00768 | 1 | + | 202464  | 202939  | 1866754 |
| 84.te00071 | 34 | chr34_34.00769 | 1 | + | 220272  | 221220  | 1866754 |
| 84.te00076 | 34 | chr34_34.00772 | 1 | + | 282076  | 282451  | 1866754 |
| 84.te00079 | 34 | chr34_34.00774 | 1 | + | 321626  | 321945  | 1866754 |
| 84.te00080 | 34 | chr34_34.00775 | 1 | - | 321853  | 322425  | 1866754 |
| 84.te00085 | 34 | chr34_34.00780 | 1 | + | 372116  | 373114  | 1866754 |
| 84.te00090 | 34 | chr34_34.00784 | 1 | + | 416853  | 417441  | 1866754 |
| 84.te00091 | 34 | chr34_34.00785 | 1 | + | 417442  | 417951  | 1866754 |
| 84.te00093 | 34 | chr34_34.00787 | 1 | + | 430948  | 431668  | 1866754 |
| 84.te00096 | 34 | chr34_34.00790 | 1 | + | 470958  | 471526  | 1866754 |
| 84.te00099 | 34 | chr34_34.00792 | 1 | - | 481535  | 482313  | 1866754 |
| 84.te00100 | 34 | chr34_34.00793 | 1 | - | 482324  | 482680  | 1866754 |
| 84.te00101 | 34 | chr34_34.00794 | 1 | - | 522357  | 522723  | 1866754 |
| 84.te00107 | 34 | chr34_34.00799 | 1 | - | 653290  | 653951  | 1866754 |
| 84.te00110 | 34 | chr34_34.00801 | 1 | - | 707210  | 707627  | 1866754 |
| 84.te00111 | 34 | chr34_34.00802 | 1 | + | 710541  | 711084  | 1866754 |
| 84.te00112 | 34 | chr34_34.00803 | 1 | - | 714783  | 715177  | 1866754 |
| 84.te00113 | 34 | chr34_34.00804 | 1 | + | 718095  | 718638  | 1866754 |
| 84.te00114 | 34 | chr34_34.00805 | 1 | - | 722325  | 722719  | 1866754 |
| 84.te00115 | 34 | chr34_34.00806 | 1 | + | 725631  | 726174  | 1866754 |
| 84.te00116 | 34 | chr34_34.00807 | 1 | - | 729602  | 729996  | 1866754 |
| 84.te00117 | 34 | chr34_34.00808 | 1 | + | 732901  | 733444  | 1866754 |
| 84.te00118 | 34 | chr34_34.00809 | 1 | - | 737133  | 737527  | 1866754 |
| 84.te00119 | 34 | chr34_34.00810 | 1 | + | 740501  | 741044  | 1866754 |
| 84.te00120 | 34 | chr34_34.00811 | 1 | - | 744731  | 745125  | 1866754 |
| 84.te00121 | 34 | chr34_34.00812 | 1 | + | 748030  | 748573  | 1866754 |
| 84.te00122 | 34 | chr34_34.00813 | 1 | - | 752270  | 752664  | 1866754 |
| 84.te00123 | 34 | chr34_34.00814 | 1 | + | 755569  | 756112  | 1866754 |
| 84.te00124 | 34 | chr34_34.00815 | 1 | - | 759797  | 760191  | 1866754 |
| 84.te00125 | 34 | chr34_34.00816 | 1 | + | 763108  | 763651  | 1866754 |
| 84.te00126 | 34 | chr34_34.00817 | 1 | - | 767340  | 767734  | 1866754 |
| 84.te00127 | 34 | chr34_34.00818 | 1 | + | 770650  | 771193  | 1866754 |
| 84.te00128 | 34 | chr34_34.00819 | 1 | - | 774888  | 775282  | 1866754 |

|            |    |                |   |   |         |         |         |
|------------|----|----------------|---|---|---------|---------|---------|
| 84.te00129 | 34 | chr34_34.00820 | 1 | + | 778184  | 778727  | 1866754 |
| 84.te00130 | 34 | chr34_34.00821 | 1 | - | 782411  | 782805  | 1866754 |
| 84.te00131 | 34 | chr34_34.00822 | 1 | + | 785722  | 786265  | 1866754 |
| 84.te00132 | 34 | chr34_34.00823 | 1 | - | 789964  | 790358  | 1866754 |
| 84.te00133 | 34 | chr34_34.00824 | 1 | + | 793275  | 793818  | 1866754 |
| 84.te00134 | 34 | chr34_34.00825 | 1 | - | 797517  | 797911  | 1866754 |
| 84.te00135 | 34 | chr34_34.00826 | 1 | + | 800817  | 801360  | 1866754 |
| 84.te00136 | 34 | chr34_34.00827 | 1 | - | 805047  | 805441  | 1866754 |
| 84.te00137 | 34 | chr34_34.00828 | 1 | + | 808356  | 808899  | 1866754 |
| 84.te00138 | 34 | chr34_34.00829 | 1 | - | 812594  | 812988  | 1866754 |
| 84.te00139 | 34 | chr34_34.00830 | 1 | + | 815910  | 816453  | 1866754 |
| 84.te00140 | 34 | chr34_34.00831 | 1 | - | 819881  | 820275  | 1866754 |
| 84.te00141 | 34 | chr34_34.00832 | 1 | + | 823179  | 823722  | 1866754 |
| 84.te00142 | 34 | chr34_34.00833 | 1 | - | 827419  | 827813  | 1866754 |
| 84.te00143 | 34 | chr34_34.00834 | 1 | + | 830731  | 831274  | 1866754 |
| 84.te00144 | 34 | chr34_34.00835 | 1 | - | 834957  | 835351  | 1866754 |
| 84.te00145 | 34 | chr34_34.00836 | 1 | + | 838265  | 838808  | 1866754 |
| 84.te00146 | 34 | chr34_34.00837 | 1 | - | 842504  | 842898  | 1866754 |
| 84.te00147 | 34 | chr34_34.00838 | 1 | + | 845811  | 846354  | 1866754 |
| 84.te00148 | 34 | chr34_34.00839 | 1 | - | 850049  | 850443  | 1866754 |
| 84.te00149 | 34 | chr34_34.00840 | 1 | + | 853349  | 853892  | 1866754 |
| 84.te00150 | 34 | chr34_34.00841 | 1 | - | 857581  | 857975  | 1866754 |
| 84.te00151 | 34 | chr34_34.00842 | 1 | + | 860880  | 861423  | 1866754 |
| 84.te00152 | 34 | chr34_34.00843 | 1 | - | 865123  | 865517  | 1866754 |
| 84.te00153 | 34 | chr34_34.00844 | 1 | + | 868421  | 868964  | 1866754 |
| 84.te00156 | 34 | chr34_34.00846 | 1 | - | 913162  | 913424  | 1866754 |
| 84.te00157 | 34 | chr34_34.00847 | 1 | - | 915551  | 915879  | 1866754 |
| 84.te00158 | 34 | chr34_34.00848 | 1 | - | 933680  | 934762  | 1866754 |
| 84.te00159 | 34 | chr34_34.00849 | 1 | - | 935344  | 935645  | 1866754 |
| 84.te00160 | 34 | chr34_34.00850 | 1 | - | 947466  | 948552  | 1866754 |
| 84.te00162 | 34 | chr34_34.00852 | 1 | - | 971630  | 972700  | 1866754 |
| 84.te00163 | 34 | chr34_34.00853 | 1 | - | 973282  | 973582  | 1866754 |
| 84.te00004 | 34 | chr34_34.00857 | 1 | - | 1049869 | 1050884 | 1866754 |
| 84.te00005 | 34 | chr34_34.00858 | 1 | - | 1057122 | 1058133 | 1866754 |
| 84.te00009 | 34 | chr34_34.00861 | 1 | - | 1085732 | 1086735 | 1866754 |
| 84.te00010 | 34 | chr34_34.00862 | 1 | - | 1086861 | 1087034 | 1866754 |
| 84.te00016 | 34 | chr34_34.00866 | 1 | + | 1197887 | 1198857 | 1866754 |
| 84.te00018 | 34 | chr34_34.00868 | 1 | + | 1223511 | 1223963 | 1866754 |
| 84.te00021 | 34 | chr34_34.00871 | 1 | + | 1267819 | 1268773 | 1866754 |
| 84.te00022 | 34 | chr34_34.00872 | 1 | - | 1268425 | 1268674 | 1866754 |
| 84.te00024 | 34 | chr34_34.00874 | 1 | + | 1285931 | 1286448 | 1866754 |
| 84.te00025 | 34 | chr34_34.00875 | 1 | + | 1287002 | 1287823 | 1866754 |
| 84.te00032 | 34 | chr34_34.00881 | 1 | + | 1373904 | 1374247 | 1866754 |
| 84.te00033 | 34 | chr34_34.00882 | 1 | + | 1374657 | 1374961 | 1866754 |
| 84.te00035 | 34 | chr34_34.00884 | 1 | + | 1393774 | 1394142 | 1866754 |
| 84.te00036 | 34 | chr34_34.00885 | 1 | + | 1394529 | 1394880 | 1866754 |
| 84.te00040 | 34 | chr34_34.00889 | 1 | + | 1416545 | 1417202 | 1866754 |
| 84.te00045 | 34 | chr34_34.00892 | 1 | + | 1442454 | 1442900 | 1866754 |
| 84.te00050 | 34 | chr34_34.00897 | 1 | + | 1498691 | 1499134 | 1866754 |
| 84.te00054 | 34 | chr34_34.00901 | 1 | + | 1562963 | 1563217 | 1866754 |
| 84.te00056 | 34 | chr34_34.00903 | 1 | + | 1646293 | 1647044 | 1866754 |
| 84.te00061 | 34 | chr34_34.00908 | 1 | - | 1721906 | 1722246 | 1866754 |

|            |    |                |   |   |         |         |         |
|------------|----|----------------|---|---|---------|---------|---------|
| 84.te00062 | 34 | chr34_34.00909 | 1 | + | 1731308 | 1731660 | 1866754 |
| 84.te00066 | 34 | chr34_34.00913 | 1 | - | 1854318 | 1855365 | 1866754 |
| 84.te00073 | 34 | chr34_34.00755 | 1 | + | 24267   | 24665   | 1866754 |
| 84.te00098 | 34 | chr34_34.00757 | 1 | + | 47449   | 47801   | 1866754 |
| 84.te00037 | 34 | chr34_34.00886 | 1 | + | 1402349 | 1402892 | 1866754 |
| 84.te00038 | 34 | chr34_34.00887 | 1 | + | 1405074 | 1405555 | 1866754 |
| 84.te00039 | 34 | chr34_34.00888 | 1 | + | 1411244 | 1411741 | 1866754 |
| 84.te00041 | 34 | chr34_34.00890 | 1 | + | 1419291 | 1419806 | 1866754 |
| 84.te00042 | 34 | chr34_34.00891 | 1 | + | 1430203 | 1430732 | 1866754 |
| 84.te00055 | 34 | chr34_34.00902 | 1 | + | 1586323 | 1587117 | 1866754 |
| 84.te00067 | 34 | chr34_34.00914 | 1 | - | 1860957 | 1861562 | 1866754 |
| 84.te00074 | 34 | chr34_34.00751 | 2 | - | 2064    | 2448    | 1866754 |
| 84.te00078 | 34 | chr34_34.00752 | 2 | + | 3044    | 3434    | 1866754 |
| 84.te00109 | 34 | chr34_34.00753 | 2 | - | 6458    | 6862    | 1866754 |
| 84.te00012 | 34 | chr34_34.00754 | 2 | - | 11089   | 11484   | 1866754 |
| 84.te00087 | 34 | chr34_34.00756 | 2 | + | 39211   | 39615   | 1866754 |
| 84.te00007 | 34 | chr34_34.00761 | 2 | + | 106531  | 107142  | 1866754 |
| 84.te00014 | 34 | chr34_34.00762 | 2 | + | 118062  | 118669  | 1866754 |
| 84.te00044 | 34 | chr34_34.00765 | 2 | - | 143700  | 144184  | 1866754 |
| 84.te00072 | 34 | chr34_34.00770 | 2 | + | 230485  | 231032  | 1866754 |
| 84.te00075 | 34 | chr34_34.00771 | 2 | + | 255488  | 256139  | 1866754 |
| 84.te00077 | 34 | chr34_34.00773 | 2 | + | 302256  | 302700  | 1866754 |
| 84.te00081 | 34 | chr34_34.00776 | 2 | + | 338072  | 338669  | 1866754 |
| 84.te00082 | 34 | chr34_34.00777 | 2 | + | 347655  | 348260  | 1866754 |
| 84.te00083 | 34 | chr34_34.00778 | 2 | + | 352801  | 353284  | 1866754 |
| 84.te00084 | 34 | chr34_34.00779 | 2 | + | 363078  | 363681  | 1866754 |
| 84.te00086 | 34 | chr34_34.00781 | 2 | + | 388128  | 388715  | 1866754 |
| 84.te00088 | 34 | chr34_34.00782 | 2 | + | 392999  | 393603  | 1866754 |
| 84.te00089 | 34 | chr34_34.00783 | 2 | + | 407135  | 407749  | 1866754 |
| 84.te00092 | 34 | chr34_34.00786 | 2 | + | 428548  | 429165  | 1866754 |
| 84.te00094 | 34 | chr34_34.00788 | 2 | + | 449632  | 449790  | 1866754 |
| 84.te00095 | 34 | chr34_34.00789 | 2 | - | 465689  | 466327  | 1866754 |
| 84.te00097 | 34 | chr34_34.00791 | 2 | - | 471527  | 471713  | 1866754 |
| 84.te00102 | 34 | chr34_34.00795 | 2 | - | 526682  | 527298  | 1866754 |
| 84.te00103 | 34 | chr34_34.00796 | 2 | - | 531101  | 531717  | 1866754 |
| 84.te00105 | 34 | chr34_34.00797 | 2 | + | 561431  | 561674  | 1866754 |
| 84.te00106 | 34 | chr34_34.00798 | 2 | - | 585979  | 586586  | 1866754 |
| 84.te00108 | 34 | chr34_34.00800 | 2 | - | 679632  | 680131  | 1866754 |
| 84.te00154 | 34 | chr34_34.00845 | 2 | + | 878064  | 878674  | 1866754 |
| 84.te00161 | 34 | chr34_34.00851 | 2 | - | 968827  | 969337  | 1866754 |
| 84.te00164 | 34 | chr34_34.00854 | 2 | - | 982290  | 982880  | 1866754 |
| 84.te00001 | 34 | chr34_34.00855 | 2 | - | 1019065 | 1019680 | 1866754 |
| 84.te00002 | 34 | chr34_34.00856 | 2 | - | 1039476 | 1039945 | 1866754 |
| 84.te00006 | 34 | chr34_34.00859 | 2 | - | 1062822 | 1063426 | 1866754 |
| 84.te00008 | 34 | chr34_34.00860 | 2 | + | 1083887 | 1084522 | 1866754 |
| 84.te00011 | 34 | chr34_34.00863 | 2 | - | 1099333 | 1099983 | 1866754 |
| 84.te00013 | 34 | chr34_34.00864 | 2 | - | 1154822 | 1155395 | 1866754 |
| 84.te00015 | 34 | chr34_34.00865 | 2 | + | 1194518 | 1194749 | 1866754 |
| 84.te00017 | 34 | chr34_34.00867 | 2 | - | 1218996 | 1219623 | 1866754 |
| 84.te00019 | 34 | chr34_34.00869 | 2 | + | 1257585 | 1258138 | 1866754 |
| 84.te00020 | 34 | chr34_34.00870 | 2 | + | 1265188 | 1265807 | 1866754 |
| 84.te00023 | 34 | chr34_34.00873 | 2 | + | 1270834 | 1271394 | 1866754 |

|            |    |                |   |   |         |         |         |
|------------|----|----------------|---|---|---------|---------|---------|
| 84.te00026 | 34 | chr34_34.00876 | 2 | + | 1298994 | 1299585 | 1866754 |
| 84.te00027 | 34 | chr34_34.00877 | 2 | + | 1320576 | 1321166 | 1866754 |
| 84.te00028 | 34 | chr34_34.00878 | 2 | + | 1324603 | 1325187 | 1866754 |
| 84.te00029 | 34 | chr34_34.00879 | 2 | + | 1330244 | 1330854 | 1866754 |
| 84.te00031 | 34 | chr34_34.00880 | 2 | + | 1368275 | 1368887 | 1866754 |
| 84.te00034 | 34 | chr34_34.00883 | 2 | + | 1393192 | 1393757 | 1866754 |
| 84.te00046 | 34 | chr34_34.00893 | 2 | + | 1446686 | 1447210 | 1866754 |
| 84.te00047 | 34 | chr34_34.00894 | 2 | + | 1458859 | 1459482 | 1866754 |
| 84.te00048 | 34 | chr34_34.00895 | 2 | + | 1482881 | 1483546 | 1866754 |
| 84.te00049 | 34 | chr34_34.00896 | 2 | + | 1492706 | 1492993 | 1866754 |
| 84.te00051 | 34 | chr34_34.00898 | 2 | + | 1506228 | 1506757 | 1866754 |
| 84.te00052 | 34 | chr34_34.00899 | 2 | + | 1506294 | 1506499 | 1866754 |
| 84.te00053 | 34 | chr34_34.00900 | 2 | + | 1560622 | 1561204 | 1866754 |
| 84.te00057 | 34 | chr34_34.00904 | 2 | + | 1665561 | 1666149 | 1866754 |
| 84.te00058 | 34 | chr34_34.00905 | 2 | + | 1676807 | 1677354 | 1866754 |
| 84.te00059 | 34 | chr34_34.00906 | 2 | + | 1696500 | 1697120 | 1866754 |
| 84.te00060 | 34 | chr34_34.00907 | 2 | - | 1699826 | 1700447 | 1866754 |
| 84.te00063 | 34 | chr34_34.00910 | 2 | - | 1740021 | 1740622 | 1866754 |
| 84.te00064 | 34 | chr34_34.00911 | 2 | + | 1799891 | 1800508 | 1866754 |
| 84.te00065 | 34 | chr34_34.00912 | 2 | + | 1802315 | 1802925 | 1866754 |
| 85.te00225 | 35 | chr35_35.01068 | 1 | - | 71605   | 72067   | 2090491 |
| 85.te00122 | 35 | chr35_35.01069 | 1 | + | 104821  | 105257  | 2090491 |
| 85.te00134 | 35 | chr35_35.01071 | 1 | + | 114205  | 115373  | 2090491 |
| 85.te00139 | 35 | chr35_35.01072 | 1 | + | 121208  | 121571  | 2090491 |
| 85.te00140 | 35 | chr35_35.01073 | 1 | + | 123092  | 123455  | 2090491 |
| 85.te00194 | 35 | chr35_35.01075 | 1 | + | 305762  | 306405  | 2090491 |
| 85.te00195 | 35 | chr35_35.01076 | 1 | + | 325881  | 326067  | 2090491 |
| 85.te00197 | 35 | chr35_35.01078 | 1 | + | 339144  | 339562  | 2090491 |
| 85.te00198 | 35 | chr35_35.01079 | 1 | + | 352508  | 353110  | 2090491 |
| 85.te00200 | 35 | chr35_35.01081 | 1 | + | 382446  | 382743  | 2090491 |
| 85.te00201 | 35 | chr35_35.01082 | 1 | + | 382851  | 383166  | 2090491 |
| 85.te00202 | 35 | chr35_35.01083 | 1 | + | 383616  | 384175  | 2090491 |
| 85.te00206 | 35 | chr35_35.01087 | 1 | - | 460461  | 461288  | 2090491 |
| 85.te00212 | 35 | chr35_35.01092 | 1 | + | 521701  | 522069  | 2090491 |
| 85.te00213 | 35 | chr35_35.01093 | 1 | + | 523876  | 524959  | 2090491 |
| 85.te00216 | 35 | chr35_35.01096 | 1 | - | 591916  | 592989  | 2090491 |
| 85.te00222 | 35 | chr35_35.01101 | 1 | + | 657967  | 659043  | 2090491 |
| 85.te00230 | 35 | chr35_35.01108 | 1 | - | 756464  | 756499  | 2090491 |
| 85.te00231 | 35 | chr35_35.01109 | 1 | + | 764377  | 764514  | 2090491 |
| 85.te00232 | 35 | chr35_35.01110 | 1 | + | 838663  | 839068  | 2090491 |
| 85.te00235 | 35 | chr35_35.01113 | 1 | - | 864337  | 864729  | 2090491 |
| 85.te00237 | 35 | chr35_35.01115 | 1 | + | 924717  | 925939  | 2090491 |
| 85.te00240 | 35 | chr35_35.01118 | 1 | + | 981008  | 982083  | 2090491 |
| 85.te00125 | 35 | chr35_35.01122 | 1 | - | 1071380 | 1072199 | 2090491 |
| 85.te00127 | 35 | chr35_35.01124 | 1 | - | 1091176 | 1091689 | 2090491 |
| 85.te00129 | 35 | chr35_35.01125 | 1 | + | 1105881 | 1106164 | 2090491 |
| 85.te00131 | 35 | chr35_35.01127 | 1 | - | 1130754 | 1131686 | 2090491 |
| 85.te00133 | 35 | chr35_35.01129 | 1 | - | 1136734 | 1137580 | 2090491 |
| 85.te00136 | 35 | chr35_35.01131 | 1 | - | 1153181 | 1154055 | 2090491 |
| 85.te00138 | 35 | chr35_35.01133 | 1 | - | 1191905 | 1192979 | 2090491 |
| 85.te00141 | 35 | chr35_35.01134 | 1 | - | 1230221 | 1231402 | 2090491 |
| 85.te00142 | 35 | chr35_35.01135 | 1 | - | 1233103 | 1233621 | 2090491 |

|            |    |                |   |   |         |         |         |
|------------|----|----------------|---|---|---------|---------|---------|
| 85.te00143 | 35 | chr35_35.01136 | 1 | - | 1244370 | 1244822 | 2090491 |
| 85.te00149 | 35 | chr35_35.01142 | 1 | + | 1406646 | 1407402 | 2090491 |
| 85.te00151 | 35 | chr35_35.01144 | 1 | + | 1422091 | 1422477 | 2090491 |
| 85.te00152 | 35 | chr35_35.01145 | 1 | + | 1423802 | 1424725 | 2090491 |
| 85.te00155 | 35 | chr35_35.01148 | 1 | - | 1451702 | 1452618 | 2090491 |
| 85.te00156 | 35 | chr35_35.01149 | 1 | - | 1453954 | 1454328 | 2090491 |
| 85.te00159 | 35 | chr35_35.01152 | 1 | - | 1487412 | 1488330 | 2090491 |
| 85.te00162 | 35 | chr35_35.01155 | 1 | + | 1585024 | 1585788 | 2090491 |
| 85.te00163 | 35 | chr35_35.01156 | 1 | + | 1600926 | 1601844 | 2090491 |
| 85.te00166 | 35 | chr35_35.01159 | 1 | + | 1706398 | 1707270 | 2090491 |
| 85.te00168 | 35 | chr35_35.01161 | 1 | + | 1729878 | 1730226 | 2090491 |
| 85.te00169 | 35 | chr35_35.01162 | 1 | + | 1731427 | 1732313 | 2090491 |
| 85.te00171 | 35 | chr35_35.01164 | 1 | - | 1803448 | 1803723 | 2090491 |
| 85.te00173 | 35 | chr35_35.01166 | 1 | + | 1829211 | 1829448 | 2090491 |
| 85.te00174 | 35 | chr35_35.01167 | 1 | + | 1835794 | 1836213 | 2090491 |
| 85.te00181 | 35 | chr35_35.01174 | 1 | - | 1941384 | 1941589 | 2090491 |
| 85.te00182 | 35 | chr35_35.01175 | 1 | - | 1942891 | 1943641 | 2090491 |
| 85.te00189 | 35 | chr35_35.01182 | 1 | + | 2029544 | 2029757 | 2090491 |
| 85.te00190 | 35 | chr35_35.01183 | 1 | + | 2059060 | 2059644 | 2090491 |
| 85.te00191 | 35 | chr35_35.01184 | 1 | + | 2063721 | 2064706 | 2090491 |
| 85.te00192 | 35 | chr35_35.01185 | 1 | - | 2067597 | 2068343 | 2090491 |
| 85.te00128 | 35 | chr35_35.01070 | 1 | - | 108750  | 109344  | 2090491 |
| 85.te00124 | 35 | chr35_35.01065 | 2 | - | 10093   | 10677   | 2090491 |
| 85.te00207 | 35 | chr35_35.01066 | 2 | - | 45720   | 46312   | 2090491 |
| 85.te00218 | 35 | chr35_35.01067 | 2 | + | 63256   | 63826   | 2090491 |
| 85.te00193 | 35 | chr35_35.01074 | 2 | + | 280016  | 280630  | 2090491 |
| 85.te00196 | 35 | chr35_35.01077 | 2 | + | 335142  | 335776  | 2090491 |
| 85.te00199 | 35 | chr35_35.01080 | 2 | + | 356557  | 357151  | 2090491 |
| 85.te00203 | 35 | chr35_35.01084 | 2 | + | 405754  | 406357  | 2090491 |
| 85.te00204 | 35 | chr35_35.01085 | 2 | + | 436081  | 436649  | 2090491 |
| 85.te00205 | 35 | chr35_35.01086 | 2 | - | 447552  | 448139  | 2090491 |
| 85.te00208 | 35 | chr35_35.01088 | 2 | + | 471027  | 471568  | 2090491 |
| 85.te00209 | 35 | chr35_35.01089 | 2 | - | 491437  | 491794  | 2090491 |
| 85.te00210 | 35 | chr35_35.01090 | 2 | - | 494371  | 494911  | 2090491 |
| 85.te00211 | 35 | chr35_35.01091 | 2 | - | 516288  | 516763  | 2090491 |
| 85.te00214 | 35 | chr35_35.01094 | 2 | + | 563403  | 563964  | 2090491 |
| 85.te00215 | 35 | chr35_35.01095 | 2 | - | 571776  | 572334  | 2090491 |
| 85.te00217 | 35 | chr35_35.01097 | 2 | + | 613989  | 614582  | 2090491 |
| 85.te00219 | 35 | chr35_35.01098 | 2 | + | 635840  | 636326  | 2090491 |
| 85.te00220 | 35 | chr35_35.01099 | 2 | - | 641647  | 642182  | 2090491 |
| 85.te00221 | 35 | chr35_35.01100 | 2 | - | 648249  | 648745  | 2090491 |
| 85.te00223 | 35 | chr35_35.01102 | 2 | - | 678044  | 678594  | 2090491 |
| 85.te00224 | 35 | chr35_35.01103 | 2 | - | 707571  | 708125  | 2090491 |
| 85.te00226 | 35 | chr35_35.01104 | 2 | - | 722665  | 723251  | 2090491 |
| 85.te00227 | 35 | chr35_35.01105 | 2 | - | 728915  | 729467  | 2090491 |
| 85.te00228 | 35 | chr35_35.01106 | 2 | + | 743252  | 743823  | 2090491 |
| 85.te00229 | 35 | chr35_35.01107 | 2 | + | 754567  | 755126  | 2090491 |
| 85.te00233 | 35 | chr35_35.01111 | 2 | + | 849692  | 850272  | 2090491 |
| 85.te00234 | 35 | chr35_35.01112 | 2 | + | 857014  | 857596  | 2090491 |
| 85.te00236 | 35 | chr35_35.01114 | 2 | + | 877911  | 878452  | 2090491 |
| 85.te00238 | 35 | chr35_35.01116 | 2 | + | 952513  | 953126  | 2090491 |
| 85.te00239 | 35 | chr35_35.01117 | 2 | - | 980557  | 980756  | 2090491 |



|            |    |                |   |   |         |         |         |
|------------|----|----------------|---|---|---------|---------|---------|
| 85.te00241 | 35 | chr35_35.01119 | 2 | - | 982304  | 982508  | 2090491 |
| 85.te00242 | 35 | chr35_35.01120 | 2 | + | 997635  | 998263  | 2090491 |
| 85.te00123 | 35 | chr35_35.01121 | 2 | + | 1053343 | 1053939 | 2090491 |
| 85.te00126 | 35 | chr35_35.01123 | 2 | + | 1087483 | 1087922 | 2090491 |
| 85.te00130 | 35 | chr35_35.01126 | 2 | - | 1110526 | 1111098 | 2090491 |
| 85.te00132 | 35 | chr35_35.01128 | 2 | - | 1133109 | 1133666 | 2090491 |
| 85.te00135 | 35 | chr35_35.01130 | 2 | - | 1148999 | 1149506 | 2090491 |
| 85.te00137 | 35 | chr35_35.01132 | 2 | - | 1191163 | 1191738 | 2090491 |
| 85.te00144 | 35 | chr35_35.01137 | 2 | - | 1326412 | 1327034 | 2090491 |
| 85.te00145 | 35 | chr35_35.01138 | 2 | + | 1356587 | 1357192 | 2090491 |
| 85.te00146 | 35 | chr35_35.01139 | 2 | - | 1362508 | 1363088 | 2090491 |
| 85.te00147 | 35 | chr35_35.01140 | 2 | - | 1396961 | 1397505 | 2090491 |
| 85.te00148 | 35 | chr35_35.01141 | 2 | + | 1405035 | 1405562 | 2090491 |
| 85.te00150 | 35 | chr35_35.01143 | 2 | - | 1407405 | 1407922 | 2090491 |
| 85.te00153 | 35 | chr35_35.01146 | 2 | - | 1445402 | 1445848 | 2090491 |
| 85.te00154 | 35 | chr35_35.01147 | 2 | - | 1451236 | 1451684 | 2090491 |
| 85.te00157 | 35 | chr35_35.01150 | 2 | - | 1464748 | 1465131 | 2090491 |
| 85.te00158 | 35 | chr35_35.01151 | 2 | - | 1486901 | 1487398 | 2090491 |
| 85.te00160 | 35 | chr35_35.01153 | 2 | - | 1543191 | 1543737 | 2090491 |
| 85.te00161 | 35 | chr35_35.01154 | 2 | + | 1566975 | 1567548 | 2090491 |
| 85.te00164 | 35 | chr35_35.01157 | 2 | + | 1630776 | 1631367 | 2090491 |
| 85.te00165 | 35 | chr35_35.01158 | 2 | + | 1697567 | 1698137 | 2090491 |
| 85.te00167 | 35 | chr35_35.01160 | 2 | - | 1713355 | 1713934 | 2090491 |
| 85.te00170 | 35 | chr35_35.01163 | 2 | + | 1788561 | 1789078 | 2090491 |
| 85.te00172 | 35 | chr35_35.01165 | 2 | + | 1811470 | 1812125 | 2090491 |
| 85.te00175 | 35 | chr35_35.01168 | 2 | + | 1838713 | 1839355 | 2090491 |
| 85.te00176 | 35 | chr35_35.01169 | 2 | + | 1851097 | 1851728 | 2090491 |
| 85.te00177 | 35 | chr35_35.01170 | 2 | - | 1872506 | 1873128 | 2090491 |
| 85.te00178 | 35 | chr35_35.01171 | 2 | + | 1884803 | 1885309 | 2090491 |
| 85.te00179 | 35 | chr35_35.01172 | 2 | + | 1913179 | 1913756 | 2090491 |
| 85.te00180 | 35 | chr35_35.01173 | 2 | + | 1921566 | 1922153 | 2090491 |
| 85.te00183 | 35 | chr35_35.01176 | 2 | + | 1961042 | 1961715 | 2090491 |
| 85.te00184 | 35 | chr35_35.01177 | 2 | + | 1976295 | 1976956 | 2090491 |
| 85.te00185 | 35 | chr35_35.01178 | 2 | + | 1983441 | 1984102 | 2090491 |
| 85.te00186 | 35 | chr35_35.01179 | 2 | + | 1987446 | 1988102 | 2090491 |
| 85.te00187 | 35 | chr35_35.01180 | 2 | + | 2019641 | 2020201 | 2090491 |
| 85.te00188 | 35 | chr35_35.01181 | 2 | + | 2022219 | 2022763 | 2090491 |
| 86.te00152 | 36 | chr36_36.01003 | 1 | - | 12395   | 13274   | 2682183 |
| 86.te00236 | 36 | chr36_36.01004 | 1 | - | 26811   | 27793   | 2682183 |
| 86.te00280 | 36 | chr36_36.01008 | 1 | + | 86672   | 86916   | 2682183 |
| 86.te00172 | 36 | chr36_36.01010 | 1 | + | 176043  | 176981  | 2682183 |
| 86.te00186 | 36 | chr36_36.01011 | 1 | + | 193247  | 193627  | 2682183 |
| 86.te00188 | 36 | chr36_36.01012 | 1 | + | 194151  | 194837  | 2682183 |
| 86.te00201 | 36 | chr36_36.01014 | 1 | + | 215543  | 216043  | 2682183 |
| 86.te00202 | 36 | chr36_36.01015 | 1 | + | 216449  | 217201  | 2682183 |
| 86.te00211 | 36 | chr36_36.01016 | 1 | + | 232529  | 233024  | 2682183 |
| 86.te00212 | 36 | chr36_36.01017 | 1 | + | 233421  | 234217  | 2682183 |
| 86.te00234 | 36 | chr36_36.01018 | 1 | + | 263384  | 264060  | 2682183 |
| 86.te00238 | 36 | chr36_36.01020 | 1 | + | 305914  | 306639  | 2682183 |
| 86.te00241 | 36 | chr36_36.01023 | 1 | + | 319281  | 319480  | 2682183 |
| 86.te00243 | 36 | chr36_36.01025 | 1 | + | 348168  | 348443  | 2682183 |
| 86.te00245 | 36 | chr36_36.01027 | 1 | + | 379139  | 380224  | 2682183 |

|            |    |                |   |   |         |         |         |
|------------|----|----------------|---|---|---------|---------|---------|
| 86.te00247 | 36 | chr36_36.01029 | 1 | + | 431268  | 432053  | 2682183 |
| 86.te00250 | 36 | chr36_36.01032 | 1 | - | 464838  | 465830  | 2682183 |
| 86.te00251 | 36 | chr36_36.01033 | 1 | - | 466887  | 467493  | 2682183 |
| 86.te00252 | 36 | chr36_36.01034 | 1 | + | 470062  | 470798  | 2682183 |
| 86.te00257 | 36 | chr36_36.01038 | 1 | + | 502904  | 503071  | 2682183 |
| 86.te00258 | 36 | chr36_36.01039 | 1 | + | 511133  | 511968  | 2682183 |
| 86.te00260 | 36 | chr36_36.01041 | 1 | - | 569059  | 569989  | 2682183 |
| 86.te00262 | 36 | chr36_36.01043 | 1 | - | 578306  | 579142  | 2682183 |
| 86.te00266 | 36 | chr36_36.01047 | 1 | - | 596158  | 597225  | 2682183 |
| 86.te00274 | 36 | chr36_36.01053 | 1 | - | 811633  | 812079  | 2682183 |
| 86.te00276 | 36 | chr36_36.01055 | 1 | + | 830000  | 830367  | 2682183 |
| 86.te00277 | 36 | chr36_36.01056 | 1 | + | 837352  | 837727  | 2682183 |
| 86.te00278 | 36 | chr36_36.01057 | 1 | - | 843069  | 843335  | 2682183 |
| 86.te00279 | 36 | chr36_36.01058 | 1 | + | 856877  | 857890  | 2682183 |
| 86.te00281 | 36 | chr36_36.01059 | 1 | + | 888817  | 889578  | 2682183 |
| 86.te00285 | 36 | chr36_36.01063 | 1 | + | 962537  | 962990  | 2682183 |
| 86.te00287 | 36 | chr36_36.01065 | 1 | - | 994711  | 995064  | 2682183 |
| 86.te00137 | 36 | chr36_36.01067 | 1 | - | 1005654 | 1006107 | 2682183 |
| 86.te00138 | 36 | chr36_36.01068 | 1 | + | 1024673 | 1025122 | 2682183 |
| 86.te00141 | 36 | chr36_36.01071 | 1 | - | 1055945 | 1056139 | 2682183 |
| 86.te00144 | 36 | chr36_36.01074 | 1 | + | 1112180 | 1112417 | 2682183 |
| 86.te00149 | 36 | chr36_36.01078 | 1 | + | 1174750 | 1175209 | 2682183 |
| 86.te00150 | 36 | chr36_36.01079 | 1 | + | 1180863 | 1181287 | 2682183 |
| 86.te00153 | 36 | chr36_36.01081 | 1 | - | 1345807 | 1346652 | 2682183 |
| 86.te00154 | 36 | chr36_36.01082 | 1 | - | 1389081 | 1389346 | 2682183 |
| 86.te00158 | 36 | chr36_36.01086 | 1 | + | 1505837 | 1506678 | 2682183 |
| 86.te00161 | 36 | chr36_36.01089 | 1 | + | 1551899 | 1552072 | 2682183 |
| 86.te00162 | 36 | chr36_36.01090 | 1 | - | 1553865 | 1554064 | 2682183 |
| 86.te00163 | 36 | chr36_36.01091 | 1 | + | 1561262 | 1561666 | 2682183 |
| 86.te00165 | 36 | chr36_36.01093 | 1 | + | 1577981 | 1578294 | 2682183 |
| 86.te00168 | 36 | chr36_36.01096 | 1 | + | 1635302 | 1636327 | 2682183 |
| 86.te00169 | 36 | chr36_36.01097 | 1 | + | 1656045 | 1657066 | 2682183 |
| 86.te00171 | 36 | chr36_36.01099 | 1 | + | 1754626 | 1755366 | 2682183 |
| 86.te00174 | 36 | chr36_36.01101 | 1 | + | 1765683 | 1766330 | 2682183 |
| 86.te00177 | 36 | chr36_36.01104 | 1 | - | 1790323 | 1790544 | 2682183 |
| 86.te00178 | 36 | chr36_36.01105 | 1 | + | 1819240 | 1819887 | 2682183 |
| 86.te00179 | 36 | chr36_36.01106 | 1 | + | 1822135 | 1822780 | 2682183 |
| 86.te00180 | 36 | chr36_36.01107 | 1 | - | 1838674 | 1838849 | 2682183 |
| 86.te00181 | 36 | chr36_36.01108 | 1 | + | 1851847 | 1852392 | 2682183 |
| 86.te00183 | 36 | chr36_36.01110 | 1 | - | 1906340 | 1907089 | 2682183 |
| 86.te00185 | 36 | chr36_36.01112 | 1 | - | 1928183 | 1928929 | 2682183 |
| 86.te00190 | 36 | chr36_36.01115 | 1 | - | 1994222 | 1994918 | 2682183 |
| 86.te00192 | 36 | chr36_36.01117 | 1 | - | 2048082 | 2048621 | 2682183 |
| 86.te00193 | 36 | chr36_36.01118 | 1 | - | 2079273 | 2079969 | 2682183 |
| 86.te00195 | 36 | chr36_36.01120 | 1 | - | 2085860 | 2086538 | 2682183 |
| 86.te00197 | 36 | chr36_36.01121 | 1 | - | 2111940 | 2112595 | 2682183 |
| 86.te00199 | 36 | chr36_36.01123 | 1 | - | 2135672 | 2136324 | 2682183 |
| 86.te00205 | 36 | chr36_36.01127 | 1 | - | 2188998 | 2189927 | 2682183 |
| 86.te00208 | 36 | chr36_36.01130 | 1 | - | 2268878 | 2269941 | 2682183 |
| 86.te00209 | 36 | chr36_36.01131 | 1 | - | 2284899 | 2285381 | 2682183 |
| 86.te00215 | 36 | chr36_36.01135 | 1 | - | 2402075 | 2403247 | 2682183 |
| 86.te00216 | 36 | chr36_36.01136 | 1 | + | 2439039 | 2440141 | 2682183 |

|            |    |                |   |   |         |         |         |
|------------|----|----------------|---|---|---------|---------|---------|
| 86.te00220 | 36 | chr36_36.01140 | 1 | - | 2507189 | 2507446 | 2682183 |
| 86.te00221 | 36 | chr36_36.01141 | 1 | - | 2507577 | 2508056 | 2682183 |
| 86.te00222 | 36 | chr36_36.01142 | 1 | - | 2513813 | 2514276 | 2682183 |
| 86.te00223 | 36 | chr36_36.01143 | 1 | + | 2538005 | 2538271 | 2682183 |
| 86.te00224 | 36 | chr36_36.01144 | 1 | + | 2538282 | 2538950 | 2682183 |
| 86.te00226 | 36 | chr36_36.01146 | 1 | + | 2574302 | 2574760 | 2682183 |
| 86.te00230 | 36 | chr36_36.01150 | 1 | + | 2596544 | 2596810 | 2682183 |
| 86.te00231 | 36 | chr36_36.01151 | 1 | + | 2596827 | 2597506 | 2682183 |
| 86.te00284 | 36 | chr36_36.01062 | 1 | + | 948549  | 949068  | 2682183 |
| 86.te00254 | 36 | chr36_36.01005 | 2 | - | 47630   | 48236   | 2682183 |
| 86.te00268 | 36 | chr36_36.01006 | 2 | - | 68903   | 69488   | 2682183 |
| 86.te00272 | 36 | chr36_36.01007 | 2 | - | 77582   | 78171   | 2682183 |
| 86.te00148 | 36 | chr36_36.01009 | 2 | + | 116395  | 116974  | 2682183 |
| 86.te00196 | 36 | chr36_36.01013 | 2 | + | 208842  | 209435  | 2682183 |
| 86.te00237 | 36 | chr36_36.01019 | 2 | + | 304763  | 305123  | 2682183 |
| 86.te00239 | 36 | chr36_36.01021 | 2 | + | 309270  | 309594  | 2682183 |
| 86.te00240 | 36 | chr36_36.01022 | 2 | - | 318998  | 319280  | 2682183 |
| 86.te00242 | 36 | chr36_36.01024 | 2 | + | 346529  | 347020  | 2682183 |
| 86.te00244 | 36 | chr36_36.01026 | 2 | + | 352423  | 352961  | 2682183 |
| 86.te00246 | 36 | chr36_36.01028 | 2 | + | 405242  | 405897  | 2682183 |
| 86.te00248 | 36 | chr36_36.01030 | 2 | + | 438741  | 439264  | 2682183 |
| 86.te00249 | 36 | chr36_36.01031 | 2 | + | 453354  | 453840  | 2682183 |
| 86.te00253 | 36 | chr36_36.01035 | 2 | + | 478877  | 479400  | 2682183 |
| 86.te00255 | 36 | chr36_36.01036 | 2 | - | 490656  | 491134  | 2682183 |
| 86.te00256 | 36 | chr36_36.01037 | 2 | + | 493309  | 493786  | 2682183 |
| 86.te00259 | 36 | chr36_36.01040 | 2 | - | 563308  | 563845  | 2682183 |
| 86.te00261 | 36 | chr36_36.01042 | 2 | - | 571000  | 571556  | 2682183 |
| 86.te00263 | 36 | chr36_36.01044 | 2 | - | 583578  | 584096  | 2682183 |
| 86.te00264 | 36 | chr36_36.01045 | 2 | - | 585810  | 586346  | 2682183 |
| 86.te00265 | 36 | chr36_36.01046 | 2 | + | 590522  | 591039  | 2682183 |
| 86.te00267 | 36 | chr36_36.01048 | 2 | - | 630144  | 630654  | 2682183 |
| 86.te00269 | 36 | chr36_36.01049 | 2 | - | 724675  | 725074  | 2682183 |
| 86.te00270 | 36 | chr36_36.01050 | 2 | - | 768107  | 768667  | 2682183 |
| 86.te00271 | 36 | chr36_36.01051 | 2 | - | 769756  | 770276  | 2682183 |
| 86.te00273 | 36 | chr36_36.01052 | 2 | - | 787982  | 788426  | 2682183 |
| 86.te00275 | 36 | chr36_36.01054 | 2 | + | 824346  | 824912  | 2682183 |
| 86.te00282 | 36 | chr36_36.01060 | 2 | + | 911302  | 911903  | 2682183 |
| 86.te00283 | 36 | chr36_36.01061 | 2 | + | 933318  | 933906  | 2682183 |
| 86.te00286 | 36 | chr36_36.01064 | 2 | + | 983348  | 983959  | 2682183 |
| 86.te00288 | 36 | chr36_36.01066 | 2 | + | 997474  | 998038  | 2682183 |
| 86.te00139 | 36 | chr36_36.01069 | 2 | + | 1026030 | 1026581 | 2682183 |
| 86.te00140 | 36 | chr36_36.01070 | 2 | - | 1038392 | 1038933 | 2682183 |
| 86.te00142 | 36 | chr36_36.01072 | 2 | - | 1084645 | 1085044 | 2682183 |
| 86.te00143 | 36 | chr36_36.01073 | 2 | - | 1110464 | 1110866 | 2682183 |
| 86.te00145 | 36 | chr36_36.01075 | 2 | - | 1121789 | 1122202 | 2682183 |
| 86.te00146 | 36 | chr36_36.01076 | 2 | - | 1130476 | 1130884 | 2682183 |
| 86.te00147 | 36 | chr36_36.01077 | 2 | - | 1154355 | 1154778 | 2682183 |
| 86.te00151 | 36 | chr36_36.01080 | 2 | - | 1301316 | 1301897 | 2682183 |
| 86.te00155 | 36 | chr36_36.01083 | 2 | - | 1404297 | 1404876 | 2682183 |
| 86.te00156 | 36 | chr36_36.01084 | 2 | + | 1409822 | 1410395 | 2682183 |
| 86.te00157 | 36 | chr36_36.01085 | 2 | + | 1460723 | 1461333 | 2682183 |
| 86.te00159 | 36 | chr36_36.01087 | 2 | - | 1513973 | 1514565 | 2682183 |

|            |    |                |   |   |         |         |         |
|------------|----|----------------|---|---|---------|---------|---------|
| 86.te00160 | 36 | chr36_36.01088 | 2 | + | 1529778 | 1530361 | 2682183 |
| 86.te00164 | 36 | chr36_36.01092 | 2 | + | 1573130 | 1573329 | 2682183 |
| 86.te00166 | 36 | chr36_36.01094 | 2 | + | 1604513 | 1605071 | 2682183 |
| 86.te00167 | 36 | chr36_36.01095 | 2 | - | 1627695 | 1628224 | 2682183 |
| 86.te00170 | 36 | chr36_36.01098 | 2 | + | 1671431 | 1671994 | 2682183 |
| 86.te00173 | 36 | chr36_36.01100 | 2 | + | 1764346 | 1764960 | 2682183 |
| 86.te00175 | 36 | chr36_36.01102 | 2 | + | 1771696 | 1772335 | 2682183 |
| 86.te00176 | 36 | chr36_36.01103 | 2 | + | 1789862 | 1790129 | 2682183 |
| 86.te00182 | 36 | chr36_36.01109 | 2 | + | 1885590 | 1886168 | 2682183 |
| 86.te00184 | 36 | chr36_36.01111 | 2 | + | 1907674 | 1908283 | 2682183 |
| 86.te00187 | 36 | chr36_36.01113 | 2 | - | 1938645 | 1939198 | 2682183 |
| 86.te00189 | 36 | chr36_36.01114 | 2 | - | 1981246 | 1981818 | 2682183 |
| 86.te00191 | 36 | chr36_36.01116 | 2 | - | 2010807 | 2011317 | 2682183 |
| 86.te00194 | 36 | chr36_36.01119 | 2 | - | 2081903 | 2082493 | 2682183 |
| 86.te00198 | 36 | chr36_36.01122 | 2 | - | 2132585 | 2133219 | 2682183 |
| 86.te00200 | 36 | chr36_36.01124 | 2 | - | 2138067 | 2138445 | 2682183 |
| 86.te00203 | 36 | chr36_36.01125 | 2 | + | 2175021 | 2175274 | 2682183 |
| 86.te00204 | 36 | chr36_36.01126 | 2 | + | 2182614 | 2182915 | 2682183 |
| 86.te00206 | 36 | chr36_36.01128 | 2 | - | 2246356 | 2246916 | 2682183 |
| 86.te00207 | 36 | chr36_36.01129 | 2 | + | 2265105 | 2265688 | 2682183 |
| 86.te00210 | 36 | chr36_36.01132 | 2 | - | 2292375 | 2292864 | 2682183 |
| 86.te00213 | 36 | chr36_36.01133 | 2 | - | 2346633 | 2347201 | 2682183 |
| 86.te00214 | 36 | chr36_36.01134 | 2 | - | 2394622 | 2395109 | 2682183 |
| 86.te00217 | 36 | chr36_36.01137 | 2 | - | 2442201 | 2442731 | 2682183 |
| 86.te00218 | 36 | chr36_36.01138 | 2 | - | 2471638 | 2472088 | 2682183 |
| 86.te00219 | 36 | chr36_36.01139 | 2 | - | 2496551 | 2497046 | 2682183 |
| 86.te00225 | 36 | chr36_36.01145 | 2 | - | 2571585 | 2572178 | 2682183 |
| 86.te00227 | 36 | chr36_36.01147 | 2 | - | 2577836 | 2578366 | 2682183 |
| 86.te00228 | 36 | chr36_36.01148 | 2 | - | 2585844 | 2586424 | 2682183 |
| 86.te00229 | 36 | chr36_36.01149 | 2 | - | 2595361 | 2595982 | 2682183 |
| 86.te00232 | 36 | chr36_36.01152 | 2 | - | 2602295 | 2602922 | 2682183 |
| 86.te00233 | 36 | chr36_36.01153 | 2 | - | 2629891 | 2630480 | 2682183 |
| 86.te00235 | 36 | chr36_36.01154 | 2 | - | 2644826 | 2645451 | 2682183 |
