# Supplementary material for: Members of a Large Retroposon Family Are Determinants of Post-Transcriptional Gene Expression in Leishmania
Source: PubMed Central journal article supplement (PMC2323293; doi:10.1371/journal.ppat.0030136), 2007-09-28
Supplement: ppat.0030136.st002.pdf [file ppat.0030136.st002.pdf]

**Table S2.** Differential gene expression of *L. major* SIDER2-containing transcripts analyzed by DNA microarrays.

| <b>Code GeneDB</b>                                |                                                 |                                                      |
|---------------------------------------------------|-------------------------------------------------|------------------------------------------------------|
| <b>Promastigote-specific<sup>1</sup></b><br>(26%) | <b>Amastigote-specific<sup>1</sup></b><br>(24%) | <b>Constitutively expressed<sup>1</sup></b><br>(50%) |
| LmjF21.1250                                       | LmjF30.1500                                     | LmjF30.0120                                          |
| LmjF01.0220                                       | *LmjF28.1400                                    | LmjF24.1270                                          |
| LmjF33.2540                                       | LmjF19.0700                                     | LmjF35.0570                                          |
| LmjF33.2340                                       | LmjF25.2380                                     | LmjF25.2350                                          |
| LmjF22.0690                                       | LmjF28.0330                                     | LmjF24.0380                                          |
| *LmjF31.1890                                      | LmjF24.1360                                     | LmjF03.0600                                          |
| *LmjF33.2550                                      | *LmjF34.0980                                    | LmjF18.1520                                          |
| LmjF35.0970                                       | LmjF10.0400                                     | LmjF05.0140                                          |
| LmjF05.0060                                       | *LmjF34.0500                                    | LmjF18.0560                                          |
| LmjF23.0880                                       |                                                 | *LmjF08.1270                                         |
|                                                   |                                                 | LmjF33.0900                                          |
|                                                   |                                                 | LmjF36.2750                                          |
|                                                   |                                                 | LmjF35.3340                                          |
|                                                   |                                                 | *LmjF28.2860                                         |
|                                                   |                                                 | LmjF25.2280                                          |
|                                                   |                                                 | LmjF19.0180                                          |
|                                                   |                                                 | LmjF24.1260                                          |
|                                                   |                                                 | LmjF36.3810                                          |
|                                                   |                                                 | LmjF13.0440                                          |

\*Confirmed by quantitative real-time RT-PCR.

<sup>1</sup>The data presented here are the median of four independent experiments with a standard deviation of  $\leq 0.05$ . Differentially expressed mRNAs have an amastigote (A)/promastigote (P) or a P/A ratio  $> 2.0$ .
