# Supplementary material for: Members of a Large Retroposon Family Are Determinants of Post-Transcriptional Gene Expression in Leishmania
Source: PLoS Pathog. 2007 Sep 28;3(9):e136. doi: 10.1371/journal.ppat.0030136 (PMC2323293; doi:10.1371/journal.ppat.0030136)
Supplement: Table S3 — (59 KB PDF) [file ppat.0030136.st003.pdf]

**Table S3.** Primers used for the generation of the luciferase-expressing vectors.

| PCR fragment   | Size (bp)   | Primer sequence                                                                                                          | Restriction site<br>(underlined)                               |
|----------------|-------------|--------------------------------------------------------------------------------------------------------------------------|----------------------------------------------------------------|
| LUC-3'UTR3810  | 2371        | 5' GGCCGGGATCCGACGAACACA 3'<br>5' AATAAGAGCGGATCCCCAAGC 3'                                                               | <i>Bam</i> HI<br><i>Bam</i> HI                                 |
| LUC-ΔSIDER3810 | 674<br>1047 | 5' GGCCGGGATCCGACGAACACA 3'<br>5' GTCTGCACTGCAGACCAAGC 3'<br>5' CGCGTGCTGCAGTCTTGCCTTT 3'<br>5' AATAAGAGCGGATCCCCAAGC 3' | <i>Bam</i> HI<br><i>Pst</i> I<br><i>Pst</i> I<br><i>Bam</i> HI |
| LUC-SIDER3810  | 1006        | 5' CGTGTGTACCGGATCCGCGCA 3'<br>5' CAAGCCCCGGATCCGTGTGCGG 3'                                                              | <i>Bam</i> HI<br><i>Bam</i> HI                                 |
| LUC-SIDER3810  | 634         | 5' GCTTGGATCCGCTGTGCAGAC 3'<br>5' GGATCCAAGACAGCTGACGCG 3'                                                               | <i>Bam</i> HI<br><i>Bam</i> HI                                 |
| LUC-3'UTR1270  | 1553        | 5' GCGGCCGGATCCGCGCGAGCA 3'<br>5' AAGCTTTGGATCCCCTTTCCCTC 3'                                                             | <i>Bam</i> HI<br><i>Bam</i> HI                                 |
| LUC-ΔSIDER1270 | 854         | 5' GCGGCCGGATCCGCGCGAGCA 3'<br>5' AAGCTTGGATCCAGAAATGCACTG 3'                                                            | <i>Bam</i> HI<br><i>Bam</i> HI                                 |
| LUC-SIDER1270  | 699         | 5' GGATCCGGCCGTCTCGTGCCT 3'<br>5' AAGCTTTGGATCCCCTTTCCCTC 3'                                                             | <i>Bam</i> HI<br><i>Bam</i> HI                                 |
